# Supplementary material
Source: PubMed Central journal article supplement (PMC3769319)

MS/MS Fragmentation of **AVTKYTSSK**

Found in **IPI00111957**, Histone H2B type 1-A (Mus musculus)

Match to Query 15067: 1097.572048 from (549.793300, 2+) intensity (1858.7252)

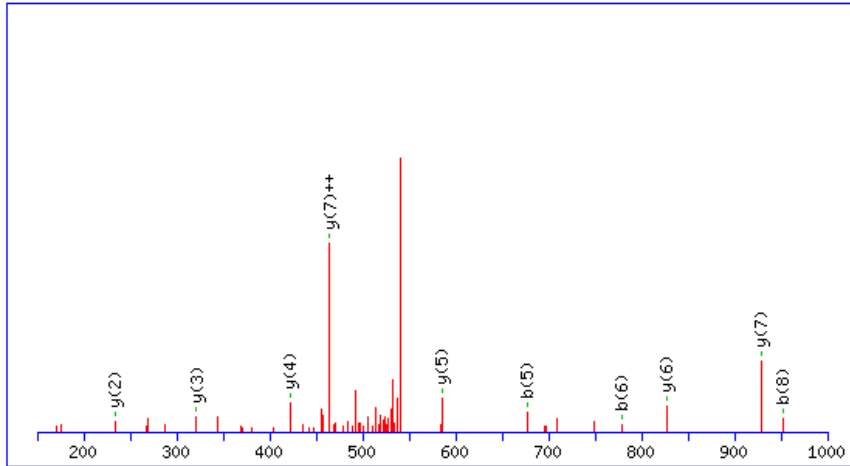

Monoisotopic mass of neutral peptide Mr(calc): 1097.5717

Variable modifications:

K4 : GlyGly (K)

Ions Score: 47 Expect: 0.002

Matches : 10/84 fragment ions using 16 most intense peaks

| # | b        | b <sup>++</sup> | b <sup>*</sup> | b <sup>*++</sup> | b <sup>0</sup> | b <sup>0++</sup> | Seq. | y         | y <sup>++</sup> | y <sup>*</sup> | y <sup>*++</sup> | y <sup>0</sup> | y <sup>0++</sup> | # |
|---|----------|-----------------|----------------|------------------|----------------|------------------|------|-----------|-----------------|----------------|------------------|----------------|------------------|---|
| 1 | 72.0444  | 36.5258         |                |                  |                |                  | A    |           |                 |                |                  |                |                  | 9 |
| 2 | 171.1128 | 86.0600         |                |                  |                |                  | V    | 1027.5419 | 514.2746        | 1010.5153      | 505.7613         | 1009.5313      | 505.2693         | 8 |
| 3 | 272.1605 | 136.5839        |                |                  | 254.1499       | 127.5786         | T    | 928.4734  | 464.7404        | 911.4469       | 456.2271         | 910.4629       | 455.7351         | 7 |
| 4 | 514.2984 | 257.6528        | 497.2718       | 249.1396         | 496.2878       | 248.6475         | K    | 827.4258  | 414.2165        | 810.3992       | 405.7032         | 809.4152       | 405.2112         | 6 |
| 5 | 677.3617 | 339.1845        | 660.3352       | 330.6712         | 659.3511       | 330.1792         | Y    | 585.2879  | 293.1476        | 568.2613       | 284.6343         | 567.2773       | 284.1423         | 5 |
| 6 | 778.4094 | 389.7083        | 761.3828       | 381.1951         | 760.3988       | 380.7030         | T    | 422.2245  | 211.6159        | 405.1980       | 203.1026         | 404.2140       | 202.6106         | 4 |
| 7 | 865.4414 | 433.2243        | 848.4149       | 424.7111         | 847.4308       | 424.2191         | S    | 321.1769  | 161.0921        | 304.1503       | 152.5788         | 303.1663       | 152.0868         | 3 |
| 8 | 952.4734 | 476.7404        | 935.4469       | 468.2271         | 934.4629       | 467.7351         | S    | 234.1448  | 117.5761        | 217.1183       | 109.0628         | 216.1343       | 108.5708         | 2 |
| 9 |          |                 |                |                  |                |                  | K    | 147.1128  | 74.0600         | 130.0863       | 65.5468          |                |                  | 1 |

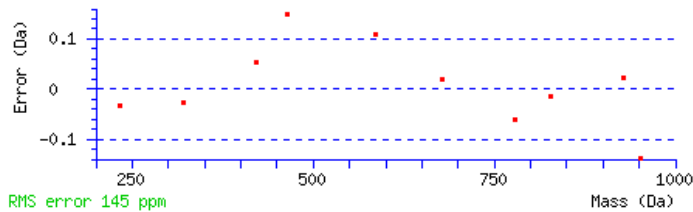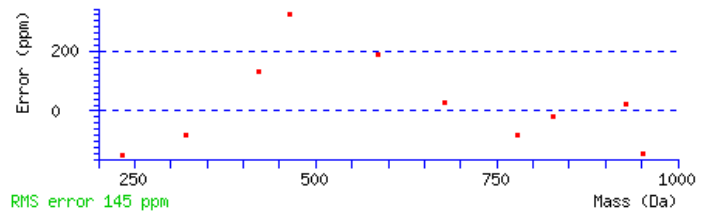

MS/MS Fragmentation of **KSVTEGSSK**

Found in **IPI00119808**, ATP-dependent Clp protease ATP-binding subunit clpX-like mitochondrial (Mus musculus)

Match to Query 16051: 1115.491648 from (558.753100, 2+) intensity (3090.5637)

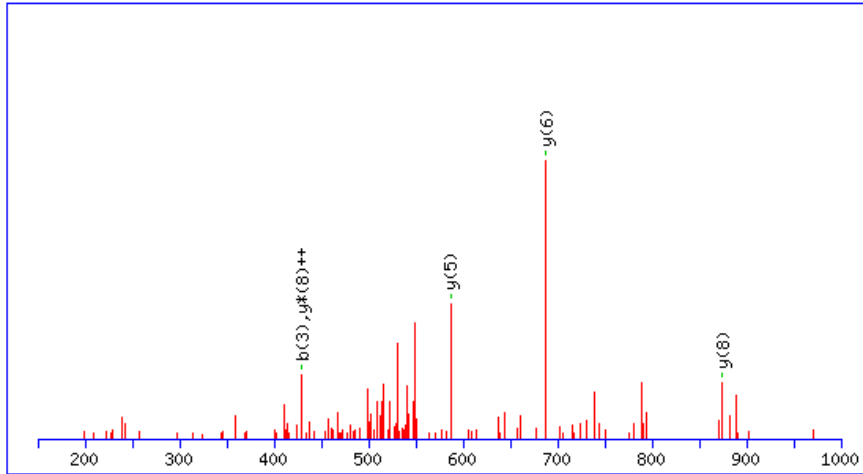

Monoisotopic mass of neutral peptide Mr(calc): 1115.4860

Variable modifications:

K1 : GlyGly (K)

S8 : Phospho (ST), with neutral losses 0.0000 (shown in table), 97.9769

Ions Score: 12 Expect: 10

Matches : 5/140 fragment ions using 8 most intense peaks

| # | b        | b <sup>++</sup> | b <sup>*</sup> | b <sup>+++</sup> | b <sup>0</sup> | b <sup>0++</sup> | Seq. | y        | y <sup>++</sup> | y <sup>*</sup> | y <sup>+++</sup> | y <sup>0</sup> | y <sup>0++</sup> | # |
|---|----------|-----------------|----------------|------------------|----------------|------------------|------|----------|-----------------|----------------|------------------|----------------|------------------|---|
| 1 | 243.1452 | 122.0762        | 226.1186       | 113.5629         |                |                  | K    |          |                 |                |                  |                |                  | 9 |
| 2 | 330.1772 | 165.5922        | 313.1506       | 157.0790         | 312.1666       | 156.5870         | S    | 874.3554 | 437.6813        | 857.3288       | 429.1680         | 856.3448       | 428.6760         | 8 |
| 3 | 429.2456 | 215.1264        | 412.2191       | 206.6132         | 411.2350       | 206.1212         | V    | 787.3233 | 394.1653        | 770.2968       | 385.6520         | 769.3128       | 385.1600         | 7 |
| 4 | 530.2933 | 265.6503        | 513.2667       | 257.1370         | 512.2827       | 256.6450         | T    | 688.2549 | 344.6311        | 671.2284       | 336.1178         | 670.2444       | 335.6258         | 6 |
| 5 | 659.3359 | 330.1716        | 642.3093       | 321.6583         | 641.3253       | 321.1663         | E    | 587.2072 | 294.1073        | 570.1807       | 285.5940         | 569.1967       | 285.1020         | 5 |
| 6 | 716.3573 | 358.6823        | 699.3308       | 350.1690         | 698.3468       | 349.6770         | G    | 458.1647 | 229.5860        | 441.1381       | 221.0727         | 440.1541       | 220.5807         | 4 |
| 7 | 803.3894 | 402.1983        | 786.3628       | 393.6850         | 785.3788       | 393.1930         | S    | 401.1432 | 201.0752        | 384.1166       | 192.5620         | 383.1326       | 192.0700         | 3 |
| 8 | 970.3877 | 485.6975        | 953.3612       | 477.1842         | 952.3772       | 476.6922         | S    | 314.1112 | 157.5592        | 297.0846       | 149.0459         | 296.1006       | 148.5539         | 2 |
| 9 |          |                 |                |                  |                |                  | K    | 147.1128 | 74.0600         | 130.0863       | 65.5468          |                |                  | 1 |

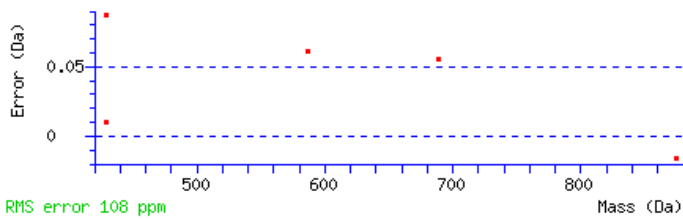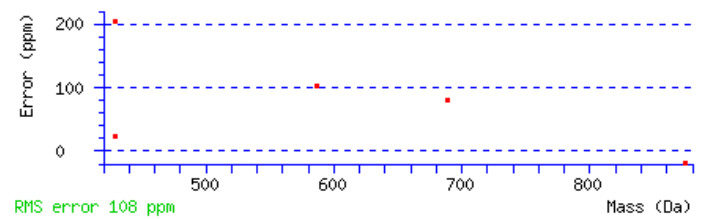

MS/MS Fragmentation of **MDNPSSDPLPSTLSGEEKPLALLPPVPR**

Found in **IPI00121173**, Zinc finger protein 524 (Mus musculus)

Match to Query 73205: 3200.583372 from (1067.868400, 3+) intensity (1185.8872)

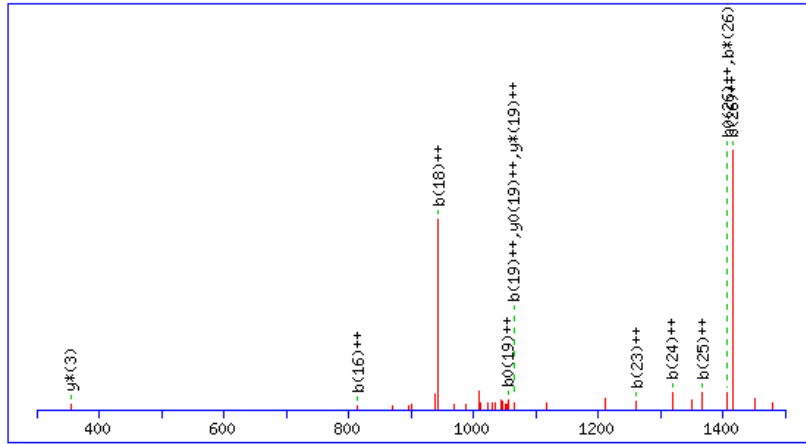

Monoisotopic mass of neutral peptide Mr(calc): 3200.5911

Variable modifications:

N3 : Deamidated (NQ)

K19 : GlyGly (K)

Ions Score: 28 Expect: 0.48

Matches : 13/308 fragment ions using 19 most intense peaks

| #  | b         | b <sup>++</sup> | b <sup>*</sup> | b <sup>+++</sup> | b <sup>0</sup> | b <sup>0++</sup> | Seq. | y         | y <sup>++</sup> | y <sup>*</sup> | y <sup>+++</sup> | y <sup>0</sup> | y <sup>0++</sup> | #  |
|----|-----------|-----------------|----------------|------------------|----------------|------------------|------|-----------|-----------------|----------------|------------------|----------------|------------------|----|
| 1  | 132.0478  | 66.5275         |                |                  |                |                  | M    |           |                 |                |                  |                |                  | 29 |
| 2  | 247.0747  | 124.0410        |                |                  | 229.0641       | 115.0357         | D    | 3070.5579 | 1535.7826       | 3053.5314      | 1527.2693        | 3052.5473      | 1526.7773        | 28 |
| 3  | 362.1016  | 181.5545        | 345.0751       | 173.0412         | 344.0911       | 172.5492         | N    | 2955.5310 | 1478.2691       | 2938.5044      | 1469.7558        | 2937.5204      | 1469.2638        | 27 |
| 4  | 459.1544  | 230.0808        | 442.1279       | 221.5676         | 441.1438       | 221.0756         | P    | 2840.5040 | 1420.7556       | 2823.4775      | 1412.2424        | 2822.4934      | 1411.7504        | 26 |
| 5  | 546.1864  | 273.5969        | 529.1599       | 265.0836         | 528.1759       | 264.5916         | S    | 2743.4513 | 1372.2293       | 2726.4247      | 1363.7160        | 2725.4407      | 1363.2240        | 25 |
| 6  | 633.2185  | 317.1129        | 616.1919       | 308.5996         | 615.2079       | 308.1076         | S    | 2656.4192 | 1328.7132       | 2639.3927      | 1320.2000        | 2638.4087      | 1319.7080        | 24 |
| 7  | 748.2454  | 374.6263        | 731.2189       | 366.1131         | 730.2348       | 365.6211         | D    | 2569.3872 | 1285.1972       | 2552.3606      | 1276.6840        | 2551.3766      | 1276.1920        | 23 |
| 8  | 845.2982  | 423.1527        | 828.2716       | 414.6395         | 827.2876       | 414.1474         | P    | 2454.3603 | 1227.6838       | 2437.3337      | 1219.1705        | 2436.3497      | 1218.6785        | 22 |
| 9  | 958.3822  | 479.6948        | 941.3557       | 471.1815         | 940.3717       | 470.6895         | L    | 2357.3075 | 1179.1574       | 2340.2809      | 1170.6441        | 2339.2969      | 1170.1521        | 21 |
| 10 | 1055.4350 | 528.2211        | 1038.4085      | 519.7079         | 1037.4244      | 519.2159         | P    | 2244.2234 | 1122.6154       | 2227.1969      | 1114.1021        | 2226.2129      | 1113.6101        | 20 |
| 11 | 1142.4670 | 571.7372        | 1125.4405      | 563.2239         | 1124.4565      | 562.7319         | S    | 2147.1707 | 1074.0890       | 2130.1441      | 1065.5757        | 2129.1601      | 1065.0837        | 19 |
| 12 | 1243.5147 | 622.2610        | 1226.4882      | 613.7477         | 1225.5041      | 613.2557         | T    | 2060.1386 | 1030.5730       | 2043.1121      | 1022.0597        | 2042.1281      | 1021.5677        | 18 |
| 13 | 1356.5988 | 678.8030        | 1339.5722      | 670.2898         | 1338.5882      | 669.7977         | L    | 1959.0910 | 980.0491        | 1942.0644      | 971.5358         | 1941.0804      | 971.0438         | 17 |
| 14 | 1443.6308 | 722.3190        | 1426.6043      | 713.8058         | 1425.6202      | 713.3138         | S    | 1846.0069 | 923.5071        | 1828.9803      | 914.9938         | 1827.9963      | 914.5018         | 16 |
| 15 | 1500.6523 | 750.8298        | 1483.6257      | 742.3165         | 1482.6417      | 741.8245         | G    | 1758.9749 | 879.9911        | 1741.9483      | 871.4778         | 1740.9643      | 870.9858         | 15 |
| 16 | 1629.6949 | 815.3511        | 1612.6683      | 806.8378         | 1611.6843      | 806.3458         | E    | 1701.9534 | 851.4803        | 1684.9268      | 842.9671         | 1683.9428      | 842.4751         | 14 |
| 17 | 1758.7375 | 879.8724        | 1741.7109      | 871.3591         | 1740.7269      | 870.8671         | E    | 1572.9108 | 786.9590        | 1555.8843      | 778.4458         | 1554.9002      | 777.9538         | 13 |
| 18 | 1887.7800 | 944.3937        | 1870.7535      | 935.8804         | 1869.7695      | 935.3884         | E    | 1443.8682 | 722.4377        | 1426.8417      | 713.9245         | 1425.8576      | 713.4325         | 12 |
| 19 | 2129.9179 | 1065.4626       | 2112.8914      | 1056.9493        | 2111.9074      | 1056.4573        | K    | 1314.8256 | 657.9164        | 1297.7991      | 649.4032         |                |                  | 11 |
| 20 | 2226.9707 | 1113.9890       | 2209.9441      | 1105.4757        | 2208.9601      | 1104.9837        | P    | 1072.6877 | 536.8475        | 1055.6612      | 528.3342         |                |                  | 10 |
| 21 | 2340.0548 | 1170.5310       | 2323.0282      | 1162.0177        | 2322.0442      | 1161.5257        | L    | 975.6350  | 488.3211        | 958.6084       | 479.8078         |                |                  | 9  |
| 22 | 2411.0919 | 1206.0496       | 2394.0653      | 1197.5363        | 2393.0813      | 1197.0443        | A    | 862.5509  | 431.7791        | 845.5244       | 423.2658         |                |                  | 8  |
| 23 | 2524.1759 | 1262.5916       | 2507.1494      | 1254.0783        | 2506.1654      | 1253.5863        | L    | 791.5138  | 396.2605        | 774.4872       | 387.7473         |                |                  | 7  |
| 24 | 2637.2600 | 1319.1336       | 2620.2335      | 1310.6204        | 2619.2494      | 1310.1284        | L    | 678.4297  | 339.7185        | 661.4032       | 331.2052         |                |                  | 6  |
| 25 | 2734.3128 | 1367.6600       | 2717.2862      | 1359.1467        | 2716.3022      | 1358.6547        | P    | 565.3457  | 283.1765        | 548.3191       | 274.6632         |                |                  | 5  |
| 26 | 2831.3655 | 1416.1864       | 2814.3390      | 1407.6731        | 2813.3550      | 1407.1811        | P    | 468.2929  | 234.6501        | 451.2663       | 226.1368         |                |                  | 4  |
| 27 | 2930.4339 | 1465.7206       | 2913.4074      | 1457.2073        | 2912.4234      | 1456.7153        | V    | 371.2401  | 186.1237        | 354.2136       | 177.6104         |                |                  | 3  |
| 28 | 3027.4867 | 1514.2470       | 3010.4602      | 1505.7337        | 3009.4761      | 1505.2417        | P    | 272.1717  | 136.5895        | 255.1452       | 128.0762         |                |                  | 2  |
| 29 |           |                 |                |                  |                |                  | R    | 175.1190  | 88.0631         | 158.0924       | 79.5498          |                |                  | 1  |

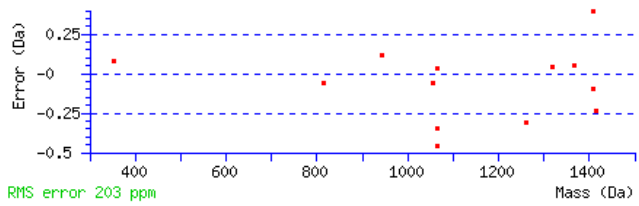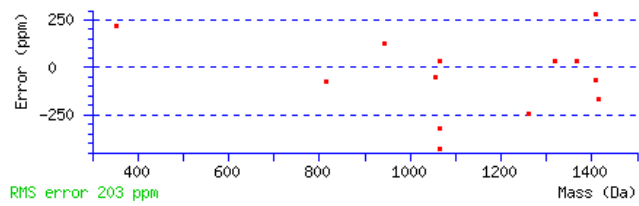

# MS/MS Fragmentation of **SLIGKK**

Found in **IPI00124049**, Four and a half LIM domains protein 5 (Mus musculus)

Match to Query 1571: 758.466868 from (380.240710, 2+) intensity (2867.9771)

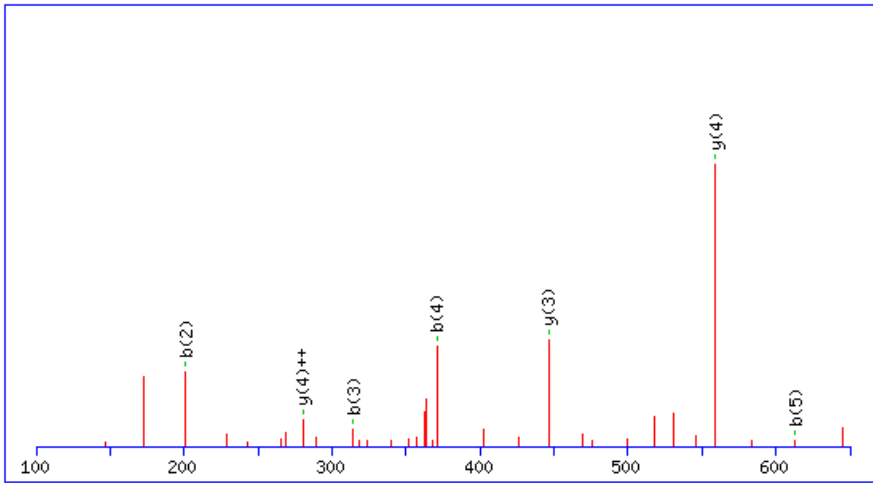

Monoisotopic mass of neutral peptide Mr(calc): 758.4650

Variable modifications:

K5 : GlyGly (K)

Ions Score: 24 Expect: 0.25

Matches : 7/42 fragment ions using 15 most intense peaks

| # | b               | b <sup>++</sup> | b <sup>*</sup> | b <sup>+++</sup> | b <sup>0</sup> | b <sup>0++</sup> | Seq. | y               | y <sup>++</sup> | y <sup>*</sup> | y <sup>+++</sup> | # |
|---|-----------------|-----------------|----------------|------------------|----------------|------------------|------|-----------------|-----------------|----------------|------------------|---|
| 1 | 88.0393         | 44.5233         |                |                  | 70.0287        | 35.5180          | S    |                 |                 |                |                  | 6 |
| 2 | <b>201.1234</b> | 101.0653        |                |                  | 183.1128       | 92.0600          | L    | 672.4403        | 336.7238        | 655.4137       | 328.2105         | 5 |
| 3 | <b>314.2074</b> | 157.6074        |                |                  | 296.1969       | 148.6021         | I    | <b>559.3562</b> | <b>280.1817</b> | 542.3297       | 271.6685         | 4 |
| 4 | <b>371.2289</b> | 186.1181        |                |                  | 353.2183       | 177.1128         | G    | <b>446.2722</b> | 223.6397        | 429.2456       | 215.1264         | 3 |
| 5 | <b>613.3668</b> | 307.1870        | 596.3402       | 298.6738         | 595.3562       | 298.1817         | K    | 389.2507        | 195.1290        | 372.2241       | 186.6157         | 2 |
| 6 |                 |                 |                |                  |                |                  | K    | 147.1128        | 74.0600         | 130.0863       | 65.5468          | 1 |

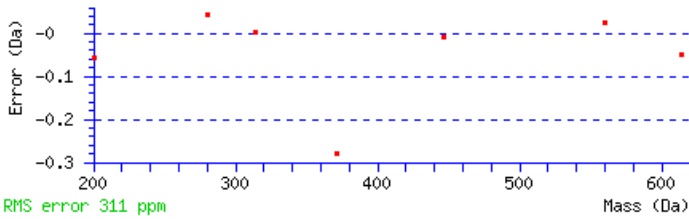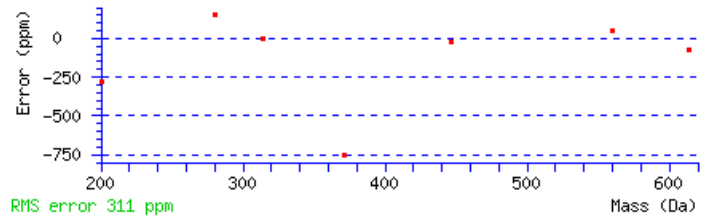

MS/MS Fragmentation of **KTLVAFPQK**

Found in **IPI00128285**, Putative uncharacterized protein (Mus musculus)

Match to Query 18041: 1145.648928 from (573.831740, 2+) intensity (2066.5100)

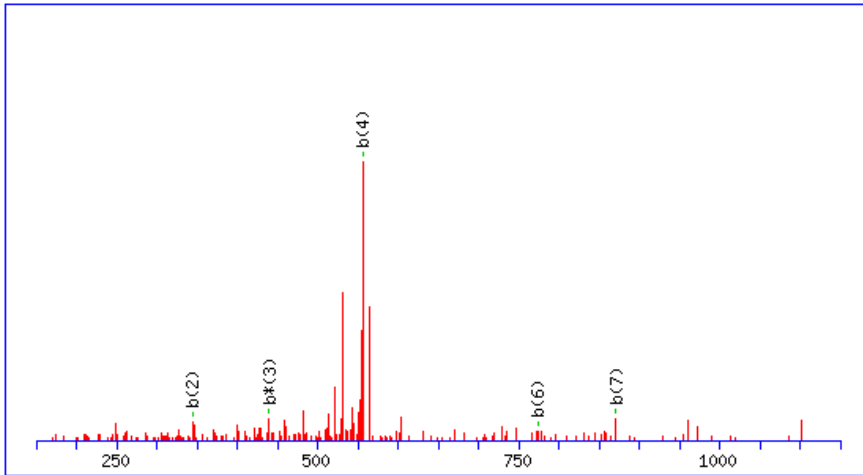

Monoisotopic mass of neutral peptide Mr(calc): 1145.6444

Variable modifications:

K1 : GlyGly (K)

Q8 : Deamidated (NQ)

Ions Score: 18 Expect: 0.84

Matches : 5/80 fragment ions using 10 most intense peaks

| # | b               | b <sup>++</sup> | b <sup>*</sup>  | b <sup>+++</sup> | b <sup>0</sup> | b <sup>0++</sup> | Seq.     | y        | y <sup>++</sup> | y <sup>*</sup> | y <sup>+++</sup> | y <sup>0</sup> | y <sup>0++</sup> | # |
|---|-----------------|-----------------|-----------------|------------------|----------------|------------------|----------|----------|-----------------|----------------|------------------|----------------|------------------|---|
| 1 | 243.1452        | 122.0762        | 226.1186        | 113.5629         |                |                  | <b>K</b> |          |                 |                |                  |                |                  | 9 |
| 2 | <b>344.1928</b> | 172.6001        | 327.1663        | 164.0868         | 326.1823       | 163.5948         | <b>T</b> | 904.5138 | 452.7606        | 887.4873       | 444.2473         | 886.5033       | 443.7553         | 8 |
| 3 | 457.2769        | 229.1421        | <b>440.2504</b> | 220.6288         | 439.2663       | 220.1368         | <b>L</b> | 803.4662 | 402.2367        | 786.4396       | 393.7234         |                |                  | 7 |
| 4 | <b>556.3453</b> | 278.6763        | 539.3188        | 270.1630         | 538.3348       | 269.6710         | <b>V</b> | 690.3821 | 345.6947        | 673.3556       | 337.1814         |                |                  | 6 |
| 5 | 627.3824        | 314.1949        | 610.3559        | 305.6816         | 609.3719       | 305.1896         | <b>A</b> | 591.3137 | 296.1605        | 574.2871       | 287.6472         |                |                  | 5 |
| 6 | <b>774.4509</b> | 387.7291        | 757.4243        | 379.2158         | 756.4403       | 378.7238         | <b>F</b> | 520.2766 | 260.6419        | 503.2500       | 252.1287         |                |                  | 4 |
| 7 | <b>871.5036</b> | 436.2554        | 854.4771        | 427.7422         | 853.4931       | 427.2502         | <b>P</b> | 373.2082 | 187.1077        | 356.1816       | 178.5944         |                |                  | 3 |
| 8 | 1000.5462       | 500.7767        | 983.5197        | 492.2635         | 982.5356       | 491.7715         | <b>Q</b> | 276.1554 | 138.5813        | 259.1288       | 130.0681         |                |                  | 2 |
| 9 |                 |                 |                 |                  |                |                  | <b>K</b> | 147.1128 | 74.0600         | 130.0863       | 65.5468          |                |                  | 1 |

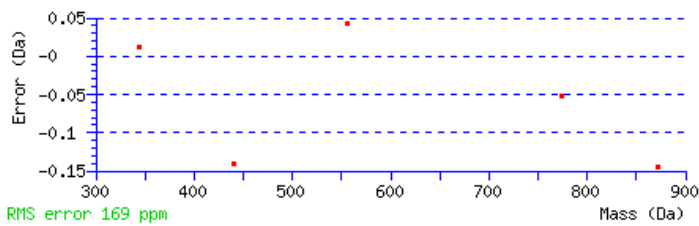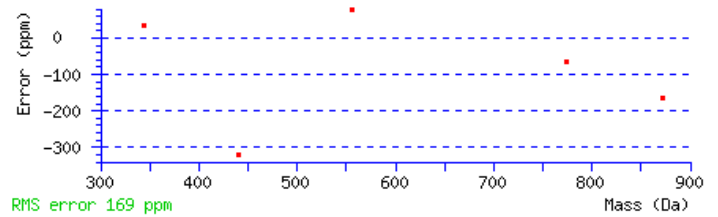

MS/MS Fragmentation of **GSSTGRP KAAASEGVQVK**

Found in **IPI00131063**, Isoform A of Methyl-CpG-binding protein 2 (Mus musculus)

Match to Query 55994: 1893.901092 from (632.307640, 3+) intensity (4713.4600)

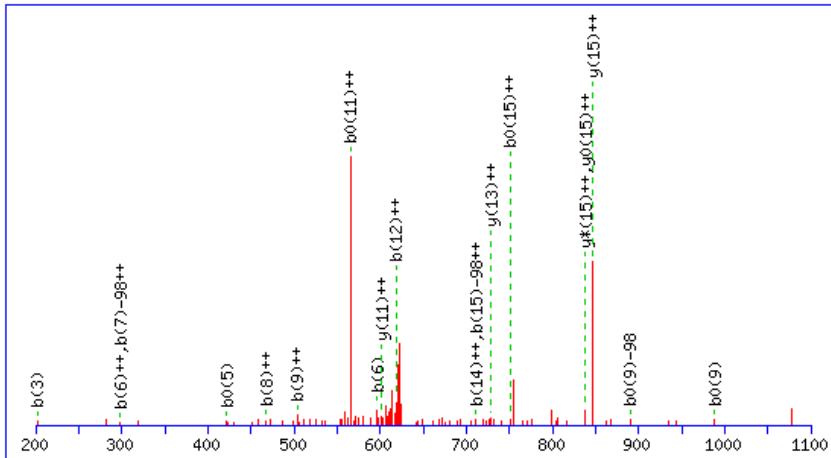

Monoisotopic mass of neutral peptide  $M_r(\text{calc})$ : 1893.8945

Variable modifications:

T4 : Phospho (ST), with neutral losses 0.0000 (shown in table), 97.9769

K8 : GlyGly (K)

Q16 : Deamidated (NQ)

Ions Score: 19 Expect: 4.2

Matches : 19/280 fragment ions using 33 most intense peaks

| #  | b               | b <sup>++</sup> | b <sup>*</sup> | b <sup>+++</sup> | b <sup>0</sup>  | b <sup>0++</sup> | Seq. | y         | y <sup>++</sup> | y <sup>*</sup> | y <sup>+++</sup> | y <sup>0</sup> | y <sup>0++</sup> | #  |
|----|-----------------|-----------------|----------------|------------------|-----------------|------------------|------|-----------|-----------------|----------------|------------------|----------------|------------------|----|
| 1  | 58.0287         | 29.5180         |                |                  |                 |                  | G    |           |                 |                |                  |                |                  | 18 |
| 2  | 145.0608        | 73.0340         |                |                  | 127.0502        | 64.0287          | S    | 1837.8804 | 919.4438        | 1820.8538      | 910.9306         | 1819.8698      | 910.4385         | 17 |
| 3  | <b>202.0822</b> | 101.5448        |                |                  | 184.0717        | 92.5395          | G    | 1750.8484 | 875.9278        | 1733.8218      | 867.4145         | 1732.8378      | 866.9225         | 16 |
| 4  | 383.0962        | 192.0518        |                |                  | 365.0857        | 183.0465         | T    | 1693.8269 | <b>847.4171</b> | 1676.8003      | <b>838.9038</b>  | 1675.8163      | <b>838.4118</b>  | 15 |
| 5  | 440.1177        | 220.5625        |                |                  | <b>422.1071</b> | 211.5572         | G    | 1512.8129 | 756.9101        | 1495.7863      | 748.3968         | 1494.8023      | 747.9048         | 14 |
| 6  | <b>596.2188</b> | <b>298.6130</b> | 579.1923       | 290.0998         | 578.2083        | 289.6078         | R    | 1455.7914 | <b>728.3993</b> | 1438.7649      | 719.8861         | 1437.7809      | 719.3941         | 13 |
| 7  | 693.2716        | 347.1394        | 676.2450       | 338.6262         | 675.2610        | 338.1341         | P    | 1299.6903 | 650.3488        | 1282.6638      | 641.8355         | 1281.6797      | 641.3435         | 12 |
| 8  | 935.4095        | <b>468.2084</b> | 918.3829       | 459.6951         | 917.3989        | 459.2031         | K    | 1202.6375 | <b>601.8224</b> | 1185.6110      | 593.3091         | 1184.6270      | 592.8171         | 11 |
| 9  | 1006.4466       | <b>503.7269</b> | 989.4200       | 495.2137         | <b>988.4360</b> | 494.7216         | A    | 960.4997  | 480.7535        | 943.4731       | 472.2402         | 942.4891       | 471.7482         | 10 |
| 10 | 1077.4837       | 539.2455        | 1060.4572      | 530.7322         | 1059.4731       | 530.2402         | A    | 889.4625  | 445.2349        | 872.4360       | 436.7216         | 871.4520       | 436.2296         | 9  |
| 11 | 1148.5208       | 574.7640        | 1131.4943      | 566.2508         | 1130.5102       | <b>565.7588</b>  | A    | 818.4254  | 409.7164        | 801.3989       | 401.2031         | 800.4149       | 400.7111         | 8  |
| 12 | 1235.5528       | <b>618.2801</b> | 1218.5263      | 609.7668         | 1217.5423       | 609.2748         | S    | 747.3883  | 374.1978        | 730.3618       | 365.6845         | 729.3777       | 365.1925         | 7  |
| 13 | 1364.5954       | 682.8014        | 1347.5689      | 674.2881         | 1346.5849       | 673.7961         | E    | 660.3563  | 330.6818        | 643.3297       | 322.1685         | 642.3457       | 321.6765         | 6  |
| 14 | 1421.6169       | <b>711.3121</b> | 1404.5903      | 702.7988         | 1403.6063       | 702.3068         | G    | 531.3137  | 266.1605        | 514.2871       | 257.6472         |                |                  | 5  |
| 15 | 1520.6853       | 760.8463        | 1503.6588      | 752.3330         | 1502.6747       | <b>751.8410</b>  | V    | 474.2922  | 237.6498        | 457.2657       | 229.1365         |                |                  | 4  |
| 16 | 1649.7279       | 825.3676        | 1632.7014      | 816.8543         | 1631.7173       | 816.3623         | Q    | 375.2238  | 188.1155        | 358.1973       | 179.6023         |                |                  | 3  |
| 17 | 1748.7963       | 874.9018        | 1731.7698      | 866.3885         | 1730.7858       | 865.8965         | V    | 246.1812  | 123.5942        | 229.1547       | 115.0810         |                |                  | 2  |
| 18 |                 |                 |                |                  |                 |                  | K    | 147.1128  | 74.0600         | 130.0863       | 65.5468          |                |                  | 1  |

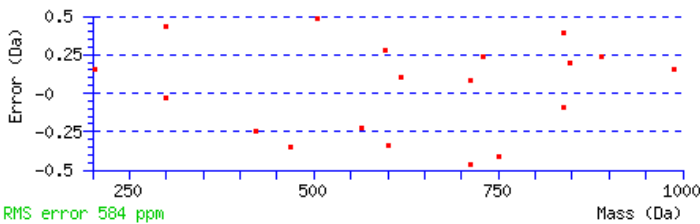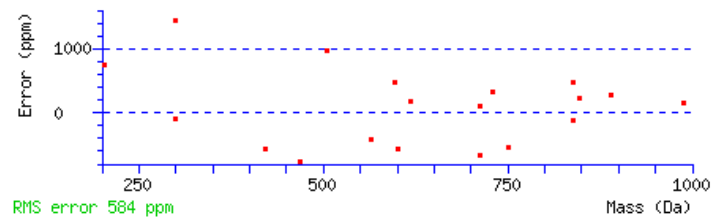



MS/MS Fragmentation of **KICALDDNVCMAFAGLTADAR**

Found in **IPI00131406**, Proteasome subunit alpha type-7 (Mus musculus)

Match to Query 66300: 2311.079772 from (771.367200, 3+) intensity (1362.4364)

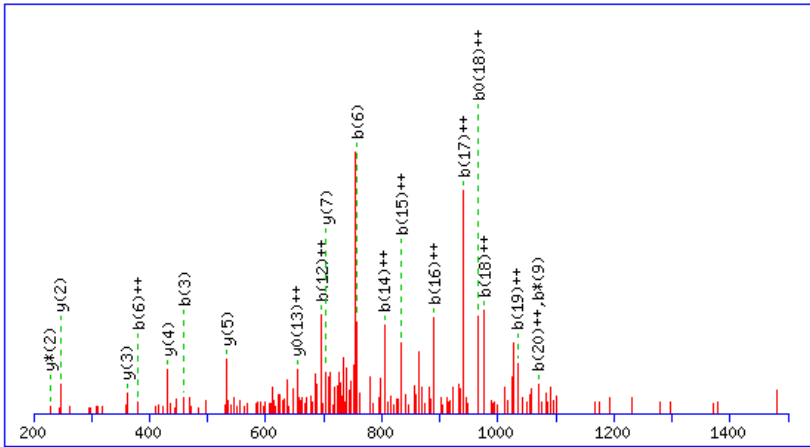

Monoisotopic mass of neutral peptide Mr(calc): 2311.0759

Variable modifications:

K1 : GlyGly (K)

Ions Score: 45 Expect: 0.015

Matches : 20/226 fragment ions using 36 most intense peaks

| #  | b               | b <sup>++</sup>  | b <sup>*</sup>   | b <sup>+++</sup> | b <sup>0</sup> | b <sup>0++</sup> | Seq.     | y               | y <sup>++</sup> | y <sup>*</sup>  | y <sup>+++</sup> | y <sup>0</sup> | y <sup>0++</sup> | #         |
|----|-----------------|------------------|------------------|------------------|----------------|------------------|----------|-----------------|-----------------|-----------------|------------------|----------------|------------------|-----------|
| 1  | 243.1452        | 122.0762         | 226.1186         | 113.5629         |                |                  | <b>K</b> |                 |                 |                 |                  |                |                  | <b>21</b> |
| 2  | 356.2292        | 178.6183         | 339.2027         | 170.1050         |                |                  | <b>I</b> | 2069.9453       | 1035.4763       | 2052.9187       | 1026.9630        | 2051.9347      | 1026.4710        | <b>20</b> |
| 3  | <b>459.2384</b> | 230.1228         | 442.2119         | 221.6096         |                |                  | <b>C</b> | 1956.8612       | 978.9343        | 1939.8347       | 970.4210         | 1938.8507      | 969.9290         | <b>19</b> |
| 4  | 530.2755        | 265.6414         | 513.2490         | 257.1281         |                |                  | <b>A</b> | 1853.8520       | 927.4297        | 1836.8255       | 918.9164         | 1835.8415      | 918.4244         | <b>18</b> |
| 5  | 643.3596        | 322.1834         | 626.3330         | 313.6702         |                |                  | <b>L</b> | 1782.8149       | 891.9111        | 1765.7884       | 883.3978         | 1764.8044      | 882.9058         | <b>17</b> |
| 6  | <b>758.3865</b> | <b>379.6969</b>  | 741.3600         | 371.1836         | 740.3760       | 370.6916         | <b>D</b> | 1669.7309       | 835.3691        | 1652.7043       | 826.8558         | 1651.7203      | 826.3638         | <b>16</b> |
| 7  | 873.4135        | 437.2104         | 856.3869         | 428.6971         | 855.4029       | 428.2051         | <b>D</b> | 1554.7039       | 777.8556        | 1537.6774       | 769.3423         | 1536.6934      | 768.8503         | <b>15</b> |
| 8  | 987.4564        | 494.2318         | 970.4299         | 485.7186         | 969.4458       | 485.2266         | <b>N</b> | 1439.6770       | 720.3421        | 1422.6504       | 711.8289         | 1421.6664      | 711.3368         | <b>14</b> |
| 9  | 1086.5248       | 543.7660         | <b>1069.4983</b> | 535.2528         | 1068.5143      | 534.7608         | <b>V</b> | 1325.6341       | 663.3207        | 1308.6075       | 654.8074         | 1307.6235      | <b>654.3154</b>  | <b>13</b> |
| 10 | 1189.5340       | 595.2706         | 1172.5075        | 586.7574         | 1171.5234      | 586.2654         | <b>C</b> | 1226.5656       | 613.7865        | 1209.5391       | 605.2732         | 1208.5551      | 604.7812         | <b>12</b> |
| 11 | 1320.5745       | 660.7909         | 1303.5479        | 652.2776         | 1302.5639      | 651.7856         | <b>M</b> | 1123.5565       | 562.2819        | 1106.5299       | 553.7686         | 1105.5459      | 553.2766         | <b>11</b> |
| 12 | 1391.6116       | <b>696.3094</b>  | 1374.5851        | 687.7962         | 1373.6010      | 687.3042         | <b>A</b> | 992.5160        | 496.7616        | 975.4894        | 488.2483         | 974.5054       | 487.7563         | <b>10</b> |
| 13 | 1538.6800       | 769.8436         | 1521.6535        | 761.3304         | 1520.6695      | 760.8384         | <b>F</b> | 921.4789        | 461.2431        | 904.4523        | 452.7298         | 903.4683       | 452.2378         | <b>9</b>  |
| 14 | 1609.7171       | <b>805.3622</b>  | 1592.6906        | 796.8489         | 1591.7066      | 796.3569         | <b>A</b> | 774.4104        | 387.7089        | 757.3839        | 379.1956         | 756.3999       | 378.7036         | <b>8</b>  |
| 15 | 1666.7386       | <b>833.8729</b>  | 1649.7120        | 825.3597         | 1648.7280      | 824.8677         | <b>G</b> | <b>703.3733</b> | 352.1903        | 686.3468        | 343.6770         | 685.3628       | 343.1850         | <b>7</b>  |
| 16 | 1779.8227       | <b>890.4150</b>  | 1762.7961        | 881.9017         | 1761.8121      | 881.4097         | <b>L</b> | 646.3519        | 323.6796        | 629.3253        | 315.1663         | 628.3413       | 314.6743         | <b>6</b>  |
| 17 | 1880.8703       | <b>940.9388</b>  | 1863.8438        | 932.4255         | 1862.8598      | 931.9335         | <b>T</b> | <b>533.2678</b> | 267.1375        | 516.2413        | 258.6243         | 515.2572       | 258.1323         | <b>5</b>  |
| 18 | 1951.9075       | <b>976.4574</b>  | 1934.8809        | 967.9441         | 1933.8969      | <b>967.4521</b>  | <b>A</b> | <b>432.2201</b> | 216.6137        | 415.1936        | 208.1004         | 414.2096       | 207.6084         | <b>4</b>  |
| 19 | 2066.9344       | <b>1033.9708</b> | 2049.9078        | 1025.4576        | 2048.9238      | 1024.9656        | <b>D</b> | <b>361.1830</b> | 181.0951        | 344.1565        | 172.5819         | 343.1724       | 172.0899         | <b>3</b>  |
| 20 | 2137.9715       | <b>1069.4894</b> | 2120.9450        | 1060.9761        | 2119.9609      | 1060.4841        | <b>A</b> | <b>246.1561</b> | 123.5817        | <b>229.1295</b> | 115.0684         |                |                  | <b>2</b>  |
| 21 |                 |                  |                  |                  |                |                  | <b>R</b> | 175.1190        | 88.0631         | 158.0924        | 79.5498          |                |                  | <b>1</b>  |

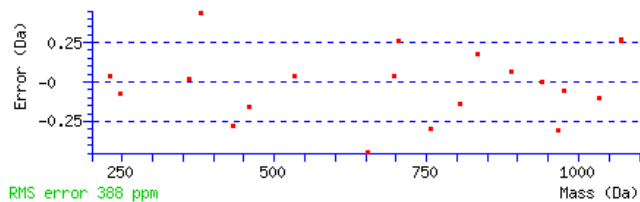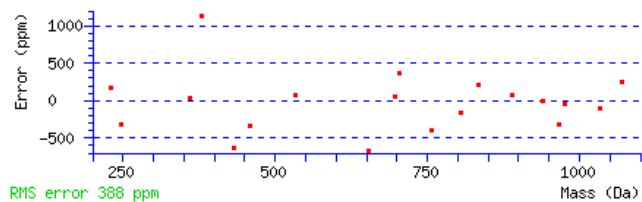



MS/MS Fragmentation of **AQLNIGNVLPVGTMPGEGTIVCCLEEKPGDR**

Found in **IPI00137787**, 60S ribosomal protein L8 (Mus musculus)

Match to Query 73359: 3266.611572 from (1089.877800, 3+) intensity (1493.0007)

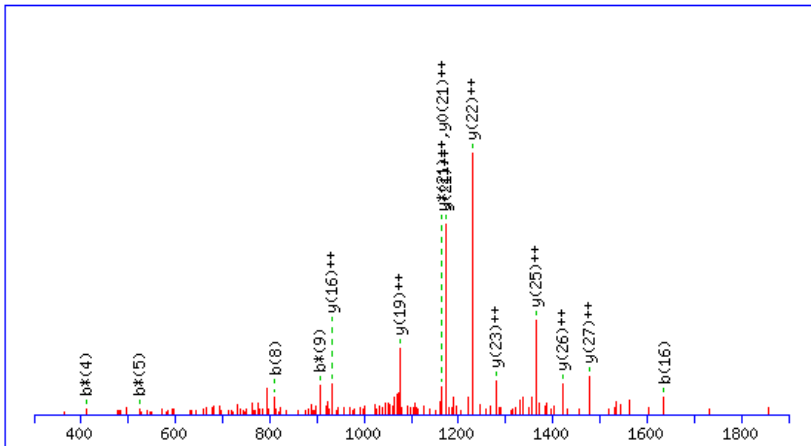

Monoisotopic mass of neutral peptide Mr(calc): 3266.6097

Variable modifications:

K26 : GlyGly (K)

Ions Score: 32 Expect: 0.18

Matches : 15/320 fragment ions using 28 most intense peaks

| #  | b         | b <sup>++</sup> | b <sup>*</sup> | b <sup>+++</sup> | b <sup>0</sup> | b <sup>0++</sup> | Seq. | y         | y <sup>++</sup> | y <sup>*</sup> | y <sup>+++</sup> | y <sup>0</sup> | y <sup>0++</sup> | #  |
|----|-----------|-----------------|----------------|------------------|----------------|------------------|------|-----------|-----------------|----------------|------------------|----------------|------------------|----|
| 1  | 72.0444   | 36.5258         |                |                  |                |                  | A    |           |                 |                |                  |                |                  | 30 |
| 2  | 200.1030  | 100.5551        | 183.0764       | 92.0418          |                |                  | Q    | 3196.5799 | 1598.7936       | 3179.5534      | 1590.2803        | 3178.5694      | 1589.7883        | 29 |
| 3  | 313.1870  | 157.0972        | 296.1605       | 148.5839         |                |                  | L    | 3068.5213 | 1534.7643       | 3051.4948      | 1526.2510        | 3050.5108      | 1525.7590        | 28 |
| 4  | 427.2300  | 214.1186        | 410.2034       | 205.6053         |                |                  | N    | 2955.4373 | 1478.2223       | 2938.4107      | 1469.7090        | 2937.4267      | 1469.2170        | 27 |
| 5  | 540.3140  | 270.6606        | 523.2875       | 262.1474         |                |                  | I    | 2841.3943 | 1421.2008       | 2824.3678      | 1412.6875        | 2823.3838      | 1412.1955        | 26 |
| 6  | 597.3355  | 299.1714        | 580.3089       | 290.6581         |                |                  | G    | 2728.3103 | 1364.6588       | 2711.2837      | 1356.1455        | 2710.2997      | 1355.6535        | 25 |
| 7  | 711.3784  | 356.1928        | 694.3519       | 347.6796         |                |                  | N    | 2671.2888 | 1336.1480       | 2654.2623      | 1327.6348        | 2653.2783      | 1327.1428        | 24 |
| 8  | 810.4468  | 405.7271        | 793.4203       | 397.2138         |                |                  | V    | 2557.2459 | 1279.1266       | 2540.2193      | 1270.6133        | 2539.2353      | 1270.1213        | 23 |
| 9  | 923.5309  | 462.2691        | 906.5043       | 453.7558         |                |                  | L    | 2458.1775 | 1229.5924       | 2441.1509      | 1221.0791        | 2440.1669      | 1220.5871        | 22 |
| 10 | 1020.5837 | 510.7955        | 1003.5571      | 502.2822         |                |                  | P    | 2345.0934 | 1173.0503       | 2328.0669      | 1164.5371        | 2327.0829      | 1164.0451        | 21 |
| 11 | 1119.6521 | 560.3297        | 1102.6255      | 551.8164         |                |                  | V    | 2248.0407 | 1124.5240       | 2231.0141      | 1116.0107        | 2230.0301      | 1115.5187        | 20 |
| 12 | 1176.6735 | 588.8404        | 1159.6470      | 580.3271         |                |                  | G    | 2148.9722 | 1074.9898       | 2131.9457      | 1066.4765        | 2130.9617      | 1065.9845        | 19 |
| 13 | 1277.7212 | 639.3642        | 1260.6947      | 630.8510         | 1259.7106      | 630.3590         | T    | 2091.9508 | 1046.4790       | 2074.9242      | 1037.9658        | 2073.9402      | 1037.4737        | 18 |
| 14 | 1408.7617 | 704.8845        | 1391.7351      | 696.3712         | 1390.7511      | 695.8792         | M    | 1990.9031 | 995.9552        | 1973.8765      | 987.4419         | 1972.8925      | 986.9499         | 17 |
| 15 | 1505.8145 | 753.4109        | 1488.7879      | 744.8976         | 1487.8039      | 744.4056         | P    | 1859.8626 | 930.4349        | 1842.8361      | 921.9217         | 1841.8520      | 921.4297         | 16 |
| 16 | 1634.8571 | 817.9322        | 1617.8305      | 809.4189         | 1616.8465      | 808.9269         | E    | 1762.8098 | 881.9086        | 1745.7833      | 873.3953         | 1744.7993      | 872.9033         | 15 |
| 17 | 1691.8785 | 846.4429        | 1674.8520      | 837.9296         | 1673.8680      | 837.4376         | G    | 1633.7673 | 817.3873        | 1616.7407      | 808.8740         | 1615.7567      | 808.3820         | 14 |
| 18 | 1792.9262 | 896.9667        | 1775.8996      | 888.4535         | 1774.9156      | 887.9615         | T    | 1576.7458 | 788.8765        | 1559.7192      | 780.3633         | 1558.7352      | 779.8713         | 13 |
| 19 | 1906.0103 | 953.5088        | 1888.9837      | 944.9955         | 1887.9997      | 944.5035         | I    | 1475.6981 | 738.3527        | 1458.6716      | 729.8394         | 1457.6875      | 729.3474         | 12 |
| 20 | 2005.0787 | 1003.0430       | 1988.0521      | 994.5297         | 1987.0681      | 994.0377         | V    | 1362.6140 | 681.8107        | 1345.5875      | 673.2974         | 1344.6035      | 672.8054         | 11 |
| 21 | 2108.0879 | 1054.5476       | 2091.0613      | 1046.0343        | 2090.0773      | 1045.5423        | C    | 1263.5456 | 632.2765        | 1246.5191      | 623.7632         | 1245.5351      | 623.2712         | 10 |
| 22 | 2211.0970 | 1106.0522       | 2194.0705      | 1097.5389        | 2193.0865      | 1097.0469        | C    | 1160.5364 | 580.7719        | 1143.5099      | 572.2586         | 1142.5259      | 571.7666         | 9  |
| 23 | 2324.1811 | 1162.5942       | 2307.1546      | 1154.0809        | 2306.1705      | 1153.5889        | L    | 1057.5273 | 529.2673        | 1040.5007      | 520.7540         | 1039.5167      | 520.2620         | 8  |
| 24 | 2453.2237 | 1227.1155       | 2436.1972      | 1218.6022        | 2435.2131      | 1218.1102        | E    | 944.4432  | 472.7252        | 927.4167       | 464.2120         | 926.4326       | 463.7200         | 7  |
| 25 | 2582.2663 | 1291.6368       | 2565.2397      | 1283.1235        | 2564.2557      | 1282.6315        | E    | 815.4006  | 408.2039        | 798.3741       | 399.6907         | 797.3900       | 399.1987         | 6  |
| 26 | 2824.4042 | 1412.7057       | 2807.3776      | 1404.1925        | 2806.3936      | 1403.7004        | K    | 686.3580  | 343.6826        | 669.3315       | 335.1694         | 668.3474       | 334.6774         | 5  |
| 27 | 2921.4570 | 1461.2321       | 2904.4304      | 1452.7188        | 2903.4464      | 1452.2268        | P    | 444.2201  | 222.6137        | 427.1936       | 214.1004         | 426.2096       | 213.6084         | 4  |
| 28 | 2978.4784 | 1489.7428       | 2961.4519      | 1481.2296        | 2960.4678      | 1480.7376        | G    | 347.1674  | 174.0873        | 330.1408       | 165.5740         | 329.1568       | 165.0820         | 3  |
| 29 | 3093.5054 | 1547.2563       | 3076.4788      | 1538.7430        | 3075.4948      | 1538.2510        | D    | 290.1459  | 145.5766        | 273.1193       | 137.0633         | 272.1353       | 136.5713         | 2  |
| 30 |           |                 |                |                  |                |                  | R    | 175.1190  | 88.0631         | 158.0924       | 79.5498          |                |                  | 1  |

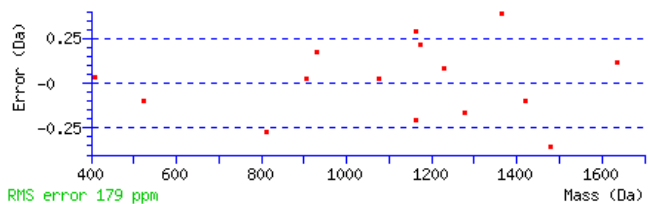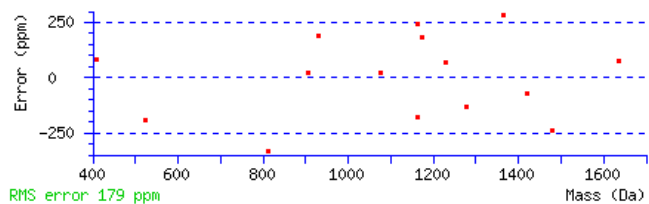

MS/MS Fragmentation of **KNQGDFLSVR**

Found in **IPI00225419**, Isoform 2 of Tyrosine-protein phosphatase non-receptor type 6 (Mus musculus)

Match to Query 35135: 1443.640128 from (722.827340, 2+) intensity (988.7264)

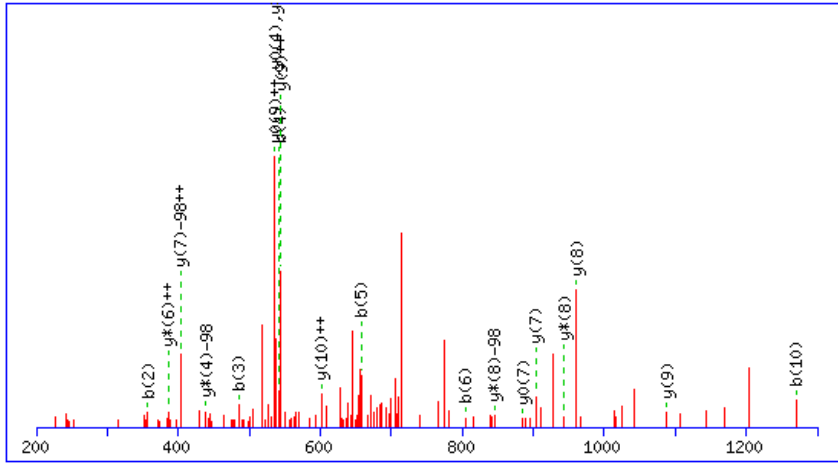

Monoisotopic mass of neutral peptide Mr(calc): 1443.6507

Variable modifications:

K1 : GlyGly (K)

S9 : Phospho (ST), with neutral losses 0.0000 (shown in table), 97.9769

Ions Score: 16 Expect: 7.5

Matches : 20/168 fragment ions using 55 most intense peaks

| #  | b                | b <sup>++</sup> | b <sup>*</sup> | b <sup>+++</sup> | b <sup>0</sup> | b <sup>0++</sup> | Seq. | y                | y <sup>++</sup> | y <sup>*</sup>  | y <sup>+++</sup> | y <sup>0</sup>  | y <sup>0++</sup> | #  |
|----|------------------|-----------------|----------------|------------------|----------------|------------------|------|------------------|-----------------|-----------------|------------------|-----------------|------------------|----|
| 1  | 243.1452         | 122.0762        | 226.1186       | 113.5629         |                |                  | K    |                  |                 |                 |                  |                 |                  | 11 |
| 2  | <b>357.1881</b>  | 179.0977        | 340.1615       | 170.5844         |                |                  | N    | 1202.5201        | <b>601.7637</b> | 1185.4936       | 593.2504         | 1184.5096       | 592.7584         | 10 |
| 3  | <b>485.2467</b>  | 243.1270        | 468.2201       | 234.6137         |                |                  | Q    | <b>1088.4772</b> | <b>544.7422</b> | 1071.4507       | <b>536.2290</b>  | 1070.4667       | <b>535.7370</b>  | 9  |
| 4  | <b>542.2681</b>  | 271.6377        | 525.2416       | 263.1244         |                |                  | G    | <b>960.4186</b>  | 480.7130        | <b>943.3921</b> | 472.1997         | 942.4081        | 471.7077         | 8  |
| 5  | <b>657.2951</b>  | 329.1512        | 640.2685       | 320.6379         | 639.2845       | 320.1459         | D    | <b>903.3972</b>  | 452.2022        | 886.3706        | 443.6890         | <b>885.3866</b> | 443.1969         | 7  |
| 6  | <b>804.3635</b>  | 402.6854        | 787.3369       | 394.1721         | 786.3529       | 393.6801         | F    | 788.3702         | 394.6888        | 771.3437        | <b>386.1755</b>  | 770.3597        | 385.6835         | 6  |
| 7  | 891.3955         | 446.2014        | 874.3690       | 437.6881         | 873.3850       | 437.1961         | S    | 641.3018         | 321.1545        | 624.2753        | 312.6413         | 623.2913        | 312.1493         | 5  |
| 8  | 1004.4796        | 502.7434        | 987.4530       | 494.2302         | 986.4690       | 493.7381         | L    | 554.2698         | 277.6385        | 537.2432        | 269.1253         | <b>536.2592</b> | 268.6333         | 4  |
| 9  | 1171.4779        | 586.2426        | 1154.4514      | 577.7293         | 1153.4674      | 577.2373         | S    | 441.1857         | 221.0965        | 424.1592        | 212.5832         | 423.1752        | 212.0912         | 3  |
| 10 | <b>1270.5464</b> | 635.7768        | 1253.5198      | 627.2635         | 1252.5358      | 626.7715         | V    | 274.1874         | 137.5973        | 257.1608        | 129.0840         |                 |                  | 2  |
| 11 |                  |                 |                |                  |                |                  | R    | 175.1190         | 88.0631         | 158.0924        | 79.5498          |                 |                  | 1  |

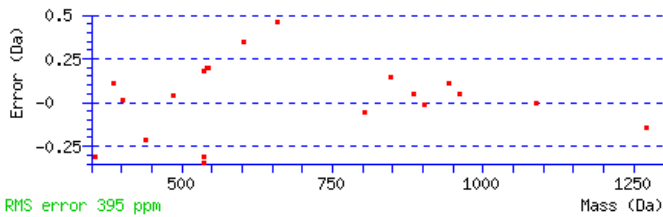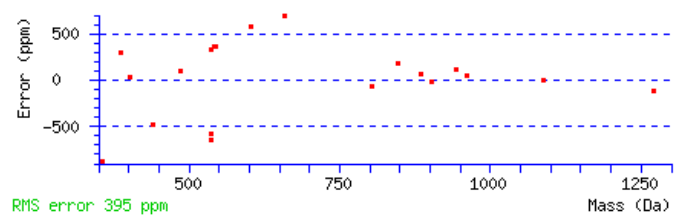

MS/MS Fragmentation of **QAADAEMEKHK**

Found in **IPI00229509**, Isoform PLEC-1I of Plectin-1 (Mus musculus)

Match to Query 31225: 1370.629008 from (686.321780, 2+) intensity (3835.4539)

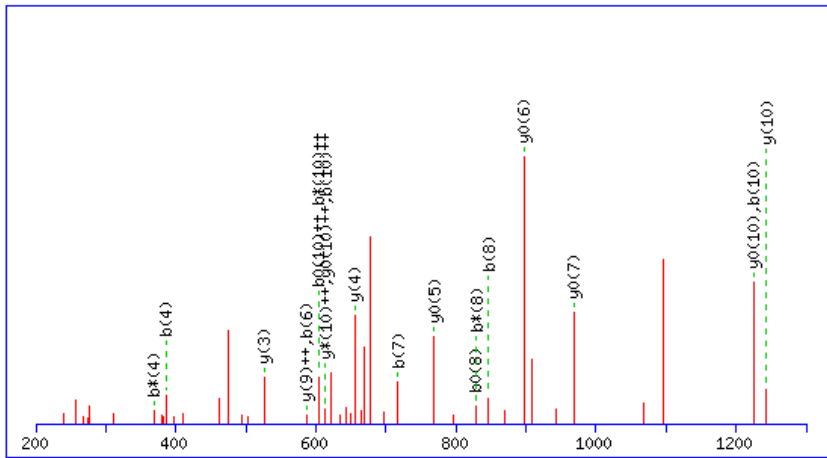

Monoisotopic mass of neutral peptide  $M_r(\text{calc})$ : 1370.6248

Variable modifications:

K9 : GlyGly (K)

Ions Score: 21 Expect: 1.9

Matches : 21/108 fragment ions using 34 most intense peaks

| #  | b         | b <sup>++</sup> | b <sup>*</sup> | b <sup>+++</sup> | b <sup>0</sup> | b <sup>0++</sup> | Seq. | y         | y <sup>++</sup> | y <sup>*</sup> | y <sup>+++</sup> | y <sup>0</sup> | y <sup>0++</sup> | #  |
|----|-----------|-----------------|----------------|------------------|----------------|------------------|------|-----------|-----------------|----------------|------------------|----------------|------------------|----|
| 1  | 129.0659  | 65.0366         | 112.0393       | 56.5233          |                |                  | Q    |           |                 |                |                  |                |                  | 11 |
| 2  | 200.1030  | 100.5551        | 183.0764       | 92.0418          |                |                  | A    | 1243.5736 | 622.2904        | 1226.5470      | 613.7771         | 1225.5630      | 613.2851         | 10 |
| 3  | 271.1401  | 136.0737        | 254.1135       | 127.5604         |                |                  | A    | 1172.5364 | 586.7719        | 1155.5099      | 578.2586         | 1154.5259      | 577.7666         | 9  |
| 4  | 386.1670  | 193.5872        | 369.1405       | 185.0739         | 368.1565       | 184.5819         | D    | 1101.4993 | 551.2533        | 1084.4728      | 542.7400         | 1083.4888      | 542.2480         | 8  |
| 5  | 457.2041  | 229.1057        | 440.1776       | 220.5924         | 439.1936       | 220.1004         | A    | 986.4724  | 493.7398        | 969.4458       | 485.2266         | 968.4618       | 484.7346         | 7  |
| 6  | 586.2467  | 293.6270        | 569.2202       | 285.1137         | 568.2362       | 284.6217         | E    | 915.4353  | 458.2213        | 898.4087       | 449.7080         | 897.4247       | 449.2160         | 6  |
| 7  | 717.2872  | 359.1472        | 700.2607       | 350.6340         | 699.2767       | 350.1420         | M    | 786.3927  | 393.7000        | 769.3661       | 385.1867         | 768.3821       | 384.6947         | 5  |
| 8  | 846.3298  | 423.6685        | 829.3033       | 415.1553         | 828.3192       | 414.6633         | E    | 655.3522  | 328.1797        | 638.3257       | 319.6665         | 637.3416       | 319.1745         | 4  |
| 9  | 1088.4677 | 544.7375        | 1071.4412      | 536.2242         | 1070.4571      | 535.7322         | K    | 526.3096  | 263.6584        | 509.2831       | 255.1452         |                |                  | 3  |
| 10 | 1225.5266 | 613.2669        | 1208.5001      | 604.7537         | 1207.5160      | 604.2617         | H    | 284.1717  | 142.5895        | 267.1452       | 134.0762         |                |                  | 2  |
| 11 |           |                 |                |                  |                |                  | K    | 147.1128  | 74.0600         | 130.0863       | 65.5468          |                |                  | 1  |

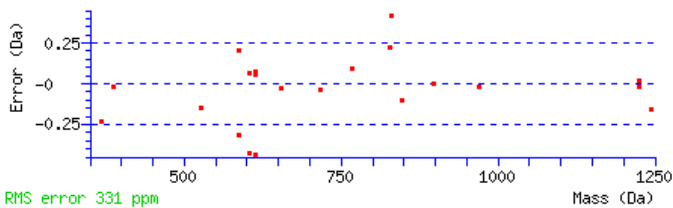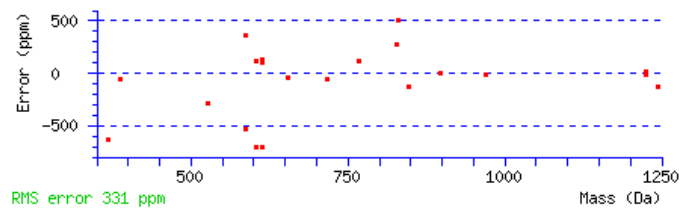



# MS/MS Fragmentation of **QINLQKQPK**

Found in **IPI00229884**, Serine/threonine-protein kinase PAK 2 (Mus musculus)

Match to Query 22095: 1210.673988 from (606.344270, 2+) intensity (2281.3484)

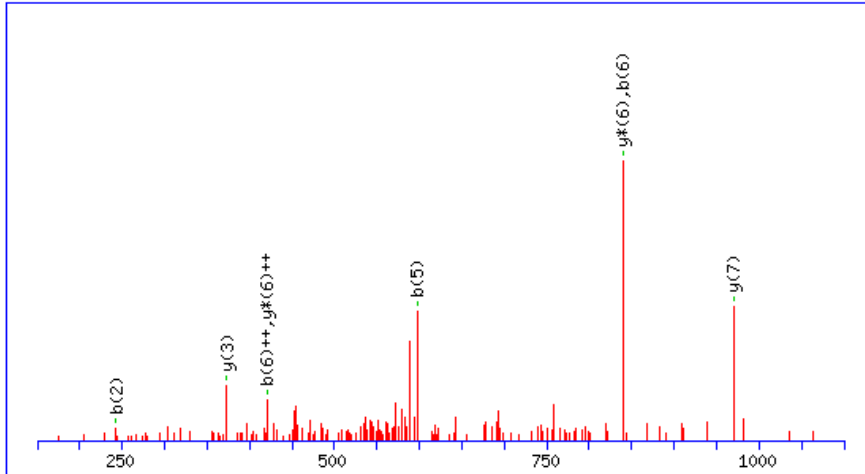

Monoisotopic mass of neutral peptide Mr(calc): 1210.6669

Variable modifications:

K6 : GlyGly (K)

Q7 : Deamidated (NQ)

Ions Score: 16 Expect: 1.5

Matches : 8/64 fragment ions using 9 most intense peaks

| # | b               | b <sup>++</sup> | b <sup>*</sup> | b <sup>+++</sup> | Seq. | y               | y <sup>++</sup> | y <sup>*</sup>  | y <sup>+++</sup> | # |
|---|-----------------|-----------------|----------------|------------------|------|-----------------|-----------------|-----------------|------------------|---|
| 1 | 129.0659        | 65.0366         | 112.0393       | 56.5233          | Q    |                 |                 |                 |                  | 9 |
| 2 | <b>242.1499</b> | 121.5786        | 225.1234       | 113.0653         | I    | 1083.6157       | 542.3115        | 1066.5891       | 533.7982         | 8 |
| 3 | 356.1928        | 178.6001        | 339.1663       | 170.0868         | N    | <b>970.5316</b> | 485.7694        | 953.5051        | 477.2562         | 7 |
| 4 | 469.2769        | 235.1421        | 452.2504       | 226.6288         | L    | 856.4887        | 428.7480        | <b>839.4621</b> | <b>420.2347</b>  | 6 |
| 5 | <b>597.3355</b> | 299.1714        | 580.3089       | 290.6581         | Q    | 743.4046        | 372.2060        | 726.3781        | 363.6927         | 5 |
| 6 | <b>839.4734</b> | <b>420.2403</b> | 822.4468       | 411.7271         | K    | 615.3461        | 308.1767        | 598.3195        | 299.6634         | 4 |
| 7 | 968.5160        | 484.7616        | 951.4894       | 476.2483         | Q    | <b>373.2082</b> | 187.1077        | 356.1816        | 178.5944         | 3 |
| 8 | 1065.5687       | 533.2880        | 1048.5422      | 524.7747         | P    | 244.1656        | 122.5864        | 227.1390        | 114.0731         | 2 |
| 9 |                 |                 |                |                  | K    | 147.1128        | 74.0600         | 130.0863        | 65.5468          | 1 |

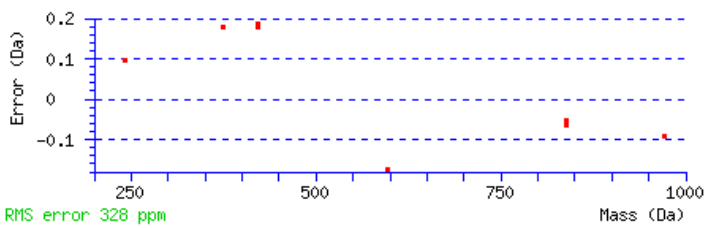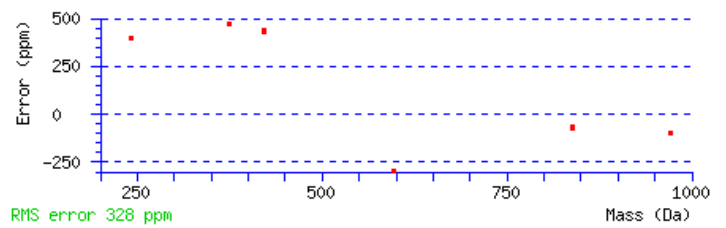



MS/MS Fragmentation of **L<sub>1</sub>S<sub>1</sub>L<sub>1</sub>S<sub>1</sub>Q<sub>1</sub>K<sub>1</sub>L<sub>1</sub>R**

Found in **IPI00331223**, Isoform 1 of Striated muscle-specific serine/threonine-protein kinase (Mus musculus)

Match to Query 24976: 1258.713108 from (630.363830, 2+) intensity (1462.8279)

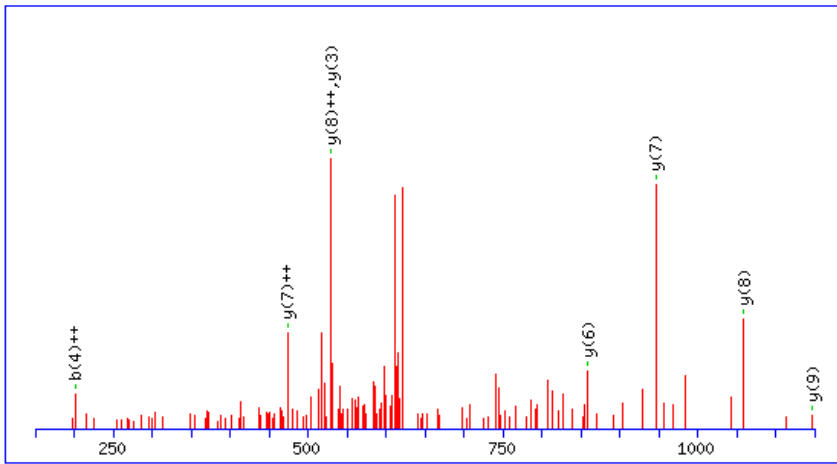

Monoisotopic mass of neutral peptide Mr(calc): 1258.7245

Variable modifications:

Q7 : Deamidated (NQ)

K8 : GlyGly (K)

Ions Score: 34 Expect: 0.019

Matches : 9/86 fragment ions using 10 most intense peaks

| #  | b         | b <sup>++</sup> | b <sup>*</sup> | b <sup>+++</sup> | b <sup>0</sup> | b <sup>0++</sup> | Seq. | y         | y <sup>++</sup> | y <sup>*</sup> | y <sup>+++</sup> | y <sup>0</sup> | y <sup>0++</sup> | #  |
|----|-----------|-----------------|----------------|------------------|----------------|------------------|------|-----------|-----------------|----------------|------------------|----------------|------------------|----|
| 1  | 114.0913  | 57.5493         |                |                  |                |                  | L    |           |                 |                |                  |                |                  | 10 |
| 2  | 201.1234  | 101.0653        |                |                  | 183.1128       | 92.0600          | S    | 1146.6477 | 573.8275        | 1129.6212      | 565.3142         | 1128.6371      | 564.8222         | 9  |
| 3  | 314.2074  | 157.6074        |                |                  | 296.1969       | 148.6021         | L    | 1059.6157 | 530.3115        | 1042.5891      | 521.7982         | 1041.6051      | 521.3062         | 8  |
| 4  | 401.2395  | 201.1234        |                |                  | 383.2289       | 192.1181         | S    | 946.5316  | 473.7694        | 929.5051       | 465.2562         | 928.5211       | 464.7642         | 7  |
| 5  | 514.3235  | 257.6654        |                |                  | 496.3130       | 248.6601         | L    | 859.4996  | 430.2534        | 842.4730       | 421.7402         | 841.4890       | 421.2482         | 6  |
| 6  | 601.3556  | 301.1814        |                |                  | 583.3450       | 292.1761         | S    | 746.4155  | 373.7114        | 729.3890       | 365.1981         | 728.4050       | 364.7061         | 5  |
| 7  | 730.3981  | 365.7027        | 713.3716       | 357.1894         | 712.3876       | 356.6974         | Q    | 659.3835  | 330.1954        | 642.3570       | 321.6821         |                |                  | 4  |
| 8  | 972.5360  | 486.7717        | 955.5095       | 478.2584         | 954.5255       | 477.7664         | K    | 530.3409  | 265.6741        | 513.3144       | 257.1608         |                |                  | 3  |
| 9  | 1085.6201 | 543.3137        | 1068.5936      | 534.8004         | 1067.6095      | 534.3084         | L    | 288.2030  | 144.6051        | 271.1765       | 136.0919         |                |                  | 2  |
| 10 |           |                 |                |                  |                |                  | R    | 175.1190  | 88.0631         | 158.0924       | 79.5498          |                |                  | 1  |

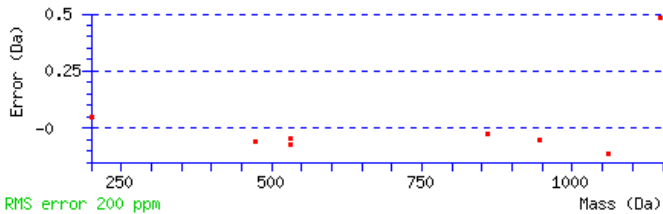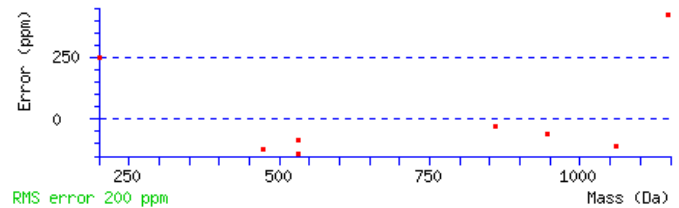

MS/MS Fragmentation of **KPDSEASALKK**

Found in **IPI00345676**, Isoform 1 of Chromodomain-helicase-DNA-binding protein 7 (Mus musculus)

Match to Query 26568: 1286.695288 from (644.354920, 2+) intensity (1686.8608)

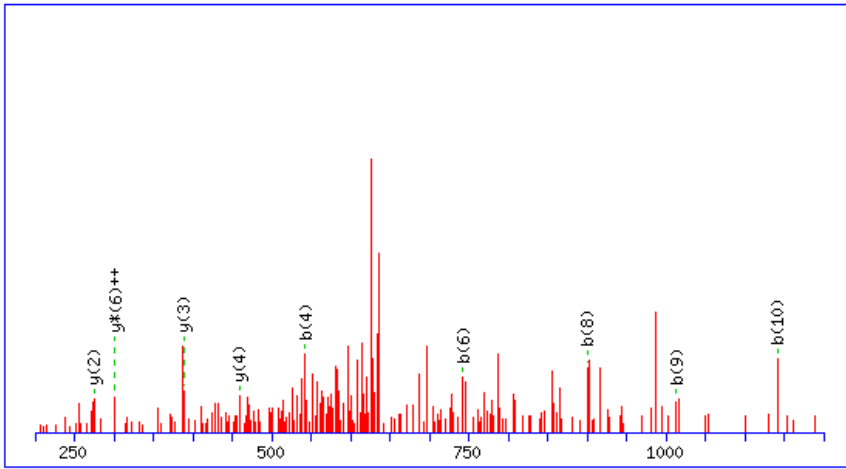

Monoisotopic mass of neutral peptide Mr(calc): 1286.6830

Variable modifications:

K1 : GlyGly (K)

Ions Score: 23 Expect: 0.73

Matches : 9/108 fragment ions using 20 most intense peaks

| #  | b                | b <sup>++</sup> | b <sup>*</sup> | b <sup>+++</sup> | b <sup>0</sup> | b <sup>0++</sup> | Seq. | y               | y <sup>++</sup> | y <sup>*</sup> | y <sup>+++</sup> | y <sup>0</sup> | y <sup>0++</sup> | #  |
|----|------------------|-----------------|----------------|------------------|----------------|------------------|------|-----------------|-----------------|----------------|------------------|----------------|------------------|----|
| 1  | 243.1452         | 122.0762        | 226.1186       | 113.5629         |                |                  | K    |                 |                 |                |                  |                |                  | 11 |
| 2  | 340.1979         | 170.6026        | 323.1714       | 162.0893         |                |                  | P    | 1045.5524       | 523.2798        | 1028.5259      | 514.7666         | 1027.5419      | 514.2746         | 10 |
| 3  | 455.2249         | 228.1161        | 438.1983       | 219.6028         | 437.2143       | 219.1108         | D    | 948.4997        | 474.7535        | 931.4731       | 466.2402         | 930.4891       | 465.7482         | 9  |
| 4  | <b>542.2569</b>  | 271.6321        | 525.2304       | 263.1188         | 524.2463       | 262.6268         | S    | 833.4727        | 417.2400        | 816.4462       | 408.7267         | 815.4621       | 408.2347         | 8  |
| 5  | 671.2995         | 336.1534        | 654.2729       | 327.6401         | 653.2889       | 327.1481         | E    | 746.4407        | 373.7240        | 729.4141       | 365.2107         | 728.4301       | 364.7187         | 7  |
| 6  | <b>742.3366</b>  | 371.6719        | 725.3101       | 363.1587         | 724.3260       | 362.6667         | A    | 617.3981        | 309.2027        | 600.3715       | <b>300.6894</b>  | 599.3875       | 300.1974         | 6  |
| 7  | 829.3686         | 415.1880        | 812.3421       | 406.6747         | 811.3581       | 406.1827         | S    | 546.3610        | 273.6841        | 529.3344       | 265.1709         | 528.3504       | 264.6788         | 5  |
| 8  | <b>900.4058</b>  | 450.7065        | 883.3792       | 442.1932         | 882.3952       | 441.7012         | A    | <b>459.3289</b> | 230.1681        | 442.3024       | 221.6548         |                |                  | 4  |
| 9  | <b>1013.4898</b> | 507.2485        | 996.4633       | 498.7353         | 995.4792       | 498.2433         | L    | <b>388.2918</b> | 194.6496        | 371.2653       | 186.1363         |                |                  | 3  |
| 10 | <b>1141.5848</b> | 571.2960        | 1124.5582      | 562.7828         | 1123.5742      | 562.2907         | K    | <b>275.2078</b> | 138.1075        | 258.1812       | 129.5942         |                |                  | 2  |
| 11 |                  |                 |                |                  |                |                  | K    | 147.1128        | 74.0600         | 130.0863       | 65.5468          |                |                  | 1  |

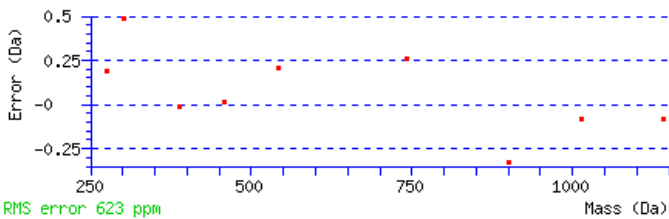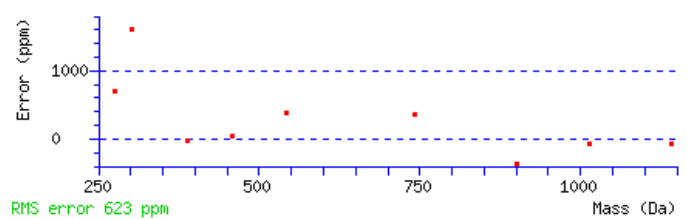

# MS/MS Fragmentation of **KQLDSLLGAK**

Found in **IPI00346834**, Putative uncharacterized protein (Mus musculus)

Match to Query 25363: 1265.627548 from (633.821050, 2+) intensity (1787.2828)

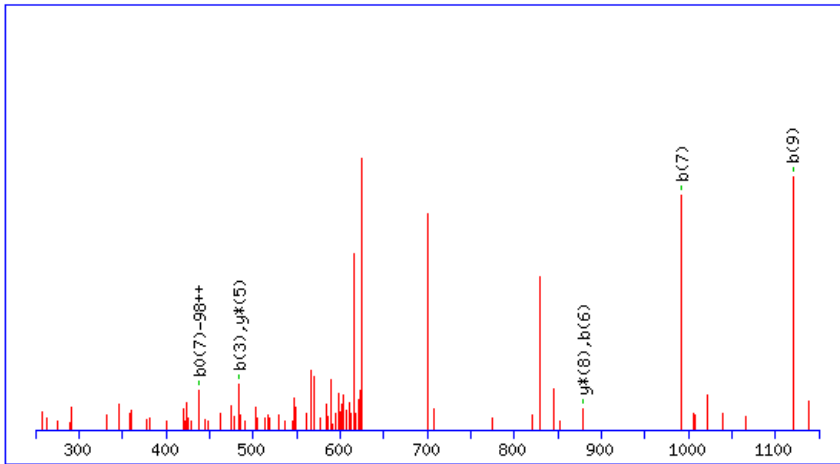

Monoisotopic mass of neutral peptide Mr(calc): 1265.6380

Variable modifications:

K1 : GlyGly (K)

S5 : Phospho (ST), with neutral losses 0.0000 (shown in table), 97.9769

Ions Score: 21 Expect: 1.4

Matches : 7/146 fragment ions using 9 most intense peaks

| #  | b                | b <sup>++</sup> | b <sup>*</sup> | b <sup>+++</sup> | b <sup>0</sup> | b <sup>0++</sup> | Seq. | y         | y <sup>++</sup> | y <sup>*</sup>  | y <sup>+++</sup> | y <sup>0</sup> | y <sup>0++</sup> | #  |
|----|------------------|-----------------|----------------|------------------|----------------|------------------|------|-----------|-----------------|-----------------|------------------|----------------|------------------|----|
| 1  | 243.1452         | 122.0762        | 226.1186       | 113.5629         |                |                  | K    |           |                 |                 |                  |                |                  | 10 |
| 2  | 371.2037         | 186.1055        | 354.1772       | 177.5922         |                |                  | Q    | 1024.5075 | 512.7574        | 1007.4809       | 504.2441         | 1006.4969      | 503.7521         | 9  |
| 3  | <b>484.2878</b>  | 242.6475        | 467.2613       | 234.1343         |                |                  | L    | 896.4489  | 448.7281        | <b>879.4223</b> | 440.2148         | 878.4383       | 439.7228         | 8  |
| 4  | 599.3148         | 300.1610        | 582.2882       | 291.6477         | 581.3042       | 291.1557         | D    | 783.3648  | 392.1860        | 766.3383        | 383.6728         | 765.3542       | 383.1808         | 7  |
| 5  | 766.3131         | 383.6602        | 749.2866       | 375.1469         | 748.3025       | 374.6549         | S    | 668.3379  | 334.6726        | 651.3113        | 326.1593         | 650.3273       | 325.6673         | 6  |
| 6  | <b>879.3972</b>  | 440.2022        | 862.3706       | 431.6890         | 861.3866       | 431.1969         | L    | 501.3395  | 251.1734        | <b>484.3130</b> | 242.6601         |                |                  | 5  |
| 7  | <b>992.4812</b>  | 496.7443        | 975.4547       | 488.2310         | 974.4707       | 487.7390         | L    | 388.2554  | 194.6314        | 371.2289        | 186.1181         |                |                  | 4  |
| 8  | 1049.5027        | 525.2550        | 1032.4762      | 516.7417         | 1031.4921      | 516.2497         | G    | 275.1714  | 138.0893        | 258.1448        | 129.5761         |                |                  | 3  |
| 9  | <b>1120.5398</b> | 560.7735        | 1103.5133      | 552.2603         | 1102.5293      | 551.7683         | A    | 218.1499  | 109.5786        | 201.1234        | 101.0653         |                |                  | 2  |
| 10 |                  |                 |                |                  |                |                  | K    | 147.1128  | 74.0600         | 130.0863        | 65.5468          |                |                  | 1  |

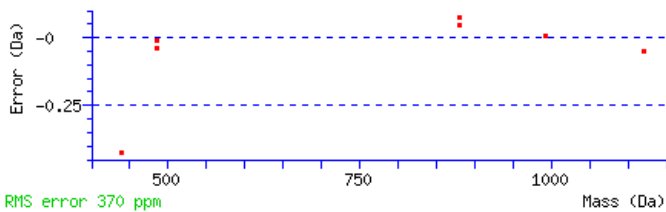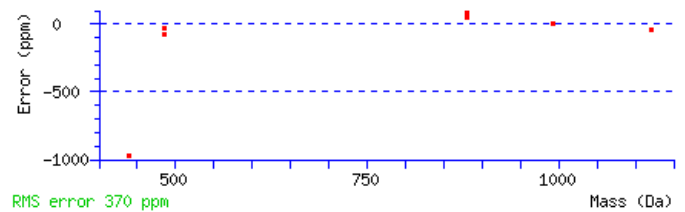

MS/MS Fragmentation of **LCPDVLLKNTSTVDK**

Found in **IPI00354163**, Isoform 1 of Uncharacterized protein C12orf35 homolog (Mus musculus)

Match to Query 53045: 1815.932888 from (908.973720, 2+) intensity (505.8741)

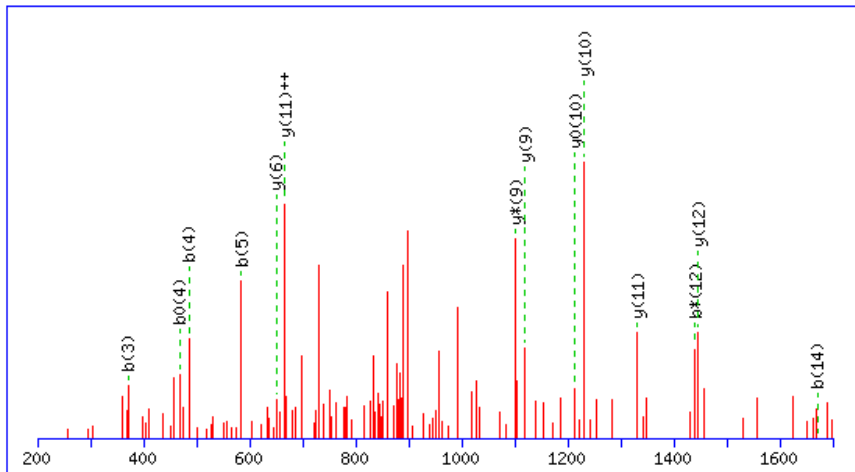

Monoisotopic mass of neutral peptide  $M_r(\text{calc})$ : 1815.9400

Variable modifications:

C2 : Carbamidomethyl (C)

K8 : GlyGly (K)

Ions Score: 19 Expect: 2.3

Matches : 14/146 fragment ions using 30 most intense peaks

| #  | b                | b <sup>++</sup> | b <sup>*</sup>   | b <sup>+++</sup> | b <sup>0</sup>  | b <sup>0++</sup> | Seq. | y                | y <sup>++</sup> | y <sup>*</sup>   | y <sup>+++</sup> | y <sup>0</sup>   | y <sup>0++</sup> | #  |
|----|------------------|-----------------|------------------|------------------|-----------------|------------------|------|------------------|-----------------|------------------|------------------|------------------|------------------|----|
| 1  | 114.0913         | 57.5493         |                  |                  |                 |                  | L    |                  |                 |                  |                  |                  |                  | 15 |
| 2  | 274.1220         | 137.5646        |                  |                  |                 |                  | C    | 1703.8633        | 852.4353        | 1686.8367        | 843.9220         | 1685.8527        | 843.4300         | 14 |
| 3  | <b>371.1748</b>  | 186.0910        |                  |                  |                 |                  | P    | 1543.8326        | 772.4199        | 1526.8061        | 763.9067         | 1525.8220        | 763.4147         | 13 |
| 4  | <b>486.2017</b>  | 243.6045        |                  |                  | <b>468.1911</b> | 234.5992         | D    | <b>1446.7798</b> | 723.8936        | 1429.7533        | 715.3803         | 1428.7693        | 714.8883         | 12 |
| 5  | <b>585.2701</b>  | 293.1387        |                  |                  | 567.2595        | 284.1334         | V    | <b>1331.7529</b> | <b>666.3801</b> | 1314.7264        | 657.8668         | 1313.7423        | 657.3748         | 11 |
| 6  | 698.3542         | 349.6807        |                  |                  | 680.3436        | 340.6754         | L    | <b>1232.6845</b> | 616.8459        | 1215.6579        | 608.3326         | <b>1214.6739</b> | 607.8406         | 10 |
| 7  | 811.4382         | 406.2228        |                  |                  | 793.4277        | 397.2175         | L    | <b>1119.6004</b> | 560.3039        | <b>1102.5739</b> | 551.7906         | 1101.5899        | 551.2986         | 9  |
| 8  | 1053.5761        | 527.2917        | 1036.5496        | 518.7784         | 1035.5656       | 518.2864         | K    | 1006.5164        | 503.7618        | 989.4898         | 495.2485         | 988.5058         | 494.7565         | 8  |
| 9  | 1167.6191        | 584.3132        | 1150.5925        | 575.7999         | 1149.6085       | 575.3079         | N    | 764.3785         | 382.6929        | 747.3519         | 374.1796         | 746.3679         | 373.6876         | 7  |
| 10 | 1268.6667        | 634.8370        | 1251.6402        | 626.3237         | 1250.6562       | 625.8317         | T    | <b>650.3355</b>  | 325.6714        | 633.3090         | 317.1581         | 632.3250         | 316.6661         | 6  |
| 11 | 1355.6988        | 678.3530        | 1338.6722        | 669.8397         | 1337.6882       | 669.3477         | S    | 549.2879         | 275.1476        | 532.2613         | 266.6343         | 531.2773         | 266.1423         | 5  |
| 12 | 1456.7464        | 728.8769        | <b>1439.7199</b> | 720.3636         | 1438.7359       | 719.8716         | T    | 462.2558         | 231.6316        | 445.2293         | 223.1183         | 444.2453         | 222.6263         | 4  |
| 13 | 1555.8149        | 778.4111        | 1538.7883        | 769.8978         | 1537.8043       | 769.4058         | V    | 361.2082         | 181.1077        | 344.1816         | 172.5944         | 343.1976         | 172.1024         | 3  |
| 14 | <b>1670.8418</b> | 835.9245        | 1653.8152        | 827.4113         | 1652.8312       | 826.9193         | D    | 262.1397         | 131.5735        | 245.1132         | 123.0602         | 244.1292         | 122.5682         | 2  |
| 15 |                  |                 |                  |                  |                 |                  | K    | 147.1128         | 74.0600         | 130.0863         | 65.5468          |                  |                  | 1  |

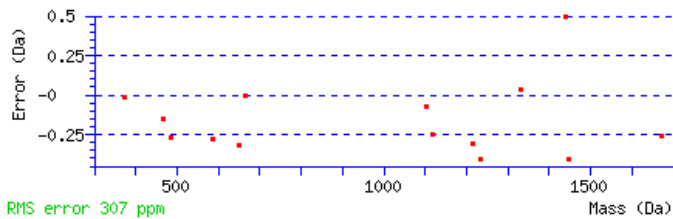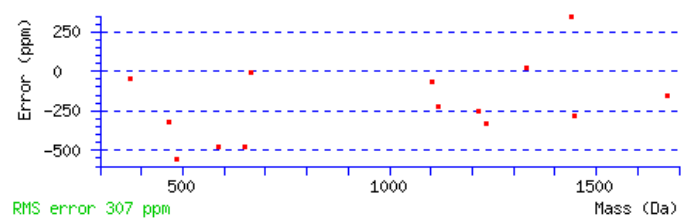

MS/MS Fragmentation of **QMKNLLTLK**

Found in **IPI00380440**, Novel protein (Mus musculus)

Match to Query 21668: 1202.66688 from (602.340620, 2+) intensity (2720.2737)

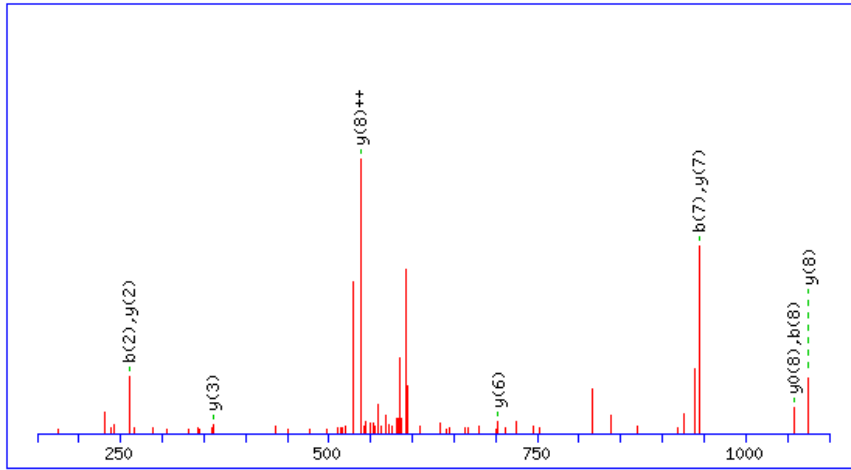

Monoisotopic mass of neutral peptide Mr(calc): 1202.6692

Variable modifications:

K3 : GlyGly (K)

N4 : Deamidated (NQ)

Ions Score: 37 Expect: 0.016

Matches : 10/80 fragment ions using 10 most intense peaks

| # | b                | b <sup>++</sup> | b <sup>*</sup> | b <sup>+++</sup> | b <sup>0</sup> | b <sup>0++</sup> | Seq. | y                | y <sup>++</sup> | y <sup>*</sup> | y <sup>+++</sup> | y <sup>0</sup>   | y <sup>0++</sup> | # |
|---|------------------|-----------------|----------------|------------------|----------------|------------------|------|------------------|-----------------|----------------|------------------|------------------|------------------|---|
| 1 | 129.0659         | 65.0366         | 112.0393       | 56.5233          |                |                  | Q    |                  |                 |                |                  |                  |                  | 9 |
| 2 | <b>260.1063</b>  | 130.5568        | 243.0798       | 122.0435         |                |                  | M    | <b>1075.6180</b> | <b>538.3126</b> | 1058.5914      | 529.7994         | <b>1057.6074</b> | 529.3074         | 8 |
| 3 | 502.2442         | 251.6258        | 485.2177       | 243.1125         |                |                  | K    | <b>944.5775</b>  | 472.7924        | 927.5510       | 464.2791         | 926.5669         | 463.7871         | 7 |
| 4 | 617.2712         | 309.1392        | 600.2446       | 300.6259         |                |                  | N    | <b>702.4396</b>  | 351.7234        | 685.4131       | 343.2102         | 684.4291         | 342.7182         | 6 |
| 5 | 730.3552         | 365.6813        | 713.3287       | 357.1680         |                |                  | L    | 587.4127         | 294.2100        | 570.3861       | 285.6967         | 569.4021         | 285.2047         | 5 |
| 6 | 843.4393         | 422.2233        | 826.4128       | 413.7100         |                |                  | L    | 474.3286         | 237.6679        | 457.3021       | 229.1547         | 456.3180         | 228.6627         | 4 |
| 7 | <b>944.4870</b>  | 472.7471        | 927.4604       | 464.2339         | 926.4764       | 463.7418         | T    | <b>361.2445</b>  | 181.1259        | 344.2180       | 172.6126         | 343.2340         | 172.1206         | 3 |
| 8 | <b>1057.5710</b> | 529.2892        | 1040.5445      | 520.7759         | 1039.5605      | 520.2839         | L    | <b>260.1969</b>  | 130.6021        | 243.1703       | 122.0888         |                  |                  | 2 |
| 9 |                  |                 |                |                  |                |                  | K    | 147.1128         | 74.0600         | 130.0863       | 65.5468          |                  |                  | 1 |

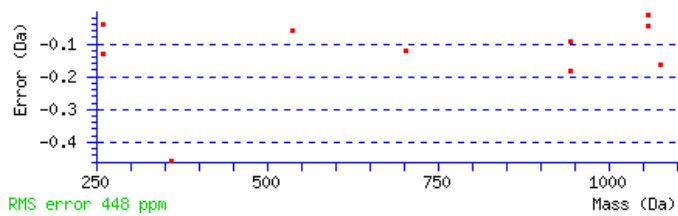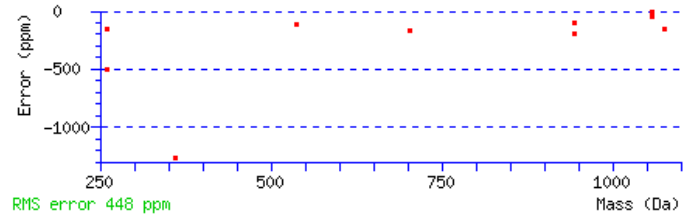

MS/MS Fragmentation of **DIDILNSAGKMDK**

Found in **IPI00396739**, SWI/SNF-related matrix-associated actin-dependent regulator of chromatin subfamily A member 5 (*Mus musculus*)

Match to Query 40212: 1533.745122 from (512.255650, 3+) intensity (2175.5291)

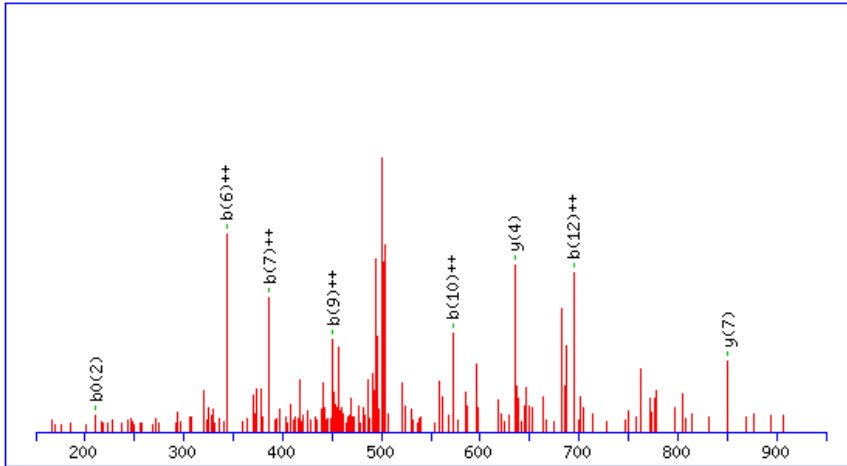

Monoisotopic mass of neutral peptide Mr(calc): 1533.7344

Variable modifications:

N6 : Deamidated (NQ)

K10 : GlyGly (K)

Ions Score: 20 Expect: 2.6

Matches : 8/132 fragment ions using 16 most intense peaks

| #  | b         | b <sup>++</sup> | b <sup>*</sup> | b <sup>+++</sup> | b <sup>0</sup> | b <sup>0++</sup> | Seq. | y         | y <sup>++</sup> | y <sup>*</sup> | y <sup>+++</sup> | y <sup>0</sup> | y <sup>0++</sup> | #  |
|----|-----------|-----------------|----------------|------------------|----------------|------------------|------|-----------|-----------------|----------------|------------------|----------------|------------------|----|
| 1  | 116.0342  | 58.5207         |                |                  | 98.0237        | 49.5155          | D    |           |                 |                |                  |                |                  | 13 |
| 2  | 229.1183  | 115.0628        |                |                  | 211.1077       | 106.0575         | I    | 1419.7148 | 710.3610        | 1402.6883      | 701.8478         | 1401.7042      | 701.3558         | 12 |
| 3  | 344.1452  | 172.5763        |                |                  | 326.1347       | 163.5710         | D    | 1306.6307 | 653.8190        | 1289.6042      | 645.3057         | 1288.6202      | 644.8137         | 11 |
| 4  | 457.2293  | 229.1183        |                |                  | 439.2187       | 220.1130         | I    | 1191.6038 | 596.3055        | 1174.5773      | 587.7923         | 1173.5932      | 587.3003         | 10 |
| 5  | 570.3134  | 285.6603        |                |                  | 552.3028       | 276.6550         | L    | 1078.5197 | 539.7635        | 1061.4932      | 531.2502         | 1060.5092      | 530.7582         | 9  |
| 6  | 685.3403  | 343.1738        | 668.3137       | 334.6605         | 667.3297       | 334.1685         | N    | 965.4357  | 483.2215        | 948.4091       | 474.7082         | 947.4251       | 474.2162         | 8  |
| 7  | 772.3723  | 386.6898        | 755.3458       | 378.1765         | 754.3618       | 377.6845         | S    | 850.4087  | 425.7080        | 833.3822       | 417.1947         | 832.3982       | 416.7027         | 7  |
| 8  | 843.4094  | 422.2084        | 826.3829       | 413.6951         | 825.3989       | 413.2031         | A    | 763.3767  | 382.1920        | 746.3502       | 373.6787         | 745.3661       | 373.1867         | 6  |
| 9  | 900.4309  | 450.7191        | 883.4044       | 442.2058         | 882.4203       | 441.7138         | G    | 692.3396  | 346.6734        | 675.3130       | 338.1602         | 674.3290       | 337.6681         | 5  |
| 10 | 1142.5688 | 571.7880        | 1125.5422      | 563.2748         | 1124.5582      | 562.7828         | K    | 635.3181  | 318.1627        | 618.2916       | 309.6494         | 617.3076       | 309.1574         | 4  |
| 11 | 1273.6093 | 637.3083        | 1256.5827      | 628.7950         | 1255.5987      | 628.3030         | M    | 393.1802  | 197.0938        | 376.1537       | 188.5805         | 375.1697       | 188.0885         | 3  |
| 12 | 1388.6362 | 694.8217        | 1371.6097      | 686.3085         | 1370.6257      | 685.8165         | D    | 262.1397  | 131.5735        | 245.1132       | 123.0602         | 244.1292       | 122.5682         | 2  |
| 13 |           |                 |                |                  |                |                  | K    | 147.1128  | 74.0600         | 130.0863       | 65.5468          |                |                  | 1  |

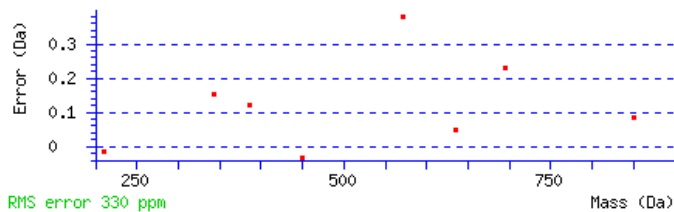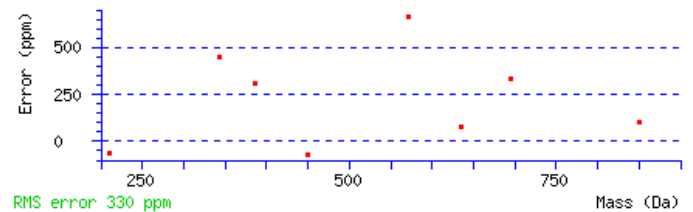



MS/MS Fragmentation of **ISIAWCKR**

Found in **IPI00454114**, DNA topoisomerase 1 mitochondrial (Mus musculus)

Match to Query 14592: 1089.577588 from (545.796070, 2+) intensity (1719.6333)

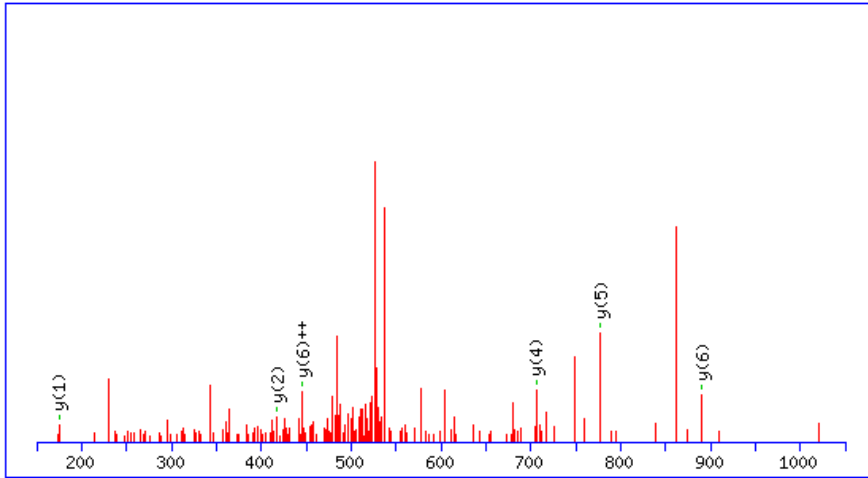

Monoisotopic mass of neutral peptide Mr(calc) : 1089.5753

Variable modifications:

K7 : GlyGly (K)

Ions Score: 19 Expect: 1.5

Matches : 6/58 fragment ions using 17 most intense peaks

| # | b        | b <sup>++</sup> | b <sup>*</sup> | b <sup>*++</sup> | b <sup>0</sup> | b <sup>0++</sup> | Seq. | y               | y <sup>++</sup> | y <sup>*</sup> | y <sup>*++</sup> | y <sup>0</sup> | y <sup>0++</sup> | # |
|---|----------|-----------------|----------------|------------------|----------------|------------------|------|-----------------|-----------------|----------------|------------------|----------------|------------------|---|
| 1 | 114.0913 | 57.5493         |                |                  |                |                  | I    |                 |                 |                |                  |                |                  | 8 |
| 2 | 201.1234 | 101.0653        |                |                  | 183.1128       | 92.0600          | S    | 977.4985        | 489.2529        | 960.4720       | 480.7396         | 959.4880       | 480.2476         | 7 |
| 3 | 314.2074 | 157.6074        |                |                  | 296.1969       | 148.6021         | I    | <b>890.4665</b> | <b>445.7369</b> | 873.4400       | 437.2236         |                |                  | 6 |
| 4 | 385.2445 | 193.1259        |                |                  | 367.2340       | 184.1206         | A    | <b>777.3825</b> | 389.1949        | 760.3559       | 380.6816         |                |                  | 5 |
| 5 | 571.3239 | 286.1656        |                |                  | 553.3133       | 277.1603         | W    | <b>706.3453</b> | 353.6763        | 689.3188       | 345.1630         |                |                  | 4 |
| 6 | 674.3330 | 337.6702        |                |                  | 656.3225       | 328.6649         | C    | 520.2660        | 260.6367        | 503.2395       | 252.1234         |                |                  | 3 |
| 7 | 916.4709 | 458.7391        | 899.4444       | 450.2258         | 898.4604       | 449.7338         | K    | <b>417.2568</b> | 209.1321        | 400.2303       | 200.6188         |                |                  | 2 |
| 8 |          |                 |                |                  |                |                  | R    | <b>175.1190</b> | 88.0631         | 158.0924       | 79.5498          |                |                  | 1 |

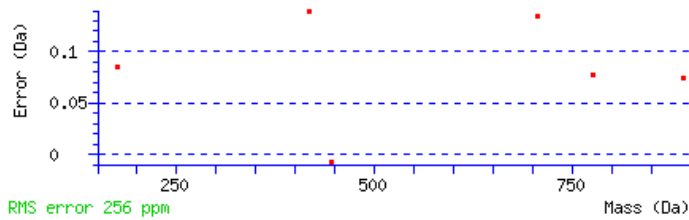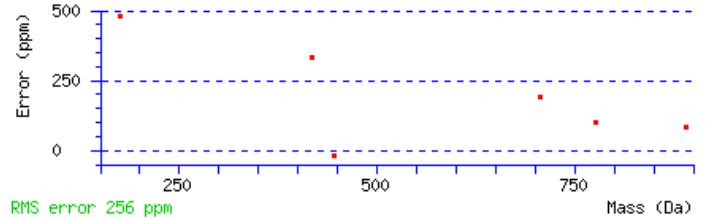

MS/MS Fragmentation of **LSLEGDHSTPPSAYGSVKPYTNFDAER**

Found in **IPI00468203**, Annexin A2 (Mus musculus)

Match to Query 72730: 3052.408572 from (1018.476800, 3+) intensity (4254.1299)

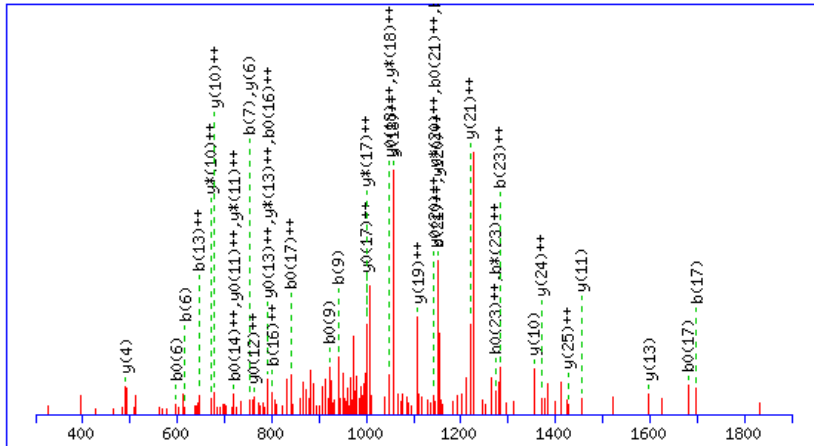

Monoisotopic mass of neutral peptide Mr(calc): 3052.4050  
 Variable modifications:  
 K18 : GlyGly (K)  
 N22 : Deamidated (NQ)  
 Ions Score: 21 Expect: 4.7  
 Matches : 42/274 fragment ions using 70 most intense peaks

| #  | b         | b <sup>++</sup> | b <sup>*</sup> | b <sup>+++</sup> | b <sup>0</sup> | b <sup>0++</sup> | Seq. | y         | y <sup>++</sup> | y <sup>*</sup> | y <sup>+++</sup> | y <sup>0</sup> | y <sup>0++</sup> | #  |
|----|-----------|-----------------|----------------|------------------|----------------|------------------|------|-----------|-----------------|----------------|------------------|----------------|------------------|----|
| 1  | 114.0913  | 57.5493         |                |                  |                |                  | L    |           |                 |                |                  |                |                  | 27 |
| 2  | 201.1234  | 101.0653        |                |                  | 183.1128       | 92.0600          | S    | 2940.3282 | 1470.6678       | 2923.3017      | 1462.1545        | 2922.3177      | 1461.6625        | 26 |
| 3  | 314.2074  | 157.6074        |                |                  | 296.1969       | 148.6021         | L    | 2853.2962 | 1427.1517       | 2836.2697      | 1418.6385        | 2835.2856      | 1418.1465        | 25 |
| 4  | 443.2500  | 222.1287        |                |                  | 425.2395       | 213.1234         | E    | 2740.2121 | 1370.6097       | 2723.1856      | 1362.0964        | 2722.2016      | 1361.6044        | 24 |
| 5  | 500.2715  | 250.6394        |                |                  | 482.2609       | 241.6341         | G    | 2611.1696 | 1306.0884       | 2594.1430      | 1297.5751        | 2593.1590      | 1297.0831        | 23 |
| 6  | 615.2984  | 308.1529        |                |                  | 597.2879       | 299.1476         | D    | 2554.1481 | 1277.5777       | 2537.1215      | 1269.0644        | 2536.1375      | 1268.5724        | 22 |
| 7  | 752.3573  | 376.6823        |                |                  | 734.3468       | 367.6770         | H    | 2439.1211 | 1220.0642       | 2422.0946      | 1211.5509        | 2421.1106      | 1211.0589        | 21 |
| 8  | 839.3894  | 420.1983        |                |                  | 821.3788       | 411.1930         | S    | 2302.0622 | 1151.5348       | 2285.0357      | 1143.0215        | 2284.0517      | 1142.5295        | 20 |
| 9  | 940.4371  | 470.7222        |                |                  | 922.4265       | 461.7169         | T    | 2215.0302 | 1108.0187       | 2198.0037      | 1099.5055        | 2197.0196      | 1099.0135        | 19 |
| 10 | 1037.4898 | 519.2485        |                |                  | 1019.4792      | 510.2433         | P    | 2113.9825 | 1057.4949       | 2096.9560      | 1048.9816        | 2095.9720      | 1048.4896        | 18 |
| 11 | 1134.5426 | 567.7749        |                |                  | 1116.5320      | 558.7696         | P    | 2016.9298 | 1008.9685       | 1999.9032      | 1000.4552        | 1998.9192      | 999.9632         | 17 |
| 12 | 1221.5746 | 611.2909        |                |                  | 1203.5640      | 602.2857         | S    | 1919.8770 | 960.4421        | 1902.8504      | 951.9289         | 1901.8664      | 951.4369         | 16 |
| 13 | 1292.6117 | 646.8095        |                |                  | 1274.6012      | 637.8042         | A    | 1832.8450 | 916.9261        | 1815.8184      | 908.4128         | 1814.8344      | 907.9208         | 15 |
| 14 | 1455.6751 | 728.3412        |                |                  | 1437.6645      | 719.3359         | Y    | 1761.8079 | 881.4076        | 1744.7813      | 872.8943         | 1743.7973      | 872.4023         | 14 |
| 15 | 1512.6965 | 756.8519        |                |                  | 1494.6859      | 747.8466         | G    | 1598.7445 | 799.8759        | 1581.7180      | 791.3626         | 1580.7340      | 790.8706         | 13 |
| 16 | 1599.7285 | 800.3679        |                |                  | 1581.7180      | 791.3626         | S    | 1541.7231 | 771.3652        | 1524.6965      | 762.8519         | 1523.7125      | 762.3599         | 12 |
| 17 | 1698.7970 | 849.9021        |                |                  | 1680.7864      | 840.8968         | V    | 1454.6910 | 727.8492        | 1437.6645      | 719.3359         | 1436.6805      | 718.8439         | 11 |
| 18 | 1940.9348 | 970.9711        | 1923.9083      | 962.4578         | 1922.9243      | 961.9658         | K    | 1355.6226 | 678.3149        | 1338.5961      | 669.8017         | 1337.6121      | 669.3097         | 10 |
| 19 | 2037.9876 | 1019.4974       | 2020.9611      | 1010.9842        | 2019.9770      | 1010.4922        | P    | 1113.4847 | 557.2460        | 1096.4582      | 548.7327         | 1095.4742      | 548.2407         | 9  |
| 20 | 2201.0509 | 1101.0291       | 2184.0244      | 1092.5158        | 2183.0404      | 1092.0238        | Y    | 1016.4320 | 508.7196        | 999.4054       | 500.2063         | 998.4214       | 499.7143         | 8  |
| 21 | 2302.0986 | 1151.5529       | 2285.0721      | 1143.0397        | 2284.0881      | 1142.5477        | T    | 853.3686  | 427.1880        | 836.3421       | 418.6747         | 835.3581       | 418.1827         | 7  |
| 22 | 2417.1256 | 1209.0664       | 2400.0990      | 1200.5531        | 2399.1150      | 1200.0611        | N    | 752.3210  | 376.6641        | 735.2944       | 368.1508         | 734.3104       | 367.6588         | 6  |
| 23 | 2564.1940 | 1282.6006       | 2547.1674      | 1274.0874        | 2546.1834      | 1273.5953        | F    | 637.2940  | 319.1506        | 620.2675       | 310.6374         | 619.2835       | 310.1454         | 5  |
| 24 | 2679.2209 | 1340.1141       | 2662.1944      | 1331.6008        | 2661.2104      | 1331.1088        | D    | 490.2256  | 245.6164        | 473.1991       | 237.1032         | 472.2150       | 236.6112         | 4  |
| 25 | 2750.2580 | 1375.6327       | 2733.2315      | 1367.1194        | 2732.2475      | 1366.6274        | A    | 375.1987  | 188.1030        | 358.1721       | 179.5897         | 357.1881       | 179.0977         | 3  |
| 26 | 2879.3006 | 1440.1540       | 2862.2741      | 1431.6407        | 2861.2901      | 1431.1487        | E    | 304.1615  | 152.5844        | 287.1350       | 144.0711         | 286.1510       | 143.5791         | 2  |
| 27 |           |                 |                |                  |                |                  | R    | 175.1190  | 88.0631         | 158.0924       | 79.5498          |                |                  | 1  |

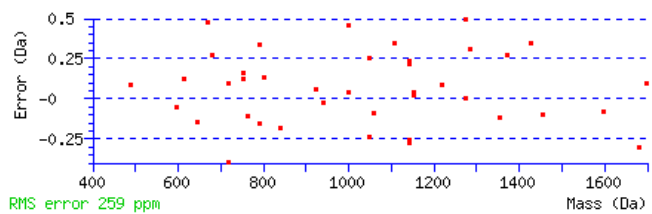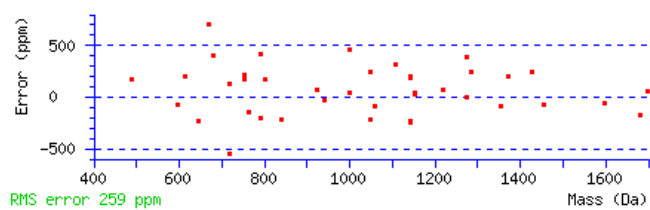

MS/MS Fragmentation of **LIFAGKQLEDGR**

Found in **IPI00470152**, ribosomal protein S27a (Mus musculus)

Match to Query 36141: 1459.779548 from (730.897050, 2+) intensity (1477.7528)

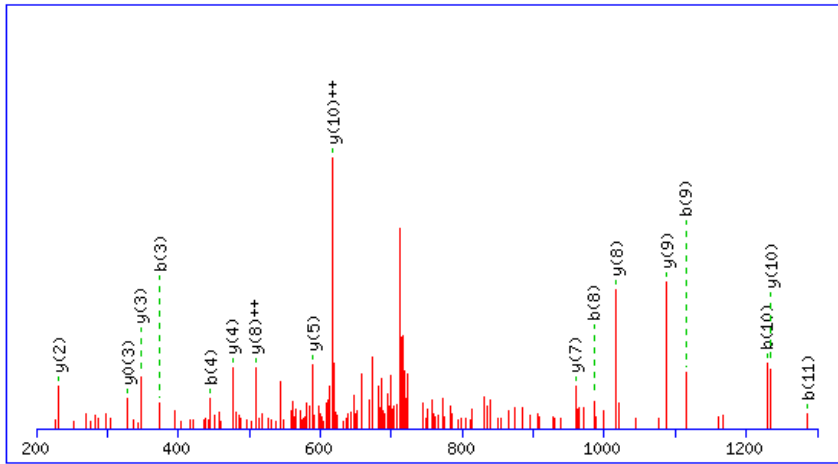

Monoisotopic mass of neutral peptide Mr(calc): 1459.7783

Variable modifications:

K6 : GlyGly (K)

Ions Score: 48 Expect: 0.0023

Matches : 17/102 fragment ions using 32 most intense peaks

| #  | b                | b <sup>++</sup> | b <sup>*</sup> | b <sup>+++</sup> | b <sup>0</sup> | b <sup>0++</sup> | Seq. | y                | y <sup>++</sup> | y <sup>*</sup> | y <sup>+++</sup> | y <sup>0</sup>  | y <sup>0++</sup> | #  |
|----|------------------|-----------------|----------------|------------------|----------------|------------------|------|------------------|-----------------|----------------|------------------|-----------------|------------------|----|
| 1  | 114.0913         | 57.5493         |                |                  |                |                  | L    |                  |                 |                |                  |                 |                  | 12 |
| 2  | 227.1754         | 114.0913        |                |                  |                |                  | I    | 1347.7015        | 674.3544        | 1330.6750      | 665.8411         | 1329.6910       | 665.3491         | 11 |
| 3  | <b>374.2438</b>  | 187.6255        |                |                  |                |                  | F    | <b>1234.6175</b> | <b>617.8124</b> | 1217.5909      | 609.2991         | 1216.6069       | 608.8071         | 10 |
| 4  | <b>445.2809</b>  | 223.1441        |                |                  |                |                  | A    | <b>1087.5491</b> | 544.2782        | 1070.5225      | 535.7649         | 1069.5385       | 535.2729         | 9  |
| 5  | 502.3024         | 251.6548        |                |                  |                |                  | G    | <b>1016.5119</b> | <b>508.7596</b> | 999.4854       | 500.2463         | 998.5014        | 499.7543         | 8  |
| 6  | 744.4403         | 372.7238        | 727.4137       | 364.2105         |                |                  | K    | <b>959.4905</b>  | 480.2489        | 942.4639       | 471.7356         | 941.4799        | 471.2436         | 7  |
| 7  | 872.4989         | 436.7531        | 855.4723       | 428.2398         |                |                  | Q    | 717.3526         | 359.1799        | 700.3260       | 350.6667         | 699.3420        | 350.1747         | 6  |
| 8  | <b>985.5829</b>  | 493.2951        | 968.5564       | 484.7818         |                |                  | L    | <b>589.2940</b>  | 295.1506        | 572.2675       | 286.6374         | 571.2835        | 286.1454         | 5  |
| 9  | <b>1114.6255</b> | 557.8164        | 1097.5990      | 549.3031         | 1096.6150      | 548.8111         | E    | <b>476.2100</b>  | 238.6086        | 459.1834       | 230.0953         | 458.1994        | 229.6033         | 4  |
| 10 | <b>1229.6525</b> | 615.3299        | 1212.6259      | 606.8166         | 1211.6419      | 606.3246         | D    | <b>347.1674</b>  | 174.0873        | 330.1408       | 165.5740         | <b>329.1568</b> | 165.0820         | 3  |
| 11 | <b>1286.6739</b> | 643.8406        | 1269.6474      | 635.3273         | 1268.6634      | 634.8353         | G    | <b>232.1404</b>  | 116.5738        | 215.1139       | 108.0606         |                 |                  | 2  |
| 12 |                  |                 |                |                  |                |                  | R    | 175.1190         | 88.0631         | 158.0924       | 79.5498          |                 |                  | 1  |

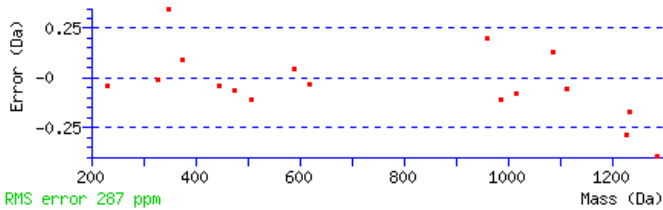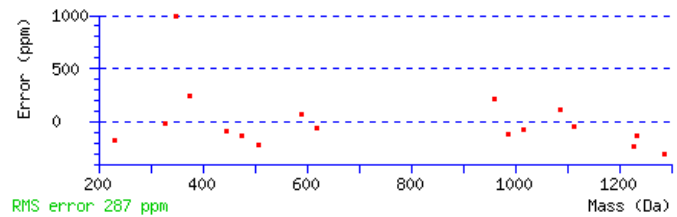

MS/MS Fragmentation of **KIEDNTLVFIVDVK**

Found in **IPI00623004**, similar to ribosomal protein L23a (Mus musculus)

Match to Query 50142: 1745.95642 from (582.992790, 3+) intensity (3518.8088)

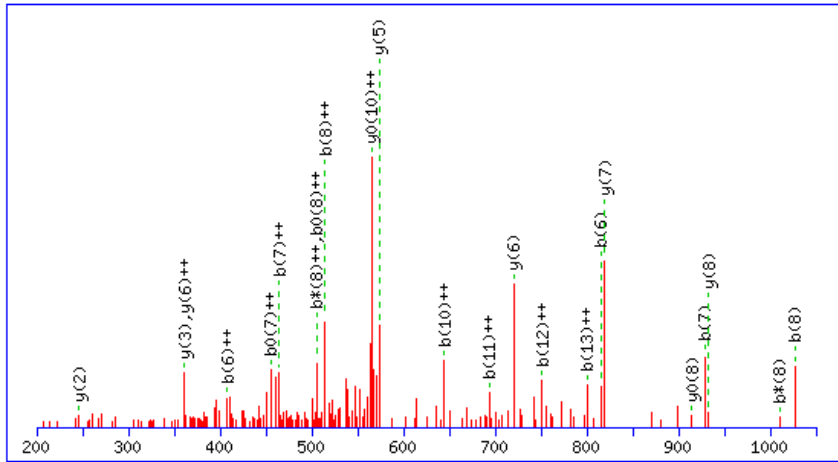

Monoisotopic mass of neutral peptide  $M_r(\text{calc})$ : 1745.9563

Variable modifications:

**K1** : GlyGly (K)

Ions Score: 55 Expect: 0.00016

Matches : 23/148 fragment ions using 26 most intense peaks

| #  | b                | b <sup>++</sup> | b <sup>+</sup>   | b <sup>+++</sup> | b <sup>0</sup> | b <sup>0++</sup> | Seq.     | y               | y <sup>++</sup> | y <sup>+</sup> | y <sup>+++</sup> | y <sup>0</sup>  | y <sup>0++</sup> | #         |
|----|------------------|-----------------|------------------|------------------|----------------|------------------|----------|-----------------|-----------------|----------------|------------------|-----------------|------------------|-----------|
| 1  | 243.1452         | 122.0762        | 226.1186         | 113.5629         |                |                  | <b>K</b> |                 |                 |                |                  |                 |                  | <b>14</b> |
| 2  | 356.2292         | 178.6183        | 339.2027         | 170.1050         |                |                  | <b>I</b> | 1504.8257       | 752.9165        | 1487.7992      | 744.4032         | 1486.8152       | 743.9112         | <b>13</b> |
| 3  | 485.2718         | 243.1395        | 468.2453         | 234.6263         | 467.2613       | 234.1343         | <b>E</b> | 1391.7417       | 696.3745        | 1374.7151      | 687.8612         | 1373.7311       | 687.3692         | <b>12</b> |
| 4  | 600.2988         | 300.6530        | 583.2722         | 292.1397         | 582.2882       | 291.6477         | <b>D</b> | 1262.6991       | 631.8532        | 1245.6725      | 623.3399         | 1244.6885       | 622.8479         | <b>11</b> |
| 5  | 714.3417         | 357.6745        | 697.3151         | 349.1612         | 696.3311       | 348.6692         | <b>N</b> | 1147.6721       | 574.3397        | 1130.6456      | 565.8264         | 1129.6616       | 565.3344         | <b>10</b> |
| 6  | <b>815.3894</b>  | <b>408.1983</b> | 798.3628         | 399.6850         | 797.3788       | 399.1930         | <b>T</b> | 1033.6292       | 517.3182        | 1016.6027      | 508.8050         | 1015.6186       | 508.3130         | <b>9</b>  |
| 7  | <b>928.4734</b>  | <b>464.7404</b> | 911.4469         | 456.2271         | 910.4629       | <b>455.7351</b>  | <b>L</b> | <b>932.5815</b> | 466.7944        | 915.5550       | 458.2811         | <b>914.5710</b> | 457.7891         | <b>8</b>  |
| 8  | <b>1027.5419</b> | <b>514.2746</b> | <b>1010.5153</b> | <b>505.7613</b>  | 1009.5313      | <b>505.2693</b>  | <b>V</b> | <b>819.4975</b> | 410.2524        | 802.4709       | 401.7391         | 801.4869        | 401.2471         | <b>7</b>  |
| 9  | 1174.6103        | 587.8088        | 1157.5837        | 579.2955         | 1156.5997      | 578.8035         | <b>F</b> | <b>720.4291</b> | <b>360.7182</b> | 703.4025       | 352.2049         | 702.4185        | 351.7129         | <b>6</b>  |
| 10 | 1287.6943        | <b>644.3508</b> | 1270.6678        | 635.8375         | 1269.6838      | 635.3455         | <b>I</b> | <b>573.3606</b> | 287.1840        | 556.3341       | 278.6707         | 555.3501        | 278.1787         | <b>5</b>  |
| 11 | 1386.7627        | <b>693.8850</b> | 1369.7362        | 685.3717         | 1368.7522      | 684.8797         | <b>V</b> | 460.2766        | 230.6419        | 443.2500       | 222.1287         | 442.2660        | 221.6366         | <b>4</b>  |
| 12 | 1501.7897        | <b>751.3985</b> | 1484.7631        | 742.8852         | 1483.7791      | 742.3932         | <b>D</b> | <b>361.2082</b> | 181.1077        | 344.1816       | 172.5944         | 343.1976        | 172.1024         | <b>3</b>  |
| 13 | 1600.8581        | <b>800.9327</b> | 1583.8316        | 792.4194         | 1582.8475      | 791.9274         | <b>V</b> | <b>246.1812</b> | 123.5942        | 229.1547       | 115.0810         |                 |                  | <b>2</b>  |
| 14 |                  |                 |                  |                  |                |                  | <b>K</b> | 147.1128        | 74.0600         | 130.0863       | 65.5468          |                 |                  | <b>1</b>  |

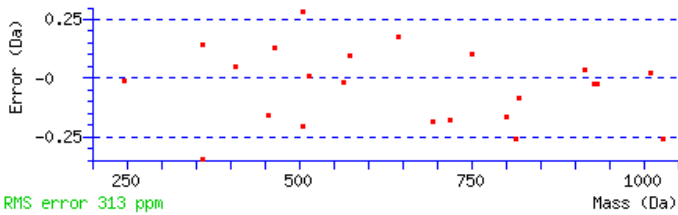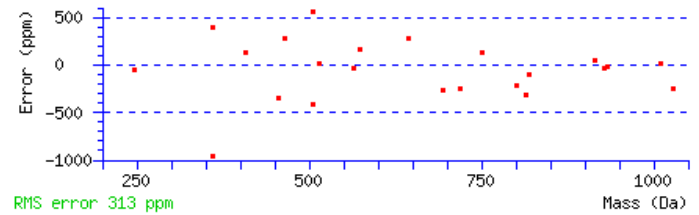

MS/MS Fragmentation of **EKLEVQCQAEK**

Found in **IPI00623749**, A kinase (PRKA) anchor protein (yotiao) 9 (Mus musculus)

Match to Query 33829: 1418.680448 from (710.347500, 2+) intensity (1236.1418)

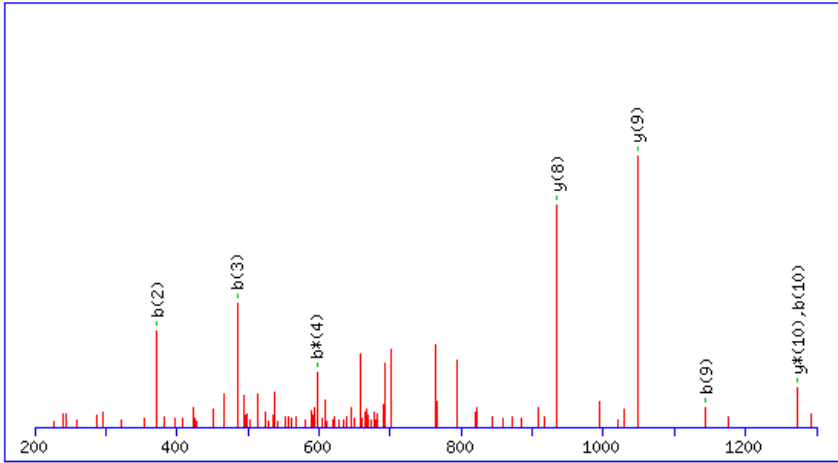

Monoisotopic mass of neutral peptide Mr(calc): 1418.6711

Variable modifications:

K2 : GlyGly (K)

Q8 : Deamidated (NQ)

Ions Score: 25 Expect: 0.75

Matches : 8/116 fragment ions using 11 most intense peaks

| #  | b                | b <sup>++</sup> | b <sup>*</sup>  | b <sup>+++</sup> | b <sup>0</sup> | b <sup>0++</sup> | Seq. | y                | y <sup>++</sup> | y <sup>*</sup>   | y <sup>+++</sup> | y <sup>0</sup> | y <sup>0++</sup> | #  |
|----|------------------|-----------------|-----------------|------------------|----------------|------------------|------|------------------|-----------------|------------------|------------------|----------------|------------------|----|
| 1  | 130.0499         | 65.5286         |                 |                  | 112.0393       | 56.5233          | E    |                  |                 |                  |                  |                |                  | 11 |
| 2  | <b>372.1878</b>  | 186.5975        | 355.1612        | 178.0842         | 354.1772       | 177.5922         | K    | 1290.6358        | 645.8216        | <b>1273.6093</b> | 637.3083         | 1272.6253      | 636.8163         | 10 |
| 3  | <b>485.2718</b>  | 243.1395        | 468.2453        | 234.6263         | 467.2613       | 234.1343         | L    | <b>1048.4979</b> | 524.7526        | 1031.4714        | 516.2393         | 1030.4874      | 515.7473         | 9  |
| 4  | 614.3144         | 307.6608        | <b>597.2879</b> | 299.1476         | 596.3039       | 298.6556         | E    | <b>935.4139</b>  | 468.2106        | 918.3873         | 459.6973         | 917.4033       | 459.2053         | 8  |
| 5  | 713.3828         | 357.1951        | 696.3563        | 348.6818         | 695.3723       | 348.1898         | V    | 806.3713         | 403.6893        | 789.3447         | 395.1760         | 788.3607       | 394.6840         | 7  |
| 6  | 841.4414         | 421.2243        | 824.4149        | 412.7111         | 823.4308       | 412.2191         | Q    | 707.3029         | 354.1551        | 690.2763         | 345.6418         | 689.2923       | 345.1498         | 6  |
| 7  | 944.4506         | 472.7289        | 927.4240        | 464.2157         | 926.4400       | 463.7237         | C    | 579.2443         | 290.1258        | 562.2177         | 281.6125         | 561.2337       | 281.1205         | 5  |
| 8  | 1073.4932        | 537.2502        | 1056.4666       | 528.7370         | 1055.4826      | 528.2449         | Q    | 476.2351         | 238.6212        | 459.2086         | 230.1079         | 458.2245       | 229.6159         | 4  |
| 9  | <b>1144.5303</b> | 572.7688        | 1127.5038       | 564.2555         | 1126.5197      | 563.7635         | A    | 347.1925         | 174.0999        | 330.1660         | 165.5866         | 329.1819       | 165.0946         | 3  |
| 10 | <b>1273.5729</b> | 637.2901        | 1256.5463       | 628.7768         | 1255.5623      | 628.2848         | E    | 276.1554         | 138.5813        | 259.1288         | 130.0681         | 258.1448       | 129.5761         | 2  |
| 11 |                  |                 |                 |                  |                |                  | K    | 147.1128         | 74.0600         | 130.0863         | 65.5468          |                |                  | 1  |

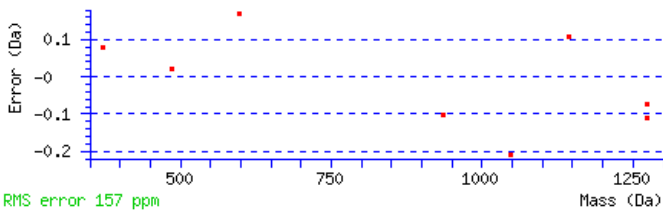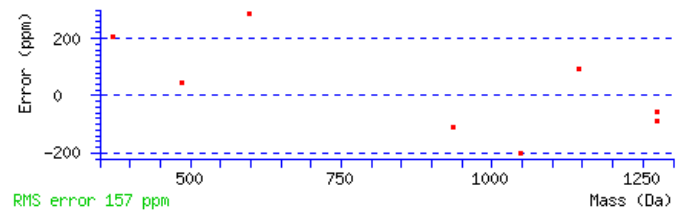



MS/MS Fragmentation of **KPEATTVPVK**

Found in **IPI00756257**, Isoform 1 of Titin (Mus musculus)

Match to Query 26172: 1279.710762 from (427.577530, 3+) intensity (3471.4924)

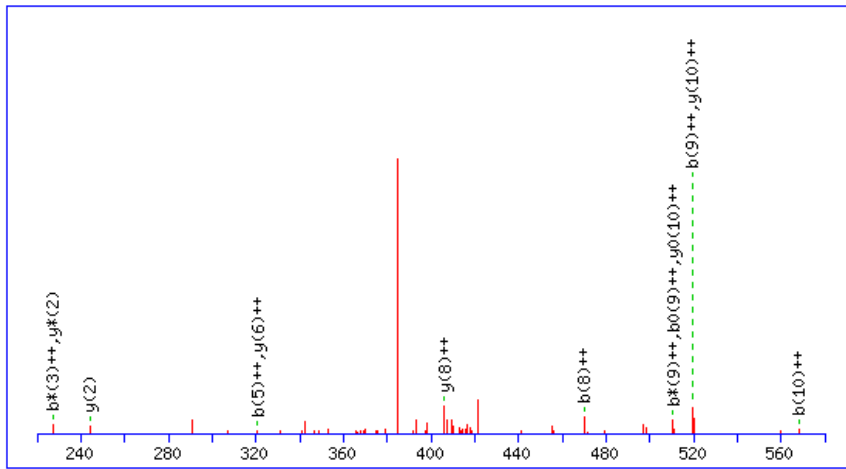

Monoisotopic mass of neutral peptide Mr(calc): 1279.7136

Variable modifications:

K1 : GlyGly (K)

Ions Score: 16 Expect: 1.1

Matches : 13/106 fragment ions using 17 most intense peaks

| #  | b         | b <sup>++</sup> | b <sup>*</sup> | b <sup>+++</sup> | b <sup>0</sup> | b <sup>0++</sup> | Seq. | y         | y <sup>++</sup> | y <sup>*</sup> | y <sup>+++</sup> | y <sup>0</sup> | y <sup>0++</sup> | #  |
|----|-----------|-----------------|----------------|------------------|----------------|------------------|------|-----------|-----------------|----------------|------------------|----------------|------------------|----|
| 1  | 243.1452  | 122.0762        | 226.1186       | 113.5629         |                |                  | K    |           |                 |                |                  |                |                  | 11 |
| 2  | 340.1979  | 170.6026        | 323.1714       | 162.0893         |                |                  | P    | 1038.5830 | 519.7951        | 1021.5564      | 511.2819         | 1020.5724      | 510.7899         | 10 |
| 3  | 469.2405  | 235.1239        | 452.2140       | 226.6106         | 451.2300       | 226.1186         | E    | 941.5302  | 471.2688        | 924.5037       | 462.7555         | 923.5197       | 462.2635         | 9  |
| 4  | 540.2776  | 270.6425        | 523.2511       | 262.1292         | 522.2671       | 261.6372         | A    | 812.4876  | 406.7475        | 795.4611       | 398.2342         | 794.4771       | 397.7422         | 8  |
| 5  | 641.3253  | 321.1663        | 624.2988       | 312.6530         | 623.3148       | 312.1610         | T    | 741.4505  | 371.2289        | 724.4240       | 362.7156         | 723.4400       | 362.2236         | 7  |
| 6  | 742.3730  | 371.6901        | 725.3464       | 363.1769         | 724.3624       | 362.6849         | T    | 640.4028  | 320.7051        | 623.3763       | 312.1918         | 622.3923       | 311.6998         | 6  |
| 7  | 841.4414  | 421.2243        | 824.4149       | 412.7111         | 823.4308       | 412.2191         | V    | 539.3552  | 270.1812        | 522.3286       | 261.6679         |                |                  | 5  |
| 8  | 938.4942  | 469.7507        | 921.4676       | 461.2375         | 920.4836       | 460.7454         | P    | 440.2867  | 220.6470        | 423.2602       | 212.1337         |                |                  | 4  |
| 9  | 1037.5626 | 519.2849        | 1020.5360      | 510.7717         | 1019.5520      | 510.2796         | V    | 343.2340  | 172.1206        | 326.2074       | 163.6074         |                |                  | 3  |
| 10 | 1134.6154 | 567.8113        | 1117.5888      | 559.2980         | 1116.6048      | 558.8060         | P    | 244.1656  | 122.5864        | 227.1390       | 114.0731         |                |                  | 2  |
| 11 |           |                 |                |                  |                |                  | K    | 147.1128  | 74.0600         | 130.0863       | 65.5468          |                |                  | 1  |

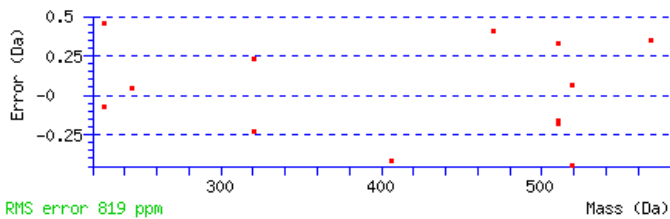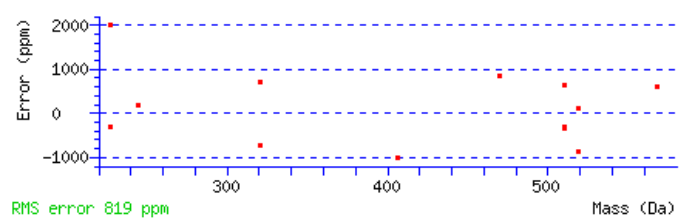

# MS/MS Fragmentation of **KTASVLGIQDK**

Found in **IPI00875801**, Alpha-protein kinase 3 (Mus musculus)

Match to Query 25815: 1272.707128 from (637.360840, 2+) intensity (2097.3022)

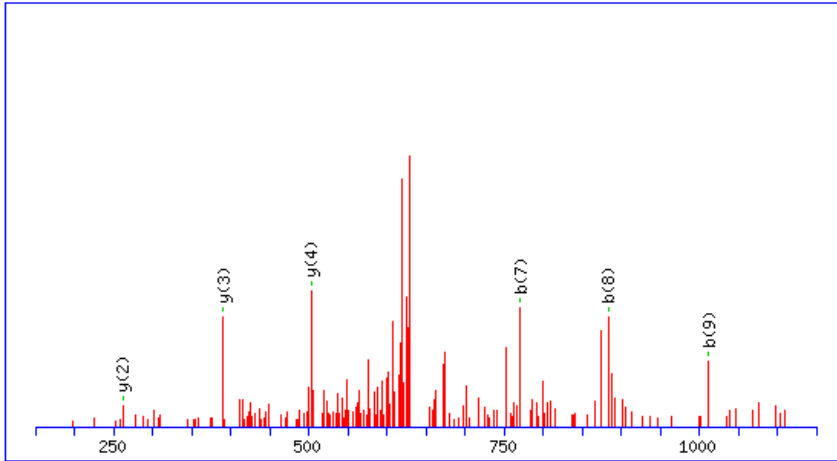

Monoisotopic mass of neutral peptide Mr(calc): 1272.7038

Variable modifications:

K1 : GlyGly (K)

Ions Score: 16 Expect: 1.9

Matches : 6/116 fragment ions using 10 most intense peaks

| #  | b                | b <sup>++</sup> | b <sup>*</sup> | b <sup>*++</sup> | b <sup>0</sup> | b <sup>0++</sup> | Seq.     | y               | y <sup>++</sup> | y <sup>*</sup> | y <sup>*++</sup> | y <sup>0</sup> | y <sup>0++</sup> | #         |
|----|------------------|-----------------|----------------|------------------|----------------|------------------|----------|-----------------|-----------------|----------------|------------------|----------------|------------------|-----------|
| 1  | 243.1452         | 122.0762        | 226.1186       | 113.5629         |                |                  | <b>K</b> |                 |                 |                |                  |                |                  | <b>11</b> |
| 2  | 344.1928         | 172.6001        | 327.1663       | 164.0868         | 326.1823       | 163.5948         | <b>T</b> | 1031.5732       | 516.2902        | 1014.5466      | 507.7769         | 1013.5626      | 507.2849         | <b>10</b> |
| 3  | 415.2300         | 208.1186        | 398.2034       | 199.6053         | 397.2194       | 199.1133         | <b>A</b> | 930.5255        | 465.7664        | 913.4989       | 457.2531         | 912.5149       | 456.7611         | <b>9</b>  |
| 4  | 502.2620         | 251.6346        | 485.2354       | 243.1214         | 484.2514       | 242.6293         | <b>S</b> | 859.4884        | 430.2478        | 842.4618       | 421.7345         | 841.4778       | 421.2425         | <b>8</b>  |
| 5  | 601.3304         | 301.1688        | 584.3039       | 292.6556         | 583.3198       | 292.1636         | <b>V</b> | 772.4563        | 386.7318        | 755.4298       | 378.2185         | 754.4458       | 377.7265         | <b>7</b>  |
| 6  | 714.4145         | 357.7109        | 697.3879       | 349.1976         | 696.4039       | 348.7056         | <b>L</b> | 673.3879        | 337.1976        | 656.3614       | 328.6843         | 655.3774       | 328.1923         | <b>6</b>  |
| 7  | <b>771.4359</b>  | 386.2216        | 754.4094       | 377.7083         | 753.4254       | 377.2163         | <b>G</b> | 560.3039        | 280.6556        | 543.2773       | 272.1423         | 542.2933       | 271.6503         | <b>5</b>  |
| 8  | <b>884.5200</b>  | 442.7636        | 867.4934       | 434.2504         | 866.5094       | 433.7584         | <b>I</b> | <b>503.2824</b> | 252.1448        | 486.2558       | 243.6316         | 485.2718       | 243.1395         | <b>4</b>  |
| 9  | <b>1012.5786</b> | 506.7929        | 995.5520       | 498.2796         | 994.5680       | 497.7876         | <b>Q</b> | <b>390.1983</b> | 195.6028        | 373.1718       | 187.0895         | 372.1878       | 186.5975         | <b>3</b>  |
| 10 | 1127.6055        | 564.3064        | 1110.5790      | 555.7931         | 1109.5949      | 555.3011         | <b>D</b> | <b>262.1397</b> | 131.5735        | 245.1132       | 123.0602         | 244.1292       | 122.5682         | <b>2</b>  |
| 11 |                  |                 |                |                  |                |                  | <b>K</b> | 147.1128        | 74.0600         | 130.0863       | 65.5468          |                |                  | <b>1</b>  |

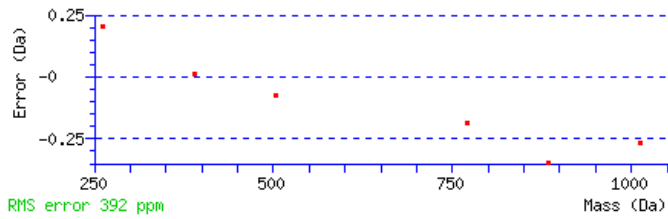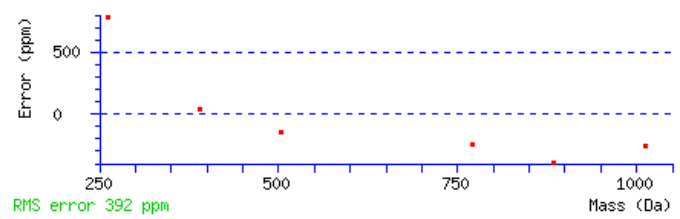

MS/MS Fragmentation of **RPKSSQNIPVQQAR**

Found in **IPI00876033**, Putative uncharacterized protein (Mus musculus)

Match to Query 49192: 1722.926022 from (575.315950, 3+) intensity (6088.6660)

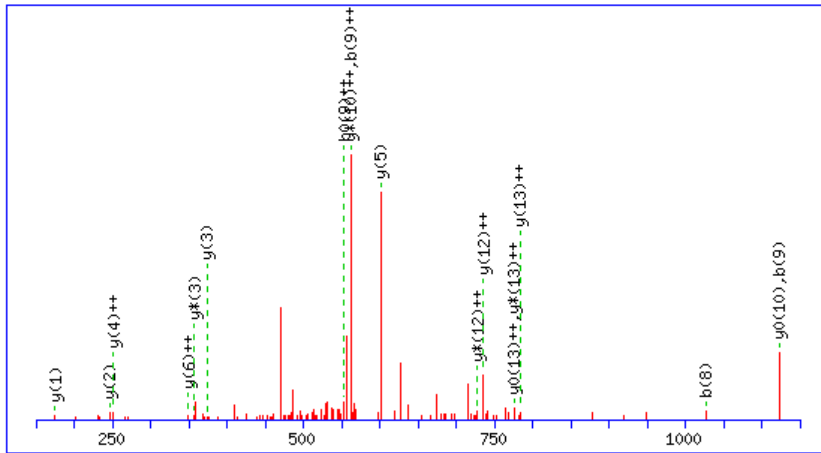

Monoisotopic mass of neutral peptide Mr(calc): 1722.9125

Variable modifications:

K3 : GlyGly (K)

N7 : Deamidated (NQ)

Ions Score: 19 Expect: 1

Matches : 20/132 fragment ions using 38 most intense peaks

| #  | b         | b <sup>++</sup> | b <sup>*</sup> | b <sup>+++</sup> | b <sup>0</sup> | b <sup>0++</sup> | Seq. | y         | y <sup>++</sup> | y <sup>*</sup> | y <sup>+++</sup> | y <sup>0</sup> | y <sup>0++</sup> | #  |
|----|-----------|-----------------|----------------|------------------|----------------|------------------|------|-----------|-----------------|----------------|------------------|----------------|------------------|----|
| 1  | 157.1084  | 79.0578         | 140.0818       | 70.5446          |                |                  | R    |           |                 |                |                  |                |                  | 14 |
| 2  | 254.1612  | 127.5842        | 237.1346       | 119.0709         |                |                  | P    | 1567.8187 | 784.4130        | 1550.7921      | 775.8997         | 1549.8081      | 775.4077         | 13 |
| 3  | 496.2990  | 248.6532        | 479.2725       | 240.1399         |                |                  | K    | 1470.7659 | 735.8866        | 1453.7394      | 727.3733         | 1452.7554      | 726.8813         | 12 |
| 4  | 583.3311  | 292.1692        | 566.3045       | 283.6559         | 565.3205       | 283.1639         | S    | 1228.6280 | 614.8177        | 1211.6015      | 606.3044         | 1210.6175      | 605.8124         | 11 |
| 5  | 670.3631  | 335.6852        | 653.3365       | 327.1719         | 652.3525       | 326.6799         | S    | 1141.5960 | 571.3016        | 1124.5695      | 562.7884         | 1123.5854      | 562.2964         | 10 |
| 6  | 798.4217  | 399.7145        | 781.3951       | 391.2012         | 780.4111       | 390.7092         | Q    | 1054.5640 | 527.7856        | 1037.5374      | 519.2724         |                |                  | 9  |
| 7  | 913.4486  | 457.2279        | 896.4221       | 448.7147         | 895.4381       | 448.2227         | N    | 926.5054  | 463.7563        | 909.4789       | 455.2431         |                |                  | 8  |
| 8  | 1026.5327 | 513.7700        | 1009.5061      | 505.2567         | 1008.5221      | 504.7647         | I    | 811.4785  | 406.2429        | 794.4519       | 397.7296         |                |                  | 7  |
| 9  | 1123.5854 | 562.2964        | 1106.5589      | 553.7831         | 1105.5749      | 553.2911         | P    | 698.3944  | 349.7008        | 681.3679       | 341.1876         |                |                  | 6  |
| 10 | 1222.6539 | 611.8306        | 1205.6273      | 603.3173         | 1204.6433      | 602.8253         | V    | 601.3416  | 301.1745        | 584.3151       | 292.6612         |                |                  | 5  |
| 11 | 1350.7124 | 675.8599        | 1333.6859      | 667.3466         | 1332.7019      | 666.8546         | Q    | 502.2732  | 251.6402        | 485.2467       | 243.1270         |                |                  | 4  |
| 12 | 1478.7710 | 739.8891        | 1461.7445      | 731.3759         | 1460.7605      | 730.8839         | Q    | 374.2146  | 187.6110        | 357.1881       | 179.0977         |                |                  | 3  |
| 13 | 1549.8081 | 775.4077        | 1532.7816      | 766.8944         | 1531.7976      | 766.4024         | A    | 246.1561  | 123.5817        | 229.1295       | 115.0684         |                |                  | 2  |
| 14 |           |                 |                |                  |                |                  | R    | 175.1190  | 88.0631         | 158.0924       | 79.5498          |                |                  | 1  |

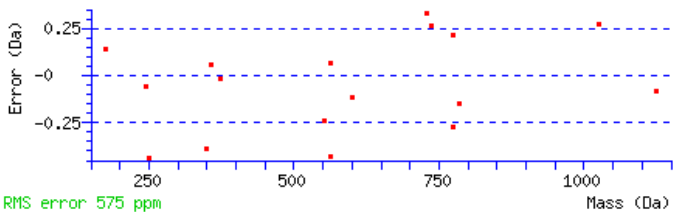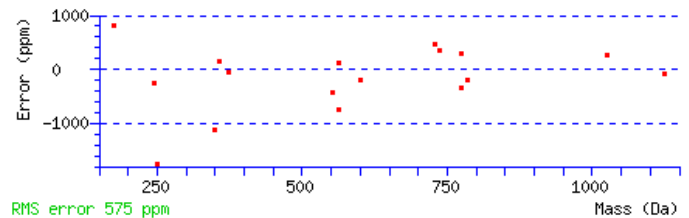

Supplement: supp_M112.025775_mcp.M112.025775-6.pdf [file supp_M112.025775_mcp.M112.025775-6.pdf]
