# Supplementary material
Source: PubMed Central journal article supplement (PMC3769319)
Supplement: supp_M112.025775_mcp.M112.025775-7.pdf [file supp_M112.025775_mcp.M112.025775-7.pdf]

IDENTIFICATION 1

MS/MS Fragmentation of **LSLDERIYVK**

Found in **IPI00230388**

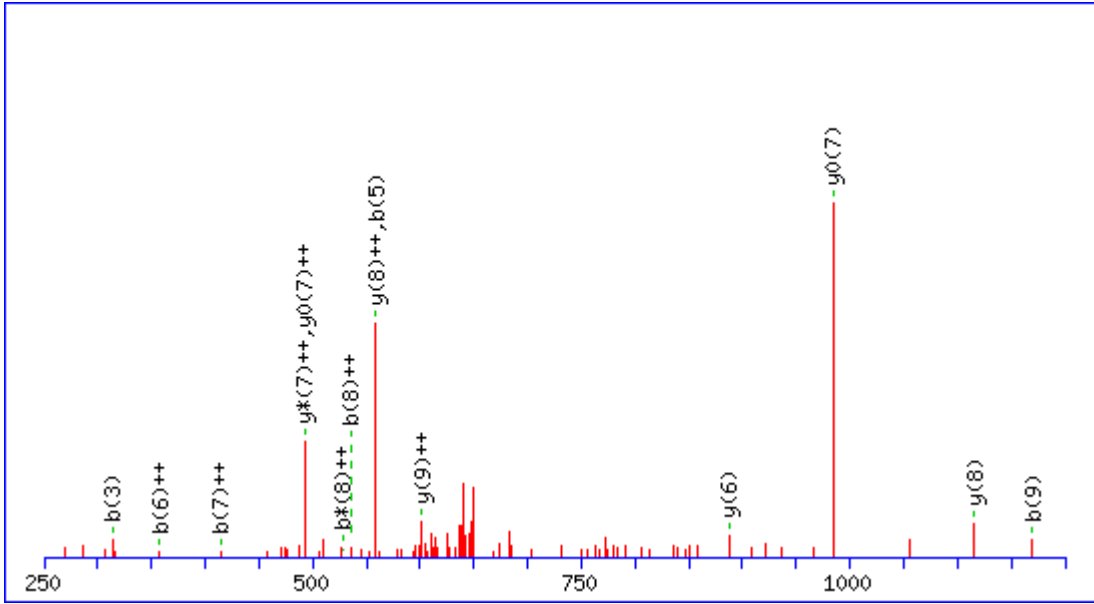

Monoisotopic mass of neutral peptide  $M_r(\text{calc})$ : 1314.6584

Fixed modifications: Carbamidomethyl (C) (apply to specified residues or termini only)

Variable modifications:

Y8 : Phospho (Y)

Ions Score: 21 Expect: 0.67 (help)

| #  | b         | b <sup>++</sup> | b <sup>*</sup> | b <sup>+++</sup> | b <sup>0</sup> | b <sup>0++</sup> | Seq. | y         | y <sup>++</sup> | y <sup>*</sup> | y <sup>+++</sup> | y <sup>0</sup> | y <sup>0++</sup> | #  |
|----|-----------|-----------------|----------------|------------------|----------------|------------------|------|-----------|-----------------|----------------|------------------|----------------|------------------|----|
| 1  | 114.0913  | 57.5493         |                |                  |                |                  | L    |           |                 |                |                  |                |                  | 10 |
| 2  | 201.1234  | 101.0653        |                |                  | 183.1128       | 92.0600          | S    | 1202.5817 | 601.7945        | 1185.5551      | 593.2812         | 1184.5711      | 592.7892         | 9  |
| 3  | 314.2074  | 157.6074        |                |                  | 296.1969       | 148.6021         | L    | 1115.5497 | 558.2785        | 1098.5231      | 549.7652         | 1097.5391      | 549.2732         | 8  |
| 4  | 429.2344  | 215.1208        |                |                  | 411.2238       | 206.1155         | D    | 1002.4656 | 501.7364        | 985.4390       | 493.2232         | 984.4550       | 492.7312         | 7  |
| 5  | 558.2770  | 279.6421        |                |                  | 540.2664       | 270.6368         | E    | 887.4386  | 444.2230        | 870.4121       | 435.7097         | 869.4281       | 435.2177         | 6  |
| 6  | 714.3781  | 357.6927        | 697.3515       | 349.1794         | 696.3675       | 348.6874         | R    | 758.3961  | 379.7017        | 741.3695       | 371.1884         |                |                  | 5  |
| 7  | 827.4621  | 414.2347        | 810.4356       | 405.7214         | 809.4516       | 405.2294         | I    | 602.2949  | 301.6511        | 585.2684       | 293.1378         |                |                  | 4  |
| 8  | 1070.4918 | 535.7495        | 1053.4653      | 527.2363         | 1052.4812      | 526.7443         | Y    | 489.2109  | 245.1091        | 472.1843       | 236.5958         |                |                  | 3  |
| 9  | 1169.5602 | 585.2837        | 1152.5337      | 576.7705         | 1151.5497      | 576.2785         | V    | 246.1812  | 123.5942        | 229.1547       | 115.0810         |                |                  | 2  |
| 10 |           |                 |                |                  |                |                  | K    | 147.1128  | 74.0600         | 130.0863       | 65.5468          |                |                  | 1  |

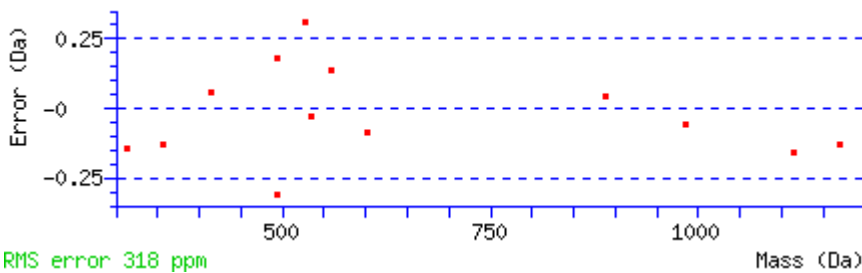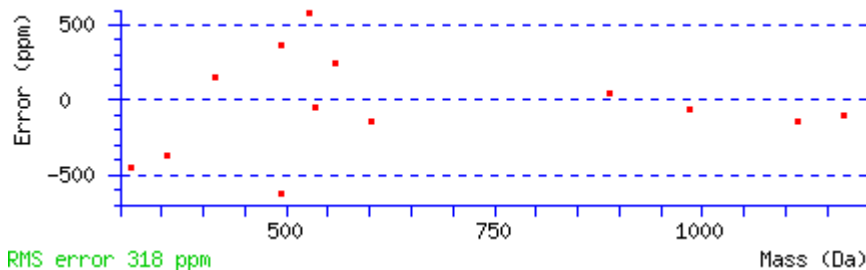

IDENTIFICATION 2

MS/MS Fragmentation of **LRLSPPTSQR**

Found in **IPI00230435**

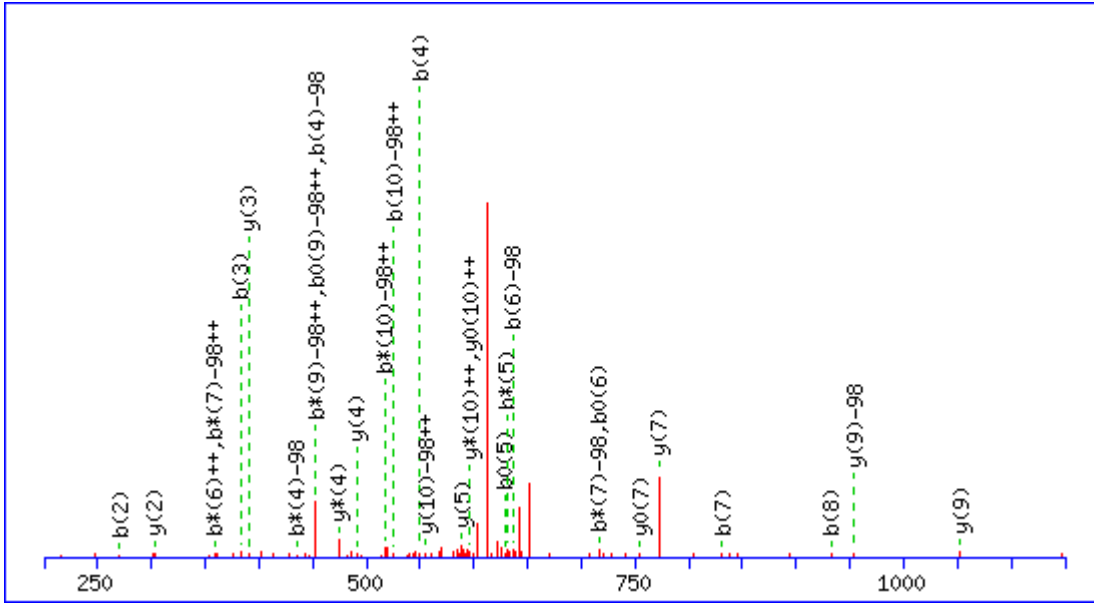

Monoisotopic mass of neutral peptide  $M_r(\text{calc})$ : 1320.6551

Fixed modifications: Carbamidomethyl (C) (apply to specified residues or termini only)

Variable modifications:

S4 : Phospho (ST), with neutral losses 97.9769 (shown in table), 0.0000

Ions Score: 22 Expect: 0.77 (help)

| #  | b         | b <sup>++</sup> | b <sup>*</sup> | b <sup>+++</sup> | b <sup>0</sup> | b <sup>0++</sup> | Seq. | y         | y <sup>++</sup> | y <sup>*</sup> | y <sup>+++</sup> | y <sup>0</sup> | y <sup>0++</sup> | #  |
|----|-----------|-----------------|----------------|------------------|----------------|------------------|------|-----------|-----------------|----------------|------------------|----------------|------------------|----|
| 1  | 114.0913  | 57.5493         |                |                  |                |                  | L    |           |                 |                |                  |                |                  | 11 |
| 2  | 270.1925  | 135.5999        | 253.1659       | 127.0866         |                |                  | R    | 1110.6014 | 555.8044        | 1093.5749      | 547.2911         | 1092.5909      | 546.7991         | 10 |
| 3  | 383.2765  | 192.1419        | 366.2500       | 183.6286         |                |                  | L    | 954.5003  | 477.7538        | 937.4738       | 469.2405         | 936.4898       | 468.7485         | 9  |
| 4  | 452.2980  | 226.6526        | 435.2714       | 218.1394         | 434.2874       | 217.6473         | S    | 841.4163  | 421.2118        | 824.3897       | 412.6985         | 823.4057       | 412.2065         | 8  |
| 5  | 549.3507  | 275.1790        | 532.3242       | 266.6657         | 531.3402       | 266.1737         | P    | 772.3948  | 386.7010        | 755.3682       | 378.1878         | 754.3842       | 377.6958         | 7  |
| 6  | 636.3828  | 318.6950        | 619.3562       | 310.1817         | 618.3722       | 309.6897         | S    | 675.3420  | 338.1747        | 658.3155       | 329.6614         | 657.3315       | 329.1694         | 6  |
| 7  | 733.4355  | 367.2214        | 716.4090       | 358.7081         | 715.4250       | 358.2161         | P    | 588.3100  | 294.6586        | 571.2835       | 286.1454         | 570.2994       | 285.6534         | 5  |
| 8  | 834.4832  | 417.7452        | 817.4567       | 409.2320         | 816.4726       | 408.7400         | T    | 491.2572  | 246.1323        | 474.2307       | 237.6190         | 473.2467       | 237.1270         | 4  |
| 9  | 921.5152  | 461.2613        | 904.4887       | 452.7480         | 903.5047       | 452.2560         | S    | 390.2096  | 195.6084        | 373.1830       | 187.0951         | 372.1990       | 186.6031         | 3  |
| 10 | 1049.5738 | 525.2905        | 1032.5473      | 516.7773         | 1031.5633      | 516.2853         | Q    | 303.1775  | 152.0924        | 286.1510       | 143.5791         |                |                  | 2  |
| 11 |           |                 |                |                  |                |                  | R    | 175.1190  | 88.0631         | 158.0924       | 79.5498          |                |                  | 1  |

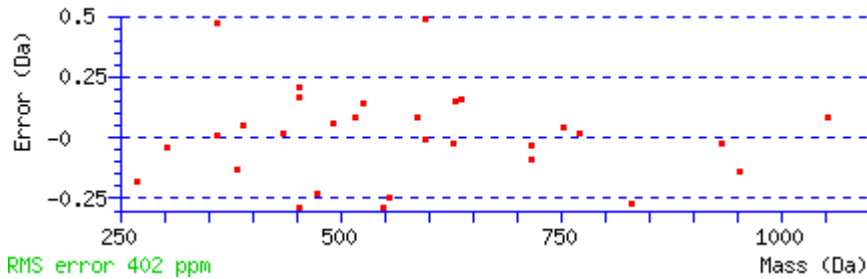

RMS error 402 ppm

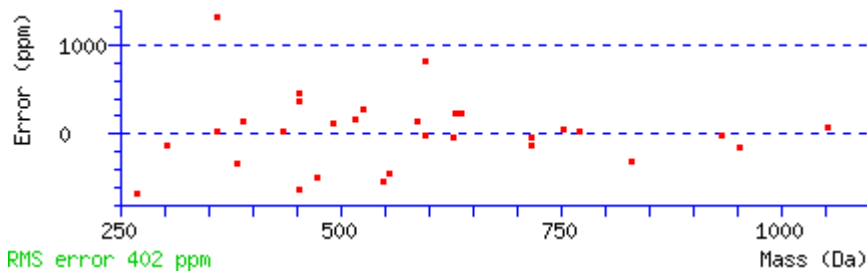

RMS error 402 ppm

IDENTIFICATION 3

MS/MS Fragmentation of **IMSIVDPNRLGVVTFQAFIDFMSR**

Found in **IPI00380436**

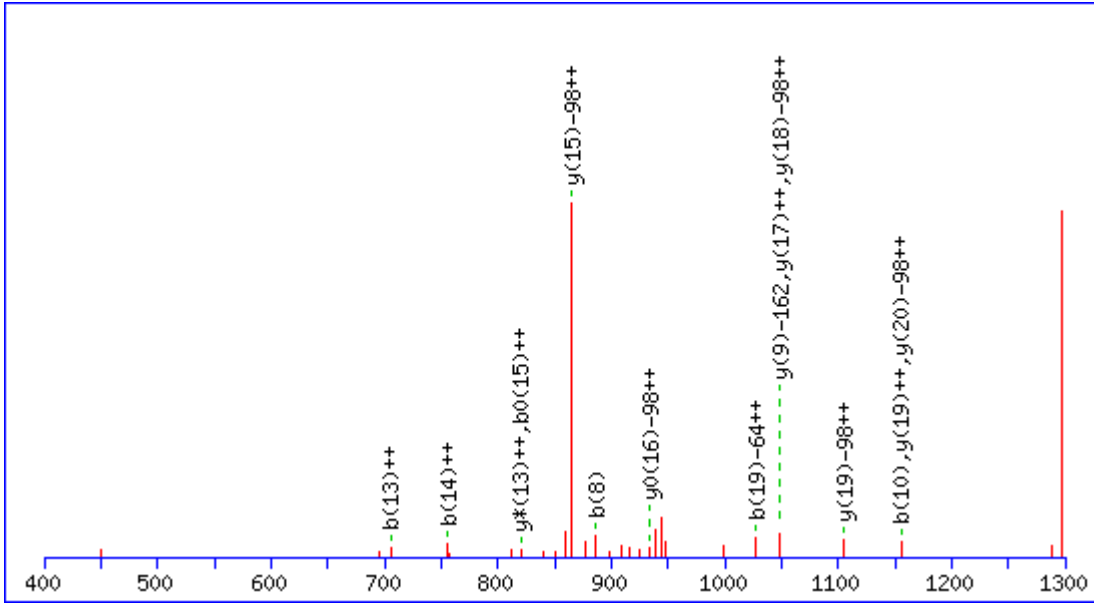

Monoisotopic mass of neutral peptide Mr(calc): 2867.3751

Fixed modifications: Carbamidomethyl (C) (apply to specified residues or termini only)

Variable modifications:

M2 : Oxidation (M), with neutral losses 0.0000(shown in table), 63.9983

M22 : Oxidation (M), with neutral losses 0.0000(shown in table), 63.9983

S23 : Phospho (ST), with neutral losses 97.9769(shown in table), 0.0000

Ions Score: 23 Expect: 0.74 (help)

| #  | b         | b <sup>++</sup> | b <sup>*</sup> | b <sup>+++</sup> | b <sup>0</sup> | b <sup>0++</sup> | Seq. | y         | y <sup>++</sup> | y <sup>*</sup> | y <sup>+++</sup> | y <sup>0</sup> | y <sup>0++</sup> | #  |
|----|-----------|-----------------|----------------|------------------|----------------|------------------|------|-----------|-----------------|----------------|------------------|----------------|------------------|----|
| 1  | 114.0913  | 57.5493         |                |                  |                |                  | I    |           |                 |                |                  |                |                  | 24 |
| 2  | 261.1267  | 131.0670        |                |                  |                |                  | M    | 2657.3214 | 1329.1644       | 2640.2949      | 1320.6511        | 2639.3109      | 1320.1591        | 23 |
| 3  | 348.1588  | 174.5830        |                |                  | 330.1482       | 165.5777         | S    | 2510.2860 | 1255.6467       | 2493.2595      | 1247.1334        | 2492.2755      | 1246.6414        | 22 |
| 4  | 461.2428  | 231.1251        |                |                  | 443.2323       | 222.1198         | I    | 2423.2540 | 1212.1306       | 2406.2275      | 1203.6174        | 2405.2434      | 1203.1254        | 21 |
| 5  | 560.3112  | 280.6593        |                |                  | 542.3007       | 271.6540         | V    | 2310.1699 | 1155.5886       | 2293.1434      | 1147.0753        | 2292.1594      | 1146.5833        | 20 |
| 6  | 675.3382  | 338.1727        |                |                  | 657.3276       | 329.1674         | D    | 2211.1015 | 1106.0544       | 2194.0750      | 1097.5411        | 2193.0910      | 1097.0491        | 19 |
| 7  | 772.3910  | 386.6991        |                |                  | 754.3804       | 377.6938         | P    | 2096.0746 | 1048.5409       | 2079.0480      | 1040.0277        | 2078.0640      | 1039.5357        | 18 |
| 8  | 866.4339  | 443.7206        | 869.4073       | 435.2073         | 868.4233       | 434.7153         | N    | 1999.0218 | 1000.0146       | 1981.9953      | 991.5013         | 1981.0113      | 991.0093         | 17 |
| 9  | 1042.5350 | 521.7711        | 1025.5084      | 513.2579         | 1024.5244      | 512.7659         | R    | 1884.9789 | 942.9931        | 1867.9524      | 934.4798         | 1866.9683      | 933.9878         | 16 |
| 10 | 1155.6191 | 578.3132        | 1138.5925      | 569.7999         | 1137.6085      | 569.3079         | L    | 1728.8778 | 864.9425        | 1711.8512      | 856.4293         | 1710.8672      | 855.9373         | 15 |
| 11 | 1212.6405 | 606.8239        | 1195.6140      | 598.3106         | 1194.6300      | 597.8186         | G    | 1615.7937 | 808.4005        | 1598.7672      | 799.8872         | 1597.7832      | 799.3952         | 14 |
| 12 | 1311.7089 | 656.3581        | 1294.6824      | 647.8448         | 1293.6984      | 647.3528         | V    | 1558.7723 | 779.8898        | 1541.7457      | 771.3765         | 1540.7617      | 770.8845         | 13 |
| 13 | 1410.7773 | 705.8923        | 1393.7508      | 697.3790         | 1392.7668      | 696.8870         | V    | 1459.7038 | 730.3556        | 1442.6773      | 721.8423         | 1441.6933      | 721.3503         | 12 |
| 14 | 1511.8250 | 756.4162        | 1494.7985      | 747.9029         | 1493.8145      | 747.4109         | T    | 1360.6354 | 680.8214        | 1343.6089      | 672.3081         | 1342.6249      | 671.8161         | 11 |
| 15 | 1658.8934 | 829.9504        | 1641.8669      | 821.4371         | 1640.8829      | 820.9451         | F    | 1259.5878 | 630.2975        | 1242.5612      | 621.7842         | 1241.5772      | 621.2922         | 10 |
| 16 | 1786.9520 | 893.9796        | 1769.9255      | 885.4664         | 1768.9415      | 884.9744         | Q    | 1112.5193 | 556.7633        | 1095.4928      | 548.2500         | 1094.5088      | 547.7580         | 9  |
| 17 | 1857.9891 | 929.4982        | 1840.9626      | 920.9849         | 1839.9786      | 920.4929         | A    | 984.4608  | 492.7340        | 967.4342       | 484.2207         | 966.4502       | 483.7287         | 8  |
| 18 | 2005.0575 | 1003.0324       | 1988.0310      | 994.5191         | 1987.0470      | 994.0271         | F    | 913.4237  | 457.2155        | 896.3971       | 448.7022         | 895.4131       | 448.2102         | 7  |
| 19 | 2118.1416 | 1059.5744       | 2101.1151      | 1051.0612        | 2100.1310      | 1050.5692        | I    | 766.3552  | 383.6813        | 749.3287       | 375.1680         | 748.3447       | 374.6760         | 6  |
| 20 | 2233.1686 | 1117.0879       | 2216.1420      | 1108.5746        | 2215.1580      | 1108.0826        | D    | 653.2712  | 327.1392        | 636.2446       | 318.6259         | 635.2606       | 318.1339         | 5  |
| 21 | 2380.2370 | 1190.6221       | 2363.2104      | 1182.1088        | 2362.2264      | 1181.6168        | F    | 538.2442  | 269.6258        | 521.2177       | 261.1125         | 520.2337       | 260.6205         | 4  |
| 22 | 2527.2724 | 1264.1398       | 2510.2458      | 1255.6265        | 2509.2618      | 1255.1345        | M    | 391.1758  | 196.0915        | 374.1493       | 187.5783         | 373.1653       | 187.0863         | 3  |
| 23 | 2596.2938 | 1298.6506       | 2579.2673      | 1290.1373        | 2578.2833      | 1289.6453        | S    | 244.1404  | 122.5738        | 227.1139       | 114.0606         | 226.1299       | 113.5686         | 2  |
| 24 |           |                 |                |                  |                |                  | R    | 175.1190  | 88.0631         | 158.0924       | 79.5498          |                |                  | 1  |

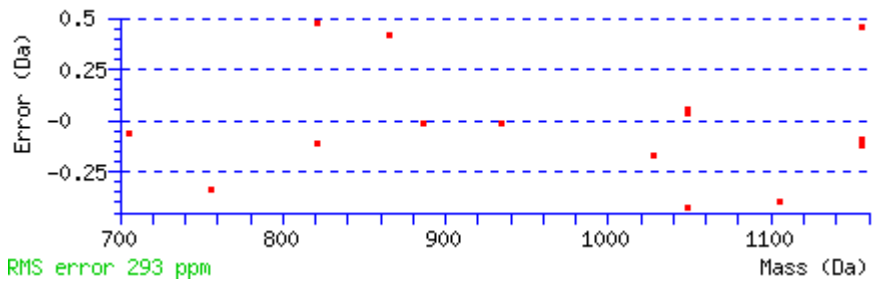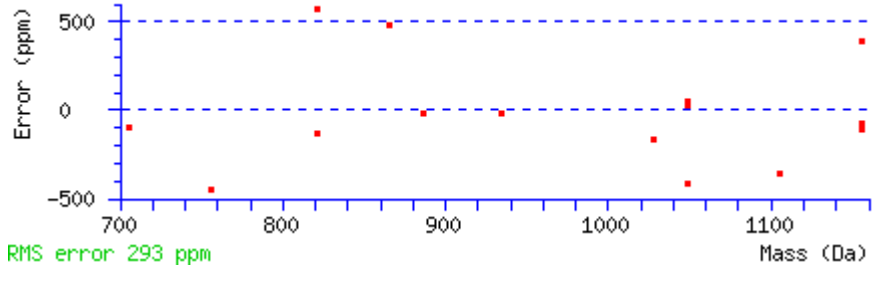

IDENTIFICATION 4

MS/MS Fragmentation of IQSISNSKADLIDTGR

Found in IPI00124283

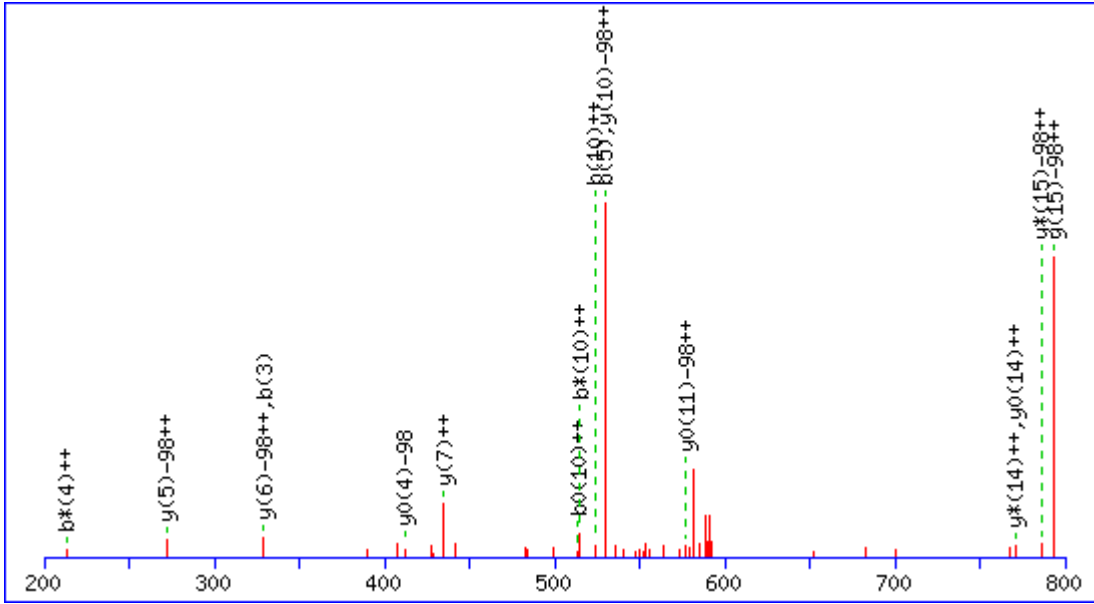

Monoisotopic mass of neutral peptide Mr(calc): 1797.8509

Fixed modifications: Carbamidomethyl (C) (apply to specified residues or termini only)

Variable modifications:

N6 : Deamidated (NQ)

T14 : Phospho (ST), with neutral losses 97.9769 (shown in table), 0.0000

Ions Score: 26 Expect: 0.38 (help)

| #  | b         | b <sup>++</sup> | b <sup>*</sup> | b <sup>+++</sup> | b <sup>0</sup> | b <sup>0++</sup> | Seq. | y         | y <sup>++</sup> | y <sup>*</sup> | y <sup>+++</sup> | y <sup>0</sup> | y <sup>0++</sup> | #  |
|----|-----------|-----------------|----------------|------------------|----------------|------------------|------|-----------|-----------------|----------------|------------------|----------------|------------------|----|
| 1  | 114.0913  | 57.5493         |                |                  |                |                  | I    |           |                 |                |                  |                |                  | 16 |
| 2  | 242.1499  | 121.5786        | 225.1234       | 113.0653         |                |                  | Q    | 1587.7973 | 794.4023        | 1570.7707      | 785.8890         | 1569.7867      | 785.3970         | 15 |
| 3  | 329.1819  | 165.0946        | 312.1554       | 156.5813         | 311.1714       | 156.0893         | S    | 1459.7387 | 730.3730        | 1442.7122      | 721.8597         | 1441.7281      | 721.3677         | 14 |
| 4  | 442.2660  | 221.6366        | 425.2395       | 213.1234         | 424.2554       | 212.6314         | I    | 1372.7067 | 686.8570        | 1355.6801      | 678.3437         | 1354.6961      | 677.8517         | 13 |
| 5  | 529.2980  | 265.1527        | 512.2715       | 256.6394         | 511.2875       | 256.1474         | S    | 1259.6226 | 630.3149        | 1242.5961      | 621.8017         | 1241.6121      | 621.3097         | 12 |
| 6  | 644.3250  | 322.6661        | 627.2984       | 314.1529         | 626.3144       | 313.6608         | N    | 1172.5906 | 586.7989        | 1155.5640      | 578.2857         | 1154.5800      | 577.7937         | 11 |
| 7  | 731.3570  | 366.1821        | 714.3305       | 357.6689         | 713.3464       | 357.1769         | S    | 1057.5636 | 529.2855        | 1040.5371      | 520.7722         | 1039.5531      | 520.2802         | 10 |
| 8  | 859.4520  | 430.2296        | 842.4254       | 421.7163         | 841.4414       | 421.2243         | K    | 970.5316  | 485.7694        | 953.5051       | 477.2562         | 952.5211       | 476.7642         | 9  |
| 9  | 930.4891  | 465.7482        | 913.4625       | 457.2349         | 912.4785       | 456.7429         | A    | 842.4367  | 421.7220        | 825.4101       | 413.2087         | 824.4261       | 412.7167         | 8  |
| 10 | 1045.5160 | 523.2617        | 1028.4895      | 514.7484         | 1027.5055      | 514.2564         | D    | 771.3995  | 386.2034        | 754.3730       | 377.6901         | 753.3890       | 377.1981         | 7  |
| 11 | 1158.6001 | 579.8037        | 1141.5735      | 571.2904         | 1140.5895      | 570.7984         | L    | 656.3726  | 328.6899        | 639.3461       | 320.1767         | 638.3620       | 319.6847         | 6  |
| 12 | 1271.6842 | 636.3457        | 1254.6576      | 627.8324         | 1253.6736      | 627.3404         | I    | 543.2885  | 272.1479        | 526.2620       | 263.6346         | 525.2780       | 263.1426         | 5  |
| 13 | 1386.7111 | 693.8592        | 1369.6846      | 685.3459         | 1368.7005      | 684.8539         | D    | 430.2045  | 215.6059        | 413.1779       | 207.0926         | 412.1939       | 206.6006         | 4  |
| 14 | 1469.7482 | 735.3777        | 1452.7217      | 726.8645         | 1451.7376      | 726.3725         | T    | 315.1775  | 158.0924        | 298.1510       | 149.5791         | 297.1670       | 149.0871         | 3  |
| 15 | 1526.7697 | 763.8885        | 1509.7431      | 755.3752         | 1508.7591      | 754.8832         | G    | 232.1404  | 116.5738        | 215.1139       | 108.0606         |                |                  | 2  |
| 16 |           |                 |                |                  |                |                  | R    | 175.1190  | 88.0631         | 158.0924       | 79.5498          |                |                  | 1  |

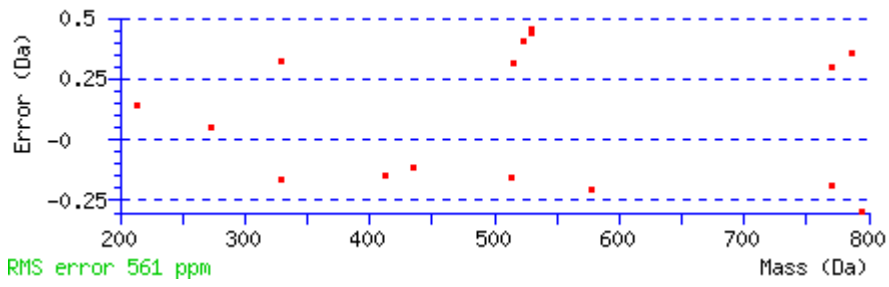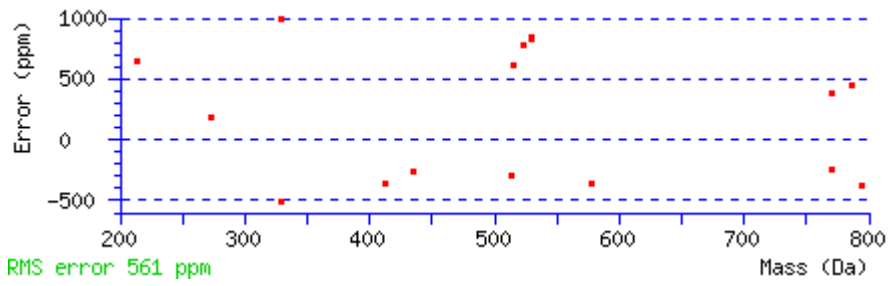

IDENTIFICATION 5

MS/MS Fragmentation of **SETAPAAPAPAEK**

Found in **IPI00223714**

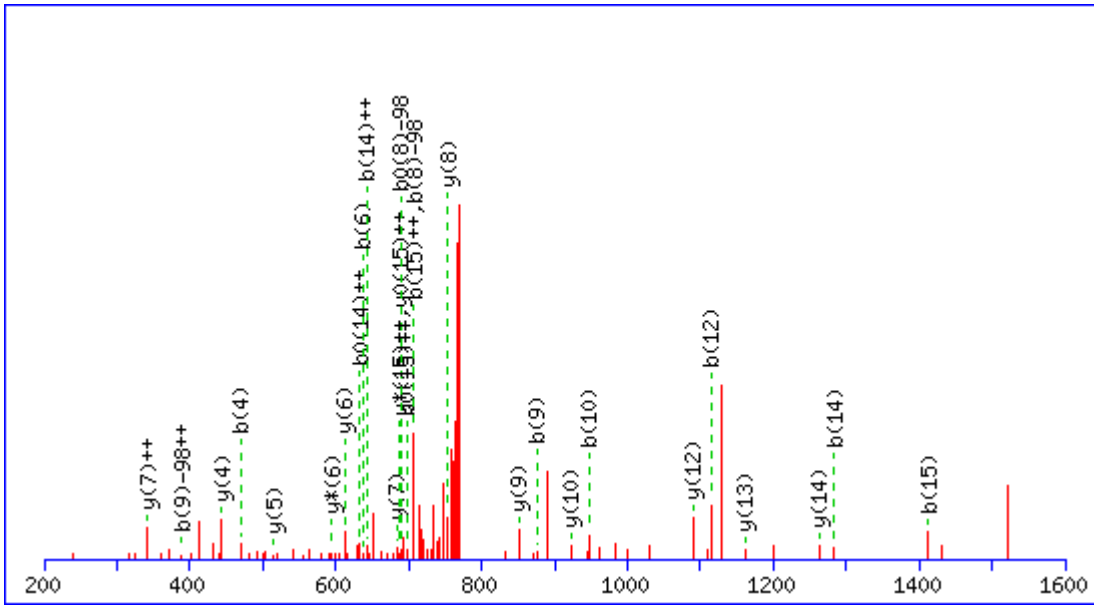

Monoisotopic mass of neutral peptide  $M_r(\text{calc})$ : 1557.7076

Fixed modifications: Carbamidomethyl (C) (apply to specified residues or termini only)

Variable modifications:

S1 : Phospho (ST), with neutral losses 0.0000 (shown in table), 97.9769

Ions Score: 30 Expect: 0.17 (help)

| #  | b         | b <sup>++</sup> | b <sup>0</sup> | b <sup>0++</sup> | Seq. | y         | y <sup>++</sup> | y <sup>*</sup> | y <sup>+++</sup> | y <sup>0</sup> | y <sup>0++</sup> | #  |
|----|-----------|-----------------|----------------|------------------|------|-----------|-----------------|----------------|------------------|----------------|------------------|----|
| 1  | 168.0056  | 84.5065         | 149.9951       | 75.5012          | S    |           |                 |                |                  |                |                  | 16 |
| 2  | 297.0482  | 149.0278        | 279.0377       | 140.0225         | E    | 1391.7165 | 696.3619        | 1374.6900      | 687.8486         | 1373.7060      | 687.3566         | 15 |
| 3  | 398.0959  | 199.5516        | 380.0853       | 190.5463         | T    | 1262.6739 | 631.8406        | 1245.6474      | 623.3273         | 1244.6634      | 622.8353         | 14 |
| 4  | 469.1330  | 235.0701        | 451.1225       | 226.0649         | A    | 1161.6263 | 581.3168        | 1144.5997      | 572.8035         | 1143.6157      | 572.3115         | 13 |
| 5  | 566.1858  | 283.5965        | 548.1752       | 274.5912         | P    | 1090.5891 | 545.7982        | 1073.5626      | 537.2849         | 1072.5786      | 536.7929         | 12 |
| 6  | 637.2229  | 319.1151        | 619.2123       | 310.1098         | A    | 993.5364  | 497.2718        | 976.5098       | 488.7585         | 975.5258       | 488.2665         | 11 |
| 7  | 708.2600  | 354.6336        | 690.2494       | 345.6284         | A    | 922.4993  | 461.7533        | 905.4727       | 453.2400         | 904.4887       | 452.7480         | 10 |
| 8  | 805.3128  | 403.1600        | 787.3022       | 394.1547         | P    | 851.4621  | 426.2347        | 834.4356       | 417.7214         | 833.4516       | 417.2294         | 9  |
| 9  | 876.3499  | 438.6786        | 858.3393       | 429.6733         | A    | 754.4094  | 377.7083        | 737.3828       | 369.1951         | 736.3988       | 368.7030         | 8  |
| 10 | 947.3870  | 474.1971        | 929.3764       | 465.1919         | A    | 683.3723  | 342.1898        | 666.3457       | 333.6765         | 665.3617       | 333.1845         | 7  |
| 11 | 1044.4398 | 522.7235        | 1026.4292      | 513.7182         | P    | 612.3352  | 306.6712        | 595.3086       | 298.1579         | 594.3246       | 297.6659         | 6  |
| 12 | 1115.4769 | 558.2421        | 1097.4663      | 549.2368         | A    | 515.2824  | 258.1448        | 498.2558       | 249.6316         | 497.2718       | 249.1395         | 5  |
| 13 | 1212.5296 | 606.7685        | 1194.5191      | 597.7632         | P    | 444.2453  | 222.6263        | 427.2187       | 214.1130         | 426.2347       | 213.6210         | 4  |
| 14 | 1283.5668 | 642.2870        | 1265.5562      | 633.2817         | A    | 347.1925  | 174.0999        | 330.1660       | 165.5866         | 329.1819       | 165.0946         | 3  |
| 15 | 1412.6094 | 706.8083        | 1394.5988      | 697.8030         | E    | 276.1554  | 138.5813        | 259.1288       | 130.0681         | 258.1448       | 129.5761         | 2  |
| 16 |           |                 |                |                  | K    | 147.1128  | 74.0600         | 130.0863       | 65.5468          |                |                  | 1  |

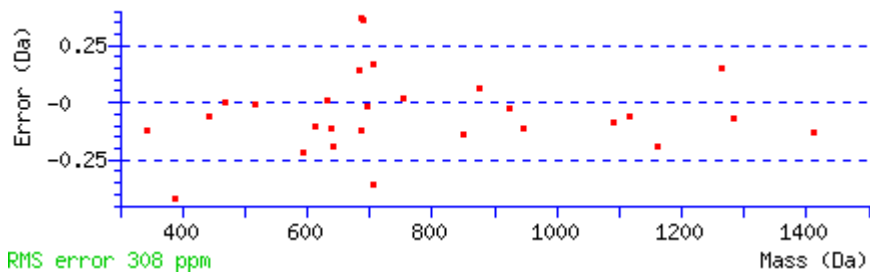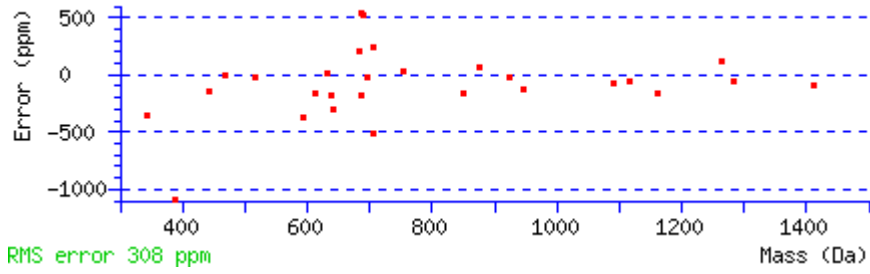





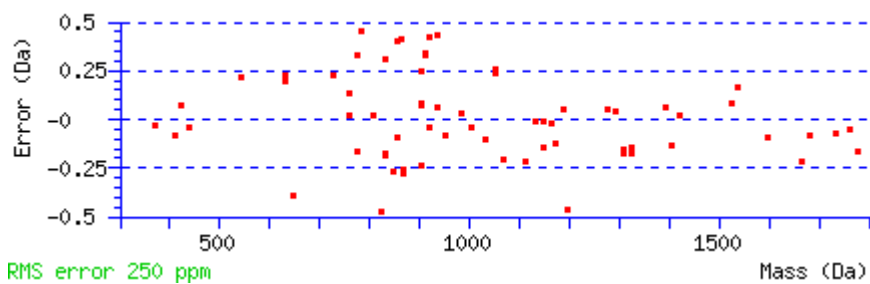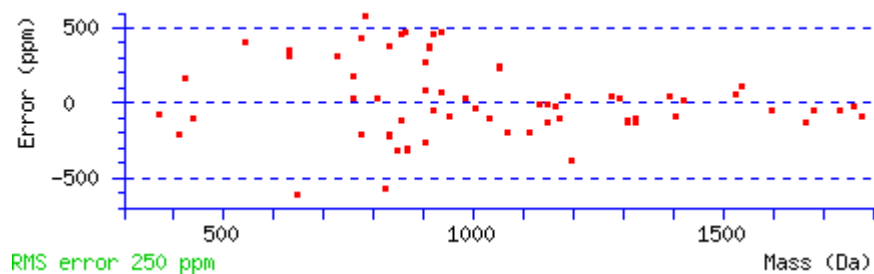

IDENTIFICATION 7

MS/MS Fragmentation of **SLSTSGESLYHVLGLDK**

Found in **IPI00132206**

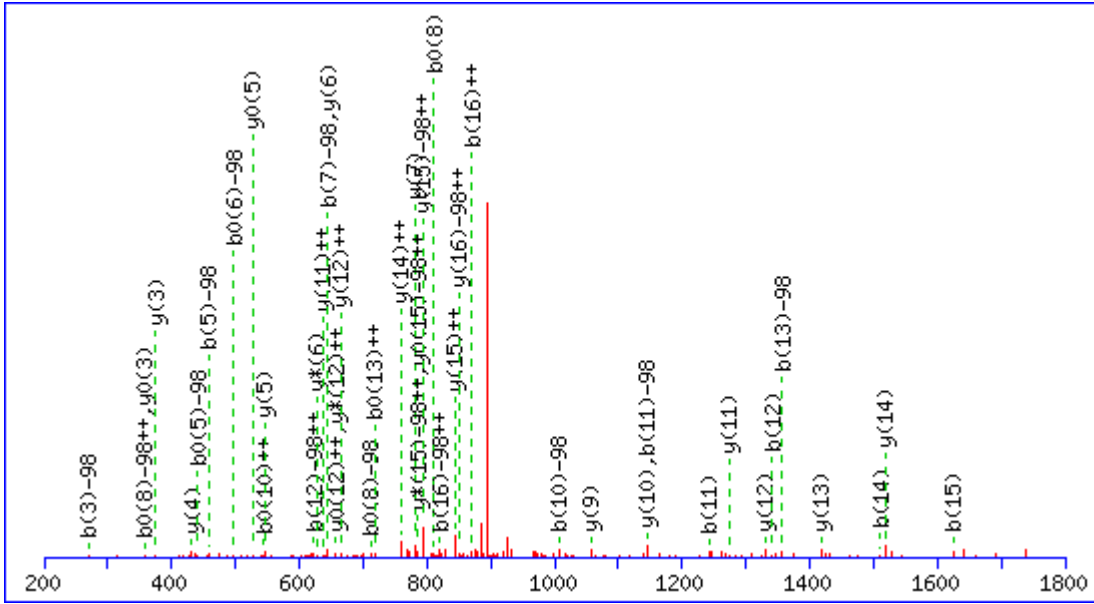

Monoisotopic mass of neutral peptide  $M_r(\text{calc})$ : 1884.8870

Fixed modifications: Carbamidomethyl (C) (apply to specified residues or termini only)

Variable modifications:

S3 : Phospho (ST), with neutral losses 97.9769 (shown in table), 0.0000

Ions Score: 55 Expect: 0.00052 (help)

| #  | b         | b <sup>++</sup> | b <sup>0</sup> | b <sup>0++</sup> | Seq. | y         | y <sup>++</sup> | y <sup>*</sup> | y <sup>+++</sup> | y <sup>0</sup> | y <sup>0++</sup> | #  |
|----|-----------|-----------------|----------------|------------------|------|-----------|-----------------|----------------|------------------|----------------|------------------|----|
| 1  | 88.0393   | 44.5233         | 70.0287        | 35.5180          | S    |           |                 |                |                  |                |                  | 17 |
| 2  | 201.1234  | 101.0653        | 183.1128       | 92.0600          | L    | 1700.8854 | 850.9463        | 1683.8588      | 842.4331         | 1682.8748      | 841.9410         | 16 |
| 3  | 270.1448  | 135.5761        | 252.1343       | 126.5708         | S    | 1587.8013 | 794.4043        | 1570.7748      | 785.8910         | 1569.7907      | 785.3990         | 15 |
| 4  | 371.1925  | 186.0999        | 353.1819       | 177.0946         | T    | 1518.7798 | 759.8936        | 1501.7533      | 751.3803         | 1500.7693      | 750.8883         | 14 |
| 5  | 458.2245  | 229.6159        | 440.2140       | 220.6106         | S    | 1417.7322 | 709.3697        | 1400.7056      | 700.8564         | 1399.7216      | 700.3644         | 13 |
| 6  | 515.2460  | 258.1266        | 497.2354       | 249.1214         | G    | 1330.7001 | 665.8537        | 1313.6736      | 657.3404         | 1312.6896      | 656.8484         | 12 |
| 7  | 644.2886  | 322.6479        | 626.2780       | 313.6427         | E    | 1273.6787 | 637.3430        | 1256.6521      | 628.8297         | 1255.6681      | 628.3377         | 11 |
| 8  | 731.3206  | 366.1639        | 713.3101       | 357.1587         | S    | 1144.6361 | 572.8217        | 1127.6095      | 564.3084         | 1126.6255      | 563.8164         | 10 |
| 9  | 844.4047  | 422.7060        | 826.3941       | 413.7007         | L    | 1057.6041 | 529.3057        | 1040.5775      | 520.7924         | 1039.5935      | 520.3004         | 9  |
| 10 | 1007.4680 | 504.2376        | 989.4575       | 495.2324         | Y    | 944.5200  | 472.7636        | 927.4934       | 464.2504         | 926.5094       | 463.7584         | 8  |
| 11 | 1144.5269 | 572.7671        | 1126.5164      | 563.7618         | H    | 781.4567  | 391.2320        | 764.4301       | 382.7187         | 763.4461       | 382.2267         | 7  |
| 12 | 1243.5953 | 622.3013        | 1225.5848      | 613.2960         | V    | 644.3978  | 322.7025        | 627.3712       | 314.1892         | 626.3872       | 313.6972         | 6  |
| 13 | 1356.6794 | 678.8433        | 1338.6688      | 669.8381         | L    | 545.3293  | 273.1683        | 528.3028       | 264.6550         | 527.3188       | 264.1630         | 5  |
| 14 | 1413.7009 | 707.3541        | 1395.6903      | 698.3488         | G    | 432.2453  | 216.6263        | 415.2187       | 208.1130         | 414.2347       | 207.6210         | 4  |
| 15 | 1526.7849 | 763.8961        | 1508.7744      | 754.8908         | L    | 375.2238  | 188.1155        | 358.1973       | 179.6023         | 357.2132       | 179.1103         | 3  |
| 16 | 1641.8119 | 821.4096        | 1623.8013      | 812.4043         | D    | 262.1397  | 131.5735        | 245.1132       | 123.0602         | 244.1292       | 122.5682         | 2  |
| 17 |           |                 |                |                  | K    | 147.1128  | 74.0600         | 130.0863       | 65.5468          |                |                  | 1  |

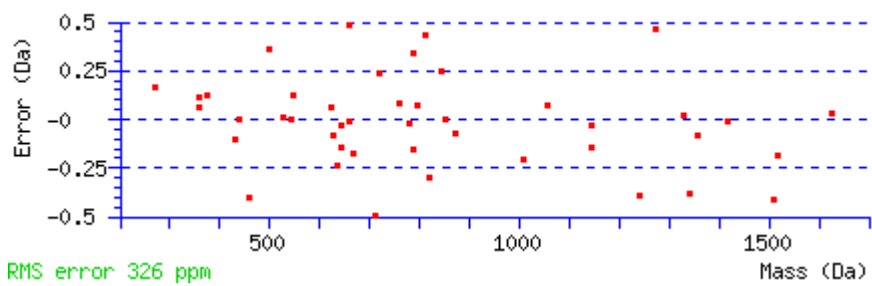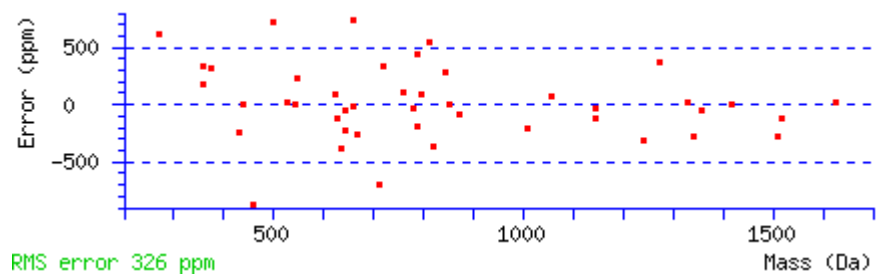

IDENTIFICATION 8

MS/MS Fragmentation of **IPTLEEGLQLPSPTATSQLPLESDAVECLNYQHYK**  
 Found in **IPI00223253**

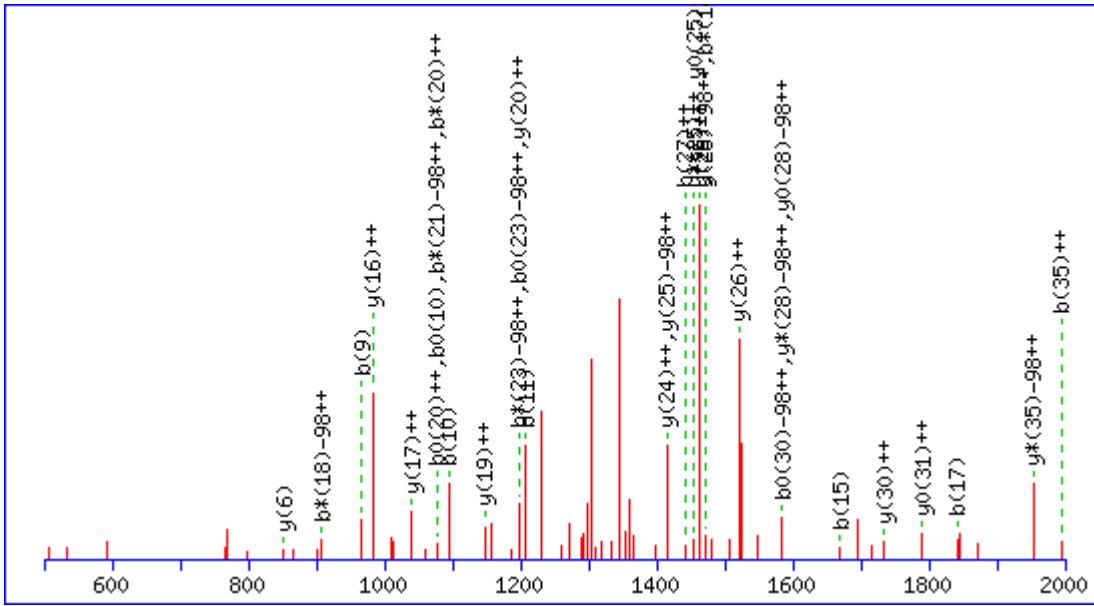

Monoisotopic mass of neutral peptide Mr(calc): 4133.9908

Fixed modifications: Carbamidomethyl (C) (apply to specified residues or termini only)

Variable modifications:

T15 : Phospho (ST), with neutral losses 0.0000(shown in table), 97.9769

Ions Score: 27 Expect: 0.29 (help)

| #  | b         | b <sup>++</sup> | b <sup>*</sup> | b <sup>+++</sup> | b <sup>0</sup> | b <sup>0++</sup> | Seq. | y         | y <sup>++</sup> | y <sup>*</sup> | y <sup>+++</sup> | y <sup>0</sup> | y <sup>0++</sup> | #  |
|----|-----------|-----------------|----------------|------------------|----------------|------------------|------|-----------|-----------------|----------------|------------------|----------------|------------------|----|
| 1  | 114.0913  | 57.5493         |                |                  |                |                  | I    |           |                 |                |                  |                |                  | 36 |
| 2  | 227.1754  | 114.0913        |                |                  |                |                  | I    | 4021.9141 | 2011.4607       | 4004.8875      | 2002.9474        | 4003.9035      | 2002.4554        | 35 |
| 3  | 324.2282  | 162.6177        |                |                  |                |                  | P    | 3908.8300 | 1954.9186       | 3891.8034      | 1946.4054        | 3890.8194      | 1945.9134        | 34 |
| 4  | 425.2758  | 213.1416        |                |                  | 407.2653       | 204.1363         | T    | 3811.7772 | 1906.3923       | 3794.7507      | 1897.8790        | 3793.7667      | 1897.3870        | 33 |
| 5  | 538.3599  | 269.6836        |                |                  | 520.3493       | 260.6783         | L    | 3710.7296 | 1855.8684       | 3693.7030      | 1847.3551        | 3692.7190      | 1846.8631        | 32 |
| 6  | 667.4025  | 334.2049        |                |                  | 649.3919       | 325.1996         | E    | 3597.6455 | 1799.3264       | 3580.6189      | 1790.8131        | 3579.6349      | 1790.3211        | 31 |
| 7  | 796.4451  | 398.7262        |                |                  | 778.4345       | 389.7209         | E    | 3468.6029 | 1734.8051       | 3451.5763      | 1726.2918        | 3450.5923      | 1725.7998        | 30 |
| 8  | 853.4666  | 427.2369        |                |                  | 835.4560       | 418.2316         | G    | 3339.5603 | 1670.2838       | 3322.5338      | 1661.7705        | 3321.5497      | 1661.2785        | 29 |
| 9  | 966.5506  | 483.7790        |                |                  | 948.5401       | 474.7737         | L    | 3282.5388 | 1641.7731       | 3265.5123      | 1633.2598        | 3264.5283      | 1632.7678        | 28 |
| 10 | 1094.6092 | 547.8082        | 1077.5827      | 539.2950         | 1076.5986      | 538.8030         | Q    | 3169.4548 | 1585.2310       | 3152.4282      | 1576.7178        | 3151.4442      | 1576.2257        | 27 |
| 11 | 1207.6933 | 604.3503        | 1190.6667      | 595.8370         | 1189.6827      | 595.3450         | L    | 3041.3962 | 1521.2017       | 3024.3696      | 1512.6885        | 3023.3856      | 1512.1965        | 26 |
| 12 | 1304.7460 | 652.8767        | 1287.7195      | 644.3634         | 1286.7355      | 643.8714         | P    | 2928.3121 | 1464.6597       | 2911.2856      | 1456.1464        | 2910.3016      | 1455.6544        | 25 |
| 13 | 1391.7781 | 696.3927        | 1374.7515      | 687.8794         | 1373.7675      | 687.3874         | S    | 2831.2594 | 1416.1333       | 2814.2328      | 1407.6200        | 2813.2488      | 1407.1280        | 24 |
| 14 | 1488.8308 | 744.9190        | 1471.8043      | 736.4058         | 1470.8203      | 735.9138         | P    | 2744.2273 | 1372.6173       | 2727.2008      | 1364.1040        | 2726.2168      | 1363.6120        | 23 |
| 15 | 1669.8448 | 835.4261        | 1652.8183      | 826.9128         | 1651.8343      | 826.4208         | T    | 2647.1746 | 1324.0909       | 2630.1480      | 1315.5777        | 2629.1640      | 1315.0856        | 22 |
| 16 | 1740.8819 | 870.9446        | 1723.8554      | 862.4313         | 1722.8714      | 861.9393         | A    | 2466.1606 | 1233.5839       | 2449.1340      | 1225.0706        | 2448.1500      | 1224.5786        | 21 |
| 17 | 1841.9296 | 921.4685        | 1824.9031      | 912.9552         | 1823.9191      | 912.4632         | T    | 2395.1235 | 1198.0654       | 2378.0969      | 1189.5521        | 2377.1129      | 1189.0601        | 20 |
| 18 | 1928.9617 | 964.9845        | 1911.9351      | 956.4712         | 1910.9511      | 955.9792         | S    | 2294.0758 | 1147.5415       | 2277.0492      | 1139.0283        | 2276.0652      | 1138.5362        | 19 |
| 19 | 2057.0202 | 1029.0138       | 2039.9937      | 1020.5005        | 2039.0097      | 1020.0085        | Q    | 2207.0437 | 1104.0255       | 2190.0172      | 1095.5122        | 2189.0332      | 1095.0202        | 18 |
| 20 | 2170.1043 | 1085.5558       | 2153.0777      | 1077.0425        | 2152.0937      | 1076.5505        | L    | 2078.9852 | 1039.9962       | 2061.9586      | 1031.4829        | 2060.9746      | 1030.9909        | 17 |
| 21 | 2267.1571 | 1134.0822       | 2250.1305      | 1125.5689        | 2249.1465      | 1125.0769        | P    | 1965.9011 | 983.4542        | 1948.8746      | 974.9409         | 1947.8905      | 974.4489         | 16 |
| 22 | 2380.2411 | 1190.6242       | 2363.2146      | 1182.1109        | 2362.2306      | 1181.6189        | L    | 1868.8483 | 934.9278        | 1851.8218      | 926.4145         | 1850.8378      | 925.9225         | 15 |
| 23 | 2509.2837 | 1255.1455       | 2492.2572      | 1246.6322        | 2491.2732      | 1246.1402        | E    | 1755.7643 | 878.3858        | 1738.7377      | 869.8725         | 1737.7537      | 869.3805         | 14 |
| 24 | 2596.3157 | 1298.6615       | 2579.2892      | 1290.1482        | 2578.3052      | 1289.6562        | S    | 1626.7217 | 813.8645        | 1609.6951      | 805.3512         | 1608.7111      | 804.8592         | 13 |
| 25 | 2711.3427 | 1356.1750       | 2694.3161      | 1347.6617        | 2693.3321      | 1347.1697        | D    | 1539.6897 | 770.3485        | 1522.6631      | 761.8352         | 1521.6791      | 761.3432         | 12 |
| 26 | 2782.3798 | 1391.6935       | 2765.3533      | 1383.1803        | 2764.3692      | 1382.6883        | A    | 1424.6627 | 712.8350        | 1407.6362      | 704.3217         | 1406.6521      | 703.8297         | 11 |
| 27 | 2881.4482 | 1441.2277       | 2864.4217      | 1432.7145        | 2863.4377      | 1432.2225        | V    | 1353.6256 | 677.3164        | 1336.5991      | 668.8032         | 1335.6150      | 668.3112         | 10 |

|    |           |           |           |           |           |           |   |           |          |           |          |           |          |   |
|----|-----------|-----------|-----------|-----------|-----------|-----------|---|-----------|----------|-----------|----------|-----------|----------|---|
| 28 | 3010.4908 | 1505.7490 | 2993.4643 | 1497.2358 | 2992.4802 | 1496.7438 | E | 1254.5572 | 627.7822 | 1237.5306 | 619.2690 | 1236.5466 | 618.7769 | 9 |
| 29 | 3170.5215 | 1585.7644 | 3153.4949 | 1577.2511 | 3152.5109 | 1576.7591 | C | 1125.5146 | 563.2609 | 1108.4880 | 554.7477 |           |          | 8 |
| 30 | 3283.6055 | 1642.3064 | 3266.5790 | 1633.7931 | 3265.5950 | 1633.3011 | L | 965.4839  | 483.2456 | 948.4574  | 474.7323 |           |          | 7 |
| 31 | 3397.6484 | 1699.3279 | 3380.6219 | 1690.8146 | 3379.6379 | 1690.3226 | N | 852.3999  | 426.7036 | 835.3733  | 418.1903 |           |          | 6 |
| 32 | 3560.7118 | 1780.8595 | 3543.6852 | 1772.3463 | 3542.7012 | 1771.8542 | Y | 738.3570  | 369.6821 | 721.3304  | 361.1688 |           |          | 5 |
| 33 | 3688.7704 | 1844.8888 | 3671.7438 | 1836.3755 | 3670.7598 | 1835.8835 | Q | 575.2936  | 288.1504 | 558.2671  | 279.6372 |           |          | 4 |
| 34 | 3825.8293 | 1913.4183 | 3808.8027 | 1904.9050 | 3807.8187 | 1904.4130 | H | 447.2350  | 224.1212 | 430.2085  | 215.6079 |           |          | 3 |
| 35 | 3988.8926 | 1994.9499 | 3971.8660 | 1986.4367 | 3970.8820 | 1985.9447 | Y | 310.1761  | 155.5917 | 293.1496  | 147.0784 |           |          | 2 |
| 36 |           |           |           |           |           |           | K | 147.1128  | 74.0600  | 130.0863  | 65.5468  |           |          | 1 |

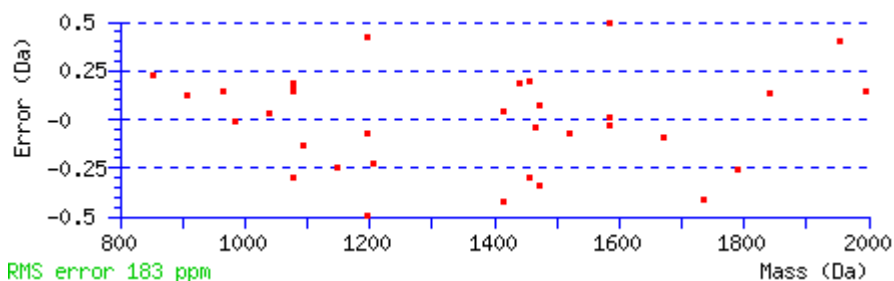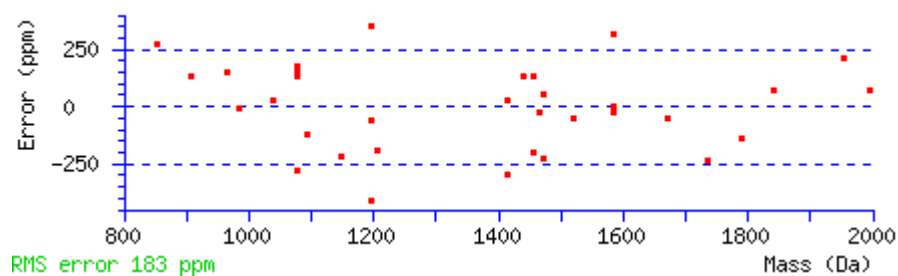



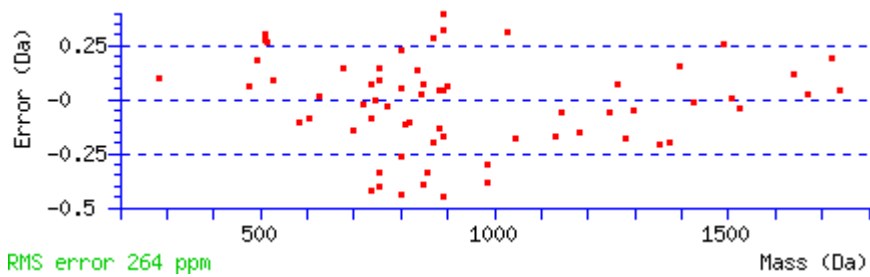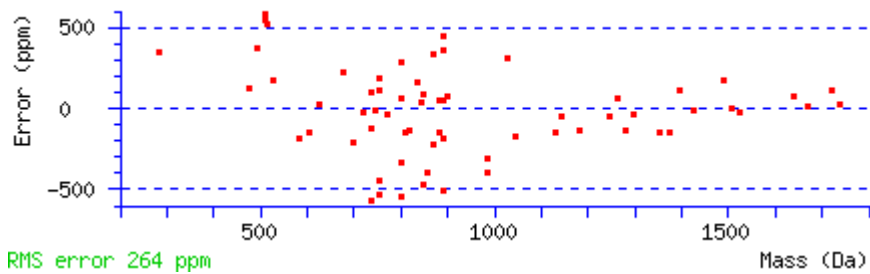





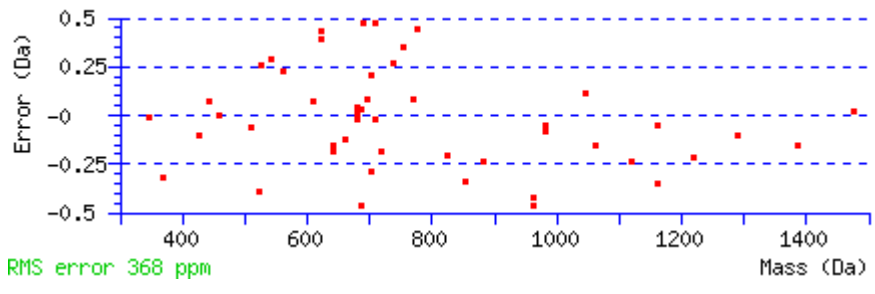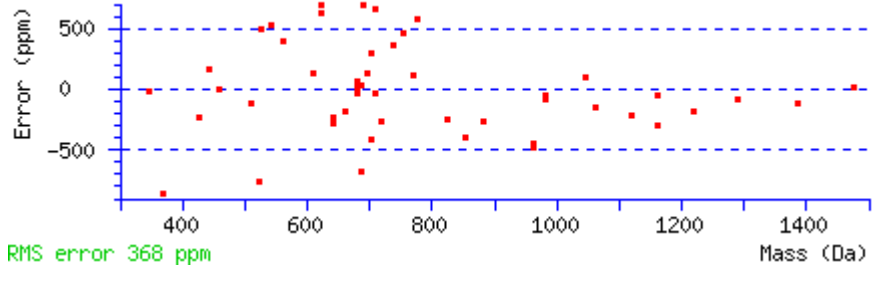

IDENTIFICATION 11

MS/MS Fragmentation of **LAAISRGLELLTVQGQLSGR**

Found in **IPI00117801**

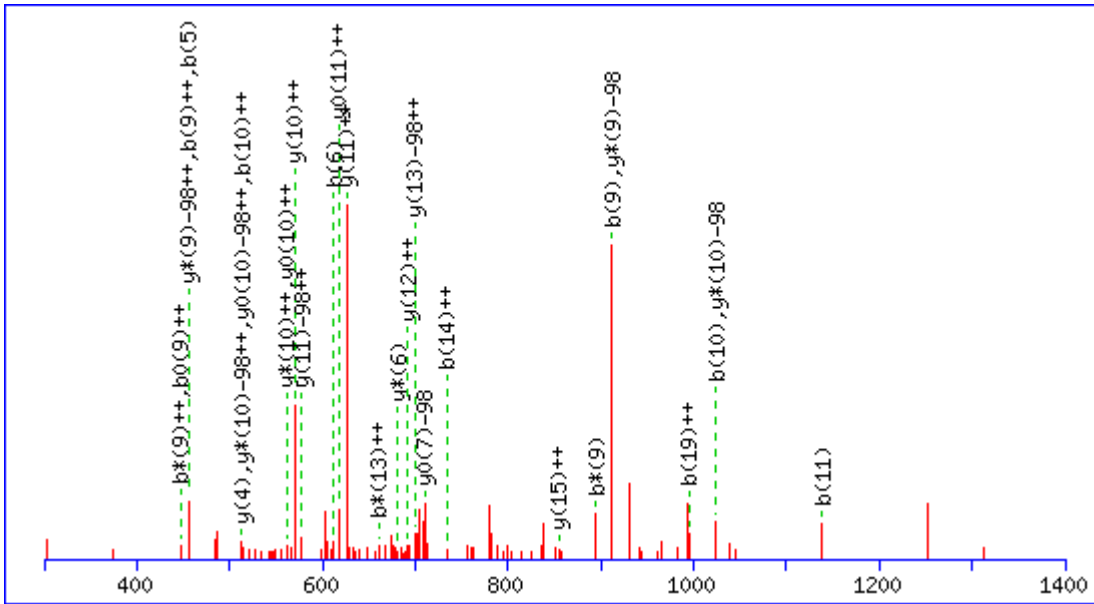

Monoisotopic mass of neutral peptide Mr(calc): 2162.1460

Fixed modifications: Carbamidomethyl (C) (apply to specified residues or termini only)

Variable modifications:

Q16 : Deamidated (NQ)

S18 : Phospho (ST), with neutral losses 0.0000(shown in table), 97.9769

Ions Score: 20 Expect: 0.54 (help)

| #  | b         | b <sup>++</sup> | b <sup>*</sup> | b <sup>+++</sup> | b <sup>0</sup> | b <sup>0++</sup> | Seq. | y         | y <sup>++</sup> | y <sup>*</sup> | y <sup>+++</sup> | y <sup>0</sup> | y <sup>0++</sup> | #  |
|----|-----------|-----------------|----------------|------------------|----------------|------------------|------|-----------|-----------------|----------------|------------------|----------------|------------------|----|
| 1  | 114.0913  | 57.5493         |                |                  |                |                  | L    |           |                 |                |                  |                |                  | 20 |
| 2  | 185.1285  | 93.0679         |                |                  |                |                  | A    | 2050.0692 | 1025.5383       | 2033.0427      | 1017.0250        | 2032.0587      | 1016.5330        | 19 |
| 3  | 256.1656  | 128.5864        |                |                  |                |                  | A    | 1979.0321 | 990.0197        | 1962.0056      | 981.5064         | 1961.0216      | 981.0144         | 18 |
| 4  | 369.2496  | 185.1285        |                |                  |                |                  | I    | 1907.9950 | 954.5011        | 1890.9685      | 945.9879         | 1889.9845      | 945.4959         | 17 |
| 5  | 456.2817  | 228.6445        |                |                  | 438.2711       | 219.6392         | S    | 1794.9110 | 897.9591        | 1777.8844      | 889.4458         | 1776.9004      | 888.9538         | 16 |
| 6  | 612.3828  | 306.6950        | 595.3562       | 298.1817         | 594.3722       | 297.6897         | R    | 1707.8789 | 854.4431        | 1690.8524      | 845.9298         | 1689.8684      | 845.4378         | 15 |
| 7  | 669.4042  | 335.2058        | 652.3777       | 326.6925         | 651.3937       | 326.2005         | G    | 1551.7778 | 776.3925        | 1534.7513      | 767.8793         | 1533.7673      | 767.3873         | 14 |
| 8  | 782.4883  | 391.7478        | 765.4618       | 383.2345         | 764.4777       | 382.7425         | L    | 1494.7564 | 747.8818        | 1477.7298      | 739.3685         | 1476.7458      | 738.8765         | 13 |
| 9  | 911.5309  | 456.2691        | 894.5043       | 447.7558         | 893.5203       | 447.2638         | E    | 1381.6723 | 691.3398        | 1364.6457      | 682.8265         | 1363.6617      | 682.3345         | 12 |
| 10 | 1024.6150 | 512.8111        | 1007.5884      | 504.2978         | 1006.6044      | 503.8058         | L    | 1252.6297 | 626.8185        | 1235.6031      | 618.3052         | 1234.6191      | 617.8132         | 11 |
| 11 | 1137.6990 | 569.3531        | 1120.6725      | 560.8399         | 1119.6885      | 560.3479         | L    | 1139.5456 | 570.2765        | 1122.5191      | 561.7632         | 1121.5351      | 561.2712         | 10 |
| 12 | 1238.7467 | 619.8770        | 1221.7202      | 611.3637         | 1220.7361      | 610.8717         | T    | 1026.4616 | 513.7344        | 1009.4350      | 505.2211         | 1008.4510      | 504.7291         | 9  |
| 13 | 1337.8151 | 669.4112        | 1320.7886      | 660.8979         | 1319.8045      | 660.4059         | V    | 925.4139  | 463.2106        | 908.3873       | 454.6973         | 907.4033       | 454.2053         | 8  |
| 14 | 1465.8737 | 733.4405        | 1448.8471      | 724.9272         | 1447.8631      | 724.4352         | Q    | 826.3455  | 413.6764        | 809.3189       | 405.1631         | 808.3349       | 404.6711         | 7  |
| 15 | 1522.8952 | 761.9512        | 1505.8686      | 753.4379         | 1504.8846      | 752.9459         | G    | 698.2869  | 349.6471        | 681.2603       | 341.1338         | 680.2763       | 340.6418         | 6  |
| 16 | 1651.9377 | 826.4725        | 1634.9112      | 817.9592         | 1633.9272      | 817.4672         | Q    | 641.2654  | 321.1364        | 624.2389       | 312.6231         | 623.2549       | 312.1311         | 5  |
| 17 | 1765.0218 | 883.0145        | 1747.9953      | 874.5013         | 1747.0112      | 874.0093         | L    | 512.2228  | 256.6151        | 495.1963       | 248.1018         | 494.2123       | 247.6098         | 4  |
| 18 | 1932.0202 | 966.5137        | 1914.9936      | 958.0004         | 1914.0096      | 957.5084         | S    | 399.1388  | 200.0730        | 382.1122       | 191.5598         | 381.1282       | 191.0677         | 3  |
| 19 | 1989.0416 | 995.0245        | 1972.0151      | 986.5112         | 1971.0311      | 986.0192         | G    | 232.1404  | 116.5738        | 215.1139       | 108.0606         |                |                  | 2  |
| 20 |           |                 |                |                  |                |                  | R    | 175.1190  | 88.0631         | 158.0924       | 79.5498          |                |                  | 1  |

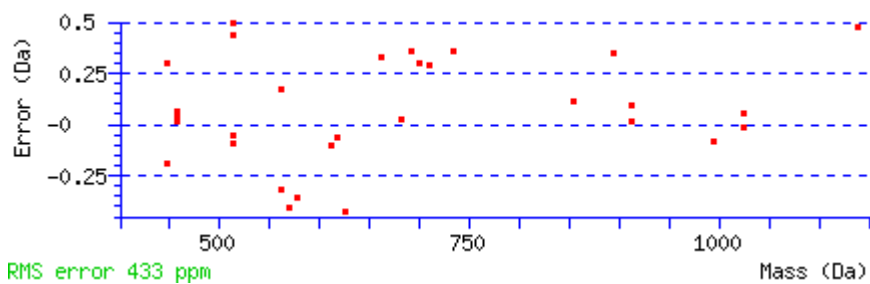

RMS error 433 ppm

Mass (Da)

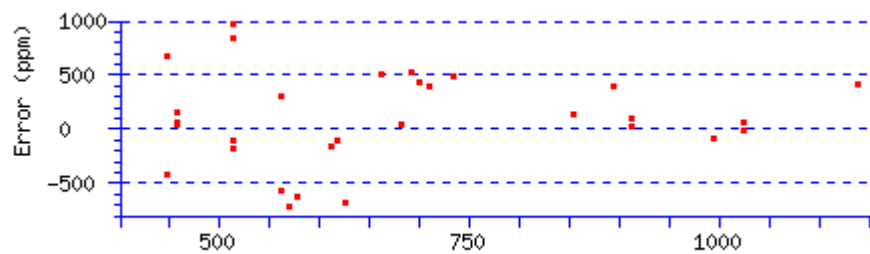

RMS error 433 ppm

Mass (Da)

IDENTIFICATION 12

MS/MS Fragmentation of **ESIPAK**

Found in **IPI00274795**

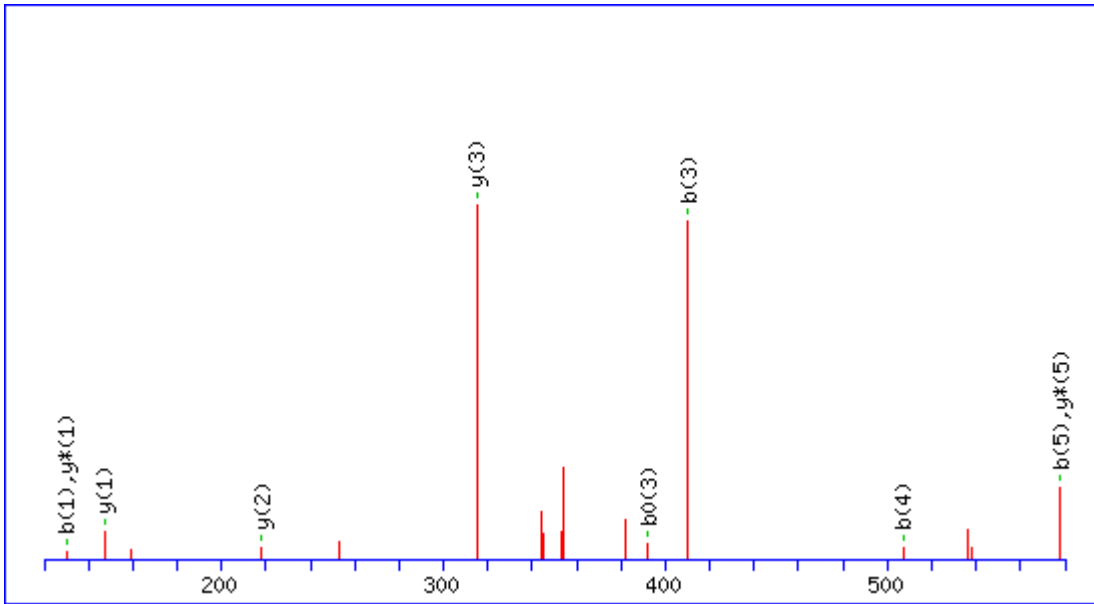

Monoisotopic mass of neutral peptide  $M_r(\text{calc})$ : 723.3204

Fixed modifications: Carbamidomethyl (C) (apply to specified residues or termini only)

Variable modifications:

S2 : Phospho (ST), with neutral losses 0.0000 (shown in table), 97.9769

Ions Score: 30 Expect: 0.057 (help)

| # | b        | b <sup>++</sup> | b <sup>0</sup> | b <sup>0++</sup> | Seq. | y        | y <sup>++</sup> | y <sup>*</sup> | y <sup>+++</sup> | y <sup>0</sup> | y <sup>0++</sup> | # |
|---|----------|-----------------|----------------|------------------|------|----------|-----------------|----------------|------------------|----------------|------------------|---|
| 1 | 130.0499 | 65.5286         | 112.0393       | 56.5233          | E    |          |                 |                |                  |                |                  | 6 |
| 2 | 297.0482 | 149.0278        | 279.0377       | 140.0225         | S    | 595.2851 | 298.1462        | 578.2586       | 289.6329         | 577.2745       | 289.1409         | 5 |
| 3 | 410.1323 | 205.5698        | 392.1217       | 196.5645         | I    | 428.2867 | 214.6470        | 411.2602       | 206.1337         |                |                  | 4 |
| 4 | 507.1851 | 254.0962        | 489.1745       | 245.0909         | P    | 315.2027 | 158.1050        | 298.1761       | 149.5917         |                |                  | 3 |
| 5 | 578.2222 | 289.6147        | 560.2116       | 280.6094         | A    | 218.1499 | 109.5786        | 201.1234       | 101.0653         |                |                  | 2 |
| 6 |          |                 |                |                  | K    | 147.1128 | 74.0600         | 130.0863       | 65.5468          |                |                  | 1 |

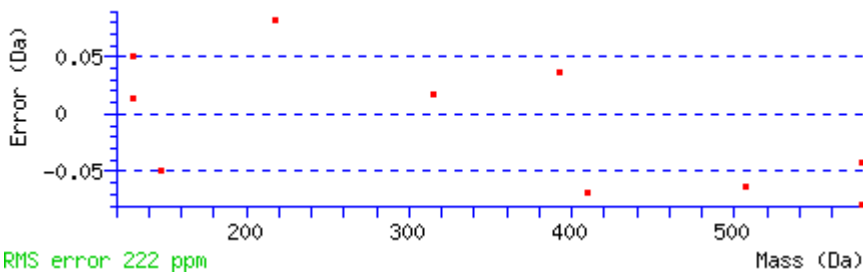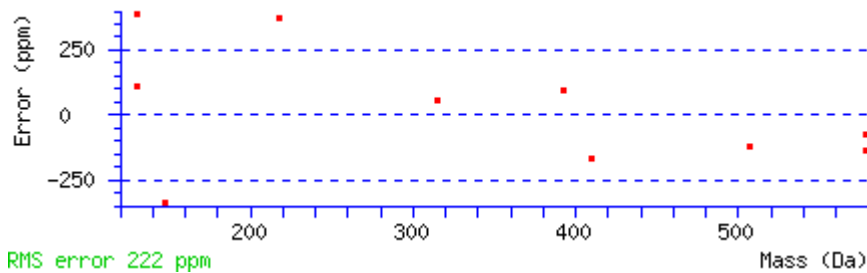

IDENTIFICATION 13

MS/MS Fragmentation of **NYQQNYQNSSEGEKNEGSESAPEGQAQQR**

Found in **IPI00120886**

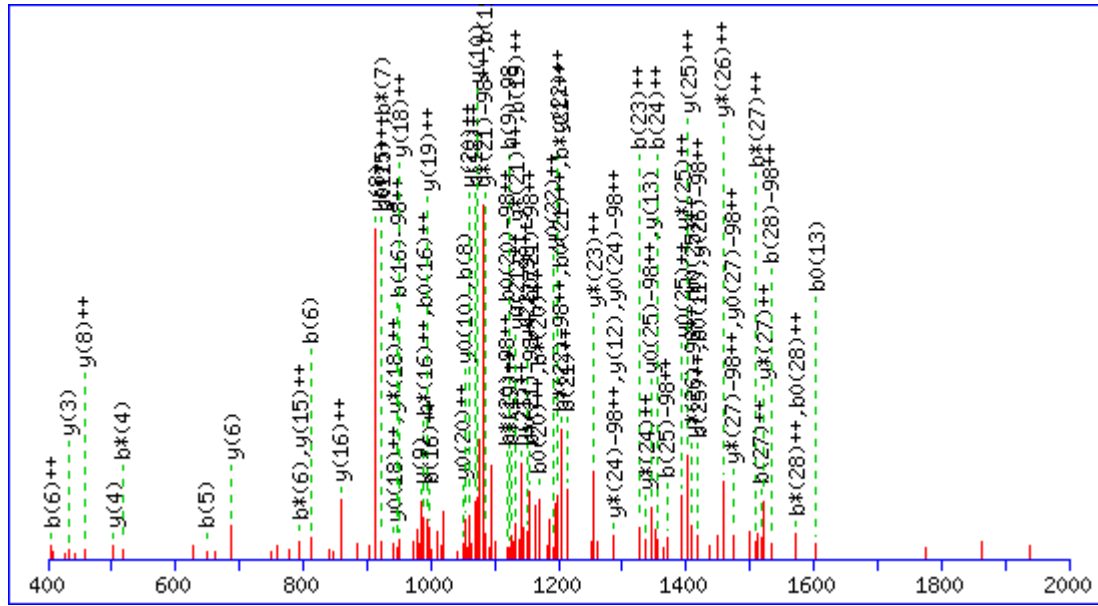

Monoisotopic mass of neutral peptide Mr(calc): 3336.3552

Fixed modifications: Carbamidomethyl (C) (apply to specified residues or termini only)

Variable modifications:

S9 : Phospho (ST), with neutral losses 0.0000(shown in table), 97.9769

Ions Score: 52 Expect: 0.0016 (help)

| #  | b         | b <sup>++</sup> | b <sup>*</sup> | b <sup>+++</sup> | b <sup>0</sup> | b <sup>0++</sup> | Seq. | y         | y <sup>++</sup> | y <sup>*</sup> | y <sup>+++</sup> | y <sup>0</sup> | y <sup>0++</sup> | #  |
|----|-----------|-----------------|----------------|------------------|----------------|------------------|------|-----------|-----------------|----------------|------------------|----------------|------------------|----|
| 1  | 115.0502  | 58.0287         | 98.0237        | 49.5155          |                |                  | N    |           |                 |                |                  |                |                  | 29 |
| 2  | 278.1135  | 139.5604        | 261.0870       | 131.0471         |                |                  | Y    | 3223.3196 | 1612.1634       | 3206.2931      | 1603.6502        | 3205.3090      | 1603.1582        | 28 |
| 3  | 406.1721  | 203.5897        | 389.1456       | 195.0764         |                |                  | Q    | 3060.2563 | 1530.6318       | 3043.2297      | 1522.1185        | 3042.2457      | 1521.6265        | 27 |
| 4  | 534.2307  | 267.6190        | 517.2041       | 259.1057         |                |                  | Q    | 2932.1977 | 1466.6025       | 2915.1712      | 1458.0892        | 2914.1871      | 1457.5972        | 26 |
| 5  | 648.2736  | 324.6404        | 631.2471       | 316.1272         |                |                  | N    | 2804.1391 | 1402.5732       | 2787.1126      | 1394.0599        | 2786.1286      | 1393.5679        | 25 |
| 6  | 811.3369  | 406.1721        | 794.3104       | 397.6588         |                |                  | Y    | 2690.0962 | 1345.5517       | 2673.0697      | 1337.0385        | 2672.0856      | 1336.5465        | 24 |
| 7  | 939.3955  | 470.2014        | 922.3690       | 461.6881         |                |                  | Q    | 2527.0329 | 1264.0201       | 2510.0063      | 1255.5068        | 2509.0223      | 1255.0148        | 23 |
| 8  | 1053.4384 | 527.2229        | 1036.4119      | 518.7096         |                |                  | N    | 2398.9743 | 1199.9908       | 2381.9477      | 1191.4775        | 2380.9637      | 1190.9855        | 22 |
| 9  | 1220.4368 | 610.7220        | 1203.4103      | 602.2088         | 1202.4262      | 601.7168         | S    | 2284.9314 | 1142.9693       | 2267.9048      | 1134.4560        | 2266.9208      | 1133.9640        | 21 |
| 10 | 1349.4794 | 675.2433        | 1332.4529      | 666.7301         | 1331.4688      | 666.2381         | E    | 2117.9330 | 1059.4701       | 2100.9065      | 1050.9569        | 2099.9224      | 1050.4649        | 20 |
| 11 | 1436.5114 | 718.7594        | 1419.4849      | 710.2461         | 1418.5009      | 709.7541         | S    | 1988.8904 | 994.9488        | 1971.8639      | 986.4356         | 1970.8799      | 985.9436         | 19 |
| 12 | 1493.5329 | 747.2701        | 1476.5063      | 738.7568         | 1475.5223      | 738.2648         | G    | 1901.8584 | 951.4328        | 1884.8318      | 942.9196         | 1883.8478      | 942.4275         | 18 |
| 13 | 1622.5755 | 811.7914        | 1605.5489      | 803.2781         | 1604.5649      | 802.7861         | E    | 1844.8369 | 922.9221        | 1827.8104      | 914.4088         | 1826.8264      | 913.9168         | 17 |
| 14 | 1750.6704 | 875.8389        | 1733.6439      | 867.3256         | 1732.6599      | 866.8336         | K    | 1715.7943 | 858.4008        | 1698.7678      | 849.8875         | 1697.7838      | 849.3955         | 16 |
| 15 | 1864.7134 | 932.8603        | 1847.6868      | 924.3471         | 1846.7028      | 923.8550         | N    | 1587.6994 | 794.3533        | 1570.6728      | 785.8400         | 1569.6888      | 785.3480         | 15 |
| 16 | 1993.7560 | 997.3816        | 1976.7294      | 988.8683         | 1975.7454      | 988.3763         | E    | 1473.6564 | 737.3319        | 1456.6299      | 728.8186         | 1455.6459      | 728.3266         | 14 |
| 17 | 2050.7774 | 1025.8924       | 2033.7509      | 1017.3791        | 2032.7669      | 1016.8871        | G    | 1344.6138 | 672.8106        | 1327.5873      | 664.2973         | 1326.6033      | 663.8053         | 13 |
| 18 | 2137.8095 | 1069.4084       | 2120.7829      | 1060.8951        | 2119.7989      | 1060.4031        | S    | 1287.5924 | 644.2998        | 1270.5658      | 635.7866         | 1269.5818      | 635.2945         | 12 |
| 19 | 2266.8521 | 1133.9297       | 2249.8255      | 1125.4164        | 2248.8415      | 1124.9244        | E    | 1200.5604 | 600.7838        | 1183.5338      | 592.2705         | 1182.5498      | 591.7785         | 11 |
| 20 | 2353.8841 | 1177.4457       | 2336.8575      | 1168.9324        | 2335.8735      | 1168.4404        | S    | 1071.5178 | 536.2625        | 1054.4912      | 527.7492         | 1053.5072      | 527.2572         | 10 |
| 21 | 2424.9212 | 1212.9642       | 2407.8946      | 1204.4510        | 2406.9106      | 1203.9590        | A    | 984.4857  | 492.7465        | 967.4592       | 484.2332         | 966.4752       | 483.7412         | 9  |
| 22 | 2521.9740 | 1261.4906       | 2504.9474      | 1252.9773        | 2503.9634      | 1252.4853        | P    | 913.4486  | 457.2279        | 896.4221       | 448.7147         | 895.4381       | 448.2227         | 8  |
| 23 | 2651.0166 | 1326.0119       | 2633.9900      | 1317.4986        | 2633.0060      | 1317.0066        | E    | 816.3959  | 408.7016        | 799.3693       | 400.1883         | 798.3853       | 399.6963         | 7  |
| 24 | 2708.0380 | 1354.5226       | 2691.0115      | 1346.0094        | 2690.0275      | 1345.5174        | G    | 687.3533  | 344.1803        | 670.3267       | 335.6670         |                |                  | 6  |
| 25 | 2836.0966 | 1418.5519       | 2819.0700      | 1410.0387        | 2818.0860      | 1409.5467        | Q    | 630.3318  | 315.6695        | 613.3053       | 307.1563         |                |                  | 5  |
| 26 | 2907.1337 | 1454.0705       | 2890.1072      | 1445.5572        | 2889.1231      | 1445.0652        | A    | 502.2732  | 251.6402        | 485.2467       | 243.1270         |                |                  | 4  |
| 27 | 3035.1923 | 1518.0998       | 3018.1657      | 1509.5865        | 3017.1817      | 1509.0945        | Q    | 431.2361  | 216.1217        | 414.2096       | 207.6084         |                |                  | 3  |

|    |           |           |           |           |           |           |   |          |          |          |          |  |  |   |
|----|-----------|-----------|-----------|-----------|-----------|-----------|---|----------|----------|----------|----------|--|--|---|
| 28 | 3163.2509 | 1582.1291 | 3146.2243 | 1573.6158 | 3145.2403 | 1573.1238 | Q | 303.1775 | 152.0924 | 286.1510 | 143.5791 |  |  | 2 |
| 29 |           |           |           |           |           |           | R | 175.1190 | 88.0631  | 158.0924 | 79.5498  |  |  | 1 |

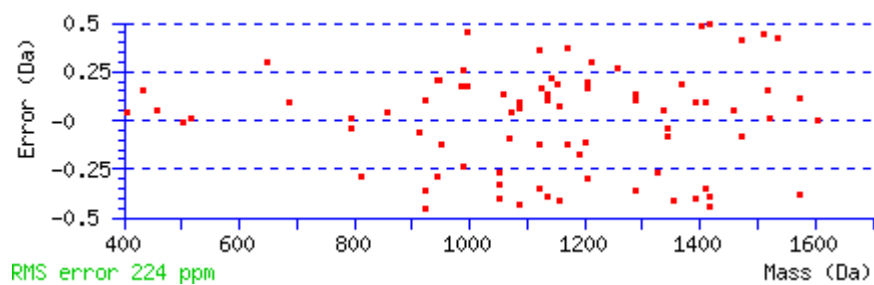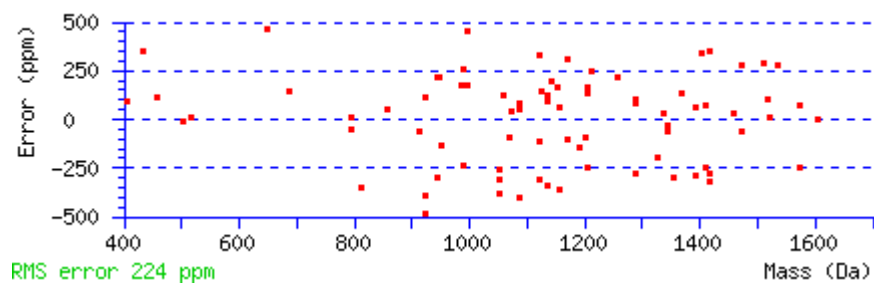

IDENTIFICATION 14

MS/MS Fragmentation of IEDVGSDEEDDSGKDK

Found in IPI00229080

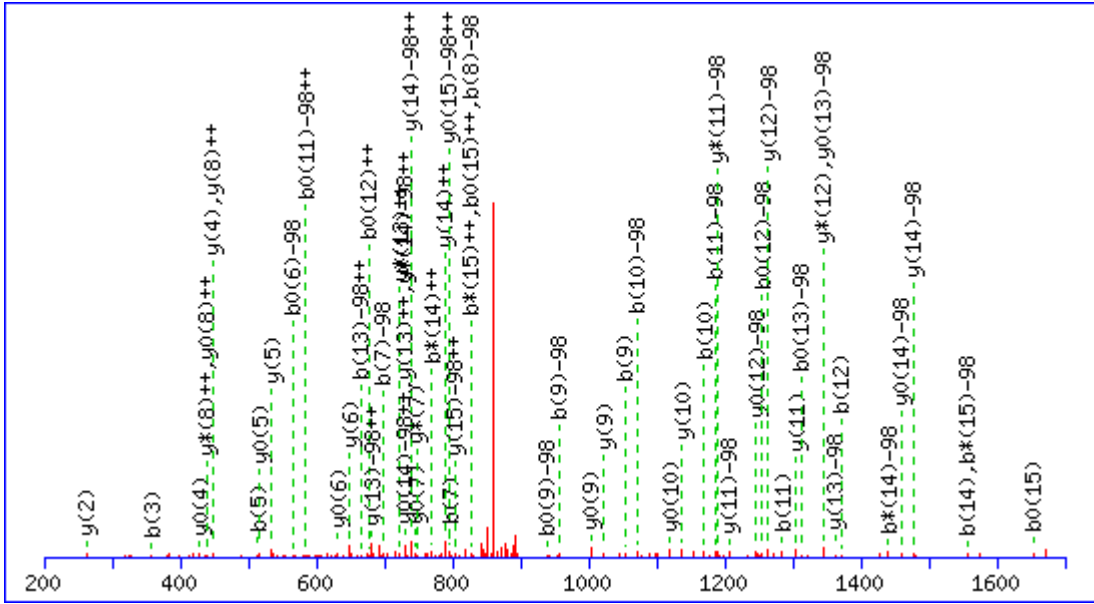

Monoisotopic mass of neutral peptide Mr(calc): 1816.6888

Fixed modifications: Carbamidomethyl (C) (apply to specified residues or termini only)

Variable modifications:

S6 : Phospho (ST), with neutral losses 97.9769 (shown in table), 0.0000

Ions Score: 55 Expect: 0.00035 (help)

| #  | b         | b <sup>++</sup> | b <sup>*</sup> | b <sup>+++</sup> | b <sup>0</sup> | b <sup>0++</sup> | Seq. | y         | y <sup>++</sup> | y <sup>*</sup> | y <sup>+++</sup> | y <sup>0</sup> | y <sup>0++</sup> | #  |
|----|-----------|-----------------|----------------|------------------|----------------|------------------|------|-----------|-----------------|----------------|------------------|----------------|------------------|----|
| 1  | 114.0913  | 57.5493         |                |                  |                |                  | I    |           |                 |                |                  |                |                  | 16 |
| 2  | 243.1339  | 122.0706        |                |                  | 225.1234       | 113.0653         | E    | 1606.6351 | 803.8212        | 1589.6085      | 795.3079         | 1588.6245      | 794.8159         | 15 |
| 3  | 358.1609  | 179.5841        |                |                  | 340.1503       | 170.5788         | D    | 1477.5925 | 739.2999        | 1460.5660      | 730.7866         | 1459.5819      | 730.2946         | 14 |
| 4  | 457.2293  | 229.1183        |                |                  | 439.2187       | 220.1130         | V    | 1362.5656 | 681.7864        | 1345.5390      | 673.2731         | 1344.5550      | 672.7811         | 13 |
| 5  | 514.2508  | 257.6290        |                |                  | 496.2402       | 248.6237         | G    | 1263.4971 | 632.2522        | 1246.4706      | 623.7389         | 1245.4866      | 623.2469         | 12 |
| 6  | 583.2722  | 292.1397        |                |                  | 565.2617       | 283.1345         | S    | 1206.4757 | 603.7415        | 1189.4491      | 595.2282         | 1188.4651      | 594.7362         | 11 |
| 7  | 698.2992  | 349.6532        |                |                  | 680.2886       | 340.6479         | D    | 1137.4542 | 569.2307        | 1120.4277      | 560.7175         | 1119.4437      | 560.2255         | 10 |
| 8  | 827.3418  | 414.1745        |                |                  | 809.3312       | 405.1692         | E    | 1022.4273 | 511.7173        | 1005.4007      | 503.2040         | 1004.4167      | 502.7120         | 9  |
| 9  | 956.3843  | 478.6958        |                |                  | 938.3738       | 469.6905         | E    | 893.3847  | 447.1960        | 876.3581       | 438.6827         | 875.3741       | 438.1907         | 8  |
| 10 | 1071.4113 | 536.2093        |                |                  | 1053.4007      | 527.2040         | D    | 764.3421  | 382.6747        | 747.3155       | 374.1614         | 746.3315       | 373.6694         | 7  |
| 11 | 1186.4382 | 593.7228        |                |                  | 1168.4277      | 584.7175         | D    | 649.3151  | 325.1612        | 632.2886       | 316.6479         | 631.3046       | 316.1559         | 6  |
| 12 | 1273.4703 | 637.2388        |                |                  | 1255.4597      | 628.2335         | S    | 534.2882  | 267.6477        | 517.2617       | 259.1345         | 516.2776       | 258.6425         | 5  |
| 13 | 1330.4917 | 665.7495        |                |                  | 1312.4812      | 656.7442         | G    | 447.2562  | 224.1317        | 430.2296       | 215.6185         | 429.2456       | 215.1264         | 4  |
| 14 | 1458.5867 | 729.7970        | 1441.5601      | 721.2837         | 1440.5761      | 720.7917         | K    | 390.2347  | 195.6210        | 373.2082       | 187.1077         | 372.2241       | 186.6157         | 3  |
| 15 | 1573.6136 | 787.3105        | 1556.5871      | 778.7972         | 1555.6031      | 778.3052         | D    | 262.1397  | 131.5735        | 245.1132       | 123.0602         | 244.1292       | 122.5682         | 2  |
| 16 |           |                 |                |                  |                |                  | K    | 147.1128  | 74.0600         | 130.0863       | 65.5468          |                |                  | 1  |



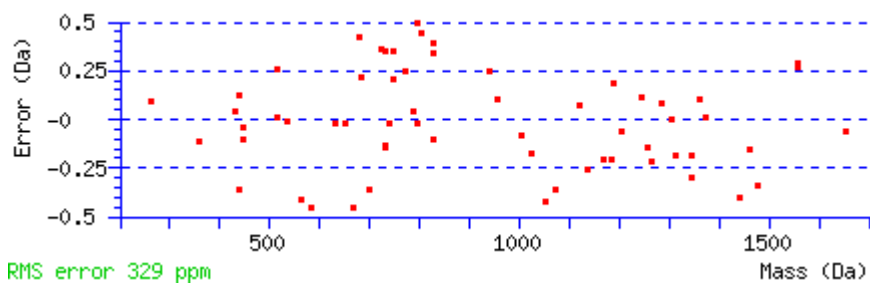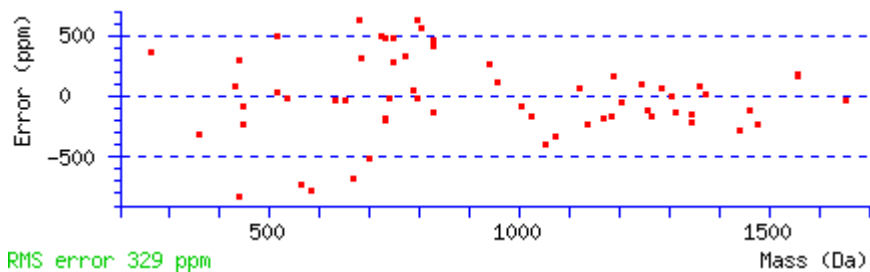

IDENTIFICATION 15

MS/MS Fragmentation of **VVDYSQFQESDDADEYGR**

Found in **IPI00341869**

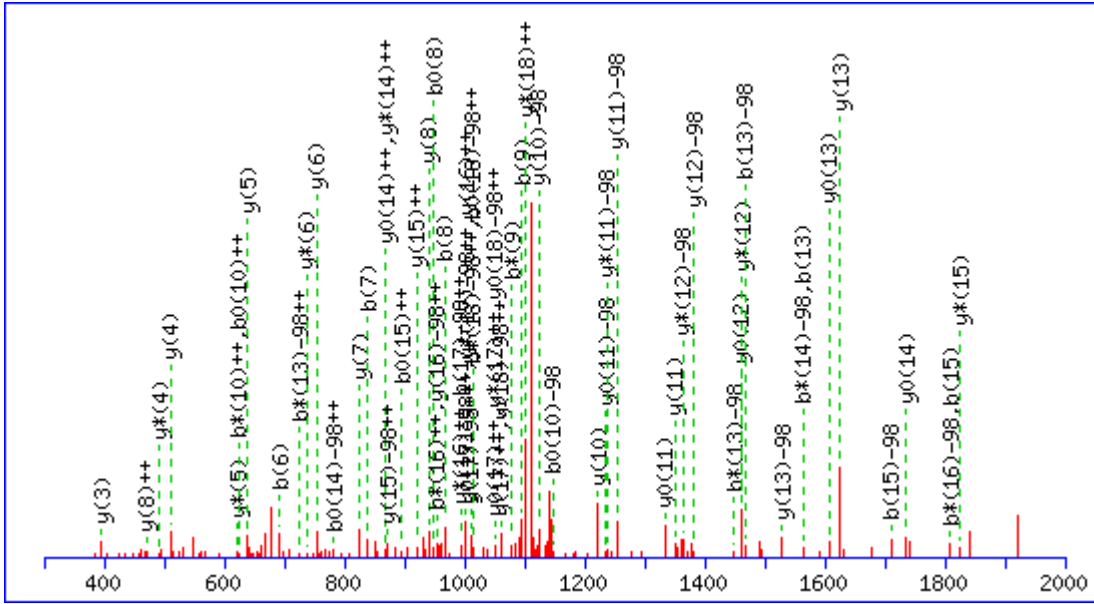

Monoisotopic mass of neutral peptide Mr(calc): 2316.8696

Fixed modifications: Carbamidomethyl (C) (apply to specified residues or termini only)

Variable modifications:

S10 : Phospho (ST), with neutral losses 97.9769 (shown in table), 0.0000

Ions Score: 36 Expect: 0.029 (help)

| #  | b         | b <sup>++</sup> | b <sup>*</sup> | b <sup>+++</sup> | b <sup>0</sup> | b <sup>0++</sup> | Seq. | y         | y <sup>++</sup> | y <sup>*</sup> | y <sup>+++</sup> | y <sup>0</sup> | y <sup>0++</sup> | #  |
|----|-----------|-----------------|----------------|------------------|----------------|------------------|------|-----------|-----------------|----------------|------------------|----------------|------------------|----|
| 1  | 100.0757  | 50.5415         |                |                  |                |                  | V    |           |                 |                |                  |                |                  | 19 |
| 2  | 199.1441  | 100.0757        |                |                  |                |                  | V    | 2120.8316 | 1060.9194       | 2103.8050      | 1052.4061        | 2102.8210      | 1051.9141        | 18 |
| 3  | 314.1710  | 157.5892        |                |                  | 296.1605       | 148.5839         | D    | 2021.7631 | 1011.3852       | 2004.7366      | 1002.8719        | 2003.7526      | 1002.3799        | 17 |
| 4  | 477.2344  | 239.1208        |                |                  | 459.2238       | 230.1155         | Y    | 1906.7362 | 953.8717        | 1889.7097      | 945.3585         | 1888.7256      | 944.8665         | 16 |
| 5  | 564.2664  | 282.6368        |                |                  | 546.2558       | 273.6316         | S    | 1743.6729 | 872.3401        | 1726.6463      | 863.8268         | 1725.6623      | 863.3348         | 15 |
| 6  | 692.3250  | 346.6661        | 675.2984       | 338.1529         | 674.3144       | 337.6608         | Q    | 1656.6409 | 828.8241        | 1639.6143      | 820.3108         | 1638.6303      | 819.8188         | 14 |
| 7  | 839.3934  | 420.2003        | 822.3668       | 411.6871         | 821.3828       | 411.1951         | F    | 1528.5823 | 764.7948        | 1511.5557      | 756.2815         | 1510.5717      | 755.7895         | 13 |
| 8  | 967.4520  | 484.2296        | 950.4254       | 475.7164         | 949.4414       | 475.2243         | Q    | 1381.5139 | 691.2606        | 1364.4873      | 682.7473         | 1363.5033      | 682.2553         | 12 |
| 9  | 1096.4946 | 548.7509        | 1079.4680      | 540.2376         | 1078.4840      | 539.7456         | E    | 1253.4553 | 627.2313        | 1236.4287      | 618.7180         | 1235.4447      | 618.2260         | 11 |
| 10 | 1165.5160 | 583.2617        | 1148.4895      | 574.7484         | 1147.5055      | 574.2564         | S    | 1124.4127 | 562.7100        | 1107.3861      | 554.1967         | 1106.4021      | 553.7047         | 10 |
| 11 | 1280.5430 | 640.7751        | 1263.5164      | 632.2619         | 1262.5324      | 631.7698         | D    | 1055.3912 | 528.1993        | 1038.3647      | 519.6860         | 1037.3807      | 519.1940         | 9  |
| 12 | 1395.5699 | 698.2886        | 1378.5434      | 689.7753         | 1377.5594      | 689.2833         | D    | 940.3643  | 470.6858        | 923.3377       | 462.1725         | 922.3537       | 461.6805         | 8  |
| 13 | 1466.6070 | 733.8072        | 1449.5805      | 725.2939         | 1448.5965      | 724.8019         | A    | 825.3373  | 413.1723        | 808.3108       | 404.6590         | 807.3268       | 404.1670         | 7  |
| 14 | 1581.6340 | 791.3206        | 1564.6074      | 782.8074         | 1563.6234      | 782.3153         | D    | 754.3002  | 377.6538        | 737.2737       | 369.1405         | 736.2897       | 368.6485         | 6  |
| 15 | 1710.6766 | 855.8419        | 1693.6500      | 847.3286         | 1692.6660      | 846.8366         | E    | 639.2733  | 320.1403        | 622.2467       | 311.6270         | 621.2627       | 311.1350         | 5  |
| 16 | 1825.7035 | 913.3554        | 1808.6770      | 904.8421         | 1807.6929      | 904.3501         | D    | 510.2307  | 255.6190        | 493.2041       | 247.1057         | 492.2201       | 246.6137         | 4  |
| 17 | 1988.7668 | 994.8871        | 1971.7403      | 986.3738         | 1970.7563      | 985.8818         | Y    | 395.2037  | 198.1055        | 378.1772       | 189.5922         |                |                  | 3  |
| 18 | 2045.7883 | 1023.3978       | 2028.7618      | 1014.8845        | 2027.7777      | 1014.3925        | G    | 232.1404  | 116.5738        | 215.1139       | 108.0606         |                |                  | 2  |
| 19 |           |                 |                |                  |                |                  | R    | 175.1190  | 88.0631         | 158.0924       | 79.5498          |                |                  | 1  |

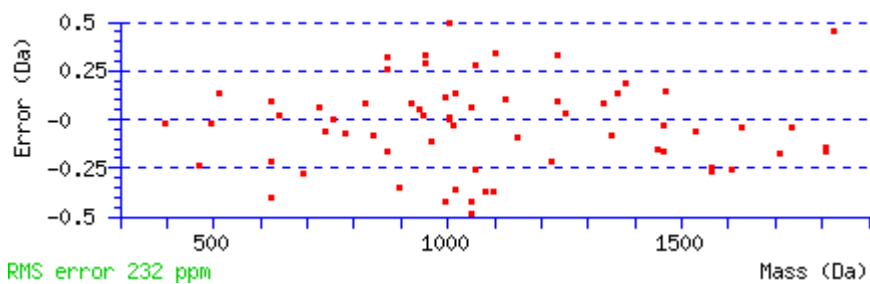

RMS error 232 ppm

Mass (Da)

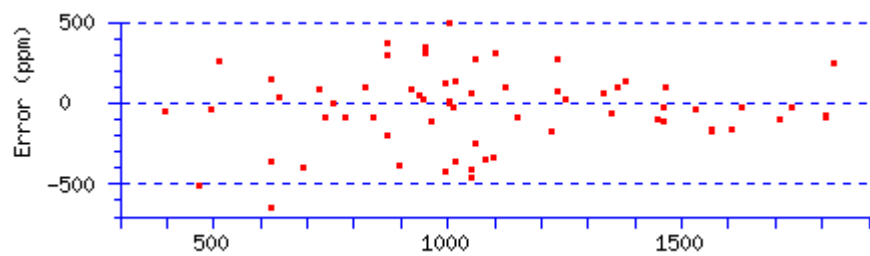

RMS error 232 ppm

Mass (Da)

IDENTIFICATION 16

MS/MS Fragmentation of **ATAPQTQHVSPMR**

Found in **IPI00118875**

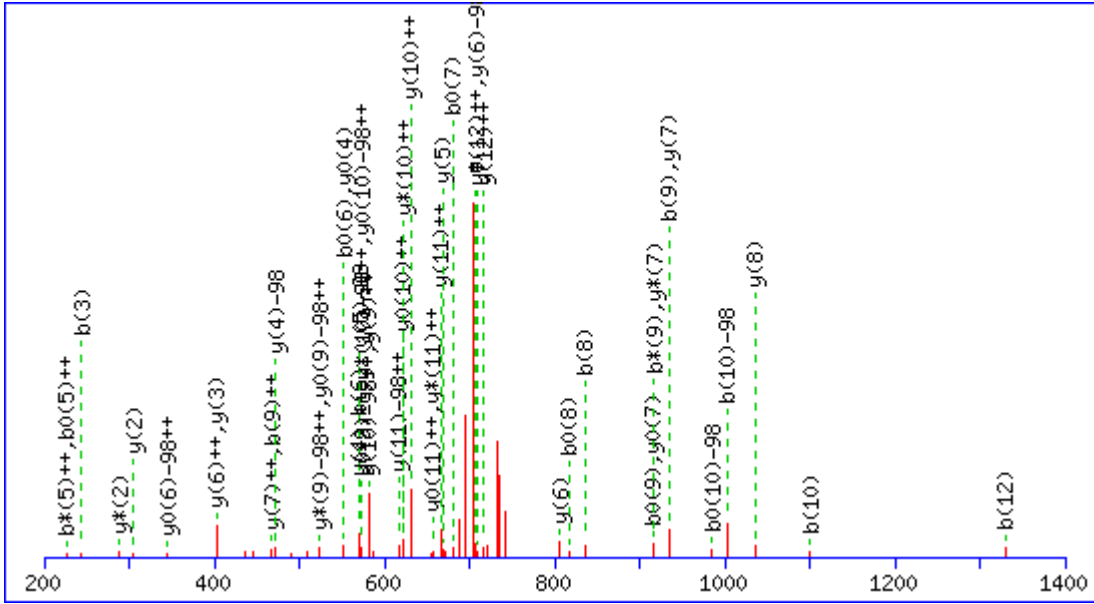

Monoisotopic mass of neutral peptide Mr(calc): 1502.6701

Fixed modifications: Carbamidomethyl (C) (apply to specified residues or termini only)

Variable modifications:

S10 : Phospho (ST), with neutral losses 0.0000(shown in table), 97.9769

Ions Score: 45 Expect: 0.0049 (help)

| #  | b         | b <sup>++</sup> | b <sup>*</sup> | b <sup>+++</sup> | b <sup>0</sup> | b <sup>0++</sup> | Seq. | y         | y <sup>++</sup> | y <sup>*</sup> | y <sup>+++</sup> | y <sup>0</sup> | y <sup>0++</sup> | #  |
|----|-----------|-----------------|----------------|------------------|----------------|------------------|------|-----------|-----------------|----------------|------------------|----------------|------------------|----|
| 1  | 72.0444   | 36.5258         |                |                  |                |                  | A    |           |                 |                |                  |                |                  | 13 |
| 2  | 173.0921  | 87.0497         |                |                  | 155.0815       | 78.0444          | T    | 1432.6403 | 716.8238        | 1415.6137      | 708.3105         | 1414.6297      | 707.8185         | 12 |
| 3  | 244.1292  | 122.5682        |                |                  | 226.1186       | 113.5629         | A    | 1331.5926 | 666.2999        | 1314.5661      | 657.7867         | 1313.5820      | 657.2947         | 11 |
| 4  | 341.1819  | 171.0946        |                |                  | 323.1714       | 162.0893         | P    | 1260.5555 | 630.7814        | 1243.5289      | 622.2681         | 1242.5449      | 621.7761         | 10 |
| 5  | 469.2405  | 235.1239        | 452.2140       | 226.6106         | 451.2300       | 226.1186         | Q    | 1163.5027 | 582.2550        | 1146.4762      | 573.7417         | 1145.4922      | 573.2497         | 9  |
| 6  | 570.2882  | 285.6477        | 553.2617       | 277.1345         | 552.2776       | 276.6425         | T    | 1035.4441 | 518.2257        | 1018.4176      | 509.7124         | 1017.4336      | 509.2204         | 8  |
| 7  | 698.3468  | 349.6770        | 681.3202       | 341.1638         | 680.3362       | 340.6717         | Q    | 934.3965  | 467.7019        | 917.3699       | 459.1886         | 916.3859       | 458.6966         | 7  |
| 8  | 835.4057  | 418.2065        | 818.3791       | 409.6932         | 817.3951       | 409.2012         | H    | 806.3379  | 403.6726        | 789.3113       | 395.1593         | 788.3273       | 394.6673         | 6  |
| 9  | 934.4741  | 467.7407        | 917.4476       | 459.2274         | 916.4635       | 458.7354         | V    | 669.2790  | 335.1431        | 652.2524       | 326.6299         | 651.2684       | 326.1378         | 5  |
| 10 | 1101.4725 | 551.2399        | 1084.4459      | 542.7266         | 1083.4619      | 542.2346         | S    | 570.2106  | 285.6089        | 553.1840       | 277.0956         | 552.2000       | 276.6036         | 4  |
| 11 | 1198.5252 | 599.7663        | 1181.4987      | 591.2530         | 1180.5147      | 590.7610         | P    | 403.2122  | 202.1097        | 386.1857       | 193.5965         |                |                  | 3  |
| 12 | 1329.5657 | 665.2865        | 1312.5392      | 656.7732         | 1311.5552      | 656.2812         | M    | 306.1594  | 153.5834        | 289.1329       | 145.0701         |                |                  | 2  |
| 13 |           |                 |                |                  |                |                  | R    | 175.1190  | 88.0631         | 158.0924       | 79.5498          |                |                  | 1  |

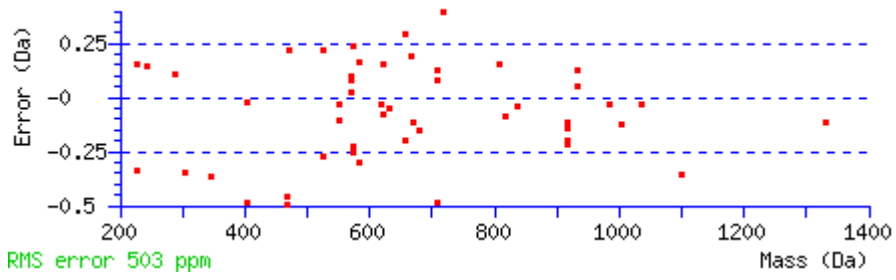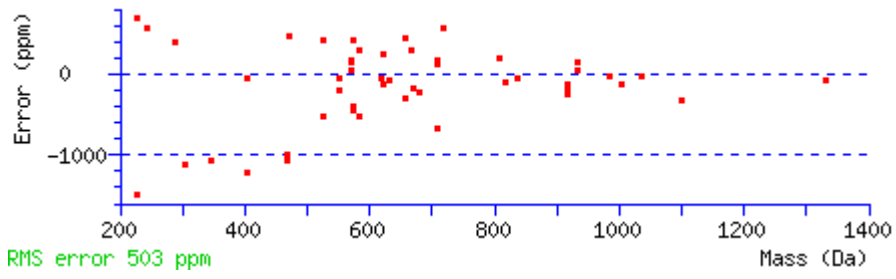



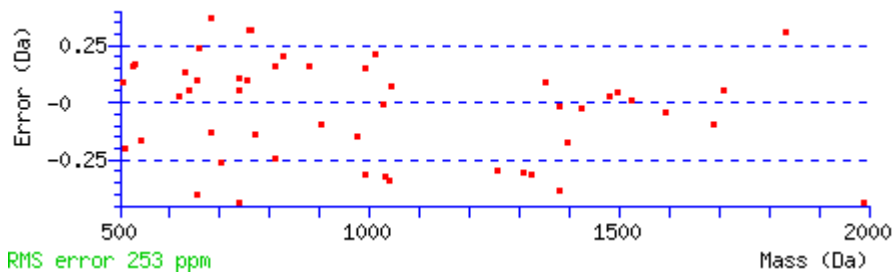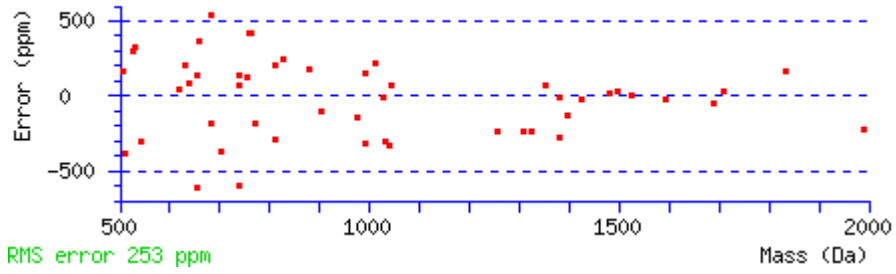

IDENTIFICATION 18

MS/MS Fragmentation of **ATAPQTQHVSPMR**

Found in **IPI00118875**

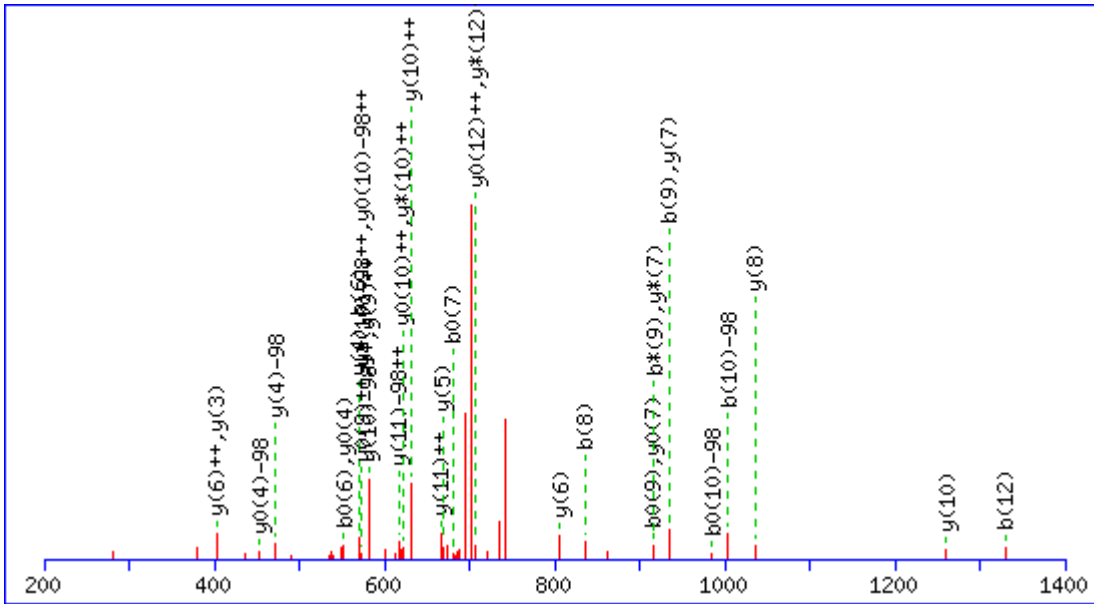

Monoisotopic mass of neutral peptide  $M_r(\text{calc})$ : 1502.6701

Fixed modifications: Carbamidomethyl (C) (apply to specified residues or termini only)

Variable modifications:

S10 : Phospho (ST), with neutral losses 0.0000 (shown in table), 97.9769

Ions Score: 39 Expect: 0.018 (help)

| #  | b         | b <sup>++</sup> | b <sup>*</sup> | b <sup>+++</sup> | b <sup>0</sup> | b <sup>0++</sup> | Seq. | y         | y <sup>++</sup> | y <sup>*</sup> | y <sup>+++</sup> | y <sup>0</sup> | y <sup>0++</sup> | #  |
|----|-----------|-----------------|----------------|------------------|----------------|------------------|------|-----------|-----------------|----------------|------------------|----------------|------------------|----|
| 1  | 72.0444   | 36.5258         |                |                  |                |                  | A    |           |                 |                |                  |                |                  | 13 |
| 2  | 173.0921  | 87.0497         |                |                  | 155.0815       | 78.0444          | T    | 1432.6403 | 716.8238        | 1415.6137      | 708.3105         | 1414.6297      | 707.8185         | 12 |
| 3  | 244.1292  | 122.5682        |                |                  | 226.1186       | 113.5629         | A    | 1331.5926 | 666.2999        | 1314.5661      | 657.7867         | 1313.5820      | 657.2947         | 11 |
| 4  | 341.1819  | 171.0946        |                |                  | 323.1714       | 162.0893         | P    | 1260.5555 | 630.7814        | 1243.5289      | 622.2681         | 1242.5449      | 621.7761         | 10 |
| 5  | 469.2405  | 235.1239        | 452.2140       | 226.6106         | 451.2300       | 226.1186         | Q    | 1163.5027 | 582.2550        | 1146.4762      | 573.7417         | 1145.4922      | 573.2497         | 9  |
| 6  | 570.2882  | 285.6477        | 553.2617       | 277.1345         | 552.2776       | 276.6425         | T    | 1035.4441 | 518.2257        | 1018.4176      | 509.7124         | 1017.4336      | 509.2204         | 8  |
| 7  | 698.3468  | 349.6770        | 681.3202       | 341.1638         | 680.3362       | 340.6717         | Q    | 934.3965  | 467.7019        | 917.3699       | 459.1886         | 916.3859       | 458.6966         | 7  |
| 8  | 835.4057  | 418.2065        | 818.3791       | 409.6932         | 817.3951       | 409.2012         | H    | 806.3379  | 403.6726        | 789.3113       | 395.1593         | 788.3273       | 394.6673         | 6  |
| 9  | 934.4741  | 467.7407        | 917.4476       | 459.2274         | 916.4635       | 458.7354         | V    | 669.2790  | 335.1431        | 652.2524       | 326.6299         | 651.2684       | 326.1378         | 5  |
| 10 | 1101.4725 | 551.2399        | 1084.4459      | 542.7266         | 1083.4619      | 542.2346         | S    | 570.2106  | 285.6089        | 553.1840       | 277.0956         | 552.2000       | 276.6036         | 4  |
| 11 | 1198.5252 | 599.7663        | 1181.4987      | 591.2530         | 1180.5147      | 590.7610         | P    | 403.2122  | 202.1097        | 386.1857       | 193.5965         |                |                  | 3  |
| 12 | 1329.5657 | 665.2865        | 1312.5392      | 656.7732         | 1311.5552      | 656.2812         | M    | 306.1594  | 153.5834        | 289.1329       | 145.0701         |                |                  | 2  |
| 13 |           |                 |                |                  |                |                  | R    | 175.1190  | 88.0631         | 158.0924       | 79.5498          |                |                  | 1  |



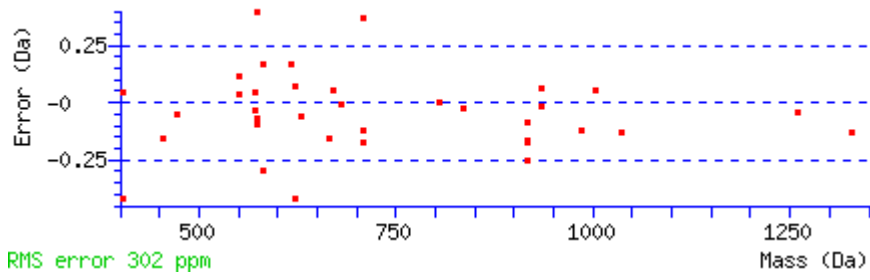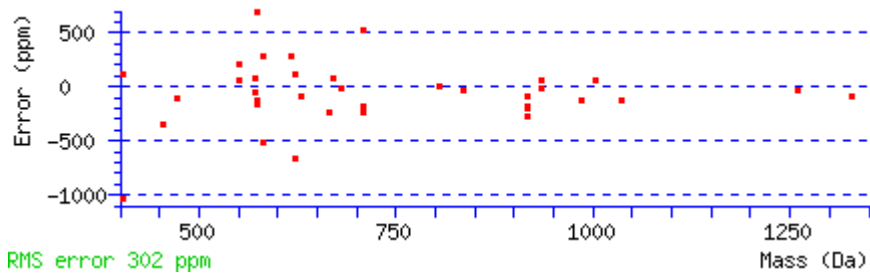

IDENTIFICATION 19

MS/MS Fragmentation of **SSTPLPTVSSAENTR**

Found in **IPI00126338**

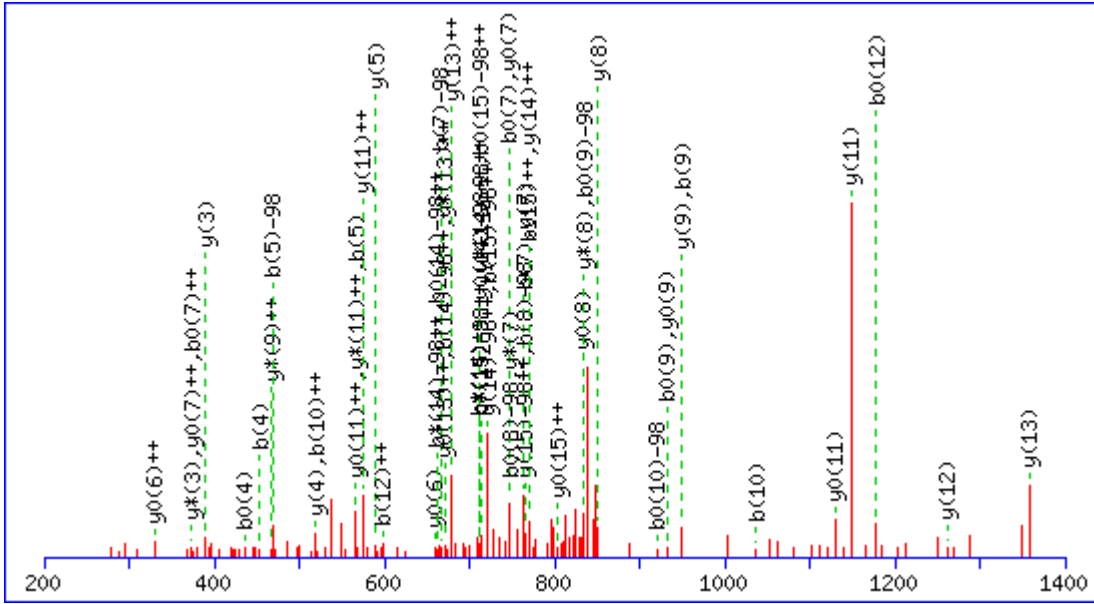

Monoisotopic mass of neutral peptide  $M_r(\text{calc})$ : 1712.7618

Fixed modifications: Carbamidomethyl (C) (apply to specified residues or termini only)

Variable modifications:

T3 : Phospho (ST), with neutral losses 0.0000 (shown in table), 97.9769

Ions Score: 35 Expect: 0.05 (help)

| #  | b         | b <sup>++</sup> | b <sup>*</sup> | b <sup>+++</sup> | b <sup>0</sup> | b <sup>0++</sup> | Seq. | y         | y <sup>++</sup> | y <sup>*</sup> | y <sup>+++</sup> | y <sup>0</sup> | y <sup>0++</sup> | #  |
|----|-----------|-----------------|----------------|------------------|----------------|------------------|------|-----------|-----------------|----------------|------------------|----------------|------------------|----|
| 1  | 88.0393   | 44.5233         |                |                  | 70.0287        | 35.5180          | S    |           |                 |                |                  |                |                  | 16 |
| 2  | 175.0713  | 88.0393         |                |                  | 157.0608       | 79.0340          | S    | 1626.7371 | 813.8722        | 1609.7105      | 805.3589         | 1608.7265      | 804.8669         | 15 |
| 3  | 356.0853  | 178.5463        |                |                  | 338.0748       | 169.5410         | T    | 1539.7050 | 770.3562        | 1522.6785      | 761.8429         | 1521.6945      | 761.3509         | 14 |
| 4  | 453.1381  | 227.0727        |                |                  | 435.1275       | 218.0674         | P    | 1358.6910 | 679.8492        | 1341.6645      | 671.3359         | 1340.6805      | 670.8439         | 13 |
| 5  | 566.2222  | 283.6147        |                |                  | 548.2116       | 274.6094         | L    | 1261.6383 | 631.3228        | 1244.6117      | 622.8095         | 1243.6277      | 622.3175         | 12 |
| 6  | 663.2749  | 332.1411        |                |                  | 645.2644       | 323.1358         | P    | 1148.5542 | 574.7807        | 1131.5277      | 566.2675         | 1130.5436      | 565.7755         | 11 |
| 7  | 764.3226  | 382.6649        |                |                  | 746.3120       | 373.6597         | T    | 1051.5014 | 526.2544        | 1034.4749      | 517.7411         | 1033.4909      | 517.2491         | 10 |
| 8  | 863.3910  | 432.1992        |                |                  | 845.3805       | 423.1939         | V    | 950.4538  | 475.7305        | 933.4272       | 467.2172         | 932.4432       | 466.7252         | 9  |
| 9  | 950.4231  | 475.7152        |                |                  | 932.4125       | 466.7099         | S    | 851.3853  | 426.1963        | 834.3588       | 417.6830         | 833.3748       | 417.1910         | 8  |
| 10 | 1037.4551 | 519.2312        |                |                  | 1019.4445      | 510.2259         | S    | 764.3533  | 382.6803        | 747.3268       | 374.1670         | 746.3428       | 373.6750         | 7  |
| 11 | 1124.4871 | 562.7472        |                |                  | 1106.4765      | 553.7419         | S    | 677.3213  | 339.1643        | 660.2947       | 330.6510         | 659.3107       | 330.1590         | 6  |
| 12 | 1195.5242 | 598.2658        |                |                  | 1177.5137      | 589.2605         | A    | 590.2893  | 295.6483        | 573.2627       | 287.1350         | 572.2787       | 286.6430         | 5  |
| 13 | 1324.5668 | 662.7870        |                |                  | 1306.5563      | 653.7818         | E    | 519.2522  | 260.1297        | 502.2256       | 251.6164         | 501.2416       | 251.1244         | 4  |
| 14 | 1438.6097 | 719.8085        | 1421.5832      | 711.2952         | 1420.5992      | 710.8032         | N    | 390.2096  | 195.6084        | 373.1830       | 187.0951         | 372.1990       | 186.6031         | 3  |
| 15 | 1539.6574 | 770.3324        | 1522.6309      | 761.8191         | 1521.6469      | 761.3271         | T    | 276.1666  | 138.5870        | 259.1401       | 130.0737         | 258.1561       | 129.5817         | 2  |
| 16 |           |                 |                |                  |                |                  | R    | 175.1190  | 88.0631         | 158.0924       | 79.5498          |                |                  | 1  |

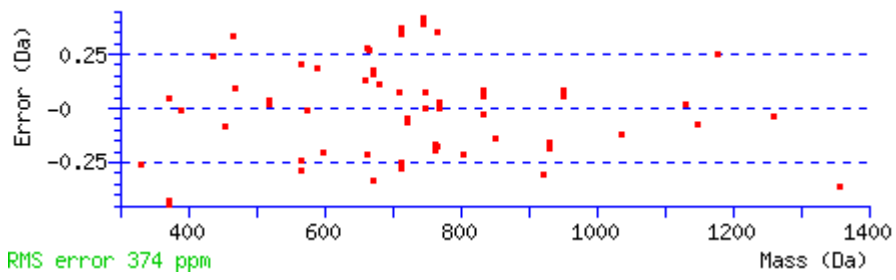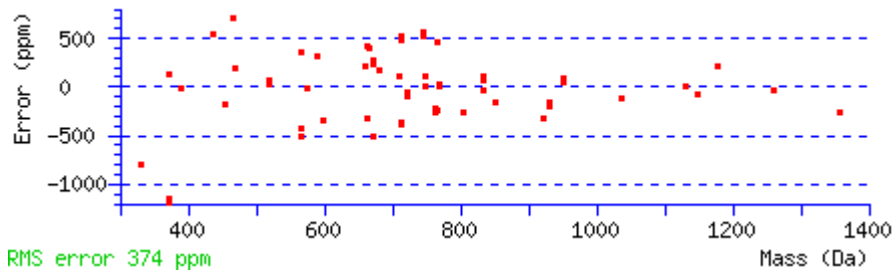

IDENTIFICATION 20

MS/MS Fragmentation of **EGKEDEASTDVDEKPK**

Found in **IPI00137194**

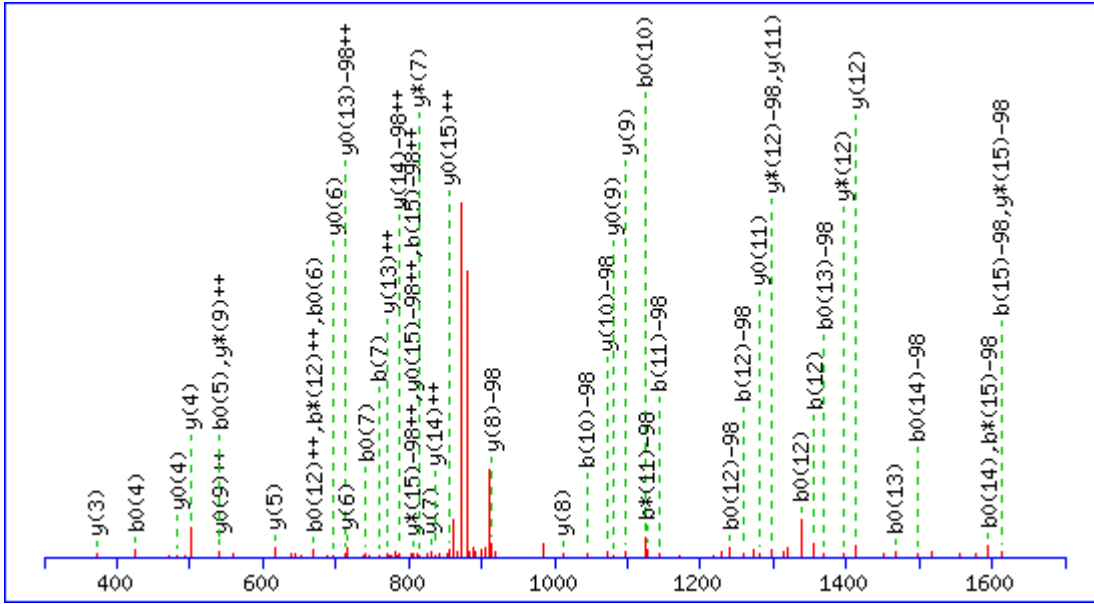

Monoisotopic mass of neutral peptide Mr(calc): 1855.7724

Fixed modifications: Carbamidomethyl (C) (apply to specified residues or termini only)

Variable modifications:

T9 : Phospho (ST), with neutral losses 97.9769 (shown in table), 0.0000

Ions Score: 29 Expect: 0.23 (help)

| #  | b         | b <sup>++</sup> | b <sup>*</sup> | b <sup>+++</sup> | b <sup>0</sup> | b <sup>0++</sup> | Seq. | y         | y <sup>++</sup> | y <sup>*</sup> | y <sup>+++</sup> | y <sup>0</sup> | y <sup>0++</sup> | #  |
|----|-----------|-----------------|----------------|------------------|----------------|------------------|------|-----------|-----------------|----------------|------------------|----------------|------------------|----|
| 1  | 130.0499  | 65.5286         |                |                  | 112.0393       | 56.5233          | E    |           |                 |                |                  |                |                  | 16 |
| 2  | 187.0713  | 94.0393         |                |                  | 169.0608       | 85.0340          | G    | 1629.7602 | 815.3838        | 1612.7337      | 806.8705         | 1611.7497      | 806.3785         | 15 |
| 3  | 315.1663  | 158.0868        | 298.1397       | 149.5735         | 297.1557       | 149.0815         | K    | 1572.7388 | 786.8730        | 1555.7122      | 778.3597         | 1554.7282      | 777.8677         | 14 |
| 4  | 444.2089  | 222.6081        | 427.1823       | 214.0948         | 426.1983       | 213.6028         | E    | 1444.6438 | 722.8255        | 1427.6173      | 714.3123         | 1426.6332      | 713.8203         | 13 |
| 5  | 559.2358  | 280.1216        | 542.2093       | 271.6083         | 541.2253       | 271.1163         | D    | 1315.6012 | 658.3042        | 1298.5747      | 649.7910         | 1297.5907      | 649.2990         | 12 |
| 6  | 688.2784  | 344.6429        | 671.2519       | 336.1296         | 670.2679       | 335.6376         | E    | 1200.5743 | 600.7908        | 1183.5477      | 592.2775         | 1182.5637      | 591.7855         | 11 |
| 7  | 759.3155  | 380.1614        | 742.2890       | 371.6481         | 741.3050       | 371.1561         | A    | 1071.5317 | 536.2695        | 1054.5051      | 527.7562         | 1053.5211      | 527.2642         | 10 |
| 8  | 846.3476  | 423.6774        | 829.3210       | 415.1641         | 828.3370       | 414.6721         | S    | 1000.4946 | 500.7509        | 983.4680       | 492.2376         | 982.4840       | 491.7456         | 9  |
| 9  | 929.3847  | 465.1960        | 912.3581       | 456.6827         | 911.3741       | 456.1907         | T    | 913.4625  | 457.2349        | 896.4360       | 448.7216         | 895.4520       | 448.2296         | 8  |
| 10 | 1044.4116 | 522.7095        | 1027.3851      | 514.1962         | 1026.4011      | 513.7042         | D    | 830.4254  | 415.7164        | 813.3989       | 407.2031         | 812.4149       | 406.7111         | 7  |
| 11 | 1143.4800 | 572.2437        | 1126.4535      | 563.7304         | 1125.4695      | 563.2384         | V    | 715.3985  | 358.2029        | 698.3719       | 349.6896         | 697.3879       | 349.1976         | 6  |
| 12 | 1258.5070 | 629.7571        | 1241.4804      | 621.2439         | 1240.4964      | 620.7518         | D    | 616.3301  | 308.6687        | 599.3035       | 300.1554         | 598.3195       | 299.6634         | 5  |
| 13 | 1387.5496 | 694.2784        | 1370.5230      | 685.7652         | 1369.5390      | 685.2731         | E    | 501.3031  | 251.1552        | 484.2766       | 242.6419         | 483.2926       | 242.1499         | 4  |
| 14 | 1515.6445 | 758.3259        | 1498.6180      | 749.8126         | 1497.6340      | 749.3206         | K    | 372.2605  | 186.6339        | 355.2340       | 178.1206         |                |                  | 3  |
| 15 | 1612.6973 | 806.8523        | 1595.6708      | 798.3390         | 1594.6867      | 797.8470         | P    | 244.1656  | 122.5864        | 227.1390       | 114.0731         |                |                  | 2  |
| 16 |           |                 |                |                  |                |                  | K    | 147.1128  | 74.0600         | 130.0863       | 65.5468          |                |                  | 1  |

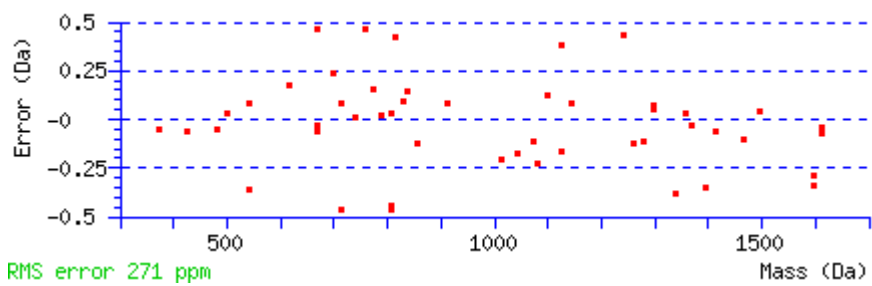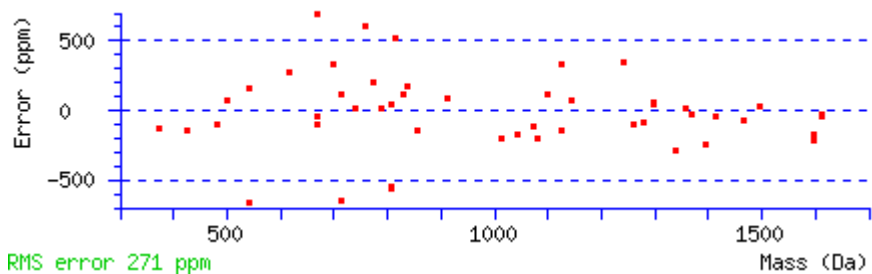

IDENTIFICATION 21

MS/MS Fragmentation of **QKSDAEEDGVTGSQDEEDSKPK**

Found in **IPI00119618**

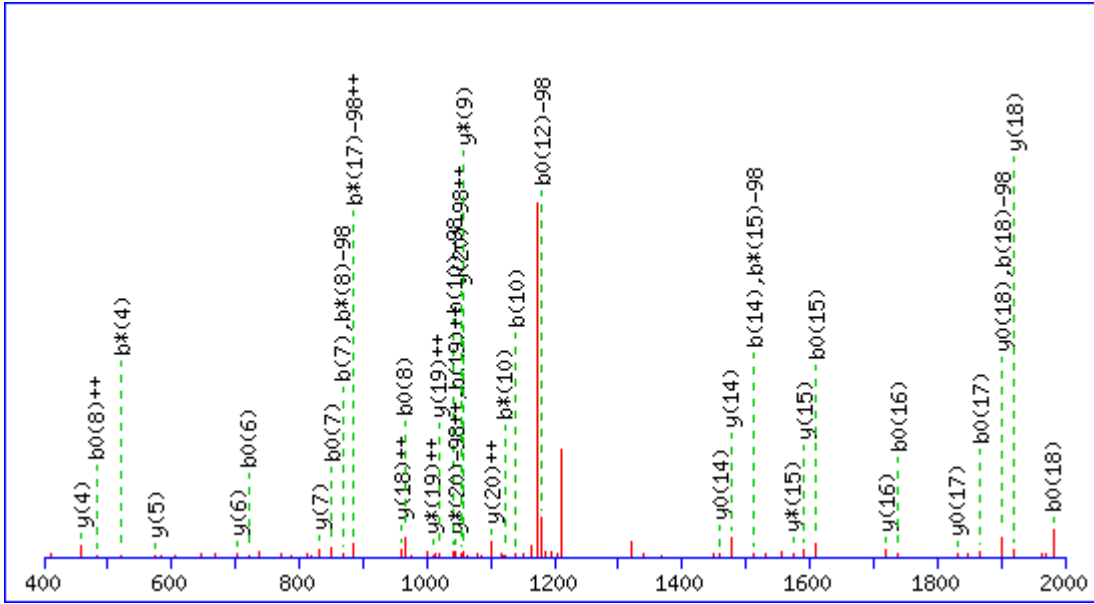

Monoisotopic mass of neutral peptide Mr(calc): 2458.0020

Fixed modifications: Carbamidomethyl (C) (apply to specified residues or termini only)

Variable modifications:

S3 : Phospho (ST), with neutral losses 97.9769 (shown in table), 0.0000

Ions Score: 30 Expect: 0.21 (help)

| #  | b         | b <sup>++</sup> | b <sup>*</sup> | b <sup>+++</sup> | b <sup>0</sup> | b <sup>0++</sup> | Seq. | y         | y <sup>++</sup> | y <sup>*</sup> | y <sup>+++</sup> | y <sup>0</sup> | y <sup>0++</sup> | #  |
|----|-----------|-----------------|----------------|------------------|----------------|------------------|------|-----------|-----------------|----------------|------------------|----------------|------------------|----|
| 1  | 129.0659  | 65.0366         | 112.0393       | 56.5233          |                |                  | Q    |           |                 |                |                  |                |                  | 22 |
| 2  | 257.1608  | 129.0840        | 240.1343       | 120.5708         |                |                  | K    | 2232.9739 | 1116.9906       | 2215.9473      | 1108.4773        | 2214.9633      | 1107.9853        | 21 |
| 3  | 326.1823  | 163.5948        | 309.1557       | 155.0815         | 308.1717       | 154.5895         | S    | 2104.8789 | 1052.9431       | 2087.8524      | 1044.4298        | 2086.8683      | 1043.9378        | 20 |
| 4  | 441.2092  | 221.1082        | 424.1827       | 212.5950         | 423.1987       | 212.1030         | D    | 2035.8574 | 1018.4324       | 2018.8309      | 1009.9191        | 2017.8469      | 1009.4271        | 19 |
| 5  | 512.2463  | 256.6268        | 495.2198       | 248.1135         | 494.2358       | 247.6215         | A    | 1920.8305 | 960.9189        | 1903.8040      | 952.4056         | 1902.8199      | 951.9136         | 18 |
| 6  | 641.2889  | 321.1481        | 624.2624       | 312.6348         | 623.2784       | 312.1428         | E    | 1849.7934 | 925.4003        | 1832.7668      | 916.8871         | 1831.7828      | 916.3950         | 17 |
| 7  | 770.3315  | 385.6694        | 753.3050       | 377.1561         | 752.3210       | 376.6641         | E    | 1720.7508 | 860.8790        | 1703.7242      | 852.3658         | 1702.7402      | 851.8738         | 16 |
| 8  | 885.3585  | 443.1829        | 868.3319       | 434.6696         | 867.3479       | 434.1776         | D    | 1591.7082 | 796.3577        | 1574.6817      | 787.8445         | 1573.6976      | 787.3525         | 15 |
| 9  | 942.3799  | 471.6936        | 925.3534       | 463.1803         | 924.3694       | 462.6883         | G    | 1476.6813 | 738.8443        | 1459.6547      | 730.3310         | 1458.6707      | 729.8390         | 14 |
| 10 | 1041.4483 | 521.2278        | 1024.4218      | 512.7145         | 1023.4378      | 512.2225         | V    | 1419.6598 | 710.3335        | 1402.6332      | 701.8203         | 1401.6492      | 701.3283         | 13 |
| 11 | 1142.4960 | 571.7516        | 1125.4695      | 563.2384         | 1124.4855      | 562.7464         | T    | 1320.5914 | 660.7993        | 1303.5648      | 652.2861         | 1302.5808      | 651.7940         | 12 |
| 12 | 1199.5175 | 600.2624        | 1182.4909      | 591.7491         | 1181.5069      | 591.2571         | G    | 1219.5437 | 610.2755        | 1202.5172      | 601.7622         | 1201.5331      | 601.2702         | 11 |
| 13 | 1286.5495 | 643.7784        | 1269.5230      | 635.2651         | 1268.5390      | 634.7731         | S    | 1162.5222 | 581.7648        | 1145.4957      | 573.2515         | 1144.5117      | 572.7595         | 10 |
| 14 | 1414.6081 | 707.8077        | 1397.5815      | 699.2944         | 1396.5975      | 698.8024         | Q    | 1075.4902 | 538.2487        | 1058.4637      | 529.7355         | 1057.4796      | 529.2435         | 9  |
| 15 | 1529.6350 | 765.3212        | 1512.6085      | 756.8079         | 1511.6245      | 756.3159         | D    | 947.4316  | 474.2195        | 930.4051       | 465.7062         | 929.4211       | 465.2142         | 8  |
| 16 | 1658.6776 | 829.8425        | 1641.6511      | 821.3292         | 1640.6671      | 820.8372         | E    | 832.4047  | 416.7060        | 815.3781       | 408.1927         | 814.3941       | 407.7007         | 7  |
| 17 | 1787.7202 | 894.3637        | 1770.6937      | 885.8505         | 1769.7097      | 885.3585         | E    | 703.3621  | 352.1847        | 686.3355       | 343.6714         | 685.3515       | 343.1794         | 6  |
| 18 | 1902.7472 | 951.8772        | 1885.7206      | 943.3639         | 1884.7366      | 942.8719         | D    | 574.3195  | 287.6634        | 557.2930       | 279.1501         | 556.3089       | 278.6581         | 5  |
| 19 | 1989.7792 | 995.3932        | 1972.7526      | 986.8800         | 1971.7686      | 986.3880         | S    | 459.2926  | 230.1499        | 442.2660       | 221.6366         | 441.2820       | 221.1446         | 4  |
| 20 | 2117.8742 | 1059.4407       | 2100.8476      | 1050.9274        | 2099.8636      | 1050.4354        | K    | 372.2605  | 186.6339        | 355.2340       | 178.1206         |                |                  | 3  |
| 21 | 2214.9269 | 1107.9671       | 2197.9004      | 1099.4538        | 2196.9164      | 1098.9618        | P    | 244.1656  | 122.5864        | 227.1390       | 114.0731         |                |                  | 2  |
| 22 |           |                 |                |                  |                |                  | K    | 147.1128  | 74.0600         | 130.0863       | 65.5468          |                |                  | 1  |

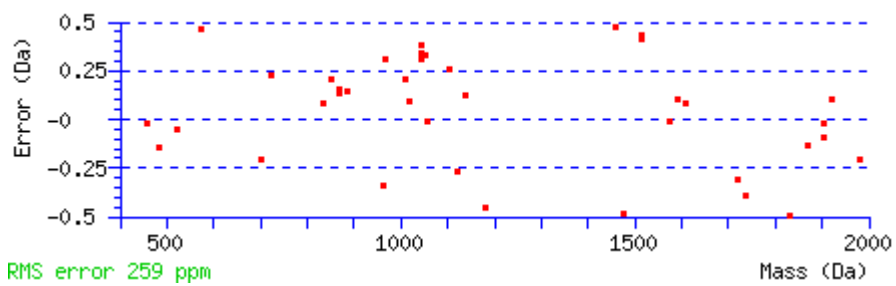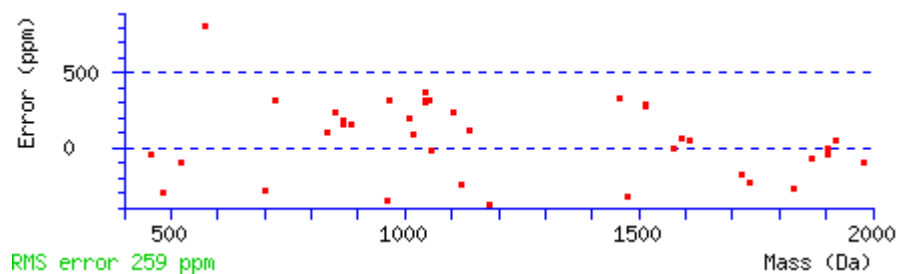

IDENTIFICATION 22

MS/MS Fragmentation of ELSPEQSTAGKPSDGSSALDR

Found in IPI0022461

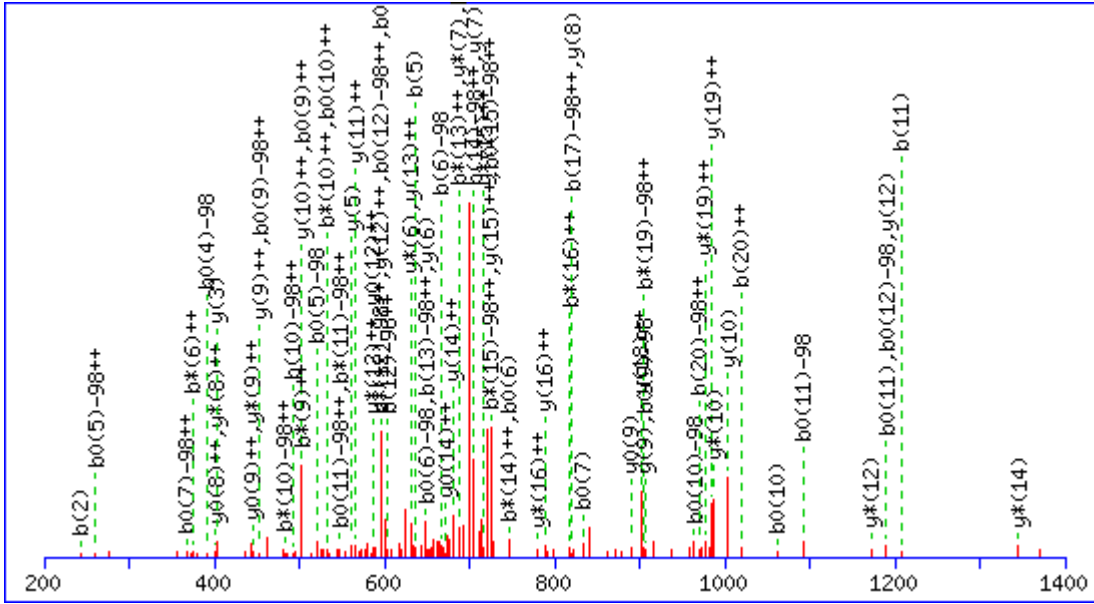

Monoisotopic mass of neutral peptide Mr(calc): 2210.9692

Fixed modifications: Carbamidomethyl (C) (apply to specified residues or termini only)

Variable modifications:

S3 : Phospho (ST), with neutral losses 0.0000(shown in table), 97.9769

Ions Score: 39 Expect: 0.024 (help)

| #  | b         | b <sup>++</sup> | b <sup>*</sup> | b <sup>+++</sup> | b <sup>0</sup> | b <sup>0++</sup> | Seq. | y         | y <sup>++</sup> | y <sup>*</sup> | y <sup>+++</sup> | y <sup>0</sup> | y <sup>0++</sup> | #  |
|----|-----------|-----------------|----------------|------------------|----------------|------------------|------|-----------|-----------------|----------------|------------------|----------------|------------------|----|
| 1  | 130.0499  | 65.5286         |                |                  | 112.0393       | 56.5233          | E    |           |                 |                |                  |                |                  | 21 |
| 2  | 243.1339  | 122.0706        |                |                  | 225.1234       | 113.0653         | L    | 2082.9339 | 1041.9706       | 2065.9074      | 1033.4573        | 2064.9234      | 1032.9653        | 20 |
| 3  | 410.1323  | 205.5698        |                |                  | 392.1217       | 196.5645         | S    | 1969.8499 | 985.4286        | 1952.8233      | 976.9153         | 1951.8393      | 976.4233         | 19 |
| 4  | 507.1851  | 254.0962        |                |                  | 489.1745       | 245.0909         | P    | 1802.8515 | 901.9294        | 1785.8250      | 893.4161         | 1784.8409      | 892.9241         | 18 |
| 5  | 636.2276  | 318.6175        |                |                  | 618.2171       | 309.6122         | E    | 1705.7987 | 853.4030        | 1688.7722      | 844.8897         | 1687.7882      | 844.3977         | 17 |
| 6  | 764.2862  | 382.6468        | 747.2597       | 374.1335         | 746.2757       | 373.6415         | Q    | 1576.7562 | 788.8817        | 1559.7296      | 780.3684         | 1558.7456      | 779.8764         | 16 |
| 7  | 851.3183  | 426.1628        | 834.2917       | 417.6495         | 833.3077       | 417.1575         | S    | 1448.6976 | 724.8524        | 1431.6710      | 716.3392         | 1430.6870      | 715.8471         | 15 |
| 8  | 952.3659  | 476.6866        | 935.3394       | 468.1733         | 934.3554       | 467.6813         | T    | 1361.6655 | 681.3364        | 1344.6390      | 672.8231         | 1343.6550      | 672.3311         | 14 |
| 9  | 1023.4030 | 512.2052        | 1006.3765      | 503.6919         | 1005.3925      | 503.1999         | A    | 1260.6179 | 630.8126        | 1243.5913      | 622.2993         | 1242.6073      | 621.8073         | 13 |
| 10 | 1080.4245 | 540.7159        | 1063.3980      | 532.2026         | 1062.4139      | 531.7106         | G    | 1189.5808 | 595.2940        | 1172.5542      | 586.7807         | 1171.5702      | 586.2887         | 12 |
| 11 | 1208.5195 | 604.7634        | 1191.4929      | 596.2501         | 1190.5089      | 595.7581         | K    | 1132.5593 | 566.7833        | 1115.5327      | 558.2700         | 1114.5487      | 557.7780         | 11 |
| 12 | 1305.5722 | 653.2898        | 1288.5457      | 644.7765         | 1287.5617      | 644.2845         | P    | 1004.4643 | 502.7358        | 987.4378       | 494.2225         | 986.4538       | 493.7305         | 10 |
| 13 | 1392.6043 | 696.8058        | 1375.5777      | 688.2925         | 1374.5937      | 687.8005         | S    | 907.4116  | 454.2094        | 890.3850       | 445.6961         | 889.4010       | 445.2041         | 9  |
| 14 | 1507.6312 | 754.3192        | 1490.6047      | 745.8060         | 1489.6206      | 745.3140         | D    | 820.3795  | 410.6934        | 803.3530       | 402.1801         | 802.3690       | 401.6881         | 8  |
| 15 | 1564.6527 | 782.8300        | 1547.6261      | 774.3167         | 1546.6421      | 773.8247         | G    | 705.3526  | 353.1799        | 688.3260       | 344.6667         | 687.3420       | 344.1747         | 7  |
| 16 | 1651.6847 | 826.3460        | 1634.6582      | 817.8327         | 1633.6741      | 817.3407         | S    | 648.3311  | 324.6692        | 631.3046       | 316.1559         | 630.3206       | 315.6639         | 6  |
| 17 | 1738.7167 | 869.8620        | 1721.6902      | 861.3487         | 1720.7062      | 860.8567         | S    | 561.2991  | 281.1532        | 544.2726       | 272.6399         | 543.2885       | 272.1479         | 5  |
| 18 | 1809.7538 | 905.3806        | 1792.7273      | 896.8673         | 1791.7433      | 896.3753         | A    | 474.2671  | 237.6372        | 457.2405       | 229.1239         | 456.2565       | 228.6319         | 4  |
| 19 | 1922.8379 | 961.9226        | 1905.8114      | 953.4093         | 1904.8273      | 952.9173         | L    | 403.2300  | 202.1186        | 386.2034       | 193.6053         | 385.2194       | 193.1133         | 3  |
| 20 | 2037.8649 | 1019.4361       | 2020.8383      | 1010.9228        | 2019.8543      | 1010.4308        | D    | 290.1459  | 145.5766        | 273.1193       | 137.0633         | 272.1353       | 136.5713         | 2  |
| 21 |           |                 |                |                  |                |                  | R    | 175.1190  | 88.0631         | 158.0924       | 79.5498          |                |                  | 1  |



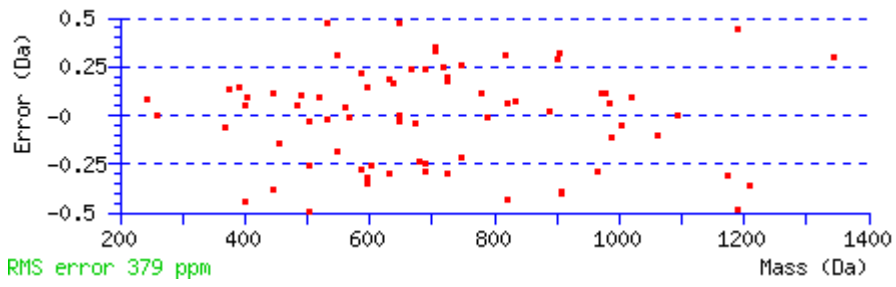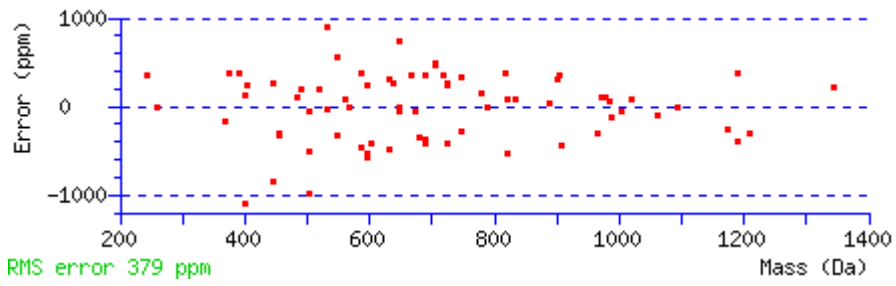

IDENTIFICATION 23

MS/MS Fragmentation of **IPTLEEGLQLPSPTATSQLPLESDAVECLNYQHYK**

Found in **IPI00223253**

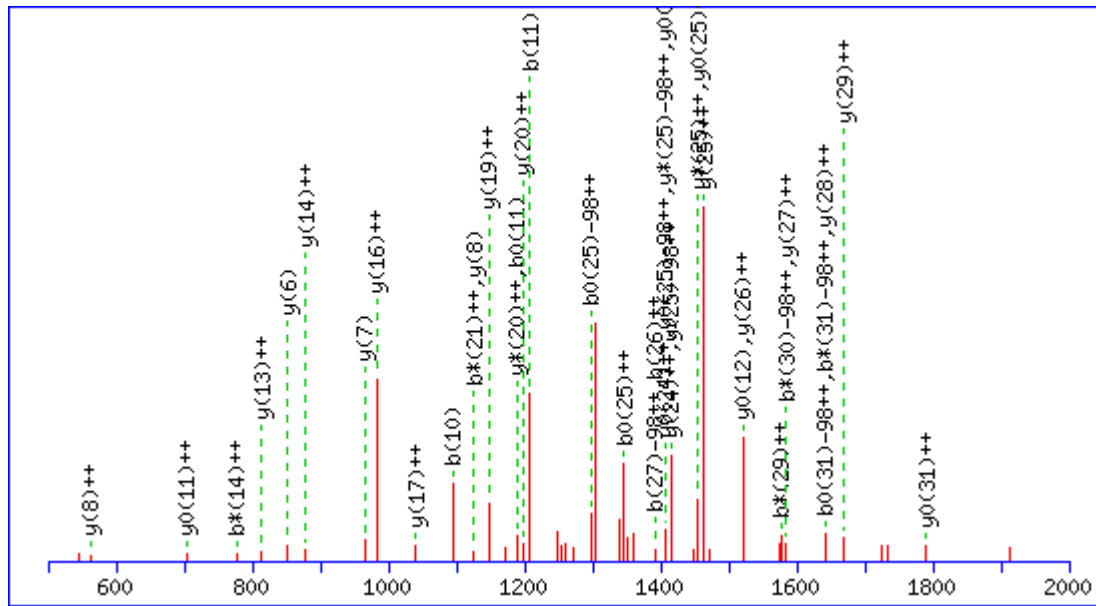

Monoisotopic mass of neutral peptide Mr(calc): 4133.9908

Fixed modifications: Carbamidomethyl (C) (apply to specified residues or termini only)

Variable modifications:

S13 : Phospho (ST), with neutral losses 0.0000(shown in table), 97.9769

Ions Score: 82 Expect: 1e-06 (help)

| #  | b         | b <sup>++</sup> | b <sup>*</sup> | b <sup>+++</sup> | b <sup>0</sup> | b <sup>0++</sup> | Seq. | y         | y <sup>++</sup> | y <sup>*</sup> | y <sup>+++</sup> | y <sup>0</sup> | y <sup>0++</sup> | #  |
|----|-----------|-----------------|----------------|------------------|----------------|------------------|------|-----------|-----------------|----------------|------------------|----------------|------------------|----|
| 1  | 114.0913  | 57.5493         |                |                  |                |                  | I    |           |                 |                |                  |                |                  | 36 |
| 2  | 227.1754  | 114.0913        |                |                  |                |                  | I    | 4021.9141 | 2011.4607       | 4004.8875      | 2002.9474        | 4003.9035      | 2002.4554        | 35 |
| 3  | 324.2282  | 162.6177        |                |                  |                |                  | P    | 3908.8300 | 1954.9186       | 3891.8034      | 1946.4054        | 3890.8194      | 1945.9134        | 34 |
| 4  | 425.2758  | 213.1416        |                |                  | 407.2653       | 204.1363         | T    | 3811.7772 | 1906.3923       | 3794.7507      | 1897.8790        | 3793.7667      | 1897.3870        | 33 |
| 5  | 538.3599  | 269.6836        |                |                  | 520.3493       | 260.6783         | L    | 3710.7296 | 1855.8684       | 3693.7030      | 1847.3551        | 3692.7190      | 1846.8631        | 32 |
| 6  | 667.4025  | 334.2049        |                |                  | 649.3919       | 325.1996         | E    | 3597.6455 | 1799.3264       | 3580.6189      | 1790.8131        | 3579.6349      | 1790.3211        | 31 |
| 7  | 796.4451  | 398.7262        |                |                  | 778.4345       | 389.7209         | E    | 3468.6029 | 1734.8051       | 3451.5763      | 1726.2918        | 3450.5923      | 1725.7998        | 30 |
| 8  | 853.4666  | 427.2369        |                |                  | 835.4560       | 418.2316         | G    | 3339.5603 | 1670.2838       | 3322.5338      | 1661.7705        | 3321.5497      | 1661.2785        | 29 |
| 9  | 966.5506  | 483.7790        |                |                  | 948.5401       | 474.7737         | L    | 3282.5388 | 1641.7731       | 3265.5123      | 1633.2598        | 3264.5283      | 1632.7678        | 28 |
| 10 | 1094.6092 | 547.8082        | 1077.5827      | 539.2950         | 1076.5986      | 538.8030         | Q    | 3169.4548 | 1585.2310       | 3152.4282      | 1576.7178        | 3151.4442      | 1576.2257        | 27 |
| 11 | 1207.6933 | 604.3503        | 1190.6667      | 595.8370         | 1189.6827      | 595.3450         | L    | 3041.3962 | 1521.2017       | 3024.3696      | 1512.6885        | 3023.3856      | 1512.1965        | 26 |
| 12 | 1304.7460 | 652.8767        | 1287.7195      | 644.3634         | 1286.7355      | 643.8714         | P    | 2928.3121 | 1464.6597       | 2911.2856      | 1456.1464        | 2910.3016      | 1455.6544        | 25 |
| 13 | 1471.7444 | 736.3758        | 1454.7178      | 727.8626         | 1453.7338      | 727.3706         | S    | 2831.2594 | 1416.1333       | 2814.2328      | 1407.6200        | 2813.2488      | 1407.1280        | 24 |
| 14 | 1568.7972 | 784.9022        | 1551.7706      | 776.3889         | 1550.7866      | 775.8969         | P    | 2664.2610 | 1332.6341       | 2647.2345      | 1324.1209        | 2646.2504      | 1323.6289        | 23 |
| 15 | 1669.8448 | 835.4261        | 1652.8183      | 826.9128         | 1651.8343      | 826.4208         | T    | 2567.2082 | 1284.1078       | 2550.1817      | 1275.5945        | 2549.1977      | 1275.1025        | 22 |
| 16 | 1740.8819 | 870.9446        | 1723.8554      | 862.4313         | 1722.8714      | 861.9393         | A    | 2466.1606 | 1233.5839       | 2449.1340      | 1225.0706        | 2448.1500      | 1224.5786        | 21 |
| 17 | 1841.9296 | 921.4685        | 1824.9031      | 912.9552         | 1823.9191      | 912.4632         | T    | 2395.1235 | 1198.0654       | 2378.0969      | 1189.5521        | 2377.1129      | 1189.0601        | 20 |
| 18 | 1928.9617 | 964.9845        | 1911.9351      | 956.4712         | 1910.9511      | 955.9792         | S    | 2294.0758 | 1147.5415       | 2277.0492      | 1139.0283        | 2276.0652      | 1138.5362        | 19 |
| 19 | 2057.0202 | 1029.0138       | 2039.9937      | 1020.5005        | 2039.0097      | 1020.0085        | Q    | 2207.0437 | 1104.0255       | 2190.0172      | 1095.5122        | 2189.0332      | 1095.0202        | 18 |
| 20 | 2170.1043 | 1085.5558       | 2153.0777      | 1077.0425        | 2152.0937      | 1076.5505        | L    | 2078.9852 | 1039.9962       | 2061.9586      | 1031.4829        | 2060.9746      | 1030.9909        | 17 |
| 21 | 2267.1571 | 1134.0822       | 2250.1305      | 1125.5689        | 2249.1465      | 1125.0769        | P    | 1965.9011 | 983.4542        | 1948.8746      | 974.9409         | 1947.8905      | 974.4489         | 16 |
| 22 | 2380.2411 | 1190.6242       | 2363.2146      | 1182.1109        | 2362.2306      | 1181.6189        | L    | 1868.8483 | 934.9278        | 1851.8218      | 926.4145         | 1850.8378      | 925.9225         | 15 |
| 23 | 2509.2837 | 1255.1455       | 2492.2572      | 1246.6322        | 2491.2732      | 1246.1402        | E    | 1755.7643 | 878.3858        | 1738.7377      | 869.8725         | 1737.7537      | 869.3805         | 14 |
| 24 | 2596.3157 | 1298.6615       | 2579.2892      | 1290.1482        | 2578.3052      | 1289.6562        | S    | 1626.7217 | 813.8645        | 1609.6951      | 805.3512         | 1608.7111      | 804.8592         | 13 |
| 25 | 2711.3427 | 1356.1750       | 2694.3161      | 1347.6617        | 2693.3321      | 1347.1697        | D    | 1539.6897 | 770.3485        | 1522.6631      | 761.8352         | 1521.6791      | 761.3432         | 12 |
| 26 | 2782.3798 | 1391.6935       | 2765.3533      | 1383.1803        | 2764.3692      | 1382.6883        | A    | 1424.6627 | 712.8350        | 1407.6362      | 704.3217         | 1406.6521      | 703.8297         | 11 |
| 27 | 2881.4482 | 1441.2277       | 2864.4217      | 1432.7145        | 2863.4377      | 1432.2225        | V    | 1353.6256 | 677.3164        | 1336.5991      | 668.8032         | 1335.6150      | 668.3112         | 10 |

|    |           |           |           |           |           |           |   |           |          |           |          |           |          |   |
|----|-----------|-----------|-----------|-----------|-----------|-----------|---|-----------|----------|-----------|----------|-----------|----------|---|
| 28 | 3010.4908 | 1505.7490 | 2993.4643 | 1497.2358 | 2992.4802 | 1496.7438 | E | 1254.5572 | 627.7822 | 1237.5306 | 619.2690 | 1236.5466 | 618.7769 | 9 |
| 29 | 3170.5215 | 1585.7644 | 3153.4949 | 1577.2511 | 3152.5109 | 1576.7591 | C | 1125.5146 | 563.2609 | 1108.4880 | 554.7477 |           |          | 8 |
| 30 | 3283.6055 | 1642.3064 | 3266.5790 | 1633.7931 | 3265.5950 | 1633.3011 | L | 965.4839  | 483.2456 | 948.4574  | 474.7323 |           |          | 7 |
| 31 | 3397.6484 | 1699.3279 | 3380.6219 | 1690.8146 | 3379.6379 | 1690.3226 | N | 852.3999  | 426.7036 | 835.3733  | 418.1903 |           |          | 6 |
| 32 | 3560.7118 | 1780.8595 | 3543.6852 | 1772.3463 | 3542.7012 | 1771.8542 | Y | 738.3570  | 369.6821 | 721.3304  | 361.1688 |           |          | 5 |
| 33 | 3688.7704 | 1844.8888 | 3671.7438 | 1836.3755 | 3670.7598 | 1835.8835 | Q | 575.2936  | 288.1504 | 558.2671  | 279.6372 |           |          | 4 |
| 34 | 3825.8293 | 1913.4183 | 3808.8027 | 1904.9050 | 3807.8187 | 1904.4130 | H | 447.2350  | 224.1212 | 430.2085  | 215.6079 |           |          | 3 |
| 35 | 3988.8926 | 1994.9499 | 3971.8660 | 1986.4367 | 3970.8820 | 1985.9447 | Y | 310.1761  | 155.5917 | 293.1496  | 147.0784 |           |          | 2 |
| 36 |           |           |           |           |           |           | K | 147.1128  | 74.0600  | 130.0863  | 65.5468  |           |          | 1 |

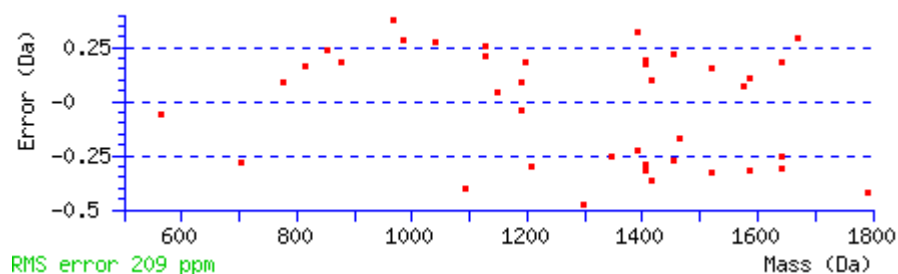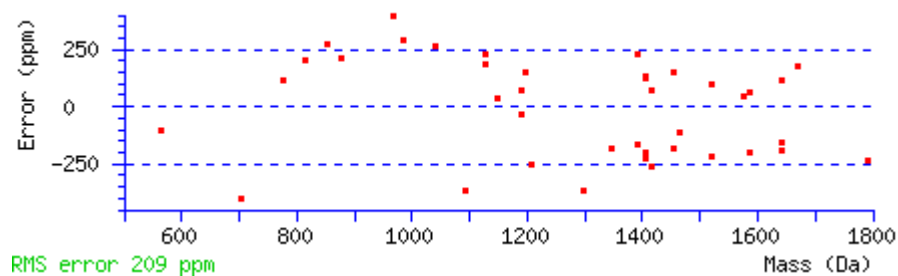

IDENTIFICATION 24

MS/MS Fragmentation of **GGVTGSPEASISGSK**

Found in **IPI00553798**

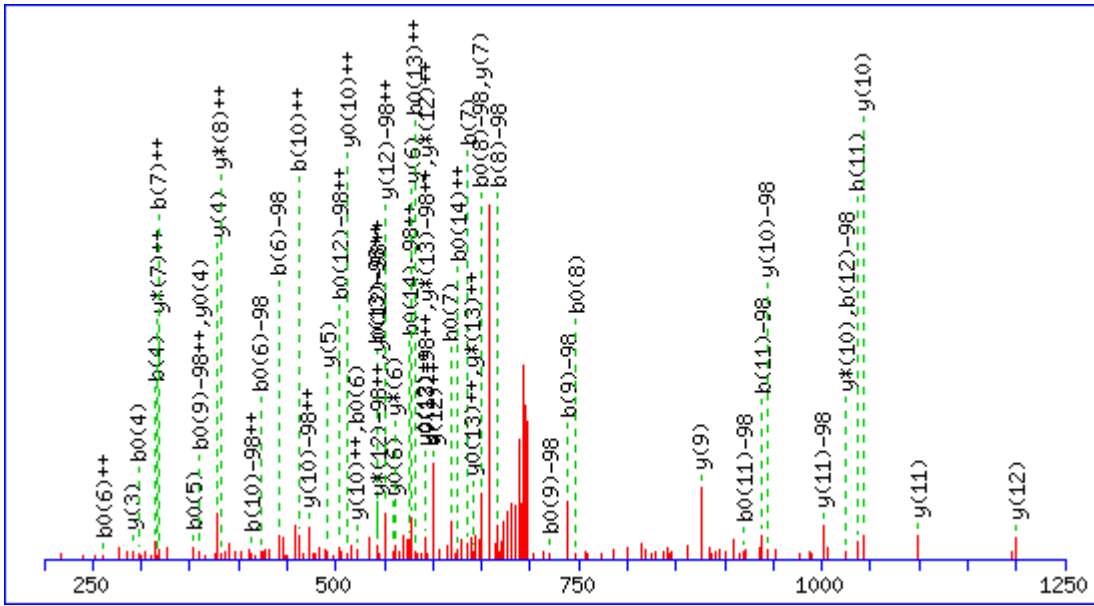

Monoisotopic mass of neutral peptide  $M_r(\text{calc})$ : 1412.6185

Fixed modifications: Carbamidomethyl (C) (apply to specified residues or termini only)

Variable modifications:

S6 : Phospho (ST), with neutral losses 97.9769 (shown in table), 0.0000

Ions Score: 25 Expect: 0.42 (help)

| #  | b         | b <sup>++</sup> | b <sup>0</sup> | b <sup>0++</sup> | Seq. | y         | y <sup>++</sup> | y <sup>*</sup> | y <sup>+++</sup> | y <sup>0</sup> | y <sup>0++</sup> | #  |
|----|-----------|-----------------|----------------|------------------|------|-----------|-----------------|----------------|------------------|----------------|------------------|----|
| 1  | 58.0287   | 29.5180         |                |                  | G    |           |                 |                |                  |                |                  | 15 |
| 2  | 115.0502  | 58.0287         |                |                  | G    | 1258.6274 | 629.8173        | 1241.6008      | 621.3040         | 1240.6168      | 620.8120         | 14 |
| 3  | 214.1186  | 107.5629        |                |                  | V    | 1201.6059 | 601.3066        | 1184.5794      | 592.7933         | 1183.5953      | 592.3013         | 13 |
| 4  | 315.1663  | 158.0868        | 297.1557       | 149.0815         | T    | 1102.5375 | 551.7724        | 1085.5109      | 543.2591         | 1084.5269      | 542.7671         | 12 |
| 5  | 372.1878  | 186.5975        | 354.1772       | 177.5922         | G    | 1001.4898 | 501.2485        | 984.4633       | 492.7353         | 983.4792       | 492.2433         | 11 |
| 6  | 441.2092  | 221.1082        | 423.1987       | 212.1030         | S    | 944.4684  | 472.7378        | 927.4418       | 464.2245         | 926.4578       | 463.7325         | 10 |
| 7  | 538.2620  | 269.6346        | 520.2514       | 260.6293         | P    | 875.4469  | 438.2271        | 858.4203       | 429.7138         | 857.4363       | 429.2218         | 9  |
| 8  | 667.3046  | 334.1559        | 649.2940       | 325.1506         | E    | 778.3941  | 389.7007        | 761.3676       | 381.1874         | 760.3836       | 380.6954         | 8  |
| 9  | 738.3417  | 369.6745        | 720.3311       | 360.6692         | A    | 649.3515  | 325.1794        | 632.3250       | 316.6661         | 631.3410       | 316.1741         | 7  |
| 10 | 825.3737  | 413.1905        | 807.3632       | 404.1852         | S    | 578.3144  | 289.6608        | 561.2879       | 281.1476         | 560.3039       | 280.6556         | 6  |
| 11 | 938.4578  | 469.7325        | 920.4472       | 460.7272         | I    | 491.2824  | 246.1448        | 474.2558       | 237.6316         | 473.2718       | 237.1395         | 5  |
| 12 | 1025.4898 | 513.2485        | 1007.4793      | 504.2433         | S    | 378.1983  | 189.6028        | 361.1718       | 181.0895         | 360.1878       | 180.5975         | 4  |
| 13 | 1082.5113 | 541.7593        | 1064.5007      | 532.7540         | G    | 291.1663  | 146.0868        | 274.1397       | 137.5735         | 273.1557       | 137.0815         | 3  |
| 14 | 1169.5433 | 585.2753        | 1151.5327      | 576.2700         | S    | 234.1448  | 117.5761        | 217.1183       | 109.0628         | 216.1343       | 108.5708         | 2  |
| 15 |           |                 |                |                  | K    | 147.1128  | 74.0600         | 130.0863       | 65.5468          |                |                  | 1  |

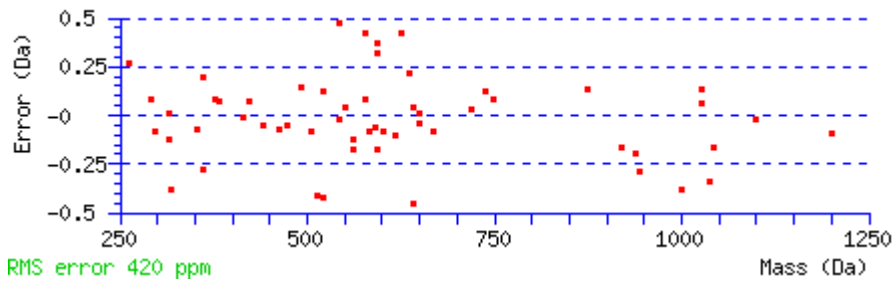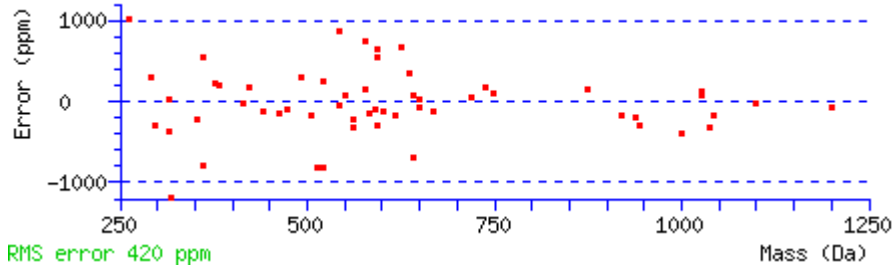

IDENTIFICATION 25

MS/MS Fragmentation of **SSTPLPTVSSSAENTR**

Found in **IPI00126338**

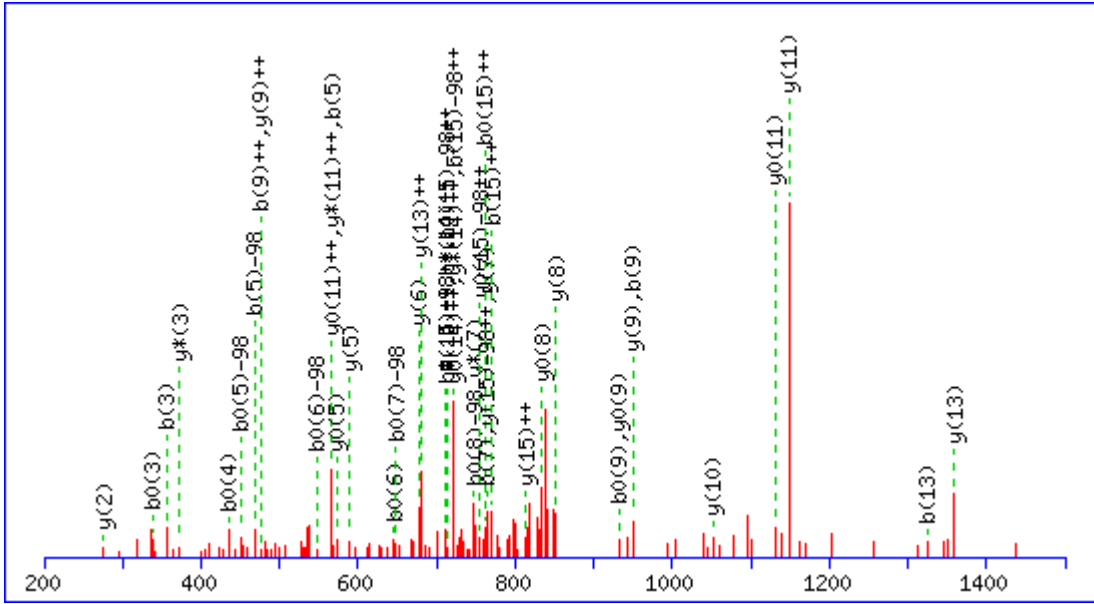

Monoisotopic mass of neutral peptide Mr(calc): 1712.7618

Fixed modifications: Carbamidomethyl (C) (apply to specified residues or termini only)

Variable modifications:

S2 : Phospho (ST), with neutral losses 0.0000(shown in table), 97.9769

Ions Score: 39 Expect: 0.021 (help)

| #  | b         | b <sup>++</sup> | b <sup>*</sup> | b <sup>+++</sup> | b <sup>0</sup> | b <sup>0++</sup> | Seq. | y         | y <sup>++</sup> | y <sup>*</sup> | y <sup>+++</sup> | y <sup>0</sup> | y <sup>0++</sup> | #  |
|----|-----------|-----------------|----------------|------------------|----------------|------------------|------|-----------|-----------------|----------------|------------------|----------------|------------------|----|
| 1  | 88.0393   | 44.5233         |                |                  | 70.0287        | 35.5180          | S    |           |                 |                |                  |                |                  | 16 |
| 2  | 255.0377  | 128.0225        |                |                  | 237.0271       | 119.0172         | S    | 1626.7371 | 813.8722        | 1609.7105      | 805.3589         | 1608.7265      | 804.8669         | 15 |
| 3  | 356.0853  | 178.5463        |                |                  | 338.0748       | 169.5410         | T    | 1459.7387 | 730.3730        | 1442.7122      | 721.8597         | 1441.7281      | 721.3677         | 14 |
| 4  | 453.1381  | 227.0727        |                |                  | 435.1275       | 218.0674         | P    | 1358.6910 | 679.8492        | 1341.6645      | 671.3359         | 1340.6805      | 670.8439         | 13 |
| 5  | 566.2222  | 283.6147        |                |                  | 548.2116       | 274.6094         | L    | 1261.6383 | 631.3228        | 1244.6117      | 622.8095         | 1243.6277      | 622.3175         | 12 |
| 6  | 663.2749  | 332.1411        |                |                  | 645.2644       | 323.1358         | P    | 1148.5542 | 574.7807        | 1131.5277      | 566.2675         | 1130.5436      | 565.7755         | 11 |
| 7  | 764.3226  | 382.6649        |                |                  | 746.3120       | 373.6597         | T    | 1051.5014 | 526.2544        | 1034.4749      | 517.7411         | 1033.4909      | 517.2491         | 10 |
| 8  | 863.3910  | 432.1992        |                |                  | 845.3805       | 423.1939         | V    | 950.4538  | 475.7305        | 933.4272       | 467.2172         | 932.4432       | 466.7252         | 9  |
| 9  | 950.4231  | 475.7152        |                |                  | 932.4125       | 466.7099         | S    | 851.3853  | 426.1963        | 834.3588       | 417.6830         | 833.3748       | 417.1910         | 8  |
| 10 | 1037.4551 | 519.2312        |                |                  | 1019.4445      | 510.2259         | S    | 764.3533  | 382.6803        | 747.3268       | 374.1670         | 746.3428       | 373.6750         | 7  |
| 11 | 1124.4871 | 562.7472        |                |                  | 1106.4765      | 553.7419         | S    | 677.3213  | 339.1643        | 660.2947       | 330.6510         | 659.3107       | 330.1590         | 6  |
| 12 | 1195.5242 | 598.2658        |                |                  | 1177.5137      | 589.2605         | A    | 590.2893  | 295.6483        | 573.2627       | 287.1350         | 572.2787       | 286.6430         | 5  |
| 13 | 1324.5668 | 662.7870        |                |                  | 1306.5563      | 653.7818         | E    | 519.2522  | 260.1297        | 502.2256       | 251.6164         | 501.2416       | 251.1244         | 4  |
| 14 | 1438.6097 | 719.8085        | 1421.5832      | 711.2952         | 1420.5992      | 710.8032         | N    | 390.2096  | 195.6084        | 373.1830       | 187.0951         | 372.1990       | 186.6031         | 3  |
| 15 | 1539.6574 | 770.3324        | 1522.6309      | 761.8191         | 1521.6469      | 761.3271         | T    | 276.1666  | 138.5870        | 259.1401       | 130.0737         | 258.1561       | 129.5817         | 2  |
| 16 |           |                 |                |                  |                |                  | R    | 175.1190  | 88.0631         | 158.0924       | 79.5498          |                |                  | 1  |

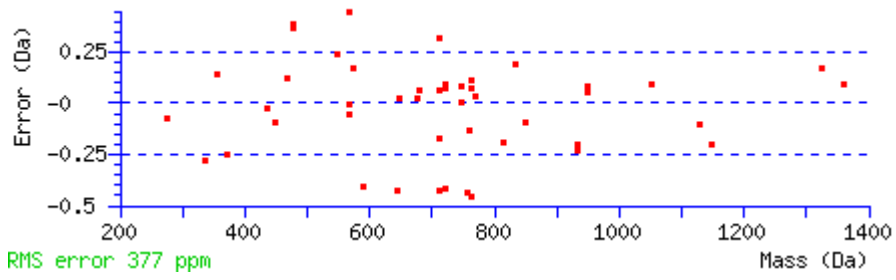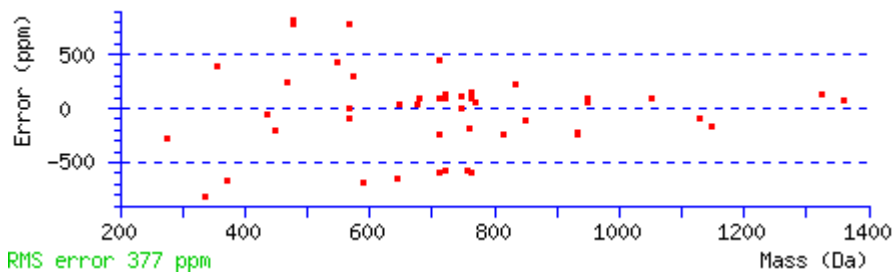

IDENTIFICATION 26

MS/MS Fragmentation of SKESLQEAGK

Found in IPI00137194

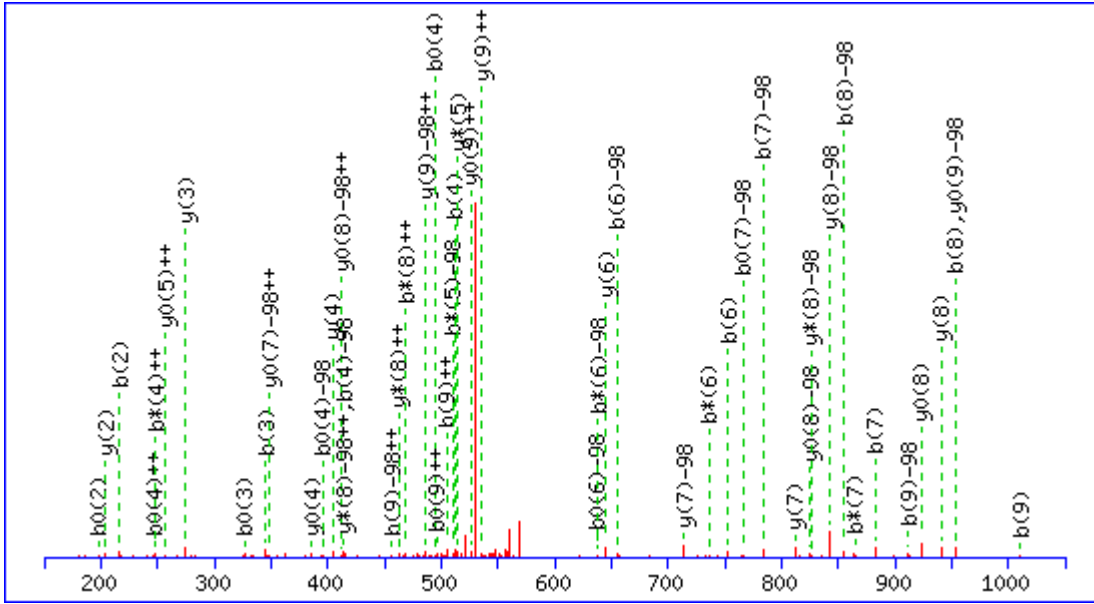

Monoisotopic mass of neutral peptide Mr(calc): 1155.5172

Fixed modifications: Carbamidomethyl (C) (apply to specified residues or termini only)

Variable modifications:

S4 : Phospho (ST), with neutral losses 97.9769 (shown in table), 0.0000

Ions Score: 48 Expect: 0.0018 (help)

| #  | b        | b <sup>++</sup> | b <sup>*</sup> | b <sup>+++</sup> | b <sup>0</sup> | b <sup>0++</sup> | Seq. | y        | y <sup>++</sup> | y <sup>*</sup> | y <sup>+++</sup> | y <sup>0</sup> | y <sup>0++</sup> | #  |
|----|----------|-----------------|----------------|------------------|----------------|------------------|------|----------|-----------------|----------------|------------------|----------------|------------------|----|
| 1  | 88.0393  | 44.5233         |                |                  | 70.0287        | 35.5180          | S    |          |                 |                |                  |                |                  | 10 |
| 2  | 216.1343 | 108.5708        | 199.1077       | 100.0575         | 198.1237       | 99.5655          | K    | 971.5156 | 486.2615        | 954.4891       | 477.7482         | 953.5051       | 477.2562         | 9  |
| 3  | 345.1769 | 173.0921        | 328.1503       | 164.5788         | 327.1663       | 164.0868         | E    | 843.4207 | 422.2140        | 826.3941       | 413.7007         | 825.4101       | 413.2087         | 8  |
| 4  | 414.1983 | 207.6028        | 397.1718       | 199.0895         | 396.1878       | 198.5975         | S    | 714.3781 | 357.6927        | 697.3515       | 349.1794         | 696.3675       | 348.6874         | 7  |
| 5  | 527.2824 | 264.1448        | 510.2558       | 255.6316         | 509.2718       | 255.1395         | L    | 645.3566 | 323.1819        | 628.3301       | 314.6687         | 627.3461       | 314.1767         | 6  |
| 6  | 655.3410 | 328.1741        | 638.3144       | 319.6608         | 637.3304       | 319.1688         | Q    | 532.2726 | 266.6399        | 515.2460       | 258.1266         | 514.2620       | 257.6346         | 5  |
| 7  | 784.3836 | 392.6954        | 767.3570       | 384.1821         | 766.3730       | 383.6901         | E    | 404.2140 | 202.6106        | 387.1874       | 194.0974         | 386.2034       | 193.6053         | 4  |
| 8  | 855.4207 | 428.2140        | 838.3941       | 419.7007         | 837.4101       | 419.2087         | A    | 275.1714 | 138.0893        | 258.1448       | 129.5761         |                |                  | 3  |
| 9  | 912.4421 | 456.7247        | 895.4156       | 448.2114         | 894.4316       | 447.7194         | G    | 204.1343 | 102.5708        | 187.1077       | 94.0575          |                |                  | 2  |
| 10 |          |                 |                |                  |                |                  | K    | 147.1128 | 74.0600         | 130.0863       | 65.5468          |                |                  | 1  |

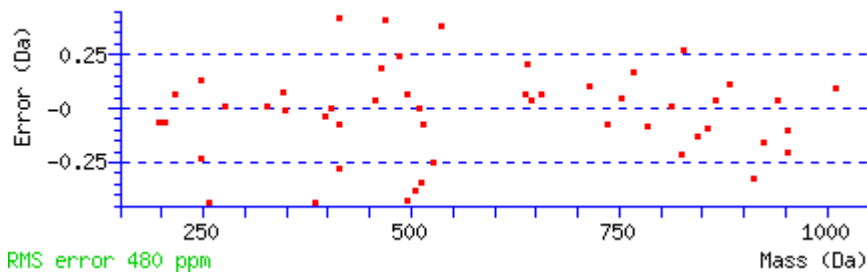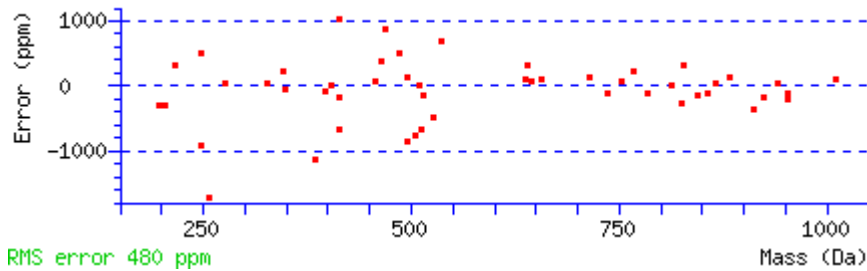



IDENTIFICATION 27

MS/MS Fragmentation of IEDVGSDEEDDSGKDK

Found in IPI00229080

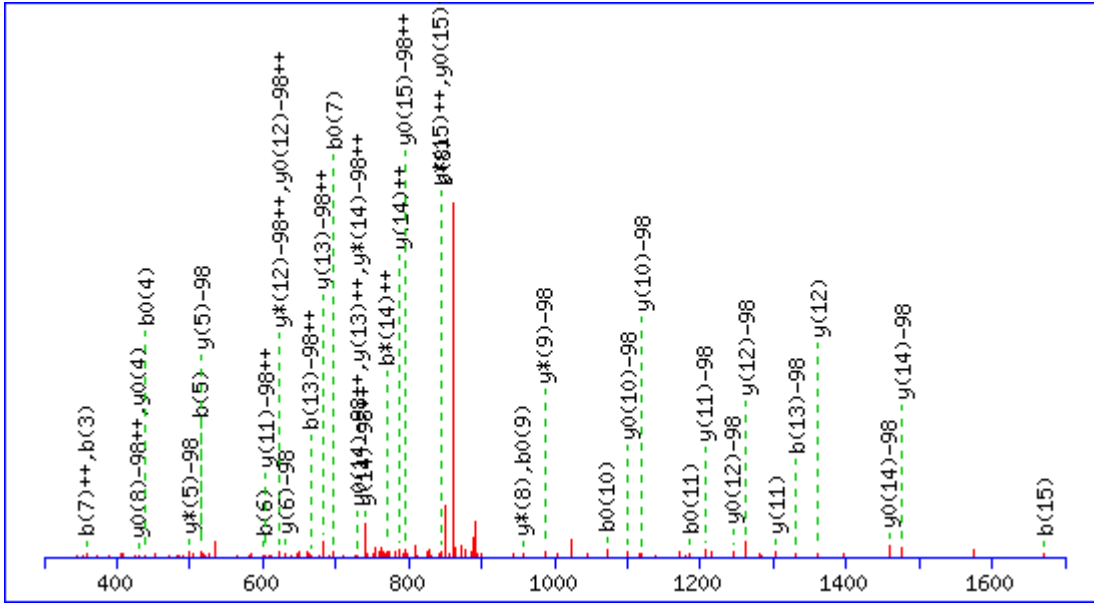

Monoisotopic mass of neutral peptide Mr(calc): 1816.6888

Fixed modifications: Carbamidomethyl (C) (apply to specified residues or termini only)

Variable modifications:

S12 : Phospho (ST), with neutral losses 97.9769 (shown in table), 0.0000

Ions Score: 30 Expect: 0.14 (help)

| #  | b         | b <sup>++</sup> | b <sup>*</sup> | b <sup>+++</sup> | b <sup>0</sup> | b <sup>0++</sup> | Seq. | y         | y <sup>++</sup> | y <sup>*</sup> | y <sup>+++</sup> | y <sup>0</sup> | y <sup>0++</sup> | #  |
|----|-----------|-----------------|----------------|------------------|----------------|------------------|------|-----------|-----------------|----------------|------------------|----------------|------------------|----|
| 1  | 114.0913  | 57.5493         |                |                  |                |                  | I    |           |                 |                |                  |                |                  | 16 |
| 2  | 243.1339  | 122.0706        |                |                  | 225.1234       | 113.0653         | E    | 1606.6351 | 803.8212        | 1589.6085      | 795.3079         | 1588.6245      | 794.8159         | 15 |
| 3  | 358.1609  | 179.5841        |                |                  | 340.1503       | 170.5788         | D    | 1477.5925 | 739.2999        | 1460.5660      | 730.7866         | 1459.5819      | 730.2946         | 14 |
| 4  | 457.2293  | 229.1183        |                |                  | 439.2187       | 220.1130         | V    | 1362.5656 | 681.7864        | 1345.5390      | 673.2731         | 1344.5550      | 672.7811         | 13 |
| 5  | 514.2508  | 257.6290        |                |                  | 496.2402       | 248.6237         | G    | 1263.4971 | 632.2522        | 1246.4706      | 623.7389         | 1245.4866      | 623.2469         | 12 |
| 6  | 601.2828  | 301.1450        |                |                  | 583.2722       | 292.1397         | S    | 1206.4757 | 603.7415        | 1189.4491      | 595.2282         | 1188.4651      | 594.7362         | 11 |
| 7  | 716.3097  | 358.6585        |                |                  | 698.2992       | 349.6532         | D    | 1119.4437 | 560.2255        | 1102.4171      | 551.7122         | 1101.4331      | 551.2202         | 10 |
| 8  | 845.3523  | 423.1798        |                |                  | 827.3418       | 414.1745         | E    | 1004.4167 | 502.7120        | 987.3902       | 494.1987         | 986.4061       | 493.7067         | 9  |
| 9  | 974.3949  | 487.7011        |                |                  | 956.3843       | 478.6958         | E    | 875.3741  | 438.1907        | 858.3476       | 429.6774         | 857.3636       | 429.1854         | 8  |
| 10 | 1089.4219 | 545.2146        |                |                  | 1071.4113      | 536.2093         | D    | 746.3315  | 373.6694        | 729.3050       | 365.1561         | 728.3210       | 364.6641         | 7  |
| 11 | 1204.4488 | 602.7280        |                |                  | 1186.4382      | 593.7228         | D    | 631.3046  | 316.1559        | 614.2780       | 307.6427         | 613.2940       | 307.1506         | 6  |
| 12 | 1273.4703 | 637.2388        |                |                  | 1255.4597      | 628.2335         | S    | 516.2776  | 258.6425        | 499.2511       | 250.1292         | 498.2671       | 249.6372         | 5  |
| 13 | 1330.4917 | 665.7495        |                |                  | 1312.4812      | 656.7442         | G    | 447.2562  | 224.1317        | 430.2296       | 215.6185         | 429.2456       | 215.1264         | 4  |
| 14 | 1458.5867 | 729.7970        | 1441.5601      | 721.2837         | 1440.5761      | 720.7917         | K    | 390.2347  | 195.6210        | 373.2082       | 187.1077         | 372.2241       | 186.6157         | 3  |
| 15 | 1573.6136 | 787.3105        | 1556.5871      | 778.7972         | 1555.6031      | 778.3052         | D    | 262.1397  | 131.5735        | 245.1132       | 123.0602         | 244.1292       | 122.5682         | 2  |
| 16 |           |                 |                |                  |                |                  | K    | 147.1128  | 74.0600         | 130.0863       | 65.5468          |                |                  | 1  |

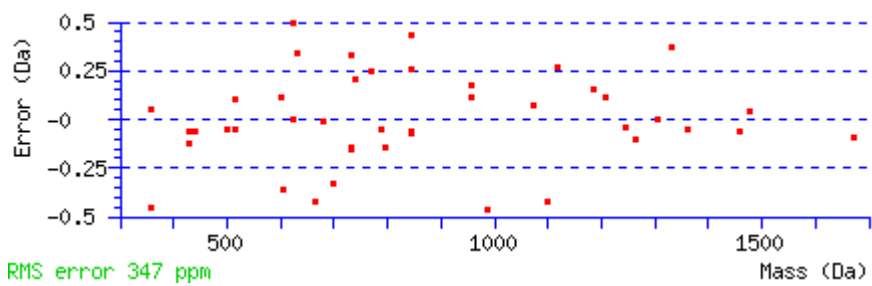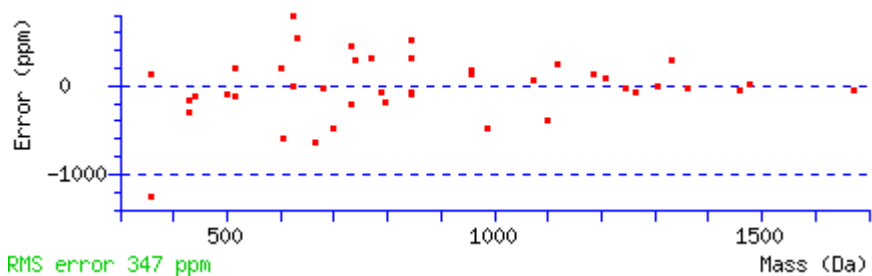

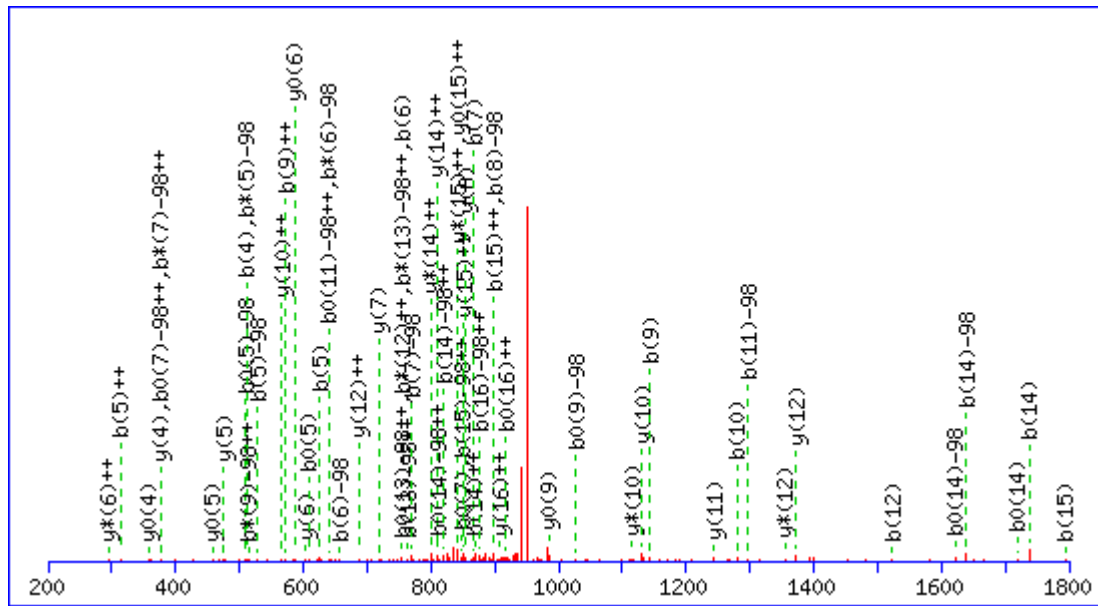

Monoisotopic mass of neutral peptide Mr(calc): 1996.8528

Fixed modifications: Carbamidomethyl (C) (apply to specified residues or termini only)

Variable modifications:

T1 : Phospho (ST), with neutral losses 0.0000(shown in table), 97.9769

Ions Score: 36 Expect: 0.049 (help)

| #  | b         | b <sup>++</sup> | b <sup>*</sup> | b <sup>+++</sup> | b <sup>0</sup> | b <sup>0++</sup> | Seq. | y         | y <sup>++</sup> | y <sup>*</sup> | y <sup>+++</sup> | y <sup>0</sup> | y <sup>0++</sup> | #  |
|----|-----------|-----------------|----------------|------------------|----------------|------------------|------|-----------|-----------------|----------------|------------------|----------------|------------------|----|
| 1  | 182.0213  | 91.5143         |                |                  | 164.0107       | 82.5090          | T    |           |                 |                |                  |                |                  | 17 |
| 2  | 296.0642  | 148.5357        | 279.0377       | 140.0225         | 278.0536       | 139.5305         | N    | 1816.8460 | 908.9267        | 1799.8195      | 900.4134         | 1798.8355      | 899.9214         | 16 |
| 3  | 383.0962  | 192.0518        | 366.0697       | 183.5385         | 365.0857       | 183.0465         | S    | 1702.8031 | 851.9052        | 1685.7766      | 843.3919         | 1684.7925      | 842.8999         | 15 |
| 4  | 511.1548  | 256.0810        | 494.1283       | 247.5678         | 493.1443       | 247.0758         | Q    | 1615.7711 | 808.3892        | 1598.7445      | 799.8759         | 1597.7605      | 799.3839         | 14 |
| 5  | 626.1818  | 313.5945        | 609.1552       | 305.0812         | 608.1712       | 304.5892         | D    | 1487.7125 | 744.3599        | 1470.6859      | 735.8466         | 1469.7019      | 735.3546         | 13 |
| 6  | 754.2767  | 377.6420        | 737.2502       | 369.1287         | 736.2662       | 368.6367         | K    | 1372.6856 | 686.8464        | 1355.6590      | 678.3331         | 1354.6750      | 677.8411         | 12 |
| 7  | 867.3608  | 434.1840        | 850.3342       | 425.6708         | 849.3502       | 425.1788         | I    | 1244.5906 | 622.7989        | 1227.5640      | 614.2857         | 1226.5800      | 613.7937         | 11 |
| 8  | 996.4034  | 498.7053        | 979.3768       | 490.1921         | 978.3928       | 489.7000         | E    | 1131.5065 | 566.2569        | 1114.4800      | 557.7436         | 1113.4960      | 557.2516         | 10 |
| 9  | 1143.4718 | 572.2395        | 1126.4452      | 563.7263         | 1125.4612      | 563.2343         | F    | 1002.4639 | 501.7356        | 985.4374       | 493.2223         | 984.4534       | 492.7303         | 9  |
| 10 | 1280.5307 | 640.7690        | 1263.5042      | 632.2557         | 1262.5201      | 631.7637         | H    | 855.3955  | 428.2014        | 838.3690       | 419.6881         | 837.3850       | 419.1961         | 8  |
| 11 | 1394.5736 | 697.7905        | 1377.5471      | 689.2772         | 1376.5631      | 688.7852         | N    | 718.3366  | 359.6719        | 701.3101       | 351.1587         | 700.3260       | 350.6667         | 7  |
| 12 | 1523.6162 | 762.3118        | 1506.5897      | 753.7985         | 1505.6057      | 753.3065         | E    | 604.2937  | 302.6505        | 587.2671       | 294.1372         | 586.2831       | 293.6452         | 6  |
| 13 | 1622.6846 | 811.8460        | 1605.6581      | 803.3327         | 1604.6741      | 802.8407         | V    | 475.2511  | 238.1292        | 458.2245       | 229.6159         | 457.2405       | 229.1239         | 5  |
| 14 | 1737.7116 | 869.3594        | 1720.6850      | 860.8462         | 1719.7010      | 860.3541         | D    | 376.1827  | 188.5950        | 359.1561       | 180.0817         | 358.1721       | 179.5897         | 4  |
| 15 | 1794.7330 | 897.8702        | 1777.7065      | 889.3569         | 1776.7225      | 888.8649         | G    | 261.1557  | 131.0815        | 244.1292       | 122.5682         |                |                  | 3  |
| 16 | 1851.7545 | 926.3809        | 1834.7280      | 917.8676         | 1833.7439      | 917.3756         | G    | 204.1343  | 102.5708        | 187.1077       | 94.0575          |                |                  | 2  |
| 17 |           |                 |                |                  |                |                  | K    | 147.1128  | 74.0600         | 130.0863       | 65.5468          |                |                  | 1  |

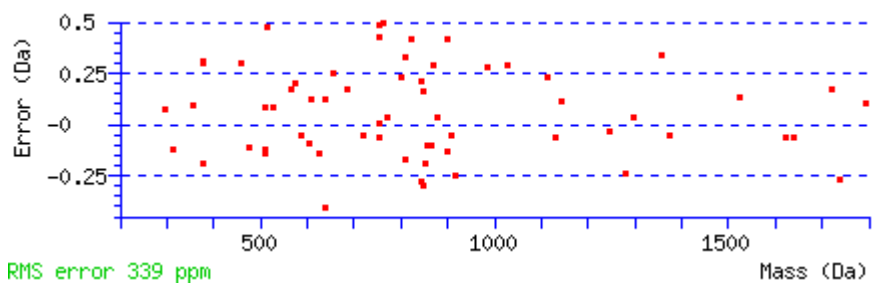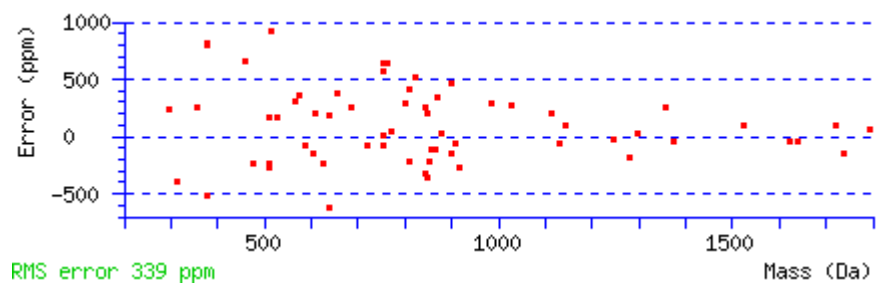

IDENTIFICATION 29

MS/MS Fragmentation of **GRLSPVPVPR**

Found in **IPI00130147**

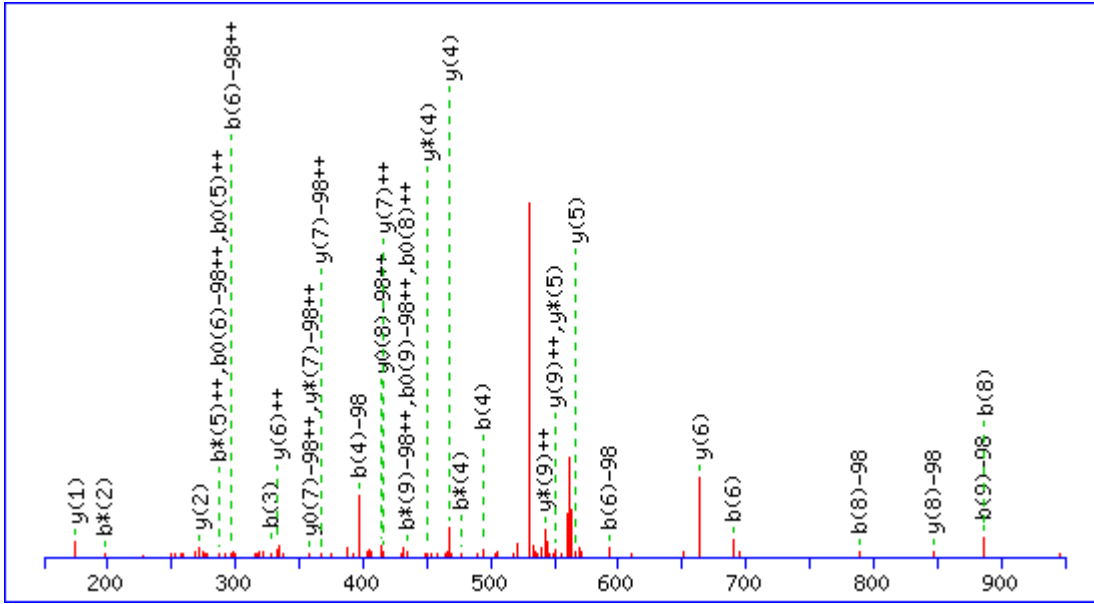

Monoisotopic mass of neutral peptide  $M_r(\text{calc})$ : 1156.6118

Fixed modifications: Carbamidomethyl (C) (apply to specified residues or termini only)

Variable modifications:

S4 : Phospho (ST), with neutral losses 97.9769 (shown in table), 0.0000

Ions Score: 35 Expect: 0.023 (help)

| #  | b        | b <sup>++</sup> | b <sup>*</sup> | b <sup>+++</sup> | b <sup>0</sup> | b <sup>0++</sup> | Seq. | y         | y <sup>++</sup> | y <sup>*</sup> | y <sup>+++</sup> | y <sup>0</sup> | y <sup>0++</sup> | #  |
|----|----------|-----------------|----------------|------------------|----------------|------------------|------|-----------|-----------------|----------------|------------------|----------------|------------------|----|
| 1  | 58.0287  | 29.5180         |                |                  |                |                  | G    |           |                 |                |                  |                |                  | 10 |
| 2  | 214.1299 | 107.5686        | 197.1033       | 99.0553          |                |                  | R    | 1002.6207 | 501.8140        | 985.5942       | 493.3007         | 984.6101       | 492.8087         | 9  |
| 3  | 327.2139 | 164.1106        | 310.1874       | 155.5973         |                |                  | L    | 846.5196  | 423.7634        | 829.4930       | 415.2502         | 828.5090       | 414.7582         | 8  |
| 4  | 396.2354 | 198.6213        | 379.2088       | 190.1081         | 378.2248       | 189.6160         | S    | 733.4355  | 367.2214        | 716.4090       | 358.7081         | 715.4250       | 358.2161         | 7  |
| 5  | 493.2881 | 247.1477        | 476.2616       | 238.6344         | 475.2776       | 238.1424         | P    | 664.4141  | 332.7107        | 647.3875       | 324.1974         |                |                  | 6  |
| 6  | 592.3566 | 296.6819        | 575.3300       | 288.1686         | 574.3460       | 287.6766         | V    | 567.3613  | 284.1843        | 550.3348       | 275.6710         |                |                  | 5  |
| 7  | 689.4093 | 345.2083        | 672.3828       | 336.6950         | 671.3988       | 336.2030         | P    | 468.2929  | 234.6501        | 451.2663       | 226.1368         |                |                  | 4  |
| 8  | 788.4777 | 394.7425        | 771.4512       | 386.2292         | 770.4672       | 385.7372         | V    | 371.2401  | 186.1237        | 354.2136       | 177.6104         |                |                  | 3  |
| 9  | 885.5305 | 443.2689        | 868.5039       | 434.7556         | 867.5199       | 434.2636         | P    | 272.1717  | 136.5895        | 255.1452       | 128.0762         |                |                  | 2  |
| 10 |          |                 |                |                  |                |                  | R    | 175.1190  | 88.0631         | 158.0924       | 79.5498          |                |                  | 1  |

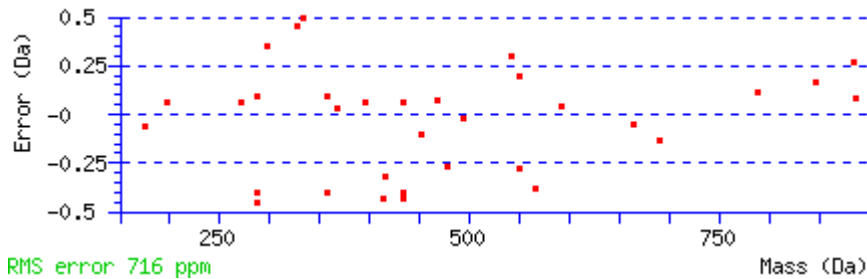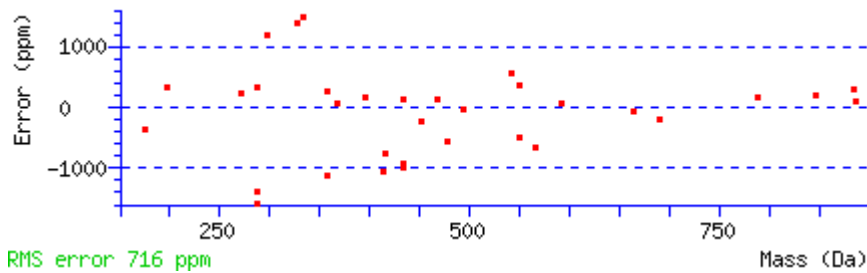

IDENTIFICATION 30

MS/MS Fragmentation of **IGHHSTSDSSAYR**

Found in **IPI00331555**

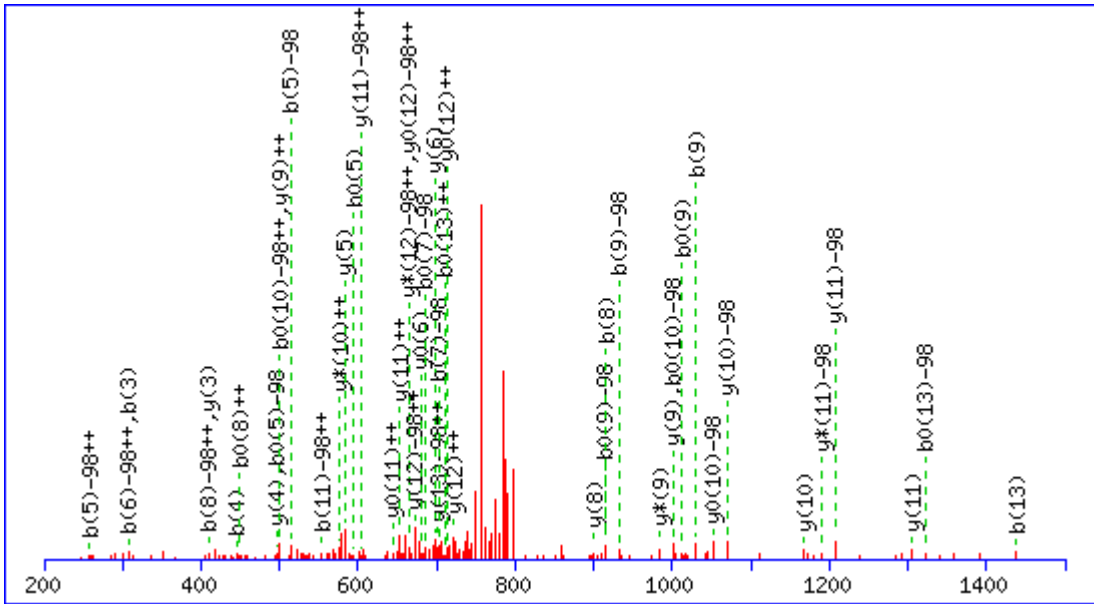

Monoisotopic mass of neutral peptide Mr(calc): 1611.6315

Fixed modifications: Carbamidomethyl (C) (apply to specified residues or termini only)

Variable modifications:

S5 : Phospho (ST), with neutral losses 97.9769 (shown in table), 0.0000

Ions Score: 30 Expect: 0.11 (help)

| #  | b         | b <sup>++</sup> | b <sup>0</sup> | b <sup>0++</sup> | Seq. | y         | y <sup>++</sup> | y <sup>*</sup> | y <sup>+++</sup> | y <sup>0</sup> | y <sup>0++</sup> | #  |
|----|-----------|-----------------|----------------|------------------|------|-----------|-----------------|----------------|------------------|----------------|------------------|----|
| 1  | 114.0913  | 57.5493         |                |                  | I    |           |                 |                |                  |                |                  | 14 |
| 2  | 171.1128  | 86.0600         |                |                  | G    | 1401.5778 | 701.2925        | 1384.5512      | 692.7793         | 1383.5672      | 692.2873         | 13 |
| 3  | 308.1717  | 154.5895        |                |                  | H    | 1344.5563 | 672.7818        | 1327.5298      | 664.2685         | 1326.5458      | 663.7765         | 12 |
| 4  | 445.2306  | 223.1190        |                |                  | H    | 1207.4974 | 604.2523        | 1190.4709      | 595.7391         | 1189.4869      | 595.2471         | 11 |
| 5  | 514.2521  | 257.6297        | 496.2415       | 248.6244         | S    | 1070.4385 | 535.7229        | 1053.4120      | 527.2096         | 1052.4279      | 526.7176         | 10 |
| 6  | 615.2998  | 308.1535        | 597.2892       | 299.1482         | T    | 1001.4170 | 501.2122        | 984.3905       | 492.6989         | 983.4065       | 492.2069         | 9  |
| 7  | 702.3318  | 351.6695        | 684.3212       | 342.6643         | S    | 900.3694  | 450.6883        | 883.3428       | 442.1750         | 882.3588       | 441.6830         | 8  |
| 8  | 817.3587  | 409.1830        | 799.3482       | 400.1777         | D    | 813.3373  | 407.1723        | 796.3108       | 398.6590         | 795.3268       | 398.1670         | 7  |
| 9  | 932.3857  | 466.6965        | 914.3751       | 457.6912         | D    | 698.3104  | 349.6588        | 681.2838       | 341.1456         | 680.2998       | 340.6536         | 6  |
| 10 | 1019.4177 | 510.2125        | 1001.4071      | 501.2072         | S    | 583.2835  | 292.1454        | 566.2569       | 283.6321         | 565.2729       | 283.1401         | 5  |
| 11 | 1106.4497 | 553.7285        | 1088.4392      | 544.7232         | S    | 496.2514  | 248.6293        | 479.2249       | 240.1161         | 478.2409       | 239.6241         | 4  |
| 12 | 1177.4869 | 589.2471        | 1159.4763      | 580.2418         | A    | 409.2194  | 205.1133        | 392.1928       | 196.6001         |                |                  | 3  |
| 13 | 1340.5502 | 670.7787        | 1322.5396      | 661.7734         | Y    | 338.1823  | 169.5948        | 321.1557       | 161.0815         |                |                  | 2  |
| 14 |           |                 |                |                  | R    | 175.1190  | 88.0631         | 158.0924       | 79.5498          |                |                  | 1  |

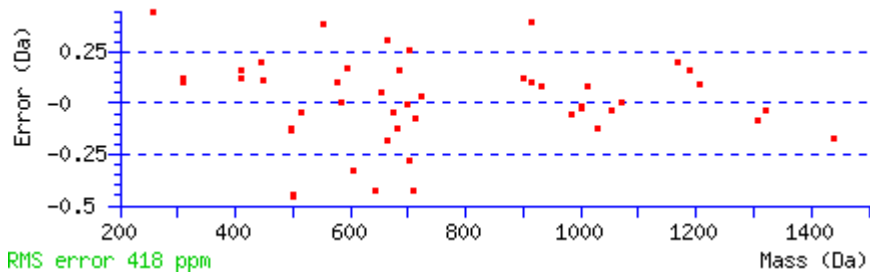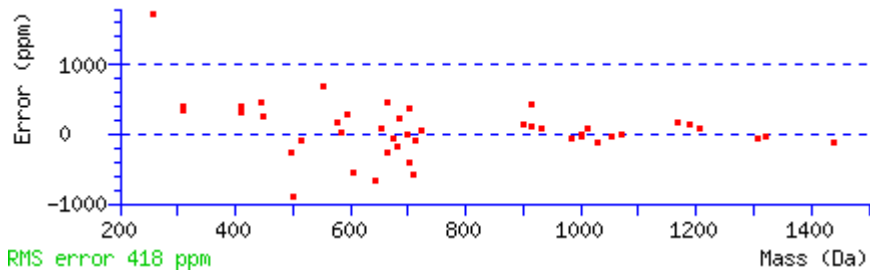

IDENTIFICATION 31

MS/MS Fragmentation of **RGSFEAGR**

Found in **IPI00461575**

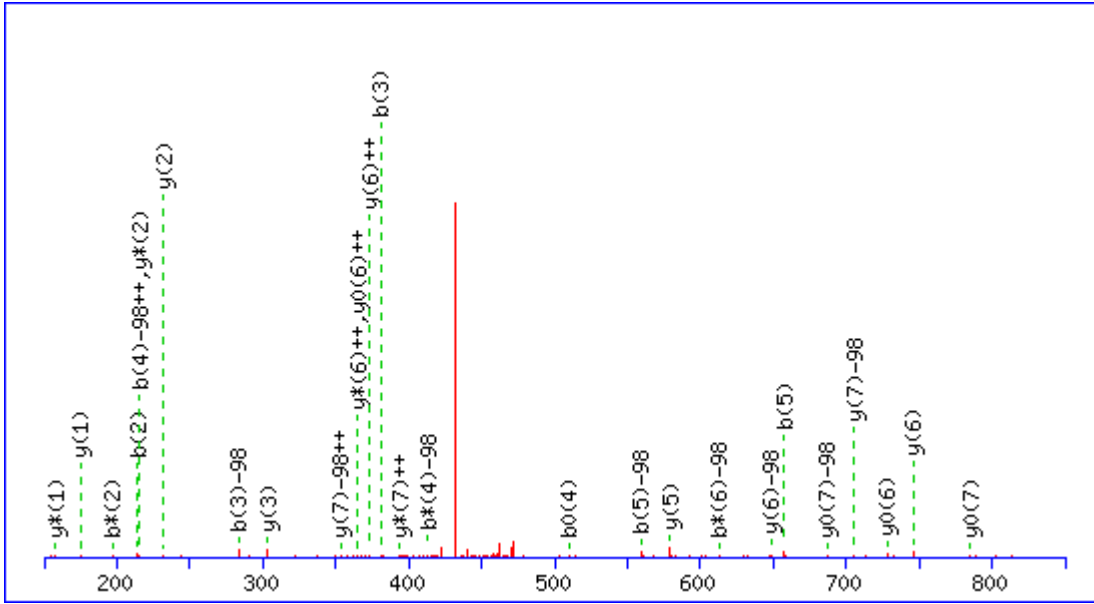

Monoisotopic mass of neutral peptide  $M_r(\text{calc})$ : 958.4022

Fixed modifications: Carbamidomethyl (C) (apply to specified residues or termini only)

Variable modifications:

S3 : Phospho (ST), with neutral losses 97.9769 (shown in table), 0.0000

Ions Score: 36 Expect: 0.014 (help)

| # | b        | b <sup>++</sup> | b <sup>*</sup> | b <sup>+++</sup> | b <sup>0</sup> | b <sup>0++</sup> | Seq. | y        | y <sup>++</sup> | y <sup>*</sup> | y <sup>+++</sup> | y <sup>0</sup> | y <sup>0++</sup> | # |
|---|----------|-----------------|----------------|------------------|----------------|------------------|------|----------|-----------------|----------------|------------------|----------------|------------------|---|
| 1 | 157.1084 | 79.0578         | 140.0818       | 70.5446          |                |                  | R    |          |                 |                |                  |                |                  | 8 |
| 2 | 214.1299 | 107.5686        | 197.1033       | 99.0553          |                |                  | G    | 705.3315 | 353.1694        | 688.3049       | 344.6561         | 687.3209       | 344.1641         | 7 |
| 3 | 283.1513 | 142.0793        | 266.1248       | 133.5660         | 265.1407       | 133.0740         | S    | 648.3100 | 324.6586        | 631.2835       | 316.1454         | 630.2994       | 315.6534         | 6 |
| 4 | 430.2197 | 215.6135        | 413.1932       | 207.1002         | 412.2092       | 206.6082         | F    | 579.2885 | 290.1479        | 562.2620       | 281.6346         | 561.2780       | 281.1426         | 5 |
| 5 | 559.2623 | 280.1348        | 542.2358       | 271.6215         | 541.2518       | 271.1295         | E    | 432.2201 | 216.6137        | 415.1936       | 208.1004         | 414.2096       | 207.6084         | 4 |
| 6 | 630.2994 | 315.6534        | 613.2729       | 307.1401         | 612.2889       | 306.6481         | A    | 303.1775 | 152.0924        | 286.1510       | 143.5791         |                |                  | 3 |
| 7 | 687.3209 | 344.1641        | 670.2944       | 335.6508         | 669.3103       | 335.1588         | G    | 232.1404 | 116.5738        | 215.1139       | 108.0606         |                |                  | 2 |
| 8 |          |                 |                |                  |                |                  | R    | 175.1190 | 88.0631         | 158.0924       | 79.5498          |                |                  | 1 |

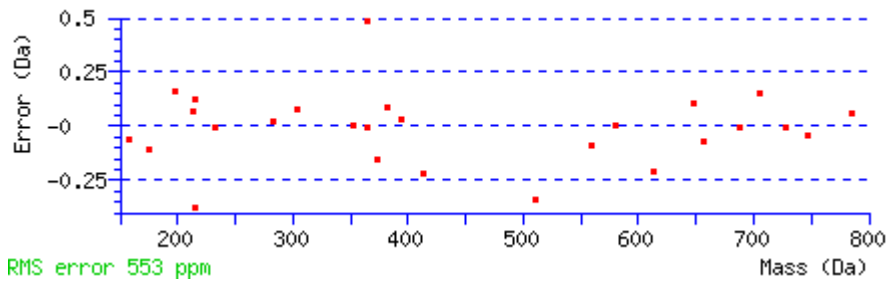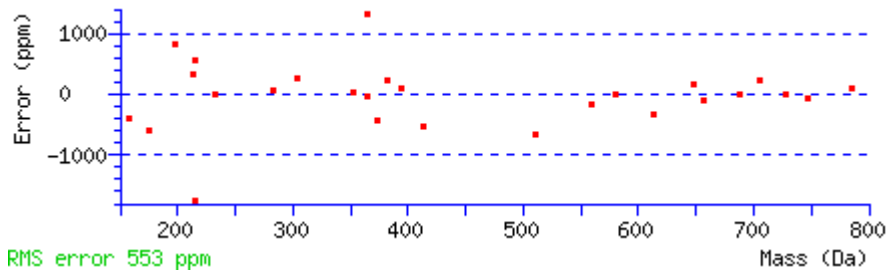



IDENTIFICATION 32

MS/MS Fragmentation of **TSEDTS<sup>SG</sup>SPPKK**

Found in **IPI00399961**

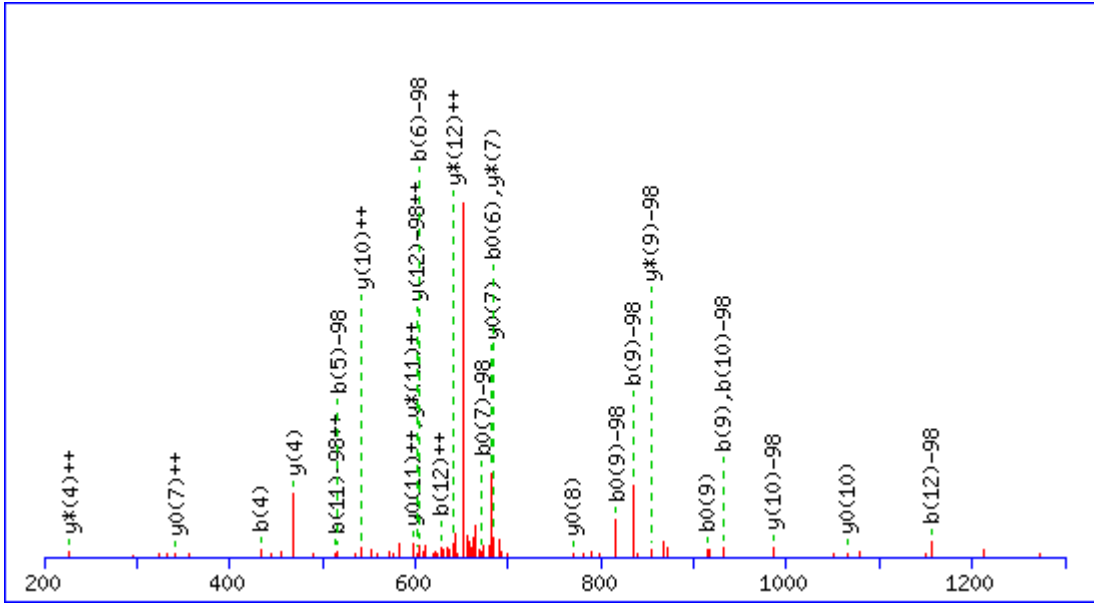

Monoisotopic mass of neutral peptide Mr(calc): 1399.5868

Fixed modifications: Carbamidomethyl (C) (apply to specified residues or termini only)

Variable modifications:

T5 : Phospho (ST), with neutral losses 97.9769 (shown in table), 0.0000

Ions Score: 26 Expect: 0.25 (help)

| #  | b         | b <sup>++</sup> | b <sup>*</sup> | b <sup>+++</sup> | b <sup>0</sup> | b <sup>0++</sup> | Seq. | y         | y <sup>++</sup> | y <sup>*</sup> | y <sup>+++</sup> | y <sup>0</sup> | y <sup>0++</sup> | #  |
|----|-----------|-----------------|----------------|------------------|----------------|------------------|------|-----------|-----------------|----------------|------------------|----------------|------------------|----|
| 1  | 102.0550  | 51.5311         |                |                  | 84.0444        | 42.5258          | T    |           |                 |                |                  |                |                  | 13 |
| 2  | 189.0870  | 95.0471         |                |                  | 171.0764       | 86.0418          | S    | 1201.5695 | 601.2884        | 1184.5430      | 592.7751         | 1183.5590      | 592.2831         | 12 |
| 3  | 318.1296  | 159.5684        |                |                  | 300.1190       | 150.5631         | E    | 1114.5375 | 557.7724        | 1097.5109      | 549.2591         | 1096.5269      | 548.7671         | 11 |
| 4  | 433.1565  | 217.0819        |                |                  | 415.1460       | 208.0766         | D    | 985.4949  | 493.2511        | 968.4684       | 484.7378         | 967.4843       | 484.2458         | 10 |
| 5  | 516.1936  | 258.6005        |                |                  | 498.1831       | 249.5952         | T    | 870.4680  | 435.7376        | 853.4414       | 427.2243         | 852.4574       | 426.7323         | 9  |
| 6  | 603.2257  | 302.1165        |                |                  | 585.2151       | 293.1112         | S    | 787.4308  | 394.2191        | 770.4043       | 385.7058         | 769.4203       | 385.2138         | 8  |
| 7  | 690.2577  | 345.6325        |                |                  | 672.2471       | 336.6272         | S    | 700.3988  | 350.7030        | 683.3723       | 342.1898         | 682.3883       | 341.6978         | 7  |
| 8  | 747.2792  | 374.1432        |                |                  | 729.2686       | 365.1379         | G    | 613.3668  | 307.1870        | 596.3402       | 298.6738         | 595.3562       | 298.1817         | 6  |
| 9  | 834.3112  | 417.6592        |                |                  | 816.3006       | 408.6539         | S    | 556.3453  | 278.6763        | 539.3188       | 270.1630         | 538.3348       | 269.6710         | 5  |
| 10 | 931.3639  | 466.1856        |                |                  | 913.3534       | 457.1803         | P    | 469.3133  | 235.1603        | 452.2867       | 226.6470         |                |                  | 4  |
| 11 | 1028.4167 | 514.7120        |                |                  | 1010.4061      | 505.7067         | P    | 372.2605  | 186.6339        | 355.2340       | 178.1206         |                |                  | 3  |
| 12 | 1156.5117 | 578.7595        | 1139.4851      | 570.2462         | 1138.5011      | 569.7542         | K    | 275.2078  | 138.1075        | 258.1812       | 129.5942         |                |                  | 2  |
| 13 |           |                 |                |                  |                |                  | K    | 147.1128  | 74.0600         | 130.0863       | 65.5468          |                |                  | 1  |

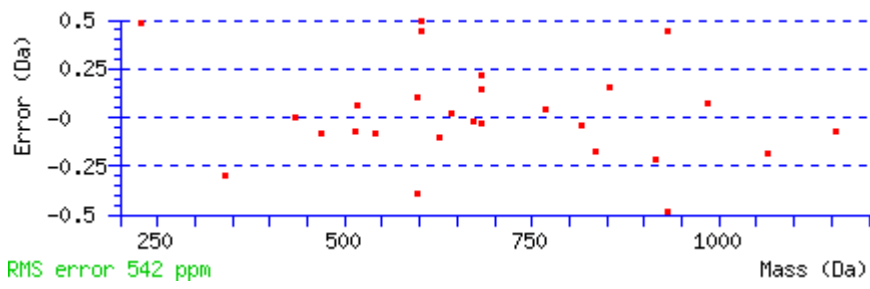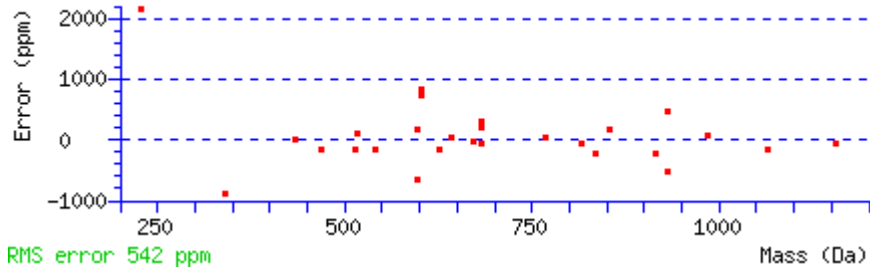

IDENTIFICATION 33

MS/MS Fragmentation of **KAEGERQESPLK**

Found in **IPI00169477**

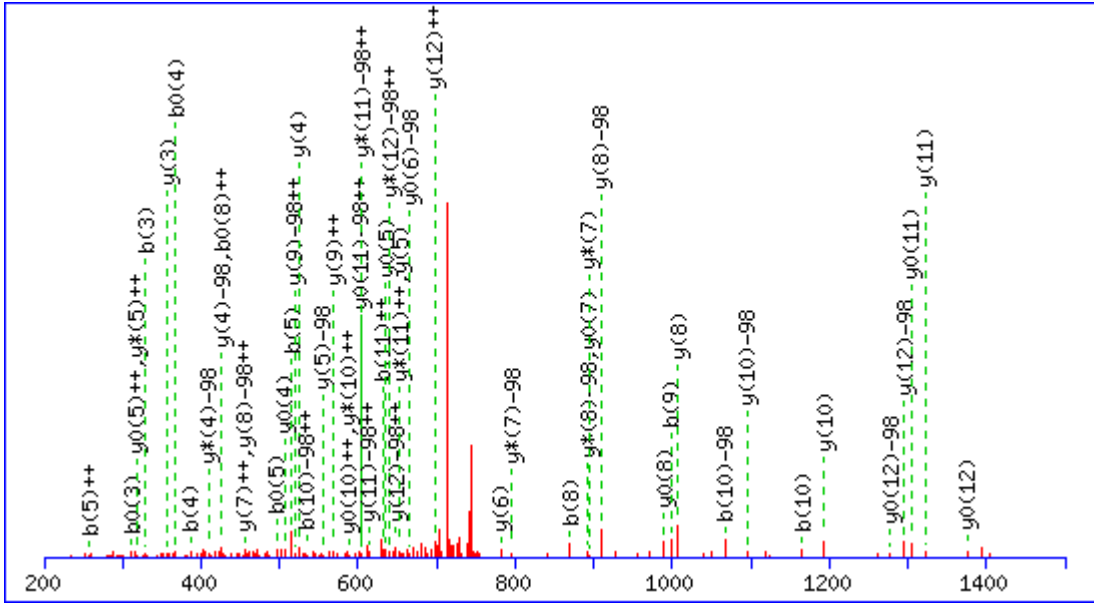

Monoisotopic mass of neutral peptide Mr(calc): 1520.6759

Fixed modifications: Carbamidomethyl (C) (apply to specified residues or termini only)

Variable modifications:

S10 : Phospho (ST), with neutral losses 0.0000(shown in table), 97.9769

Ions Score: 27 Expect: 0.26 (help)

| #  | b         | b <sup>++</sup> | b <sup>*</sup> | b <sup>+++</sup> | b <sup>0</sup> | b <sup>0++</sup> | Seq. | y         | y <sup>++</sup> | y <sup>*</sup> | y <sup>+++</sup> | y <sup>0</sup> | y <sup>0++</sup> | #  |
|----|-----------|-----------------|----------------|------------------|----------------|------------------|------|-----------|-----------------|----------------|------------------|----------------|------------------|----|
| 1  | 129.1022  | 65.0548         | 112.0757       | 56.5415          |                |                  | K    |           |                 |                |                  |                |                  | 13 |
| 2  | 200.1394  | 100.5733        | 183.1128       | 92.0600          |                |                  | A    | 1393.5883 | 697.2978        | 1376.5617      | 688.7845         | 1375.5777      | 688.2925         | 12 |
| 3  | 329.1819  | 165.0946        | 312.1554       | 156.5813         | 311.1714       | 156.0893         | E    | 1322.5512 | 661.7792        | 1305.5246      | 653.2659         | 1304.5406      | 652.7739         | 11 |
| 4  | 386.2034  | 193.6053        | 369.1769       | 185.0921         | 368.1928       | 184.6001         | G    | 1193.5086 | 597.2579        | 1176.4820      | 588.7447         | 1175.4980      | 588.2526         | 10 |
| 5  | 515.2460  | 258.1266        | 498.2195       | 249.6134         | 497.2354       | 249.1214         | E    | 1136.4871 | 568.7472        | 1119.4606      | 560.2339         | 1118.4765      | 559.7419         | 9  |
| 6  | 612.2988  | 306.6530        | 595.2722       | 298.1397         | 594.2882       | 297.6477         | P    | 1007.4445 | 504.2259        | 990.4180       | 495.7126         | 989.4340       | 495.2206         | 8  |
| 7  | 740.3573  | 370.6823        | 723.3308       | 362.1690         | 722.3468       | 361.6770         | Q    | 910.3918  | 455.6995        | 893.3652       | 447.1862         | 892.3812       | 446.6942         | 7  |
| 8  | 869.3999  | 435.2036        | 852.3734       | 426.6903         | 851.3894       | 426.1983         | E    | 782.3332  | 391.6702        | 765.3066       | 383.1570         | 764.3226       | 382.6649         | 6  |
| 9  | 998.4425  | 499.7249        | 981.4160       | 491.2116         | 980.4320       | 490.7196         | E    | 653.2906  | 327.1489        | 636.2640       | 318.6357         | 635.2800       | 318.1436         | 5  |
| 10 | 1165.4409 | 583.2241        | 1148.4143      | 574.7108         | 1147.4303      | 574.2188         | S    | 524.2480  | 262.6276        | 507.2214       | 254.1144         | 506.2374       | 253.6224         | 4  |
| 11 | 1262.4937 | 631.7505        | 1245.4671      | 623.2372         | 1244.4831      | 622.7452         | P    | 357.2496  | 179.1285        | 340.2231       | 170.6152         |                |                  | 3  |
| 12 | 1375.5777 | 688.2925        | 1358.5512      | 679.7792         | 1357.5672      | 679.2872         | L    | 260.1969  | 130.6021        | 243.1703       | 122.0888         |                |                  | 2  |
| 13 |           |                 |                |                  |                |                  | K    | 147.1128  | 74.0600         | 130.0863       | 65.5468          |                |                  | 1  |

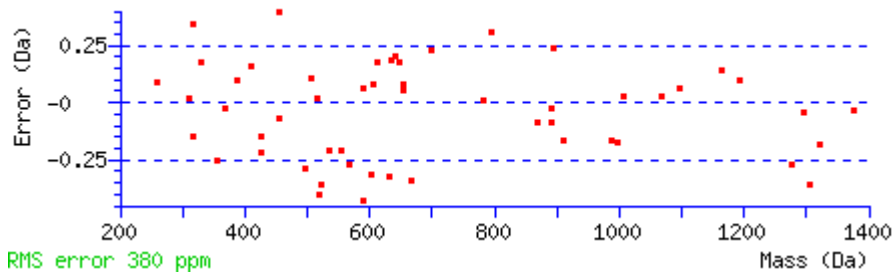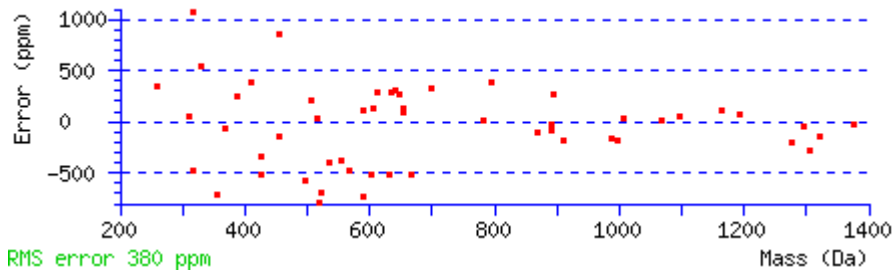

IDENTIFICATION 34

MS/MS Fragmentation of AGDVLEDSPKRPK

Found in IPI00313817

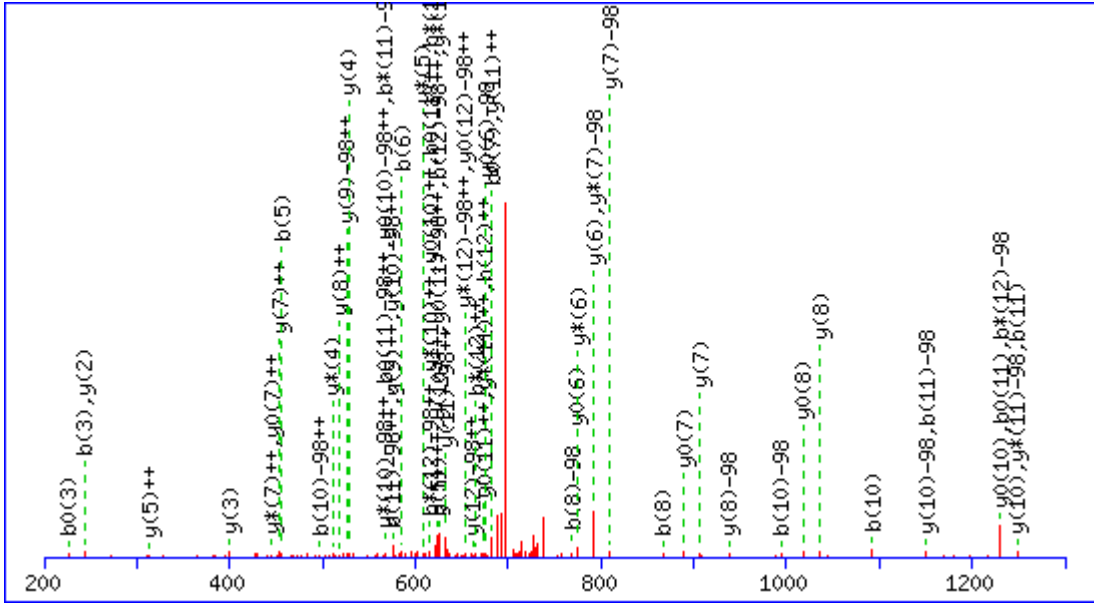

Monoisotopic mass of neutral peptide Mr(calc): 1490.7130

Fixed modifications: Carbamidomethyl (C) (apply to specified residues or termini only)

Variable modifications:

S8 : Phospho (ST), with neutral losses 0.0000(shown in table), 97.9769

Ions Score: 47 Expect: 0.0024 (help)

| #  | b         | b <sup>++</sup> | b <sup>*</sup> | b <sup>+++</sup> | b <sup>0</sup> | b <sup>0++</sup> | Seq. | y         | y <sup>++</sup> | y <sup>*</sup> | y <sup>+++</sup> | y <sup>0</sup> | y <sup>0++</sup> | #  |
|----|-----------|-----------------|----------------|------------------|----------------|------------------|------|-----------|-----------------|----------------|------------------|----------------|------------------|----|
| 1  | 72.0444   | 36.5258         |                |                  |                |                  | A    |           |                 |                |                  |                |                  | 13 |
| 2  | 129.0659  | 65.0366         |                |                  |                |                  | G    | 1420.6832 | 710.8452        | 1403.6566      | 702.3320         | 1402.6726      | 701.8399         | 12 |
| 3  | 244.0928  | 122.5500        |                |                  | 226.0822       | 113.5448         | D    | 1363.6617 | 682.3345        | 1346.6352      | 673.8212         | 1345.6512      | 673.3292         | 11 |
| 4  | 343.1612  | 172.0842        |                |                  | 325.1506       | 163.0790         | V    | 1248.6348 | 624.8210        | 1231.6082      | 616.3078         | 1230.6242      | 615.8157         | 10 |
| 5  | 456.2453  | 228.6263        |                |                  | 438.2347       | 219.6210         | L    | 1149.5664 | 575.2868        | 1132.5398      | 566.7735         | 1131.5558      | 566.2815         | 9  |
| 6  | 585.2879  | 293.1476        |                |                  | 567.2773       | 284.1423         | E    | 1036.4823 | 518.7448        | 1019.4558      | 510.2315         | 1018.4717      | 509.7395         | 8  |
| 7  | 700.3148  | 350.6610        |                |                  | 682.3042       | 341.6558         | D    | 907.4397  | 454.2235        | 890.4132       | 445.7102         | 889.4291       | 445.2182         | 7  |
| 8  | 867.3132  | 434.1602        |                |                  | 849.3026       | 425.1549         | S    | 792.4128  | 396.7100        | 775.3862       | 388.1967         | 774.4022       | 387.7047         | 6  |
| 9  | 964.3659  | 482.6866        |                |                  | 946.3554       | 473.6813         | P    | 625.4144  | 313.2108        | 608.3879       | 304.6976         |                |                  | 5  |
| 10 | 1092.4609 | 546.7341        | 1075.4343      | 538.2208         | 1074.4503      | 537.7288         | K    | 528.3616  | 264.6845        | 511.3351       | 256.1712         |                |                  | 4  |
| 11 | 1248.5620 | 624.7846        | 1231.5355      | 616.2714         | 1230.5514      | 615.7794         | R    | 400.2667  | 200.6370        | 383.2401       | 192.1237         |                |                  | 3  |
| 12 | 1345.6148 | 673.3110        | 1328.5882      | 664.7977         | 1327.6042      | 664.3057         | P    | 244.1656  | 122.5864        | 227.1390       | 114.0731         |                |                  | 2  |
| 13 |           |                 |                |                  |                |                  | K    | 147.1128  | 74.0600         | 130.0863       | 65.5468          |                |                  | 1  |

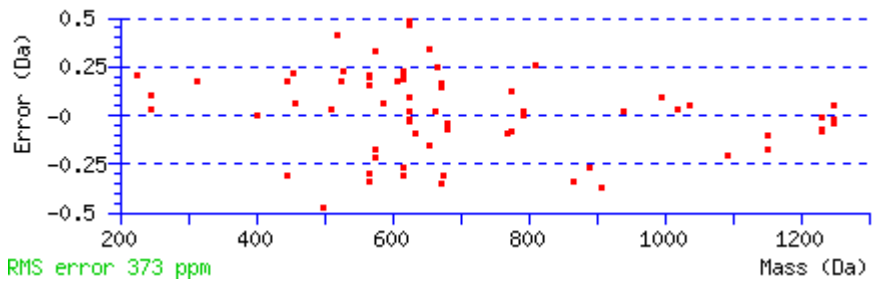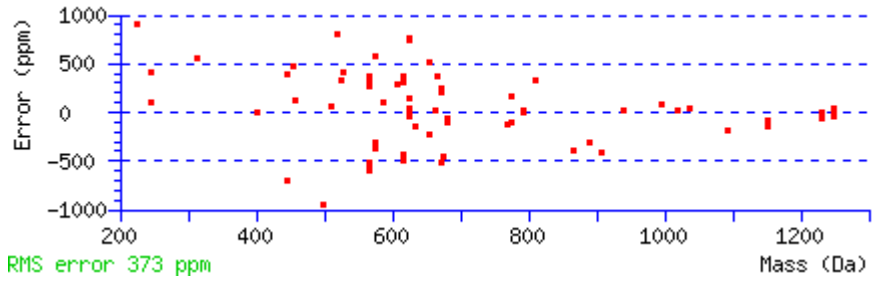

IDENTIFICATION 35

MS/MS Fragmentation of **LSQIQDILLMK**

Found in **IPI00403993**

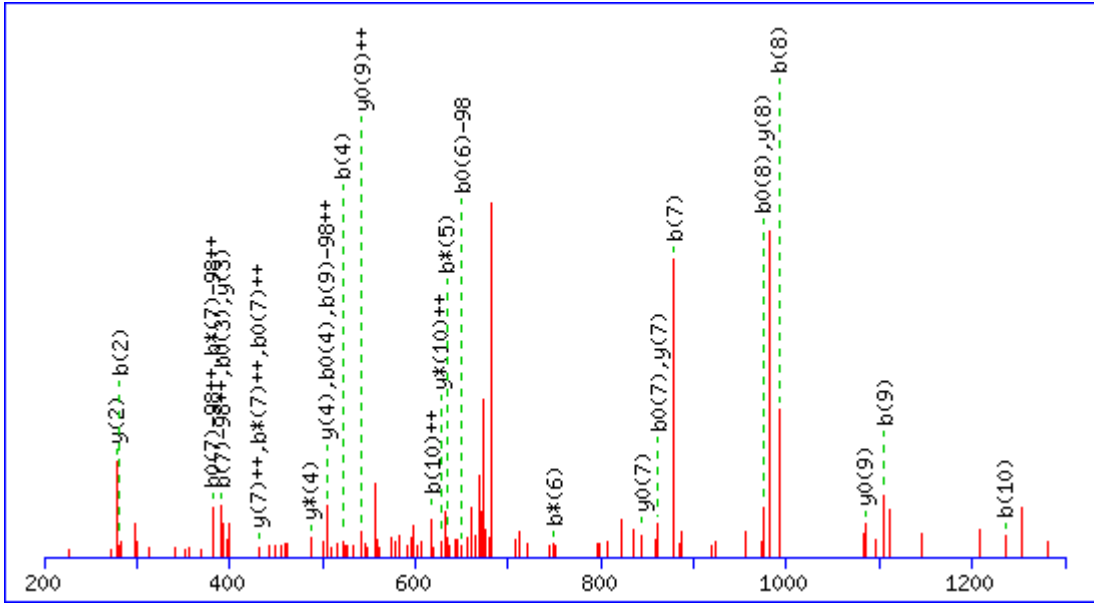

Monoisotopic mass of neutral peptide Mr(calc): 1381.6928

Fixed modifications: Carbamidomethyl (C) (apply to specified residues or termini only)

Variable modifications:

S2 : Phospho (ST), with neutral losses 0.0000(shown in table), 97.9769

Q5 : Deamidated (NQ)

Ions Score: 21 Expect: 0.71 (help)

| #  | b         | b <sup>++</sup> | b <sup>*</sup> | b <sup>+++</sup> | b <sup>0</sup> | b <sup>0++</sup> | Seq. | y         | y <sup>++</sup> | y <sup>*</sup> | y <sup>+++</sup> | y <sup>0</sup> | y <sup>0++</sup> | #  |
|----|-----------|-----------------|----------------|------------------|----------------|------------------|------|-----------|-----------------|----------------|------------------|----------------|------------------|----|
| 1  | 114.0913  | 57.5493         |                |                  |                |                  | L    |           |                 |                |                  |                |                  | 11 |
| 2  | 281.0897  | 141.0485        |                |                  | 263.0791       | 132.0432         | S    | 1269.6160 | 635.3116        | 1252.5895      | 626.7984         | 1251.6055      | 626.3064         | 10 |
| 3  | 409.1483  | 205.0778        | 392.1217       | 196.5645         | 391.1377       | 196.0725         | Q    | 1102.6177 | 551.8125        | 1085.5911      | 543.2992         | 1084.6071      | 542.8072         | 9  |
| 4  | 522.2323  | 261.6198        | 505.2058       | 253.1065         | 504.2218       | 252.6145         | I    | 974.5591  | 487.7832        | 957.5325       | 479.2699         | 956.5485       | 478.7779         | 8  |
| 5  | 651.2749  | 326.1411        | 634.2484       | 317.6278         | 633.2644       | 317.1358         | Q    | 861.4750  | 431.2411        | 844.4485       | 422.7279         | 843.4645       | 422.2359         | 7  |
| 6  | 766.3019  | 383.6546        | 749.2753       | 375.1413         | 748.2913       | 374.6493         | D    | 732.4324  | 366.7199        | 715.4059       | 358.2066         | 714.4219       | 357.7146         | 6  |
| 7  | 879.3859  | 440.1966        | 862.3594       | 431.6833         | 861.3754       | 431.1913         | I    | 617.4055  | 309.2064        | 600.3789       | 300.6931         |                |                  | 5  |
| 8  | 992.4700  | 496.7386        | 975.4435       | 488.2254         | 974.4594       | 487.7334         | L    | 504.3214  | 252.6643        | 487.2949       | 244.1511         |                |                  | 4  |
| 9  | 1105.5541 | 553.2807        | 1088.5275      | 544.7674         | 1087.5435      | 544.2754         | L    | 391.2374  | 196.1223        | 374.2108       | 187.6090         |                |                  | 3  |
| 10 | 1236.5946 | 618.8009        | 1219.5680      | 610.2876         | 1218.5840      | 609.7956         | M    | 278.1533  | 139.5803        | 261.1267       | 131.0670         |                |                  | 2  |
| 11 |           |                 |                |                  |                |                  | K    | 147.1128  | 74.0600         | 130.0863       | 65.5468          |                |                  | 1  |

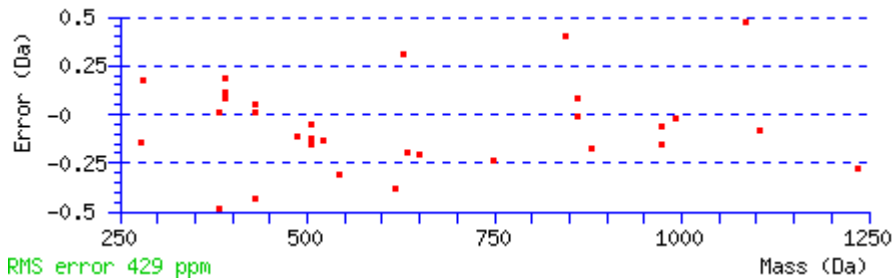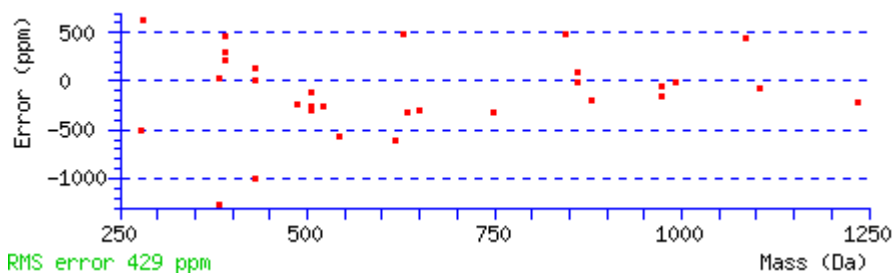

IDENTIFICATION 36

MS/MS Fragmentation of **TTGIVMDSGDGVHTHTVPIYEGYALPHAILR**  
 Found in **IPI00110850**

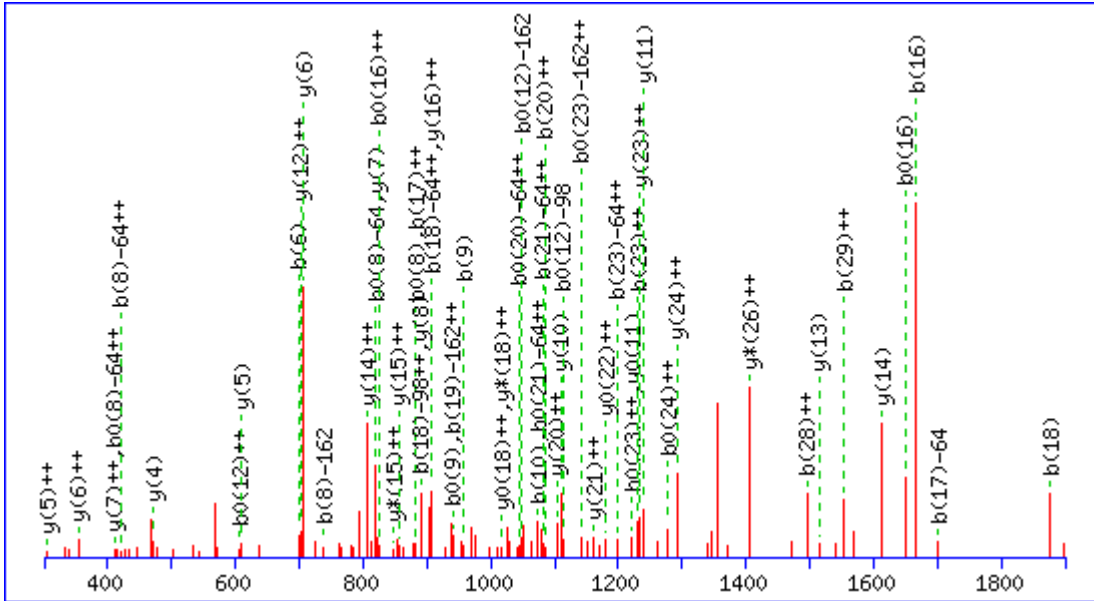

Monoisotopic mass of neutral peptide  $M_r(\text{calc})$ : 3278.5683

Fixed modifications: Carbamidomethyl (C) (apply to specified residues or termini only)

Variable modifications:

T2 : Phospho (ST), with neutral losses 0.0000(shown in table), 97.9769

M6 : Oxidation (M), with neutral losses 0.0000(shown in table), 63.9983

Ions Score: 55 Expect: 0.00038 (help)

| #  | b         | b <sup>++</sup> | b <sup>0</sup> | b <sup>0++</sup> | Seq. | y         | y <sup>++</sup> | y <sup>+</sup> | y <sup>+++</sup> | y <sup>0</sup> | y <sup>0++</sup> | #  |
|----|-----------|-----------------|----------------|------------------|------|-----------|-----------------|----------------|------------------|----------------|------------------|----|
| 1  | 102.0550  | 51.5311         | 84.0444        | 42.5258          | T    |           |                 |                |                  |                |                  | 30 |
| 2  | 283.0690  | 142.0381        | 265.0584       | 133.0328         | T    | 3178.5279 | 1589.7676       | 3161.5013      | 1581.2543        | 3160.5173      | 1580.7623        | 29 |
| 3  | 340.0904  | 170.5489        | 322.0799       | 161.5436         | G    | 2997.5139 | 1499.2606       | 2980.4873      | 1490.7473        | 2979.5033      | 1490.2553        | 28 |
| 4  | 453.1745  | 227.0909        | 435.1639       | 218.0856         | I    | 2940.4924 | 1470.7498       | 2923.4659      | 1462.2366        | 2922.4818      | 1461.7446        | 27 |
| 5  | 552.2429  | 276.6251        | 534.2323       | 267.6198         | V    | 2827.4083 | 1414.2078       | 2810.3818      | 1405.6945        | 2809.3978      | 1405.2025        | 26 |
| 6  | 699.2783  | 350.1428        | 681.2677       | 341.1375         | M    | 2728.3399 | 1364.6736       | 2711.3134      | 1356.1603        | 2710.3294      | 1355.6683        | 25 |
| 7  | 814.3053  | 407.6563        | 796.2947       | 398.6510         | D    | 2581.3045 | 1291.1559       | 2564.2780      | 1282.6426        | 2563.2940      | 1282.1506        | 24 |
| 8  | 901.3373  | 451.1723        | 883.3267       | 442.1670         | S    | 2466.2776 | 1233.6424       | 2449.2510      | 1225.1292        | 2448.2670      | 1224.6371        | 23 |
| 9  | 958.3587  | 479.6830        | 940.3482       | 470.6777         | G    | 2379.2456 | 1190.1264       | 2362.2190      | 1181.6131        | 2361.2350      | 1181.1211        | 22 |
| 10 | 1073.3857 | 537.1965        | 1055.3751      | 528.1912         | D    | 2322.2241 | 1161.6157       | 2305.1975      | 1153.1024        | 2304.2135      | 1152.6104        | 21 |
| 11 | 1130.4071 | 565.7072        | 1112.3966      | 556.7019         | G    | 2207.1972 | 1104.1022       | 2190.1706      | 1095.5889        | 2189.1866      | 1095.0969        | 20 |
| 12 | 1229.4756 | 615.2414        | 1211.4650      | 606.2361         | V    | 2150.1757 | 1075.5915       | 2133.1491      | 1067.0782        | 2132.1651      | 1066.5862        | 19 |
| 13 | 1330.5232 | 665.7653        | 1312.5127      | 656.7600         | T    | 2051.1073 | 1026.0573       | 2034.0807      | 1017.5440        | 2033.0967      | 1017.0520        | 18 |
| 14 | 1467.5822 | 734.2947        | 1449.5716      | 725.2894         | H    | 1950.0596 | 975.5334        | 1933.0330      | 967.0202         | 1932.0490      | 966.5282         | 17 |
| 15 | 1568.6298 | 784.8186        | 1550.6193      | 775.8133         | T    | 1813.0007 | 907.0040        | 1795.9741      | 898.4907         | 1794.9901      | 897.9987         | 16 |
| 16 | 1667.6982 | 834.3528        | 1649.6877      | 825.3475         | V    | 1711.9530 | 856.4801        | 1694.9265      | 847.9669         | 1693.9424      | 847.4749         | 15 |
| 17 | 1764.7510 | 882.8791        | 1746.7404      | 873.8739         | P    | 1612.8846 | 806.9459        | 1595.8580      | 798.4327         | 1594.8740      | 797.9407         | 14 |
| 18 | 1877.8351 | 939.4212        | 1859.8245      | 930.4159         | I    | 1515.8318 | 758.4196        | 1498.8053      | 749.9063         | 1497.8213      | 749.4143         | 13 |
| 19 | 2040.8984 | 1020.9528       | 2022.8878      | 1011.9476        | Y    | 1402.7478 | 701.8775        | 1385.7212      | 693.3642         | 1384.7372      | 692.8722         | 12 |
| 20 | 2169.9410 | 1085.4741       | 2151.9304      | 1076.4689        | E    | 1239.6844 | 620.3459        | 1222.6579      | 611.8326         | 1221.6739      | 611.3406         | 11 |
| 21 | 2226.9625 | 1113.9849       | 2208.9519      | 1104.9796        | G    | 1110.6418 | 555.8246        | 1093.6153      | 547.3113         |                |                  | 10 |
| 22 | 2390.0258 | 1195.5165       | 2372.0152      | 1186.5113        | Y    | 1053.6204 | 527.3138        | 1036.5938      | 518.8006         |                |                  | 9  |
| 23 | 2461.0629 | 1231.0351       | 2443.0523      | 1222.0298        | A    | 890.5570  | 445.7822        | 873.5305       | 437.2689         |                |                  | 8  |
| 24 | 2574.1470 | 1287.5771       | 2556.1364      | 1278.5718        | L    | 819.5199  | 410.2636        | 802.4934       | 401.7503         |                |                  | 7  |
| 25 | 2671.1997 | 1336.1035       | 2653.1892      | 1327.0982        | P    | 706.4359  | 353.7216        | 689.4093       | 345.2083         |                |                  | 6  |
| 26 | 2808.2586 | 1404.6330       | 2790.2481      | 1395.6277        | H    | 609.3831  | 305.1952        | 592.3566       | 296.6819         |                |                  | 5  |



|    |           |           |           |           |   |          |          |          |          |  |  |   |
|----|-----------|-----------|-----------|-----------|---|----------|----------|----------|----------|--|--|---|
| 27 | 2879.2958 | 1440.1515 | 2861.2852 | 1431.1462 | A | 472.3242 | 236.6657 | 455.2976 | 228.1525 |  |  | 4 |
| 28 | 2992.3798 | 1496.6935 | 2974.3693 | 1487.6883 | I | 401.2871 | 201.1472 | 384.2605 | 192.6339 |  |  | 3 |
| 29 | 3105.4639 | 1553.2356 | 3087.4533 | 1544.2303 | L | 288.2030 | 144.6051 | 271.1765 | 136.0919 |  |  | 2 |
| 30 |           |           |           |           | R | 175.1190 | 88.0631  | 158.0924 | 79.5498  |  |  | 1 |

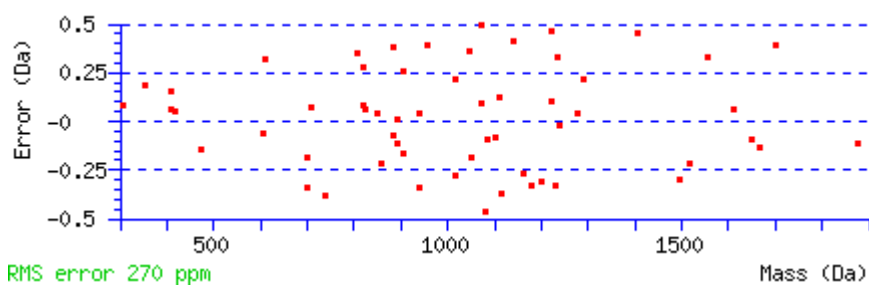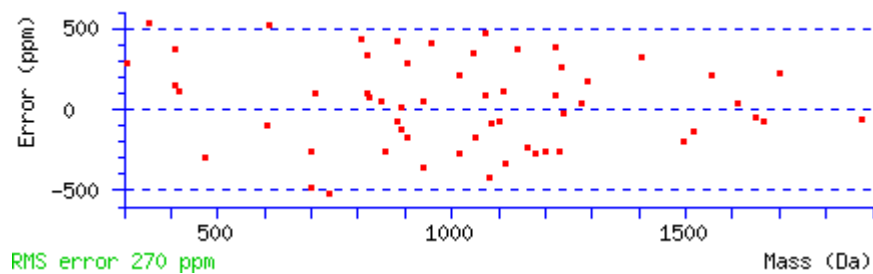

IDENTIFICATION 37

MS/MS Fragmentation of **KASPEPEGETAGK**

Found in **IPI00453578**

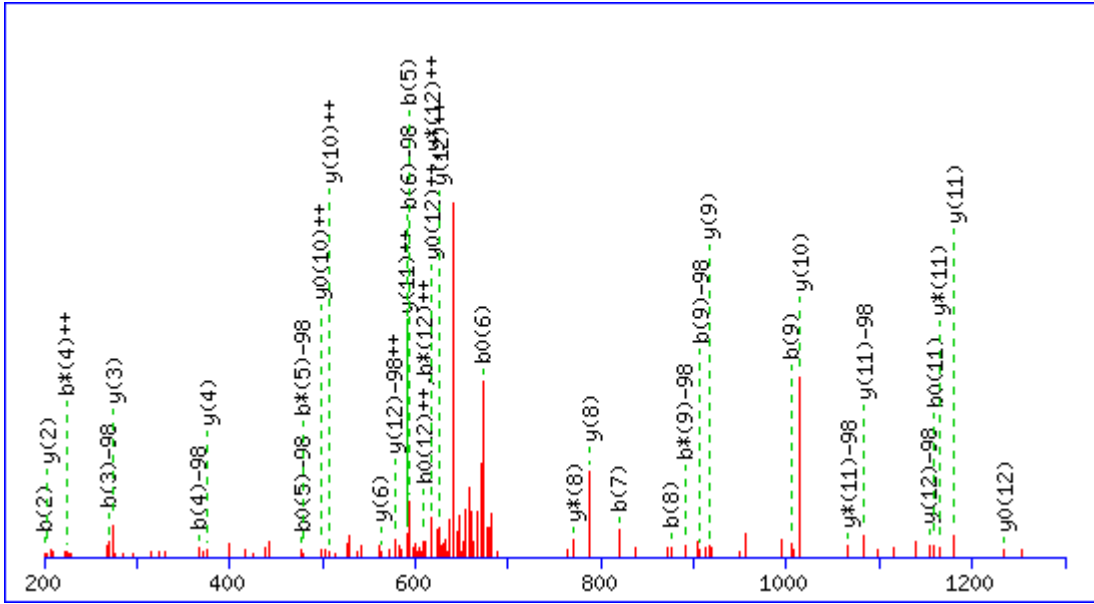

Monoisotopic mass of neutral peptide  $M_r(\text{calc})$ : 1379.5970

Fixed modifications: Carbamidomethyl (C) (apply to specified residues or termini only)

Variable modifications:

S3 : Phospho (ST), with neutral losses 97.9769 (shown in table), 0.0000

Ions Score: 35 Expect: 0.035 (help)

| #  | b         | b <sup>++</sup> | b <sup>*</sup> | b <sup>+</sup> <sub>++</sub> | b <sup>0</sup> | b <sup>0++</sup> | Seq. | y         | y <sup>++</sup> | y <sup>*</sup> | y <sup>+++</sup> | y <sup>0</sup> | y <sub>0++</sub> | #  |
|----|-----------|-----------------|----------------|------------------------------|----------------|------------------|------|-----------|-----------------|----------------|------------------|----------------|------------------|----|
| 1  | 129.1022  | 65.0548         | 112.0757       | 56.5415                      |                |                  | K    |           |                 |                |                  |                |                  | 13 |
| 2  | 200.1394  | 100.5733        | 183.1128       | 92.0600                      |                |                  | A    | 1154.5324 | 577.7698        | 1137.5059      | 569.2566         | 1136.5218      | 568.7646         | 12 |
| 3  | 269.1608  | 135.0840        | 252.1343       | 126.5708                     | 251.1503       | 126.0788         | S    | 1083.4953 | 542.2513        | 1066.4687      | 533.7380         | 1065.4847      | 533.2460         | 11 |
| 4  | 366.2136  | 183.6104        | 349.1870       | 175.0972                     | 348.2030       | 174.6051         | P    | 1014.4738 | 507.7406        | 997.4473       | 499.2273         | 996.4633       | 498.7353         | 10 |
| 5  | 495.2562  | 248.1317        | 478.2296       | 239.6185                     | 477.2456       | 239.1264         | E    | 917.4211  | 459.2142        | 900.3945       | 450.7009         | 899.4105       | 450.2089         | 9  |
| 6  | 592.3089  | 296.6581        | 575.2824       | 288.1448                     | 574.2984       | 287.6528         | P    | 788.3785  | 394.6929        | 771.3519       | 386.1796         | 770.3679       | 385.6876         | 8  |
| 7  | 721.3515  | 361.1794        | 704.3250       | 352.6661                     | 703.3410       | 352.1741         | E    | 691.3257  | 346.1665        | 674.2992       | 337.6532         | 673.3151       | 337.1612         | 7  |
| 8  | 778.3730  | 389.6901        | 761.3464       | 381.1769                     | 760.3624       | 380.6849         | G    | 562.2831  | 281.6452        | 545.2566       | 273.1319         | 544.2726       | 272.6399         | 6  |
| 9  | 907.4156  | 454.2114        | 890.3890       | 445.6982                     | 889.4050       | 445.2061         | E    | 505.2617  | 253.1345        | 488.2351       | 244.6212         | 487.2511       | 244.1292         | 5  |
| 10 | 1008.4633 | 504.7353        | 991.4367       | 496.2220                     | 990.4527       | 495.7300         | T    | 376.2191  | 188.6132        | 359.1925       | 180.0999         | 358.2085       | 179.6079         | 4  |
| 11 | 1079.5004 | 540.2538        | 1062.4738      | 531.7406                     | 1061.4898      | 531.2485         | A    | 275.1714  | 138.0893        | 258.1448       | 129.5761         |                |                  | 3  |
| 12 | 1136.5218 | 568.7646        | 1119.4953      | 560.2513                     | 1118.5113      | 559.7593         | G    | 204.1343  | 102.5708        | 187.1077       | 94.0575          |                |                  | 2  |
| 13 |           |                 |                |                              |                |                  | K    | 147.1128  | 74.0600         | 130.0863       | 65.5468          |                |                  | 1  |

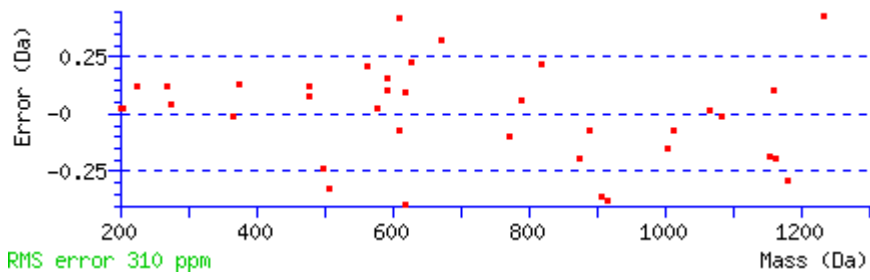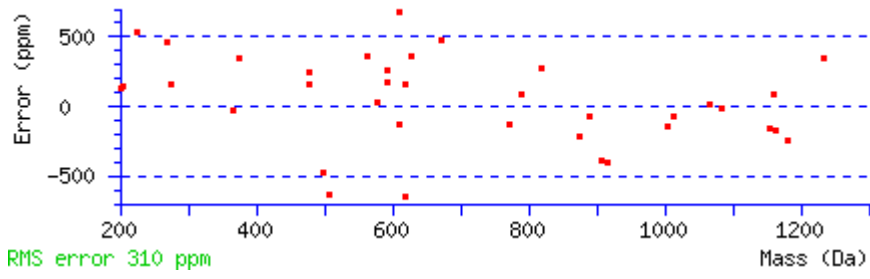

IDENTIFICATION 38

MS/MS Fragmentation of **TRLSPPR**

Found in **IPI00404707**

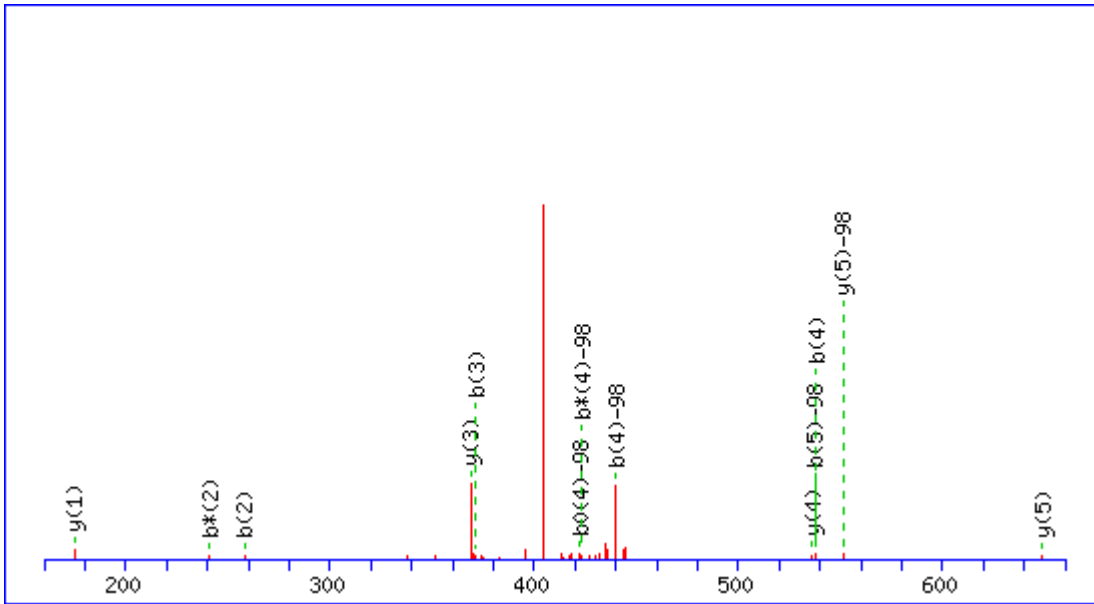

Monoisotopic mass of neutral peptide  $M_r(\text{calc})$ : 905.4484

Fixed modifications: Carbamidomethyl (C) (apply to specified residues or termini only)

Variable modifications:

S4 : Phospho (ST), with neutral losses 97.9769 (shown in table), 0.0000

Ions Score: 32 Expect: 0.043 (help)

| # | b        | b <sup>++</sup> | b <sup>*</sup> | b <sup>+++</sup> | b <sup>0</sup> | b <sup>0++</sup> | Seq. | y        | y <sup>++</sup> | y <sup>*</sup> | y <sup>+++</sup> | y <sup>0</sup> | y <sup>0++</sup> | # |
|---|----------|-----------------|----------------|------------------|----------------|------------------|------|----------|-----------------|----------------|------------------|----------------|------------------|---|
| 1 | 102.0550 | 51.5311         |                |                  | 84.0444        | 42.5258          | T    |          |                 |                |                  |                |                  | 7 |
| 2 | 258.1561 | 129.5817        | 241.1295       | 121.0684         | 240.1455       | 120.5764         | R    | 707.4311 | 354.2192        | 690.4046       | 345.7059         | 689.4206       | 345.2139         | 6 |
| 3 | 371.2401 | 186.1237        | 354.2136       | 177.6104         | 353.2296       | 177.1184         | L    | 551.3300 | 276.1686        | 534.3035       | 267.6554         | 533.3194       | 267.1634         | 5 |
| 4 | 440.2616 | 220.6344        | 423.2350       | 212.1212         | 422.2510       | 211.6292         | S    | 438.2459 | 219.6266        | 421.2194       | 211.1133         | 420.2354       | 210.6213         | 4 |
| 5 | 537.3144 | 269.1608        | 520.2878       | 260.6475         | 519.3038       | 260.1555         | P    | 369.2245 | 185.1159        | 352.1979       | 176.6026         |                |                  | 3 |
| 6 | 634.3671 | 317.6872        | 617.3406       | 309.1739         | 616.3566       | 308.6819         | P    | 272.1717 | 136.5895        | 255.1452       | 128.0762         |                |                  | 2 |
| 7 |          |                 |                |                  |                |                  | R    | 175.1190 | 88.0631         | 158.0924       | 79.5498          |                |                  | 1 |

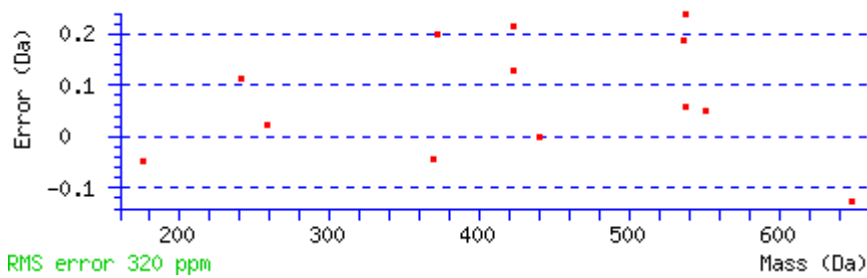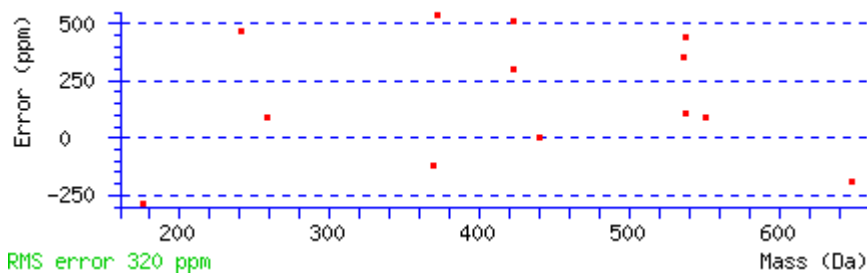

IDENTIFICATION 39

MS/MS Fragmentation of EGEEPTVYSDDEEPKDETAR

Found in IPI00319973

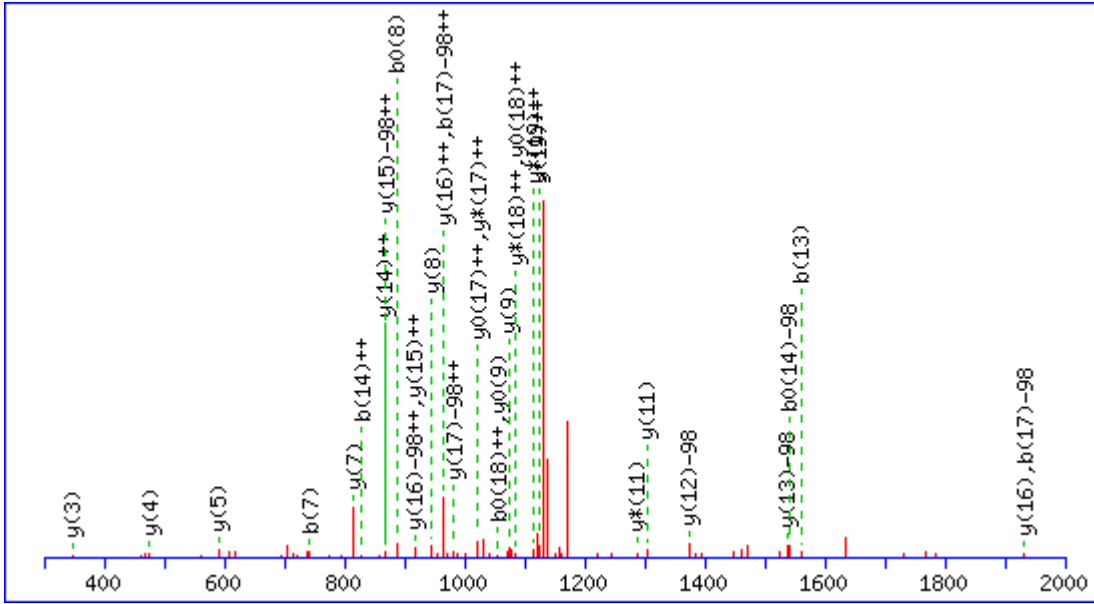

Monoisotopic mass of neutral peptide Mr(calc): 2374.9326

Fixed modifications: Carbamidomethyl (C) (apply to specified residues or termini only)

Variable modifications:

S9 : Phospho (ST), with neutral losses 97.9769 (shown in table), 0.0000

Ions Score: 41 Expect: 0.015 (help)

| #  | b         | b <sup>++</sup> | b <sup>*</sup> | b <sup>+++</sup> | b <sup>0</sup> | b <sup>0++</sup> | Seq. | y         | y <sup>++</sup> | y <sup>*</sup> | y <sup>+++</sup> | y <sup>0</sup> | y <sup>0++</sup> | #  |
|----|-----------|-----------------|----------------|------------------|----------------|------------------|------|-----------|-----------------|----------------|------------------|----------------|------------------|----|
| 1  | 130.0499  | 65.5286         |                |                  | 112.0393       | 56.5233          | E    |           |                 |                |                  |                |                  | 20 |
| 2  | 187.0713  | 94.0393         |                |                  | 169.0608       | 85.0340          | G    | 2148.9204 | 1074.9638       | 2131.8938      | 1066.4506        | 2130.9098      | 1065.9585        | 19 |
| 3  | 316.1139  | 158.5606        |                |                  | 298.1034       | 149.5553         | E    | 2091.8989 | 1046.4531       | 2074.8724      | 1037.9398        | 2073.8883      | 1037.4478        | 18 |
| 4  | 445.1565  | 223.0819        |                |                  | 427.1460       | 214.0766         | E    | 1962.8563 | 981.9318        | 1945.8298      | 973.4185         | 1944.8458      | 972.9265         | 17 |
| 5  | 542.2093  | 271.6083        |                |                  | 524.1987       | 262.6030         | P    | 1833.8137 | 917.4105        | 1816.7872      | 908.8972         | 1815.8032      | 908.4052         | 16 |
| 6  | 643.2570  | 322.1321        |                |                  | 625.2464       | 313.1268         | T    | 1736.7610 | 868.8841        | 1719.7344      | 860.3708         | 1718.7504      | 859.8788         | 15 |
| 7  | 742.3254  | 371.6663        |                |                  | 724.3148       | 362.6610         | V    | 1635.7133 | 818.3603        | 1618.6867      | 809.8470         | 1617.7027      | 809.3550         | 14 |
| 8  | 905.3887  | 453.1980        |                |                  | 887.3781       | 444.1927         | Y    | 1536.6449 | 768.8261        | 1519.6183      | 760.3128         | 1518.6343      | 759.8208         | 13 |
| 9  | 974.4102  | 487.7087        |                |                  | 956.3996       | 478.7034         | S    | 1373.5815 | 687.2944        | 1356.5550      | 678.7811         | 1355.5710      | 678.2891         | 12 |
| 10 | 1089.4371 | 545.2222        |                |                  | 1071.4265      | 536.2169         | D    | 1304.5601 | 652.7837        | 1287.5335      | 644.2704         | 1286.5495      | 643.7784         | 11 |
| 11 | 1204.4641 | 602.7357        |                |                  | 1186.4535      | 593.7304         | D    | 1189.5331 | 595.2702        | 1172.5066      | 586.7569         | 1171.5226      | 586.2649         | 10 |
| 12 | 1333.5066 | 667.2570        |                |                  | 1315.4961      | 658.2517         | E    | 1074.5062 | 537.7567        | 1057.4796      | 529.2435         | 1056.4956      | 528.7515         | 9  |
| 13 | 1462.5492 | 731.7783        |                |                  | 1444.5387      | 722.7730         | E    | 945.4636  | 473.2354        | 928.4371       | 464.7222         | 927.4530       | 464.2302         | 8  |
| 14 | 1559.6020 | 780.3046        |                |                  | 1541.5914      | 771.2994         | P    | 816.4210  | 408.7141        | 799.3945       | 400.2009         | 798.4104       | 399.7089         | 7  |
| 15 | 1687.6970 | 844.3521        | 1670.6704      | 835.8388         | 1669.6864      | 835.3468         | K    | 719.3682  | 360.1878        | 702.3417       | 351.6745         | 701.3577       | 351.1825         | 6  |
| 16 | 1802.7239 | 901.8656        | 1785.6974      | 893.3523         | 1784.7133      | 892.8603         | D    | 591.2733  | 296.1403        | 574.2467       | 287.6270         | 573.2627       | 287.1350         | 5  |
| 17 | 1931.7665 | 966.3869        | 1914.7400      | 957.8736         | 1913.7559      | 957.3816         | E    | 476.2463  | 238.6268        | 459.2198       | 230.1135         | 458.2358       | 229.6215         | 4  |
| 18 | 2032.8142 | 1016.9107       | 2015.7876      | 1008.3975        | 2014.8036      | 1007.9054        | T    | 347.2037  | 174.1055        | 330.1772       | 165.5922         | 329.1932       | 165.1002         | 3  |
| 19 | 2103.8513 | 1052.4293       | 2086.8247      | 1043.9160        | 2085.8407      | 1043.4240        | A    | 246.1561  | 123.5817        | 229.1295       | 115.0684         |                |                  | 2  |
| 20 |           |                 |                |                  |                |                  | R    | 175.1190  | 88.0631         | 158.0924       | 79.5498          |                |                  | 1  |

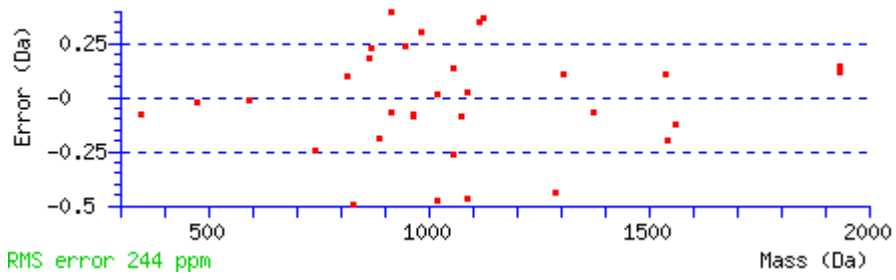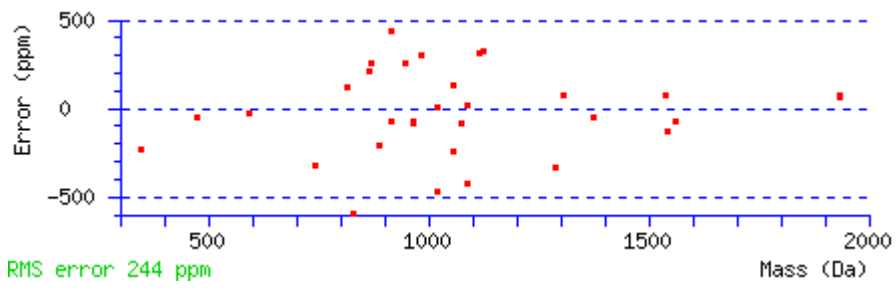

MS/MS Fragmentation of **IDDRDSEEEGPSNQR**  
Found in **IPI00474721**

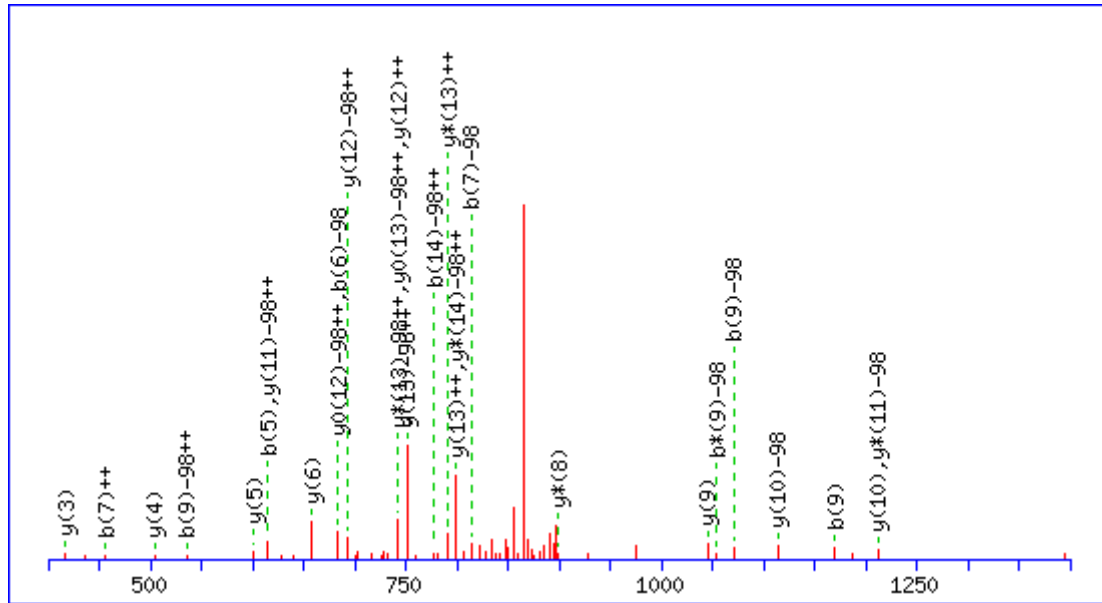

Monoisotopic mass of neutral peptide Mr(calc): 1825.7115 Fixed modifications: Carbamidomethyl (C) (apply to specified residues or termini only) Variable modifications: S6 : Phospho (ST), with neutral losses 97.9769 (shown in table), 0.0000 Ions Score: 43 Expect: 0.0067 (help)

| #  | b         | b <sup>++</sup> | b <sup>*</sup> | b <sup>+++</sup> | b <sup>0</sup> | b <sup>0++</sup> | Seq. | y         | y <sup>++</sup> | y <sup>*</sup> | y <sup>+++</sup> | y <sup>0</sup> | y <sup>0++</sup> | #  |
|----|-----------|-----------------|----------------|------------------|----------------|------------------|------|-----------|-----------------|----------------|------------------|----------------|------------------|----|
| 1  | 114.0913  | 57.5493         |                |                  |                |                  | I    |           |                 |                |                  |                |                  | 15 |
| 2  | 229.1183  | 115.0628        |                |                  | 211.1077       | 106.0575         | D    | 1615.6579 | 808.3326        | 1598.6313      | 799.8193         | 1597.6473      | 799.3273         | 14 |
| 3  | 344.1452  | 172.5763        |                |                  | 326.1347       | 163.5710         | D    | 1500.6310 | 750.8191        | 1483.6044      | 742.3058         | 1482.6204      | 741.8138         | 13 |
| 4  | 500.2463  | 250.6268        | 483.2198       | 242.1135         | 482.2358       | 241.6215         | R    | 1385.6040 | 693.3056        | 1368.5775      | 684.7924         | 1367.5934      | 684.3004         | 12 |
| 5  | 615.2733  | 308.1403        | 598.2467       | 299.6270         | 597.2627       | 299.1350         | D    | 1229.5029 | 615.2551        | 1212.4763      | 606.7418         | 1211.4923      | 606.2498         | 11 |
| 6  | 684.2947  | 342.6510        | 667.2682       | 334.1377         | 666.2842       | 333.6457         | S    | 1114.4760 | 557.7416        | 1097.4494      | 549.2283         | 1096.4654      | 548.7363         | 10 |
| 7  | 813.3373  | 407.1723        | 796.3108       | 398.6590         | 795.3268       | 398.1670         | E    | 1045.4545 | 523.2309        | 1028.4279      | 514.7176         | 1027.4439      | 514.2256         | 9  |
| 8  | 942.3799  | 471.6936        | 925.3534       | 463.1803         | 924.3694       | 462.6883         | E    | 916.4119  | 458.7096        | 899.3854       | 450.1963         | 898.4013       | 449.7043         | 8  |
| 9  | 1071.4225 | 536.2149        | 1054.3960      | 527.7016         | 1053.4120      | 527.2096         | E    | 787.3693  | 394.1883        | 770.3428       | 385.6750         | 769.3587       | 385.1830         | 7  |
| 10 | 1128.4440 | 564.7256        | 1111.4174      | 556.2124         | 1110.4334      | 555.7203         | G    | 658.3267  | 329.6670        | 641.3002       | 321.1537         | 640.3161       | 320.6617         | 6  |
| 11 | 1225.4968 | 613.2520        | 1208.4702      | 604.7387         | 1207.4862      | 604.2467         | P    | 601.3052  | 301.1563        | 584.2787       | 292.6430         | 583.2947       | 292.1510         | 5  |
| 12 | 1312.5288 | 656.7680        | 1295.5022      | 648.2548         | 1294.5182      | 647.7627         | S    | 504.2525  | 252.6299        | 487.2259       | 244.1166         | 486.2419       | 243.6246         | 4  |
| 13 | 1426.5717 | 713.7895        | 1409.5452      | 705.2762         | 1408.5611      | 704.7842         | N    | 417.2205  | 209.1139        | 400.1939       | 200.6006         |                |                  | 3  |
| 14 | 1554.6303 | 777.8188        | 1537.6037      | 769.3055         | 1536.6197      | 768.8135         | Q    | 303.1775  | 152.0924        | 286.1510       | 143.5791         |                |                  | 2  |
| 15 |           |                 |                |                  |                |                  | R    | 175.1190  | 88.0631         | 158.0924       | 79.5498          |                |                  | 1  |

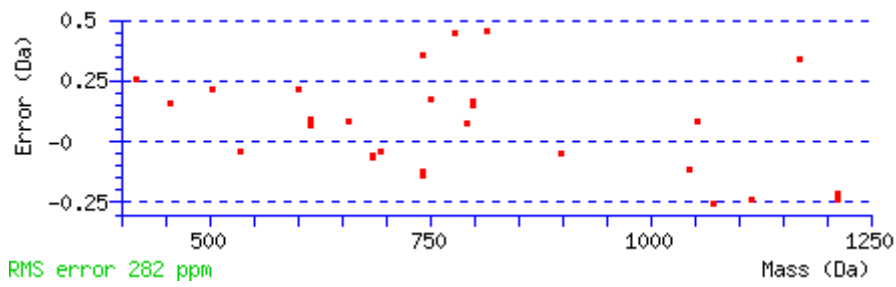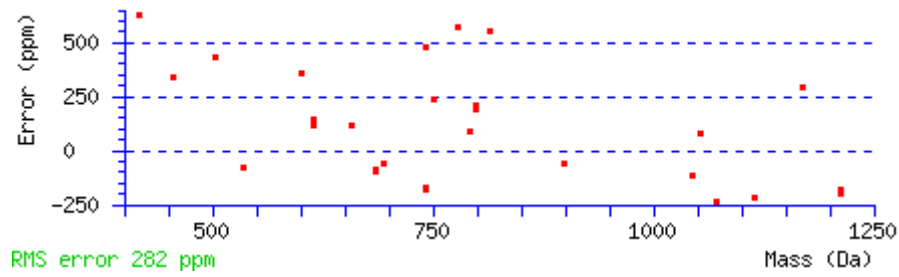



IDENTIFICATION 41

MS/MS Fragmentation of **YRAQLLEPSK**

Found in **IPI00134820**

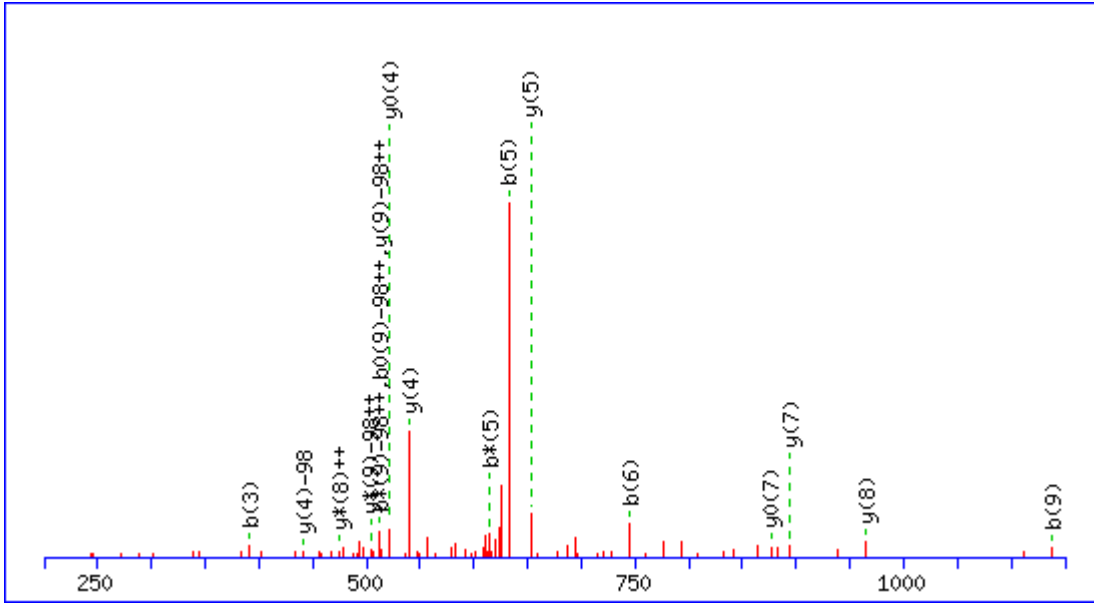

Monoisotopic mass of neutral peptide  $M_r(\text{calc})$ : 1283.6275 Fixed modifications: Carbamidomethyl (C) (apply to specified residues or termini only) Variable modifications: S9 : Phospho (ST), with neutral losses 0.0000 (shown in table), 97.9769 Ions Score: 31 Expect: 0.076 (help)

| #  | b         | b <sup>++</sup> | b <sup>*</sup> | b <sup>+++</sup> | b <sub>0</sub> | b <sup>0++</sup> | Seq. | y         | y <sup>++</sup> | y <sup>*</sup> | y <sup>+++</sup> | y <sup>0</sup> | y <sup>0++</sup> | #  |
|----|-----------|-----------------|----------------|------------------|----------------|------------------|------|-----------|-----------------|----------------|------------------|----------------|------------------|----|
| 1  | 164.0706  | 82.5389         |                |                  |                |                  | Y    |           |                 |                |                  |                |                  | 10 |
| 2  | 320.1717  | 160.5895        | 303.1452       | 152.0762         |                |                  | R    | 1121.5715 | 561.2894        | 1104.5449      | 552.7761         | 1103.5609      | 552.2841         | 9  |
| 3  | 391.2088  | 196.1081        | 374.1823       | 187.5948         |                |                  | A    | 965.4703  | 483.2388        | 948.4438       | 474.7255         | 947.4598       | 474.2335         | 8  |
| 4  | 519.2674  | 260.1373        | 502.2409       | 251.6241         |                |                  | Q    | 894.4332  | 447.7203        | 877.4067       | 439.2070         | 876.4227       | 438.7150         | 7  |
| 5  | 632.3515  | 316.6794        | 615.3249       | 308.1661         |                |                  | L    | 766.3746  | 383.6910        | 749.3481       | 375.1777         | 748.3641       | 374.6857         | 6  |
| 6  | 745.4355  | 373.2214        | 728.4090       | 364.7081         |                |                  | L    | 653.2906  | 327.1489        | 636.2640       | 318.6357         | 635.2800       | 318.1436         | 5  |
| 7  | 874.4781  | 437.7427        | 857.4516       | 429.2294         | 856.4676       | 428.7374         | E    | 540.2065  | 270.6069        | 523.1800       | 262.0936         | 522.1960       | 261.6016         | 4  |
| 8  | 971.5309  | 486.2691        | 954.5043       | 477.7558         | 953.5203       | 477.2638         | P    | 411.1639  | 206.0856        | 394.1374       | 197.5723         | 393.1534       | 197.0803         | 3  |
| 9  | 1138.5293 | 569.7683        | 1121.5027      | 561.2550         | 1120.5187      | 560.7630         | S    | 314.1112  | 157.5592        | 297.0846       | 149.0459         | 296.1006       | 148.5539         | 2  |
| 10 |           |                 |                |                  |                |                  | K    | 147.1128  | 74.0600         | 130.0863       | 65.5468          |                |                  | 1  |

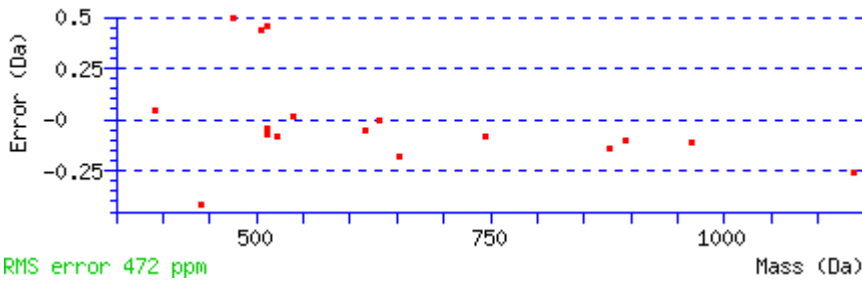

RMS error 472 ppm

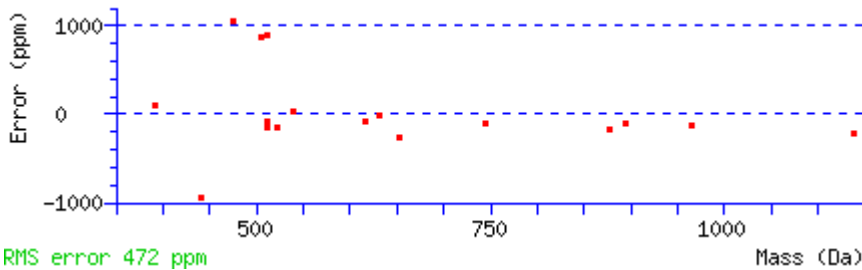

RMS error 472 ppm

IDENTIFICATION 42

MS/MS Fragmentation of **DIYMSGGLVSSEK**

Found in **IPI00330560**

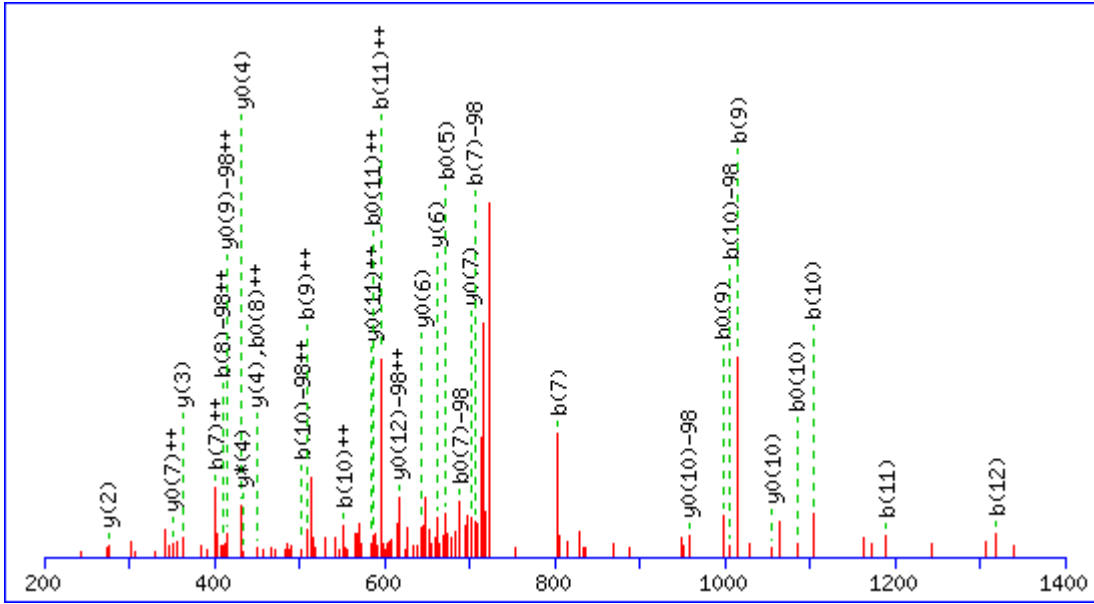

Monoisotopic mass of neutral peptide  $M_r(\text{calc})$ : 1464.6207

Fixed modifications: Carbamidomethyl (C) (apply to specified residues or termini only)

Variable modifications:

S5 : Phospho (ST), with neutral losses 0.0000 (shown in table), 97.9769

Ions Score: 33 Expect: 0.057 (help)

| #  | b         | b <sup>++</sup> | b <sup>0</sup> | b <sup>0++</sup> | Seq. | y         | y <sup>++</sup> | y <sup>*</sup> | y <sup>+++</sup> | y <sup>0</sup> | y <sup>0++</sup> | #  |
|----|-----------|-----------------|----------------|------------------|------|-----------|-----------------|----------------|------------------|----------------|------------------|----|
| 1  | 116.0342  | 58.5207         | 98.0237        | 49.5155          | D    |           |                 |                |                  |                |                  | 13 |
| 2  | 279.0975  | 140.0524        | 261.0870       | 131.0471         | Y    | 1350.6011 | 675.8042        | 1333.5745      | 667.2909         | 1332.5905      | 666.7989         | 12 |
| 3  | 392.1816  | 196.5944        | 374.1710       | 187.5892         | I    | 1187.5378 | 594.2725        | 1170.5112      | 585.7592         | 1169.5272      | 585.2672         | 11 |
| 4  | 523.2221  | 262.1147        | 505.2115       | 253.1094         | M    | 1074.4537 | 537.7305        | 1057.4272      | 529.2172         | 1056.4431      | 528.7252         | 10 |
| 5  | 690.2205  | 345.6139        | 672.2099       | 336.6086         | S    | 943.4132  | 472.2102        | 926.3867       | 463.6970         | 925.4027       | 463.2050         | 9  |
| 6  | 747.2419  | 374.1246        | 729.2314       | 365.1193         | G    | 776.4149  | 388.7111        | 759.3883       | 380.1978         | 758.4043       | 379.7058         | 8  |
| 7  | 804.2634  | 402.6353        | 786.2528       | 393.6300         | G    | 719.3934  | 360.2003        | 702.3668       | 351.6871         | 701.3828       | 351.1951         | 7  |
| 8  | 917.3474  | 459.1774        | 899.3369       | 450.1721         | L    | 662.3719  | 331.6896        | 645.3454       | 323.1763         | 644.3614       | 322.6843         | 6  |
| 9  | 1016.4159 | 508.7116        | 998.4053       | 499.7063         | V    | 549.2879  | 275.1476        | 532.2613       | 266.6343         | 531.2773       | 266.1423         | 5  |
| 10 | 1103.4479 | 552.2276        | 1085.4373      | 543.2223         | S    | 450.2195  | 225.6134        | 433.1929       | 217.1001         | 432.2089       | 216.6081         | 4  |
| 11 | 1190.4799 | 595.7436        | 1172.4694      | 586.7383         | S    | 363.1874  | 182.0974        | 346.1609       | 173.5841         | 345.1769       | 173.0921         | 3  |
| 12 | 1319.5225 | 660.2649        | 1301.5119      | 651.2596         | E    | 276.1554  | 138.5813        | 259.1288       | 130.0681         | 258.1448       | 129.5761         | 2  |
| 13 |           |                 |                |                  | K    | 147.1128  | 74.0600         | 130.0863       | 65.5468          |                |                  | 1  |

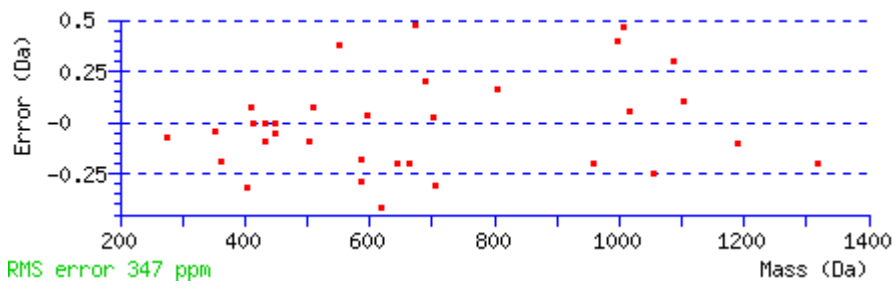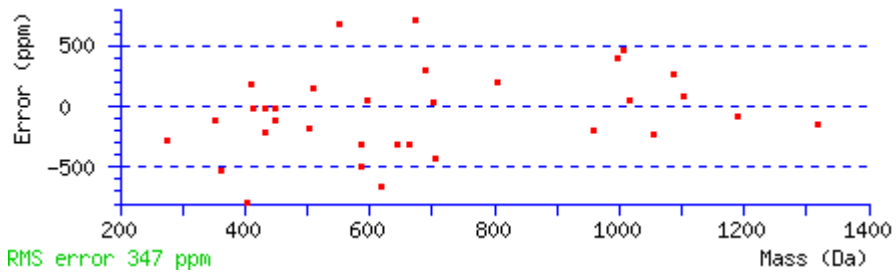

IDENTIFICATION 43

MS/MS Fragmentation of **AGDVLEDSPKRPK**

Found in **IPI00313817**

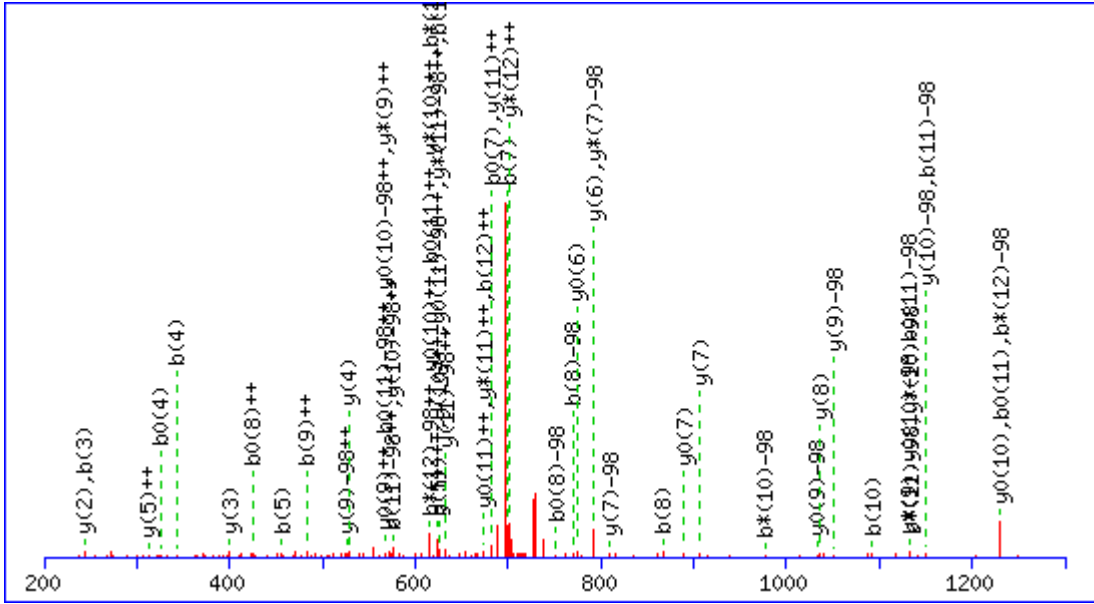

Monoisotopic mass of neutral peptide Mr(calc): 1490.7130

Fixed modifications: Carbamidomethyl (C) (apply to specified residues or termini only)

Variable modifications:

S8 : Phospho (ST), with neutral losses 97.9769 (shown in table), 0.0000

Ions Score: 30 Expect: 0.12 (help)

| #  | b                | b <sup>++</sup> | b <sup>*</sup>   | b <sup>+++</sup> | b <sup>0</sup>   | b <sup>0++</sup> | Seq. | y                | y <sup>++</sup> | y <sup>*</sup>   | y <sup>+++</sup> | y <sup>0</sup>   | y <sup>0++</sup> | #  |
|----|------------------|-----------------|------------------|------------------|------------------|------------------|------|------------------|-----------------|------------------|------------------|------------------|------------------|----|
| 1  | 72.0444          | 36.5258         |                  |                  |                  |                  | A    |                  |                 |                  |                  |                  |                  | 13 |
| 2  | 129.0659         | 65.0366         |                  |                  |                  |                  | G    | 1322.7063        | 661.8568        | 1305.6797        | 653.3435         | 1304.6957        | 652.8515         | 12 |
| 3  | <b>244.0928</b>  | 122.5500        |                  |                  | 226.0822         | 113.5448         | D    | 1265.6848        | <b>633.3461</b> | 1248.6583        | <b>624.8328</b>  | 1247.6743        | <b>624.3408</b>  | 11 |
| 4  | <b>343.1612</b>  | 172.0842        |                  |                  | <b>325.1506</b>  | 163.0790         | V    | <b>1150.6579</b> | <b>575.8326</b> | <b>1133.6313</b> | 567.3193         | <b>1132.6473</b> | <b>566.8273</b>  | 10 |
| 5  | <b>456.2453</b>  | 228.6263        |                  |                  | 438.2347         | 219.6210         | L    | <b>1051.5895</b> | <b>526.2984</b> | 1034.5629        | 517.7851         | <b>1033.5789</b> | 517.2931         | 9  |
| 6  | 585.2879         | 293.1476        |                  |                  | 567.2773         | 284.1423         | E    | 938.5054         | 469.7563        | 921.4789         | 461.2431         | 920.4948         | 460.7511         | 8  |
| 7  | <b>700.3148</b>  | 350.6610        |                  |                  | <b>682.3042</b>  | 341.6558         | D    | <b>809.4628</b>  | 405.2350        | <b>792.4363</b>  | 396.7218         | 791.4522         | 396.2298         | 7  |
| 8  | <b>769.3363</b>  | 385.1718        |                  |                  | <b>751.3257</b>  | 376.1665         | S    | 694.4359         | 347.7216        | 677.4093         | 339.2083         | 676.4253         | 338.7163         | 6  |
| 9  | 866.3890         | 433.6982        |                  |                  | 848.3785         | 424.6929         | P    | <b>625.4144</b>  | <b>313.2108</b> | 608.3879         | 304.6976         |                  |                  | 5  |
| 10 | 994.4840         | 497.7456        | <b>977.4575</b>  | 489.2324         | 976.4734         | 488.7404         | K    | <b>528.3616</b>  | 264.6845        | 511.3351         | 256.1712         |                  |                  | 4  |
| 11 | <b>1150.5851</b> | <b>575.7962</b> | <b>1133.5586</b> | 567.2829         | <b>1132.5745</b> | <b>566.7909</b>  | R    | <b>400.2667</b>  | 200.6370        | 383.2401         | 192.1237         |                  |                  | 3  |
| 12 | 1247.6379        | <b>624.3226</b> | <b>1230.6113</b> | <b>615.8093</b>  | 1229.6273        | 615.3173         | P    | <b>244.1656</b>  | 122.5864        | 227.1390         | 114.0731         |                  |                  | 2  |
| 13 |                  |                 |                  |                  |                  |                  | K    | 147.1128         | 74.0600         | 130.0863         | 65.5468          |                  |                  | 1  |

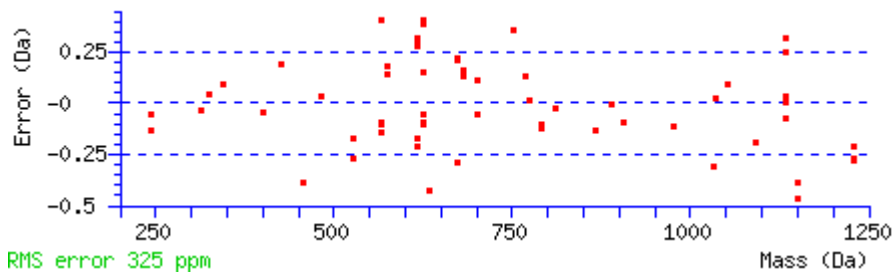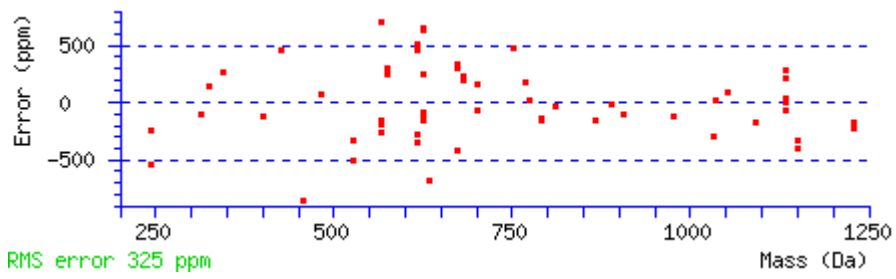

IDENTIFICATION 44

MS/MS Fragmentation of **STSA PQMSPGSSDNQSSSPQPAQK**  
 Found in **IPI00407835**

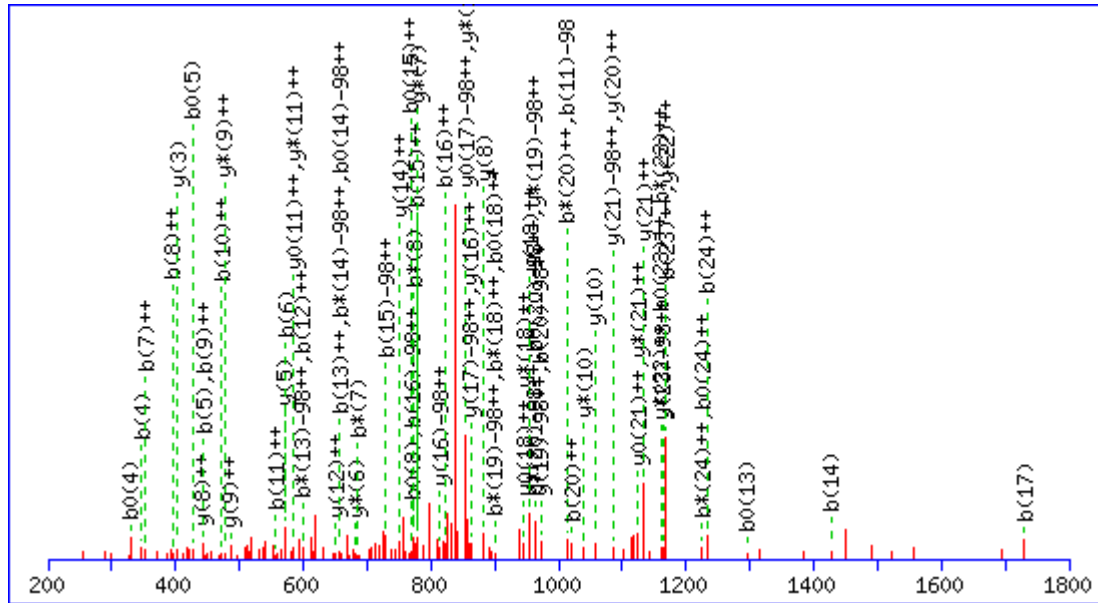

Monoisotopic mass of neutral peptide Mr(calc): 2611.0857

Fixed modifications: Carbamidomethyl (C) (apply to specified residues or termini only)

Variable modifications:

S11 : Phospho (ST), with neutral losses 0.0000 (shown in table), 97.9769

Ions Score: 21 Expect: 1.8 (help)

| #  | b         | b <sup>++</sup> | b <sup>*</sup> | b <sup>+++</sup> | b <sup>0</sup> | b <sup>0++</sup> | Seq. | y         | y <sup>++</sup> | y <sup>*</sup> | y <sup>+++</sup> | y <sup>0</sup> | y <sup>0++</sup> | #  |
|----|-----------|-----------------|----------------|------------------|----------------|------------------|------|-----------|-----------------|----------------|------------------|----------------|------------------|----|
| 1  | 88.0393   | 44.5233         |                |                  | 70.0287        | 35.5180          | S    |           |                 |                |                  |                |                  | 25 |
| 2  | 189.0870  | 95.0471         |                |                  | 171.0764       | 86.0418          | T    | 2525.0610 | 1263.0341       | 2508.0345      | 1254.5209        | 2507.0504      | 1254.0289        | 24 |
| 3  | 276.1190  | 138.5631        |                |                  | 258.1084       | 129.5579         | S    | 2424.0133 | 1212.5103       | 2406.9868      | 1203.9970        | 2406.0028      | 1203.5050        | 23 |
| 4  | 347.1561  | 174.0817        |                |                  | 329.1456       | 165.0764         | A    | 2336.9813 | 1168.9943       | 2319.9547      | 1160.4810        | 2318.9707      | 1159.9890        | 22 |
| 5  | 444.2089  | 222.6081        |                |                  | 426.1983       | 213.6028         | P    | 2265.9442 | 1133.4757       | 2248.9176      | 1124.9625        | 2247.9336      | 1124.4704        | 21 |
| 6  | 572.2675  | 286.6374        | 555.2409       | 278.1241         | 554.2569       | 277.6321         | Q    | 2168.8914 | 1084.9493       | 2151.8649      | 1076.4361        | 2150.8809      | 1075.9441        | 20 |
| 7  | 703.3080  | 352.1576        | 686.2814       | 343.6443         | 685.2974       | 343.1523         | M    | 2040.8328 | 1020.9201       | 2023.8063      | 1012.4068        | 2022.8223      | 1011.9148        | 19 |
| 8  | 790.3400  | 395.6736        | 773.3134       | 387.1604         | 772.3294       | 386.6683         | S    | 1909.7924 | 955.3998        | 1892.7658      | 946.8865         | 1891.7818      | 946.3945         | 18 |
| 9  | 887.3927  | 444.2000        | 870.3662       | 435.6867         | 869.3822       | 435.1947         | P    | 1822.7603 | 911.8838        | 1805.7338      | 903.3705         | 1804.7498      | 902.8785         | 17 |
| 10 | 944.4142  | 472.7107        | 927.3877       | 464.1975         | 926.4036       | 463.7055         | G    | 1725.7076 | 863.3574        | 1708.6810      | 854.8441         | 1707.6970      | 854.3521         | 16 |
| 11 | 1111.4126 | 556.2099        | 1094.3860      | 547.6966         | 1093.4020      | 547.2046         | S    | 1668.6861 | 834.8467        | 1651.6596      | 826.3334         | 1650.6755      | 825.8414         | 15 |
| 12 | 1198.4446 | 599.7259        | 1181.4180      | 591.2127         | 1180.4340      | 590.7207         | S    | 1501.6877 | 751.3475        | 1484.6612      | 742.8342         | 1483.6772      | 742.3422         | 14 |
| 13 | 1313.4715 | 657.2394        | 1296.4450      | 648.7261         | 1295.4610      | 648.2341         | D    | 1414.6557 | 707.8315        | 1397.6292      | 699.3182         | 1396.6451      | 698.8262         | 13 |
| 14 | 1427.5145 | 714.2609        | 1410.4879      | 705.7476         | 1409.5039      | 705.2556         | N    | 1299.6288 | 650.3180        | 1282.6022      | 641.8047         | 1281.6182      | 641.3127         | 12 |
| 15 | 1555.5730 | 778.2902        | 1538.5465      | 769.7769         | 1537.5625      | 769.2849         | Q    | 1185.5858 | 593.2966        | 1168.5593      | 584.7833         | 1167.5753      | 584.2913         | 11 |
| 16 | 1642.6051 | 821.8062        | 1625.5785      | 813.2929         | 1624.5945      | 812.8009         | S    | 1057.5273 | 529.2673        | 1040.5007      | 520.7540         | 1039.5167      | 520.2620         | 10 |
| 17 | 1729.6371 | 865.3222        | 1712.6106      | 856.8089         | 1711.6265      | 856.3169         | S    | 970.4952  | 485.7513        | 953.4687       | 477.2380         | 952.4847       | 476.7460         | 9  |
| 18 | 1816.6691 | 908.8382        | 1799.6426      | 900.3249         | 1798.6586      | 899.8329         | S    | 883.4632  | 442.2352        | 866.4367       | 433.7220         | 865.4526       | 433.2300         | 8  |
| 19 | 1913.7219 | 957.3646        | 1896.6953      | 948.8513         | 1895.7113      | 948.3593         | P    | 796.4312  | 398.7192        | 779.4046       | 390.2060         |                |                  | 7  |
| 20 | 2041.7805 | 1021.3939       | 2024.7539      | 1012.8806        | 2023.7699      | 1012.3886        | Q    | 699.3784  | 350.1928        | 682.3519       | 341.6796         |                |                  | 6  |
| 21 | 2138.8332 | 1069.9203       | 2121.8067      | 1061.4070        | 2120.8227      | 1060.9150        | P    | 571.3198  | 286.1636        | 554.2933       | 277.6503         |                |                  | 5  |
| 22 | 2209.8703 | 1105.4388       | 2192.8438      | 1096.9255        | 2191.8598      | 1096.4335        | A    | 474.2671  | 237.6372        | 457.2405       | 229.1239         |                |                  | 4  |
| 23 | 2337.9289 | 1169.4681       | 2320.9024      | 1160.9548        | 2319.9184      | 1160.4628        | Q    | 403.2300  | 202.1186        | 386.2034       | 193.6053         |                |                  | 3  |
| 24 | 2465.9875 | 1233.4974       | 2448.9610      | 1224.9841        | 2447.9769      | 1224.4921        | Q    | 275.1714  | 138.0893        | 258.1448       | 129.5761         |                |                  | 2  |
| 25 |           |                 |                |                  |                |                  | K    | 147.1128  | 74.0600         | 130.0863       | 65.5468          |                |                  | 1  |

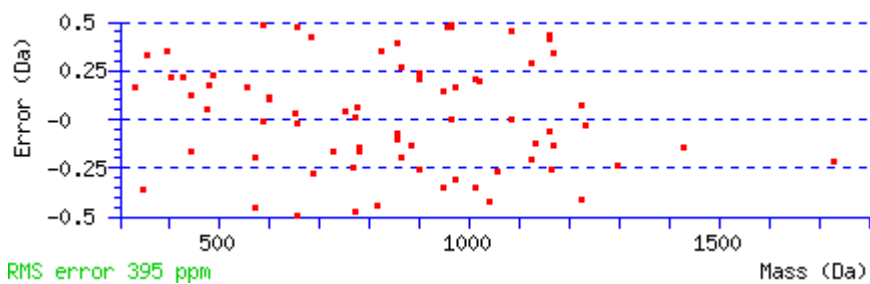

RMS error 395 ppm

Mass (Da)

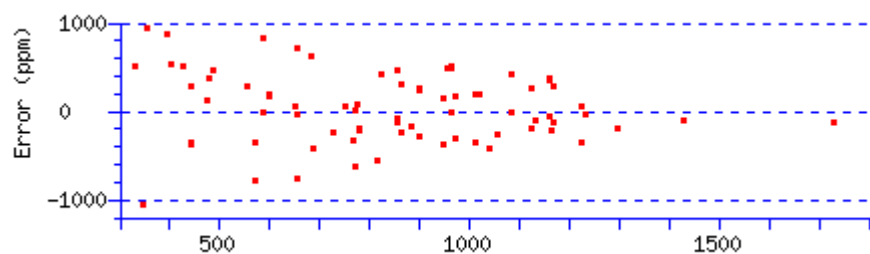

RMS error 395 ppm

Mass (Da)

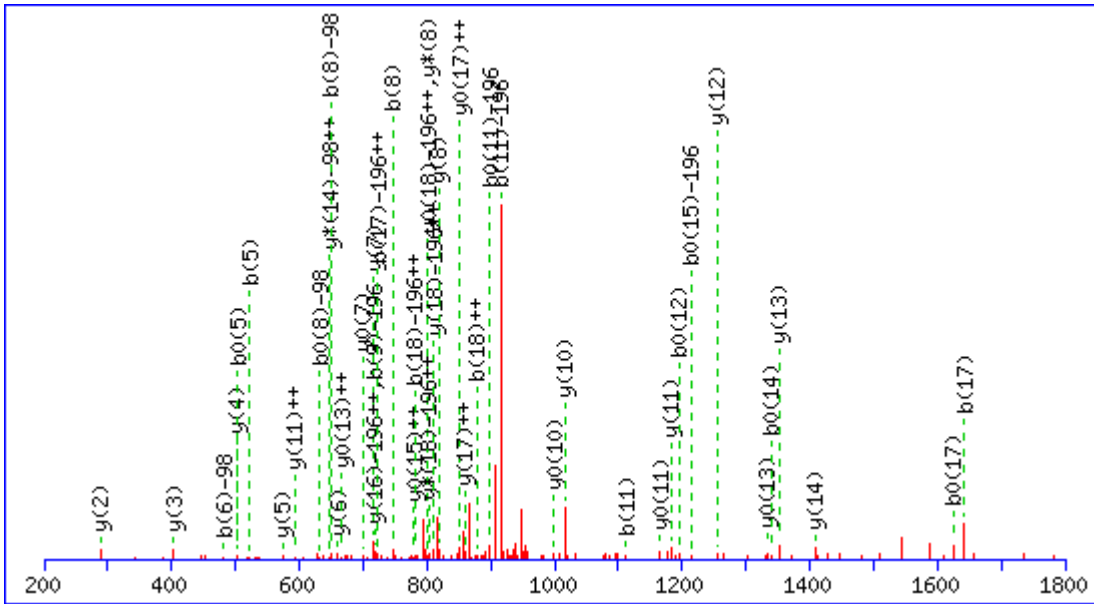

Monoisotopic mass of neutral peptide Mr(calc):

1928.8282

Fixed modifications:

Carbamidomethyl (C) (apply to specified residues or termini only)

Variable modifications:

S5 :

Phospho (ST), with neutral losses 0.0000(shown in table), 97.9769

S9 :

Phospho (ST), with neutral losses 0.0000(shown in table), 97.9769

Ions Score:

68

Expect:

2.9e-05 (

help

)

| #  | b         | b <sup>++</sup> | b <sup>0</sup> | b <sup>0++</sup> | Seq. | y         | y <sup>++</sup> | y <sup>*</sup> | y <sup>+++</sup> | y <sup>0</sup> | y <sup>0++</sup> | #  |
|----|-----------|-----------------|----------------|------------------|------|-----------|-----------------|----------------|------------------|----------------|------------------|----|
| 1  | 114.0913  | 57.5493         |                |                  | L    |           |                 |                |                  |                |                  | 19 |
| 2  | 211.1441  | 106.0757        |                |                  | P    | 1816.7514 | 908.8793        | 1799.7249      | 900.3661         | 1798.7409      | 899.8741         | 18 |
| 3  | 298.1761  | 149.5917        | 280.1656       | 140.5864         | S    | 1719.6987 | 860.3530        | 1702.6721      | 851.8397         | 1701.6881      | 851.3477         | 17 |
| 4  | 355.1976  | 178.1024        | 337.1870       | 169.0972         | G    | 1632.6666 | 816.8370        | 1615.6401      | 808.3237         | 1614.6561      | 807.8317         | 16 |
| 5  | 522.1960  | 261.6016        | 504.1854       | 252.5963         | S    | 1575.6452 | 788.3262        | 1558.6186      | 779.8129         | 1557.6346      | 779.3209         | 15 |
| 6  | 579.2174  | 290.1123        | 561.2069       | 281.1071         | G    | 1408.6468 | 704.8270        | 1391.6203      | 696.3138         | 1390.6362      | 695.8218         | 14 |
| 7  | 676.2702  | 338.6387        | 658.2596       | 329.6334         | P    | 1351.6253 | 676.3163        | 1334.5988      | 667.8030         | 1333.6148      | 667.3110         | 13 |
| 8  | 747.3073  | 374.1573        | 729.2967       | 365.1520         | A    | 1254.5726 | 627.7899        | 1237.5460      | 619.2767         | 1236.5620      | 618.7846         | 12 |
| 9  | 914.3057  | 457.6565        | 896.2951       | 448.6512         | S    | 1183.5355 | 592.2714        | 1166.5089      | 583.7581         | 1165.5249      | 583.2661         | 11 |
| 10 | 1011.3584 | 506.1828        | 993.3479       | 497.1776         | P    | 1016.5371 | 508.7722        | 999.5106       | 500.2589         | 998.5265       | 499.7669         | 10 |
| 11 | 1112.4061 | 556.7067        | 1094.3955      | 547.7014         | T    | 919.4843  | 460.2458        | 902.4578       | 451.7325         | 901.4738       | 451.2405         | 9  |



|    |           |          |           |          |   |          |          |          |          |          |          |   |
|----|-----------|----------|-----------|----------|---|----------|----------|----------|----------|----------|----------|---|
| 12 | 1213.4538 | 607.2305 | 1195.4432 | 598.2252 | T | 818.4367 | 409.7220 | 801.4101 | 401.2087 | 800.4261 | 400.7167 | 8 |
| 13 | 1270.4752 | 635.7413 | 1252.4647 | 626.7360 | G | 717.3890 | 359.1981 | 700.3624 | 350.6849 | 699.3784 | 350.1928 | 7 |
| 14 | 1357.5073 | 679.2573 | 1339.4967 | 670.2520 | S | 660.3675 | 330.6874 | 643.3410 | 322.1741 | 642.3570 | 321.6821 | 6 |
| 15 | 1428.5444 | 714.7758 | 1410.5338 | 705.7705 | A | 573.3355 | 287.1714 | 556.3089 | 278.6581 | 555.3249 | 278.1661 | 5 |
| 16 | 1527.6128 | 764.3100 | 1509.6022 | 755.3048 | V | 502.2984 | 251.6528 | 485.2718 | 243.1395 | 484.2878 | 242.6475 | 4 |
| 17 | 1642.6397 | 821.8235 | 1624.6292 | 812.8182 | D | 403.2300 | 202.1186 | 386.2034 | 193.6053 | 385.2194 | 193.1133 | 3 |
| 18 | 1755.7238 | 878.3655 | 1737.7132 | 869.3603 | I | 288.2030 | 144.6051 | 271.1765 | 136.0919 |          |          | 2 |
| 19 |           |          |           |          | R | 175.1190 | 88.0631  | 158.0924 | 79.5498  |          |          | 1 |

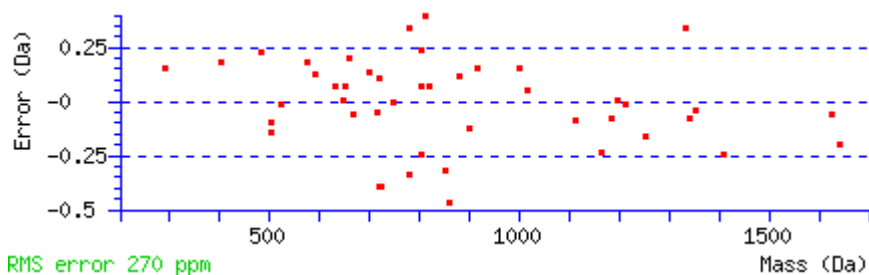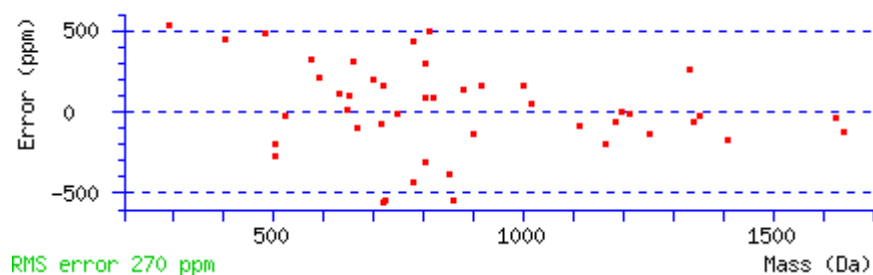

IDENTIFICATION 46

MS/MS Fragmentation of **SNSSDAPGEESSETEKEIPVEQK**

Found in **IPI00120691**

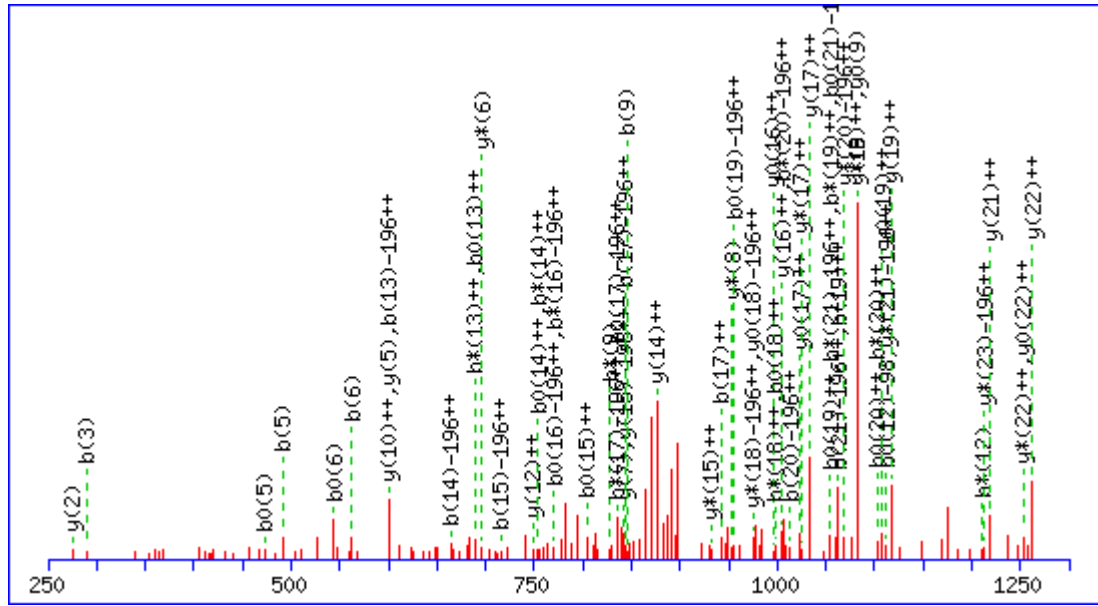

Monoisotopic mass of neutral peptide Mr(calc): 2723.0735

Fixed modifications: Carbamidomethyl (C) (apply to specified residues or termini only)

Variable modifications:

S12 : Phospho (ST), with neutral losses 0.0000(shown in table), 97.9769

S13 : Phospho (ST), with neutral losses 0.0000(shown in table), 97.9769

Ions Score: 23 Expect: 1.1 (help)

| #  | b         | b <sup>++</sup> | b <sup>*</sup> | b <sup>+++</sup> | b <sup>0</sup> | b <sup>0++</sup> | Seq. | y         | y <sup>++</sup> | y <sup>*</sup> | y <sup>+++</sup> | y <sup>0</sup> | y <sup>0++</sup> | #  |
|----|-----------|-----------------|----------------|------------------|----------------|------------------|------|-----------|-----------------|----------------|------------------|----------------|------------------|----|
| 1  | 88.0393   | 44.5233         |                |                  | 70.0287        | 35.5180          | S    |           |                 |                |                  |                |                  | 24 |
| 2  | 202.0822  | 101.5448        | 185.0557       | 93.0315          | 184.0717       | 92.5395          | N    | 2637.0488 | 1319.0281       | 2620.0223      | 1310.5148        | 2619.0383      | 1310.0228        | 23 |
| 3  | 289.1143  | 145.0608        | 272.0877       | 136.5475         | 271.1037       | 136.0555         | S    | 2523.0059 | 1262.0066       | 2505.9794      | 1253.4933        | 2504.9953      | 1253.0013        | 22 |
| 4  | 376.1463  | 188.5768        | 359.1197       | 180.0635         | 358.1357       | 179.5715         | S    | 2435.9739 | 1218.4906       | 2418.9473      | 1209.9773        | 2417.9633      | 1209.4853        | 21 |
| 5  | 491.1732  | 246.0903        | 474.1467       | 237.5770         | 473.1627       | 237.0850         | D    | 2348.9419 | 1174.9746       | 2331.9153      | 1166.4613        | 2330.9313      | 1165.9693        | 20 |
| 6  | 562.2103  | 281.6088        | 545.1838       | 273.0955         | 544.1998       | 272.6035         | A    | 2233.9149 | 1117.4611       | 2216.8884      | 1108.9478        | 2215.9043      | 1108.4558        | 19 |
| 7  | 659.2631  | 330.1352        | 642.2366       | 321.6219         | 641.2525       | 321.1299         | P    | 2162.8778 | 1081.9425       | 2145.8512      | 1073.4293        | 2144.8672      | 1072.9373        | 18 |
| 8  | 716.2846  | 358.6459        | 699.2580       | 350.1326         | 698.2740       | 349.6406         | G    | 2065.8250 | 1033.4162       | 2048.7985      | 1024.9029        | 2047.8145      | 1024.4109        | 17 |
| 9  | 845.3272  | 423.1672        | 828.3006       | 414.6539         | 827.3166       | 414.1619         | E    | 2008.8036 | 1004.9054       | 1991.7770      | 996.3921         | 1990.7930      | 995.9001         | 16 |
| 10 | 974.3698  | 487.6885        | 957.3432       | 479.1752         | 956.3592       | 478.6832         | E    | 1879.7610 | 940.3841        | 1862.7344      | 931.8709         | 1861.7504      | 931.3788         | 15 |
| 11 | 1061.4018 | 531.2045        | 1044.3752      | 522.6913         | 1043.3912      | 522.1992         | S    | 1750.7184 | 875.8628        | 1733.6918      | 867.3496         | 1732.7078      | 866.8575         | 14 |
| 12 | 1228.4001 | 614.7037        | 1211.3736      | 606.1904         | 1210.3896      | 605.6984         | S    | 1663.6864 | 832.3468        | 1646.6598      | 823.8335         | 1645.6758      | 823.3415         | 13 |
| 13 | 1395.3985 | 698.2029        | 1378.3720      | 689.6896         | 1377.3879      | 689.1976         | S    | 1496.6880 | 748.8476        | 1479.6614      | 740.3344         | 1478.6774      | 739.8424         | 12 |
| 14 | 1524.4411 | 762.7242        | 1507.4145      | 754.2109         | 1506.4305      | 753.7189         | E    | 1329.6896 | 665.3485        | 1312.6631      | 656.8352         | 1311.6791      | 656.3432         | 11 |
| 15 | 1625.4888 | 813.2480        | 1608.4622      | 804.7348         | 1607.4782      | 804.2427         | T    | 1200.6470 | 600.8272        | 1183.6205      | 592.3139         | 1182.6365      | 591.8219         | 10 |
| 16 | 1754.5314 | 877.7693        | 1737.5048      | 869.2560         | 1736.5208      | 868.7640         | E    | 1099.5994 | 550.3033        | 1082.5728      | 541.7900         | 1081.5888      | 541.2980         | 9  |
| 17 | 1882.6263 | 941.8168        | 1865.5998      | 933.3035         | 1864.6158      | 932.8115         | K    | 970.5568  | 485.7820        | 953.5302       | 477.2688         | 952.5462       | 476.7767         | 8  |
| 18 | 2011.6689 | 1006.3381       | 1994.6424      | 997.8248         | 1993.6584      | 997.3328         | E    | 842.4618  | 421.7345        | 825.4353       | 413.2213         | 824.4512       | 412.7293         | 7  |
| 19 | 2124.7530 | 1062.8801       | 2107.7264      | 1054.3669        | 2106.7424      | 1053.8749        | I    | 713.4192  | 357.2132        | 696.3927       | 348.7000         | 695.4087       | 348.2080         | 6  |
| 20 | 2221.8058 | 1111.4065       | 2204.7792      | 1102.8932        | 2203.7952      | 1102.4012        | P    | 600.3352  | 300.6712        | 583.3086       | 292.1579         | 582.3246       | 291.6659         | 5  |
| 21 | 2320.8742 | 1160.9407       | 2303.8476      | 1152.4274        | 2302.8636      | 1151.9354        | V    | 503.2824  | 252.1448        | 486.2558       | 243.6316         | 485.2718       | 243.1396         | 4  |
| 22 | 2449.9168 | 1225.4620       | 2432.8902      | 1216.9487        | 2431.9062      | 1216.4567        | E    | 404.2140  | 202.6106        | 387.1874       | 194.0974         | 386.2034       | 193.6053         | 3  |
| 23 | 2577.9753 | 1289.4913       | 2560.9488      | 1280.9780        | 2559.9648      | 1280.4860        | Q    | 275.1714  | 138.0893        | 258.1448       | 129.5761         |                |                  | 2  |
| 24 |           |                 |                |                  |                |                  | K    | 147.1128  | 74.0600         | 130.0863       | 65.5468          |                |                  | 1  |

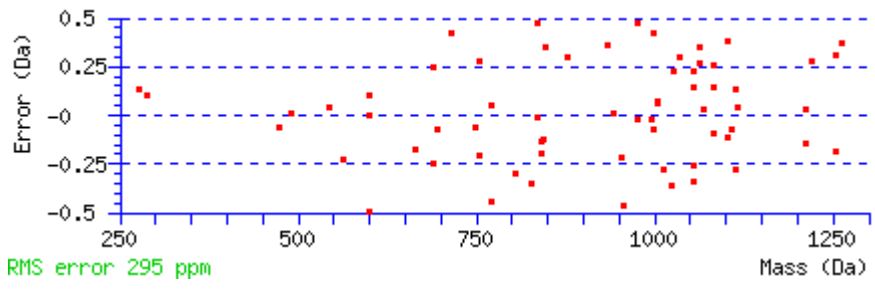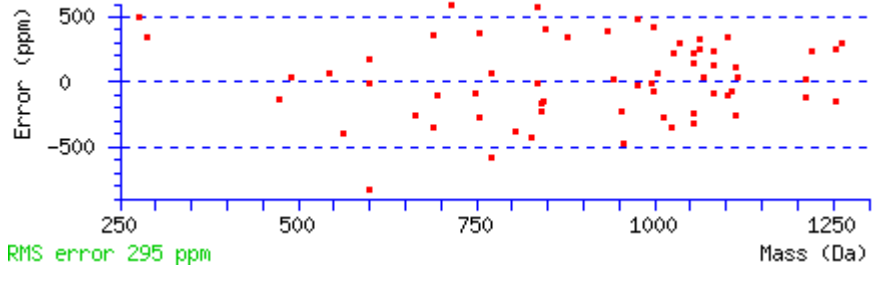

IDENTIFICATION 47

MS/MS Fragmentation of **FKAEAPLSPK**

Found in **IPI00553798**

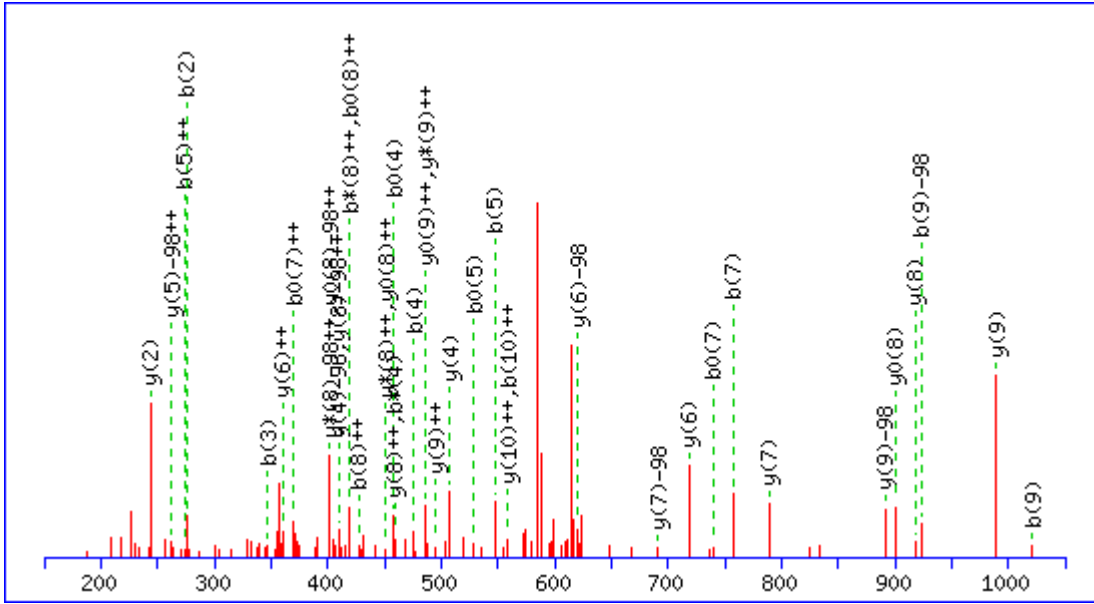

Monoisotopic mass of neutral peptide Mr(calc): 1263.6264 Fixed modifications: Carbamidomethyl (C) (apply to specified residues or termini only) Variable modifications: S9 : Phospho (ST), with neutral losses 0.0000(shown in table), 97.9769 Ions Score: 34 Expect: 0.041 (help)

| #  | b         | b <sup>++</sup> | b <sup>*</sup> | b <sup>+++</sup> | b <sup>0</sup> | b <sup>0++</sup> | Seq. | y         | y <sup>++</sup> | y <sup>*</sup> | y <sup>+++</sup> | y <sup>0</sup> | y <sup>0++</sup> | #  |
|----|-----------|-----------------|----------------|------------------|----------------|------------------|------|-----------|-----------------|----------------|------------------|----------------|------------------|----|
| 1  | 148.0757  | 74.5415         |                |                  |                |                  | F    |           |                 |                |                  |                |                  | 11 |
| 2  | 276.1707  | 138.5890        | 259.1441       | 130.0757         |                |                  | K    | 1117.5653 | 559.2863        | 1100.5388      | 550.7730         | 1099.5547      | 550.2810         | 10 |
| 3  | 347.2078  | 174.1075        | 330.1812       | 165.5942         |                |                  | A    | 989.4703  | 495.2388        | 972.4438       | 486.7255         | 971.4598       | 486.2335         | 9  |
| 4  | 476.2504  | 238.6288        | 459.2238       | 230.1155         | 458.2398       | 229.6235         | E    | 918.4332  | 459.7203        | 901.4067       | 451.2070         | 900.4227       | 450.7150         | 8  |
| 5  | 547.2875  | 274.1474        | 530.2609       | 265.6341         | 529.2769       | 265.1421         | A    | 789.3906  | 395.1990        | 772.3641       | 386.6857         | 771.3801       | 386.1937         | 7  |
| 6  | 644.3402  | 322.6738        | 627.3137       | 314.1605         | 626.3297       | 313.6685         | P    | 718.3535  | 359.6804        | 701.3270       | 351.1671         | 700.3430       | 350.6751         | 6  |
| 7  | 757.4243  | 379.2158        | 740.3978       | 370.7025         | 739.4137       | 370.2105         | L    | 621.3008  | 311.1540        | 604.2742       | 302.6407         | 603.2902       | 302.1487         | 5  |
| 8  | 854.4771  | 427.7422        | 837.4505       | 419.2289         | 836.4665       | 418.7369         | P    | 508.2167  | 254.6120        | 491.1901       | 246.0987         | 490.2061       | 245.6067         | 4  |
| 9  | 1021.4754 | 511.2414        | 1004.4489      | 502.7281         | 1003.4649      | 502.2361         | S    | 411.1639  | 206.0856        | 394.1374       | 197.5723         | 393.1534       | 197.0803         | 3  |
| 10 | 1118.5282 | 559.7677        | 1101.5016      | 551.2545         | 1100.5176      | 550.7624         | P    | 244.1656  | 122.5864        | 227.1390       | 114.0731         |                |                  | 2  |
| 11 |           |                 |                |                  |                |                  | K    | 147.1128  | 74.0600         | 130.0863       | 65.5468          |                |                  | 1  |

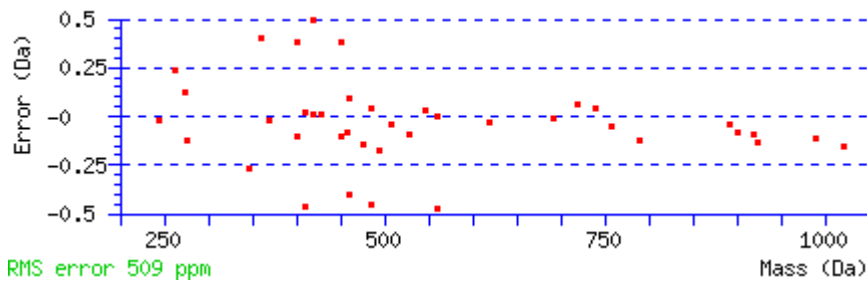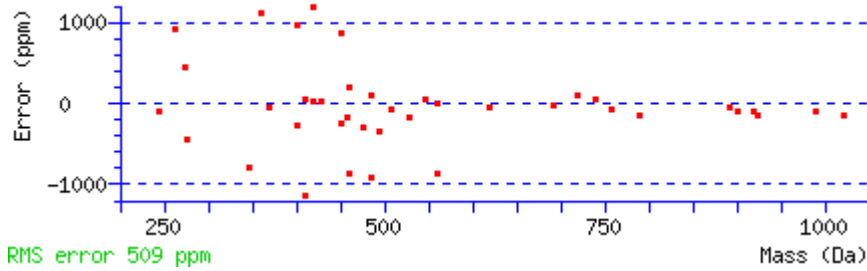

IDENTIFICATION 48

MS/MS Fragmentation of STSATDTHHVELAR

Found in IPI00115094

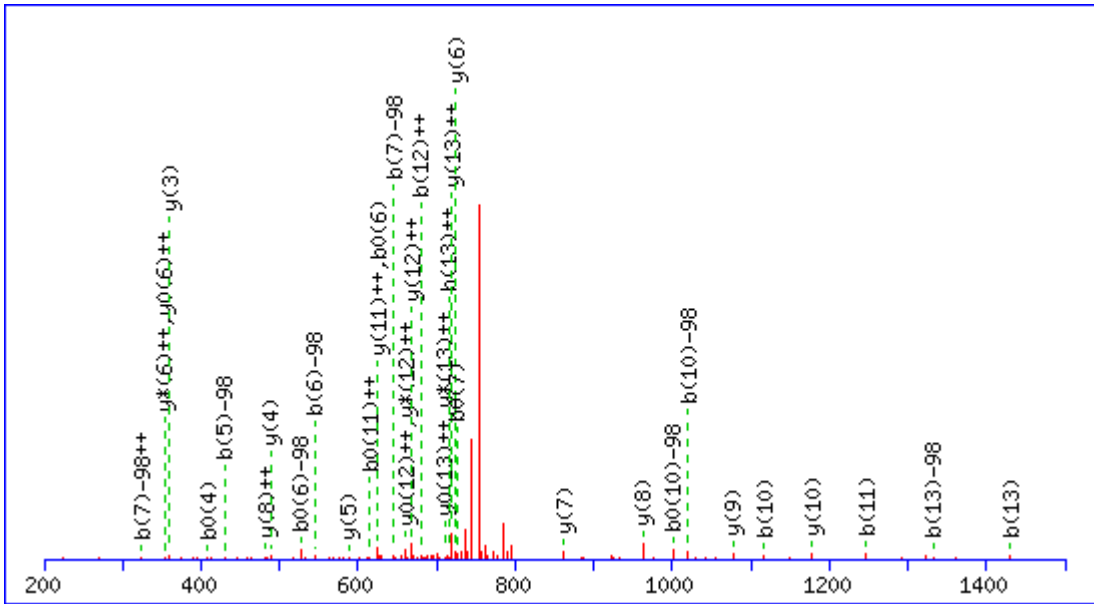

Monoisotopic mass of neutral peptide Mr(calc): 1603.6992

Fixed modifications: Carbamidomethyl (C) (apply to specified residues or termini only)

Variable modifications:

S1 : Phospho (ST), with neutral losses 97.9769 (shown in table), 0.0000

Ions Score: 41 Expect: 0.011 (help)

| #  | b         | b <sup>++</sup> | b <sup>0</sup> | b <sup>0++</sup> | Seq. | y         | y <sup>++</sup> | y <sup>*</sup> | y <sup>+++</sup> | y <sup>0</sup> | y <sup>0++</sup> | #  |
|----|-----------|-----------------|----------------|------------------|------|-----------|-----------------|----------------|------------------|----------------|------------------|----|
| 1  | 70.0287   | 35.5180         | 52.0182        | 26.5127          | S    |           |                 |                |                  |                |                  | 14 |
| 2  | 171.0764  | 86.0418         | 153.0659       | 77.0366          | T    | 1437.7081 | 719.3577        | 1420.6815      | 710.8444         | 1419.6975      | 710.3524         | 13 |
| 3  | 258.1084  | 129.5579        | 240.0979       | 120.5526         | S    | 1336.6604 | 668.8338        | 1319.6339      | 660.3206         | 1318.6498      | 659.8286         | 12 |
| 4  | 329.1456  | 165.0764        | 311.1350       | 156.0711         | A    | 1249.6284 | 625.3178        | 1232.6018      | 616.8046         | 1231.6178      | 616.3125         | 11 |
| 5  | 430.1932  | 215.6003        | 412.1827       | 206.5950         | T    | 1178.5913 | 589.7993        | 1161.5647      | 581.2860         | 1160.5807      | 580.7940         | 10 |
| 6  | 545.2202  | 273.1137        | 527.2096       | 264.1084         | D    | 1077.5436 | 539.2754        | 1060.5170      | 530.7622         | 1059.5330      | 530.2701         | 9  |
| 7  | 646.2679  | 323.6376        | 628.2573       | 314.6323         | T    | 962.5166  | 481.7620        | 945.4901       | 473.2487         | 944.5061       | 472.7567         | 8  |
| 8  | 783.3268  | 392.1670        | 765.3162       | 383.1617         | H    | 861.4690  | 431.2381        | 844.4424       | 422.7248         | 843.4584       | 422.2328         | 7  |
| 9  | 920.3857  | 460.6965        | 902.3751       | 451.6912         | H    | 724.4100  | 362.7087        | 707.3835       | 354.1954         | 706.3995       | 353.7034         | 6  |
| 10 | 1019.4541 | 510.2307        | 1001.4435      | 501.2254         | V    | 587.3511  | 294.1792        | 570.3246       | 285.6659         | 569.3406       | 285.1739         | 5  |
| 11 | 1148.4967 | 574.7520        | 1130.4861      | 565.7467         | E    | 488.2827  | 244.6450        | 471.2562       | 236.1317         | 470.2722       | 235.6397         | 4  |
| 12 | 1261.5808 | 631.2940        | 1243.5702      | 622.2887         | L    | 359.2401  | 180.1237        | 342.2136       | 171.6104         |                |                  | 3  |
| 13 | 1332.6179 | 666.8126        | 1314.6073      | 657.8073         | A    | 246.1561  | 123.5817        | 229.1295       | 115.0684         |                |                  | 2  |
| 14 |           |                 |                |                  | R    | 175.1190  | 88.0631         | 158.0924       | 79.5498          |                |                  | 1  |

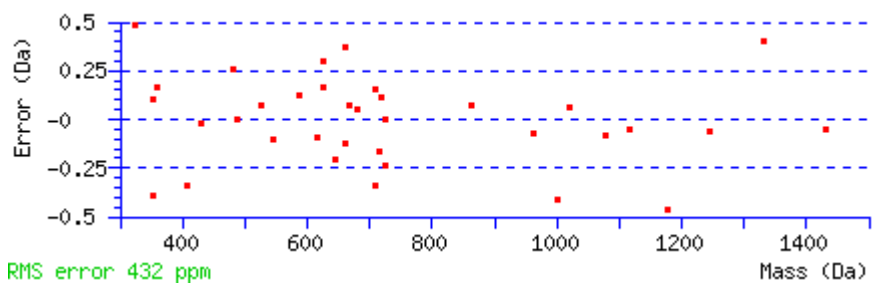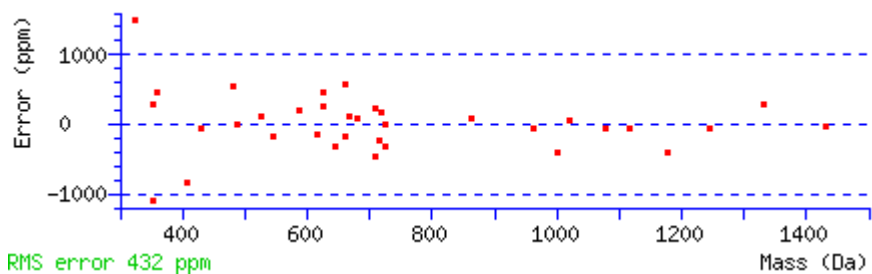

IDENTIFICATION 49

MS/MS Fragmentation of **ASAVSPEKAPMTSK**

Found in **IPI00115660**

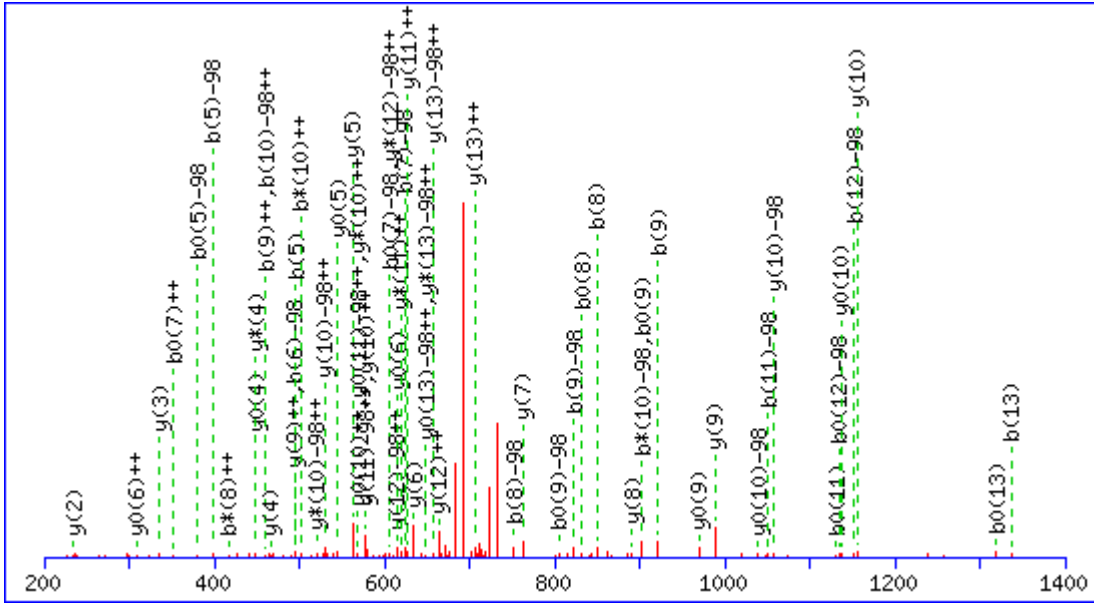

Monoisotopic mass of neutral peptide Mr(calc): 1482.6789

Fixed modifications: Carbamidomethyl (C) (apply to specified residues or termini only)

Variable modifications:

S5 : Phospho (ST), with neutral losses 97.9769 (shown in table), 0.0000

Ions Score: 43 Expect: 0.007 (help)

| #  | b         | b <sup>++</sup> | b <sup>*</sup> | b <sup>+++</sup> | b <sup>0</sup> | b <sup>0++</sup> | Seq. | y         | y <sup>++</sup> | y <sup>*</sup> | y <sup>+++</sup> | y <sup>0</sup> | y <sup>0++</sup> | #  |
|----|-----------|-----------------|----------------|------------------|----------------|------------------|------|-----------|-----------------|----------------|------------------|----------------|------------------|----|
| 1  | 72.0444   | 36.5258         |                |                  |                |                  | A    |           |                 |                |                  |                |                  | 14 |
| 2  | 159.0764  | 80.0418         |                |                  | 141.0659       | 71.0366          | S    | 1314.6722 | 657.8397        | 1297.6457      | 649.3265         | 1296.6616      | 648.8345         | 13 |
| 3  | 230.1135  | 115.5604        |                |                  | 212.1030       | 106.5551         | A    | 1227.6402 | 614.3237        | 1210.6136      | 605.8105         | 1209.6296      | 605.3184         | 12 |
| 4  | 329.1819  | 165.0946        |                |                  | 311.1714       | 156.0893         | V    | 1156.6031 | 578.8052        | 1139.5765      | 570.2919         | 1138.5925      | 569.7999         | 11 |
| 5  | 398.2034  | 199.6053        |                |                  | 380.1928       | 190.6001         | S    | 1057.5347 | 529.2710        | 1040.5081      | 520.7577         | 1039.5241      | 520.2657         | 10 |
| 6  | 495.2562  | 248.1317        |                |                  | 477.2456       | 239.1264         | P    | 988.5132  | 494.7602        | 971.4866       | 486.2470         | 970.5026       | 485.7550         | 9  |
| 7  | 624.2988  | 312.6530        |                |                  | 606.2882       | 303.6477         | E    | 891.4604  | 446.2339        | 874.4339       | 437.7206         | 873.4499       | 437.2286         | 8  |
| 8  | 752.3937  | 376.7005        | 735.3672       | 368.1872         | 734.3832       | 367.6952         | K    | 762.4178  | 381.7126        | 745.3913       | 373.1993         | 744.4073       | 372.7073         | 7  |
| 9  | 823.4308  | 412.2191        | 806.4043       | 403.7058         | 805.4203       | 403.2138         | A    | 634.3229  | 317.6651        | 617.2963       | 309.1518         | 616.3123       | 308.6598         | 6  |
| 10 | 920.4836  | 460.7454        | 903.4571       | 452.2322         | 902.4730       | 451.7402         | P    | 563.2858  | 282.1465        | 546.2592       | 273.6332         | 545.2752       | 273.1412         | 5  |
| 11 | 1051.5241 | 526.2657        | 1034.4975      | 517.7524         | 1033.5135      | 517.2604         | M    | 466.2330  | 233.6201        | 449.2064       | 225.1069         | 448.2224       | 224.6149         | 4  |
| 12 | 1152.5718 | 576.7895        | 1135.5452      | 568.2762         | 1134.5612      | 567.7842         | T    | 335.1925  | 168.0999        | 318.1660       | 159.5866         | 317.1819       | 159.0946         | 3  |
| 13 | 1239.6038 | 620.3055        | 1222.5773      | 611.7923         | 1221.5932      | 611.3003         | S    | 234.1448  | 117.5761        | 217.1183       | 109.0628         | 216.1343       | 108.5708         | 2  |
| 14 |           |                 |                |                  |                |                  | K    | 147.1128  | 74.0600         | 130.0863       | 65.5468          |                |                  | 1  |

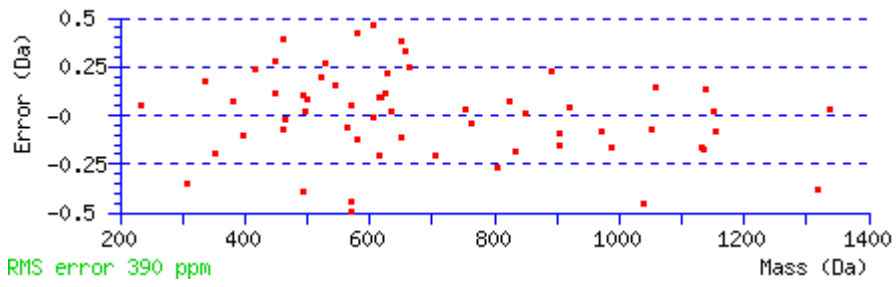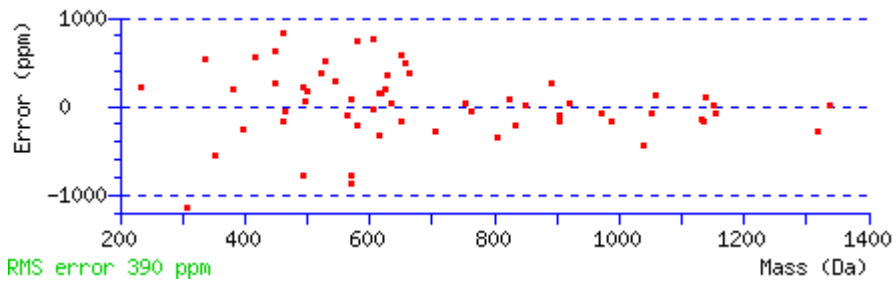



IDENTIFICATION 50

MS/MS Fragmentation of SVSASHEGDVK

Found in IPI00331173

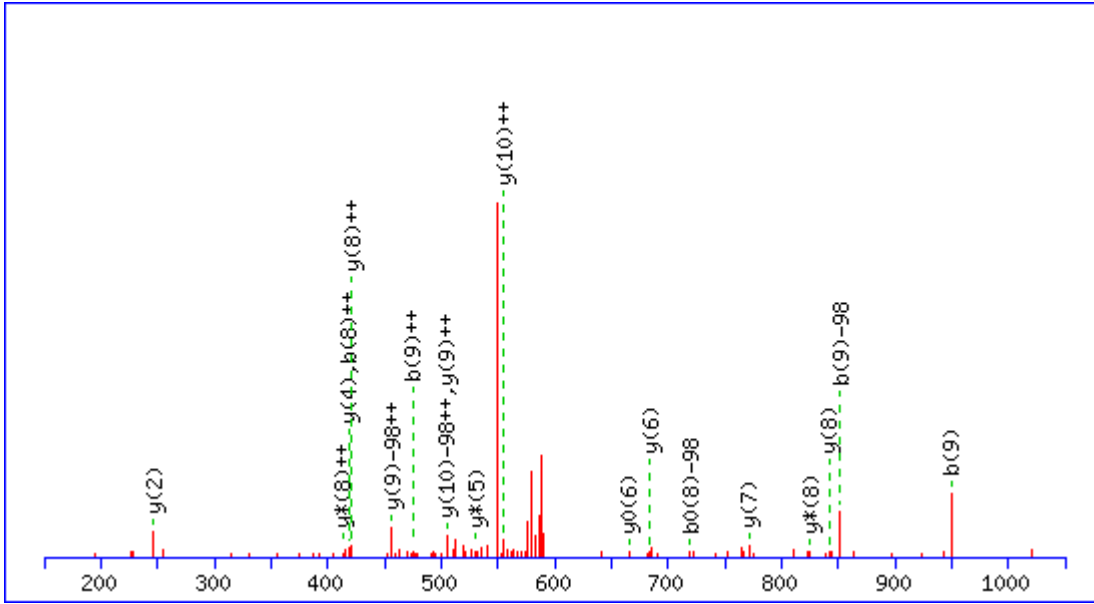

Monoisotopic mass of neutral peptide Mr(calc): 1194.4918

Fixed modifications: Carbamidomethyl (C) (apply to specified residues or termini only)

Variable modifications:

S3 : Phospho (ST), with neutral losses 97.9769 (shown in table), 0.0000

Ions Score: 19 Expect: 1 (help)

| #  | b        | b <sup>++</sup> | b <sup>0</sup> | b <sup>0++</sup> | Seq. | y         | y <sup>++</sup> | y <sup>*</sup> | y <sup>+++</sup> | y <sup>0</sup> | y <sup>0++</sup> | #  |
|----|----------|-----------------|----------------|------------------|------|-----------|-----------------|----------------|------------------|----------------|------------------|----|
| 1  | 88.0393  | 44.5233         | 70.0287        | 35.5180          | S    |           |                 |                |                  |                |                  | 11 |
| 2  | 187.1077 | 94.0575         | 169.0972       | 85.0522          | V    | 1010.4901 | 505.7487        | 993.4636       | 497.2354         | 992.4796       | 496.7434         | 10 |
| 3  | 256.1292 | 128.5682        | 238.1186       | 119.5629         | S    | 911.4217  | 456.2145        | 894.3952       | 447.7012         | 893.4112       | 447.2092         | 9  |
| 4  | 327.1663 | 164.0868        | 309.1557       | 155.0815         | A    | 842.4003  | 421.7038        | 825.3737       | 413.1905         | 824.3897       | 412.6985         | 8  |
| 5  | 414.1983 | 207.6028        | 396.1878       | 198.5975         | S    | 771.3632  | 386.1852        | 754.3366       | 377.6719         | 753.3526       | 377.1799         | 7  |
| 6  | 551.2572 | 276.1323        | 533.2467       | 267.1270         | H    | 684.3311  | 342.6692        | 667.3046       | 334.1559         | 666.3206       | 333.6639         | 6  |
| 7  | 680.2998 | 340.6536        | 662.2893       | 331.6483         | E    | 547.2722  | 274.1397        | 530.2457       | 265.6265         | 529.2617       | 265.1345         | 5  |
| 8  | 737.3213 | 369.1643        | 719.3107       | 360.1590         | G    | 418.2296  | 209.6185        | 401.2031       | 201.1052         | 400.2191       | 200.6132         | 4  |
| 9  | 852.3482 | 426.6778        | 834.3377       | 417.6725         | D    | 361.2082  | 181.1077        | 344.1816       | 172.5944         | 343.1976       | 172.1024         | 3  |
| 10 | 951.4166 | 476.2120        | 933.4061       | 467.2067         | V    | 246.1812  | 123.5942        | 229.1547       | 115.0810         |                |                  | 2  |
| 11 |          |                 |                |                  | K    | 147.1128  | 74.0600         | 130.0863       | 65.5468          |                |                  | 1  |

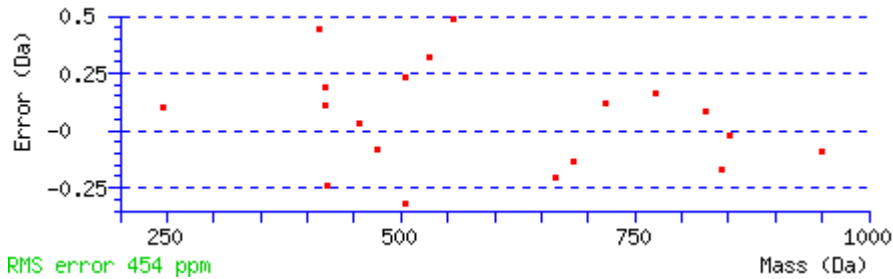

RMS error 454 ppm

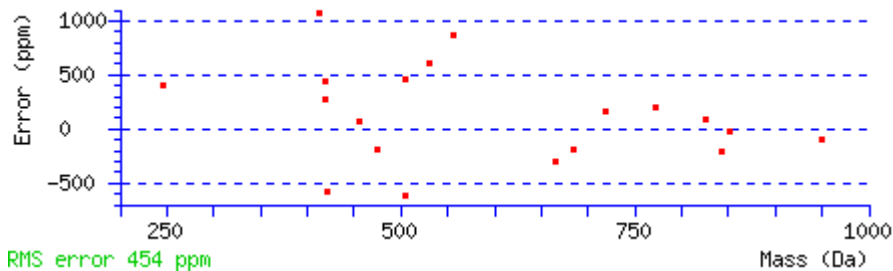

RMS error 454 ppm

IDENTIFICATION 51

MS/MS Fragmentation of **STSPAPADVAPAQEDLR**

Found in **IPI00130095**

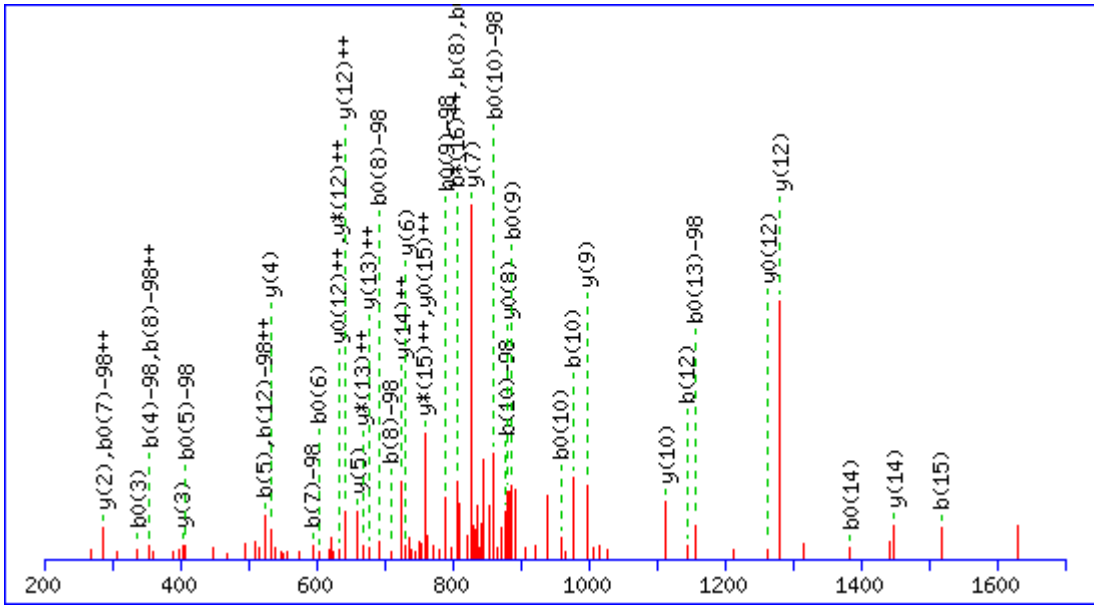

Monoisotopic mass of neutral peptide Mr(calc): 1803.8040

Fixed modifications: Carbamidomethyl (C) (apply to specified residues or termini only)

Variable modifications:

T2 : Phospho (ST), with neutral losses 0.0000(shown in table), 97.9769

Ions Score: 65 Expect: 6.1e-05 (help)

| #  | b         | b <sup>++</sup> | b <sup>*</sup> | b <sup>+++</sup> | b <sup>0</sup> | b <sup>0++</sup> | Seq. | y         | y <sup>++</sup> | y <sup>*</sup> | y <sup>+++</sup> | y <sup>0</sup> | y <sup>0++</sup> | #  |
|----|-----------|-----------------|----------------|------------------|----------------|------------------|------|-----------|-----------------|----------------|------------------|----------------|------------------|----|
| 1  | 88.0393   | 44.5233         |                |                  | 70.0287        | 35.5180          | S    |           |                 |                |                  |                |                  | 17 |
| 2  | 269.0533  | 135.0303        |                |                  | 251.0427       | 126.0250         | T    | 1717.7793 | 859.3933        | 1700.7527      | 850.8800         | 1699.7687      | 850.3880         | 16 |
| 3  | 356.0853  | 178.5463        |                |                  | 338.0748       | 169.5410         | S    | 1536.7653 | 768.8863        | 1519.7387      | 760.3730         | 1518.7547      | 759.8810         | 15 |
| 4  | 453.1381  | 227.0727        |                |                  | 435.1275       | 218.0674         | P    | 1449.7332 | 725.3703        | 1432.7067      | 716.8570         | 1431.7227      | 716.3650         | 14 |
| 5  | 524.1752  | 262.5912        |                |                  | 506.1647       | 253.5860         | A    | 1352.6805 | 676.8439        | 1335.6539      | 668.3306         | 1334.6699      | 667.8386         | 13 |
| 6  | 621.2280  | 311.1176        |                |                  | 603.2174       | 302.1123         | P    | 1281.6434 | 641.3253        | 1264.6168      | 632.8120         | 1263.6328      | 632.3200         | 12 |
| 7  | 692.2651  | 346.6362        |                |                  | 674.2545       | 337.6309         | A    | 1184.5906 | 592.7989        | 1167.5640      | 584.2857         | 1166.5800      | 583.7937         | 11 |
| 8  | 807.2920  | 404.1497        |                |                  | 789.2815       | 395.1444         | D    | 1113.5535 | 557.2804        | 1096.5269      | 548.7671         | 1095.5429      | 548.2751         | 10 |
| 9  | 906.3605  | 453.6839        |                |                  | 888.3499       | 444.6786         | V    | 998.5265  | 499.7669        | 981.5000       | 491.2536         | 980.5160       | 490.7616         | 9  |
| 10 | 977.3976  | 489.2024        |                |                  | 959.3870       | 480.1971         | A    | 899.4581  | 450.2327        | 882.4316       | 441.7194         | 881.4476       | 441.2274         | 8  |
| 11 | 1074.4503 | 537.7288        |                |                  | 1056.4398      | 528.7235         | P    | 828.4210  | 414.7141        | 811.3945       | 406.2009         | 810.4104       | 405.7089         | 7  |
| 12 | 1145.4874 | 573.2474        |                |                  | 1127.4769      | 564.2421         | A    | 731.3682  | 366.1878        | 714.3417       | 357.6745         | 713.3577       | 357.1825         | 6  |
| 13 | 1273.5460 | 637.2767        | 1256.5195      | 628.7634         | 1255.5355      | 628.2714         | Q    | 660.3311  | 330.6692        | 643.3046       | 322.1559         | 642.3206       | 321.6639         | 5  |
| 14 | 1402.5886 | 701.7979        | 1385.5621      | 693.2847         | 1384.5781      | 692.7927         | E    | 532.2726  | 266.6399        | 515.2460       | 258.1266         | 514.2620       | 257.6346         | 4  |
| 15 | 1517.6156 | 759.3114        | 1500.5890      | 750.7981         | 1499.6050      | 750.3061         | D    | 403.2300  | 202.1186        | 386.2034       | 193.6053         | 385.2194       | 193.1133         | 3  |
| 16 | 1630.6996 | 815.8535        | 1613.6731      | 807.3402         | 1612.6891      | 806.8482         | L    | 288.2030  | 144.6051        | 271.1765       | 136.0919         |                |                  | 2  |
| 17 |           |                 |                |                  |                |                  | R    | 175.1190  | 88.0631         | 158.0924       | 79.5498          |                |                  | 1  |

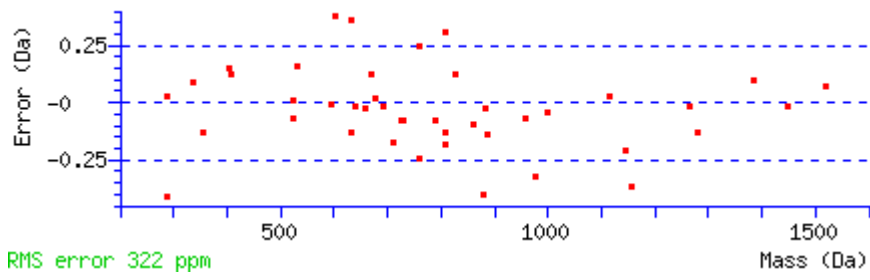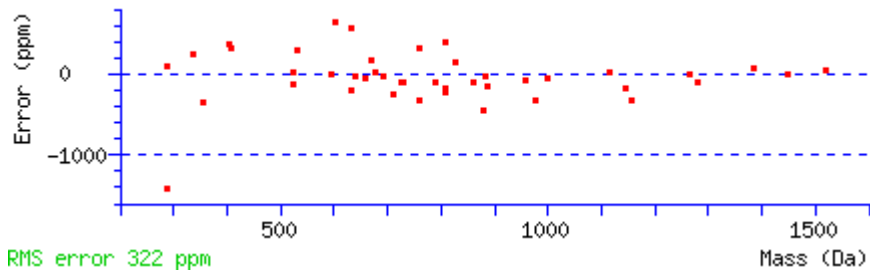

IDENTIFICATION 52

MS/MS Fragmentation of **KAASPQSVR**

Found in **IPI00118438**

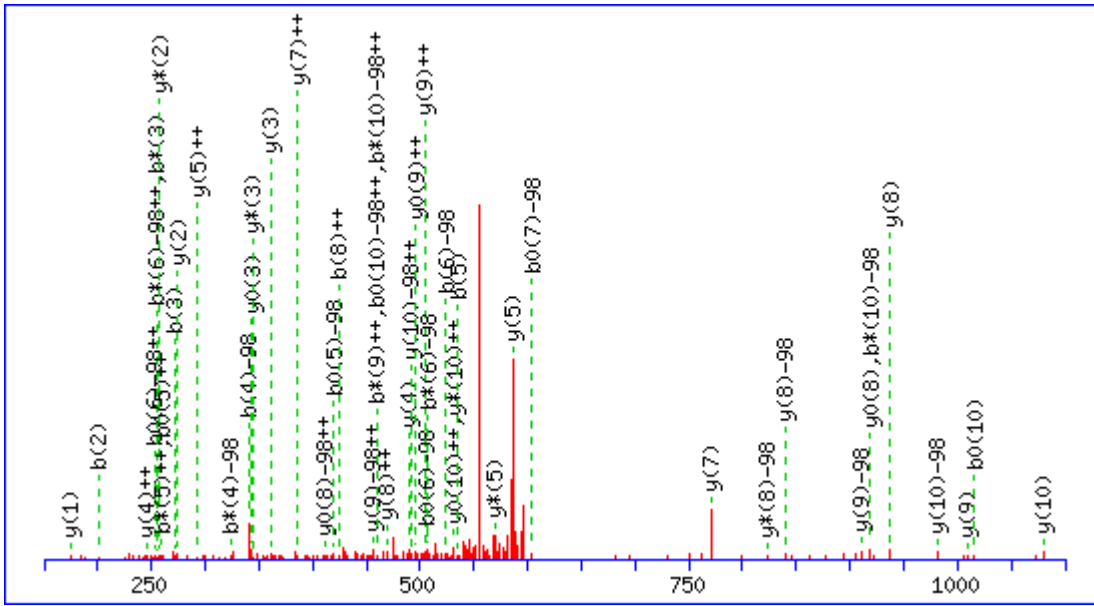

Monoisotopic mass of neutral peptide  $M_r(\text{calc})$ : 1206.5758

Fixed modifications: Carbamidomethyl (C) (apply to specified residues or termini only)

Variable modifications:

S4 : Phospho (ST), with neutral losses 97.9769 (shown in table), 0.0000

Ions Score: 30 Expect: 0.11 (help)

| #  | b        | b <sup>++</sup> | b <sup>*</sup> | b <sup>+++</sup> | b <sup>0</sup> | b <sup>0++</sup> | Seq. | y        | y <sup>++</sup> | y <sup>*</sup> | y <sup>+++</sup> | y <sup>0</sup> | y <sup>0++</sup> | #  |
|----|----------|-----------------|----------------|------------------|----------------|------------------|------|----------|-----------------|----------------|------------------|----------------|------------------|----|
| 1  | 129.1022 | 65.0548         | 112.0757       | 56.5415          |                |                  | K    |          |                 |                |                  |                |                  | 11 |
| 2  | 200.1394 | 100.5733        | 183.1128       | 92.0600          |                |                  | A    | 981.5112 | 491.2592        | 964.4847       | 482.7460         | 963.5007       | 482.2540         | 10 |
| 3  | 271.1765 | 136.0919        | 254.1499       | 127.5786         |                |                  | A    | 910.4741 | 455.7407        | 893.4476       | 447.2274         | 892.4635       | 446.7354         | 9  |
| 4  | 340.1979 | 170.6026        | 323.1714       | 162.0893         | 322.1874       | 161.5973         | S    | 839.4370 | 420.2221        | 822.4104       | 411.7089         | 821.4264       | 411.2169         | 8  |
| 5  | 437.2507 | 219.1290        | 420.2241       | 210.6157         | 419.2401       | 210.1237         | P    | 770.4155 | 385.7114        | 753.3890       | 377.1981         | 752.4050       | 376.7061         | 7  |
| 6  | 524.2827 | 262.6450        | 507.2562       | 254.1317         | 506.2722       | 253.6397         | S    | 673.3628 | 337.1850        | 656.3362       | 328.6717         | 655.3522       | 328.1797         | 6  |
| 7  | 621.3355 | 311.1714        | 604.3089       | 302.6581         | 603.3249       | 302.1661         | P    | 586.3307 | 293.6690        | 569.3042       | 285.1557         | 568.3202       | 284.6637         | 5  |
| 8  | 749.3941 | 375.2007        | 732.3675       | 366.6874         | 731.3835       | 366.1954         | Q    | 489.2780 | 245.1426        | 472.2514       | 236.6293         | 471.2674       | 236.1373         | 4  |
| 9  | 836.4261 | 418.7167        | 819.3995       | 410.2034         | 818.4155       | 409.7114         | S    | 361.2194 | 181.1133        | 344.1928       | 172.6001         | 343.2088       | 172.1081         | 3  |
| 10 | 935.4945 | 468.2509        | 918.4680       | 459.7376         | 917.4839       | 459.2456         | V    | 274.1874 | 137.5973        | 257.1608       | 129.0840         |                |                  | 2  |
| 11 |          |                 |                |                  |                |                  | R    | 175.1190 | 88.0631         | 158.0924       | 79.5498          |                |                  | 1  |

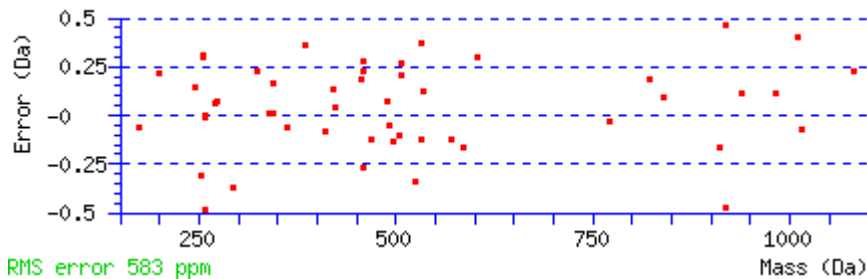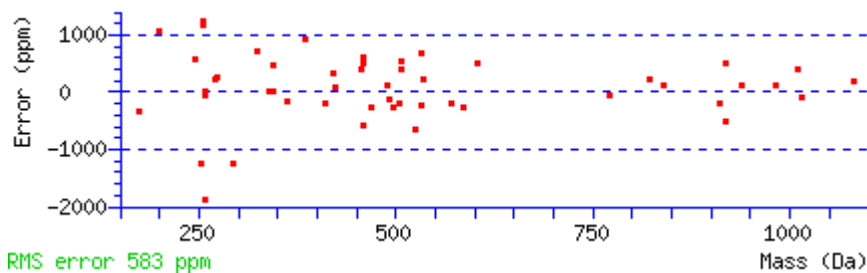

IDENTIFICATION 53

MS/MS Fragmentation of **CGSGPVIHSQQLVAVEEDAEEDEEDVVK**

Found in **IPI00127415**

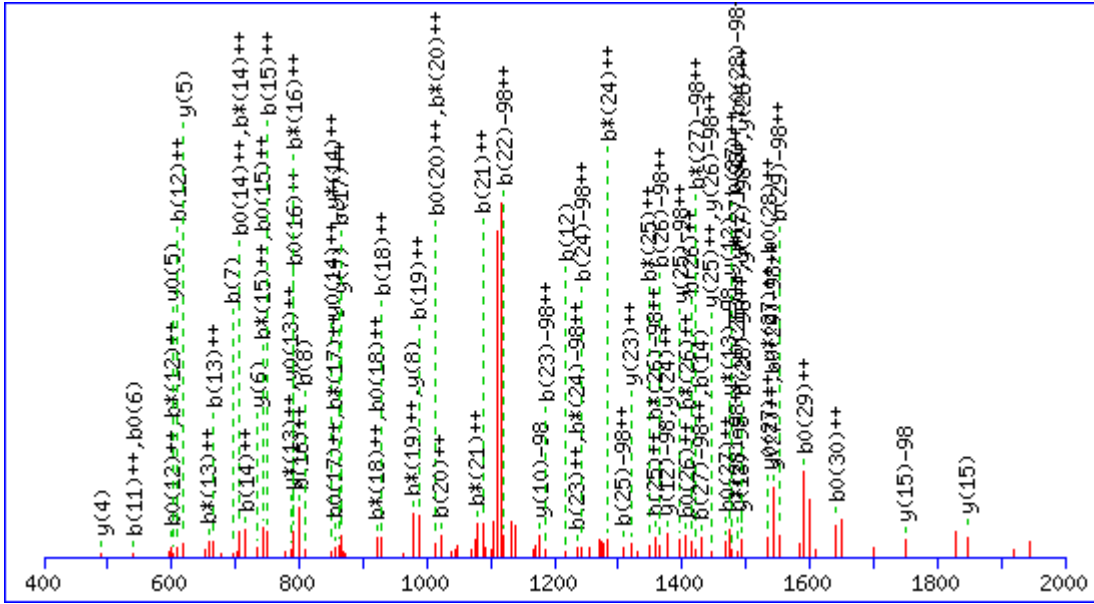

Monoisotopic mass of neutral peptide Mr(calc): 3445.4141

Fixed modifications: Carbamidomethyl (C) (apply to specified residues or termini only)

Variable modifications:

S22 : Phospho (ST), with neutral losses 97.9769 (shown in table), 0.0000

Ions Score: 97 Expect: 5.4e-08 (help)

| #  | b         | b <sup>++</sup> | b <sup>*</sup> | b <sup>+++</sup> | b <sup>0</sup> | b <sup>0++</sup> | Seq. | y         | y <sup>++</sup> | y <sup>*</sup> | y <sup>+++</sup> | y <sup>0</sup> | y <sup>0++</sup> | #  |
|----|-----------|-----------------|----------------|------------------|----------------|------------------|------|-----------|-----------------|----------------|------------------|----------------|------------------|----|
| 1  | 161.0379  | 81.0226         |                |                  |                |                  | C    |           |                 |                |                  |                |                  | 31 |
| 2  | 218.0594  | 109.5333        |                |                  |                |                  | G    | 3188.4138 | 1594.7105       | 3171.3873      | 1586.1973        | 3170.4033      | 1585.7053        | 30 |
| 3  | 305.0914  | 153.0493        |                |                  | 287.0809       | 144.0441         | S    | 3131.3924 | 1566.1998       | 3114.3658      | 1557.6865        | 3113.3818      | 1557.1945        | 29 |
| 4  | 362.1129  | 181.5601        |                |                  | 344.1023       | 172.5548         | G    | 3044.3603 | 1522.6838       | 3027.3338      | 1514.1705        | 3026.3498      | 1513.6785        | 28 |
| 5  | 459.1656  | 230.0865        |                |                  | 441.1551       | 221.0812         | P    | 2987.3389 | 1494.1731       | 2970.3123      | 1485.6598        | 2969.3283      | 1485.1678        | 27 |
| 6  | 558.2341  | 279.6207        |                |                  | 540.2235       | 270.6154         | V    | 2890.2861 | 1445.6467       | 2873.2595      | 1437.1334        | 2872.2755      | 1436.6414        | 26 |
| 7  | 695.2930  | 348.1501        |                |                  | 677.2824       | 339.1448         | H    | 2791.2177 | 1396.1125       | 2774.1911      | 1387.5992        | 2773.2071      | 1387.1072        | 25 |
| 8  | 808.3770  | 404.6922        |                |                  | 790.3665       | 395.6869         | I    | 2654.1588 | 1327.5830       | 2637.1322      | 1319.0697        | 2636.1482      | 1318.5777        | 24 |
| 9  | 895.4091  | 448.2082        |                |                  | 877.3985       | 439.2029         | S    | 2541.0747 | 1271.0410       | 2524.0482      | 1262.5277        | 2523.0641      | 1262.0357        | 23 |
| 10 | 952.4305  | 476.7189        |                |                  | 934.4200       | 467.7136         | G    | 2454.0427 | 1227.5250       | 2437.0161      | 1219.0117        | 2436.0321      | 1218.5197        | 22 |
| 11 | 1080.4891 | 540.7482        | 1063.4626      | 532.2349         | 1062.4785      | 531.7429         | Q    | 2397.0212 | 1199.0142       | 2379.9947      | 1190.5010        | 2379.0106      | 1190.0090        | 21 |
| 12 | 1217.5480 | 609.2776        | 1200.5215      | 600.7644         | 1199.5375      | 600.2724         | H    | 2268.9626 | 1134.9850       | 2251.9361      | 1126.4717        | 2250.9521      | 1125.9797        | 20 |
| 13 | 1330.6321 | 665.8197        | 1313.6055      | 657.3064         | 1312.6215      | 656.8144         | L    | 2131.9037 | 1066.4555       | 2114.8772      | 1057.9422        | 2113.8932      | 1057.4502        | 19 |
| 14 | 1429.7005 | 715.3539        | 1412.6739      | 706.8406         | 1411.6899      | 706.3486         | V    | 2018.8197 | 1009.9135       | 2001.7931      | 1001.4002        | 2000.8091      | 1000.9082        | 18 |
| 15 | 1500.7376 | 750.8724        | 1483.7111      | 742.3592         | 1482.7270      | 741.8672         | A    | 1919.7512 | 960.3793        | 1902.7247      | 951.8660         | 1901.7407      | 951.3740         | 17 |
| 16 | 1599.8060 | 800.4066        | 1582.7795      | 791.8934         | 1581.7955      | 791.4014         | V    | 1848.7141 | 924.8607        | 1831.6876      | 916.3474         | 1830.7036      | 915.8554         | 16 |
| 17 | 1728.8486 | 864.9279        | 1711.8221      | 856.4147         | 1710.8381      | 855.9227         | E    | 1749.6457 | 875.3265        | 1732.6192      | 866.8132         | 1731.6352      | 866.3212         | 15 |
| 18 | 1857.8912 | 929.4492        | 1840.8647      | 920.9360         | 1839.8806      | 920.4440         | E    | 1620.6031 | 810.8052        | 1603.5766      | 802.2919         | 1602.5926      | 801.7999         | 14 |
| 19 | 1972.9182 | 986.9627        | 1955.8916      | 978.4494         | 1954.9076      | 977.9574         | D    | 1491.5605 | 746.2839        | 1474.5340      | 737.7706         | 1473.5500      | 737.2786         | 13 |
| 20 | 2043.9553 | 1022.4813       | 2026.9287      | 1013.9680        | 2025.9447      | 1013.4760        | A    | 1376.5336 | 688.7704        | 1359.5070      | 680.2572         | 1358.5230      | 679.7652         | 12 |
| 21 | 2172.9979 | 1087.0026       | 2155.9713      | 1078.4893        | 2154.9873      | 1077.9973        | E    | 1305.4965 | 653.2519        | 1288.4699      | 644.7386         | 1287.4859      | 644.2466         | 11 |
| 22 | 2242.0193 | 1121.5133       | 2224.9928      | 1113.0000        | 2224.0088      | 1112.5080        | S    | 1176.4539 | 588.7306        | 1159.4273      | 580.2173         | 1158.4433      | 579.7253         | 10 |
| 23 | 2371.0619 | 1186.0346       | 2354.0354      | 1177.5213        | 2353.0514      | 1177.0293        | E    | 1107.4324 | 554.2198        | 1090.4059      | 545.7066         | 1089.4219      | 545.2146         | 9  |
| 24 | 2486.0889 | 1243.5481       | 2469.0623      | 1235.0348        | 2468.0783      | 1234.5428        | D    | 978.3898  | 489.6986        | 961.3633       | 481.1853         | 960.3793       | 480.6933         | 8  |
| 25 | 2615.1315 | 1308.0694       | 2598.1049      | 1299.5561        | 2597.1209      | 1299.0641        | E    | 863.3629  | 432.1851        | 846.3363       | 423.6718         | 845.3523       | 423.1798         | 7  |
| 26 | 2730.1584 | 1365.5828       | 2713.1318      | 1357.0696        | 2712.1478      | 1356.5776        | D    | 734.3203  | 367.6638        | 717.2937       | 359.1505         | 716.3097       | 358.6585         | 6  |
| 27 | 2859.2010 | 1430.1041       | 2842.1744      | 1421.5909        | 2841.1904      | 1421.0988        | E    | 619.2933  | 310.1503        | 602.2668       | 301.6370         | 601.2828       | 301.1450         | 5  |

|    |           |           |           |           |           |           |   |          |          |          |          |          |          |   |
|----|-----------|-----------|-----------|-----------|-----------|-----------|---|----------|----------|----------|----------|----------|----------|---|
| 28 | 2988.2436 | 1494.6254 | 2971.2170 | 1486.1122 | 2970.2330 | 1485.6201 | E | 490.2508 | 245.6290 | 473.2242 | 237.1157 | 472.2402 | 236.6237 | 4 |
| 29 | 3103.2705 | 1552.1389 | 3086.2440 | 1543.6256 | 3085.2600 | 1543.1336 | D | 361.2082 | 181.1077 | 344.1816 | 172.5944 | 343.1976 | 172.1024 | 3 |
| 30 | 3202.3389 | 1601.6731 | 3185.3124 | 1593.1598 | 3184.3284 | 1592.6678 | V | 246.1812 | 123.5942 | 229.1547 | 115.0810 |          |          | 2 |
| 31 |           |           |           |           |           |           | K | 147.1128 | 74.0600  | 130.0863 | 65.5468  |          |          | 1 |

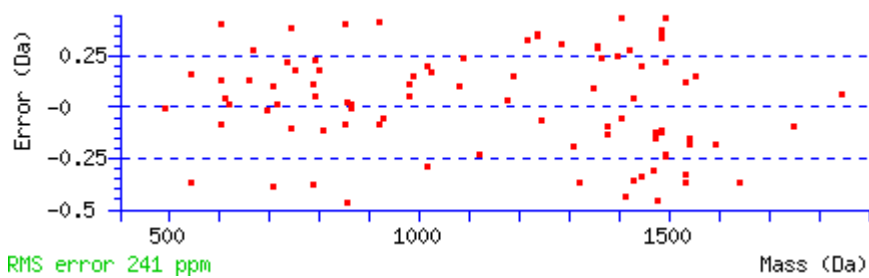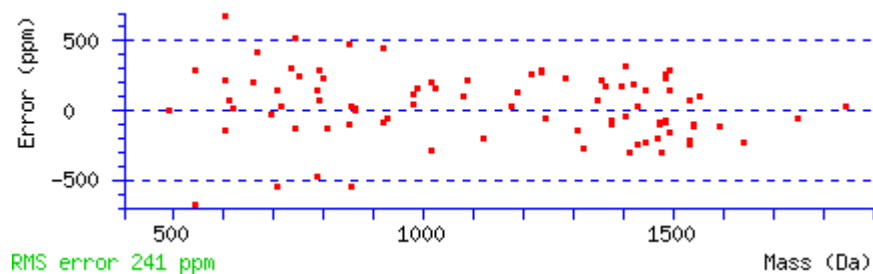

MS/MS Fragmentation of **VEMGTSSQNDVDMSWIPQETLNQINKASPR**  
 Found in **IPI00755329**

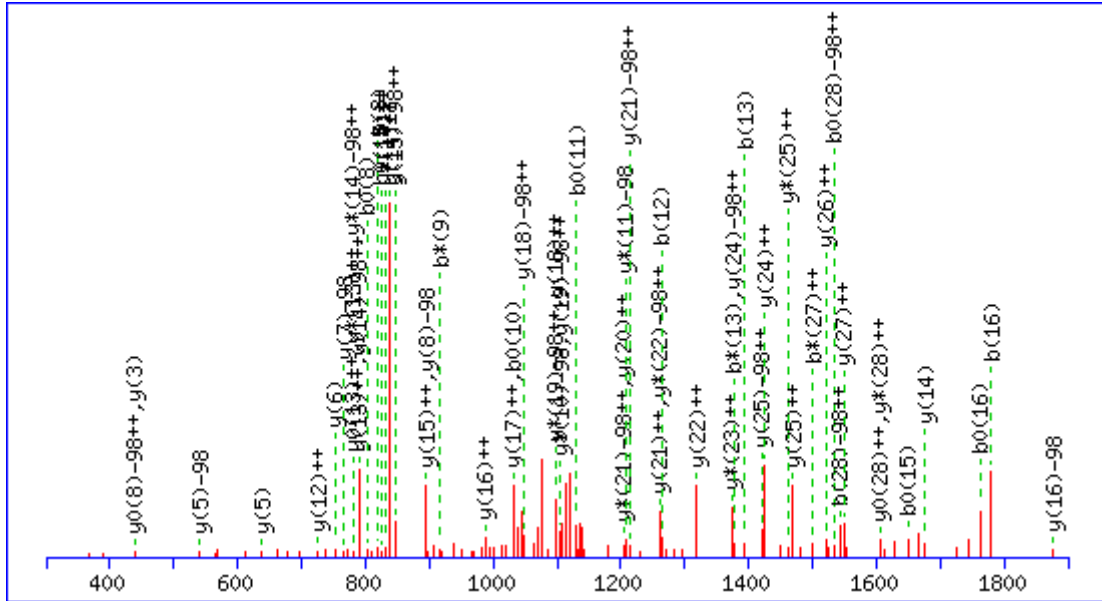

Monoisotopic mass of neutral peptide Mr(calc): 3454.5534

Fixed modifications: Carbamidomethyl (C) (apply to specified residues or termini only)

Variable modifications:

S28 : Phospho (ST), with neutral losses 0.0000 (shown in table), 97.9769

Ions Score: 62 Expect: 0.00015 (help)

| #  | b         | b <sup>++</sup> | b <sup>*</sup> | b <sup>+++</sup> | b <sup>0</sup> | b <sup>0++</sup> | Seq. | y         | y <sup>++</sup> | y <sup>*</sup> | y <sup>+++</sup> | y <sup>0</sup> | y <sup>0++</sup> | #  |
|----|-----------|-----------------|----------------|------------------|----------------|------------------|------|-----------|-----------------|----------------|------------------|----------------|------------------|----|
| 1  | 100.0757  | 50.5415         |                |                  |                |                  | V    |           |                 |                |                  |                |                  | 30 |
| 2  | 229.1183  | 115.0628        |                |                  | 211.1077       | 106.0575         | E    | 3356.4923 | 1678.7498       | 3339.4657      | 1670.2365        | 3338.4817      | 1669.7445        | 29 |
| 3  | 360.1588  | 180.5830        |                |                  | 342.1482       | 171.5777         | M    | 3227.4497 | 1614.2285       | 3210.4232      | 1605.7152        | 3209.4391      | 1605.2232        | 28 |
| 4  | 417.1802  | 209.0938        |                |                  | 399.1697       | 200.0885         | G    | 3096.4092 | 1548.7082       | 3079.3827      | 1540.1950        | 3078.3987      | 1539.7030        | 27 |
| 5  | 518.2279  | 259.6176        |                |                  | 500.2173       | 250.6123         | T    | 3039.3878 | 1520.1975       | 3022.3612      | 1511.6842        | 3021.3772      | 1511.1922        | 26 |
| 6  | 605.2599  | 303.1336        |                |                  | 587.2494       | 294.1283         | S    | 2938.3401 | 1469.6737       | 2921.3135      | 1461.1604        | 2920.3295      | 1460.6684        | 25 |
| 7  | 692.2920  | 346.6496        |                |                  | 674.2814       | 337.6443         | S    | 2851.3080 | 1426.1577       | 2834.2815      | 1417.6444        | 2833.2975      | 1417.1524        | 24 |
| 8  | 820.3505  | 410.6789        | 803.3240       | 402.1656         | 802.3400       | 401.6736         | Q    | 2764.2760 | 1382.6416       | 2747.2495      | 1374.1284        | 2746.2655      | 1373.6364        | 23 |
| 9  | 934.3935  | 467.7004        | 917.3669       | 459.1871         | 916.3829       | 458.6951         | N    | 2636.2174 | 1318.6124       | 2619.1909      | 1310.0991        | 2618.2069      | 1309.6071        | 22 |
| 10 | 1049.4204 | 525.2138        | 1032.3939      | 516.7006         | 1031.4099      | 516.2086         | D    | 2522.1745 | 1261.5909       | 2505.1480      | 1253.0776        | 2504.1640      | 1252.5856        | 21 |
| 11 | 1148.4888 | 574.7481        | 1131.4623      | 566.2348         | 1130.4783      | 565.7428         | V    | 2407.1476 | 1204.0774       | 2390.1210      | 1195.5641        | 2389.1370      | 1195.0721        | 20 |
| 12 | 1263.5158 | 632.2615        | 1246.4892      | 623.7482         | 1245.5052      | 623.2562         | D    | 2308.0792 | 1154.5432       | 2291.0526      | 1146.0299        | 2290.0686      | 1145.5379        | 19 |
| 13 | 1394.5563 | 697.7818        | 1377.5297      | 689.2685         | 1376.5457      | 688.7765         | M    | 2193.0522 | 1097.0297       | 2176.0257      | 1088.5165        | 2175.0417      | 1088.0245        | 18 |
| 14 | 1481.5883 | 741.2978        | 1464.5617      | 732.7845         | 1463.5777      | 732.2925         | S    | 2062.0117 | 1031.5095       | 2044.9852      | 1022.9962        | 2044.0012      | 1022.5042        | 17 |
| 15 | 1667.6676 | 834.3374        | 1650.6410      | 825.8242         | 1649.6570      | 825.3322         | W    | 1974.9797 | 987.9935        | 1957.9532      | 979.4802         | 1956.9691      | 978.9882         | 16 |
| 16 | 1780.7517 | 890.8795        | 1763.7251      | 882.3662         | 1762.7411      | 881.8742         | I    | 1788.9004 | 894.9538        | 1771.8738      | 886.4406         | 1770.8898      | 885.9486         | 15 |
| 17 | 1877.8044 | 939.4059        | 1860.7779      | 930.8926         | 1859.7939      | 930.4006         | P    | 1675.8163 | 838.4118        | 1658.7898      | 829.8985         | 1657.8058      | 829.4065         | 14 |
| 18 | 2005.8630 | 1003.4351       | 1988.8365      | 994.9219         | 1987.8524      | 994.4299         | Q    | 1578.7636 | 789.8854        | 1561.7370      | 781.3721         | 1560.7530      | 780.8801         | 13 |
| 19 | 2134.9056 | 1067.9564       | 2117.8790      | 1059.4432        | 2116.8950      | 1058.9512        | E    | 1450.7050 | 725.8561        | 1433.6784      | 717.3429         | 1432.6944      | 716.8508         | 12 |
| 20 | 2235.9533 | 1118.4803       | 2218.9267      | 1109.9670        | 2217.9427      | 1109.4750        | T    | 1321.6624 | 661.3348        | 1304.6358      | 652.8216         | 1303.6518      | 652.3296         | 11 |
| 21 | 2349.0373 | 1175.0223       | 2332.0108      | 1166.5090        | 2331.0268      | 1166.0170        | L    | 1220.6147 | 610.8110        | 1203.5882      | 602.2977         | 1202.6041      | 601.8057         | 10 |
| 22 | 2463.0803 | 1232.0438       | 2446.0537      | 1223.5305        | 2445.0697      | 1223.0385        | N    | 1107.5306 | 554.2690        | 1090.5041      | 545.7557         | 1089.5201      | 545.2637         | 9  |
| 23 | 2591.1388 | 1296.0731       | 2574.1123      | 1287.5598        | 2573.1283      | 1287.0678        | Q    | 993.4877  | 497.2475        | 976.4612       | 488.7342         | 975.4772       | 488.2422         | 8  |
| 24 | 2704.2229 | 1352.6151       | 2687.1964      | 1344.1018        | 2686.2123      | 1343.6098        | I    | 865.4291  | 433.2182        | 848.4026       | 424.7049         | 847.4186       | 424.2129         | 7  |
| 25 | 2818.2658 | 1409.6366       | 2801.2393      | 1401.1233        | 2800.2553      | 1400.6313        | N    | 752.3451  | 376.6762        | 735.3185       | 368.1629         | 734.3345       | 367.6709         | 6  |
| 26 | 2946.3608 | 1473.6840       | 2929.3342      | 1465.1708        | 2928.3502      | 1464.6788        | K    | 638.3022  | 319.6547        | 621.2756       | 311.1414         | 620.2916       | 310.6494         | 5  |

|    |           |           |           |           |           |           |   |          |          |          |          |          |          |   |
|----|-----------|-----------|-----------|-----------|-----------|-----------|---|----------|----------|----------|----------|----------|----------|---|
| 27 | 3017.3979 | 1509.2026 | 3000.3714 | 1500.6893 | 2999.3873 | 1500.1973 | A | 510.2072 | 255.6072 | 493.1806 | 247.0940 | 492.1966 | 246.6020 | 4 |
| 28 | 3184.3963 | 1592.7018 | 3167.3697 | 1584.1885 | 3166.3857 | 1583.6965 | S | 439.1701 | 220.0887 | 422.1435 | 211.5754 | 421.1595 | 211.0834 | 3 |
| 29 | 3281.4490 | 1641.2282 | 3264.4225 | 1632.7149 | 3263.4385 | 1632.2229 | P | 272.1717 | 136.5895 | 255.1452 | 128.0762 |          |          | 2 |
| 30 |           |           |           |           |           |           | R | 175.1190 | 88.0631  | 158.0924 | 79.5498  |          |          | 1 |

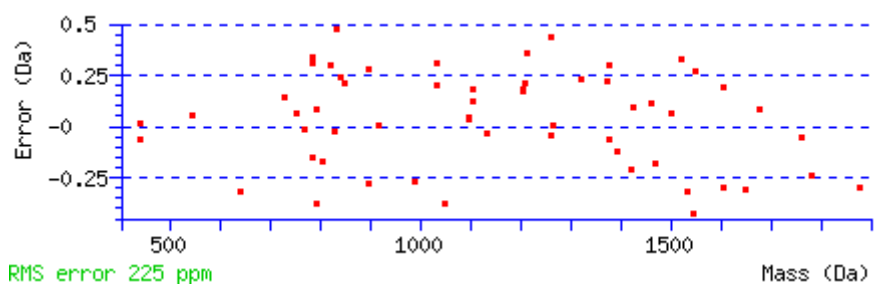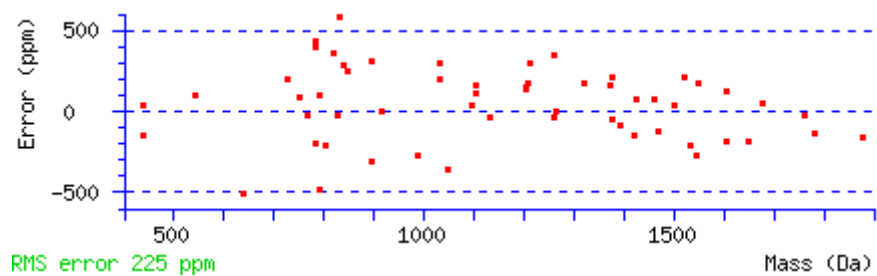



IDENTIFICATION 55

MS/MS Fragmentation of SATPPPAEASLPQEPPKPR

Found in IPI00331295

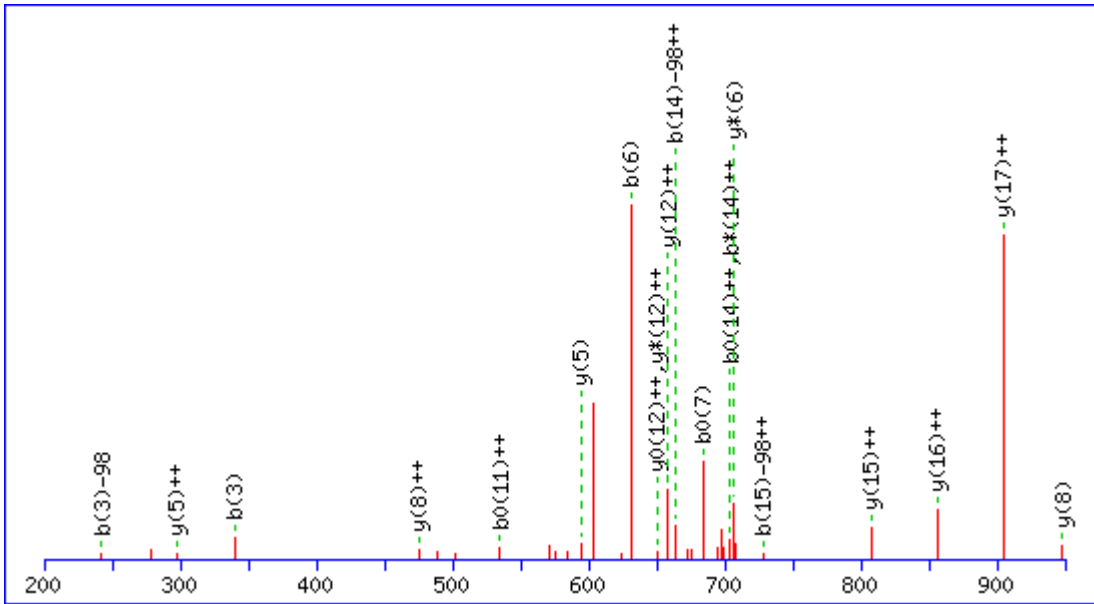

Monoisotopic mass of neutral peptide Mr(calc): 2146.0459 Fixed modifications: Carbamidomethyl (C) (apply to specified residues or termini only) Variable modifications: T3 : Phospho (ST), with neutral losses 0.0000 (shown in table), 97.9769 Ions Score: 38 Expect: 0.019 (help)

| #  | b         | b <sup>++</sup> | b <sup>*</sup> | b <sup>+++</sup> | b <sup>0</sup> | b <sup>0++</sup> | Seq. | y         | y <sup>++</sup> | y <sup>*</sup> | y <sup>+++</sup> | y <sup>0</sup> | y <sup>0++</sup> | #  |
|----|-----------|-----------------|----------------|------------------|----------------|------------------|------|-----------|-----------------|----------------|------------------|----------------|------------------|----|
| 1  | 88.0393   | 44.5233         |                |                  | 70.0287        | 35.5180          | S    |           |                 |                |                  |                |                  | 20 |
| 2  | 159.0764  | 80.0418         |                |                  | 141.0659       | 71.0366          | A    | 2060.0212 | 1030.5143       | 2042.9947      | 1022.0010        | 2042.0107      | 1021.5090        | 19 |
| 3  | 340.0904  | 170.5489        |                |                  | 322.0799       | 161.5436         | T    | 1988.9841 | 994.9957        | 1971.9576      | 986.4824         | 1970.9736      | 985.9904         | 18 |
| 4  | 437.1432  | 219.0752        |                |                  | 419.1326       | 210.0700         | P    | 1807.9701 | 904.4887        | 1790.9436      | 895.9754         | 1789.9595      | 895.4834         | 17 |
| 5  | 534.1960  | 267.6016        |                |                  | 516.1854       | 258.5963         | P    | 1710.9173 | 855.9623        | 1693.8908      | 847.4490         | 1692.9068      | 846.9570         | 16 |
| 6  | 631.2487  | 316.1280        |                |                  | 613.2382       | 307.1227         | P    | 1613.8646 | 807.4359        | 1596.8380      | 798.9227         | 1595.8540      | 798.4306         | 15 |
| 7  | 702.2858  | 351.6466        |                |                  | 684.2753       | 342.6413         | A    | 1516.8118 | 758.9095        | 1499.7853      | 750.3963         | 1498.8013      | 749.9043         | 14 |
| 8  | 831.3284  | 416.1679        |                |                  | 813.3179       | 407.1626         | E    | 1445.7747 | 723.3910        | 1428.7482      | 714.8777         | 1427.7641      | 714.3857         | 13 |
| 9  | 928.3812  | 464.6942        |                |                  | 910.3706       | 455.6890         | P    | 1316.7321 | 658.8697        | 1299.7056      | 650.3564         | 1298.7215      | 649.8644         | 12 |
| 10 | 999.4183  | 500.2128        |                |                  | 981.4077       | 491.2075         | A    | 1219.6793 | 610.3433        | 1202.6528      | 601.8300         | 1201.6688      | 601.3380         | 11 |
| 11 | 1086.4503 | 543.7288        |                |                  | 1068.4398      | 534.7235         | S    | 1148.6422 | 574.8248        | 1131.6157      | 566.3115         | 1130.6317      | 565.8195         | 10 |
| 12 | 1199.5344 | 600.2708        |                |                  | 1181.5238      | 591.2656         | L    | 1061.6102 | 531.3087        | 1044.5837      | 522.7955         | 1043.5996      | 522.3035         | 9  |
| 13 | 1296.5872 | 648.7972        |                |                  | 1278.5766      | 639.7919         | P    | 948.5261  | 474.7667        | 931.4996       | 466.2534         | 930.5156       | 465.7614         | 8  |
| 14 | 1424.6457 | 712.8265        | 1407.6192      | 704.3132         | 1406.6352      | 703.8212         | Q    | 851.4734  | 426.2403        | 834.4468       | 417.7271         | 833.4628       | 417.2350         | 7  |
| 15 | 1553.6883 | 777.3478        | 1536.6618      | 768.8345         | 1535.6778      | 768.3425         | E    | 723.4148  | 362.2110        | 706.3883       | 353.6978         | 705.4042       | 353.2058         | 6  |
| 16 | 1650.7411 | 825.8742        | 1633.7145      | 817.3609         | 1632.7305      | 816.8689         | P    | 594.3722  | 297.6897        | 577.3457       | 289.1765         |                |                  | 5  |
| 17 | 1747.7939 | 874.4006        | 1730.7673      | 865.8873         | 1729.7833      | 865.3953         | P    | 497.3194  | 249.1634        | 480.2929       | 240.6501         |                |                  | 4  |
| 18 | 1875.8888 | 938.4480        | 1858.8623      | 929.9348         | 1857.8783      | 929.4428         | K    | 400.2667  | 200.6370        | 383.2401       | 192.1237         |                |                  | 3  |
| 19 | 1972.9416 | 986.9744        | 1955.9150      | 978.4612         | 1954.9310      | 977.9691         | P    | 272.1717  | 136.5895        | 255.1452       | 128.0762         |                |                  | 2  |
| 20 |           |                 |                |                  |                |                  | R    | 175.1190  | 88.0631         | 158.0924       | 79.5498          |                |                  | 1  |

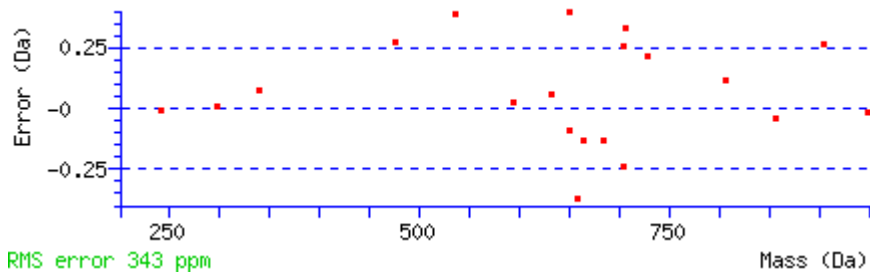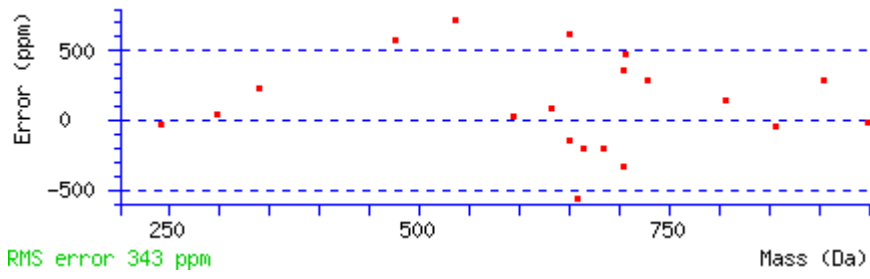

IDENTIFICATION 56  
MS/MS Fragmentation of

PGPTPSGTNVGSSGRSPSK

Found in IPI00133030

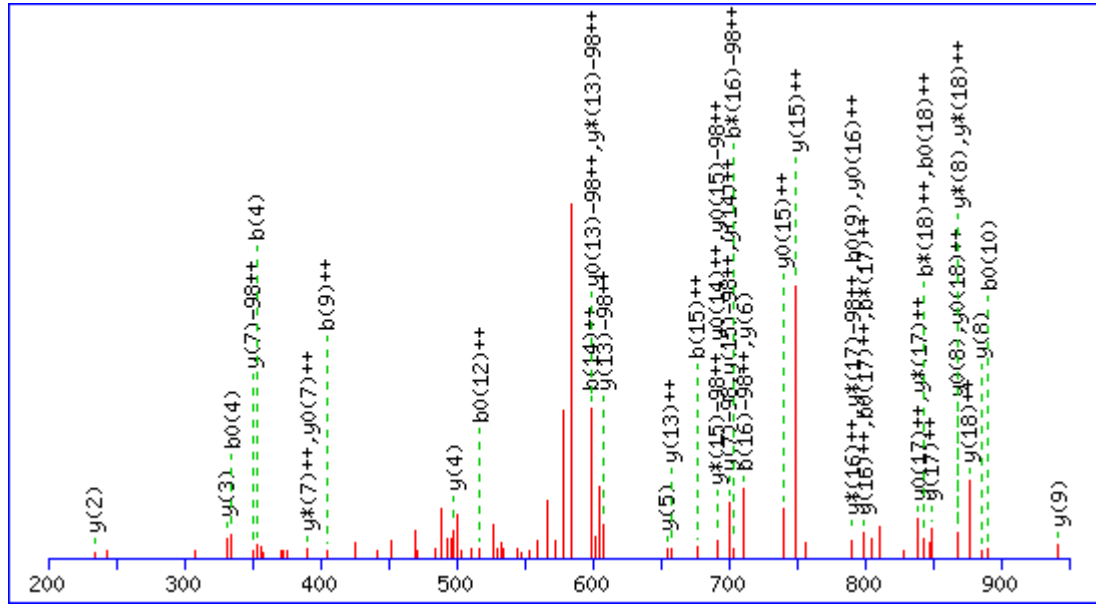

Monoisotopic mass of neutral peptide Mr(calc): 1848.8367 Fixed modifications: Carbamidomethyl (C) (apply to specified residues or termini only) Variable modifications: S16 : Phospho (ST), with neutral losses 0.0000(shown in table), 97.9769 Ions Score: 38 Expect: 0.028 (help)

| #  | b         | b <sup>++</sup> | b <sup>*</sup> | b <sup>+++</sup> | b <sup>0</sup> | b <sup>0++</sup> | Seq. | y         | y <sup>++</sup> | y <sup>*</sup> | y <sup>+++</sup> | y <sup>0</sup> | y <sup>0++</sup> | #  |
|----|-----------|-----------------|----------------|------------------|----------------|------------------|------|-----------|-----------------|----------------|------------------|----------------|------------------|----|
| 1  | 98.0600   | 49.5337         |                |                  |                |                  | P    |           |                 |                |                  |                |                  | 19 |
| 2  | 155.0815  | 78.0444         |                |                  |                |                  | G    | 1752.7912 | 876.8993        | 1735.7647      | 868.3860         | 1734.7807      | 867.8940         | 18 |
| 3  | 252.1343  | 126.5708        |                |                  |                |                  | P    | 1695.7698 | 848.3885        | 1678.7432      | 839.8752         | 1677.7592      | 839.3832         | 17 |
| 4  | 353.1819  | 177.0946        |                |                  | 335.1714       | 168.0893         | T    | 1598.7170 | 799.8621        | 1581.6905      | 791.3489         | 1580.7064      | 790.8569         | 16 |
| 5  | 450.2347  | 225.6210        |                |                  | 432.2241       | 216.6157         | P    | 1497.6693 | 749.3383        | 1480.6428      | 740.8250         | 1479.6588      | 740.3330         | 15 |
| 6  | 537.2667  | 269.1370        |                |                  | 519.2562       | 260.1317         | S    | 1400.6166 | 700.8119        | 1383.5900      | 692.2986         | 1382.6060      | 691.8066         | 14 |
| 7  | 594.2882  | 297.6477        |                |                  | 576.2776       | 288.6425         | G    | 1313.5845 | 657.2959        | 1296.5580      | 648.7826         | 1295.5740      | 648.2906         | 13 |
| 8  | 695.3359  | 348.1716        |                |                  | 677.3253       | 339.1663         | T    | 1256.5631 | 628.7852        | 1239.5365      | 620.2719         | 1238.5525      | 619.7799         | 12 |
| 9  | 809.3788  | 405.1930        | 792.3523       | 396.6798         | 791.3682       | 396.1878         | N    | 1155.5154 | 578.2613        | 1138.4888      | 569.7481         | 1137.5048      | 569.2561         | 11 |
| 10 | 908.4472  | 454.7272        | 891.4207       | 446.2140         | 890.4367       | 445.7220         | V    | 1041.4725 | 521.2399        | 1024.4459      | 512.7266         | 1023.4619      | 512.2346         | 10 |
| 11 | 965.4687  | 483.2380        | 948.4421       | 474.7247         | 947.4581       | 474.2327         | G    | 942.4041  | 471.7057        | 925.3775       | 463.1924         | 924.3935       | 462.7004         | 9  |
| 12 | 1052.5007 | 526.7540        | 1035.4742      | 518.2407         | 1034.4902      | 517.7487         | S    | 885.3826  | 443.1949        | 868.3560       | 434.6817         | 867.3720       | 434.1896         | 8  |
| 13 | 1139.5327 | 570.2700        | 1122.5062      | 561.7567         | 1121.5222      | 561.2647         | S    | 798.3506  | 399.6789        | 781.3240       | 391.1656         | 780.3400       | 390.6736         | 7  |
| 14 | 1196.5542 | 598.7807        | 1179.5277      | 590.2675         | 1178.5436      | 589.7755         | G    | 711.3185  | 356.1629        | 694.2920       | 347.6496         | 693.3080       | 347.1576         | 6  |
| 15 | 1352.6553 | 676.8313        | 1335.6288      | 668.3180         | 1334.6448      | 667.8260         | R    | 654.2971  | 327.6522        | 637.2705       | 319.1389         | 636.2865       | 318.6469         | 5  |
| 16 | 1519.6537 | 760.3305        | 1502.6271      | 751.8172         | 1501.6431      | 751.3252         | S    | 498.1960  | 249.6016        | 481.1694       | 241.0883         | 480.1854       | 240.5963         | 4  |
| 17 | 1616.7064 | 808.8569        | 1599.6799      | 800.3436         | 1598.6959      | 799.8516         | P    | 331.1976  | 166.1024        | 314.1710       | 157.5892         | 313.1870       | 157.0972         | 3  |
| 18 | 1703.7385 | 852.3729        | 1686.7119      | 843.8596         | 1685.7279      | 843.3676         | S    | 234.1448  | 117.5761        | 217.1183       | 109.0628         | 216.1343       | 108.5708         | 2  |
| 19 |           |                 |                |                  |                |                  | K    | 147.1128  | 74.0600         | 130.0863       | 65.5468          |                |                  | 1  |

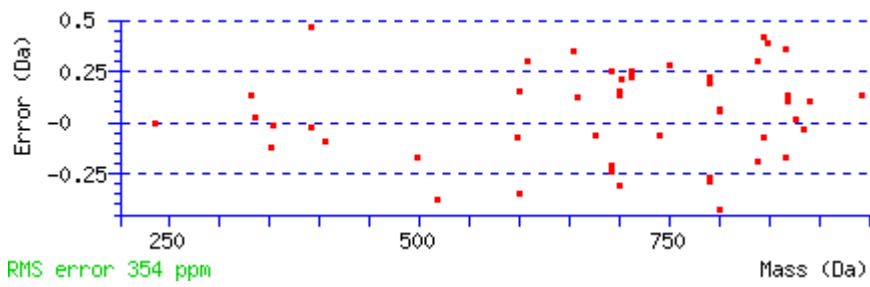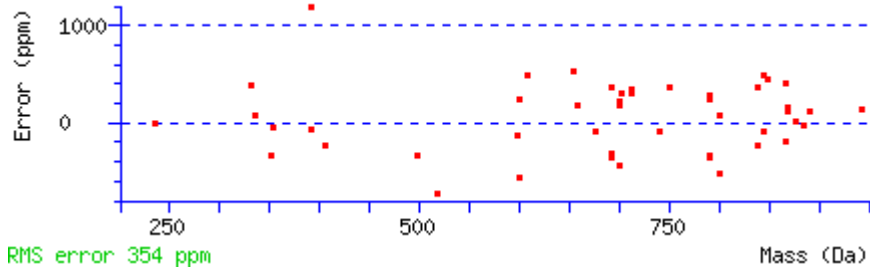

IDENTIFICATION 57

MS/MS Fragmentation of **KPLTPK**

Found in **IPI00122273**

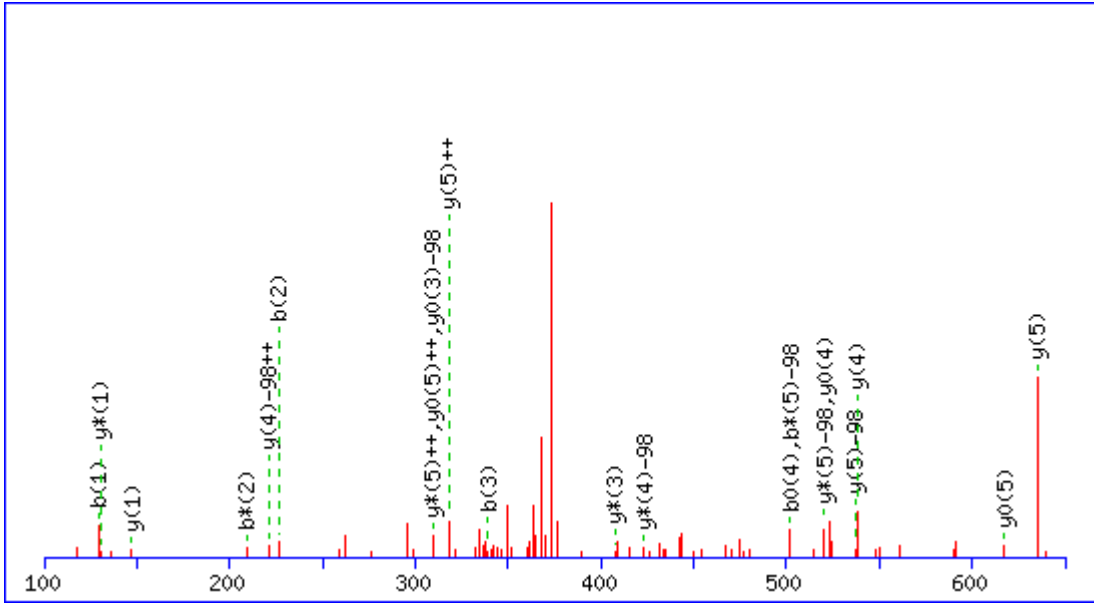

Monoisotopic mass of neutral peptide  $M_r(\text{calc})$ : 762.4041

Fixed modifications: Carbamidomethyl (C) (apply to specified residues or termini only)

Variable modifications:

T4 : Phospho (ST), with neutral losses 0.0000 (shown in table), 97.9769

Ions Score: 19 Expect: 0.87 (help)

| # | b        | b <sup>++</sup> | b <sup>*</sup> | b <sup>+++</sup> | b <sup>0</sup> | b <sup>0++</sup> | Seq. | y        | y <sup>++</sup> | y <sup>*</sup> | y <sup>+++</sup> | y <sup>0</sup> | y <sup>0++</sup> | # |
|---|----------|-----------------|----------------|------------------|----------------|------------------|------|----------|-----------------|----------------|------------------|----------------|------------------|---|
| 1 | 129.1022 | 65.0548         | 112.0757       | 56.5415          |                |                  | K    |          |                 |                |                  |                |                  | 6 |
| 2 | 226.1550 | 113.5811        | 209.1285       | 105.0679         |                |                  | P    | 635.3164 | 318.1618        | 618.2899       | 309.6486         | 617.3058       | 309.1566         | 5 |
| 3 | 339.2391 | 170.1232        | 322.2125       | 161.6099         |                |                  | L    | 538.2636 | 269.6355        | 521.2371       | 261.1222         | 520.2531       | 260.6302         | 4 |
| 4 | 520.2531 | 260.6302        | 503.2265       | 252.1169         | 502.2425       | 251.6249         | T    | 425.1796 | 213.0934        | 408.1530       | 204.5802         | 407.1690       | 204.0881         | 3 |
| 5 | 617.3058 | 309.1566        | 600.2793       | 300.6433         | 599.2953       | 300.1513         | P    | 244.1656 | 122.5864        | 227.1390       | 114.0731         |                |                  | 2 |
| 6 |          |                 |                |                  |                |                  | K    | 147.1128 | 74.0600         | 130.0863       | 65.5468          |                |                  | 1 |

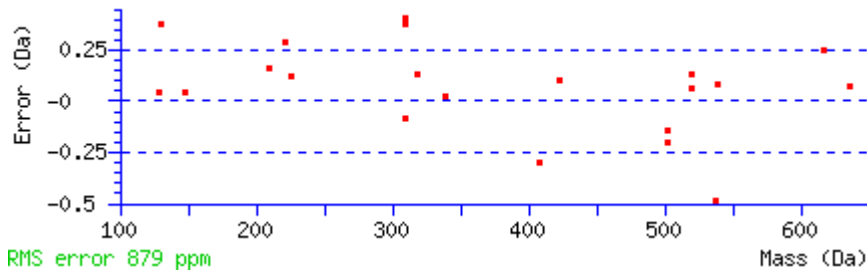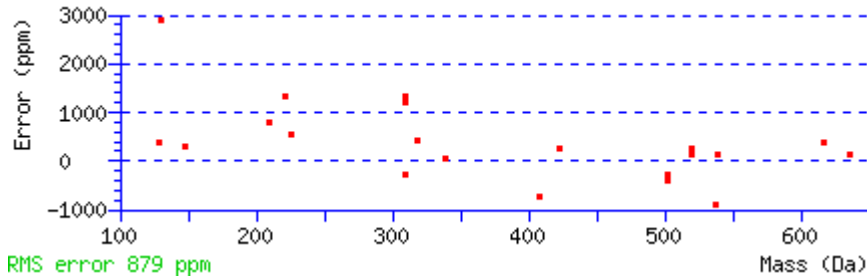

IDENTIFICATION 58

MS/MS Fragmentation of EGEEPTVYSDDEEPKDETAR

Found in IPI00319973

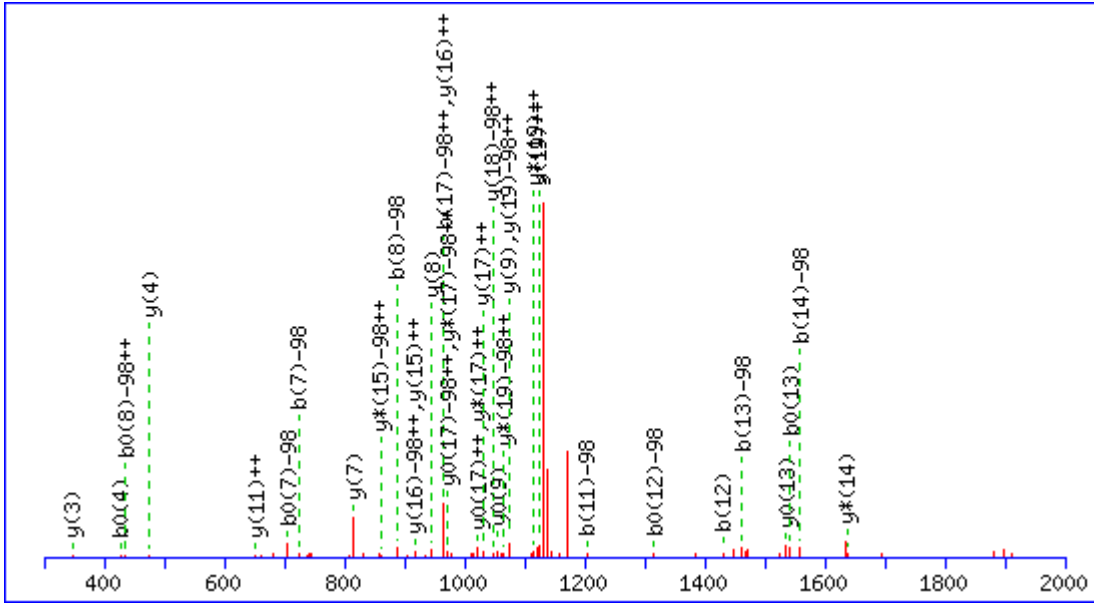

Monoisotopic mass of neutral peptide Mr(calc): 2374.9326 Fixed modifications: Carbamidomethyl (C) (apply to specified residues or termini only) Variable modifications: T6 : Phospho (ST), with neutral losses 97.9769 (shown in table), 0.0000 Ions Score: 30 Expect: 0.19 (help)

| #  | b         | b <sup>++</sup> | b <sup>*</sup> | b <sup>+++</sup> | b <sup>0</sup> | b <sup>0++</sup> | Seq. | y         | y <sup>++</sup> | y <sup>*</sup> | y <sup>+++</sup> | y <sup>0</sup> | y <sup>0++</sup> | #  |
|----|-----------|-----------------|----------------|------------------|----------------|------------------|------|-----------|-----------------|----------------|------------------|----------------|------------------|----|
| 1  | 130.0499  | 65.5286         |                |                  | 112.0393       | 56.5233          | E    |           |                 |                |                  |                |                  | 20 |
| 2  | 187.0713  | 94.0393         |                |                  | 169.0608       | 85.0340          | G    | 2148.9204 | 1074.9638       | 2131.8938      | 1066.4506        | 2130.9098      | 1065.9585        | 19 |
| 3  | 316.1139  | 158.5606        |                |                  | 298.1034       | 149.5553         | E    | 2091.8989 | 1046.4531       | 2074.8724      | 1037.9398        | 2073.8883      | 1037.4478        | 18 |
| 4  | 445.1565  | 223.0819        |                |                  | 427.1460       | 214.0766         | E    | 1962.8563 | 981.9318        | 1945.8298      | 973.4185         | 1944.8458      | 972.9265         | 17 |
| 5  | 542.2093  | 271.6083        |                |                  | 524.1987       | 262.6030         | P    | 1833.8137 | 917.4105        | 1816.7872      | 908.8972         | 1815.8032      | 908.4052         | 16 |
| 6  | 625.2464  | 313.1268        |                |                  | 607.2358       | 304.1216         | T    | 1736.7610 | 868.8841        | 1719.7344      | 860.3708         | 1718.7504      | 859.8788         | 15 |
| 7  | 724.3148  | 362.6610        |                |                  | 706.3042       | 353.6558         | V    | 1653.7239 | 827.3656        | 1636.6973      | 818.8523         | 1635.7133      | 818.3603         | 14 |
| 8  | 887.3781  | 444.1927        |                |                  | 869.3676       | 435.1874         | Y    | 1554.6554 | 777.8314        | 1537.6289      | 769.3181         | 1536.6449      | 768.8261         | 13 |
| 9  | 974.4102  | 487.7087        |                |                  | 956.3996       | 478.7034         | S    | 1391.5921 | 696.2997        | 1374.5656      | 687.7864         | 1373.5815      | 687.2944         | 12 |
| 10 | 1089.4371 | 545.2222        |                |                  | 1071.4265      | 536.2169         | D    | 1304.5601 | 652.7837        | 1287.5335      | 644.2704         | 1286.5495      | 643.7784         | 11 |
| 11 | 1204.4641 | 602.7357        |                |                  | 1186.4535      | 593.7304         | D    | 1189.5331 | 595.2702        | 1172.5066      | 586.7569         | 1171.5226      | 586.2649         | 10 |
| 12 | 1333.5066 | 667.2570        |                |                  | 1315.4961      | 658.2517         | E    | 1074.5062 | 537.7567        | 1057.4796      | 529.2435         | 1056.4956      | 528.7515         | 9  |
| 13 | 1462.5492 | 731.7783        |                |                  | 1444.5387      | 722.7730         | E    | 945.4636  | 473.2354        | 928.4371       | 464.7222         | 927.4530       | 464.2302         | 8  |
| 14 | 1559.6020 | 780.3046        |                |                  | 1541.5914      | 771.2994         | P    | 816.4210  | 408.7141        | 799.3945       | 400.2009         | 798.4104       | 399.7089         | 7  |
| 15 | 1687.6970 | 844.3521        | 1670.6704      | 835.8388         | 1669.6864      | 835.3468         | K    | 719.3682  | 360.1878        | 702.3417       | 351.6745         | 701.3577       | 351.1825         | 6  |
| 16 | 1802.7239 | 901.8656        | 1785.6974      | 893.3523         | 1784.7133      | 892.8603         | D    | 591.2733  | 296.1403        | 574.2467       | 287.6270         | 573.2627       | 287.1350         | 5  |
| 17 | 1931.7665 | 966.3869        | 1914.7400      | 957.8736         | 1913.7559      | 957.3816         | E    | 476.2463  | 238.6268        | 459.2198       | 230.1135         | 458.2358       | 229.6215         | 4  |
| 18 | 2032.8142 | 1016.9107       | 2015.7876      | 1008.3975        | 2014.8036      | 1007.9054        | T    | 347.2037  | 174.1055        | 330.1772       | 165.5922         | 329.1932       | 165.1002         | 3  |
| 19 | 2103.8513 | 1052.4293       | 2086.8247      | 1043.9160        | 2085.8407      | 1043.4240        | A    | 246.1561  | 123.5817        | 229.1295       | 115.0684         |                |                  | 2  |
| 20 |           |                 |                |                  |                |                  | R    | 175.1190  | 88.0631         | 158.0924       | 79.5498          |                |                  | 1  |

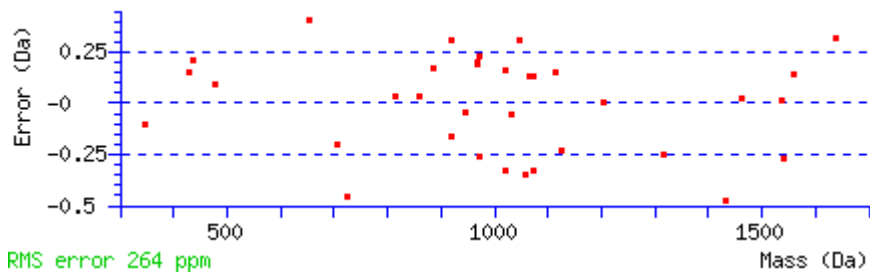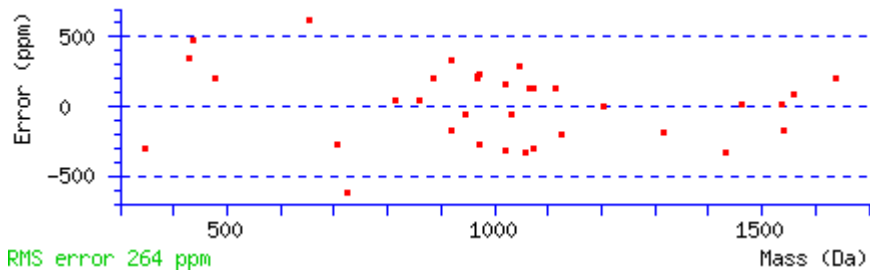

IDENTIFICATION 59

MS/MS Fragmentation of **PGPTPSGTVNGSSGRSPSK**

Found in **IPI00133030**

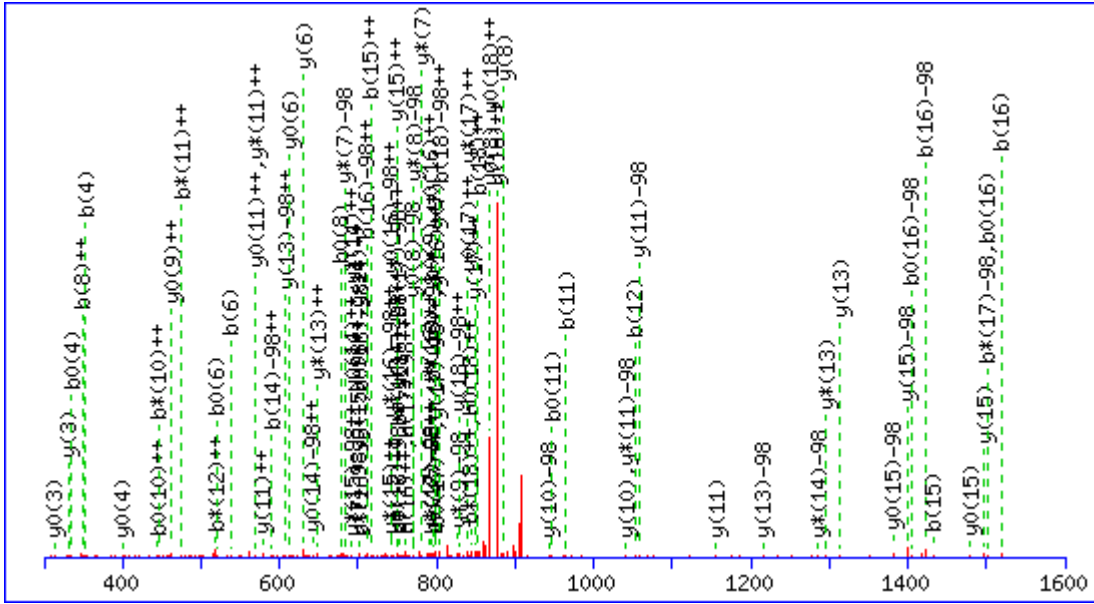

Monoisotopic mass of neutral peptide Mr(calc): 1848.8367

Fixed modifications: Carbamidomethyl (C) (apply to specified residues or termini only)

Variable modifications:

S13 : Phospho (ST), with neutral losses 97.9769 (shown in table), 0.0000

Ions Score: 34 Expect: 0.062 (help)

| #  | b         | b <sup>++</sup> | b <sup>*</sup> | b <sup>+++</sup> | b <sup>0</sup> | b <sup>0++</sup> | Seq. | y         | y <sup>++</sup> | y <sup>*</sup> | y <sup>+++</sup> | y <sup>0</sup> | y <sup>0++</sup> | #  |
|----|-----------|-----------------|----------------|------------------|----------------|------------------|------|-----------|-----------------|----------------|------------------|----------------|------------------|----|
| 1  | 98.0600   | 49.5337         |                |                  |                |                  | P    |           |                 |                |                  |                |                  | 19 |
| 2  | 155.0815  | 78.0444         |                |                  |                |                  | G    | 1654.8143 | 827.9108        | 1637.7878      | 819.3975         | 1636.8038      | 818.9055         | 18 |
| 3  | 252.1343  | 126.5708        |                |                  |                |                  | P    | 1597.7929 | 799.4001        | 1580.7663      | 790.8868         | 1579.7823      | 790.3948         | 17 |
| 4  | 353.1819  | 177.0946        |                |                  | 335.1714       | 168.0893         | T    | 1500.7401 | 750.8737        | 1483.7136      | 742.3604         | 1482.7295      | 741.8684         | 16 |
| 5  | 450.2347  | 225.6210        |                |                  | 432.2241       | 216.6157         | P    | 1399.6924 | 700.3499        | 1382.6659      | 691.8366         | 1381.6819      | 691.3446         | 15 |
| 6  | 537.2667  | 269.1370        |                |                  | 519.2562       | 260.1317         | S    | 1302.6397 | 651.8235        | 1285.6131      | 643.3102         | 1284.6291      | 642.8182         | 14 |
| 7  | 594.2882  | 297.6477        |                |                  | 576.2776       | 288.6425         | G    | 1215.6076 | 608.3075        | 1198.5811      | 599.7942         | 1197.5971      | 599.3022         | 13 |
| 8  | 695.3359  | 348.1716        |                |                  | 677.3253       | 339.1663         | T    | 1158.5862 | 579.7967        | 1141.5596      | 571.2835         | 1140.5756      | 570.7914         | 12 |
| 9  | 809.3788  | 405.1930        | 792.3523       | 396.6798         | 791.3682       | 396.1878         | N    | 1057.5385 | 529.2729        | 1040.5119      | 520.7596         | 1039.5279      | 520.2676         | 11 |
| 10 | 908.4472  | 454.7272        | 891.4207       | 446.2140         | 890.4367       | 445.7220         | V    | 943.4956  | 472.2514        | 926.4690       | 463.7381         | 925.4850       | 463.2461         | 10 |
| 11 | 965.4687  | 483.2380        | 948.4421       | 474.7247         | 947.4581       | 474.2327         | G    | 844.4272  | 422.7172        | 827.4006       | 414.2039         | 826.4166       | 413.7119         | 9  |
| 12 | 1052.5007 | 526.7540        | 1035.4742      | 518.2407         | 1034.4902      | 517.7487         | S    | 787.4057  | 394.2065        | 770.3791       | 385.6932         | 769.3951       | 385.2012         | 8  |
| 13 | 1121.5222 | 561.2647        | 1104.4956      | 552.7515         | 1103.5116      | 552.2594         | S    | 700.3737  | 350.6905        | 683.3471       | 342.1772         | 682.3631       | 341.6852         | 7  |
| 14 | 1178.5436 | 589.7755        | 1161.5171      | 581.2622         | 1160.5331      | 580.7702         | G    | 631.3522  | 316.1797        | 614.3257       | 307.6665         | 613.3416       | 307.1745         | 6  |
| 15 | 1334.6448 | 667.8260        | 1317.6182      | 659.3127         | 1316.6342      | 658.8207         | R    | 574.3307  | 287.6690        | 557.3042       | 279.1557         | 556.3202       | 278.6637         | 5  |
| 16 | 1421.6768 | 711.3420        | 1404.6502      | 702.8288         | 1403.6662      | 702.3367         | S    | 418.2296  | 209.6185        | 401.2031       | 201.1052         | 400.2191       | 200.6132         | 4  |
| 17 | 1518.7295 | 759.8684        | 1501.7030      | 751.3551         | 1500.7190      | 750.8631         | P    | 331.1976  | 166.1024        | 314.1710       | 157.5892         | 313.1870       | 157.0972         | 3  |
| 18 | 1605.7616 | 803.3844        | 1588.7350      | 794.8712         | 1587.7510      | 794.3791         | S    | 234.1448  | 117.5761        | 217.1183       | 109.0628         | 216.1343       | 108.5708         | 2  |
| 19 |           |                 |                |                  |                |                  | K    | 147.1128  | 74.0600         | 130.0863       | 65.5468          |                |                  | 1  |



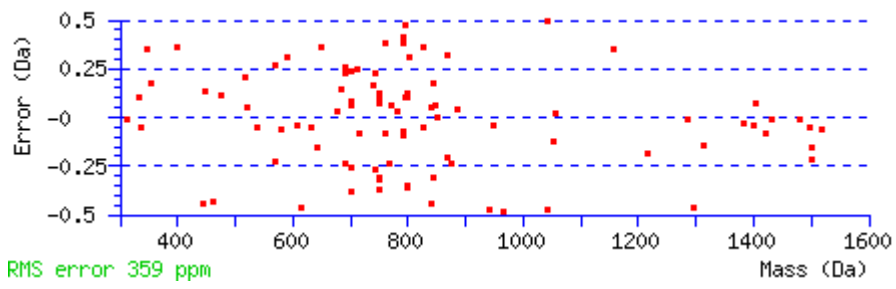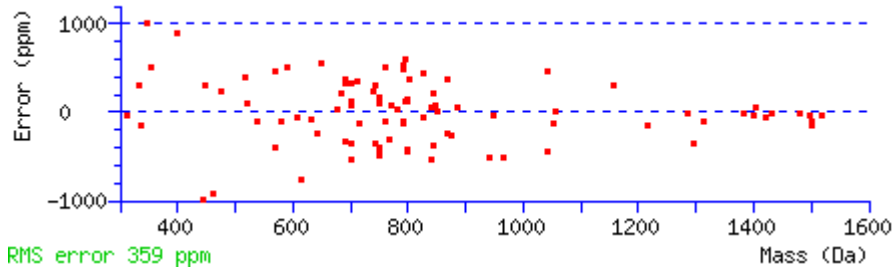

IDENTIFICATION 60

MS/MS Fragmentation of STSAPQMSPGSSDNQSSSPQPAQQK

Found in IPI00407835

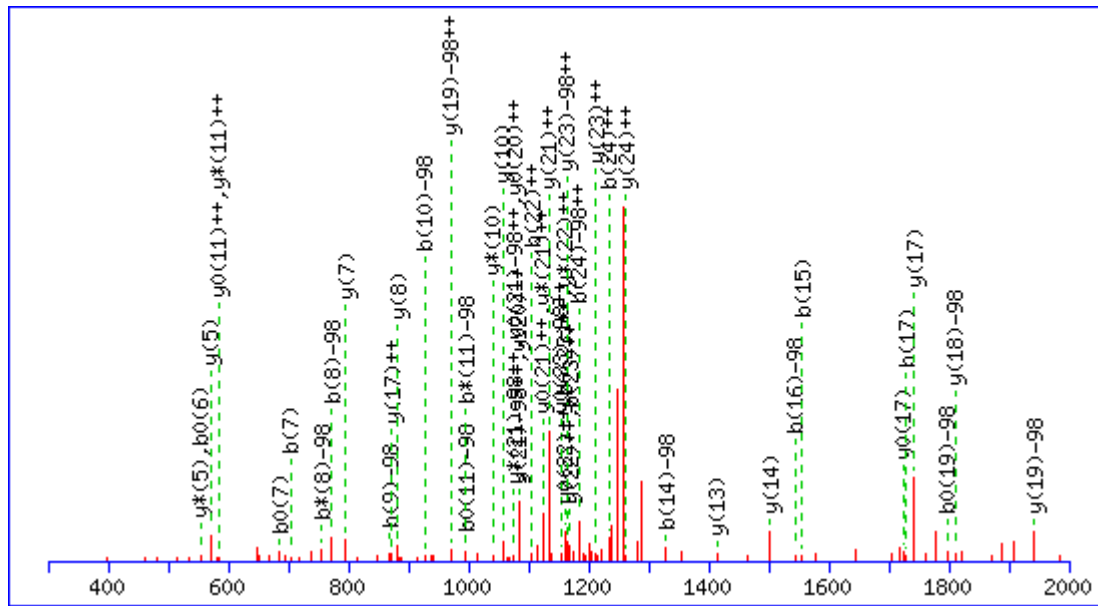

Monoisotopic mass of neutral peptide Mr(calc): 2611.0857

Fixed modifications: Carbamidomethyl (C) (apply to specified residues or termini only)

Variable modifications:

S8 : Phospho (ST), with neutral losses 97.9769 (shown in table), 0.0000

Ions Score: 43 Expect: 0.01 (help)

| #  | b         | b <sup>++</sup> | b <sup>*</sup> | b <sup>+++</sup> | b <sup>0</sup> | b <sup>0++</sup> | Seq. | y         | y <sup>++</sup> | y <sup>*</sup> | y <sup>+++</sup> | y <sup>0</sup> | y <sup>0++</sup> | #  |
|----|-----------|-----------------|----------------|------------------|----------------|------------------|------|-----------|-----------------|----------------|------------------|----------------|------------------|----|
| 1  | 88.0393   | 44.5233         |                |                  | 70.0287        | 35.5180          | S    |           |                 |                |                  |                |                  | 25 |
| 2  | 189.0870  | 95.0471         |                |                  | 171.0764       | 86.0418          | T    | 2427.0841 | 1214.0457       | 2410.0576      | 1205.5324        | 2409.0735      | 1205.0404        | 24 |
| 3  | 276.1190  | 138.5631        |                |                  | 258.1084       | 129.5579         | S    | 2326.0364 | 1163.5219       | 2309.0099      | 1155.0086        | 2308.0259      | 1154.5166        | 23 |
| 4  | 347.1561  | 174.0817        |                |                  | 329.1456       | 165.0764         | A    | 2239.0044 | 1120.0058       | 2221.9779      | 1111.4926        | 2220.9938      | 1111.0006        | 22 |
| 5  | 444.2089  | 222.6081        |                |                  | 426.1983       | 213.6028         | P    | 2167.9673 | 1084.4873       | 2150.9407      | 1075.9740        | 2149.9567      | 1075.4820        | 21 |
| 6  | 572.2675  | 286.6374        | 555.2409       | 278.1241         | 554.2569       | 277.6321         | Q    | 2070.9145 | 1035.9609       | 2053.8880      | 1027.4476        | 2052.9040      | 1026.9556        | 20 |
| 7  | 703.3080  | 352.1576        | 686.2814       | 343.6443         | 685.2974       | 343.1523         | M    | 1942.8559 | 971.9316        | 1925.8294      | 963.4183         | 1924.8454      | 962.9263         | 19 |
| 8  | 772.3294  | 386.6683        | 755.3029       | 378.1551         | 754.3188       | 377.6631         | S    | 1811.8155 | 906.4114        | 1794.7889      | 897.8981         | 1793.8049      | 897.4061         | 18 |
| 9  | 869.3822  | 435.1947        | 852.3556       | 426.6815         | 851.3716       | 426.1894         | P    | 1742.7940 | 871.9006        | 1725.7674      | 863.3874         | 1724.7834      | 862.8954         | 17 |
| 10 | 926.4036  | 463.7055        | 909.3771       | 455.1922         | 908.3931       | 454.7002         | G    | 1645.7412 | 823.3743        | 1628.7147      | 814.8610         | 1627.7307      | 814.3690         | 16 |
| 11 | 1013.4357 | 507.2215        | 996.4091       | 498.7082         | 995.4251       | 498.2162         | S    | 1588.7198 | 794.8635        | 1571.6932      | 786.3502         | 1570.7092      | 785.8582         | 15 |
| 12 | 1100.4677 | 550.7375        | 1083.4412      | 542.2242         | 1082.4571      | 541.7322         | S    | 1501.6877 | 751.3475        | 1484.6612      | 742.8342         | 1483.6772      | 742.3422         | 14 |
| 13 | 1215.4946 | 608.2510        | 1198.4681      | 599.7377         | 1197.4841      | 599.2457         | D    | 1414.6557 | 707.8315        | 1397.6292      | 699.3182         | 1396.6451      | 698.8262         | 13 |
| 14 | 1329.5376 | 665.2724        | 1312.5110      | 656.7591         | 1311.5270      | 656.2671         | N    | 1299.6288 | 650.3180        | 1282.6022      | 641.8047         | 1281.6182      | 641.3127         | 12 |
| 15 | 1457.5961 | 729.3017        | 1440.5696      | 720.7884         | 1439.5856      | 720.2964         | Q    | 1185.5858 | 593.2966        | 1168.5593      | 584.7833         | 1167.5753      | 584.2913         | 11 |
| 16 | 1544.6282 | 772.8177        | 1527.6016      | 764.3045         | 1526.6176      | 763.8124         | S    | 1057.5273 | 529.2673        | 1040.5007      | 520.7540         | 1039.5167      | 520.2620         | 10 |
| 17 | 1631.6602 | 816.3337        | 1614.6337      | 807.8205         | 1613.6496      | 807.3285         | S    | 970.4952  | 485.7513        | 953.4687       | 477.2380         | 952.4847       | 476.7460         | 9  |
| 18 | 1718.6922 | 859.8498        | 1701.6657      | 851.3365         | 1700.6817      | 850.8445         | S    | 883.4632  | 442.2352        | 866.4367       | 433.7220         | 865.4526       | 433.2300         | 8  |
| 19 | 1815.7450 | 908.3761        | 1798.7184      | 899.8629         | 1797.7344      | 899.3709         | P    | 796.4312  | 398.7192        | 779.4046       | 390.2060         |                |                  | 7  |
| 20 | 1943.8036 | 972.4054        | 1926.7770      | 963.8922         | 1925.7930      | 963.4001         | Q    | 699.3784  | 350.1928        | 682.3519       | 341.6796         |                |                  | 6  |
| 21 | 2040.8563 | 1020.9318       | 2023.8298      | 1012.4185        | 2022.8458      | 1011.9265        | P    | 571.3198  | 286.1636        | 554.2933       | 277.6503         |                |                  | 5  |
| 22 | 2111.8935 | 1056.4504       | 2094.8669      | 1047.9371        | 2093.8829      | 1047.4451        | A    | 474.2671  | 237.6372        | 457.2405       | 229.1239         |                |                  | 4  |
| 23 | 2239.9520 | 1120.4797       | 2222.9255      | 1111.9664        | 2221.9415      | 1111.4744        | Q    | 403.2300  | 202.1186        | 386.2034       | 193.6053         |                |                  | 3  |
| 24 | 2368.0106 | 1184.5089       | 2350.9841      | 1175.9957        | 2350.0000      | 1175.5037        | Q    | 275.1714  | 138.0893        | 258.1448       | 129.5761         |                |                  | 2  |
| 25 |           |                 |                |                  |                |                  | K    | 147.1128  | 74.0600         | 130.0863       | 65.5468          |                |                  | 1  |

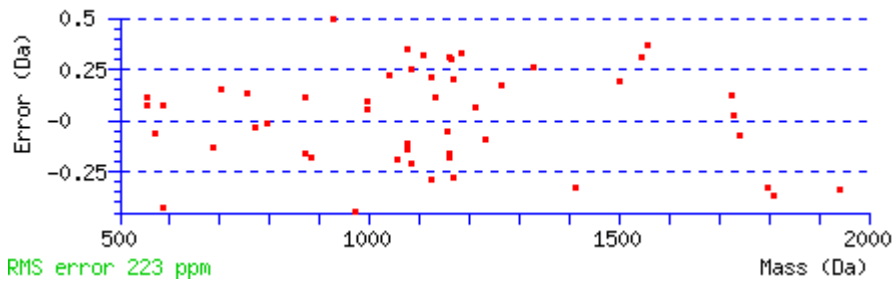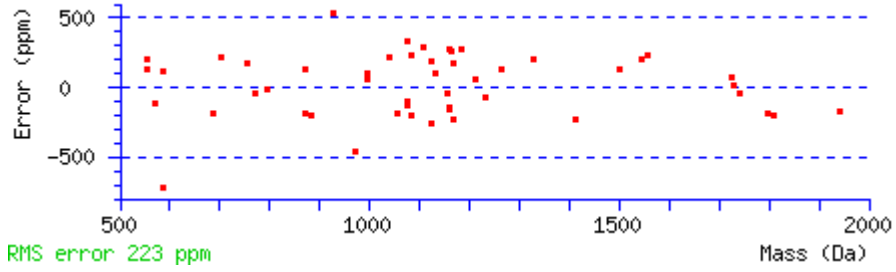



|    |           |           |           |           |           |           |   |           |          |           |          |           |          |    |
|----|-----------|-----------|-----------|-----------|-----------|-----------|---|-----------|----------|-----------|----------|-----------|----------|----|
| 13 | 1394.5835 | 697.7954  | 1377.5570 | 689.2821  | 1376.5730 | 688.7901  | A | 1609.7890 | 805.3982 | 1592.7625 | 796.8849 | 1591.7785 | 796.3929 | 16 |
| 14 | 1451.6050 | 726.3061  | 1434.5784 | 717.7929  | 1433.5944 | 717.3009  | G | 1538.7519 | 769.8796 | 1521.7254 | 761.3663 | 1520.7414 | 760.8743 | 15 |
| 15 | 1508.6265 | 754.8169  | 1491.5999 | 746.3036  | 1490.6159 | 745.8116  | G | 1481.7305 | 741.3689 | 1464.7039 | 732.8556 | 1463.7199 | 732.3636 | 14 |
| 16 | 1605.6792 | 803.3432  | 1588.6527 | 794.8300  | 1587.6687 | 794.3380  | P | 1424.7090 | 712.8581 | 1407.6824 | 704.3449 | 1406.6984 | 703.8529 | 13 |
| 17 | 1733.7378 | 867.3725  | 1716.7113 | 858.8593  | 1715.7272 | 858.3673  | Q | 1327.6562 | 664.3318 | 1310.6297 | 655.8185 | 1309.6457 | 655.3265 | 12 |
| 18 | 1832.8062 | 916.9067  | 1815.7797 | 908.3935  | 1814.7957 | 907.9015  | V | 1199.5977 | 600.3025 | 1182.5711 | 591.7892 | 1181.5871 | 591.2972 | 11 |
| 19 | 1946.8491 | 973.9282  | 1929.8226 | 965.4149  | 1928.8386 | 964.9229  | N | 1100.5292 | 550.7683 | 1083.5027 | 542.2550 | 1082.5187 | 541.7630 | 10 |
| 20 | 2043.9019 | 1022.4546 | 2026.8754 | 1013.9413 | 2025.8913 | 1013.4493 | P | 986.4863  | 493.7468 |           |          | 968.4757  | 484.7415 | 9  |
| 21 | 2174.9424 | 1087.9748 | 2157.9158 | 1079.4616 | 2156.9318 | 1078.9696 | M | 889.4335  | 445.2204 |           |          | 871.4230  | 436.2151 | 8  |
| 22 | 2271.9952 | 1136.5012 | 2254.9686 | 1127.9879 | 2253.9846 | 1127.4959 | P | 758.3931  | 379.7002 |           |          | 740.3825  | 370.6949 | 7  |
| 23 | 2371.0636 | 1186.0354 | 2354.0370 | 1177.5221 | 2353.0530 | 1177.0301 | V | 661.3403  | 331.1738 |           |          | 643.3297  | 322.1685 | 6  |
| 24 | 2472.1112 | 1236.5593 | 2455.0847 | 1228.0460 | 2454.1007 | 1227.5540 | T | 562.2719  | 281.6396 |           |          | 544.2613  | 272.6343 | 5  |
| 25 | 2587.1382 | 1294.0727 | 2570.1116 | 1285.5595 | 2569.1276 | 1285.0675 | D | 461.2242  | 231.1157 |           |          | 443.2136  | 222.1105 | 4  |
| 26 | 2716.1808 | 1358.5940 | 2699.1542 | 1350.0808 | 2698.1702 | 1349.5887 | E | 346.1973  | 173.6023 |           |          | 328.1867  | 164.5970 | 3  |
| 27 | 2815.2492 | 1408.1282 | 2798.2226 | 1399.6150 | 2797.2386 | 1399.1230 | V | 217.1547  | 109.0810 |           |          |           |          | 2  |
| 28 |           |           |           |           |           |           | V | 118.0863  | 59.5468  |           |          |           |          | 1  |

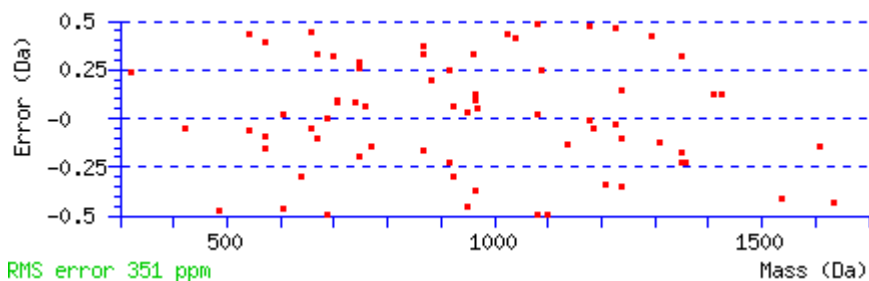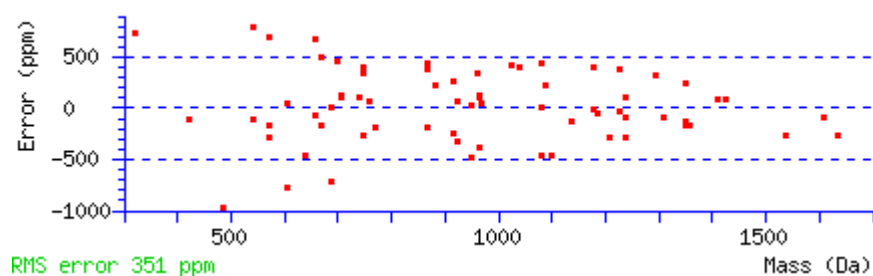



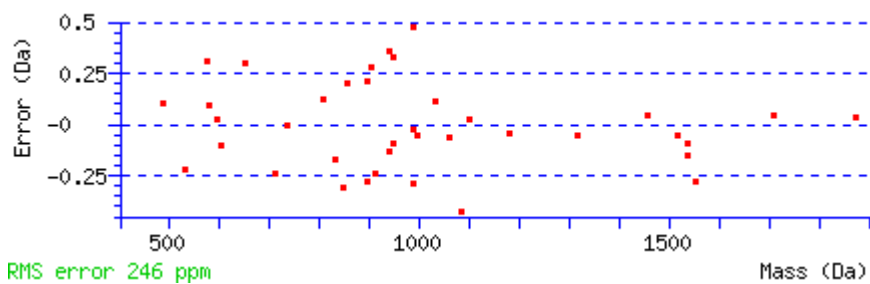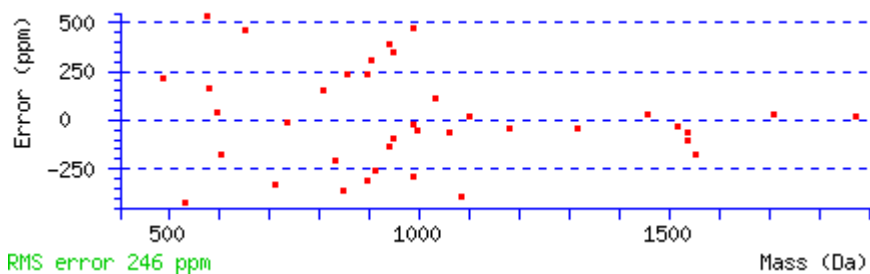

IDENTIFICATION 63

MS/MS Fragmentation of SSEAETQPPAAPAAALSAADTKPGSTGSGAGSGGPGGLTSAAPAGGDKK

Found in IPI00120886

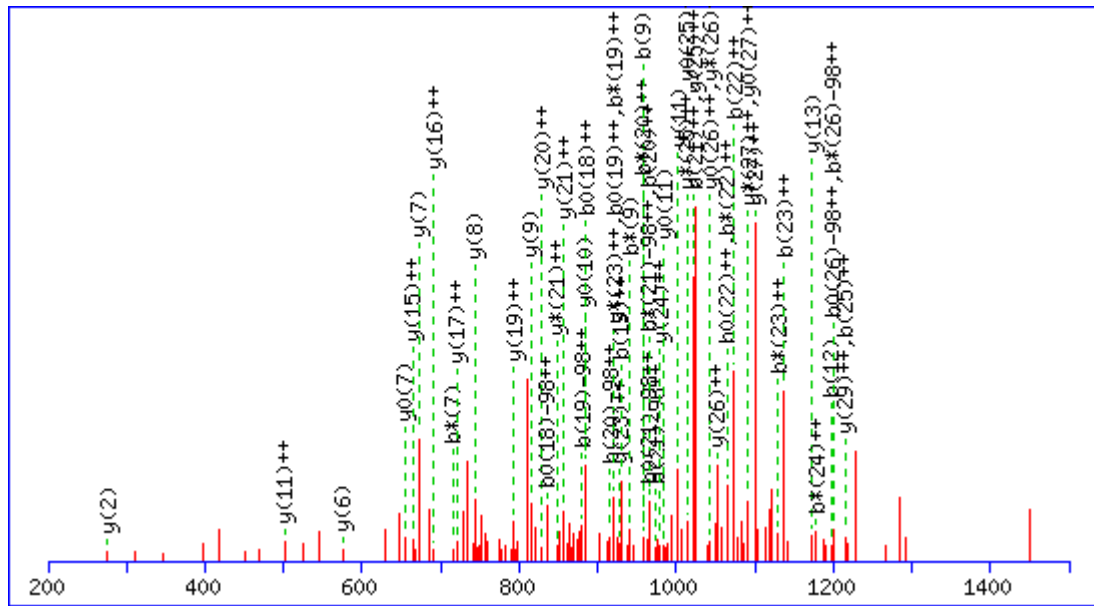

Monoisotopic mass of neutral peptide Mr(calc): 4471.0776

Fixed modifications: Carbamidomethyl (C) (apply to specified residues or termini only)

Variable modifications:

S18 : Phospho (ST), with neutral losses 0.0000(shown in table), 97.9769

Ions Score: 23 Expect: 0.9 (help)

| #  | b         | b <sup>++</sup> | b <sup>*</sup> | b <sup>+++</sup> | b <sup>0</sup> | b <sup>0++</sup> | Seq. | y         | y <sup>++</sup> | y <sup>*</sup> | y <sup>+++</sup> | y <sup>0</sup> | y <sup>0++</sup> | #  |
|----|-----------|-----------------|----------------|------------------|----------------|------------------|------|-----------|-----------------|----------------|------------------|----------------|------------------|----|
| 1  | 88.0393   | 44.5233         |                |                  | 70.0287        | 35.5180          | S    |           |                 |                |                  |                |                  | 50 |
| 2  | 175.0713  | 88.0393         |                |                  | 157.0608       | 79.0340          | S    | 4385.0529 | 2193.0301       | 4368.0263      | 2184.5168        | 4367.0423      | 2184.0248        | 49 |
| 3  | 304.1139  | 152.5606        |                |                  | 286.1034       | 143.5553         | E    | 4298.0209 | 2149.5141       | 4280.9943      | 2141.0008        | 4280.0103      | 2140.5088        | 48 |
| 4  | 375.1510  | 188.0792        |                |                  | 357.1405       | 179.0739         | A    | 4168.9783 | 2084.9928       | 4151.9517      | 2076.4795        | 4150.9677      | 2075.9875        | 47 |
| 5  | 504.1936  | 252.6005        |                |                  | 486.1831       | 243.5952         | E    | 4097.9412 | 2049.4742       | 4080.9146      | 2040.9609        | 4079.9306      | 2040.4689        | 46 |
| 6  | 605.2413  | 303.1243        |                |                  | 587.2307       | 294.1190         | T    | 3968.8986 | 1984.9529       | 3951.8720      | 1976.4396        | 3950.8880      | 1975.9476        | 45 |
| 7  | 733.2999  | 367.1536        | 716.2733       | 358.6403         | 715.2893       | 358.1483         | Q    | 3867.8509 | 1934.4291       | 3850.8243      | 1925.9158        | 3849.8403      | 1925.4238        | 44 |
| 8  | 861.3585  | 431.1829        | 844.3319       | 422.6696         | 843.3479       | 422.1776         | Q    | 3739.7923 | 1870.3998       | 3722.7658      | 1861.8865        | 3721.7817      | 1861.3945        | 43 |
| 9  | 958.4112  | 479.7093        | 941.3847       | 471.1960         | 940.4007       | 470.7040         | P    | 3611.7337 | 1806.3705       | 3594.7072      | 1797.8572        | 3593.7232      | 1797.3652        | 42 |
| 10 | 1055.4640 | 528.2356        | 1038.4374      | 519.7224         | 1037.4534      | 519.2304         | P    | 3514.6810 | 1757.8441       | 3497.6544      | 1749.3308        | 3496.6704      | 1748.8388        | 41 |
| 11 | 1126.5011 | 563.7542        | 1109.4746      | 555.2409         | 1108.4905      | 554.7489         | A    | 3417.6282 | 1709.3177       | 3400.6017      | 1700.8045        | 3399.6176      | 1700.3125        | 40 |
| 12 | 1197.5382 | 599.2727        | 1180.5117      | 590.7595         | 1179.5277      | 590.2675         | A    | 3346.5911 | 1673.7992       | 3329.5645      | 1665.2859        | 3328.5805      | 1664.7939        | 39 |
| 13 | 1294.5910 | 647.7991        | 1277.5644      | 639.2859         | 1276.5804      | 638.7938         | P    | 3275.5540 | 1638.2806       | 3258.5274      | 1629.7674        | 3257.5434      | 1629.2753        | 38 |
| 14 | 1365.6281 | 683.3177        | 1348.6016      | 674.8044         | 1347.6175      | 674.3124         | A    | 3178.5012 | 1589.7542       | 3161.4747      | 1581.2410        | 3160.4906      | 1580.7490        | 37 |
| 15 | 1436.6652 | 718.8362        | 1419.6387      | 710.3230         | 1418.6546      | 709.8310         | A    | 3107.4641 | 1554.2357       | 3090.4375      | 1545.7224        | 3089.4535      | 1545.2304        | 36 |
| 16 | 1507.7023 | 754.3548        | 1490.6758      | 745.8415         | 1489.6918      | 745.3495         | A    | 3036.4270 | 1518.7171       | 3019.4004      | 1510.2039        | 3018.4164      | 1509.7118        | 35 |
| 17 | 1620.7864 | 810.8968        | 1603.7598      | 802.3836         | 1602.7758      | 801.8916         | L    | 2965.3899 | 1483.1986       | 2948.3633      | 1474.6853        | 2947.3793      | 1474.1933        | 34 |
| 18 | 1787.7848 | 894.3960        | 1770.7582      | 885.8827         | 1769.7742      | 885.3907         | S    | 2852.3058 | 1426.6565       | 2835.2793      | 1418.1433        | 2834.2952      | 1417.6513        | 33 |
| 19 | 1858.8219 | 929.9146        | 1841.7953      | 921.4013         | 1840.8113      | 920.9093         | A    | 2685.3074 | 1343.1574       | 2668.2809      | 1334.6441        | 2667.2969      | 1334.1521        | 32 |
| 20 | 1929.8590 | 965.4331        | 1912.8324      | 956.9199         | 1911.8484      | 956.4278         | A    | 2614.2703 | 1307.6388       | 2597.2438      | 1299.1255        | 2596.2598      | 1298.6335        | 31 |
| 21 | 2044.8859 | 1022.9466       | 2027.8594      | 1014.4333        | 2026.8754      | 1013.9413        | D    | 2543.2332 | 1272.1202       | 2526.2067      | 1263.6070        | 2525.2227      | 1263.1150        | 30 |
| 22 | 2145.9336 | 1073.4704       | 2128.9071      | 1064.9572        | 2127.9230      | 1064.4652        | T    | 2428.2063 | 1214.6068       | 2411.1797      | 1206.0935        | 2410.1957      | 1205.6015        | 29 |
| 23 | 2274.0286 | 1137.5179       | 2257.0020      | 1129.0046        | 2256.0180      | 1128.5126        | K    | 2327.1586 | 1164.0829       | 2310.1320      | 1155.5697        | 2309.1480      | 1155.0777        | 28 |
| 24 | 2371.0813 | 1186.0443       | 2354.0548      | 1177.5310        | 2353.0708      | 1177.0390        | P    | 2199.0636 | 1100.0355       | 2182.0371      | 1091.5222        | 2181.0531      | 1091.0302        | 27 |
| 25 | 2428.1028 | 1214.5550       | 2411.0762      | 1206.0418        | 2410.0922      | 1205.5498        | G    | 2102.0109 | 1051.5091       | 2084.9843      | 1042.9958        | 2084.0003      | 1042.5038        | 26 |
| 26 | 2515.1348 | 1258.0710       | 2498.1083      | 1249.5578        | 2497.1243      | 1249.0658        | S    | 2044.9894 | 1022.9983       | 2027.9629      | 1014.4851        | 2026.9788      | 1013.9931        | 25 |
| 27 | 2616.1825 | 1308.5949       | 2599.1560      | 1300.0816        | 2598.1719      | 1299.5896        | T    | 1957.9574 | 979.4823        | 1940.9308      | 970.9691         | 1939.9468      | 970.4770         | 24 |



|    |           |           |           |           |           |           |   |           |          |           |          |           |          |    |
|----|-----------|-----------|-----------|-----------|-----------|-----------|---|-----------|----------|-----------|----------|-----------|----------|----|
| 28 | 2673.2040 | 1337.1056 | 2656.1774 | 1328.5923 | 2655.1934 | 1328.1003 | G | 1856.9097 | 928.9585 | 1839.8831 | 920.4452 | 1838.8991 | 919.9532 | 23 |
| 29 | 2760.2360 | 1380.6216 | 2743.2094 | 1372.1084 | 2742.2254 | 1371.6164 | S | 1799.8882 | 900.4478 | 1782.8617 | 891.9345 | 1781.8777 | 891.4425 | 22 |
| 30 | 2817.2575 | 1409.1324 | 2800.2309 | 1400.6191 | 2799.2469 | 1400.1271 | G | 1712.8562 | 856.9317 | 1695.8297 | 848.4185 | 1694.8456 | 847.9265 | 21 |
| 31 | 2888.2946 | 1444.6509 | 2871.2680 | 1436.1376 | 2870.2840 | 1435.6456 | A | 1655.8347 | 828.4210 | 1638.8082 | 819.9077 | 1637.8242 | 819.4157 | 20 |
| 32 | 2945.3160 | 1473.1617 | 2928.2895 | 1464.6484 | 2927.3055 | 1464.1564 | G | 1584.7976 | 792.9025 | 1567.7711 | 784.3892 | 1566.7871 | 783.8972 | 19 |
| 33 | 3032.3481 | 1516.6777 | 3015.3215 | 1508.1644 | 3014.3375 | 1507.6724 | S | 1527.7762 | 764.3917 | 1510.7496 | 755.8784 | 1509.7656 | 755.3864 | 18 |
| 34 | 3089.3695 | 1545.1884 | 3072.3430 | 1536.6751 | 3071.3590 | 1536.1831 | G | 1440.7441 | 720.8757 | 1423.7176 | 712.3624 | 1422.7336 | 711.8704 | 17 |
| 35 | 3146.3910 | 1573.6991 | 3129.3644 | 1565.1859 | 3128.3804 | 1564.6939 | G | 1383.7227 | 692.3650 | 1366.6961 | 683.8517 | 1365.7121 | 683.3597 | 16 |
| 36 | 3243.4438 | 1622.2255 | 3226.4172 | 1613.7122 | 3225.4332 | 1613.2202 | P | 1326.7012 | 663.8542 | 1309.6747 | 655.3410 | 1308.6906 | 654.8490 | 15 |
| 37 | 3300.4652 | 1650.7362 | 3283.4387 | 1642.2230 | 3282.4547 | 1641.7310 | G | 1229.6484 | 615.3279 | 1212.6219 | 606.8146 | 1211.6379 | 606.3226 | 14 |
| 38 | 3357.4867 | 1679.2470 | 3340.4601 | 1670.7337 | 3339.4761 | 1670.2417 | G | 1172.6270 | 586.8171 | 1155.6004 | 578.3039 | 1154.6164 | 577.8118 | 13 |
| 39 | 3470.5707 | 1735.7890 | 3453.5442 | 1727.2757 | 3452.5602 | 1726.7837 | L | 1115.6055 | 558.3064 | 1098.5790 | 549.7931 | 1097.5949 | 549.3011 | 12 |
| 40 | 3571.6184 | 1786.3129 | 3554.5919 | 1777.7996 | 3553.6079 | 1777.3076 | T | 1002.5215 | 501.7644 | 985.4949  | 493.2511 | 984.5109  | 492.7591 | 11 |
| 41 | 3658.6505 | 1829.8289 | 3641.6239 | 1821.3156 | 3640.6399 | 1820.8236 | S | 901.4738  | 451.2405 | 884.4472  | 442.7272 | 883.4632  | 442.2352 | 10 |
| 42 | 3729.6876 | 1865.3474 | 3712.6610 | 1856.8341 | 3711.6770 | 1856.3421 | A | 814.4417  | 407.7245 | 797.4152  | 399.2112 | 796.4312  | 398.7192 | 9  |
| 43 | 3800.7247 | 1900.8660 | 3783.6981 | 1892.3527 | 3782.7141 | 1891.8607 | A | 743.4046  | 372.2060 | 726.3781  | 363.6927 | 725.3941  | 363.2007 | 8  |
| 44 | 3897.7774 | 1949.3924 | 3880.7509 | 1940.8791 | 3879.7669 | 1940.3871 | P | 672.3675  | 336.6874 | 655.3410  | 328.1741 | 654.3570  | 327.6821 | 7  |
| 45 | 3968.8146 | 1984.9109 | 3951.7880 | 1976.3976 | 3950.8040 | 1975.9056 | A | 575.3148  | 288.1610 | 558.2882  | 279.6477 | 557.3042  | 279.1557 | 6  |
| 46 | 4025.8360 | 2013.4216 | 4008.8095 | 2004.9084 | 4007.8255 | 2004.4164 | G | 504.2776  | 252.6425 | 487.2511  | 244.1292 | 486.2671  | 243.6372 | 5  |
| 47 | 4082.8575 | 2041.9324 | 4065.8309 | 2033.4191 | 4064.8469 | 2032.9271 | G | 447.2562  | 224.1317 | 430.2296  | 215.6185 | 429.2456  | 215.1264 | 4  |
| 48 | 4197.8844 | 2099.4459 | 4180.8579 | 2090.9326 | 4179.8739 | 2090.4406 | D | 390.2347  | 195.6210 | 373.2082  | 187.1077 | 372.2241  | 186.6157 | 3  |
| 49 | 4325.9794 | 2163.4933 | 4308.9528 | 2154.9801 | 4307.9688 | 2154.4881 | K | 275.2078  | 138.1075 | 258.1812  | 129.5942 |           |          | 2  |
| 50 |           |           |           |           |           |           | K | 147.1128  | 74.0600  | 130.0863  | 65.5468  |           |          | 1  |

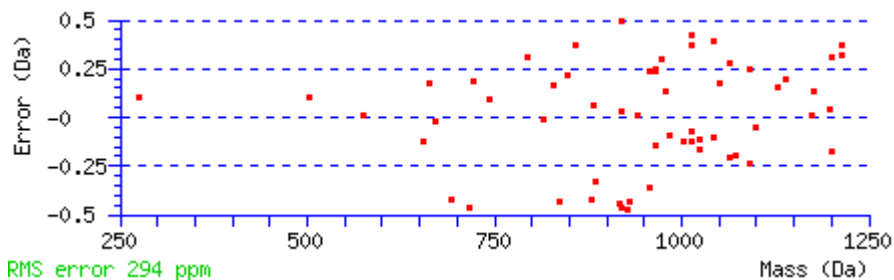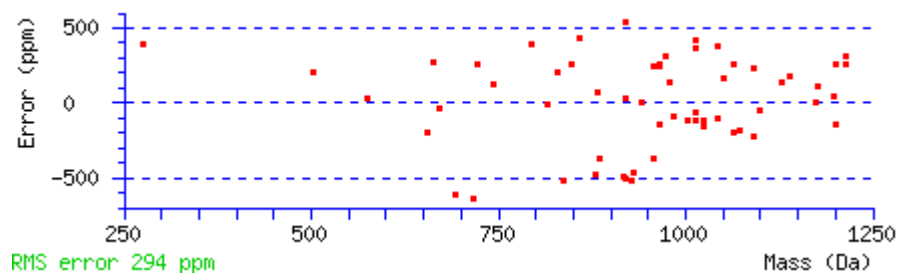



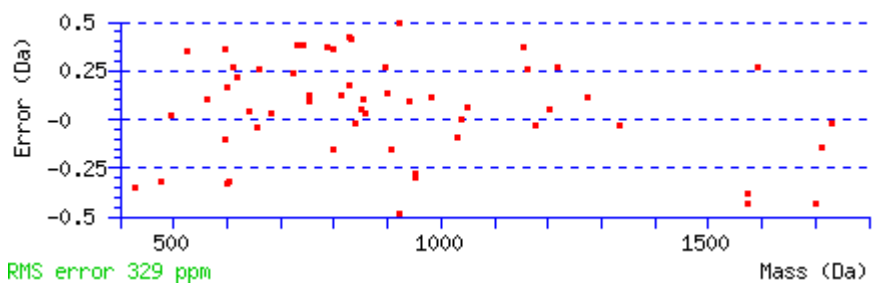

RMS error 329 ppm

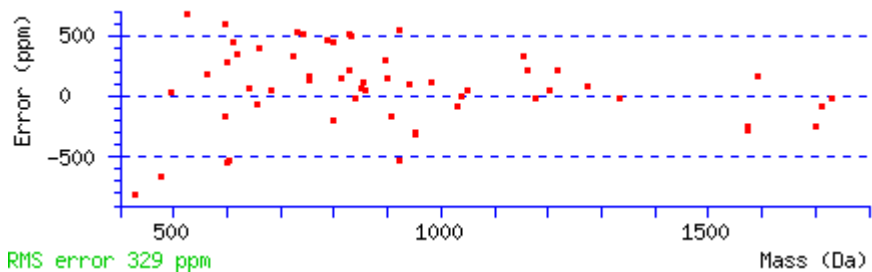

RMS error 329 ppm

IDENTIFICATION 65

MS/MS Fragmentation of **STSPAPADVAPAQEDLR**

Found in **IPI00130095**

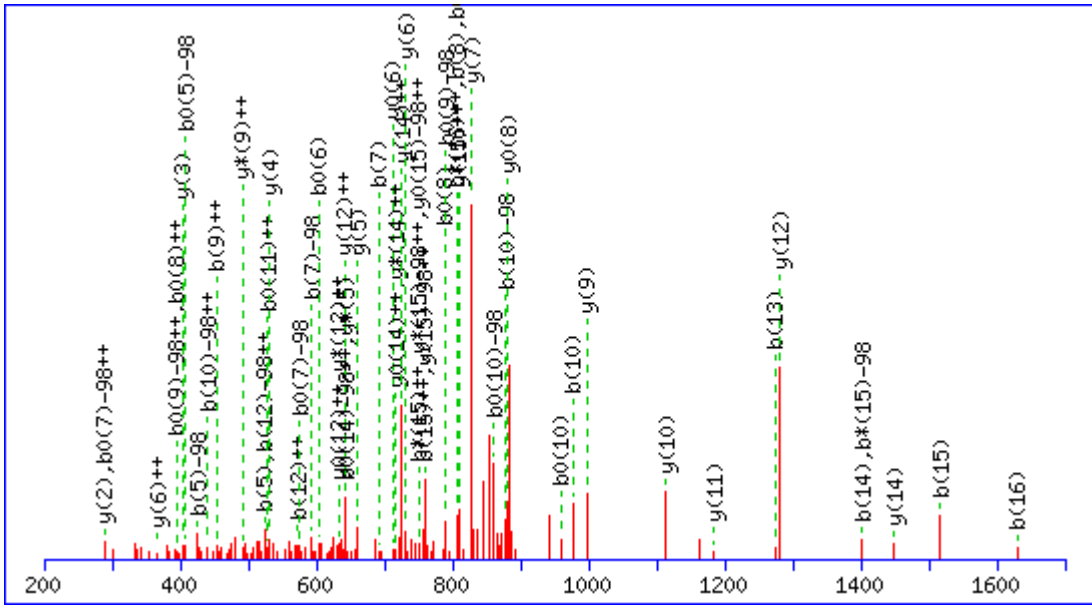

Monoisotopic mass of neutral peptide Mr(calc): 1803.8040

Fixed modifications: Carbamidomethyl (C) (apply to specified residues or termini only)

Variable modifications:

S3 : Phospho (ST), with neutral losses 97.9769 (shown in table), 0.0000

Ions Score: 80 Expect: 1.7e-06 (help)

| #  | b               | b <sup>++</sup> | b <sup>*</sup>   | b <sup>+++</sup> | b <sup>0</sup>  | b <sup>0++</sup> | Seq. | y                | y <sup>++</sup> | y <sup>*</sup>  | y <sup>+++</sup> | y <sup>0</sup>  | y <sup>0++</sup> | #  |
|----|-----------------|-----------------|------------------|------------------|-----------------|------------------|------|------------------|-----------------|-----------------|------------------|-----------------|------------------|----|
| 1  | 88.0393         | 44.5233         |                  |                  | 70.0287         | 35.5180          | S    |                  |                 |                 |                  |                 |                  | 17 |
| 2  | 189.0870        | 95.0471         |                  |                  | 171.0764        | 86.0418          | T    | 1619.8024        | 810.4048        | 1602.7758       | 801.8916         | 1601.7918       | 801.3995         | 16 |
| 3  | 258.1084        | 129.5579        |                  |                  | 240.0979        | 120.5526         | S    | 1518.7547        | <b>759.8810</b> | 1501.7281       | <b>751.3677</b>  | 1500.7441       | <b>750.8757</b>  | 15 |
| 4  | 355.1612        | 178.0842        |                  |                  | 337.1506        | 169.0790         | P    | <b>1449.7332</b> | <b>725.3703</b> | 1432.7067       | <b>716.8570</b>  | 1431.7227       | <b>716.3650</b>  | 14 |
| 5  | <b>426.1983</b> | 213.6028        |                  |                  | <b>408.1878</b> | 204.5975         | A    | 1352.6805        | 676.8439        | 1335.6539       | 668.3306         | 1334.6699       | 667.8386         | 13 |
| 6  | 523.2511        | 262.1292        |                  |                  | 505.2405        | 253.1239         | P    | <b>1281.6434</b> | <b>641.3253</b> | 1264.6168       | <b>632.8120</b>  | 1263.6328       | <b>632.3200</b>  | 12 |
| 7  | <b>594.2882</b> | 297.6477        |                  |                  | <b>576.2776</b> | <b>288.6425</b>  | A    | <b>1184.5906</b> | 592.7989        | 1167.5640       | 584.2857         | 1166.5800       | 583.7937         | 11 |
| 8  | 709.3151        | 355.1612        |                  |                  | 691.3046        | 346.1559         | D    | <b>1113.5535</b> | 557.2804        | 1096.5269       | 548.7671         | 1095.5429       | 548.2751         | 10 |
| 9  | 808.3836        | 404.6954        |                  |                  | <b>790.3730</b> | <b>395.6901</b>  | V    | <b>998.5265</b>  | 499.7669        | 981.5000        | <b>491.2536</b>  | 980.5160        | 490.7616         | 9  |
| 10 | <b>879.4207</b> | <b>440.2140</b> |                  |                  | <b>861.4101</b> | 431.2087         | A    | 899.4581         | 450.2327        | 882.4316        | 441.7194         | <b>881.4476</b> | 441.2274         | 8  |
| 11 | 976.4734        | 488.7404        |                  |                  | 958.4629        | 479.7351         | P    | <b>828.4210</b>  | 414.7141        | 811.3945        | 406.2009         | 810.4104        | 405.7089         | 7  |
| 12 | 1047.5106       | <b>524.2589</b> |                  |                  | 1029.5000       | 515.2536         | A    | <b>731.3682</b>  | <b>366.1878</b> | 714.3417        | 357.6745         | <b>713.3577</b> | 357.1825         | 6  |
| 13 | 1175.5691       | 588.2882        | 1158.5426        | 579.7749         | 1157.5586       | 579.2829         | Q    | <b>660.3311</b>  | 330.6692        | <b>643.3046</b> | 322.1559         | 642.3206        | 321.6639         | 5  |
| 14 | 1304.6117       | 652.8095        | 1287.5852        | 644.2962         | 1286.6012       | <b>643.8042</b>  | E    | <b>532.2726</b>  | 266.6399        | 515.2460        | 258.1266         | 514.2620        | 257.6346         | 4  |
| 15 | 1419.6387       | 710.3230        | <b>1402.6121</b> | 701.8097         | 1401.6281       | 701.3177         | D    | <b>403.2300</b>  | 202.1186        | 386.2034        | 193.6053         | 385.2194        | 193.1133         | 3  |
| 16 | 1532.7227       | 766.8650        | 1515.6962        | 758.3517         | 1514.7122       | 757.8597         | L    | <b>288.2030</b>  | 144.6051        | 271.1765        | 136.0919         |                 |                  | 2  |
| 17 |                 |                 |                  |                  |                 |                  | R    | 175.1190         | 88.0631         | 158.0924        | 79.5498          |                 |                  | 1  |

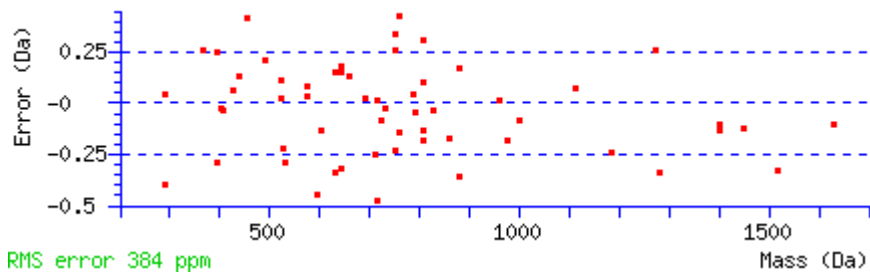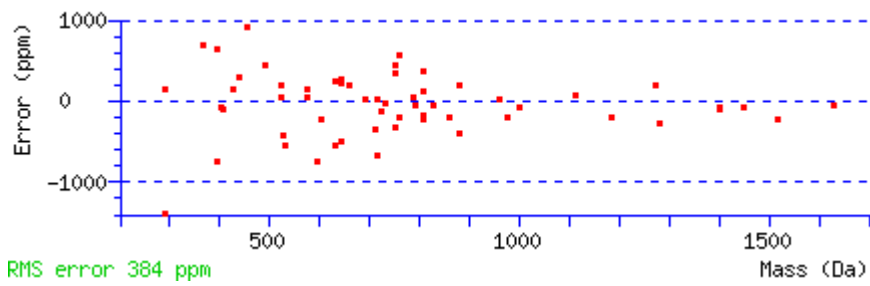

IDENTIFICATION 66

MS/MS Fragmentation of **SSGSPYGGGYGSGGGSGGYGSR**

Found in **IPI00269661**

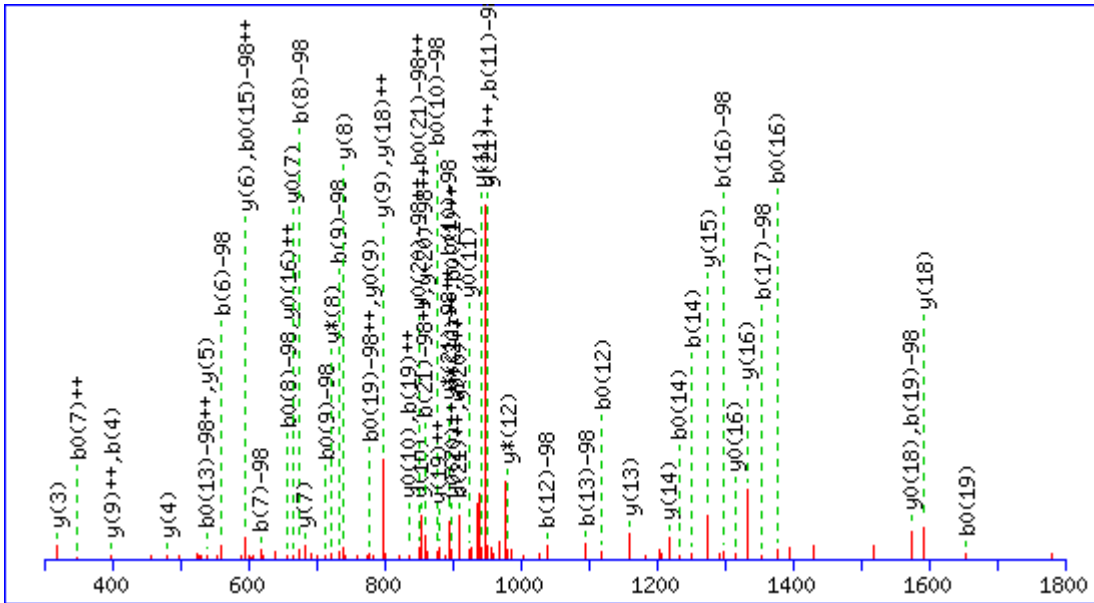

Monoisotopic mass of neutral peptide  $M_r(\text{calc})$ : 1989.7491

Fixed modifications: Carbamidomethyl (C) (apply to specified residues or termini only)

Variable modifications:

S4 : Phospho (ST), with neutral losses 97.9769 (shown in table), 0.0000

Ions Score: 82 Expect: 9.6e-07 (help)

| #  | b         | b <sup>++</sup> | b <sup>0</sup> | b <sup>0++</sup> | Seq. | y         | y <sup>++</sup> | y <sup>*</sup> | y <sup>+++</sup> | y <sup>0</sup> | y <sup>0++</sup> | #  |
|----|-----------|-----------------|----------------|------------------|------|-----------|-----------------|----------------|------------------|----------------|------------------|----|
| 1  | 88.0393   | 44.5233         | 70.0287        | 35.5180          | S    |           |                 |                |                  |                |                  | 22 |
| 2  | 175.0713  | 88.0393         | 157.0608       | 79.0340          | S    | 1805.7474 | 903.3773        | 1788.7208      | 894.8641         | 1787.7368      | 894.3720         | 21 |
| 3  | 232.0928  | 116.5500        | 214.0822       | 107.5448         | G    | 1718.7154 | 859.8613        | 1701.6888      | 851.3480         | 1700.7048      | 850.8560         | 20 |
| 4  | 301.1143  | 151.0608        | 283.1037       | 142.0555         | S    | 1661.6939 | 831.3506        | 1644.6673      | 822.8373         | 1643.6833      | 822.3453         | 19 |
| 5  | 398.1670  | 199.5871        | 380.1565       | 190.5819         | P    | 1592.6724 | 796.8399        | 1575.6459      | 788.3266         | 1574.6619      | 787.8346         | 18 |
| 6  | 561.2304  | 281.1188        | 543.2198       | 272.1135         | Y    | 1495.6197 | 748.3135        | 1478.5931      | 739.8002         | 1477.6091      | 739.3082         | 17 |
| 7  | 618.2518  | 309.6295        | 600.2413       | 300.6243         | G    | 1332.5563 | 666.7818        | 1315.5298      | 658.2685         | 1314.5458      | 657.7765         | 16 |
| 8  | 675.2733  | 338.1403        | 657.2627       | 329.1350         | G    | 1275.5349 | 638.2711        | 1258.5083      | 629.7578         | 1257.5243      | 629.2658         | 15 |
| 9  | 732.2947  | 366.6510        | 714.2842       | 357.6457         | G    | 1218.5134 | 609.7603        | 1201.4869      | 601.2471         | 1200.5028      | 600.7551         | 14 |
| 10 | 895.3581  | 448.1827        | 877.3475       | 439.1774         | Y    | 1161.4919 | 581.2496        | 1144.4654      | 572.7363         | 1143.4814      | 572.2443         | 13 |
| 11 | 952.3795  | 476.6934        | 934.3690       | 467.6881         | G    | 998.4286  | 499.7179        | 981.4021       | 491.2047         | 980.4180       | 490.7127         | 12 |
| 12 | 1039.4116 | 520.2094        | 1021.4010      | 511.2041         | S    | 941.4071  | 471.2072        | 924.3806       | 462.6939         | 923.3966       | 462.2019         | 11 |
| 13 | 1096.4330 | 548.7202        | 1078.4225      | 539.7149         | G    | 854.3751  | 427.6912        | 837.3486       | 419.1779         | 836.3646       | 418.6859         | 10 |
| 14 | 1153.4545 | 577.2309        | 1135.4439      | 568.2256         | G    | 797.3537  | 399.1805        | 780.3271       | 390.6672         | 779.3431       | 390.1752         | 9  |
| 15 | 1210.4760 | 605.7416        | 1192.4654      | 596.7363         | G    | 740.3322  | 370.6697        | 723.3056       | 362.1565         | 722.3216       | 361.6645         | 8  |
| 16 | 1297.5080 | 649.2576        | 1279.4974      | 640.2523         | S    | 683.3107  | 342.1590        | 666.2842       | 333.6457         | 665.3002       | 333.1537         | 7  |
| 17 | 1354.5294 | 677.7684        | 1336.5189      | 668.7631         | G    | 596.2787  | 298.6430        | 579.2522       | 290.1297         | 578.2681       | 289.6377         | 6  |
| 18 | 1411.5509 | 706.2791        | 1393.5403      | 697.2738         | G    | 539.2572  | 270.1323        | 522.2307       | 261.6190         | 521.2467       | 261.1270         | 5  |
| 19 | 1574.6142 | 787.8108        | 1556.6037      | 778.8055         | Y    | 482.2358  | 241.6215        | 465.2092       | 233.1082         | 464.2252       | 232.6162         | 4  |
| 20 | 1631.6357 | 816.3215        | 1613.6251      | 807.3162         | G    | 319.1724  | 160.0899        | 302.1459       | 151.5766         | 301.1619       | 151.0846         | 3  |
| 21 | 1718.6677 | 859.8375        | 1700.6572      | 850.8322         | S    | 262.1510  | 131.5791        | 245.1244       | 123.0659         | 244.1404       | 122.5738         | 2  |
| 22 |           |                 |                |                  | R    | 175.1190  | 88.0631         | 158.0924       | 79.5498          |                |                  | 1  |

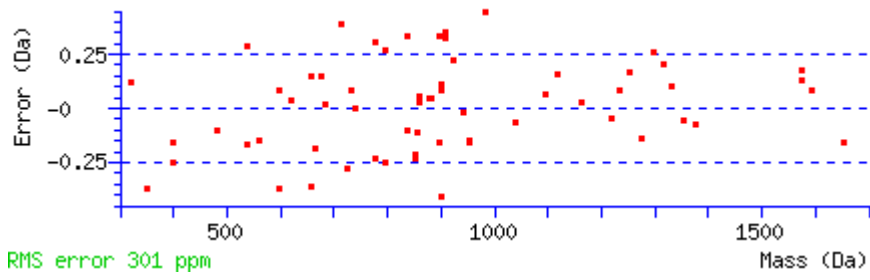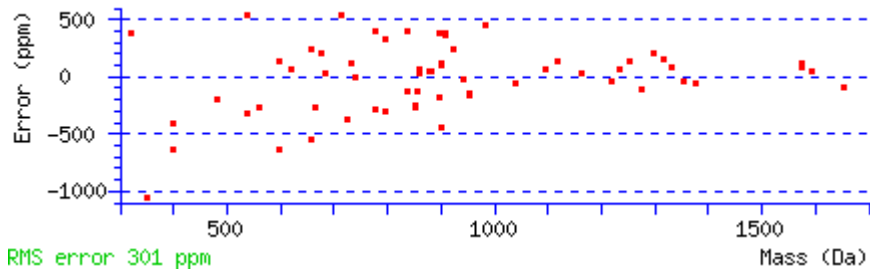

IDENTIFICATION 67

MS/MS Fragmentation of  
TIGISVDPR

Found in

IPI00134097

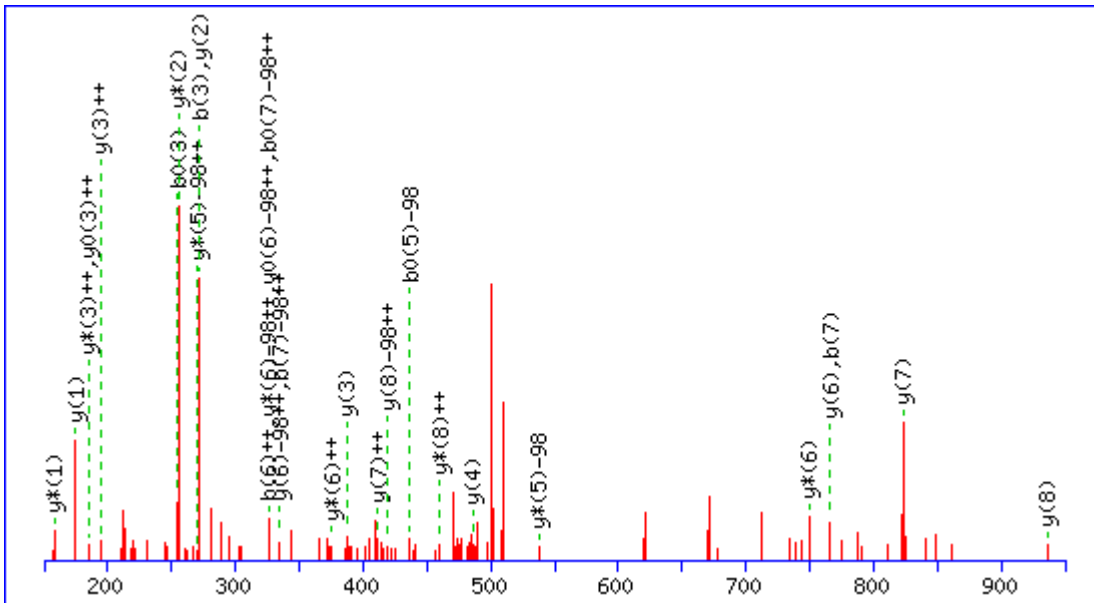

Monoisotopic mass of neutral peptide Mr(calc): 1036.4954

Fixed modifications: Carbamidomethyl (C) (apply to specified residues or termini only)

Variable modifications:

S5 : Phospho (ST), with neutral losses 0.0000(shown in table), 97.9769

Ions Score: 35 Expect: 0.024 (help)

| # | b        | b <sup>++</sup> | b <sup>0</sup> | b <sup>0++</sup> | Seq. | y        | y <sup>++</sup> | y <sup>*</sup> | y <sup>+++</sup> | y <sup>0</sup> | y <sup>0++</sup> | # |
|---|----------|-----------------|----------------|------------------|------|----------|-----------------|----------------|------------------|----------------|------------------|---|
| 1 | 102.0550 | 51.5311         | 84.0444        | 42.5258          | T    |          |                 |                |                  |                |                  | 9 |
| 2 | 215.1390 | 108.0731        | 197.1285       | 99.0679          | I    | 936.4550 | 468.7312        | 919.4285       | 460.2179         | 918.4445       | 459.7259         | 8 |
| 3 | 272.1605 | 136.5839        | 254.1499       | 127.5786         | G    | 823.3710 | 412.1891        | 806.3444       | 403.6758         | 805.3604       | 403.1838         | 7 |
| 4 | 385.2445 | 193.1259        | 367.2340       | 184.1206         | I    | 766.3495 | 383.6784        | 749.3229       | 375.1651         | 748.3389       | 374.6731         | 6 |
| 5 | 552.2429 | 276.6251        | 534.2323       | 267.6198         | S    | 653.2654 | 327.1364        | 636.2389       | 318.6231         | 635.2549       | 318.1311         | 5 |
| 6 | 651.3113 | 326.1593        | 633.3008       | 317.1540         | V    | 486.2671 | 243.6372        | 469.2405       | 235.1239         | 468.2565       | 234.6319         | 4 |
| 7 | 766.3383 | 383.6728        | 748.3277       | 374.6675         | D    | 387.1987 | 194.1030        | 370.1721       | 185.5897         | 369.1881       | 185.0977         | 3 |
| 8 | 863.3910 | 432.1992        | 845.3805       | 423.1939         | P    | 272.1717 | 136.5895        | 255.1452       | 128.0762         |                |                  | 2 |
| 9 |          |                 |                |                  | R    | 175.1190 | 88.0631         | 158.0924       | 79.5498          |                |                  | 1 |



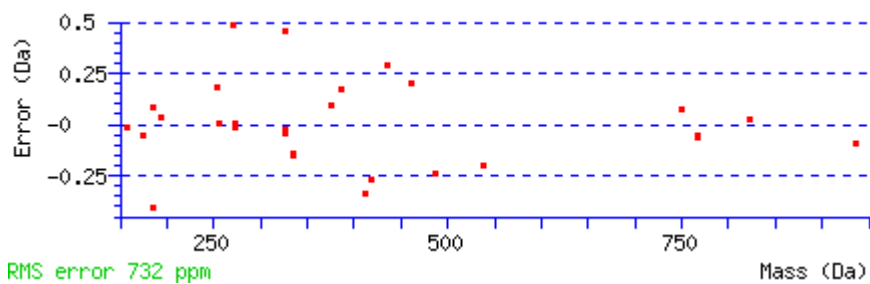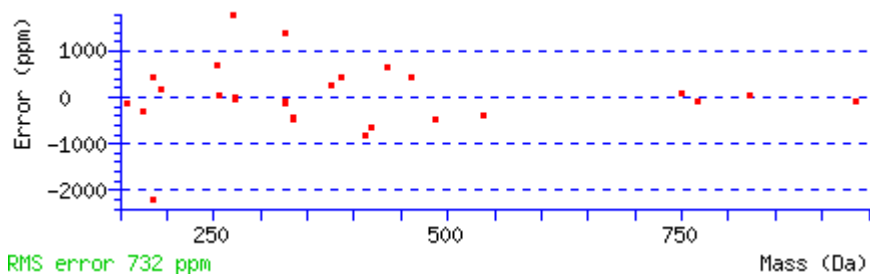

IDENTIFICATION 68

MS/MS Fragmentation of **LPSGSGPASPTTGSAVDIR**

Found in **IPI00553798**

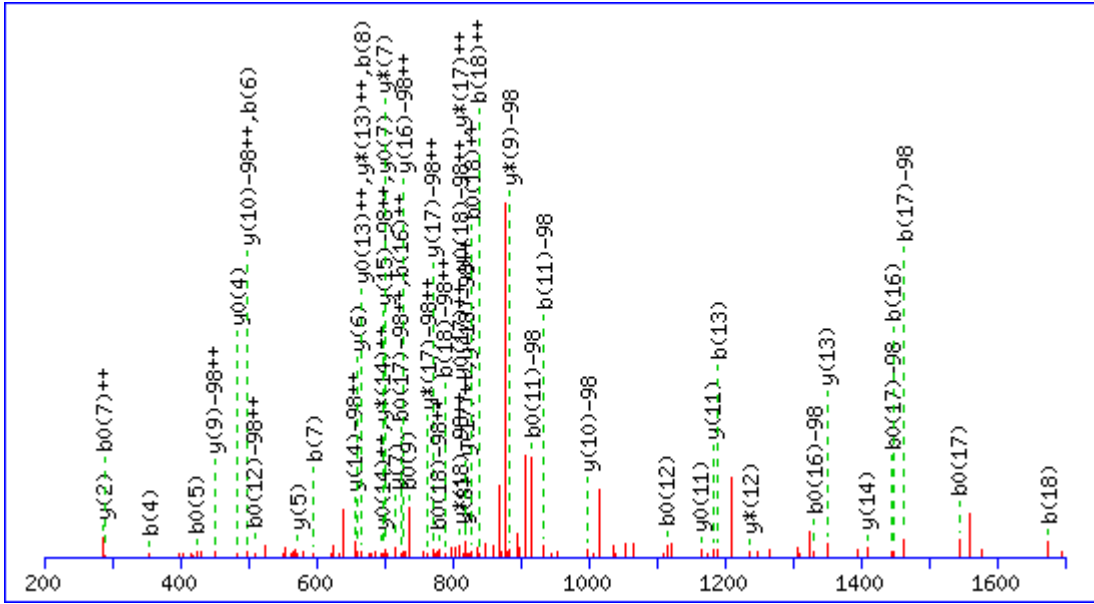

Monoisotopic mass of neutral peptide Mr(calc): 1848.8619

Fixed modifications: Carbamidomethyl (C) (apply to specified residues or termini only)

Variable modifications:

T11 : Phospho (ST), with neutral losses 97.9769 (shown in table), 0.0000

Ions Score: 33 Expect: 0.09 (help)

| #  | b         | b <sup>++</sup> | b <sup>0</sup> | b <sup>0++</sup> | Seq. | y         | y <sup>++</sup> | y <sup>*</sup> | y <sup>+++</sup> | y <sup>0</sup> | y <sup>0++</sup> | #  |
|----|-----------|-----------------|----------------|------------------|------|-----------|-----------------|----------------|------------------|----------------|------------------|----|
| 1  | 114.0913  | 57.5493         |                |                  | L    |           |                 |                |                  |                |                  | 19 |
| 2  | 211.1441  | 106.0757        |                |                  | P    | 1638.8082 | 819.9077        | 1621.7816      | 811.3945         | 1620.7976      | 810.9025         | 18 |
| 3  | 298.1761  | 149.5917        | 280.1656       | 140.5864         | S    | 1541.7554 | 771.3814        | 1524.7289      | 762.8681         | 1523.7449      | 762.3761         | 17 |
| 4  | 355.1976  | 178.1024        | 337.1870       | 169.0972         | G    | 1454.7234 | 727.8653        | 1437.6968      | 719.3521         | 1436.7128      | 718.8601         | 16 |
| 5  | 442.2296  | 221.6184        | 424.2191       | 212.6132         | S    | 1397.7019 | 699.3546        | 1380.6754      | 690.8413         | 1379.6914      | 690.3493         | 15 |
| 6  | 499.2511  | 250.1292        | 481.2405       | 241.1239         | G    | 1310.6699 | 655.8386        | 1293.6434      | 647.3253         | 1292.6593      | 646.8333         | 14 |
| 7  | 596.3039  | 298.6556        | 578.2933       | 289.6503         | P    | 1253.6484 | 627.3279        | 1236.6219      | 618.8146         | 1235.6379      | 618.3226         | 13 |
| 8  | 667.3410  | 334.1741        | 649.3304       | 325.1688         | A    | 1156.5957 | 578.8015        | 1139.5691      | 570.2882         | 1138.5851      | 569.7962         | 12 |
| 9  | 754.3730  | 377.6901        | 736.3624       | 368.6849         | S    | 1085.5586 | 543.2829        | 1068.5320      | 534.7696         | 1067.5480      | 534.2776         | 11 |
| 10 | 851.4258  | 426.2165        | 833.4152       | 417.2112         | P    | 998.5265  | 499.7669        | 981.5000       | 491.2536         | 980.5160       | 490.7616         | 10 |
| 11 | 934.4629  | 467.7351        | 916.4523       | 458.7298         | T    | 901.4738  | 451.2405        | 884.4472       | 442.7272         | 883.4632       | 442.2352         | 9  |
| 12 | 1035.5106 | 518.2589        | 1017.5000      | 509.2536         | T    | 818.4367  | 409.7220        | 801.4101       | 401.2087         | 800.4261       | 400.7167         | 8  |
| 13 | 1092.5320 | 546.7696        | 1074.5214      | 537.7644         | G    | 717.3890  | 359.1981        | 700.3624       | 350.6849         | 699.3784       | 350.1928         | 7  |
| 14 | 1179.5640 | 590.2857        | 1161.5535      | 581.2804         | S    | 660.3675  | 330.6874        | 643.3410       | 322.1741         | 642.3570       | 321.6821         | 6  |
| 15 | 1250.6012 | 625.8042        | 1232.5906      | 616.7989         | A    | 573.3355  | 287.1714        | 556.3089       | 278.6581         | 555.3249       | 278.1661         | 5  |
| 16 | 1349.6696 | 675.3384        | 1331.6590      | 666.3331         | V    | 502.2984  | 251.6528        | 485.2718       | 243.1395         | 484.2878       | 242.6475         | 4  |
| 17 | 1464.6965 | 732.8519        | 1446.6859      | 723.8466         | D    | 403.2300  | 202.1186        | 386.2034       | 193.6053         | 385.2194       | 193.1133         | 3  |
| 18 | 1577.7806 | 789.3939        | 1559.7700      | 780.3886         | I    | 288.2030  | 144.6051        | 271.1765       | 136.0919         |                |                  | 2  |
| 19 |           |                 |                |                  | R    | 175.1190  | 88.0631         | 158.0924       | 79.5498          |                |                  | 1  |

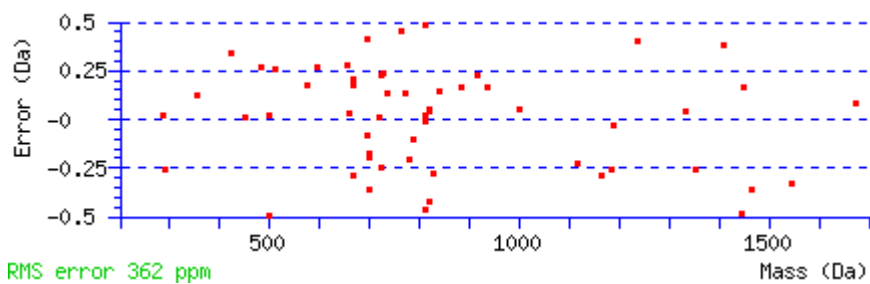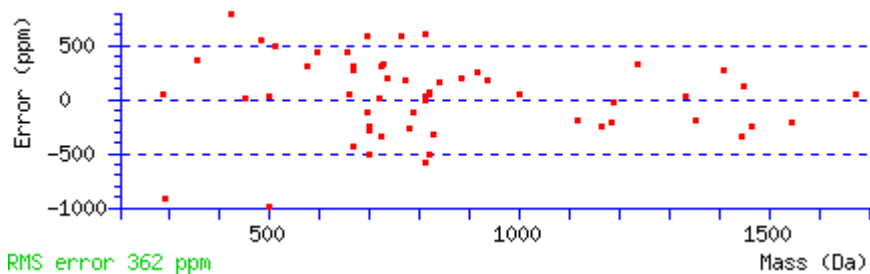

IDENTIFICATION 69

MS/MS Fragmentation of **QPPTVTK**

Found in **IPI00416315**

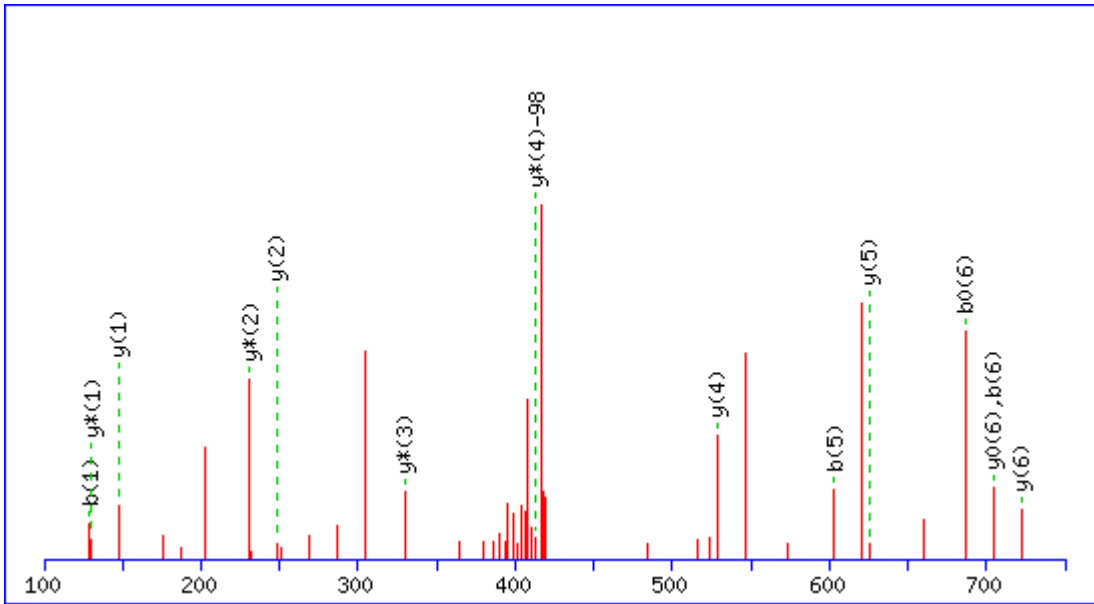

Monoisotopic mass of neutral peptide  $M_r(\text{calc})$ : 849.3997

Fixed modifications: Carbamidomethyl (C) (apply to specified residues or termini only)

Variable modifications:

T4 : Phospho (ST), with neutral losses 0.0000 (shown in table), 97.9769

Ions Score: 29 Expect: 0.11 (help)

| # | b        | b <sup>++</sup> | b <sup>*</sup> | b <sup>+++</sup> | b <sup>0</sup> | b <sup>0++</sup> | Seq. | y        | y <sup>++</sup> | y <sup>*</sup> | y <sup>+++</sup> | y <sup>0</sup> | y <sup>0++</sup> | # |
|---|----------|-----------------|----------------|------------------|----------------|------------------|------|----------|-----------------|----------------|------------------|----------------|------------------|---|
| 1 | 129.0659 | 65.0366         | 112.0393       | 56.5233          |                |                  | Q    |          |                 |                |                  |                |                  | 7 |
| 2 | 226.1186 | 113.5629        | 209.0921       | 105.0497         |                |                  | P    | 722.3484 | 361.6779        | 705.3219       | 353.1646         | 704.3379       | 352.6726         | 6 |
| 3 | 323.1714 | 162.0893        | 306.1448       | 153.5761         |                |                  | P    | 625.2957 | 313.1515        | 608.2691       | 304.6382         | 607.2851       | 304.1462         | 5 |
| 4 | 504.1854 | 252.5963        | 487.1588       | 244.0831         | 486.1748       | 243.5911         | T    | 528.2429 | 264.6251        | 511.2164       | 256.1118         | 510.2323       | 255.6198         | 4 |
| 5 | 603.2538 | 302.1305        | 586.2273       | 293.6173         | 585.2432       | 293.1253         | V    | 347.2289 | 174.1181        | 330.2023       | 165.6048         | 329.2183       | 165.1128         | 3 |
| 6 | 704.3015 | 352.6544        | 687.2749       | 344.1411         | 686.2909       | 343.6491         | T    | 248.1605 | 124.5839        | 231.1339       | 116.0706         | 230.1499       | 115.5786         | 2 |
| 7 |          |                 |                |                  |                |                  | K    | 147.1128 | 74.0600         | 130.0863       | 65.5468          |                |                  | 1 |

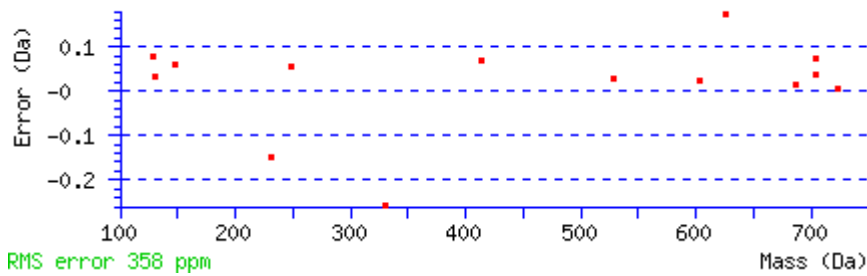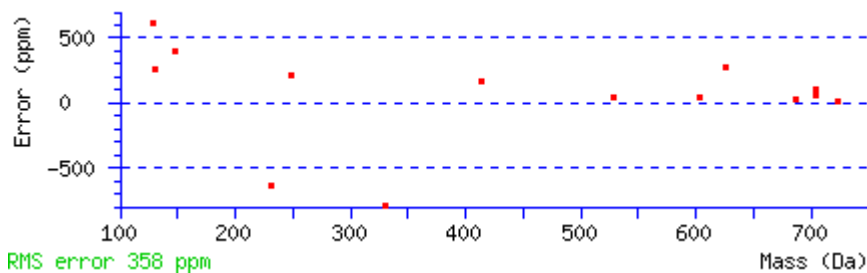

IDENTIFICATION 70

MS/MS Fragmentation of **KGTGDCSDEVDGK**

Found in **IPI00123181**

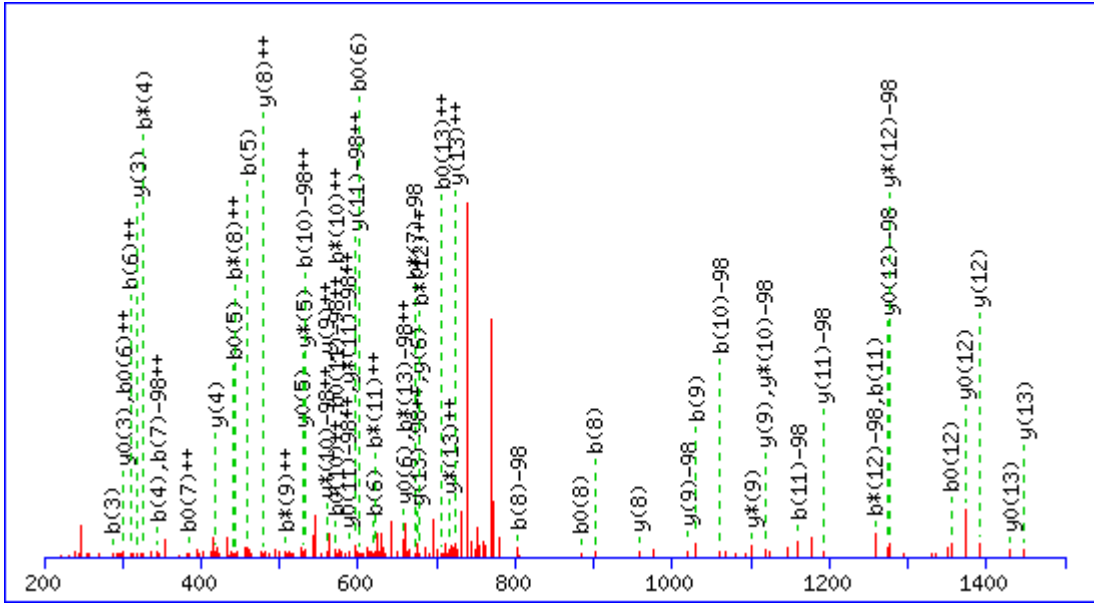

Monoisotopic mass of neutral peptide  $M_r(\text{calc})$ : 1575.5760

Fixed modifications: Carbamidomethyl (C) (apply to specified residues or termini only)

Variable modifications:

S7 : Phospho (ST), with neutral losses 0.0000 (shown in table), 97.9769

Ions Score: 28 Expect: 0.13 (help)

| #  | b         | b <sup>++</sup> | b <sup>*</sup> | b <sup>+++</sup> | b <sup>0</sup> | b <sup>0++</sup> | Seq. | y         | y <sup>++</sup> | y <sup>*</sup> | y <sup>+++</sup> | y <sup>0</sup> | y <sup>0++</sup> | #  |
|----|-----------|-----------------|----------------|------------------|----------------|------------------|------|-----------|-----------------|----------------|------------------|----------------|------------------|----|
| 1  | 129.1022  | 65.0548         | 112.0757       | 56.5415          |                |                  | K    |           |                 |                |                  |                |                  | 14 |
| 2  | 186.1237  | 93.5655         | 169.0972       | 85.0522          |                |                  | G    | 1448.4883 | 724.7478        | 1431.4618      | 716.2345         | 1430.4777      | 715.7425         | 13 |
| 3  | 287.1714  | 144.0893        | 270.1448       | 135.5761         | 269.1608       | 135.0840         | T    | 1391.4668 | 696.2371        | 1374.4403      | 687.7238         | 1373.4563      | 687.2318         | 12 |
| 4  | 344.1928  | 172.6001        | 327.1663       | 164.0868         | 326.1823       | 163.5948         | G    | 1290.4192 | 645.7132        | 1273.3926      | 637.1999         | 1272.4086      | 636.7079         | 11 |
| 5  | 459.2198  | 230.1135        | 442.1932       | 221.6003         | 441.2092       | 221.1082         | D    | 1233.3977 | 617.2025        | 1216.3712      | 608.6892         | 1215.3871      | 608.1972         | 10 |
| 6  | 619.2504  | 310.1289        | 602.2239       | 301.6156         | 601.2399       | 301.1236         | C    | 1118.3708 | 559.6890        | 1101.3442      | 551.1757         | 1100.3602      | 550.6837         | 9  |
| 7  | 786.2488  | 393.6280        | 769.2222       | 385.1148         | 768.2382       | 384.6228         | S    | 958.3401  | 479.6737        | 941.3136       | 471.1604         | 940.3295       | 470.6684         | 8  |
| 8  | 901.2757  | 451.1415        | 884.2492       | 442.6282         | 883.2652       | 442.1362         | D    | 791.3418  | 396.1745        | 774.3152       | 387.6612         | 773.3312       | 387.1692         | 7  |
| 9  | 1030.3183 | 515.6628        | 1013.2918      | 507.1495         | 1012.3078      | 506.6575         | E    | 676.3148  | 338.6610        | 659.2883       | 330.1478         | 658.3042       | 329.6558         | 6  |
| 10 | 1159.3609 | 580.1841        | 1142.3344      | 571.6708         | 1141.3504      | 571.1788         | E    | 547.2722  | 274.1397        | 530.2457       | 265.6265         | 529.2617       | 265.1345         | 5  |
| 11 | 1258.4293 | 629.7183        | 1241.4028      | 621.2050         | 1240.4188      | 620.7130         | V    | 418.2296  | 209.6185        | 401.2031       | 201.1052         | 400.2191       | 200.6132         | 4  |
| 12 | 1373.4563 | 687.2318        | 1356.4297      | 678.7185         | 1355.4457      | 678.2265         | D    | 319.1612  | 160.0842        | 302.1347       | 151.5710         | 301.1506       | 151.0790         | 3  |
| 13 | 1430.4777 | 715.7425        | 1413.4512      | 707.2292         | 1412.4672      | 706.7372         | G    | 204.1343  | 102.5708        | 187.1077       | 94.0575          |                |                  | 2  |
| 14 |           |                 |                |                  |                |                  | K    | 147.1128  | 74.0600         | 130.0863       | 65.5468          |                |                  | 1  |

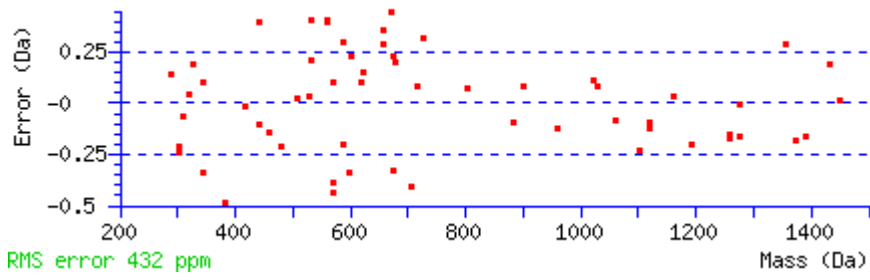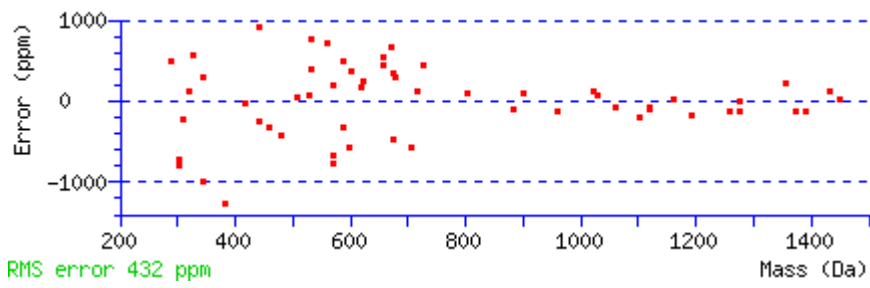

IDENTIFICATION 71

MS/MS Fragmentation of **FWYFVSQLKK**

Found in **IPI00162790**

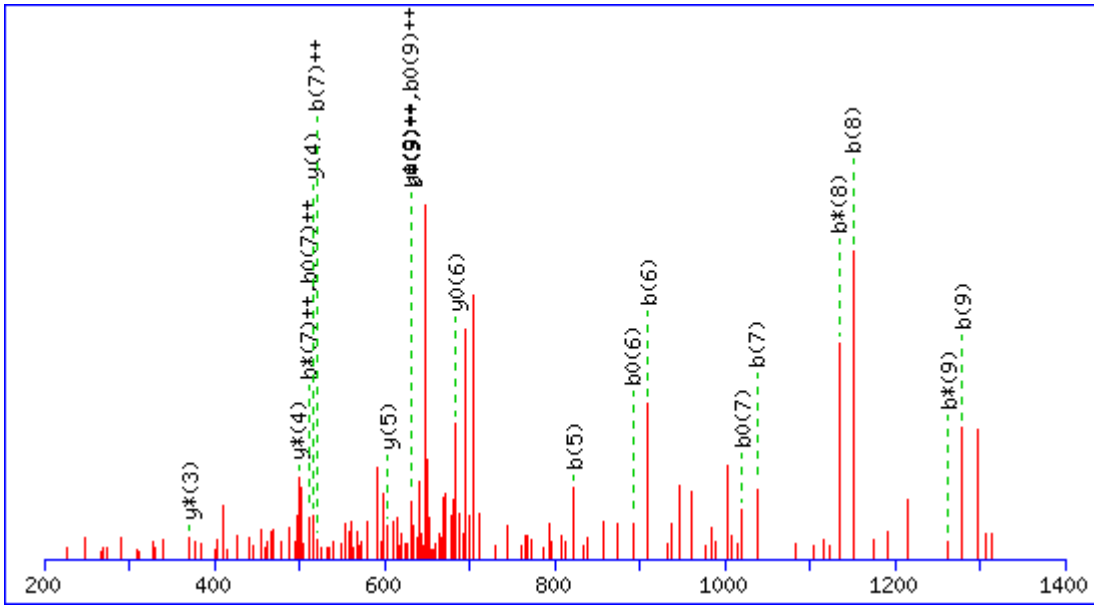

Monoisotopic mass of neutral peptide  $M_r(\text{calc})$ : 1424.6894

Fixed modifications: Carbamidomethyl (C) (apply to specified residues or termini only)

Variable modifications:

Y3 : Phospho (Y)

Ions Score: 22 Expect: 0.71 (help)

| #  | b         | b <sup>++</sup> | b <sup>*</sup> | b <sup>+++</sup> | b <sup>0</sup> | b <sup>0++</sup> | Seq. | y         | y <sup>++</sup> | y <sup>*</sup> | y <sup>+++</sup> | y <sup>0</sup> | y <sup>0++</sup> | #  |
|----|-----------|-----------------|----------------|------------------|----------------|------------------|------|-----------|-----------------|----------------|------------------|----------------|------------------|----|
| 1  | 148.0757  | 74.5415         |                |                  |                |                  | F    |           |                 |                |                  |                |                  | 10 |
| 2  | 334.1550  | 167.5811        |                |                  |                |                  | W    | 1278.6282 | 639.8178        | 1261.6017      | 631.3045         | 1260.6177      | 630.8125         | 9  |
| 3  | 577.1847  | 289.0960        |                |                  |                |                  | Y    | 1092.5489 | 546.7781        | 1075.5224      | 538.2648         | 1074.5384      | 537.7728         | 8  |
| 4  | 724.2531  | 362.6302        |                |                  |                |                  | F    | 849.5193  | 425.2633        | 832.4927       | 416.7500         | 831.5087       | 416.2580         | 7  |
| 5  | 823.3215  | 412.1644        |                |                  |                |                  | V    | 702.4509  | 351.7291        | 685.4243       | 343.2158         | 684.4403       | 342.7238         | 6  |
| 6  | 910.3535  | 455.6804        |                |                  | 892.3430       | 446.6751         | S    | 603.3824  | 302.1949        | 586.3559       | 293.6816         | 585.3719       | 293.1896         | 5  |
| 7  | 1038.4121 | 519.7097        | 1021.3855      | 511.1964         | 1020.4015      | 510.7044         | Q    | 516.3504  | 258.6788        | 499.3239       | 250.1656         |                |                  | 4  |
| 8  | 1151.4962 | 576.2517        | 1134.4696      | 567.7384         | 1133.4856      | 567.2464         | L    | 388.2918  | 194.6496        | 371.2653       | 186.1363         |                |                  | 3  |
| 9  | 1279.5911 | 640.2992        | 1262.5646      | 631.7859         | 1261.5806      | 631.2939         | K    | 275.2078  | 138.1075        | 258.1812       | 129.5942         |                |                  | 2  |
| 10 |           |                 |                |                  |                |                  | K    | 147.1128  | 74.0600         | 130.0863       | 65.5468          |                |                  | 1  |

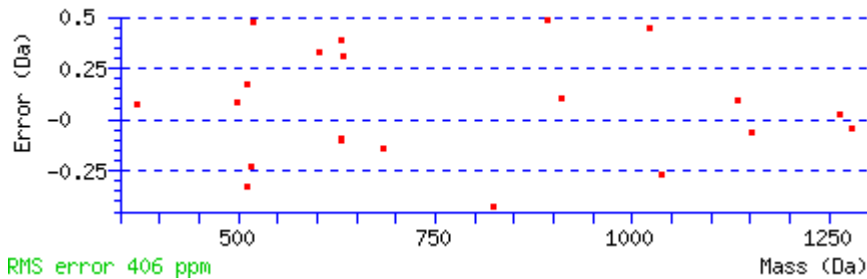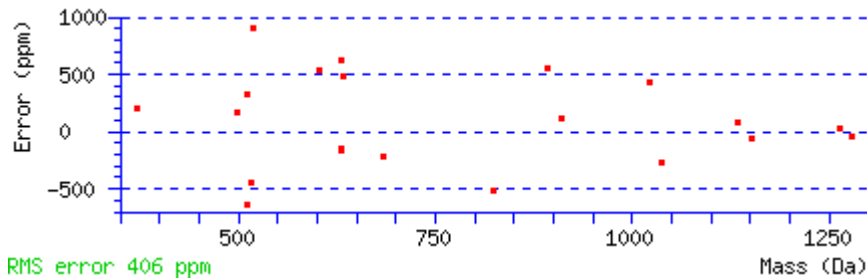

IDENTIFICATION 72

MS/MS Fragmentation of **RPMEEDGEKSPSK**

Found in **IPI00130591**

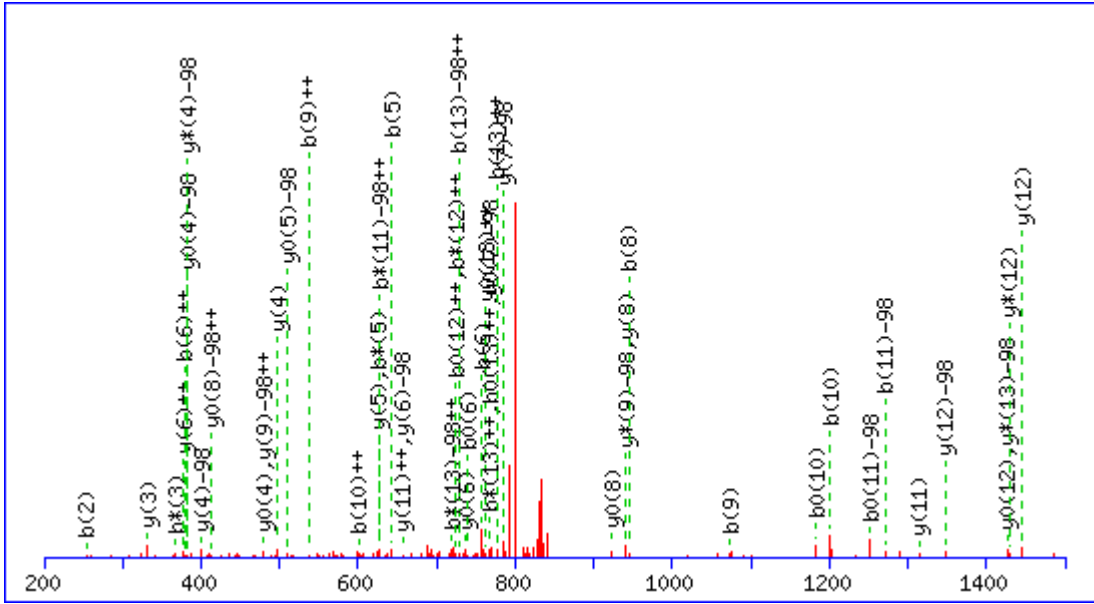

Monoisotopic mass of neutral peptide Mr(calc): 1697.6967

Fixed modifications: Carbamidomethyl (C) (apply to specified residues or termini only)

Variable modifications:

S11 : Phospho (ST), with neutral losses 97.9769 (shown in table), 0.0000

Ions Score: 26 Expect: 0.32 (help)

| #  | b         | b <sup>++</sup> | b <sup>*</sup> | b <sup>+++</sup> | b <sup>0</sup> | b <sup>0++</sup> | Seq. | y         | y <sup>++</sup> | y <sup>*</sup> | y <sup>*++</sup> | y <sup>0</sup> | y <sup>0++</sup> | #  |
|----|-----------|-----------------|----------------|------------------|----------------|------------------|------|-----------|-----------------|----------------|------------------|----------------|------------------|----|
| 1  | 157.1084  | 79.0578         | 140.0818       | 70.5446          |                |                  | R    |           |                 |                |                  |                |                  | 14 |
| 2  | 254.1612  | 127.5842        | 237.1346       | 119.0709         |                |                  | P    | 1444.6261 | 722.8167        | 1427.5995      | 714.3034         | 1426.6155      | 713.8114         | 13 |
| 3  | 385.2016  | 193.1045        | 368.1751       | 184.5912         |                |                  | M    | 1347.5733 | 674.2903        | 1330.5467      | 665.7770         | 1329.5627      | 665.2850         | 12 |
| 4  | 514.2442  | 257.6258        | 497.2177       | 249.1125         | 496.2337       | 248.6205         | E    | 1216.5328 | 608.7700        | 1199.5063      | 600.2568         | 1198.5222      | 599.7648         | 11 |
| 5  | 643.2868  | 322.1470        | 626.2603       | 313.6338         | 625.2763       | 313.1418         | E    | 1087.4902 | 544.2487        | 1070.4637      | 535.7355         | 1069.4796      | 535.2435         | 10 |
| 6  | 758.3138  | 379.6605        | 741.2872       | 371.1472         | 740.3032       | 370.6552         | D    | 958.4476  | 479.7274        | 941.4211       | 471.2142         | 940.4371       | 470.7222         | 9  |
| 7  | 815.3352  | 408.1713        | 798.3087       | 399.6580         | 797.3247       | 399.1660         | G    | 843.4207  | 422.2140        | 826.3941       | 413.7007         | 825.4101       | 413.2087         | 8  |
| 8  | 944.3778  | 472.6925        | 927.3513       | 464.1793         | 926.3673       | 463.6873         | E    | 786.3992  | 393.7032        | 769.3727       | 385.1900         | 768.3886       | 384.6980         | 7  |
| 9  | 1073.4204 | 537.2138        | 1056.3939      | 528.7006         | 1055.4099      | 528.2086         | E    | 657.3566  | 329.1819        | 640.3301       | 320.6687         | 639.3461       | 320.1767         | 6  |
| 10 | 1201.5154 | 601.2613        | 1184.4888      | 592.7481         | 1183.5048      | 592.2560         | K    | 528.3140  | 264.6606        | 511.2875       | 256.1474         | 510.3035       | 255.6554         | 5  |
| 11 | 1270.5368 | 635.7721        | 1253.5103      | 627.2588         | 1252.5263      | 626.7668         | S    | 400.2191  | 200.6132        | 383.1925       | 192.0999         | 382.2085       | 191.6079         | 4  |
| 12 | 1367.5896 | 684.2984        | 1350.5631      | 675.7852         | 1349.5790      | 675.2932         | P    | 331.1976  | 166.1024        | 314.1710       | 157.5892         | 313.1870       | 157.0972         | 3  |
| 13 | 1454.6216 | 727.8145        | 1437.5951      | 719.3012         | 1436.6111      | 718.8092         | S    | 234.1448  | 117.5761        | 217.1183       | 109.0628         | 216.1343       | 108.5708         | 2  |
| 14 |           |                 |                |                  |                |                  | K    | 147.1128  | 74.0600         | 130.0863       | 65.5468          |                |                  | 1  |



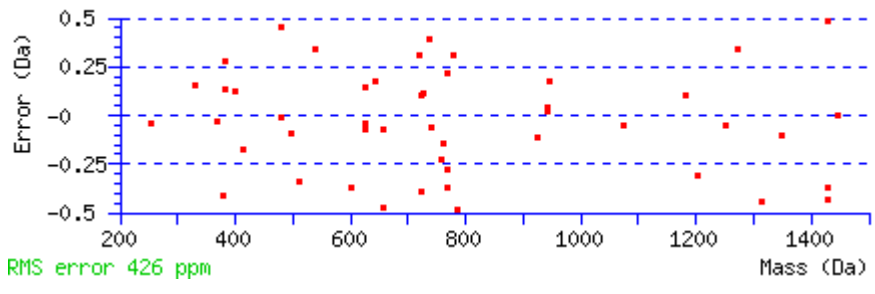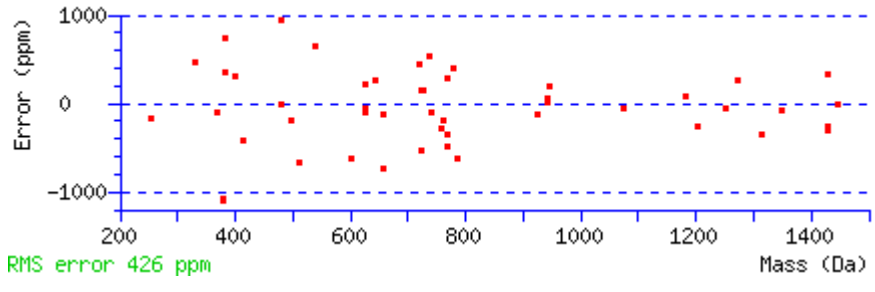

IDENTIFICATION 73

MS/MS Fragmentation of **PGPTPSGTNVGSSGRSPSK**

Found in **IPI00133030**

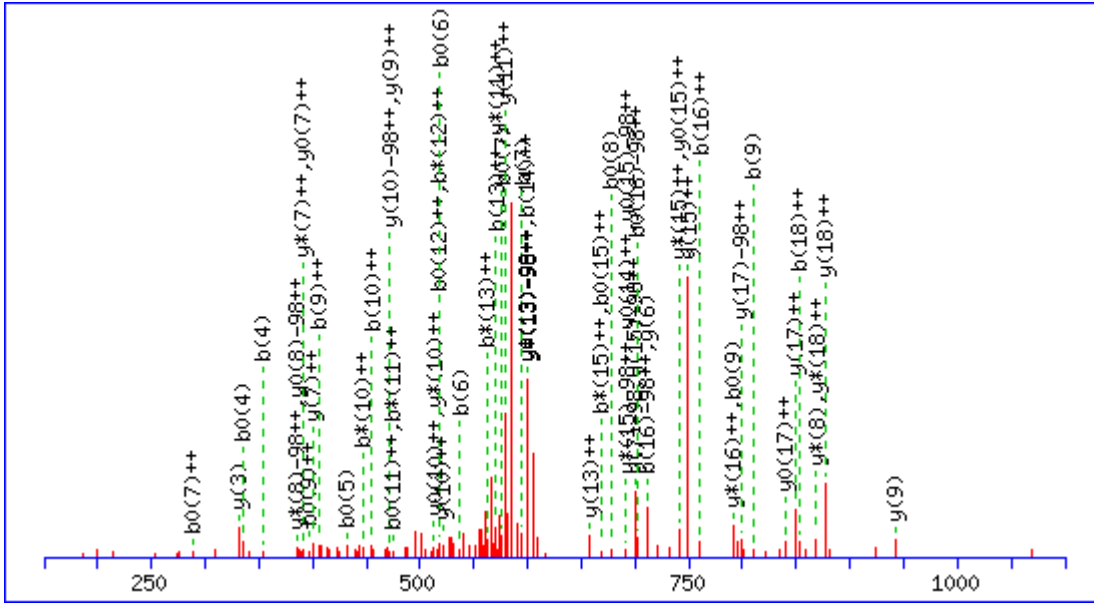

Monoisotopic mass of neutral peptide Mr(calc): 1848.8367

Fixed modifications: Carbamidomethyl (C) (apply to specified residues or termini only)

Variable modifications:

S16 : Phospho (ST), with neutral losses 0.0000(shown in table), 97.9769

Ions Score: 31 Expect: 0.14 (help)

| #  | b         | b <sup>++</sup> | b <sup>*</sup> | b <sup>+++</sup> | b <sup>0</sup> | b <sup>0++</sup> | Seq. | y         | y <sup>++</sup> | y <sup>*</sup> | y <sup>+++</sup> | y <sub>0</sub> | y <sup>0++</sup> | #  |
|----|-----------|-----------------|----------------|------------------|----------------|------------------|------|-----------|-----------------|----------------|------------------|----------------|------------------|----|
| 1  | 98.0600   | 49.5337         |                |                  |                |                  | P    |           |                 |                |                  |                |                  | 19 |
| 2  | 155.0815  | 78.0444         |                |                  |                |                  | G    | 1752.7912 | 876.8993        | 1735.7647      | 868.3860         | 1734.7807      | 867.8940         | 18 |
| 3  | 252.1343  | 126.5708        |                |                  |                |                  | P    | 1695.7698 | 848.3885        | 1678.7432      | 839.8752         | 1677.7592      | 839.3832         | 17 |
| 4  | 353.1819  | 177.0946        |                |                  | 335.1714       | 168.0893         | T    | 1598.7170 | 799.8621        | 1581.6905      | 791.3489         | 1580.7064      | 790.8569         | 16 |
| 5  | 450.2347  | 225.6210        |                |                  | 432.2241       | 216.6157         | P    | 1497.6693 | 749.3383        | 1480.6428      | 740.8250         | 1479.6588      | 740.3330         | 15 |
| 6  | 537.2667  | 269.1370        |                |                  | 519.2562       | 260.1317         | S    | 1400.6166 | 700.8119        | 1383.5900      | 692.2986         | 1382.6060      | 691.8066         | 14 |
| 7  | 594.2882  | 297.6477        |                |                  | 576.2776       | 288.6425         | G    | 1313.5845 | 657.2959        | 1296.5580      | 648.7826         | 1295.5740      | 648.2906         | 13 |
| 8  | 695.3359  | 348.1716        |                |                  | 677.3253       | 339.1663         | T    | 1256.5631 | 628.7852        | 1239.5365      | 620.2719         | 1238.5525      | 619.7799         | 12 |
| 9  | 809.3788  | 405.1930        | 792.3523       | 396.6798         | 791.3682       | 396.1878         | N    | 1155.5154 | 578.2613        | 1138.4888      | 569.7481         | 1137.5048      | 569.2561         | 11 |
| 10 | 908.4472  | 454.7272        | 891.4207       | 446.2140         | 890.4367       | 445.7220         | V    | 1041.4725 | 521.2399        | 1024.4459      | 512.7266         | 1023.4619      | 512.2346         | 10 |
| 11 | 965.4687  | 483.2380        | 948.4421       | 474.7247         | 947.4581       | 474.2327         | G    | 942.4041  | 471.7057        | 925.3775       | 463.1924         | 924.3935       | 462.7004         | 9  |
| 12 | 1052.5007 | 526.7540        | 1035.4742      | 518.2407         | 1034.4902      | 517.7487         | S    | 885.3826  | 443.1949        | 868.3560       | 434.6817         | 867.3720       | 434.1896         | 8  |
| 13 | 1139.5327 | 570.2700        | 1122.5062      | 561.7567         | 1121.5222      | 561.2647         | S    | 798.3506  | 399.6789        | 781.3240       | 391.1656         | 780.3400       | 390.6736         | 7  |
| 14 | 1196.5542 | 598.7807        | 1179.5277      | 590.2675         | 1178.5436      | 589.7755         | G    | 711.3185  | 356.1629        | 694.2920       | 347.6496         | 693.3080       | 347.1576         | 6  |
| 15 | 1352.6553 | 676.8313        | 1335.6288      | 668.3180         | 1334.6448      | 667.8260         | R    | 654.2971  | 327.6522        | 637.2705       | 319.1389         | 636.2865       | 318.6469         | 5  |
| 16 | 1519.6537 | 760.3305        | 1502.6271      | 751.8172         | 1501.6431      | 751.3252         | S    | 498.1960  | 249.6016        | 481.1694       | 241.0883         | 480.1854       | 240.5963         | 4  |
| 17 | 1616.7064 | 808.8569        | 1599.6799      | 800.3436         | 1598.6959      | 799.8516         | P    | 331.1976  | 166.1024        | 314.1710       | 157.5892         | 313.1870       | 157.0972         | 3  |
| 18 | 1703.7385 | 852.3729        | 1686.7119      | 843.8596         | 1685.7279      | 843.3676         | S    | 234.1448  | 117.5761        | 217.1183       | 109.0628         | 216.1343       | 108.5708         | 2  |
| 19 |           |                 |                |                  |                |                  | K    | 147.1128  | 74.0600         | 130.0863       | 65.5468          |                |                  | 1  |

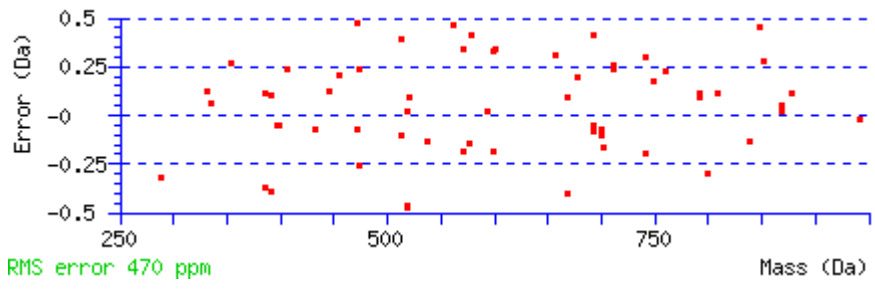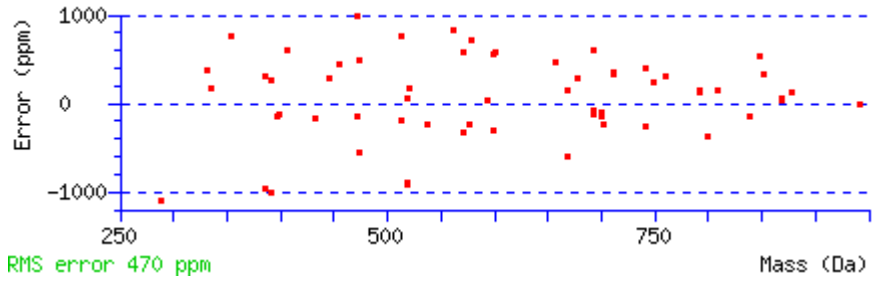

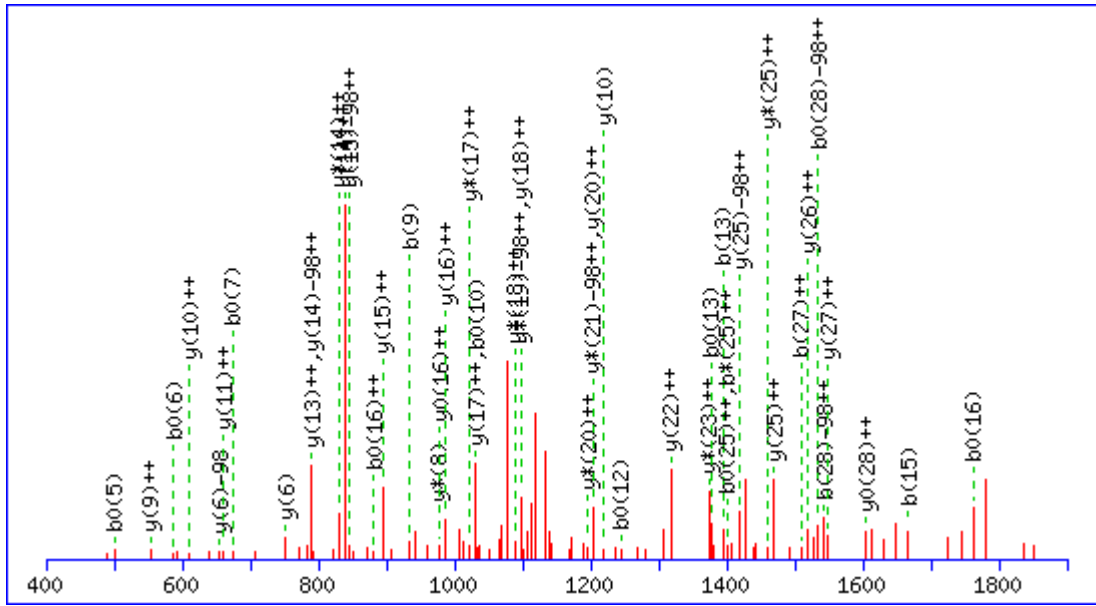

Monoisotopic mass of neutral peptide Mr(calc): 3454.5534

Fixed modifications: Carbamidomethyl (C) (apply to specified residues or termini only)

Variable modifications:

S28 : Phospho (ST), with neutral losses 0.0000(shown in table), 97.9769

Ions Score: 49 Expect: 0.0031 (help)

| #  | b         | b <sup>++</sup> | b <sup>*</sup> | b <sup>+++</sup> | b <sup>0</sup> | b <sup>0++</sup> | Seq. | y         | y <sup>++</sup> | y <sup>*</sup> | y <sup>+++</sup> | y <sup>0</sup> | y <sup>0++</sup> | #  |
|----|-----------|-----------------|----------------|------------------|----------------|------------------|------|-----------|-----------------|----------------|------------------|----------------|------------------|----|
| 1  | 100.0757  | 50.5415         |                |                  |                |                  | V    |           |                 |                |                  |                |                  | 30 |
| 2  | 229.1183  | 115.0628        |                |                  | 211.1077       | 106.0575         | E    | 3356.4923 | 1678.7498       | 3339.4657      | 1670.2365        | 3338.4817      | 1669.7445        | 29 |
| 3  | 360.1588  | 180.5830        |                |                  | 342.1482       | 171.5777         | M    | 3227.4497 | 1614.2285       | 3210.4232      | 1605.7152        | 3209.4391      | 1605.2232        | 28 |
| 4  | 417.1802  | 209.0938        |                |                  | 399.1697       | 200.0885         | G    | 3096.4092 | 1548.7082       | 3079.3827      | 1540.1950        | 3078.3987      | 1539.7030        | 27 |
| 5  | 518.2279  | 259.6176        |                |                  | 500.2173       | 250.6123         | T    | 3039.3878 | 1520.1975       | 3022.3612      | 1511.6842        | 3021.3772      | 1511.1922        | 26 |
| 6  | 605.2599  | 303.1336        |                |                  | 587.2494       | 294.1283         | S    | 2938.3401 | 1469.6737       | 2921.3135      | 1461.1604        | 2920.3295      | 1460.6684        | 25 |
| 7  | 692.2920  | 346.6496        |                |                  | 674.2814       | 337.6443         | S    | 2851.3080 | 1426.1577       | 2834.2815      | 1417.6444        | 2833.2975      | 1417.1524        | 24 |
| 8  | 820.3505  | 410.6789        | 803.3240       | 402.1656         | 802.3400       | 401.6736         | Q    | 2764.2760 | 1382.6416       | 2747.2495      | 1374.1284        | 2746.2655      | 1373.6364        | 23 |
| 9  | 934.3935  | 467.7004        | 917.3669       | 459.1871         | 916.3829       | 458.6951         | N    | 2636.2174 | 1318.6124       | 2619.1909      | 1310.0991        | 2618.2069      | 1309.6071        | 22 |
| 10 | 1049.4204 | 525.2138        | 1032.3939      | 516.7006         | 1031.4099      | 516.2086         | D    | 2522.1745 | 1261.5909       | 2505.1480      | 1253.0776        | 2504.1640      | 1252.5856        | 21 |
| 11 | 1148.4888 | 574.7481        | 1131.4623      | 566.2348         | 1130.4783      | 565.7428         | V    | 2407.1476 | 1204.0774       | 2390.1210      | 1195.5641        | 2389.1370      | 1195.0721        | 20 |
| 12 | 1263.5158 | 632.2615        | 1246.4892      | 623.7482         | 1245.5052      | 623.2562         | D    | 2308.0792 | 1154.5432       | 2291.0526      | 1146.0299        | 2290.0686      | 1145.5379        | 19 |
| 13 | 1394.5563 | 697.7818        | 1377.5297      | 689.2685         | 1376.5457      | 688.7765         | M    | 2193.0522 | 1097.0297       | 2176.0257      | 1088.5165        | 2175.0417      | 1088.0245        | 18 |
| 14 | 1481.5883 | 741.2978        | 1464.5617      | 732.7845         | 1463.5777      | 732.2925         | S    | 2062.0117 | 1031.5095       | 2044.9852      | 1022.9962        | 2044.0012      | 1022.5042        | 17 |
| 15 | 1667.6676 | 834.3374        | 1650.6410      | 825.8242         | 1649.6570      | 825.3322         | W    | 1974.9797 | 987.9935        | 1957.9532      | 979.4802         | 1956.9691      | 978.9882         | 16 |
| 16 | 1780.7517 | 890.8795        | 1763.7251      | 882.3662         | 1762.7411      | 881.8742         | I    | 1788.9004 | 894.9538        | 1771.8738      | 886.4406         | 1770.8898      | 885.9486         | 15 |
| 17 | 1877.8044 | 939.4059        | 1860.7779      | 930.8926         | 1859.7939      | 930.4006         | P    | 1675.8163 | 838.4118        | 1658.7898      | 829.8985         | 1657.8058      | 829.4065         | 14 |
| 18 | 2005.8630 | 1003.4351       | 1988.8365      | 994.9219         | 1987.8524      | 994.4299         | Q    | 1578.7636 | 789.8854        | 1561.7370      | 781.3721         | 1560.7530      | 780.8801         | 13 |
| 19 | 2134.9056 | 1067.9564       | 2117.8790      | 1059.4432        | 2116.8950      | 1058.9512        | E    | 1450.7050 | 725.8561        | 1433.6784      | 717.3429         | 1432.6944      | 716.8508         | 12 |
| 20 | 2235.9533 | 1118.4803       | 2218.9267      | 1109.9670        | 2217.9427      | 1109.4750        | T    | 1321.6624 | 661.3348        | 1304.6358      | 652.8216         | 1303.6518      | 652.3296         | 11 |
| 21 | 2349.0373 | 1175.0223       | 2332.0108      | 1166.5090        | 2331.0268      | 1166.0170        | L    | 1220.6147 | 610.8110        | 1203.5882      | 602.2977         | 1202.6041      | 601.8057         | 10 |
| 22 | 2463.0803 | 1232.0438       | 2446.0537      | 1223.5305        | 2445.0697      | 1223.0385        | N    | 1107.5306 | 554.2690        | 1090.5041      | 545.7557         | 1089.5201      | 545.2637         | 9  |
| 23 | 2591.1388 | 1296.0731       | 2574.1123      | 1287.5598        | 2573.1283      | 1287.0678        | Q    | 993.4877  | 497.2475        | 976.4612       | 488.7342         | 975.4772       | 488.2422         | 8  |
| 24 | 2704.2229 | 1352.6151       | 2687.1964      | 1344.1018        | 2686.2123      | 1343.6098        | I    | 865.4291  | 433.2182        | 848.4026       | 424.7049         | 847.4186       | 424.2129         | 7  |
| 25 | 2818.2658 | 1409.6366       | 2801.2393      | 1401.1233        | 2800.2553      | 1400.6313        | N    | 752.3451  | 376.6762        | 735.3185       | 368.1629         | 734.3345       | 367.6709         | 6  |
| 26 | 2946.3608 | 1473.6840       | 2929.3342      | 1465.1708        | 2928.3502      | 1464.6788        | K    | 638.3022  | 319.6547        | 621.2756       | 311.1414         | 620.2916       | 310.6494         | 5  |
| 27 | 3017.3979 | 1509.2026       | 3000.3714      | 1500.6893        | 2999.3873      | 1500.1973        | A    | 510.2072  | 255.6072        | 493.1806       | 247.0940         | 492.1966       | 246.6020         | 4  |

|    |           |           |           |           |           |           |   |          |          |          |          |          |          |   |
|----|-----------|-----------|-----------|-----------|-----------|-----------|---|----------|----------|----------|----------|----------|----------|---|
| 28 | 3184.3963 | 1592.7018 | 3167.3697 | 1584.1885 | 3166.3857 | 1583.6965 | S | 439.1701 | 220.0887 | 422.1435 | 211.5754 | 421.1595 | 211.0834 | 3 |
| 29 | 3281.4490 | 1641.2282 | 3264.4225 | 1632.7149 | 3263.4385 | 1632.2229 | P | 272.1717 | 136.5895 | 255.1452 | 128.0762 |          |          | 2 |
| 30 |           |           |           |           |           |           | R | 175.1190 | 88.0631  | 158.0924 | 79.5498  |          |          | 1 |

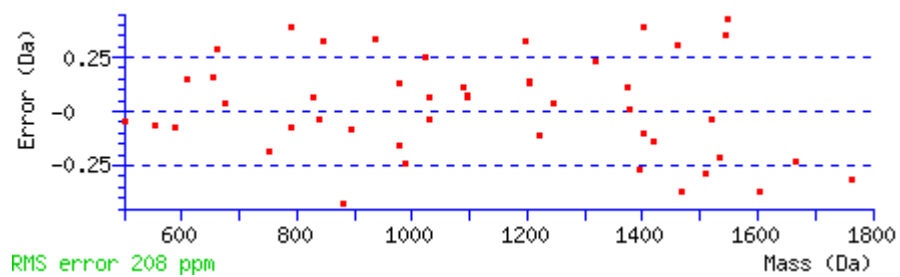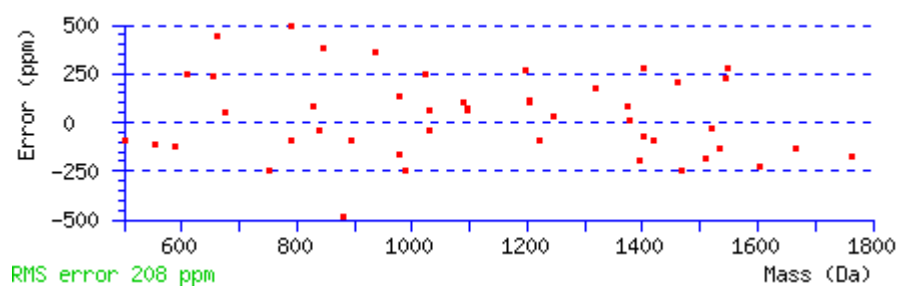

IDENTIFICATION 75

MS/MS Fragmentation of EDALDDSVSSSSVHASPLASSPVRK

Found in IPI00337844

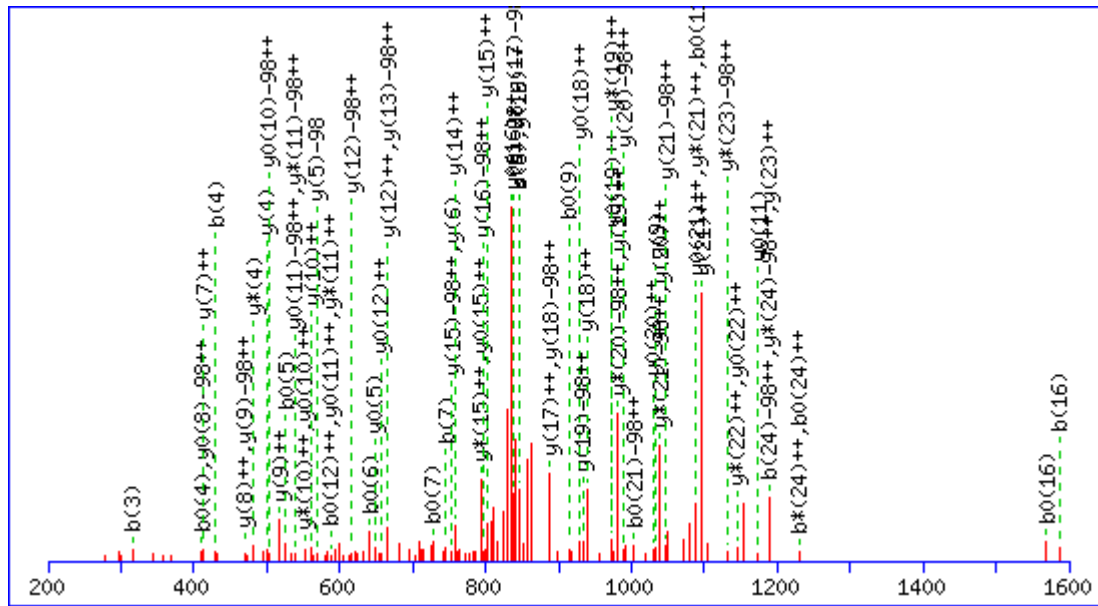

Monoisotopic mass of neutral peptide Mr(calc): 2620.2018

Fixed modifications: Carbamidomethyl (C) (apply to specified residues or termini only)

Variable modifications:

S21 : Phospho (ST), with neutral losses 0.0000 (shown in table), 97.9769

Ions Score: 79 Expect: 2.6e-06 (help)

| #  | b         | b <sup>++</sup> | b <sup>*</sup> | b <sup>+++</sup> | b <sup>0</sup> | b <sup>0++</sup> | Seq. | y         | y <sup>++</sup> | y <sup>*</sup> | y <sup>+++</sup> | y <sup>0</sup> | y <sup>0++</sup> | #  |
|----|-----------|-----------------|----------------|------------------|----------------|------------------|------|-----------|-----------------|----------------|------------------|----------------|------------------|----|
| 1  | 130.0499  | 65.5286         |                |                  | 112.0393       | 56.5233          | E    |           |                 |                |                  |                |                  | 25 |
| 2  | 245.0768  | 123.0420        |                |                  | 227.0662       | 114.0368         | D    | 2492.1665 | 1246.5869       | 2475.1399      | 1238.0736        | 2474.1559      | 1237.5816        | 24 |
| 3  | 316.1139  | 158.5606        |                |                  | 298.1034       | 149.5553         | A    | 2377.1395 | 1189.0734       | 2360.1130      | 1180.5601        | 2359.1289      | 1180.0681        | 23 |
| 4  | 429.1980  | 215.1026        |                |                  | 411.1874       | 206.0974         | L    | 2306.1024 | 1153.5548       | 2289.0758      | 1145.0416        | 2288.0918      | 1144.5496        | 22 |
| 5  | 544.2249  | 272.6161        |                |                  | 526.2144       | 263.6108         | D    | 2193.0183 | 1097.0128       | 2175.9918      | 1088.4995        | 2175.0078      | 1088.0075        | 21 |
| 6  | 659.2519  | 330.1296        |                |                  | 641.2413       | 321.1243         | D    | 2077.9914 | 1039.4993       | 2060.9648      | 1030.9861        | 2059.9808      | 1030.4940        | 20 |
| 7  | 746.2839  | 373.6456        |                |                  | 728.2733       | 364.6403         | S    | 1962.9644 | 981.9859        | 1945.9379      | 973.4726         | 1944.9539      | 972.9806         | 19 |
| 8  | 845.3523  | 423.1798        |                |                  | 827.3418       | 414.1745         | V    | 1875.9324 | 938.4698        | 1858.9059      | 929.9566         | 1857.9219      | 929.4646         | 18 |
| 9  | 932.3843  | 466.6958        |                |                  | 914.3738       | 457.6905         | S    | 1776.8640 | 888.9356        | 1759.8375      | 880.4224         | 1758.8534      | 879.9304         | 17 |
| 10 | 1019.4164 | 510.2118        |                |                  | 1001.4058      | 501.2065         | S    | 1689.8320 | 845.4196        | 1672.8054      | 836.9064         | 1671.8214      | 836.4143         | 16 |
| 11 | 1106.4484 | 553.7278        |                |                  | 1088.4378      | 544.7226         | S    | 1602.7999 | 801.9036        | 1585.7734      | 793.3903         | 1584.7894      | 792.8983         | 15 |
| 12 | 1193.4804 | 597.2439        |                |                  | 1175.4699      | 588.2386         | S    | 1515.7679 | 758.3876        | 1498.7414      | 749.8743         | 1497.7574      | 749.3823         | 14 |
| 13 | 1292.5488 | 646.7781        |                |                  | 1274.5383      | 637.7728         | V    | 1428.7359 | 714.8716        | 1411.7093      | 706.3583         | 1410.7253      | 705.8663         | 13 |
| 14 | 1429.6078 | 715.3075        |                |                  | 1411.5972      | 706.3022         | H    | 1329.6675 | 665.3374        | 1312.6409      | 656.8241         | 1311.6569      | 656.3321         | 12 |
| 15 | 1500.6449 | 750.8261        |                |                  | 1482.6343      | 741.8208         | A    | 1192.6086 | 596.8079        | 1175.5820      | 588.2946         | 1174.5980      | 587.8026         | 11 |
| 16 | 1587.6769 | 794.3421        |                |                  | 1569.6663      | 785.3368         | S    | 1121.5714 | 561.2894        | 1104.5449      | 552.7761         | 1103.5609      | 552.2841         | 10 |
| 17 | 1684.7297 | 842.8685        |                |                  | 1666.7191      | 833.8632         | P    | 1034.5394 | 517.7733        | 1017.5129      | 509.2601         | 1016.5289      | 508.7681         | 9  |
| 18 | 1797.8137 | 899.4105        |                |                  | 1779.8032      | 890.4052         | L    | 937.4867  | 469.2470        | 920.4601       | 460.7337         | 919.4761       | 460.2417         | 8  |
| 19 | 1868.8508 | 934.9291        |                |                  | 1850.8403      | 925.9238         | A    | 824.4026  | 412.7049        | 807.3760       | 404.1917         | 806.3920       | 403.6997         | 7  |
| 20 | 1955.8829 | 978.4451        |                |                  | 1937.8723      | 969.4398         | S    | 753.3655  | 377.1864        | 736.3389       | 368.6731         | 735.3549       | 368.1811         | 6  |
| 21 | 2122.8812 | 1061.9443       |                |                  | 2104.8707      | 1052.9390        | S    | 666.3335  | 333.6704        | 649.3069       | 325.1571         | 648.3229       | 324.6651         | 5  |
| 22 | 2219.9340 | 1110.4706       |                |                  | 2201.9234      | 1101.4654        | P    | 499.3351  | 250.1712        | 482.3085       | 241.6579         |                |                  | 4  |
| 23 | 2319.0024 | 1160.0048       |                |                  | 2300.9918      | 1150.9996        | V    | 402.2823  | 201.6448        | 385.2558       | 193.1315         |                |                  | 3  |
| 24 | 2475.1035 | 1238.0554       | 2458.0770      | 1229.5421        | 2457.0930      | 1229.0501        | R    | 303.2139  | 152.1106        | 286.1874       | 143.5973         |                |                  | 2  |
| 25 |           |                 |                |                  |                |                  | K    | 147.1128  | 74.0600         | 130.0863       | 65.5468          |                |                  | 1  |

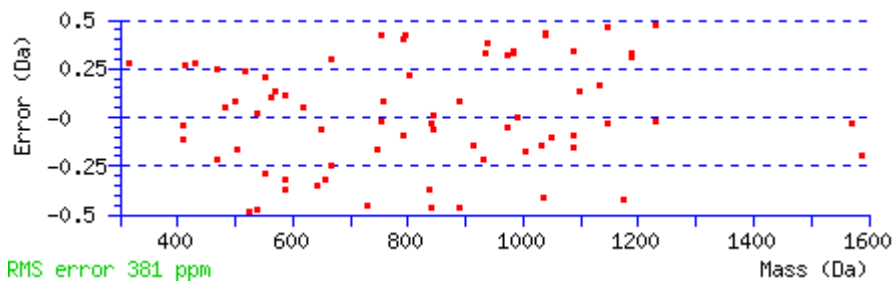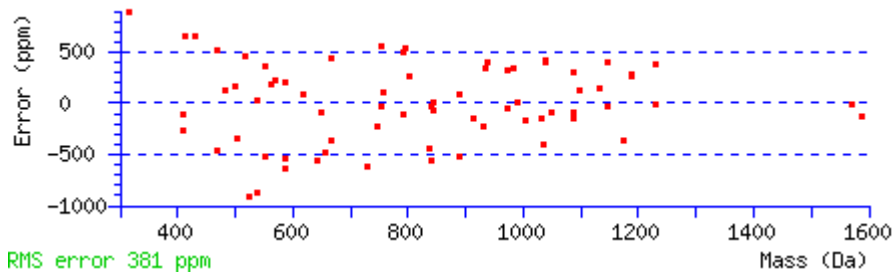

IDENTIFICATION 76

MS/MS Fragmentation of **YLDISSNKIQVIQK**

Found in **IPI00122181**

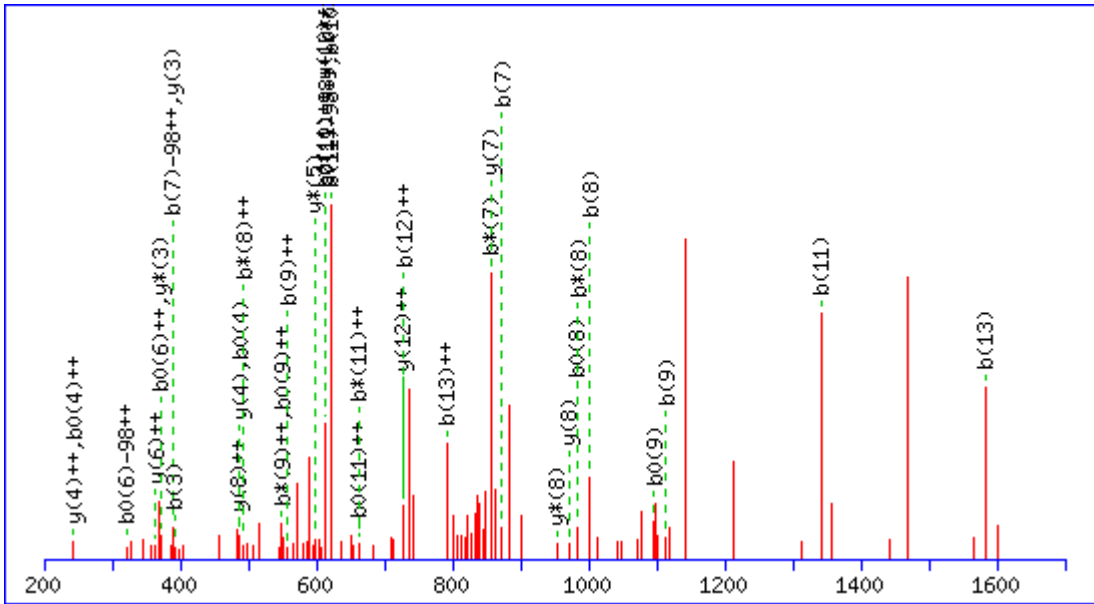

Monoisotopic mass of neutral peptide Mr(calc): 1727.8859

Fixed modifications: Carbamidomethyl (C) (apply to specified residues or termini only)

Variable modifications:

S6 : Phospho (ST), with neutral losses 0.0000(shown in table), 97.9769

Ions Score: 22 Expect: 0.64 (help)

| #  | b         | b <sup>++</sup> | b <sup>*</sup> | b <sup>+++</sup> | b <sup>0</sup> | b <sup>0++</sup> | Seq. | y         | y <sup>++</sup> | y <sup>*</sup> | y <sup>+++</sup> | y <sup>0</sup> | y <sup>0++</sup> | #  |
|----|-----------|-----------------|----------------|------------------|----------------|------------------|------|-----------|-----------------|----------------|------------------|----------------|------------------|----|
| 1  | 164.0706  | 82.5389         |                |                  |                |                  | Y    |           |                 |                |                  |                |                  | 14 |
| 2  | 277.1547  | 139.0810        |                |                  |                |                  | L    | 1565.8298 | 783.4186        | 1548.8033      | 774.9053         | 1547.8193      | 774.4133         | 13 |
| 3  | 392.1816  | 196.5944        |                |                  | 374.1710       | 187.5892         | D    | 1452.7458 | 726.8765        | 1435.7192      | 718.3633         | 1434.7352      | 717.8712         | 12 |
| 4  | 505.2657  | 253.1365        |                |                  | 487.2551       | 244.1312         | I    | 1337.7188 | 669.3631        | 1320.6923      | 660.8498         | 1319.7083      | 660.3578         | 11 |
| 5  | 592.2977  | 296.6525        |                |                  | 574.2871       | 287.6472         | S    | 1224.6348 | 612.8210        | 1207.6082      | 604.3078         | 1206.6242      | 603.8157         | 10 |
| 6  | 759.2961  | 380.1517        |                |                  | 741.2855       | 371.1464         | S    | 1137.6028 | 569.3050        | 1120.5762      | 560.7917         | 1119.5922      | 560.2997         | 9  |
| 7  | 873.3390  | 437.1731        | 856.3124       | 428.6599         | 855.3284       | 428.1679         | N    | 970.6044  | 485.8058        | 953.5778       | 477.2926         |                |                  | 8  |
| 8  | 1001.4340 | 501.2206        | 984.4074       | 492.7073         | 983.4234       | 492.2153         | K    | 856.5615  | 428.7844        | 839.5349       | 420.2711         |                |                  | 7  |
| 9  | 1114.5180 | 557.7626        | 1097.4915      | 549.2494         | 1096.5075      | 548.7574         | I    | 728.4665  | 364.7369        | 711.4400       | 356.2236         |                |                  | 6  |
| 10 | 1242.5766 | 621.7919        | 1225.5500      | 613.2787         | 1224.5660      | 612.7867         | Q    | 615.3824  | 308.1949        | 598.3559       | 299.6816         |                |                  | 5  |
| 11 | 1341.6450 | 671.3261        | 1324.6185      | 662.8129         | 1323.6344      | 662.3209         | V    | 487.3239  | 244.1656        | 470.2973       | 235.6523         |                |                  | 4  |
| 12 | 1454.7291 | 727.8682        | 1437.7025      | 719.3549         | 1436.7185      | 718.8629         | I    | 388.2554  | 194.6314        | 371.2289       | 186.1181         |                |                  | 3  |
| 13 | 1582.7877 | 791.8975        | 1565.7611      | 783.3842         | 1564.7771      | 782.8922         | Q    | 275.1714  | 138.0893        | 258.1448       | 129.5761         |                |                  | 2  |
| 14 |           |                 |                |                  |                |                  | K    | 147.1128  | 74.0600         | 130.0863       | 65.5468          |                |                  | 1  |



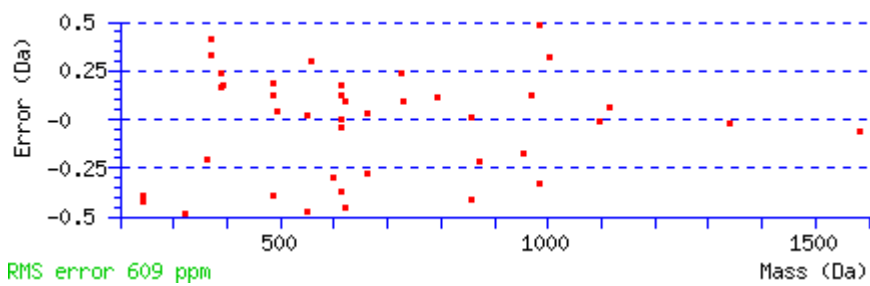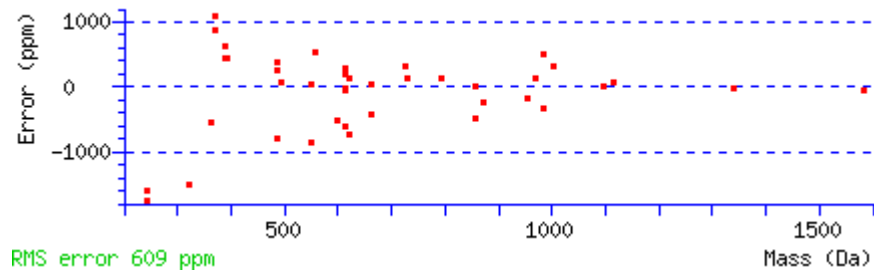



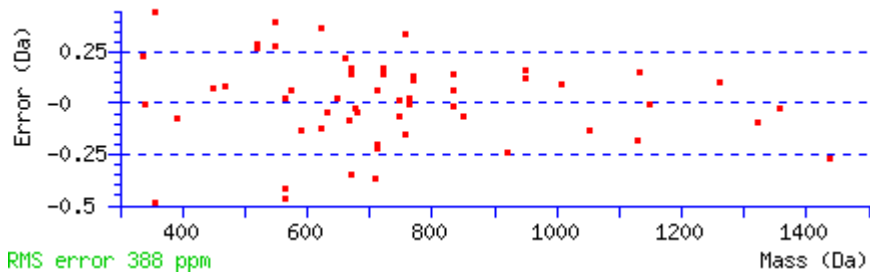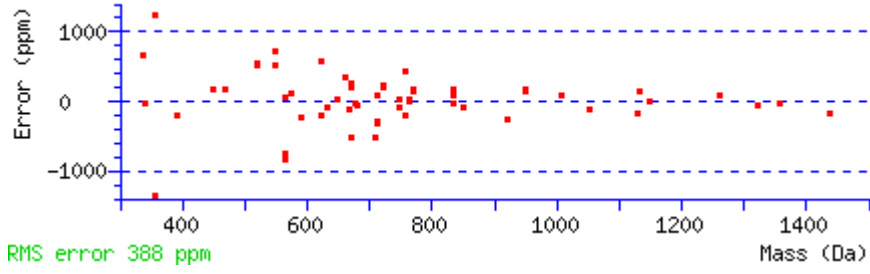

IDENTIFICATION 78

MS/MS Fragmentation of **IHP EASH PAAIQD SCEE R**

Found in **IPI00113389**

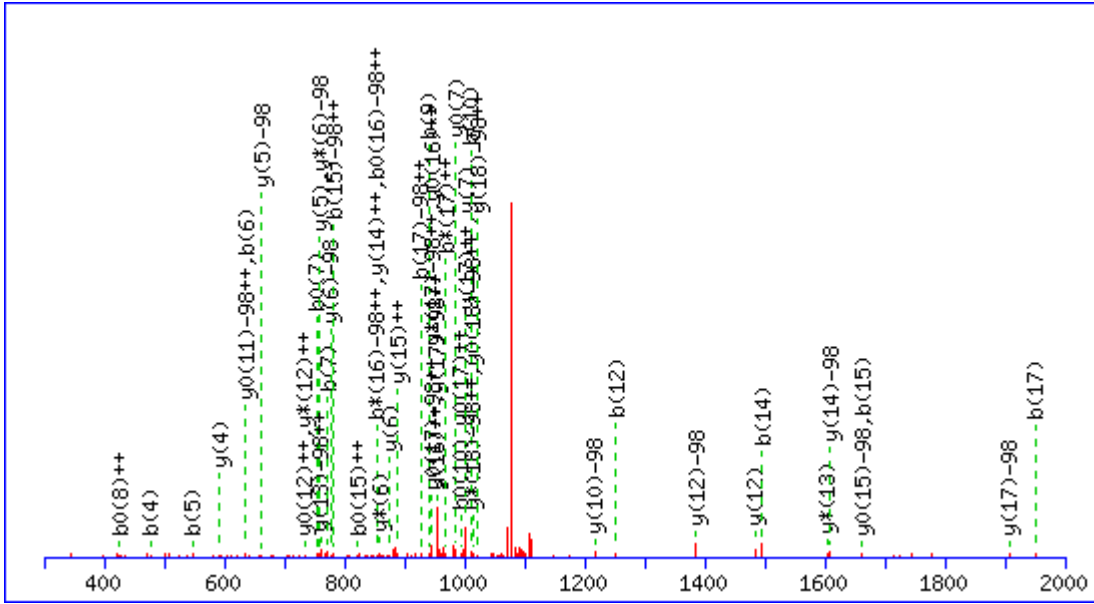

Monoisotopic mass of neutral peptide Mr(calc): 2253.9474

Fixed modifications: Carbamidomethyl (C) (apply to specified residues or termini only)

Variable modifications:

S15 : Phospho (ST), with neutral losses 97.9769 (shown in table), 0.0000

Ions Score: 31 Expect: 0.19 (help)

| #  | b         | b <sup>++</sup> | b <sup>*</sup> | b <sup>+++</sup> | b <sub>0</sub> | b <sup>0++</sup> | Seq. | y         | y <sup>++</sup> | y <sup>*</sup> | y <sup>+++</sup> | y <sup>0</sup> | y <sup>0++</sup> | #  |
|----|-----------|-----------------|----------------|------------------|----------------|------------------|------|-----------|-----------------|----------------|------------------|----------------|------------------|----|
| 1  | 114.0913  | 57.5493         |                |                  |                |                  | I    |           |                 |                |                  |                |                  | 19 |
| 2  | 251.1503  | 126.0788        |                |                  |                |                  | H    | 2043.8937 | 1022.4505       | 2026.8672      | 1013.9372        | 2025.8832      | 1013.4452        | 18 |
| 3  | 348.2030  | 174.6051        |                |                  |                |                  | P    | 1906.8348 | 953.9210        | 1889.8083      | 945.4078         | 1888.8243      | 944.9158         | 17 |
| 4  | 477.2456  | 239.1264        |                |                  | 459.2350       | 230.1212         | E    | 1809.7821 | 905.3947        | 1792.7555      | 896.8814         | 1791.7715      | 896.3894         | 16 |
| 5  | 548.2827  | 274.6450        |                |                  | 530.2722       | 265.6397         | A    | 1680.7395 | 840.8734        | 1663.7129      | 832.3601         | 1662.7289      | 831.8681         | 15 |
| 6  | 635.3148  | 318.1610        |                |                  | 617.3042       | 309.1557         | S    | 1609.7023 | 805.3548        | 1592.6758      | 796.8415         | 1591.6918      | 796.3495         | 14 |
| 7  | 772.3737  | 386.6905        |                |                  | 754.3631       | 377.6852         | H    | 1522.6703 | 761.8388        | 1505.6438      | 753.3255         | 1504.6598      | 752.8335         | 13 |
| 8  | 869.4264  | 435.2169        |                |                  | 851.4159       | 426.2116         | P    | 1385.6114 | 693.3093        | 1368.5849      | 684.7961         | 1367.6008      | 684.3041         | 12 |
| 9  | 940.4635  | 470.7354        |                |                  | 922.4530       | 461.7301         | A    | 1288.5586 | 644.7830        | 1271.5321      | 636.2697         | 1270.5481      | 635.7777         | 11 |
| 10 | 1011.5007 | 506.2540        |                |                  | 993.4901       | 497.2487         | A    | 1217.5215 | 609.2644        | 1200.4950      | 600.7511         | 1199.5110      | 600.2591         | 10 |
| 11 | 1124.5847 | 562.7960        |                |                  | 1106.5742      | 553.7907         | I    | 1146.4844 | 573.7458        | 1129.4579      | 565.2326         | 1128.4738      | 564.7406         | 9  |
| 12 | 1252.6433 | 626.8253        | 1235.6167      | 618.3120         | 1234.6327      | 617.8200         | Q    | 1033.4003 | 517.2038        | 1016.3738      | 508.6905         | 1015.3898      | 508.1985         | 8  |
| 13 | 1380.7019 | 690.8546        | 1363.6753      | 682.3413         | 1362.6913      | 681.8493         | Q    | 905.3418  | 453.1745        | 888.3152       | 444.6612         | 887.3312       | 444.1692         | 7  |
| 14 | 1495.7288 | 748.3680        | 1478.7023      | 739.8548         | 1477.7183      | 739.3628         | D    | 777.2832  | 389.1452        | 760.2566       | 380.6320         | 759.2726       | 380.1400         | 6  |
| 15 | 1564.7503 | 782.8788        | 1547.7237      | 774.3655         | 1546.7397      | 773.8735         | S    | 662.2563  | 331.6318        | 645.2297       | 323.1185         | 644.2457       | 322.6265         | 5  |
| 16 | 1724.7809 | 862.8941        | 1707.7544      | 854.3808         | 1706.7704      | 853.8888         | C    | 593.2348  | 297.1210        | 576.2082       | 288.6078         | 575.2242       | 288.1157         | 4  |
| 17 | 1853.8235 | 927.4154        | 1836.7970      | 918.9021         | 1835.8130      | 918.4101         | E    | 433.2041  | 217.1057        | 416.1776       | 208.5924         | 415.1936       | 208.1004         | 3  |
| 18 | 1982.8661 | 991.9367        | 1965.8396      | 983.4234         | 1964.8556      | 982.9314         | E    | 304.1615  | 152.5844        | 287.1350       | 144.0711         | 286.1510       | 143.5791         | 2  |
| 19 |           |                 |                |                  |                |                  | R    | 175.1190  | 88.0631         | 158.0924       | 79.5498          |                |                  | 1  |

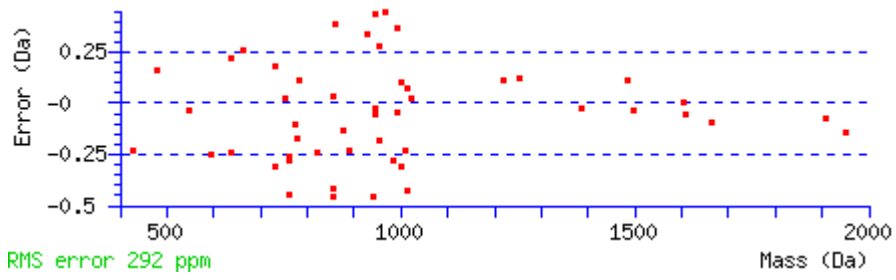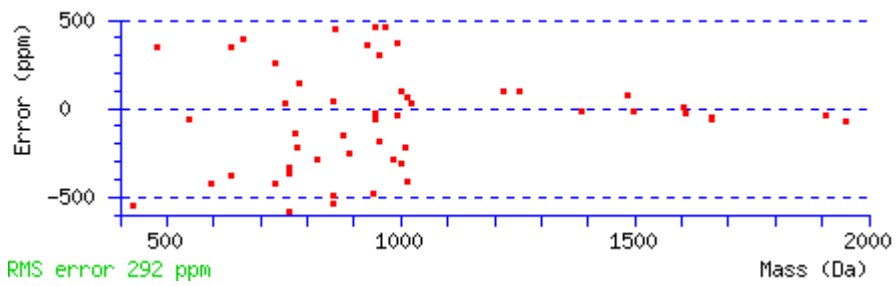

IDENTIFICATION 79

MS/MS Fragmentation of SGAQASSTPLSPTR

Found in IPI00400300

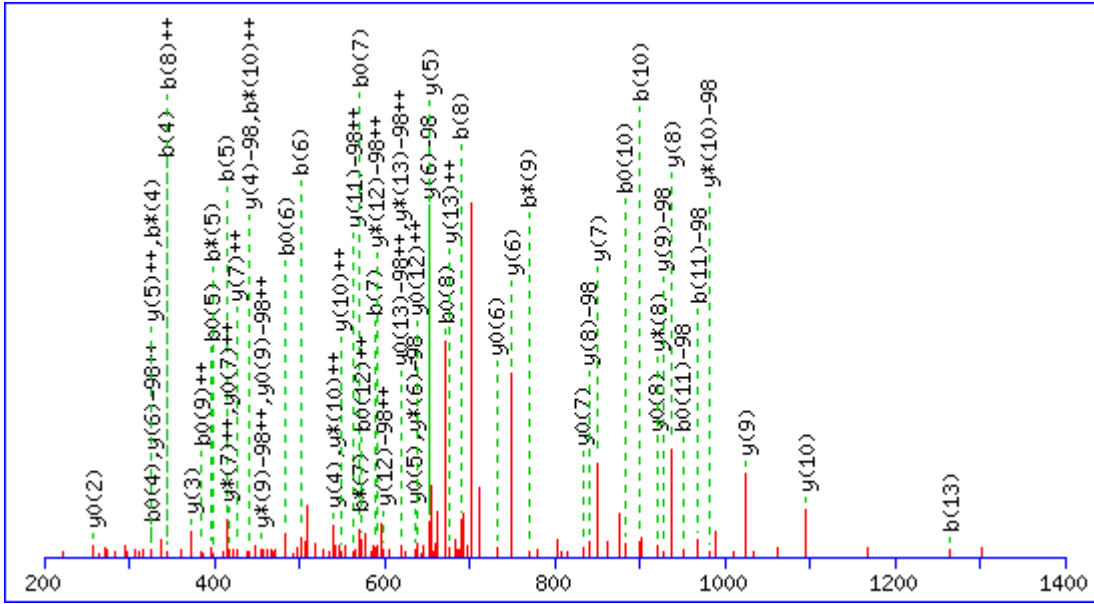

Monoisotopic mass of neutral peptide Mr(calc): 1438.6453

Fixed modifications: Carbamidomethyl (C) (apply to specified residues or termini only)

Variable modifications:

S11 : Phospho (ST), with neutral losses 0.0000(shown in table), 97.9769

Ions Score: 41 Expect: 0.012 (help)

| #  | b         | b <sup>++</sup> | b <sup>*</sup> | b <sup>+++</sup> | b <sup>0</sup> | b <sup>0++</sup> | Seq. | y         | y <sup>++</sup> | y <sup>*</sup> | y <sup>+++</sup> | y <sup>0</sup> | y <sup>0++</sup> | #  |
|----|-----------|-----------------|----------------|------------------|----------------|------------------|------|-----------|-----------------|----------------|------------------|----------------|------------------|----|
| 1  | 88.0393   | 44.5233         |                |                  | 70.0287        | 35.5180          | S    |           |                 |                |                  |                |                  | 14 |
| 2  | 145.0608  | 73.0340         |                |                  | 127.0502       | 64.0287          | G    | 1352.6206 | 676.8139        | 1335.5940      | 668.3007         | 1334.6100      | 667.8086         | 13 |
| 3  | 216.0979  | 108.5526        |                |                  | 198.0873       | 99.5473          | A    | 1295.5991 | 648.3032        | 1278.5726      | 639.7899         | 1277.5886      | 639.2979         | 12 |
| 4  | 344.1565  | 172.5819        | 327.1299       | 164.0686         | 326.1459       | 163.5766         | Q    | 1224.5620 | 612.7846        | 1207.5355      | 604.2714         | 1206.5514      | 603.7794         | 11 |
| 5  | 415.1936  | 208.1004        | 398.1670       | 199.5872         | 397.1830       | 199.0951         | A    | 1096.5034 | 548.7554        | 1079.4769      | 540.2421         | 1078.4929      | 539.7501         | 10 |
| 6  | 502.2256  | 251.6164        | 485.1991       | 243.1032         | 484.2150       | 242.6112         | S    | 1025.4663 | 513.2368        | 1008.4398      | 504.7235         | 1007.4558      | 504.2315         | 9  |
| 7  | 589.2576  | 295.1325        | 572.2311       | 286.6192         | 571.2471       | 286.1272         | S    | 938.4343  | 469.7208        | 921.4077       | 461.2075         | 920.4237       | 460.7155         | 8  |
| 8  | 690.3053  | 345.6563        | 673.2788       | 337.1430         | 672.2947       | 336.6510         | T    | 851.4023  | 426.2048        | 834.3757       | 417.6915         | 833.3917       | 417.1995         | 7  |
| 9  | 787.3581  | 394.1827        | 770.3315       | 385.6694         | 769.3475       | 385.1774         | P    | 750.3546  | 375.6809        | 733.3280       | 367.1677         | 732.3440       | 366.6756         | 6  |
| 10 | 900.4421  | 450.7247        | 883.4156       | 442.2114         | 882.4316       | 441.7194         | L    | 653.3018  | 327.1545        | 636.2753       | 318.6413         | 635.2913       | 318.1493         | 5  |
| 11 | 1067.4405 | 534.2239        | 1050.4139      | 525.7106         | 1049.4299      | 525.2186         | S    | 540.2178  | 270.6125        | 523.1912       | 262.0992         | 522.2072       | 261.6072         | 4  |
| 12 | 1164.4933 | 582.7503        | 1147.4667      | 574.2370         | 1146.4827      | 573.7450         | P    | 373.2194  | 187.1133        | 356.1928       | 178.6001         | 355.2088       | 178.1081         | 3  |
| 13 | 1265.5409 | 633.2741        | 1248.5144      | 624.7608         | 1247.5304      | 624.2688         | T    | 276.1666  | 138.5870        | 259.1401       | 130.0737         | 258.1561       | 129.5817         | 2  |
| 14 |           |                 |                |                  |                |                  | R    | 175.1190  | 88.0631         | 158.0924       | 79.5498          |                |                  | 1  |

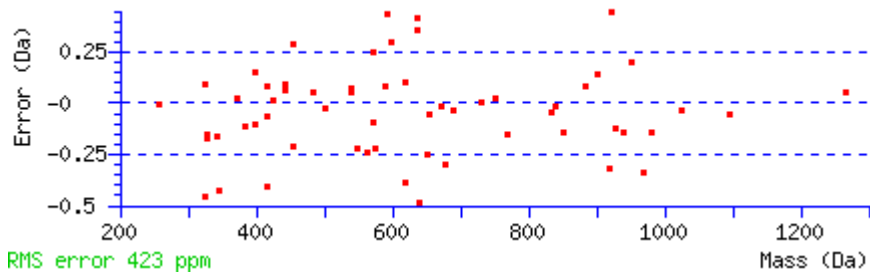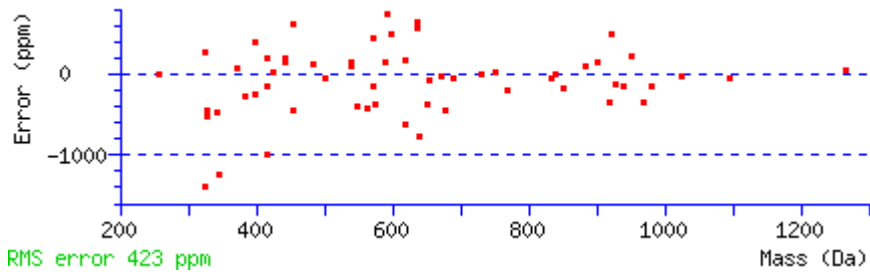

IDENTIFICATION 80

MS/MS Fragmentation of **DYIMSGGLVSSEK**

Found in **IPI00330560**

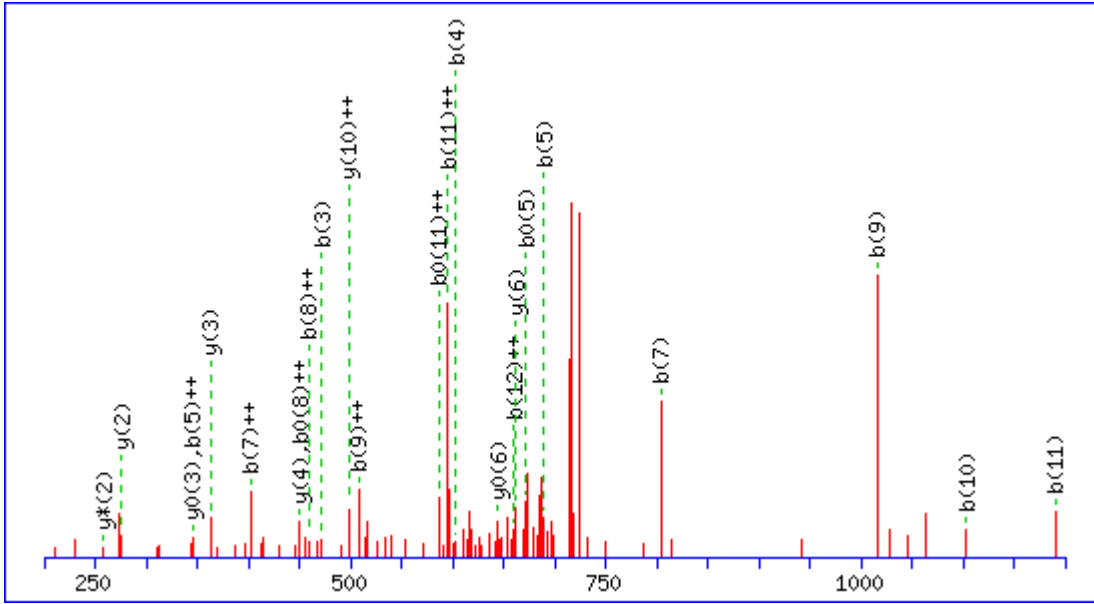

Monoisotopic mass of neutral peptide Mr(calc): 1464.6207

Fixed modifications: Carbamidomethyl (C) (apply to specified residues or termini only)

Variable modifications:

Y2 : Phospho (Y)

Ions Score: 23 Expect: 0.66 (help)

| #  | b         | b <sup>++</sup> | b <sup>0</sup> | b <sup>0++</sup> | Seq. | y         | y <sup>++</sup> | y <sup>*</sup> | y <sup>+++</sup> | y <sup>0</sup> | y <sup>0++</sup> | #  |
|----|-----------|-----------------|----------------|------------------|------|-----------|-----------------|----------------|------------------|----------------|------------------|----|
| 1  | 116.0342  | 58.5207         | 98.0237        | 49.5155          | D    |           |                 |                |                  |                |                  | 13 |
| 2  | 359.0639  | 180.0356        | 341.0533       | 171.0303         | Y    | 1350.6011 | 675.8042        | 1333.5745      | 667.2909         | 1332.5905      | 666.7989         | 12 |
| 3  | 472.1479  | 236.5776        | 454.1374       | 227.5723         | I    | 1107.5714 | 554.2894        | 1090.5449      | 545.7761         | 1089.5609      | 545.2841         | 11 |
| 4  | 603.1884  | 302.0979        | 585.1779       | 293.0926         | M    | 994.4874  | 497.7473        | 977.4608       | 489.2340         | 976.4768       | 488.7420         | 10 |
| 5  | 690.2205  | 345.6139        | 672.2099       | 336.6086         | S    | 863.4469  | 432.2271        | 846.4203       | 423.7138         | 845.4363       | 423.2218         | 9  |
| 6  | 747.2419  | 374.1246        | 729.2314       | 365.1193         | G    | 776.4149  | 388.7111        | 759.3883       | 380.1978         | 758.4043       | 379.7058         | 8  |
| 7  | 804.2634  | 402.6353        | 786.2528       | 393.6300         | G    | 719.3934  | 360.2003        | 702.3668       | 351.6871         | 701.3828       | 351.1951         | 7  |
| 8  | 917.3474  | 459.1774        | 899.3369       | 450.1721         | L    | 662.3719  | 331.6896        | 645.3454       | 323.1763         | 644.3614       | 322.6843         | 6  |
| 9  | 1016.4159 | 508.7116        | 998.4053       | 499.7063         | V    | 549.2879  | 275.1476        | 532.2613       | 266.6343         | 531.2773       | 266.1423         | 5  |
| 10 | 1103.4479 | 552.2276        | 1085.4373      | 543.2223         | S    | 450.2195  | 225.6134        | 433.1929       | 217.1001         | 432.2089       | 216.6081         | 4  |
| 11 | 1190.4799 | 595.7436        | 1172.4694      | 586.7383         | S    | 363.1874  | 182.0974        | 346.1609       | 173.5841         | 345.1769       | 173.0921         | 3  |
| 12 | 1319.5225 | 660.2649        | 1301.5119      | 651.2596         | E    | 276.1554  | 138.5813        | 259.1288       | 130.0681         | 258.1448       | 129.5761         | 2  |
| 13 |           |                 |                |                  | K    | 147.1128  | 74.0600         | 130.0863       | 65.5468          |                |                  | 1  |

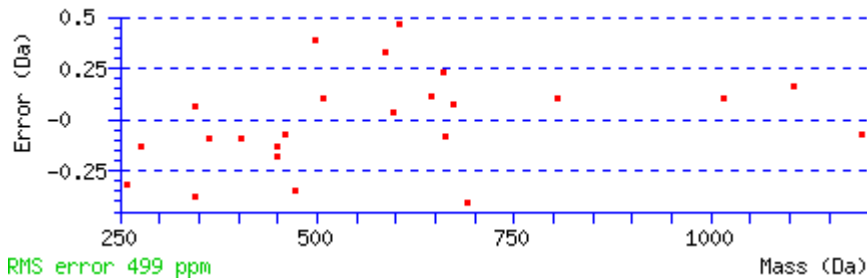



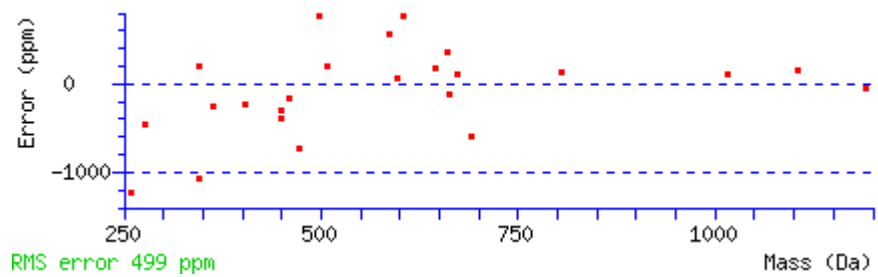

IDENTIFICATION 81

MS/MS Fragmentation of **SSTPLPTVSSAENTR**

Found in **IPI00126338**

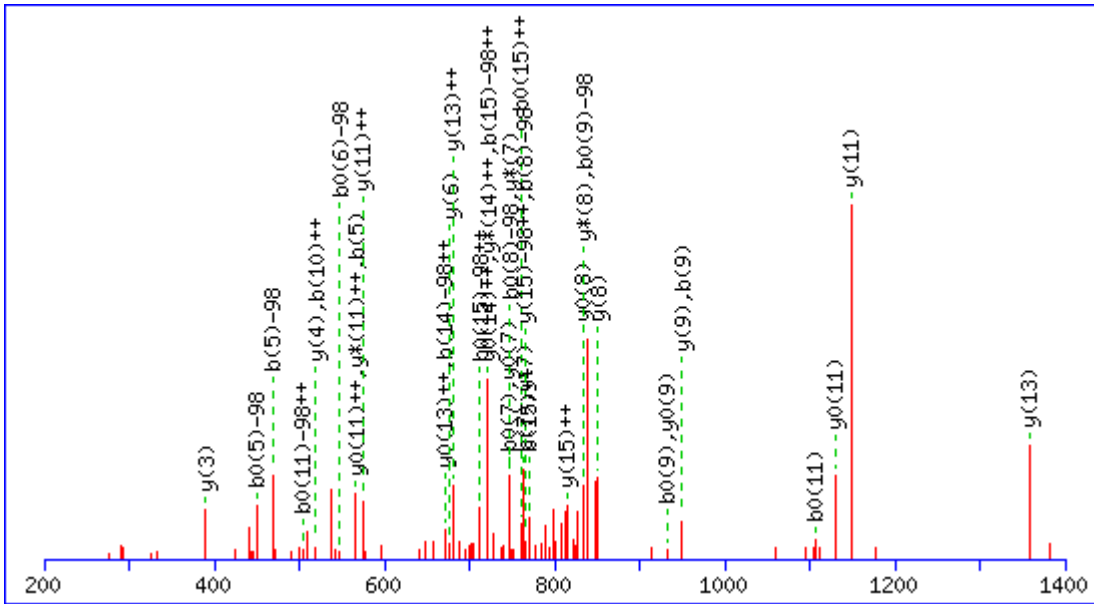

Monoisotopic mass of neutral peptide Mr(calc): 1712.7618

Fixed modifications: Carbamidomethyl (C) (apply to specified residues or termini only)

Variable modifications:

S2 : Phospho (ST), with neutral losses 0.0000(shown in table), 97.9769

Ions Score: 36 Expect: 0.038 (help)

| #  | b         | b <sup>++</sup> | b <sup>*</sup> | b <sup>+++</sup> | b <sup>0</sup> | b <sup>0++</sup> | Seq. | y         | y <sup>++</sup> | y <sup>*</sup> | y <sup>+++</sup> | y <sup>0</sup> | y <sup>0++</sup> | #  |
|----|-----------|-----------------|----------------|------------------|----------------|------------------|------|-----------|-----------------|----------------|------------------|----------------|------------------|----|
| 1  | 88.0393   | 44.5233         |                |                  | 70.0287        | 35.5180          | S    |           |                 |                |                  |                |                  | 16 |
| 2  | 255.0377  | 128.0225        |                |                  | 237.0271       | 119.0172         | S    | 1626.7371 | 813.8722        | 1609.7105      | 805.3589         | 1608.7265      | 804.8669         | 15 |
| 3  | 356.0853  | 178.5463        |                |                  | 338.0748       | 169.5410         | T    | 1459.7387 | 730.3730        | 1442.7122      | 721.8597         | 1441.7281      | 721.3677         | 14 |
| 4  | 453.1381  | 227.0727        |                |                  | 435.1275       | 218.0674         | P    | 1358.6910 | 679.8492        | 1341.6645      | 671.3359         | 1340.6805      | 670.8439         | 13 |
| 5  | 566.2222  | 283.6147        |                |                  | 548.2116       | 274.6094         | L    | 1261.6383 | 631.3228        | 1244.6117      | 622.8095         | 1243.6277      | 622.3175         | 12 |
| 6  | 663.2749  | 332.1411        |                |                  | 645.2644       | 323.1358         | P    | 1148.5542 | 574.7807        | 1131.5277      | 566.2675         | 1130.5436      | 565.7755         | 11 |
| 7  | 764.3226  | 382.6649        |                |                  | 746.3120       | 373.6597         | T    | 1051.5014 | 526.2544        | 1034.4749      | 517.7411         | 1033.4909      | 517.2491         | 10 |
| 8  | 863.3910  | 432.1992        |                |                  | 845.3805       | 423.1939         | V    | 950.4538  | 475.7305        | 933.4272       | 467.2172         | 932.4432       | 466.7252         | 9  |
| 9  | 950.4231  | 475.7152        |                |                  | 932.4125       | 466.7099         | S    | 851.3853  | 426.1963        | 834.3588       | 417.6830         | 833.3748       | 417.1910         | 8  |
| 10 | 1037.4551 | 519.2312        |                |                  | 1019.4445      | 510.2259         | S    | 764.3533  | 382.6803        | 747.3268       | 374.1670         | 746.3428       | 373.6750         | 7  |
| 11 | 1124.4871 | 562.7472        |                |                  | 1106.4765      | 553.7419         | S    | 677.3213  | 339.1643        | 660.2947       | 330.6510         | 659.3107       | 330.1590         | 6  |
| 12 | 1195.5242 | 598.2658        |                |                  | 1177.5137      | 589.2605         | A    | 590.2893  | 295.6483        | 573.2627       | 287.1350         | 572.2787       | 286.6430         | 5  |
| 13 | 1324.5668 | 662.7870        |                |                  | 1306.5563      | 653.7818         | E    | 519.2522  | 260.1297        | 502.2256       | 251.6164         | 501.2416       | 251.1244         | 4  |
| 14 | 1438.6097 | 719.8085        | 1421.5832      | 711.2952         | 1420.5992      | 710.8032         | N    | 390.2096  | 195.6084        | 373.1830       | 187.0951         | 372.1990       | 186.6031         | 3  |
| 15 | 1539.6574 | 770.3324        | 1522.6309      | 761.8191         | 1521.6469      | 761.3271         | T    | 276.1666  | 138.5870        | 259.1401       | 130.0737         | 258.1561       | 129.5817         | 2  |
| 16 |           |                 |                |                  |                |                  | R    | 175.1190  | 88.0631         | 158.0924       | 79.5498          |                |                  | 1  |

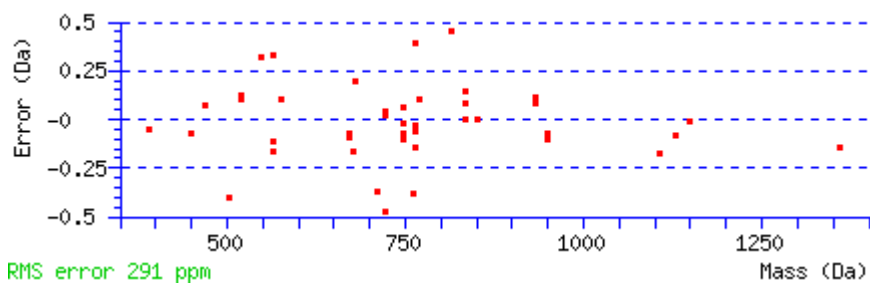

RMS error 291 ppm

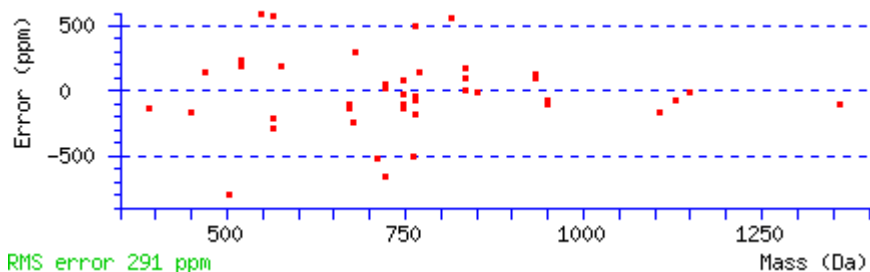

RMS error 291 ppm

IDENTIFICATION 82

MS/MS Fragmentation of **NEKSEEEQSSASVK**

Found in **IPI00130343**

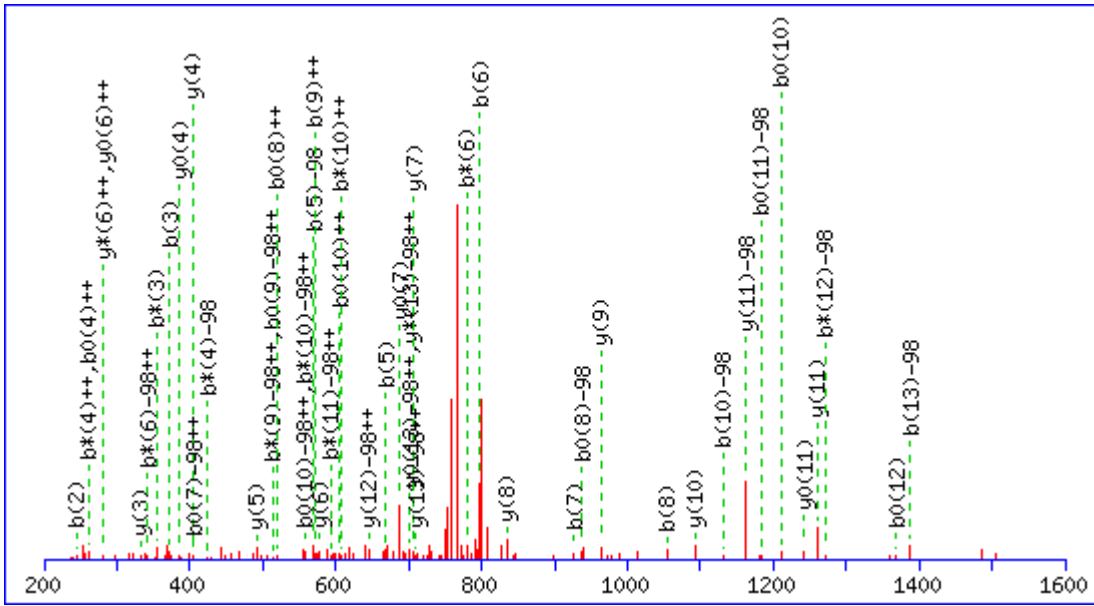

Monoisotopic mass of neutral peptide  $M_r(\text{calc})$ : 1630.6723

Fixed modifications: Carbamidomethyl (C) (apply to specified residues or termini only)

Variable modifications:

S4 : Phospho (ST), with neutral losses 97.9769 (shown in table), 0.0000

Ions Score: 26 Expect: 0.37 (help)

| #  | b         | b <sup>++</sup> | b <sup>*</sup> | b <sup>+++</sup> | b <sup>0</sup> | b <sup>0++</sup> | Seq. | y         | y <sup>++</sup> | y <sup>*</sup> | y <sup>+++</sup> | y <sup>0</sup> | y <sup>0++</sup> | #  |
|----|-----------|-----------------|----------------|------------------|----------------|------------------|------|-----------|-----------------|----------------|------------------|----------------|------------------|----|
| 1  | 115.0502  | 58.0287         | 98.0237        | 49.5155          |                |                  | N    |           |                 |                |                  |                |                  | 14 |
| 2  | 244.0928  | 122.5500        | 227.0662       | 114.0368         | 226.0822       | 113.5448         | E    | 1419.6598 | 710.3335        | 1402.6332      | 701.8203         | 1401.6492      | 701.3283         | 13 |
| 3  | 372.1878  | 186.5975        | 355.1612       | 178.0842         | 354.1772       | 177.5922         | K    | 1290.6172 | 645.8122        | 1273.5907      | 637.2990         | 1272.6066      | 636.8070         | 12 |
| 4  | 441.2092  | 221.1082        | 424.1827       | 212.5950         | 423.1987       | 212.1030         | S    | 1162.5222 | 581.7648        | 1145.4957      | 573.2515         | 1144.5117      | 572.7595         | 11 |
| 5  | 570.2518  | 285.6295        | 553.2253       | 277.1163         | 552.2413       | 276.6243         | E    | 1093.5008 | 547.2540        | 1076.4742      | 538.7408         | 1075.4902      | 538.2487         | 10 |
| 6  | 699.2944  | 350.1508        | 682.2679       | 341.6376         | 681.2838       | 341.1456         | E    | 964.4582  | 482.7327        | 947.4316       | 474.2195         | 946.4476       | 473.7274         | 9  |
| 7  | 828.3370  | 414.6721        | 811.3105       | 406.1589         | 810.3264       | 405.6669         | E    | 835.4156  | 418.2114        | 818.3890       | 409.6982         | 817.4050       | 409.2061         | 8  |
| 8  | 956.3956  | 478.7014        | 939.3690       | 470.1882         | 938.3850       | 469.6961         | Q    | 706.3730  | 353.6901        | 689.3464       | 345.1769         | 688.3624       | 344.6849         | 7  |
| 9  | 1043.4276 | 522.2174        | 1026.4011      | 513.7042         | 1025.4170      | 513.2122         | S    | 578.3144  | 289.6608        | 561.2879       | 281.1476         | 560.3039       | 280.6556         | 6  |
| 10 | 1130.4596 | 565.7335        | 1113.4331      | 557.2202         | 1112.4491      | 556.7282         | S    | 491.2824  | 246.1448        | 474.2558       | 237.6316         | 473.2718       | 237.1395         | 5  |
| 11 | 1201.4967 | 601.2520        | 1184.4702      | 592.7387         | 1183.4862      | 592.2467         | A    | 404.2504  | 202.6288        | 387.2238       | 194.1155         | 386.2398       | 193.6235         | 4  |
| 12 | 1288.5288 | 644.7680        | 1271.5022      | 636.2548         | 1270.5182      | 635.7627         | S    | 333.2132  | 167.1103        | 316.1867       | 158.5970         | 315.2027       | 158.1050         | 3  |
| 13 | 1387.5972 | 694.3022        | 1370.5706      | 685.7890         | 1369.5866      | 685.2970         | V    | 246.1812  | 123.5942        | 229.1547       | 115.0810         |                |                  | 2  |
| 14 |           |                 |                |                  |                |                  | K    | 147.1128  | 74.0600         | 130.0863       | 65.5468          |                |                  | 1  |

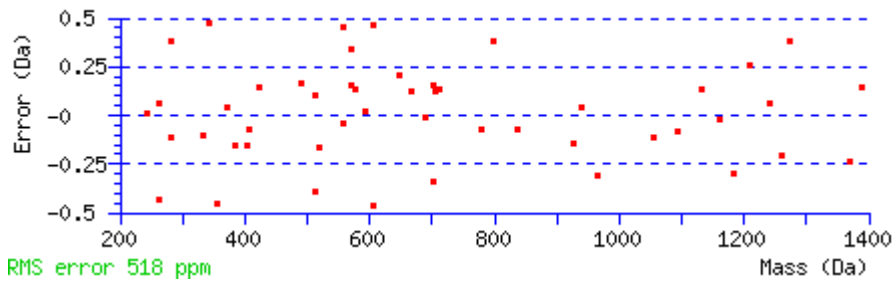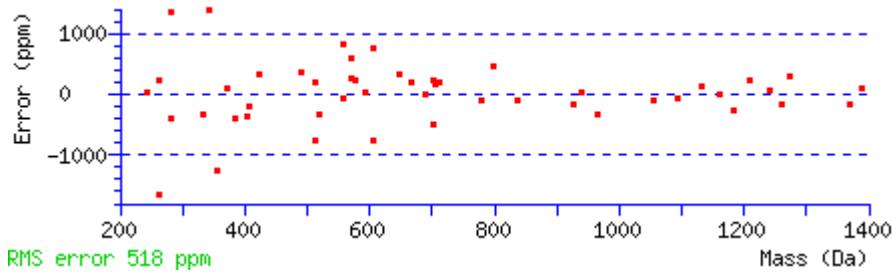

IDENTIFICATION 83

MS/MS Fragmentation of EIITEEPSEEEADMPKPK

Found in IPI00120691

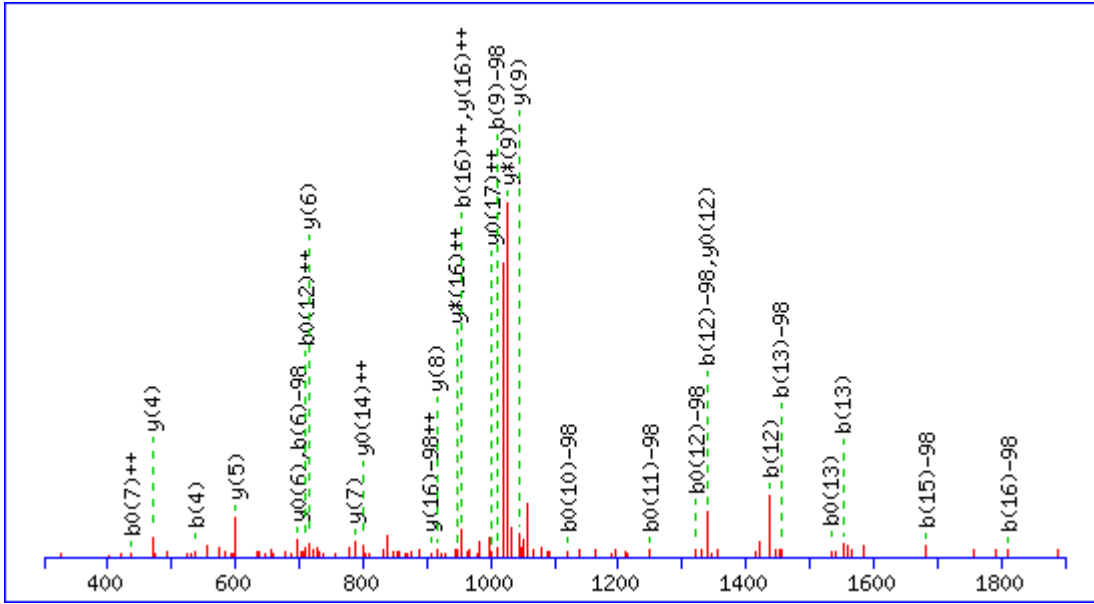

Monoisotopic mass of neutral peptide Mr(calc): 2150.9330

Fixed modifications: Carbamidomethyl (C) (apply to specified residues or termini only)

Variable modifications:

T4 : Phospho (ST), with neutral losses 97.9769 (shown in table), 0.0000

Ions Score: 29 Expect: 0.23 (help)

| #  | b         | b <sup>++</sup> | b <sup>*</sup> | b <sup>+++</sup> | b <sup>0</sup> | b <sup>0++</sup> | Seq. | y         | y <sup>++</sup> | y <sup>*</sup> | y <sup>+++</sup> | y <sup>0</sup> | y <sup>0++</sup> | #  |
|----|-----------|-----------------|----------------|------------------|----------------|------------------|------|-----------|-----------------|----------------|------------------|----------------|------------------|----|
| 1  | 130.0499  | 65.5286         |                |                  | 112.0393       | 56.5233          | E    |           |                 |                |                  |                |                  | 18 |
| 2  | 243.1339  | 122.0706        |                |                  | 225.1234       | 113.0653         | I    | 1924.9208 | 962.9641        | 1907.8943      | 954.4508         | 1906.9103      | 953.9588         | 17 |
| 3  | 356.2180  | 178.6126        |                |                  | 338.2074       | 169.6074         | I    | 1811.8368 | 906.4220        | 1794.8102      | 897.9087         | 1793.8262      | 897.4167         | 16 |
| 4  | 439.2551  | 220.1312        |                |                  | 421.2445       | 211.1259         | T    | 1698.7527 | 849.8800        | 1681.7262      | 841.3667         | 1680.7421      | 840.8747         | 15 |
| 5  | 568.2977  | 284.6525        |                |                  | 550.2871       | 275.6472         | E    | 1615.7156 | 808.3614        | 1598.6890      | 799.8482         | 1597.7050      | 799.3562         | 14 |
| 6  | 697.3403  | 349.1738        |                |                  | 679.3297       | 340.1685         | E    | 1486.6730 | 743.8401        | 1469.6465      | 735.3269         | 1468.6624      | 734.8349         | 13 |
| 7  | 794.3931  | 397.7002        |                |                  | 776.3825       | 388.6949         | P    | 1357.6304 | 679.3188        | 1340.6039      | 670.8056         | 1339.6198      | 670.3136         | 12 |
| 8  | 881.4251  | 441.2162        |                |                  | 863.4145       | 432.2109         | S    | 1260.5776 | 630.7925        | 1243.5511      | 622.2792         | 1242.5671      | 621.7872         | 11 |
| 9  | 1010.4677 | 505.7375        |                |                  | 992.4571       | 496.7322         | E    | 1173.5456 | 587.2764        | 1156.5191      | 578.7632         | 1155.5351      | 578.2712         | 10 |
| 10 | 1139.5103 | 570.2588        |                |                  | 1121.4997      | 561.2535         | E    | 1044.5030 | 522.7551        | 1027.4765      | 514.2419         | 1026.4925      | 513.7499         | 9  |
| 11 | 1268.5529 | 634.7801        |                |                  | 1250.5423      | 625.7748         | E    | 915.4604  | 458.2339        | 898.4339       | 449.7206         | 897.4499       | 449.2286         | 8  |
| 12 | 1339.5900 | 670.2986        |                |                  | 1321.5794      | 661.2933         | A    | 786.4178  | 393.7126        | 769.3913       | 385.1993         | 768.4073       | 384.7073         | 7  |
| 13 | 1454.6169 | 727.8121        |                |                  | 1436.6064      | 718.8068         | D    | 715.3807  | 358.1940        | 698.3542       | 349.6807         | 697.3702       | 349.1887         | 6  |
| 14 | 1585.6574 | 793.3323        |                |                  | 1567.6468      | 784.3271         | M    | 600.3538  | 300.6805        | 583.3272       | 292.1673         |                |                  | 5  |
| 15 | 1682.7102 | 841.8587        |                |                  | 1664.6996      | 832.8534         | P    | 469.3133  | 235.1603        | 452.2867       | 226.6470         |                |                  | 4  |
| 16 | 1810.8051 | 905.9062        | 1793.7786      | 897.3929         | 1792.7946      | 896.9009         | K    | 372.2605  | 186.6339        | 355.2340       | 178.1206         |                |                  | 3  |
| 17 | 1907.8579 | 954.4326        | 1890.8314      | 945.9193         | 1889.8473      | 945.4273         | P    | 244.1656  | 122.5864        | 227.1390       | 114.0731         |                |                  | 2  |
| 18 |           |                 |                |                  |                |                  | K    | 147.1128  | 74.0600         | 130.0863       | 65.5468          |                |                  | 1  |

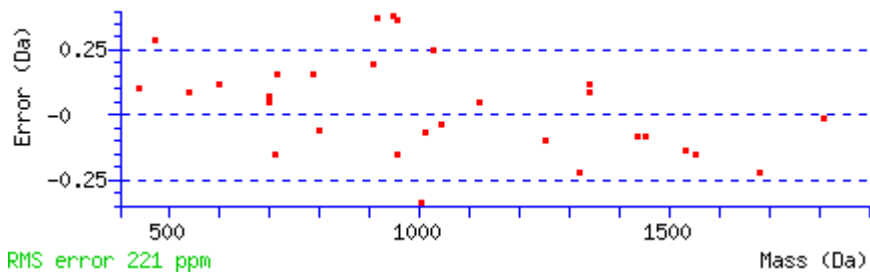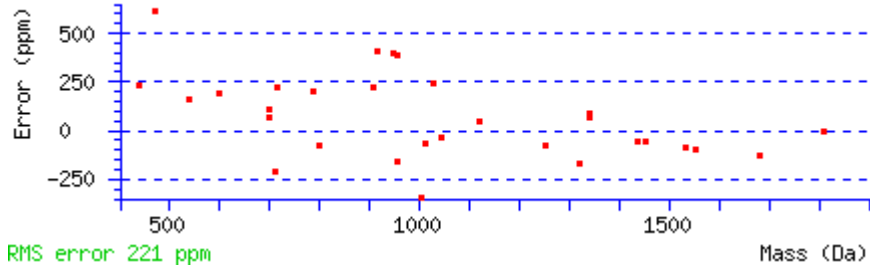

IDENTIFICATION 84

MS/MS Fragmentation of **SSGSPYGGGYGSGGGSGGYGSR**

Found in **IPI00269661**

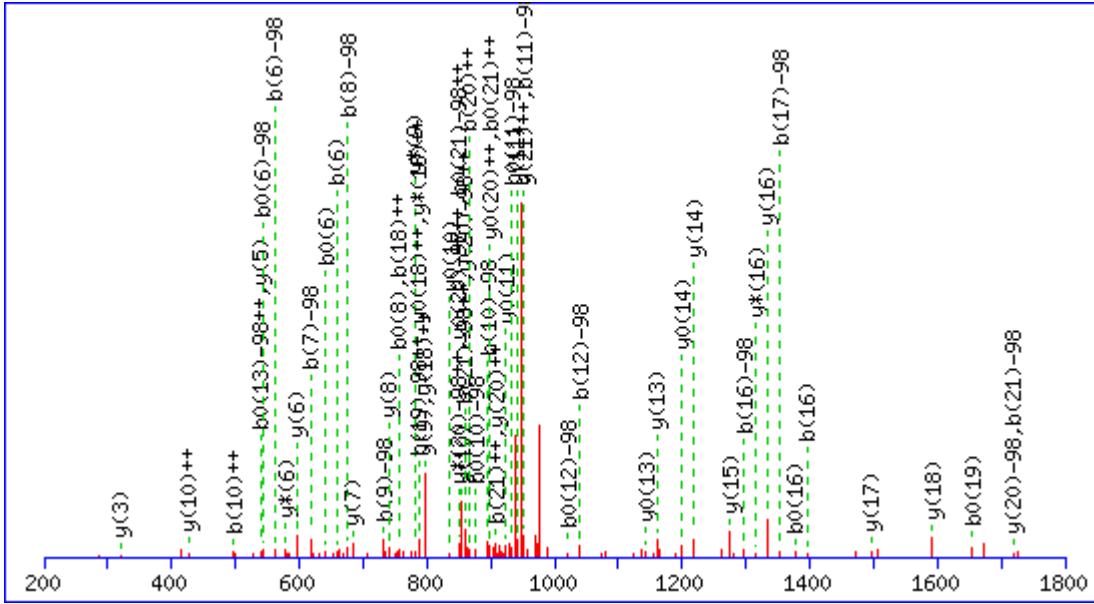

Monoisotopic mass of neutral peptide Mr(calc): 1989.7491

Fixed modifications: Carbamidomethyl (C) (apply to specified residues or termini only)

Variable modifications:

S4 : Phospho (ST), with neutral losses 97.9769 (shown in table), 0.0000

Ions Score: 97 Expect: 2.8e-08 (help)

| #  | b         | b <sup>++</sup> | b <sup>0</sup> | b <sup>0++</sup> | Seq. | y         | y <sup>++</sup> | y <sup>*</sup> | y <sup>+++</sup> | y <sup>0</sup> | y <sup>0++</sup> | #  |
|----|-----------|-----------------|----------------|------------------|------|-----------|-----------------|----------------|------------------|----------------|------------------|----|
| 1  | 88.0393   | 44.5233         | 70.0287        | 35.5180          | S    |           |                 |                |                  |                |                  | 22 |
| 2  | 175.0713  | 88.0393         | 157.0608       | 79.0340          | S    | 1805.7474 | 903.3773        | 1788.7208      | 894.8641         | 1787.7368      | 894.3720         | 21 |
| 3  | 232.0928  | 116.5500        | 214.0822       | 107.5448         | G    | 1718.7154 | 859.8613        | 1701.6888      | 851.3480         | 1700.7048      | 850.8560         | 20 |
| 4  | 301.1143  | 151.0608        | 283.1037       | 142.0555         | S    | 1661.6939 | 831.3506        | 1644.6673      | 822.8373         | 1643.6833      | 822.3453         | 19 |
| 5  | 398.1670  | 199.5871        | 380.1565       | 190.5819         | P    | 1592.6724 | 796.8399        | 1575.6459      | 788.3266         | 1574.6619      | 787.8346         | 18 |
| 6  | 561.2304  | 281.1188        | 543.2198       | 272.1135         | Y    | 1495.6197 | 748.3135        | 1478.5931      | 739.8002         | 1477.6091      | 739.3082         | 17 |
| 7  | 618.2518  | 309.6295        | 600.2413       | 300.6243         | G    | 1332.5563 | 666.7818        | 1315.5298      | 658.2685         | 1314.5458      | 657.7765         | 16 |
| 8  | 675.2733  | 338.1403        | 657.2627       | 329.1350         | G    | 1275.5349 | 638.2711        | 1258.5083      | 629.7578         | 1257.5243      | 629.2658         | 15 |
| 9  | 732.2947  | 366.6510        | 714.2842       | 357.6457         | G    | 1218.5134 | 609.7603        | 1201.4869      | 601.2471         | 1200.5028      | 600.7551         | 14 |
| 10 | 895.3581  | 448.1827        | 877.3475       | 439.1774         | Y    | 1161.4919 | 581.2496        | 1144.4654      | 572.7363         | 1143.4814      | 572.2443         | 13 |
| 11 | 952.3795  | 476.6934        | 934.3690       | 467.6881         | G    | 998.4286  | 499.7179        | 981.4021       | 491.2047         | 980.4180       | 490.7127         | 12 |
| 12 | 1039.4116 | 520.2094        | 1021.4010      | 511.2041         | S    | 941.4071  | 471.2072        | 924.3806       | 462.6939         | 923.3966       | 462.2019         | 11 |
| 13 | 1096.4330 | 548.7202        | 1078.4225      | 539.7149         | G    | 854.3751  | 427.6912        | 837.3486       | 419.1779         | 836.3646       | 418.6859         | 10 |
| 14 | 1153.4545 | 577.2309        | 1135.4439      | 568.2256         | G    | 797.3537  | 399.1805        | 780.3271       | 390.6672         | 779.3431       | 390.1752         | 9  |
| 15 | 1210.4760 | 605.7416        | 1192.4654      | 596.7363         | G    | 740.3322  | 370.6697        | 723.3056       | 362.1565         | 722.3216       | 361.6645         | 8  |
| 16 | 1297.5080 | 649.2576        | 1279.4974      | 640.2523         | S    | 683.3107  | 342.1590        | 666.2842       | 333.6457         | 665.3002       | 333.1537         | 7  |
| 17 | 1354.5294 | 677.7684        | 1336.5189      | 668.7631         | G    | 596.2787  | 298.6430        | 579.2522       | 290.1297         | 578.2681       | 289.6377         | 6  |
| 18 | 1411.5509 | 706.2791        | 1393.5403      | 697.2738         | G    | 539.2572  | 270.1323        | 522.2307       | 261.6190         | 521.2467       | 261.1270         | 5  |
| 19 | 1574.6142 | 787.8108        | 1556.6037      | 778.8055         | Y    | 482.2358  | 241.6215        | 465.2092       | 233.1082         | 464.2252       | 232.6162         | 4  |
| 20 | 1631.6357 | 816.3215        | 1613.6251      | 807.3162         | G    | 319.1724  | 160.0899        | 302.1459       | 151.5766         | 301.1619       | 151.0846         | 3  |
| 21 | 1718.6677 | 859.8375        | 1700.6572      | 850.8322         | S    | 262.1510  | 131.5791        | 245.1244       | 123.0659         | 244.1404       | 122.5738         | 2  |
| 22 |           |                 |                |                  | R    | 175.1190  | 88.0631         | 158.0924       | 79.5498          |                |                  | 1  |



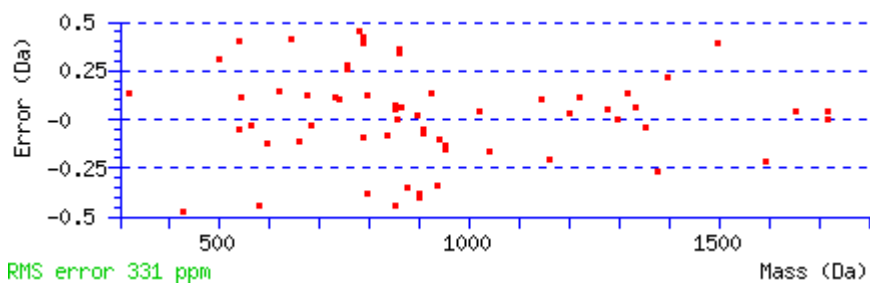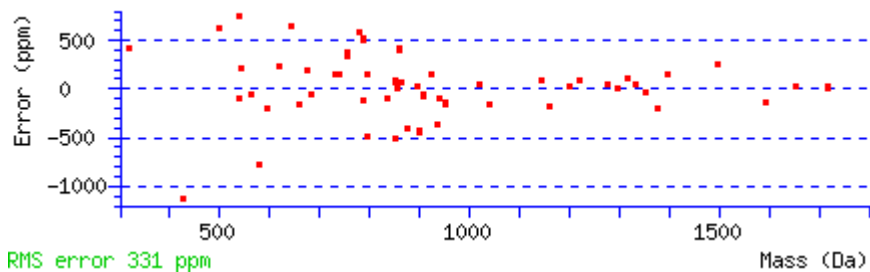

MS/MS Fragmentation of  
**GHYEVTVGSDDDEAGK**

Found in

**IP100553798**

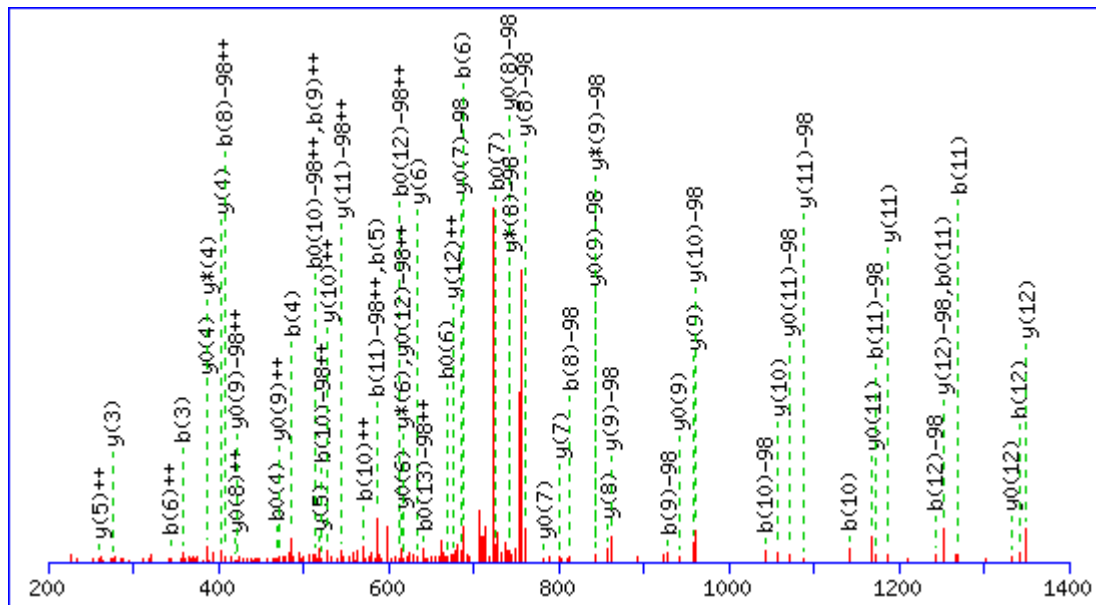

Monoisotopic mass of neutral peptide  $M_r(\text{calc})$ : 1543.5828

Fixed modifications: Carbamidomethyl (C) (apply to specified residues or termini only)

Variable modifications:

S8 : Phospho (ST), with neutral losses 97.9769 (shown in table), 0.0000

Ions Score: 47 Expect: 0.002 (help)

| #  | b         | b <sup>++</sup> | b <sup>0</sup> | b <sup>0++</sup> | Seq. | y         | y <sup>++</sup> | y <sup>*</sup> | y <sup>+++</sup> | y <sup>0</sup> | y <sup>0++</sup> | #  |
|----|-----------|-----------------|----------------|------------------|------|-----------|-----------------|----------------|------------------|----------------|------------------|----|
| 1  | 58.0287   | 29.5180         |                |                  | G    |           |                 |                |                  |                |                  | 14 |
| 2  | 195.0877  | 98.0475         |                |                  | H    | 1389.5917 | 695.2995        | 1372.5652      | 686.7862         | 1371.5812      | 686.2942         | 13 |
| 3  | 358.1510  | 179.5791        |                |                  | Y    | 1252.5328 | 626.7700        | 1235.5063      | 618.2568         | 1234.5222      | 617.7648         | 12 |
| 4  | 487.1936  | 244.1004        | 469.1830       | 235.0951         | E    | 1089.4695 | 545.2384        | 1072.4429      | 536.7251         | 1071.4589      | 536.2331         | 11 |
| 5  | 586.2620  | 293.6346        | 568.2514       | 284.6293         | V    | 960.4269  | 480.7171        | 943.4003       | 472.2038         | 942.4163       | 471.7118         | 10 |
| 6  | 687.3097  | 344.1585        | 669.2991       | 335.1532         | T    | 861.3585  | 431.1829        | 844.3319       | 422.6696         | 843.3479       | 422.1776         | 9  |
| 7  | 744.3311  | 372.6692        | 726.3206       | 363.6639         | G    | 760.3108  | 380.6590        | 743.2842       | 372.1458         | 742.3002       | 371.6537         | 8  |
| 8  | 813.3526  | 407.1799        | 795.3420       | 398.1747         | S    | 703.2893  | 352.1483        | 686.2628       | 343.6350         | 685.2788       | 343.1430         | 7  |
| 9  | 928.3795  | 464.6934        | 910.3690       | 455.6881         | D    | 634.2679  | 317.6376        | 617.2413       | 309.1243         | 616.2573       | 308.6323         | 6  |
| 10 | 1043.4065 | 522.2069        | 1025.3959      | 513.2016         | D    | 519.2409  | 260.1241        | 502.2144       | 251.6108         | 501.2304       | 251.1188         | 5  |
| 11 | 1172.4491 | 586.7282        | 1154.4385      | 577.7229         | E    | 404.2140  | 202.6106        | 387.1874       | 194.0974         | 386.2034       | 193.6053         | 4  |
| 12 | 1243.4862 | 622.2467        | 1225.4756      | 613.2414         | A    | 275.1714  | 138.0893        | 258.1448       | 129.5761         |                |                  | 3  |
| 13 | 1300.5077 | 650.7575        | 1282.4971      | 641.7522         | G    | 204.1343  | 102.5708        | 187.1077       | 94.0575          |                |                  | 2  |
| 14 |           |                 |                |                  | K    | 147.1128  | 74.0600         | 130.0863       | 65.5468          |                |                  | 1  |

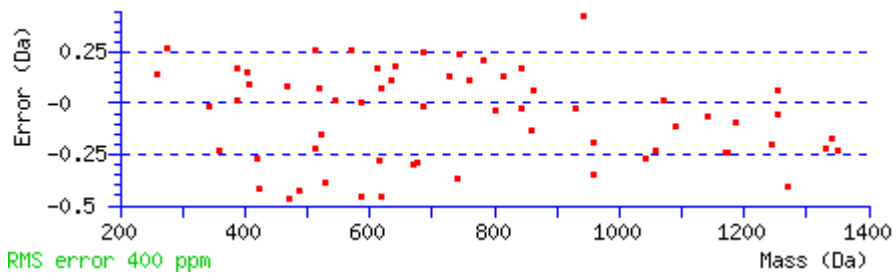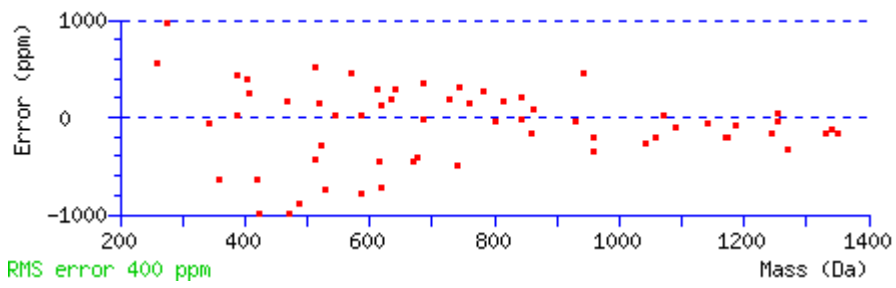



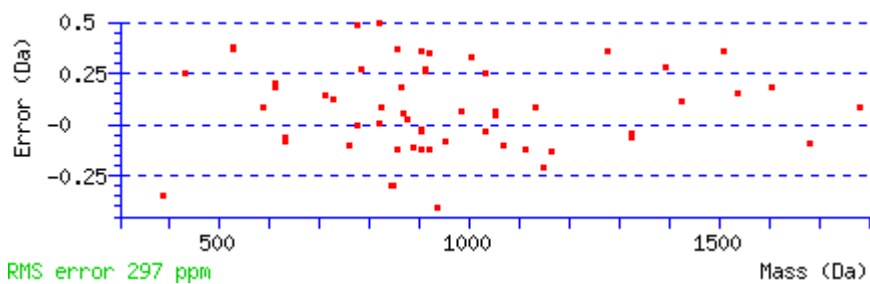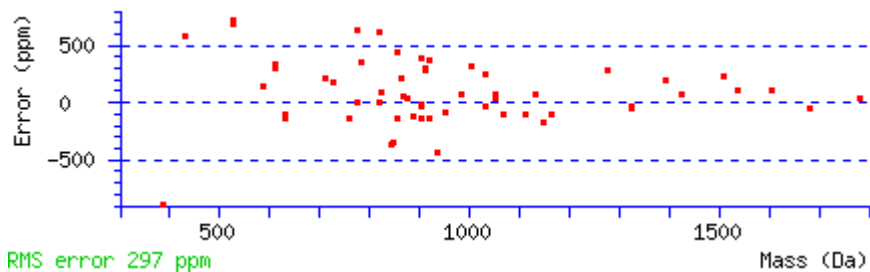

IDENTIFICATION 87

MS/MS Fragmentation of **MSVFLVNTPQGLLTFK**

Found in **IPI00885690**

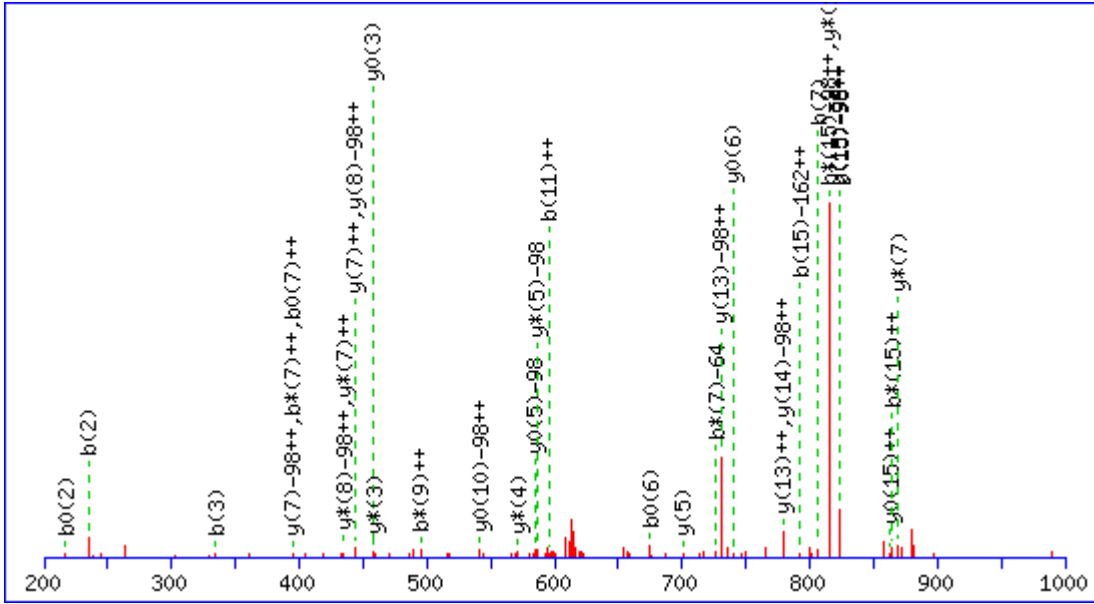

Monoisotopic mass of neutral peptide Mr(calc): 1889.9362

Fixed modifications: Carbamidomethyl (C) (apply to specified residues or termini only)

Variable modifications:

M1 : Oxidation (M), with neutral losses 0.0000(shown in table), 63.9983

T14 : Phospho (ST), with neutral losses 97.9769(shown in table), 0.0000

Ions Score: 21 Expect: 0.86 (help)

| #  | b         | b <sup>++</sup> | b <sup>*</sup> | b <sup>+++</sup> | b <sup>0</sup> | b <sup>0++</sup> | Seq. | y         | y <sup>++</sup> | y <sup>*</sup> | y <sup>+++</sup> | y <sub>0</sub> | y <sup>0++</sup> | #  |
|----|-----------|-----------------|----------------|------------------|----------------|------------------|------|-----------|-----------------|----------------|------------------|----------------|------------------|----|
| 1  | 148.0427  | 74.5250         |                |                  |                |                  | M    |           |                 |                |                  |                |                  | 16 |
| 2  | 235.0747  | 118.0410        |                |                  | 217.0641       | 109.0357         | S    | 1645.9312 | 823.4692        | 1628.9047      | 814.9560         | 1627.9206      | 814.4640         | 15 |
| 3  | 334.1431  | 167.5752        |                |                  | 316.1326       | 158.5699         | V    | 1558.8992 | 779.9532        | 1541.8726      | 771.4400         | 1540.8886      | 770.9479         | 14 |
| 4  | 481.2115  | 241.1094        |                |                  | 463.2010       | 232.1041         | F    | 1459.8308 | 730.4190        | 1442.8042      | 721.9057         | 1441.8202      | 721.4137         | 13 |
| 5  | 594.2956  | 297.6514        |                |                  | 576.2850       | 288.6462         | L    | 1312.7623 | 656.8848        | 1295.7358      | 648.3715         | 1294.7518      | 647.8795         | 12 |
| 6  | 693.3640  | 347.1856        |                |                  | 675.3534       | 338.1804         | V    | 1199.6783 | 600.3428        | 1182.6517      | 591.8295         | 1181.6677      | 591.3375         | 11 |
| 7  | 807.4069  | 404.2071        | 790.3804       | 395.6938         | 789.3964       | 395.2018         | N    | 1100.6099 | 550.8086        | 1083.5833      | 542.2953         | 1082.5993      | 541.8033         | 10 |
| 8  | 908.4546  | 454.7309        | 891.4281       | 446.2177         | 890.4441       | 445.7257         | T    | 986.5669  | 493.7871        | 969.5404       | 485.2738         | 968.5564       | 484.7818         | 9  |
| 9  | 1005.5074 | 503.2573        | 988.4808       | 494.7441         | 987.4968       | 494.2520         | P    | 885.5193  | 443.2633        | 868.4927       | 434.7500         | 867.5087       | 434.2580         | 8  |
| 10 | 1133.5660 | 567.2866        | 1116.5394      | 558.7733         | 1115.5554      | 558.2813         | Q    | 788.4665  | 394.7369        | 771.4400       | 386.2236         | 770.4559       | 385.7316         | 7  |
| 11 | 1190.5874 | 595.7973        | 1173.5609      | 587.2841         | 1172.5769      | 586.7921         | G    | 660.4079  | 330.7076        | 643.3814       | 322.1943         | 642.3974       | 321.7023         | 6  |
| 12 | 1303.6715 | 652.3394        | 1286.6449      | 643.8261         | 1285.6609      | 643.3341         | L    | 603.3865  | 302.1969        | 586.3599       | 293.6836         | 585.3759       | 293.1916         | 5  |
| 13 | 1416.7555 | 708.8814        | 1399.7290      | 700.3681         | 1398.7450      | 699.8761         | L    | 490.3024  | 245.6548        | 473.2758       | 237.1416         | 472.2918       | 236.6496         | 4  |
| 14 | 1499.7927 | 750.4000        | 1482.7661      | 741.8867         | 1481.7821      | 741.3947         | T    | 377.2183  | 189.1128        | 360.1918       | 180.5995         | 359.2078       | 180.1075         | 3  |
| 15 | 1646.8611 | 823.9342        | 1629.8345      | 815.4209         | 1628.8505      | 814.9289         | F    | 294.1812  | 147.5942        | 277.1547       | 139.0810         |                |                  | 2  |
| 16 |           |                 |                |                  |                |                  | K    | 147.1128  | 74.0600         | 130.0863       | 65.5468          |                |                  | 1  |

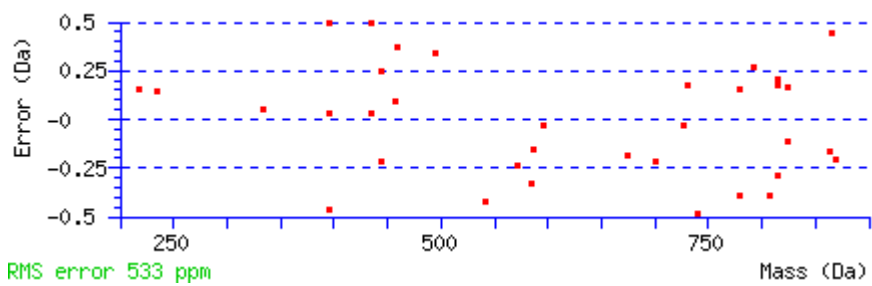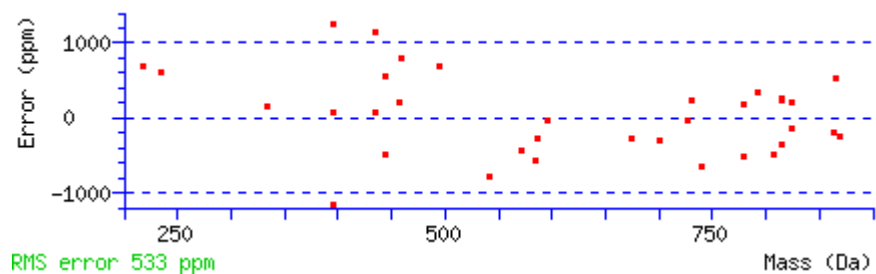

IDENTIFICATION 88

MS/MS Fragmentation of **KLSPTEPR**

Found in **IPI00132604**

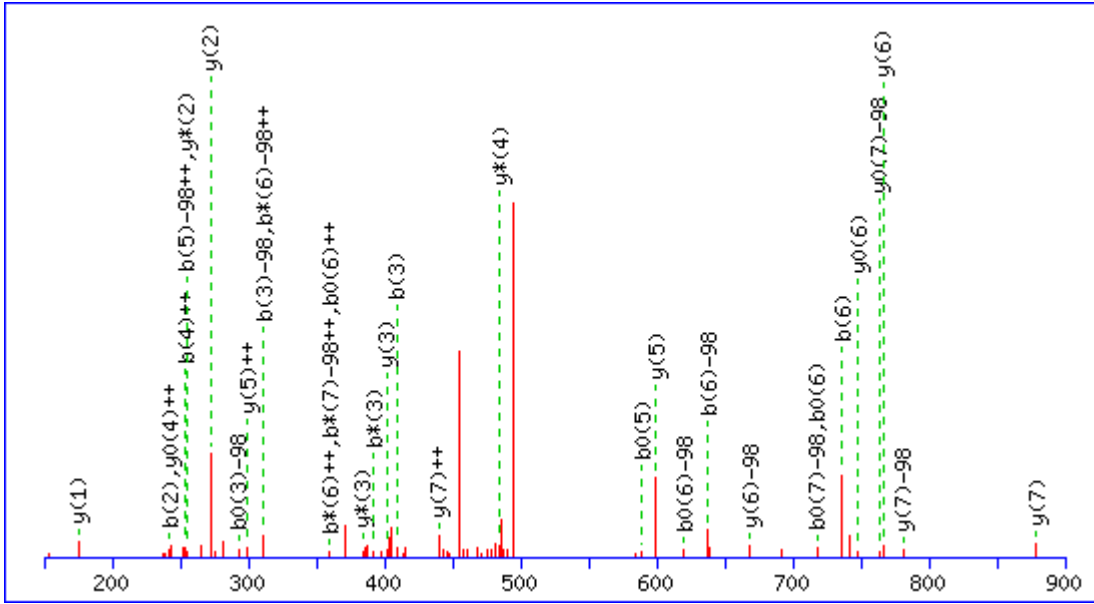

Monoisotopic mass of neutral peptide Mr(calc): 1006.4848 Fixed modifications: Carbamidomethyl (C) (apply to specified residues or termini only) Variable modifications: S3 : Phospho (ST), with neutral losses 0.0000 (shown in table), 97.9769 Ions Score: 41 Expect: 0.0051 (help)

| # | b        | b <sup>++</sup> | b <sup>*</sup> | b <sup>+++</sup> | b <sup>0</sup> | b <sup>0++</sup> | Seq. | y        | y <sup>++</sup> | y <sup>*</sup> | y <sup>+++</sup> | y <sup>0</sup> | y <sup>0++</sup> | # |
|---|----------|-----------------|----------------|------------------|----------------|------------------|------|----------|-----------------|----------------|------------------|----------------|------------------|---|
| 1 | 129.1022 | 65.0548         | 112.0757       | 56.5415          |                |                  | K    |          |                 |                |                  |                |                  | 8 |
| 2 | 242.1863 | 121.5968        | 225.1598       | 113.0835         |                |                  | L    | 879.3972 | 440.2022        | 862.3706       | 431.6890         | 861.3866       | 431.1969         | 7 |
| 3 | 409.1847 | 205.0960        | 392.1581       | 196.5827         | 391.1741       | 196.0907         | S    | 766.3131 | 383.6602        | 749.2866       | 375.1469         | 748.3025       | 374.6549         | 6 |
| 4 | 506.2374 | 253.6224        | 489.2109       | 245.1091         | 488.2269       | 244.6171         | P    | 599.3148 | 300.1610        | 582.2882       | 291.6477         | 581.3042       | 291.1557         | 5 |
| 5 | 607.2851 | 304.1462        | 590.2586       | 295.6329         | 589.2745       | 295.1409         | T    | 502.2620 | 251.6346        | 485.2354       | 243.1214         | 484.2514       | 242.6293         | 4 |
| 6 | 736.3277 | 368.6675        | 719.3011       | 360.1542         | 718.3171       | 359.6622         | E    | 401.2143 | 201.1108        | 384.1878       | 192.5975         | 383.2037       | 192.1055         | 3 |
| 7 | 833.3805 | 417.1939        | 816.3539       | 408.6806         | 815.3699       | 408.1886         | P    | 272.1717 | 136.5895        | 255.1452       | 128.0762         |                |                  | 2 |
| 8 |          |                 |                |                  |                |                  | R    | 175.1190 | 88.0631         | 158.0924       | 79.5498          |                |                  | 1 |

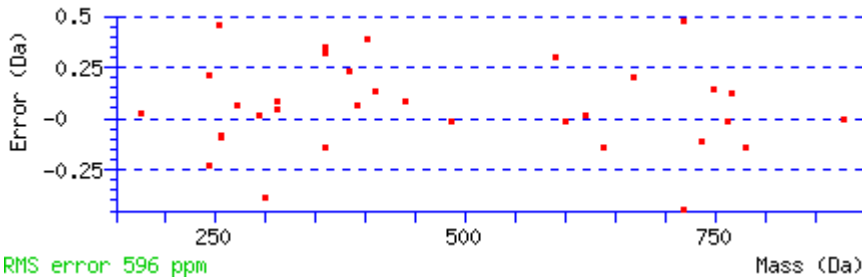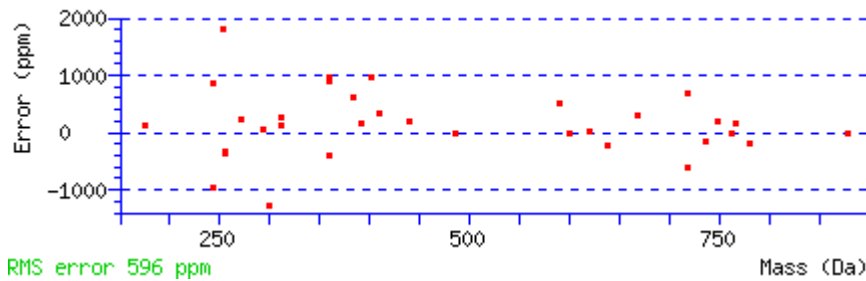



IDENTIFICATION 89

MS/MS Fragmentation of **RFATR**

Found in **IPI00653851**

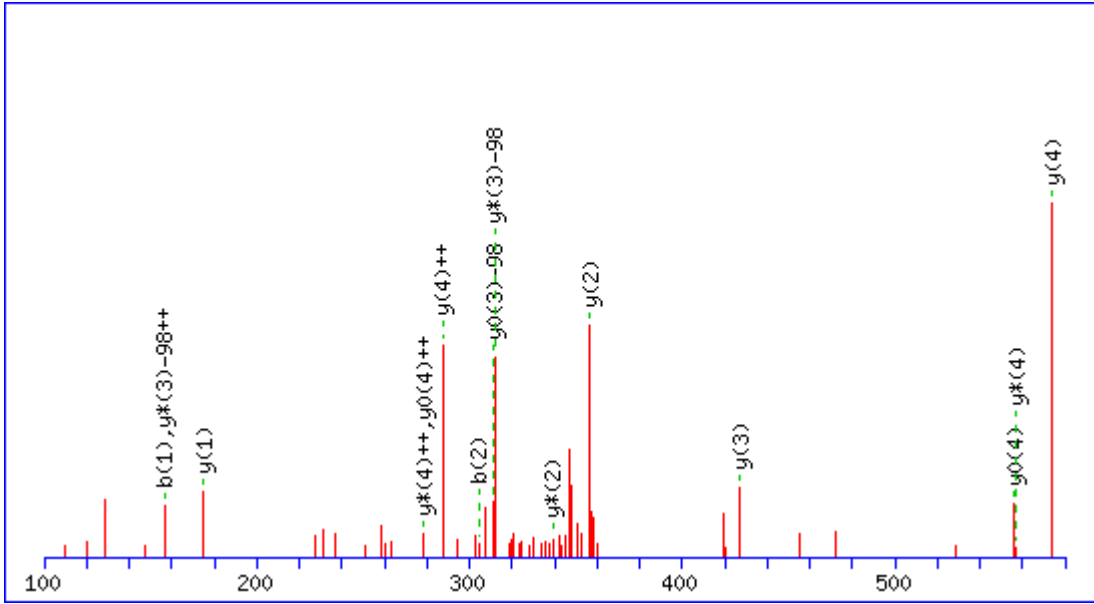

Monoisotopic mass of neutral peptide  $M_r(\text{calc})$ : 729.3323

Fixed modifications: Carbamidomethyl (C) (apply to specified residues or termini only)

Variable modifications:

T4 : Phospho (ST), with neutral losses 0.0000 (shown in table), 97.9769

Ions Score: 41 Expect: 0.0018 (help)

| # | b        | b <sup>++</sup> | b <sup>*</sup> | b <sup>+++</sup> | b <sup>0</sup> | b <sup>0++</sup> | Seq. | y        | y <sup>++</sup> | y <sup>*</sup> | y <sup>+++</sup> | y <sup>0</sup> | y <sup>0++</sup> | # |
|---|----------|-----------------|----------------|------------------|----------------|------------------|------|----------|-----------------|----------------|------------------|----------------|------------------|---|
| 1 | 157.1084 | 79.0578         | 140.0818       | 70.5446          |                |                  | R    |          |                 |                |                  |                |                  | 5 |
| 2 | 304.1768 | 152.5920        | 287.1503       | 144.0788         |                |                  | F    | 574.2385 | 287.6229        | 557.2119       | 279.1096         | 556.2279       | 278.6176         | 4 |
| 3 | 375.2139 | 188.1106        | 358.1874       | 179.5973         |                |                  | A    | 427.1701 | 214.0887        | 410.1435       | 205.5754         | 409.1595       | 205.0834         | 3 |
| 4 | 556.2279 | 278.6176        | 539.2014       | 270.1043         | 538.2174       | 269.6123         | T    | 356.1330 | 178.5701        | 339.1064       | 170.0568         | 338.1224       | 169.5648         | 2 |
| 5 |          |                 |                |                  |                |                  | R    | 175.1190 | 88.0631         | 158.0924       | 79.5498          |                |                  | 1 |

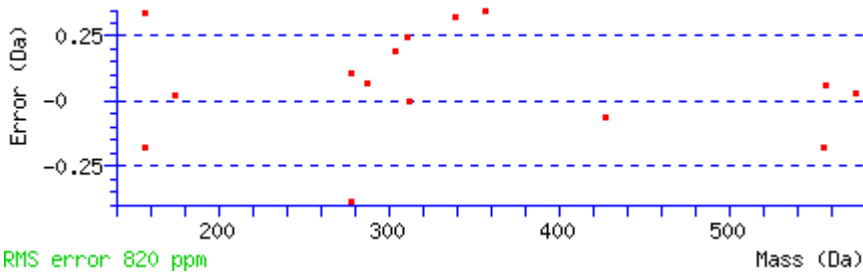

RMS error 820 ppm

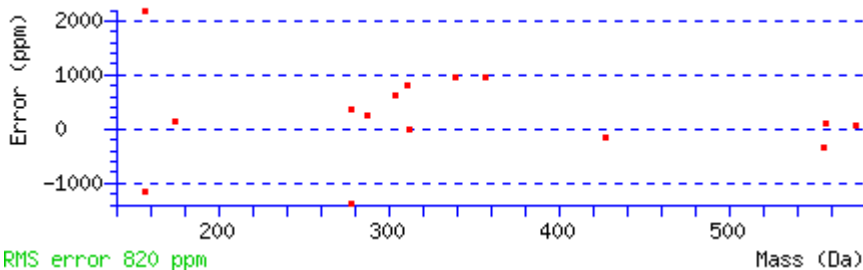

RMS error 820 ppm

IDENTIFICATION 90

MS/MS Fragmentation of EIITEEPSEEEADMPKPK

Found in IPI00120691

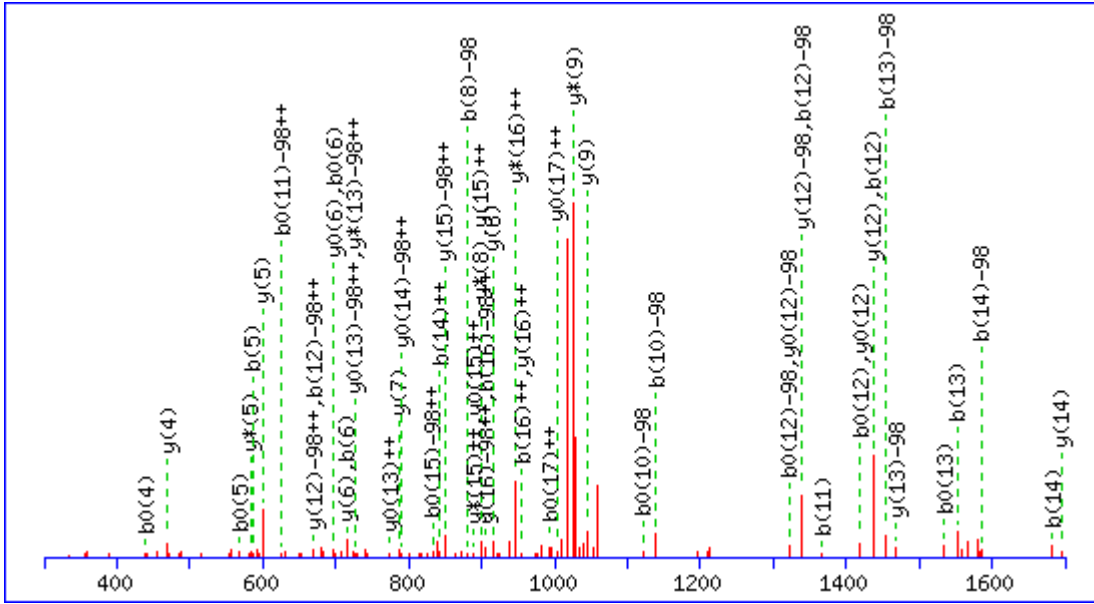

Monoisotopic mass of neutral peptide Mr(calc): 2150.9330

Fixed modifications: Carbamidomethyl (C) (apply to specified residues or termini only)

Variable modifications:

S8 : Phospho (ST), with neutral losses 97.9769 (shown in table), 0.0000

Ions Score: 34 Expect: 0.085 (help)

| #  | b         | b <sup>++</sup> | b <sup>*</sup> | b <sup>+++</sup> | b <sup>0</sup> | b <sup>0++</sup> | Seq. | y         | y <sup>++</sup> | y <sup>*</sup> | y <sup>*++</sup> | y <sup>0</sup> | y <sup>0++</sup> | #  |
|----|-----------|-----------------|----------------|------------------|----------------|------------------|------|-----------|-----------------|----------------|------------------|----------------|------------------|----|
| 1  | 130.0499  | 65.5286         |                |                  | 112.0393       | 56.5233          | E    |           |                 |                |                  |                |                  | 18 |
| 2  | 243.1339  | 122.0706        |                |                  | 225.1234       | 113.0653         | I    | 1924.9208 | 962.9641        | 1907.8943      | 954.4508         | 1906.9103      | 953.9588         | 17 |
| 3  | 356.2180  | 178.6126        |                |                  | 338.2074       | 169.6074         | I    | 1811.8368 | 906.4220        | 1794.8102      | 897.9087         | 1793.8262      | 897.4167         | 16 |
| 4  | 457.2657  | 229.1365        |                |                  | 439.2551       | 220.1312         | T    | 1698.7527 | 849.8800        | 1681.7262      | 841.3667         | 1680.7421      | 840.8747         | 15 |
| 5  | 586.3083  | 293.6578        |                |                  | 568.2977       | 284.6525         | E    | 1597.7050 | 799.3562        | 1580.6785      | 790.8429         | 1579.6945      | 790.3509         | 14 |
| 6  | 715.3509  | 358.1791        |                |                  | 697.3403       | 349.1738         | E    | 1468.6624 | 734.8349        | 1451.6359      | 726.3216         | 1450.6519      | 725.8296         | 13 |
| 7  | 812.4036  | 406.7055        |                |                  | 794.3931       | 397.7002         | P    | 1339.6198 | 670.3136        | 1322.5933      | 661.8003         | 1321.6093      | 661.3083         | 12 |
| 8  | 881.4251  | 441.2162        |                |                  | 863.4145       | 432.2109         | S    | 1242.5671 | 621.7872        | 1225.5405      | 613.2739         | 1224.5565      | 612.7819         | 11 |
| 9  | 1010.4677 | 505.7375        |                |                  | 992.4571       | 496.7322         | E    | 1173.5456 | 587.2764        | 1156.5191      | 578.7632         | 1155.5351      | 578.2712         | 10 |
| 10 | 1139.5103 | 570.2588        |                |                  | 1121.4997      | 561.2535         | E    | 1044.5030 | 522.7551        | 1027.4765      | 514.2419         | 1026.4925      | 513.7499         | 9  |
| 11 | 1268.5529 | 634.7801        |                |                  | 1250.5423      | 625.7748         | E    | 915.4604  | 458.2339        | 898.4339       | 449.7206         | 897.4499       | 449.2286         | 8  |
| 12 | 1339.5900 | 670.2986        |                |                  | 1321.5794      | 661.2933         | A    | 786.4178  | 393.7126        | 769.3913       | 385.1993         | 768.4073       | 384.7073         | 7  |
| 13 | 1454.6169 | 727.8121        |                |                  | 1436.6064      | 718.8068         | D    | 715.3807  | 358.1940        | 698.3542       | 349.6807         | 697.3702       | 349.1887         | 6  |
| 14 | 1585.6574 | 793.3323        |                |                  | 1567.6468      | 784.3271         | M    | 600.3538  | 300.6805        | 583.3272       | 292.1673         |                |                  | 5  |
| 15 | 1682.7102 | 841.8587        |                |                  | 1664.6996      | 832.8534         | P    | 469.3133  | 235.1603        | 452.2867       | 226.6470         |                |                  | 4  |
| 16 | 1810.8051 | 905.9062        | 1793.7786      | 897.3929         | 1792.7946      | 896.9009         | K    | 372.2605  | 186.6339        | 355.2340       | 178.1206         |                |                  | 3  |
| 17 | 1907.8579 | 954.4326        | 1890.8314      | 945.9193         | 1889.8473      | 945.4273         | P    | 244.1656  | 122.5864        | 227.1390       | 114.0731         |                |                  | 2  |
| 18 |           |                 |                |                  |                |                  | K    | 147.1128  | 74.0600         | 130.0863       | 65.5468          |                |                  | 1  |

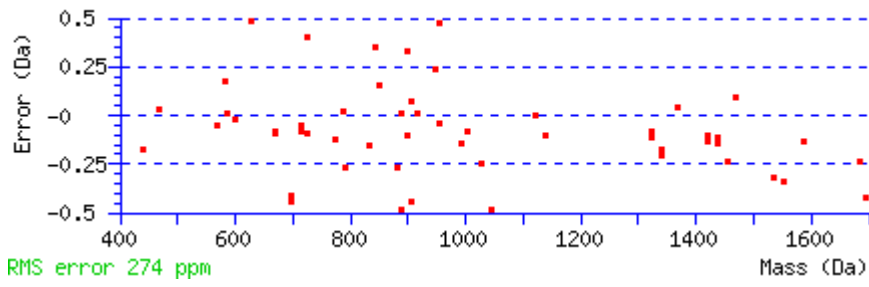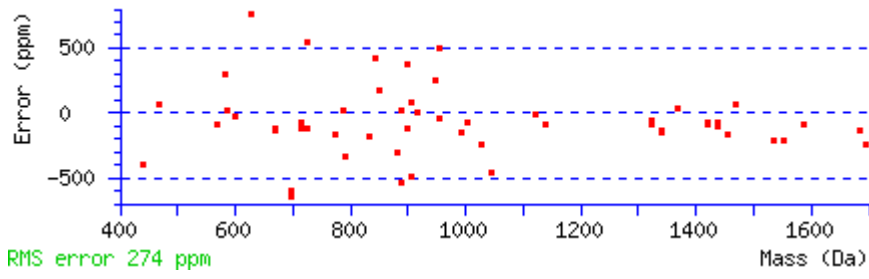

IDENTIFICATION 91

MS/MS Fragmentation of **EQGVESPGAQPASSPR**

Found in **IPI00342749**

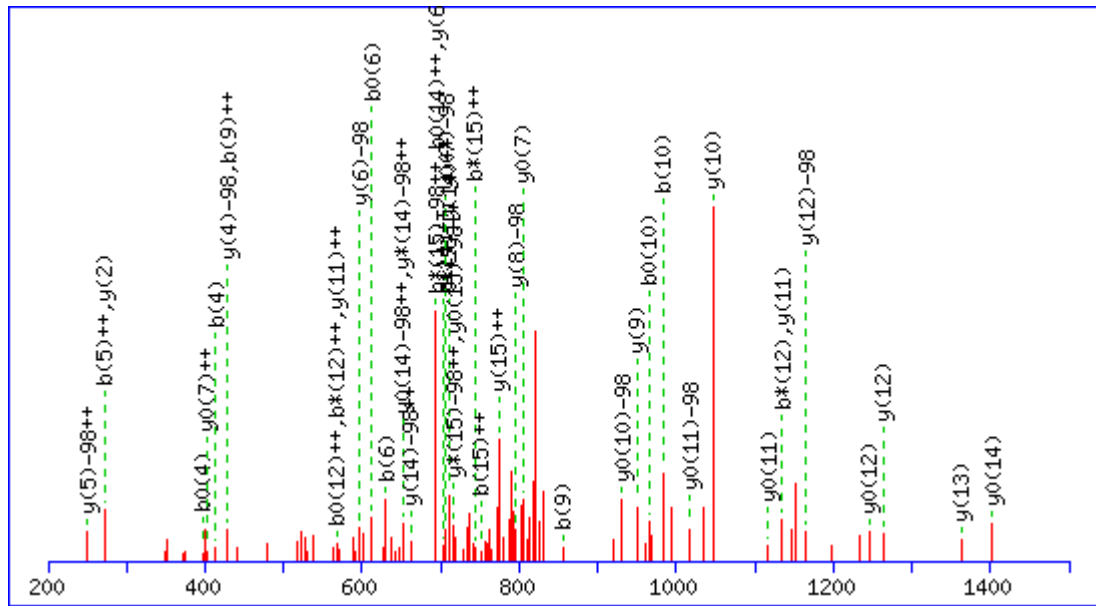

Monoisotopic mass of neutral peptide Mr(calc): 1675.7203

Fixed modifications: Carbamidomethyl (C) (apply to specified residues or termini only)

Variable modifications:

S14 : Phospho (ST), with neutral losses 0.0000(shown in table), 97.9769

Ions Score: 41 Expect: 0.011 (help)

| #  | b         | b <sup>++</sup> | b <sup>*</sup> | b <sup>+++</sup> | b <sup>0</sup> | b <sup>0++</sup> | Seq. | y         | y <sup>++</sup> | y <sup>*</sup> | y <sup>+++</sup> | y <sup>0</sup> | y <sup>0++</sup> | #  |
|----|-----------|-----------------|----------------|------------------|----------------|------------------|------|-----------|-----------------|----------------|------------------|----------------|------------------|----|
| 1  | 130.0499  | 65.5286         |                |                  | 112.0393       | 56.5233          | E    |           |                 |                |                  |                |                  | 16 |
| 2  | 258.1084  | 129.5579        | 241.0819       | 121.0446         | 240.0979       | 120.5526         | Q    | 1547.6850 | 774.3461        | 1530.6584      | 765.8329         | 1529.6744      | 765.3408         | 15 |
| 3  | 315.1299  | 158.0686        | 298.1034       | 149.5553         | 297.1193       | 149.0633         | G    | 1419.6264 | 710.3168        | 1402.5999      | 701.8036         | 1401.6158      | 701.3116         | 14 |
| 4  | 414.1983  | 207.6028        | 397.1718       | 199.0895         | 396.1878       | 198.5975         | V    | 1362.6049 | 681.8061        | 1345.5784      | 673.2928         | 1344.5944      | 672.8008         | 13 |
| 5  | 543.2409  | 272.1241        | 526.2144       | 263.6108         | 525.2304       | 263.1188         | E    | 1263.5365 | 632.2719        | 1246.5100      | 623.7586         | 1245.5260      | 623.2666         | 12 |
| 6  | 630.2729  | 315.6401        | 613.2464       | 307.1268         | 612.2624       | 306.6348         | S    | 1134.4939 | 567.7506        | 1117.4674      | 559.2373         | 1116.4834      | 558.7453         | 11 |
| 7  | 727.3257  | 364.1665        | 710.2992       | 355.6532         | 709.3151       | 355.1612         | P    | 1047.4619 | 524.2346        | 1030.4354      | 515.7213         | 1029.4513      | 515.2293         | 10 |
| 8  | 784.3472  | 392.6772        | 767.3206       | 384.1640         | 766.3366       | 383.6719         | G    | 950.4091  | 475.7082        | 933.3826       | 467.1949         | 932.3986       | 466.7029         | 9  |
| 9  | 855.3843  | 428.1958        | 838.3577       | 419.6825         | 837.3737       | 419.1905         | A    | 893.3877  | 447.1975        | 876.3611       | 438.6842         | 875.3771       | 438.1922         | 8  |
| 10 | 983.4429  | 492.2251        | 966.4163       | 483.7118         | 965.4323       | 483.2198         | Q    | 822.3506  | 411.6789        | 805.3240       | 403.1656         | 804.3400       | 402.6736         | 7  |
| 11 | 1080.4956 | 540.7515        | 1063.4691      | 532.2382         | 1062.4851      | 531.7462         | P    | 694.2920  | 347.6496        | 677.2654       | 339.1364         | 676.2814       | 338.6443         | 6  |
| 12 | 1151.5327 | 576.2700        | 1134.5062      | 567.7567         | 1133.5222      | 567.2647         | A    | 597.2392  | 299.1232        | 580.2127       | 290.6100         | 579.2287       | 290.1180         | 5  |
| 13 | 1238.5648 | 619.7860        | 1221.5382      | 611.2727         | 1220.5542      | 610.7807         | S    | 526.2021  | 263.6047        | 509.1756       | 255.0914         | 508.1915       | 254.5994         | 4  |
| 14 | 1405.5631 | 703.2852        | 1388.5366      | 694.7719         | 1387.5526      | 694.2799         | S    | 439.1701  | 220.0887        | 422.1435       | 211.5754         | 421.1595       | 211.0834         | 3  |
| 15 | 1502.6159 | 751.8116        | 1485.5893      | 743.2983         | 1484.6053      | 742.8063         | P    | 272.1717  | 136.5895        | 255.1452       | 128.0762         |                |                  | 2  |
| 16 |           |                 |                |                  |                |                  | R    | 175.1190  | 88.0631         | 158.0924       | 79.5498          |                |                  | 1  |

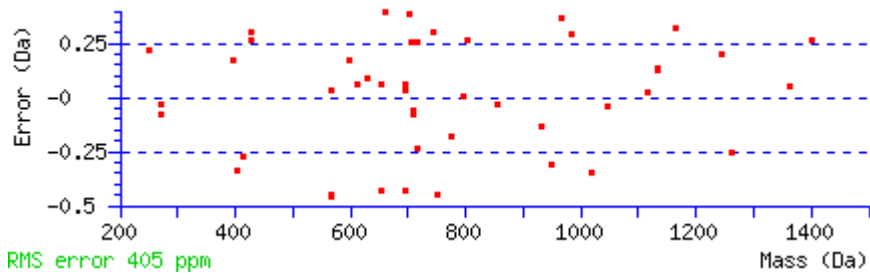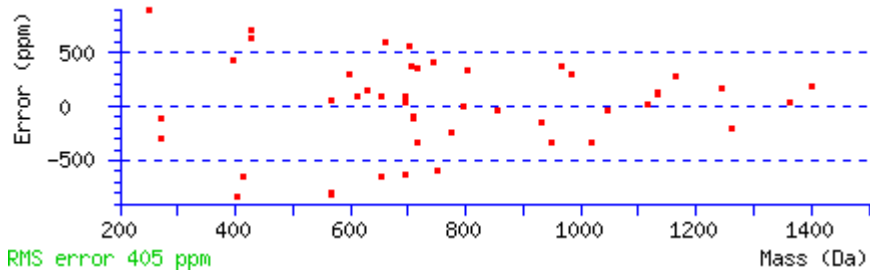

IDENTIFICATION 92

MS/MS Fragmentation of SETAPAETAAPAPVEKSPA

Found in IPI00230133

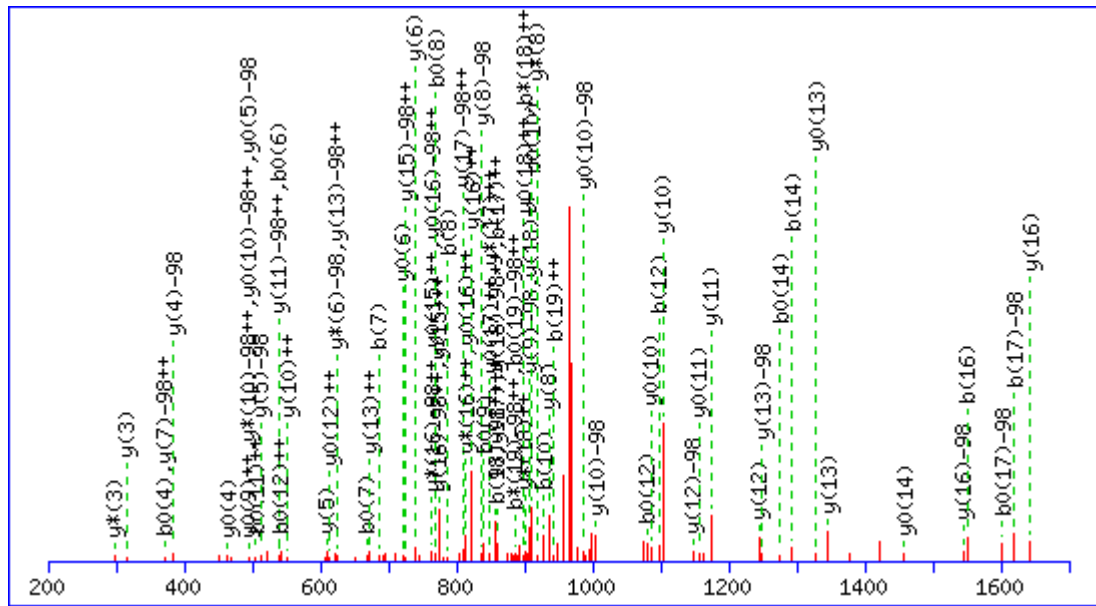

Monoisotopic mass of neutral peptide Mr(calc): 2030.9561

Fixed modifications: Carbamidomethyl (C) (apply to specified residues or termini only)

Variable modifications:

S17 : Phospho (ST), with neutral losses 97.9769 (shown in table), 0.0000

Ions Score: 54 Expect: 0.00065 (help)

| #  | b         | b <sup>++</sup> | b <sup>*</sup> | b <sup>+++</sup> | b <sup>0</sup> | b <sup>0++</sup> | Seq. | y         | y <sup>++</sup> | y <sup>*</sup> | y <sup>+++</sup> | y <sup>0</sup> | y <sup>0++</sup> | #  |
|----|-----------|-----------------|----------------|------------------|----------------|------------------|------|-----------|-----------------|----------------|------------------|----------------|------------------|----|
| 1  | 88.0393   | 44.5233         |                |                  | 70.0287        | 35.5180          | S    |           |                 |                |                  |                |                  | 20 |
| 2  | 217.0819  | 109.0446        |                |                  | 199.0713       | 100.0393         | E    | 1846.9545 | 923.9809        | 1829.9280      | 915.4676         | 1828.9440      | 914.9756         | 19 |
| 3  | 318.1296  | 159.5684        |                |                  | 300.1190       | 150.5631         | T    | 1717.9119 | 859.4596        | 1700.8854      | 850.9463         | 1699.9014      | 850.4543         | 18 |
| 4  | 389.1667  | 195.0870        |                |                  | 371.1561       | 186.0817         | A    | 1616.8642 | 808.9358        | 1599.8377      | 800.4225         | 1598.8537      | 799.9305         | 17 |
| 5  | 486.2195  | 243.6134        |                |                  | 468.2089       | 234.6081         | P    | 1545.8271 | 773.4172        | 1528.8006      | 764.9039         | 1527.8166      | 764.4119         | 16 |
| 6  | 557.2566  | 279.1319        |                |                  | 539.2460       | 270.1266         | A    | 1448.7744 | 724.8908        | 1431.7478      | 716.3775         | 1430.7638      | 715.8855         | 15 |
| 7  | 686.2992  | 343.6532        |                |                  | 668.2886       | 334.6479         | E    | 1377.7373 | 689.3723        | 1360.7107      | 680.8590         | 1359.7267      | 680.3670         | 14 |
| 8  | 787.3468  | 394.1771        |                |                  | 769.3363       | 385.1718         | T    | 1248.6947 | 624.8510        | 1231.6681      | 616.3377         | 1230.6841      | 615.8457         | 13 |
| 9  | 858.3840  | 429.6956        |                |                  | 840.3734       | 420.6903         | A    | 1147.6470 | 574.3271        | 1130.6204      | 565.8139         | 1129.6364      | 565.3218         | 12 |
| 10 | 929.4211  | 465.2142        |                |                  | 911.4105       | 456.2089         | A    | 1076.6099 | 538.8086        | 1059.5833      | 530.2953         | 1058.5993      | 529.8033         | 11 |
| 11 | 1026.4738 | 513.7406        |                |                  | 1008.4633      | 504.7353         | P    | 1005.5728 | 503.2900        | 988.5462       | 494.7767         | 987.5622       | 494.2847         | 10 |
| 12 | 1097.5109 | 549.2591        |                |                  | 1079.5004      | 540.2538         | A    | 908.5200  | 454.7636        | 891.4934       | 446.2504         | 890.5094       | 445.7584         | 9  |
| 13 | 1194.5637 | 597.7855        |                |                  | 1176.5531      | 588.7802         | P    | 837.4829  | 419.2451        | 820.4563       | 410.7318         | 819.4723       | 410.2398         | 8  |
| 14 | 1293.6321 | 647.3197        |                |                  | 1275.6216      | 638.3144         | V    | 740.4301  | 370.7187        | 723.4036       | 362.2054         | 722.4196       | 361.7134         | 7  |
| 15 | 1422.6747 | 711.8410        |                |                  | 1404.6642      | 702.8357         | E    | 641.3617  | 321.1845        | 624.3352       | 312.6712         | 623.3511       | 312.1792         | 6  |
| 16 | 1550.7697 | 775.8885        | 1533.7431      | 767.3752         | 1532.7591      | 766.8832         | K    | 512.3191  | 256.6632        | 495.2926       | 248.1499         | 494.3085       | 247.6579         | 5  |
| 17 | 1619.7911 | 810.3992        | 1602.7646      | 801.8859         | 1601.7806      | 801.3939         | S    | 384.2241  | 192.6157        | 367.1976       | 184.1024         | 366.2136       | 183.6104         | 4  |
| 18 | 1716.8439 | 858.9256        | 1699.8174      | 850.4123         | 1698.8333      | 849.9203         | P    | 315.2027  | 158.1050        | 298.1761       | 149.5917         |                |                  | 3  |
| 19 | 1787.8810 | 894.4441        | 1770.8545      | 885.9309         | 1769.8705      | 885.4389         | A    | 218.1499  | 109.5786        | 201.1234       | 101.0653         |                |                  | 2  |
| 20 |           |                 |                |                  |                |                  | K    | 147.1128  | 74.0600         | 130.0863       | 65.5468          |                |                  | 1  |

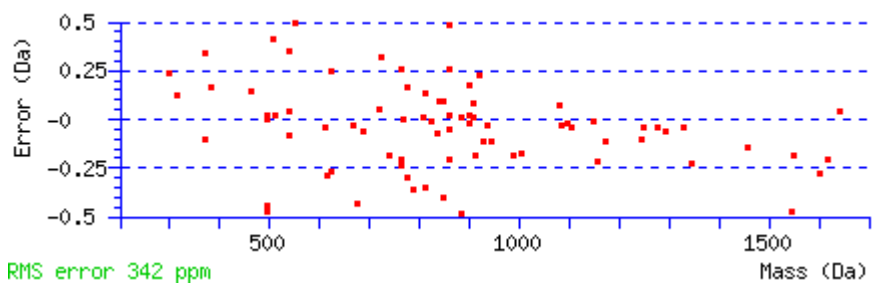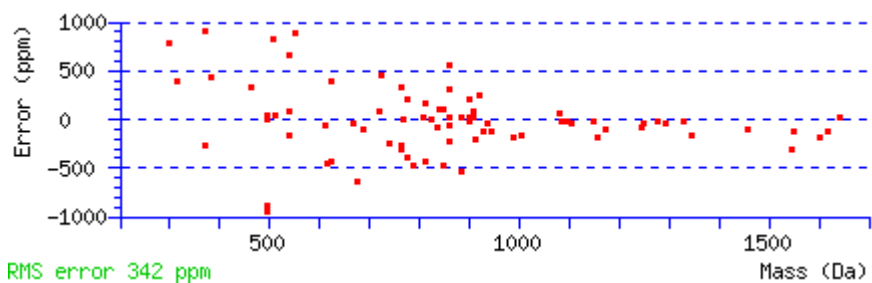

IDENTIFICATION 93

MS/MS Fragmentation of TQPDGTSVPGEPASPISQR

Found in IPI00263048

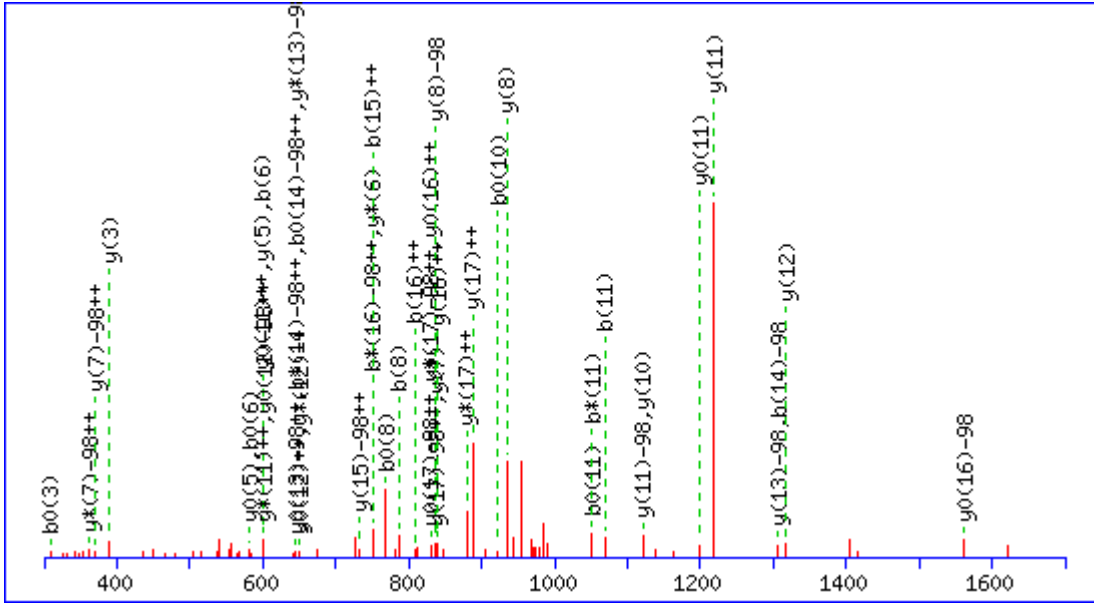

Monoisotopic mass of neutral peptide Mr(calc): 2002.8997

Fixed modifications: Carbamidomethyl (C) (apply to specified residues or termini only)

Variable modifications:

S14 : Phospho (ST), with neutral losses 0.0000(shown in table), 97.9769

Ions Score: 29 Expect: 0.21 (help)

| #  | b         | b <sup>++</sup> | b <sup>*</sup> | b <sup>+++</sup> | b <sup>0</sup> | b <sup>0++</sup> | Seq. | y         | y <sup>++</sup> | y <sup>*</sup> | y <sup>+++</sup> | y <sup>0</sup> | y <sup>0++</sup> | #  |
|----|-----------|-----------------|----------------|------------------|----------------|------------------|------|-----------|-----------------|----------------|------------------|----------------|------------------|----|
| 1  | 102.0550  | 51.5311         |                |                  | 84.0444        | 42.5258          | T    |           |                 |                |                  |                |                  | 19 |
| 2  | 230.1135  | 115.5604        | 213.0870       | 107.0471         | 212.1030       | 106.5551         | Q    | 1902.8593 | 951.9333        | 1885.8328      | 943.4200         | 1884.8487      | 942.9280         | 18 |
| 3  | 327.1663  | 164.0868        | 310.1397       | 155.5735         | 309.1557       | 155.0815         | P    | 1774.8007 | 887.9040        | 1757.7742      | 879.3907         | 1756.7902      | 878.8987         | 17 |
| 4  | 442.1932  | 221.6003        | 425.1667       | 213.0870         | 424.1827       | 212.5950         | D    | 1677.7480 | 839.3776        | 1660.7214      | 830.8643         | 1659.7374      | 830.3723         | 16 |
| 5  | 499.2147  | 250.1110        | 482.1882       | 241.5977         | 481.2041       | 241.1057         | G    | 1562.7210 | 781.8642        | 1545.6945      | 773.3509         | 1544.7105      | 772.8589         | 15 |
| 6  | 600.2624  | 300.6348        | 583.2358       | 292.1216         | 582.2518       | 291.6295         | T    | 1505.6996 | 753.3534        | 1488.6730      | 744.8401         | 1487.6890      | 744.3481         | 14 |
| 7  | 687.2944  | 344.1508        | 670.2679       | 335.6376         | 669.2838       | 335.1456         | S    | 1404.6519 | 702.8296        | 1387.6253      | 694.3163         | 1386.6413      | 693.8243         | 13 |
| 8  | 786.3628  | 393.6851        | 769.3363       | 385.1718         | 768.3523       | 384.6798         | V    | 1317.6199 | 659.3136        | 1300.5933      | 650.8003         | 1299.6093      | 650.3083         | 12 |
| 9  | 883.4156  | 442.2114        | 866.3890       | 433.6982         | 865.4050       | 433.2062         | P    | 1218.5514 | 609.7794        | 1201.5249      | 601.2661         | 1200.5409      | 600.7741         | 11 |
| 10 | 940.4371  | 470.7222        | 923.4105       | 462.2089         | 922.4265       | 461.7169         | G    | 1121.4987 | 561.2530        | 1104.4721      | 552.7397         | 1103.4881      | 552.2477         | 10 |
| 11 | 1069.4796 | 535.2435        | 1052.4531      | 526.7302         | 1051.4691      | 526.2382         | E    | 1064.4772 | 532.7422        | 1047.4507      | 524.2290         | 1046.4667      | 523.7370         | 9  |
| 12 | 1166.5324 | 583.7698        | 1149.5059      | 575.2566         | 1148.5218      | 574.7646         | P    | 935.4346  | 468.2209        | 918.4081       | 459.7077         | 917.4241       | 459.2157         | 8  |
| 13 | 1237.5695 | 619.2884        | 1220.5430      | 610.7751         | 1219.5590      | 610.2831         | A    | 838.3819  | 419.6946        | 821.3553       | 411.1813         | 820.3713       | 410.6893         | 7  |
| 14 | 1404.5679 | 702.7876        | 1387.5413      | 694.2743         | 1386.5573      | 693.7823         | S    | 767.3447  | 384.1760        | 750.3182       | 375.6627         | 749.3342       | 375.1707         | 6  |
| 15 | 1501.6206 | 751.3140        | 1484.5941      | 742.8007         | 1483.6101      | 742.3087         | P    | 600.3464  | 300.6768        | 583.3198       | 292.1636         | 582.3358       | 291.6715         | 5  |
| 16 | 1614.7047 | 807.8560        | 1597.6782      | 799.3427         | 1596.6941      | 798.8507         | I    | 503.2936  | 252.1504        | 486.2671       | 243.6372         | 485.2831       | 243.1452         | 4  |
| 17 | 1701.7367 | 851.3720        | 1684.7102      | 842.8587         | 1683.7262      | 842.3667         | S    | 390.2096  | 195.6084        | 373.1830       | 187.0951         | 372.1990       | 186.6031         | 3  |
| 18 | 1829.7953 | 915.4013        | 1812.7688      | 906.8880         | 1811.7848      | 906.3960         | Q    | 303.1775  | 152.0924        | 286.1510       | 143.5791         |                |                  | 2  |
| 19 |           |                 |                |                  |                |                  | R    | 175.1190  | 88.0631         | 158.0924       | 79.5498          |                |                  | 1  |



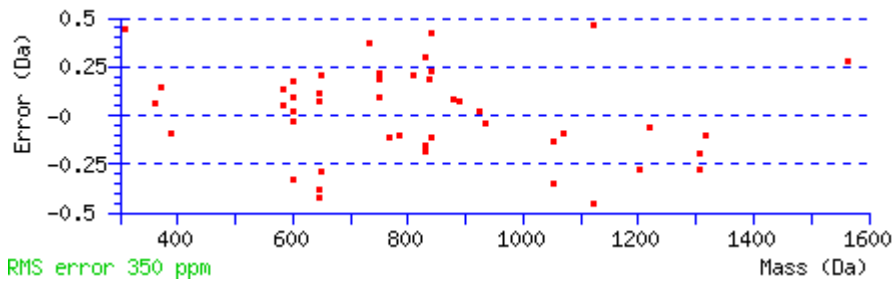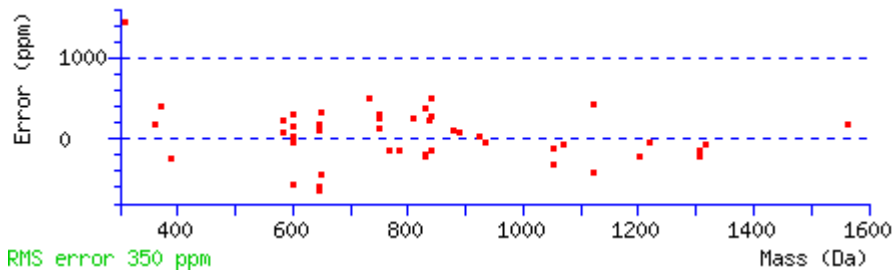



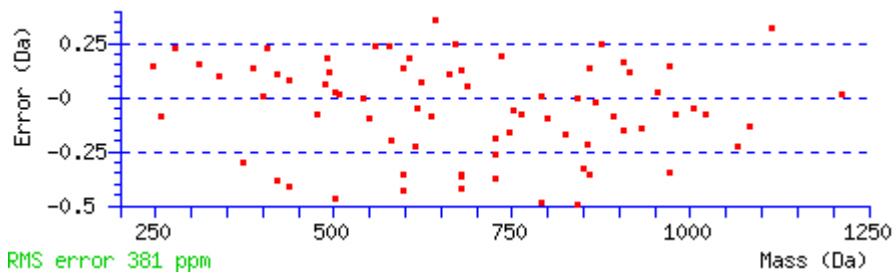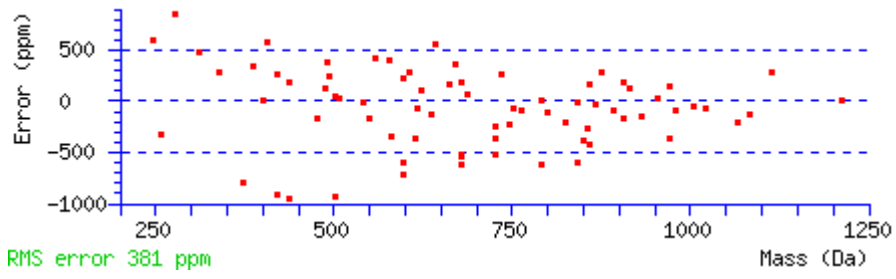

IDENTIFICATION 95

MS/MS Fragmentation of **NMPLSAATLASLGGTSSRR**

Found in **IPI00117277**

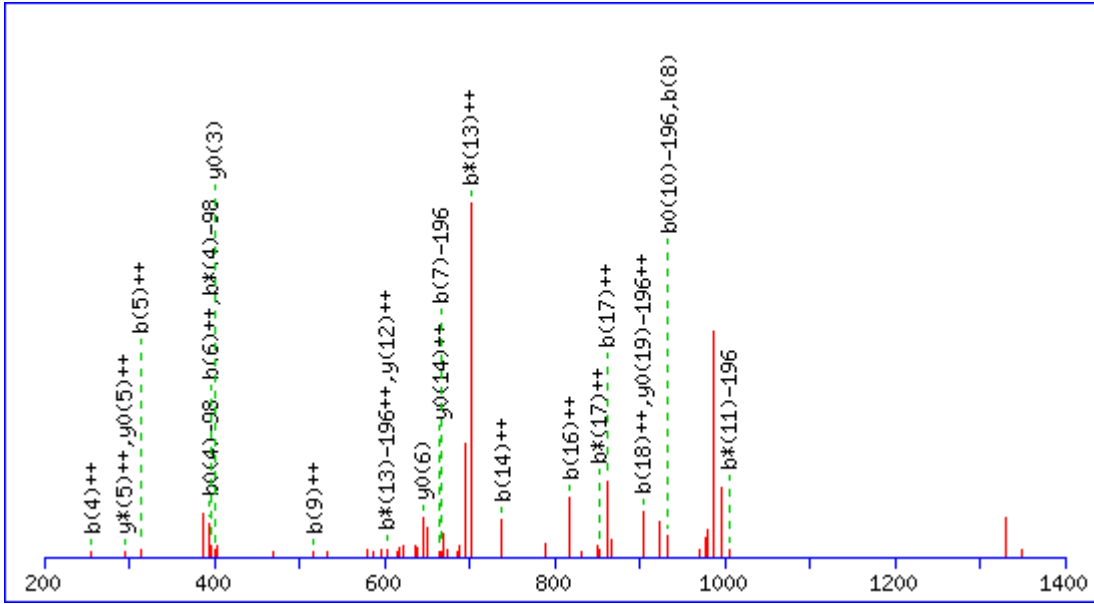

Monoisotopic mass of neutral peptide Mr(calc): 2136.9276

Fixed modifications: Carbamidomethyl (C) (apply to specified residues or termini only)

Variable modifications:

N1 : Deamidated (NQ)

S4 : Phospho (ST), with neutral losses 0.0000(shown in table), 97.9769

S6 : Phospho (ST), with neutral losses 0.0000(shown in table), 97.9769

Ions Score: 25 Expect: 0.57 (help)

| #  | b               | b <sup>++</sup> | b <sup>*</sup> | b <sup>+++</sup> | b <sup>0</sup> | b <sup>0++</sup> | Seq. | y         | y <sup>++</sup> | y <sup>*</sup> | y <sup>+++</sup> | y <sup>0</sup>  | y <sup>0++</sup> | #  |
|----|-----------------|-----------------|----------------|------------------|----------------|------------------|------|-----------|-----------------|----------------|------------------|-----------------|------------------|----|
| 1  | 116.0342        | 58.5207         | 99.0077        | 50.0075          |                |                  | N    |           |                 |                |                  |                 |                  | 20 |
| 2  | 247.0747        | 124.0410        | 230.0482       | 115.5277         |                |                  | M    | 2022.9079 | 1011.9576       | 2005.8814      | 1003.4443        | 2004.8974       | 1002.9523        | 19 |
| 3  | 344.1275        | 172.5674        | 327.1009       | 164.0541         |                |                  | P    | 1891.8674 | 946.4374        | 1874.8409      | 937.9241         | 1873.8569       | 937.4321         | 18 |
| 4  | 511.1258        | <b>256.0666</b> | 494.0993       | 247.5533         | 493.1153       | 247.0613         | S    | 1794.8147 | 897.9110        | 1777.7881      | 889.3977         | 1776.8041       | 888.9057         | 17 |
| 5  | 624.2099        | <b>312.6086</b> | 607.1833       | 304.0953         | 606.1993       | 303.6033         | L    | 1627.8163 | 814.4118        | 1610.7898      | 805.8985         | 1609.8058       | 805.4065         | 16 |
| 6  | 791.2082        | <b>396.1078</b> | 774.1817       | 387.5945         | 773.1977       | 387.1025         | S    | 1514.7323 | 757.8698        | 1497.7057      | 749.3565         | 1496.7217       | 748.8645         | 15 |
| 7  | 862.2454        | 431.6263        | 845.2188       | 423.1130         | 844.2348       | 422.6210         | A    | 1347.7339 | 674.3706        | 1330.7074      | 665.8573         | 1329.7233       | <b>665.3653</b>  | 14 |
| 8  | <b>933.2825</b> | 467.1449        | 916.2559       | 458.6316         | 915.2719       | 458.1396         | A    | 1276.6968 | 638.8520        | 1259.6702      | 630.3388         | 1258.6862       | 629.8468         | 13 |
| 9  | 1034.3302       | <b>517.6687</b> | 1017.3036      | 509.1554         | 1016.3196      | 508.6634         | T    | 1205.6597 | <b>603.3335</b> | 1188.6331      | 594.8202         | 1187.6491       | 594.3282         | 12 |
| 10 | 1147.4142       | 574.2107        | 1130.3877      | 565.6975         | 1129.4037      | 565.2055         | L    | 1104.6120 | 552.8096        | 1087.5854      | 544.2964         | 1086.6014       | 543.8044         | 11 |
| 11 | 1218.4513       | 609.7293        | 1201.4248      | 601.2160         | 1200.4408      | 600.7240         | A    | 991.5279  | 496.2676        | 974.5014       | 487.7543         | 973.5174        | 487.2623         | 10 |
| 12 | 1305.4834       | 653.2453        | 1288.4568      | 644.7320         | 1287.4728      | 644.2400         | S    | 920.4908  | 460.7490        | 903.4643       | 452.2358         | 902.4803        | 451.7438         | 9  |
| 13 | 1418.5674       | 709.7874        | 1401.5409      | <b>701.2741</b>  | 1400.5569      | 700.7821         | L    | 833.4588  | 417.2330        | 816.4322       | 408.7198         | 815.4482        | 408.2278         | 8  |
| 14 | 1475.5889       | <b>738.2981</b> | 1458.5623      | 729.7848         | 1457.5783      | 729.2928         | G    | 720.3747  | 360.6910        | 703.3482       | 352.1777         | 702.3642        | 351.6857         | 7  |
| 15 | 1532.6104       | 766.8088        | 1515.5838      | 758.2955         | 1514.5998      | 757.8035         | G    | 663.3533  | 332.1803        | 646.3267       | 323.6670         | <b>645.3427</b> | 323.1750         | 6  |
| 16 | 1633.6580       | <b>817.3327</b> | 1616.6315      | 808.8194         | 1615.6475      | 808.3274         | T    | 606.3318  | 303.6695        | 589.3052       | <b>295.1563</b>  | 588.3212        | <b>294.6643</b>  | 5  |
| 17 | 1720.6901       | <b>860.8487</b> | 1703.6635      | <b>852.3354</b>  | 1702.6795      | 851.8434         | S    | 505.2841  | 253.1457        | 488.2576       | 244.6324         | 487.2736        | 244.1404         | 4  |
| 18 | 1807.7221       | <b>904.3647</b> | 1790.6955      | 895.8514         | 1789.7115      | 895.3594         | S    | 418.2521  | 209.6297        | 401.2255       | 201.1164         | <b>400.2415</b> | 200.6244         | 3  |
| 19 | 1963.8232       | 982.4152        | 1946.7967      | 973.9020         | 1945.8126      | 973.4100         | R    | 331.2201  | 166.1137        | 314.1935       | 157.6004         |                 |                  | 2  |
| 20 |                 |                 |                |                  |                |                  | R    | 175.1190  | 88.0631         | 158.0924       | 79.5498          |                 |                  | 1  |

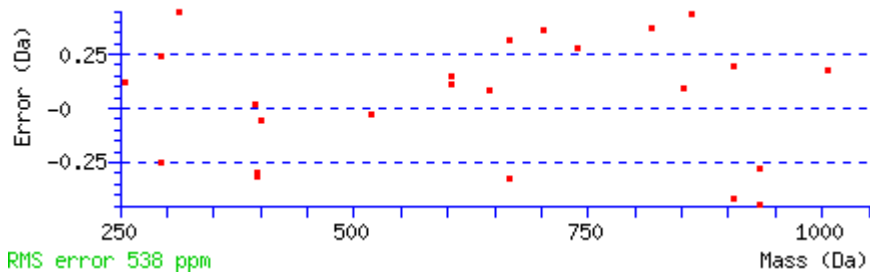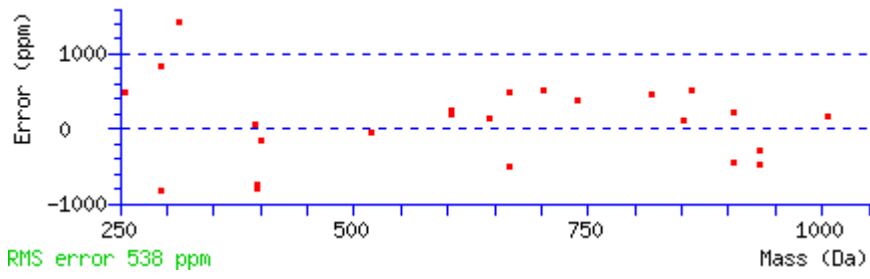

IDENTIFICATION 96

MS/MS Fragmentation of SETAPAETAAPVVEKSPA

Found in IPI00230133

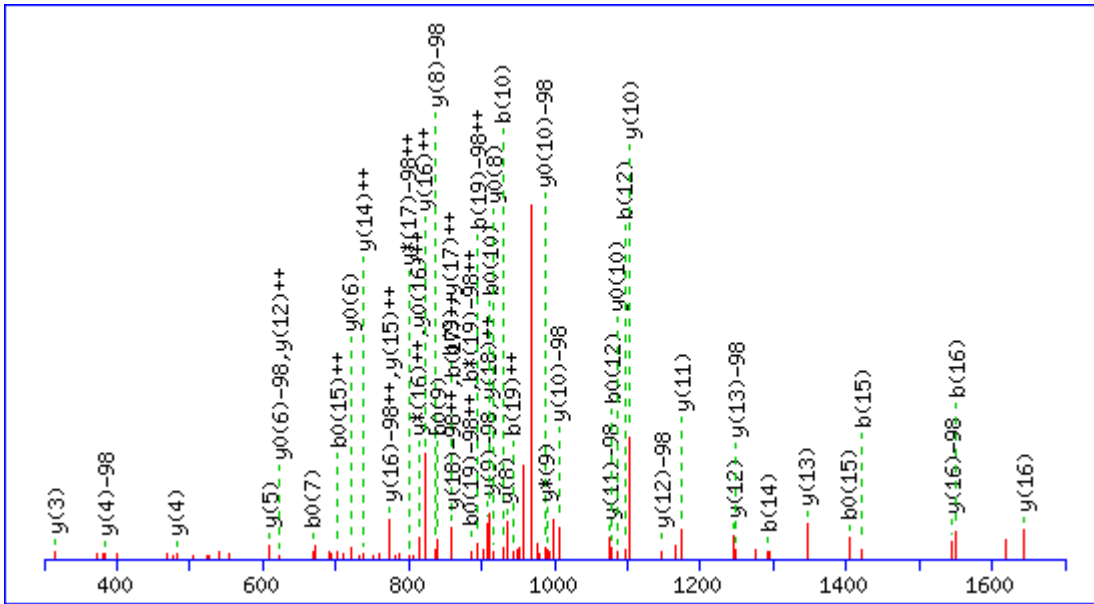

Monoisotopic mass of neutral peptide Mr(calc): 2030.9561

Fixed modifications: Carbamidomethyl (C) (apply to specified residues or termini only)

Variable modifications:

S17 : Phospho (ST), with neutral losses 0.0000(shown in table), 97.9769

Ions Score: 63 Expect: 7.7e-05 (help)

| #  | b         | b <sup>++</sup> | b <sup>*</sup> | b <sup>+++</sup> | b <sup>0</sup> | b <sup>0++</sup> | Seq. | y         | y <sup>++</sup> | y <sup>*</sup> | y <sup>+++</sup> | y <sup>0</sup> | y <sup>0++</sup> | #  |
|----|-----------|-----------------|----------------|------------------|----------------|------------------|------|-----------|-----------------|----------------|------------------|----------------|------------------|----|
| 1  | 88.0393   | 44.5233         |                |                  | 70.0287        | 35.5180          | S    |           |                 |                |                  |                |                  | 20 |
| 2  | 217.0819  | 109.0446        |                |                  | 199.0713       | 100.0393         | E    | 1944.9314 | 972.9693        | 1927.9049      | 964.4561         | 1926.9209      | 963.9641         | 19 |
| 3  | 318.1296  | 159.5684        |                |                  | 300.1190       | 150.5631         | T    | 1815.8888 | 908.4481        | 1798.8623      | 899.9348         | 1797.8783      | 899.4428         | 18 |
| 4  | 389.1667  | 195.0870        |                |                  | 371.1561       | 186.0817         | A    | 1714.8411 | 857.9242        | 1697.8146      | 849.4109         | 1696.8306      | 848.9189         | 17 |
| 5  | 486.2195  | 243.6134        |                |                  | 468.2089       | 234.6081         | P    | 1643.8040 | 822.4057        | 1626.7775      | 813.8924         | 1625.7935      | 813.4004         | 16 |
| 6  | 557.2566  | 279.1319        |                |                  | 539.2460       | 270.1266         | A    | 1546.7513 | 773.8793        | 1529.7247      | 765.3660         | 1528.7407      | 764.8740         | 15 |
| 7  | 686.2992  | 343.6532        |                |                  | 668.2886       | 334.6479         | E    | 1475.7142 | 738.3607        | 1458.6876      | 729.8474         | 1457.7036      | 729.3554         | 14 |
| 8  | 787.3468  | 394.1771        |                |                  | 769.3363       | 385.1718         | T    | 1346.6716 | 673.8394        | 1329.6450      | 665.3261         | 1328.6610      | 664.8341         | 13 |
| 9  | 858.3840  | 429.6956        |                |                  | 840.3734       | 420.6903         | A    | 1245.6239 | 623.3156        | 1228.5973      | 614.8023         | 1227.6133      | 614.3103         | 12 |
| 10 | 929.4211  | 465.2142        |                |                  | 911.4105       | 456.2089         | A    | 1174.5868 | 587.7970        | 1157.5602      | 579.2837         | 1156.5762      | 578.7917         | 11 |
| 11 | 1026.4738 | 513.7406        |                |                  | 1008.4633      | 504.7353         | P    | 1103.5497 | 552.2785        | 1086.5231      | 543.7652         | 1085.5391      | 543.2732         | 10 |
| 12 | 1097.5109 | 549.2591        |                |                  | 1079.5004      | 540.2538         | A    | 1006.4969 | 503.7521        | 989.4703       | 495.2388         | 988.4863       | 494.7468         | 9  |
| 13 | 1194.5637 | 597.7855        |                |                  | 1176.5531      | 588.7802         | P    | 935.4598  | 468.2335        | 918.4332       | 459.7203         | 917.4492       | 459.2282         | 8  |
| 14 | 1293.6321 | 647.3197        |                |                  | 1275.6216      | 638.3144         | V    | 838.4070  | 419.7071        | 821.3805       | 411.1939         | 820.3964       | 410.7019         | 7  |
| 15 | 1422.6747 | 711.8410        |                |                  | 1404.6642      | 702.8357         | E    | 739.3386  | 370.1729        | 722.3120       | 361.6597         | 721.3280       | 361.1677         | 6  |
| 16 | 1550.7697 | 775.8885        | 1533.7431      | 767.3752         | 1532.7591      | 766.8832         | K    | 610.2960  | 305.6516        | 593.2695       | 297.1384         | 592.2854       | 296.6464         | 5  |
| 17 | 1717.7680 | 859.3877        | 1700.7415      | 850.8744         | 1699.7575      | 850.3824         | S    | 482.2010  | 241.6042        | 465.1745       | 233.0909         | 464.1905       | 232.5989         | 4  |
| 18 | 1814.8208 | 907.9140        | 1797.7943      | 899.4008         | 1796.8102      | 898.9088         | P    | 315.2027  | 158.1050        | 298.1761       | 149.5917         |                |                  | 3  |
| 19 | 1885.8579 | 943.4326        | 1868.8314      | 934.9193         | 1867.8474      | 934.4273         | A    | 218.1499  | 109.5786        | 201.1234       | 101.0653         |                |                  | 2  |
| 20 |           |                 |                |                  |                |                  | K    | 147.1128  | 74.0600         | 130.0863       | 65.5468          |                |                  | 1  |

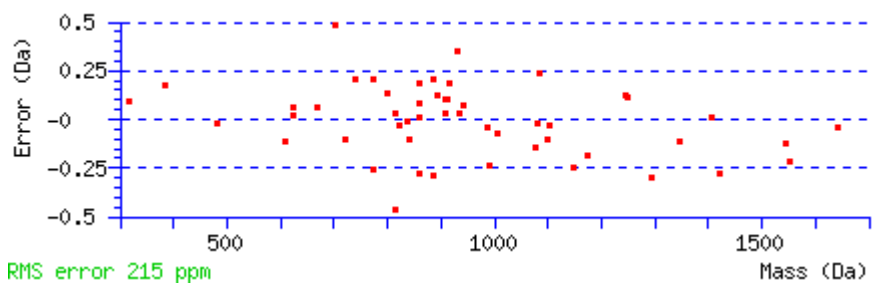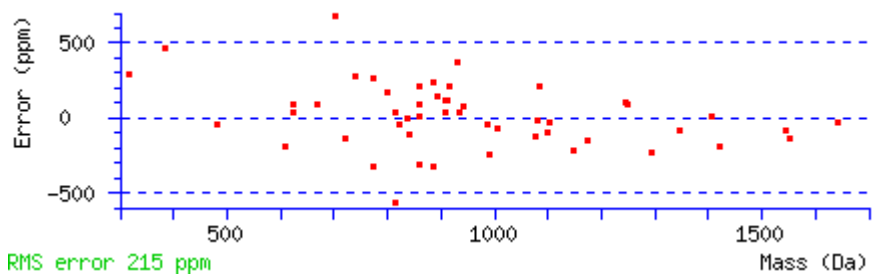

IDENTIFICATION 97

MS/MS Fragmentation of **ASLAHLLDMMK**

Found in

**IPI00137400**

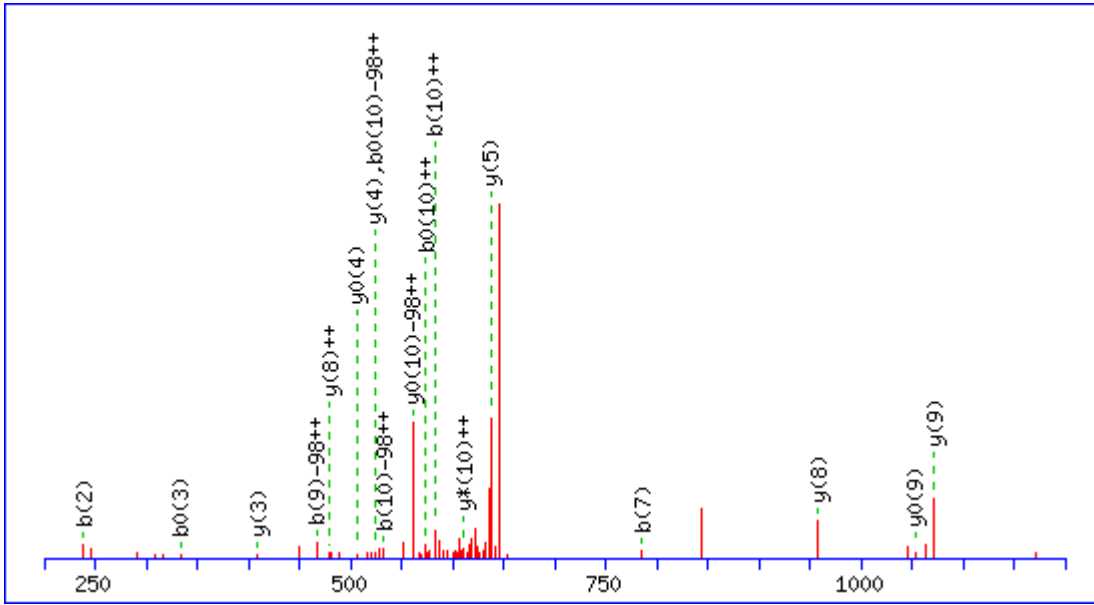

Monoisotopic mass of neutral peptide  $M_r(\text{calc})$ : 1308.5971

Fixed modifications: Carbamidomethyl (C) (apply to specified residues or termini only)

Variable modifications:

S2 : Phospho (ST), with neutral losses 0.0000(shown in table), 97.9769

Ions Score: 26 Expect: 0.26 (help)

| #  | b               | b <sup>++</sup> | b <sup>0</sup>  | b <sup>0++</sup> | Seq. | y                | y <sup>++</sup> | y <sup>*</sup> | y <sup>+++</sup> | y <sup>0</sup>   | y <sup>0++</sup> | #  |
|----|-----------------|-----------------|-----------------|------------------|------|------------------|-----------------|----------------|------------------|------------------|------------------|----|
| 1  | 72.0444         | 36.5258         |                 |                  | A    |                  |                 |                |                  |                  |                  | 11 |
| 2  | <b>239.0427</b> | 120.0250        | 221.0322        | 111.0197         | S    | 1238.5673        | 619.7873        | 1221.5407      | <b>611.2740</b>  | 1220.5567        | 610.7820         | 10 |
| 3  | 352.1268        | 176.5670        | <b>334.1162</b> | 167.5618         | L    | <b>1071.5689</b> | 536.2881        | 1054.5424      | 527.7748         | <b>1053.5584</b> | 527.2828         | 9  |
| 4  | 423.1639        | 212.0856        | 405.1534        | 203.0803         | A    | <b>958.4849</b>  | <b>479.7461</b> | 941.4583       | 471.2328         | 940.4743         | 470.7408         | 8  |
| 5  | 560.2228        | 280.6151        | 542.2123        | 271.6098         | H    | 887.4478         | 444.2275        | 870.4212       | 435.7142         | 869.4372         | 435.2222         | 7  |
| 6  | 673.3069        | 337.1571        | 655.2963        | 328.1518         | L    | 750.3888         | 375.6981        | 733.3623       | 367.1848         | 732.3783         | 366.6928         | 6  |
| 7  | <b>786.3910</b> | 393.6991        | 768.3804        | 384.6938         | L    | <b>637.3048</b>  | 319.1560        | 620.2782       | 310.6428         | 619.2942         | 310.1507         | 5  |
| 8  | 901.4179        | 451.2126        | 883.4073        | 442.2073         | D    | <b>524.2207</b>  | 262.6140        | 507.1942       | 254.1007         | <b>506.2102</b>  | 253.6087         | 4  |
| 9  | 1032.4584       | 516.7328        | 1014.4478       | 507.7276         | M    | <b>409.1938</b>  | 205.1005        | 392.1672       | 196.5873         |                  |                  | 3  |
| 10 | 1163.4989       | <b>582.2531</b> | 1145.4883       | <b>573.2478</b>  | M    | 278.1533         | 139.5803        | 261.1267       | 131.0670         |                  |                  | 2  |
| 11 |                 |                 |                 |                  | K    | 147.1128         | 74.0600         | 130.0863       | 65.5468          |                  |                  | 1  |

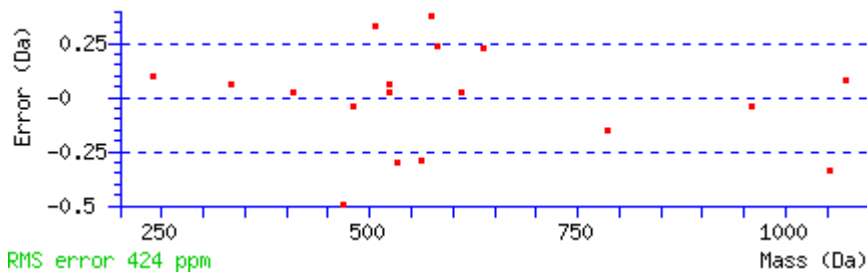

RMS error 424 ppm

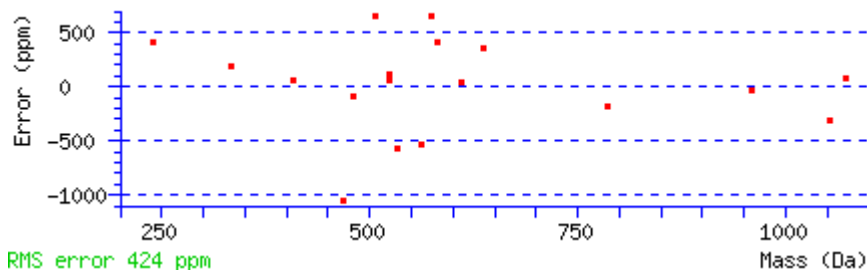

RMS error 424 ppm



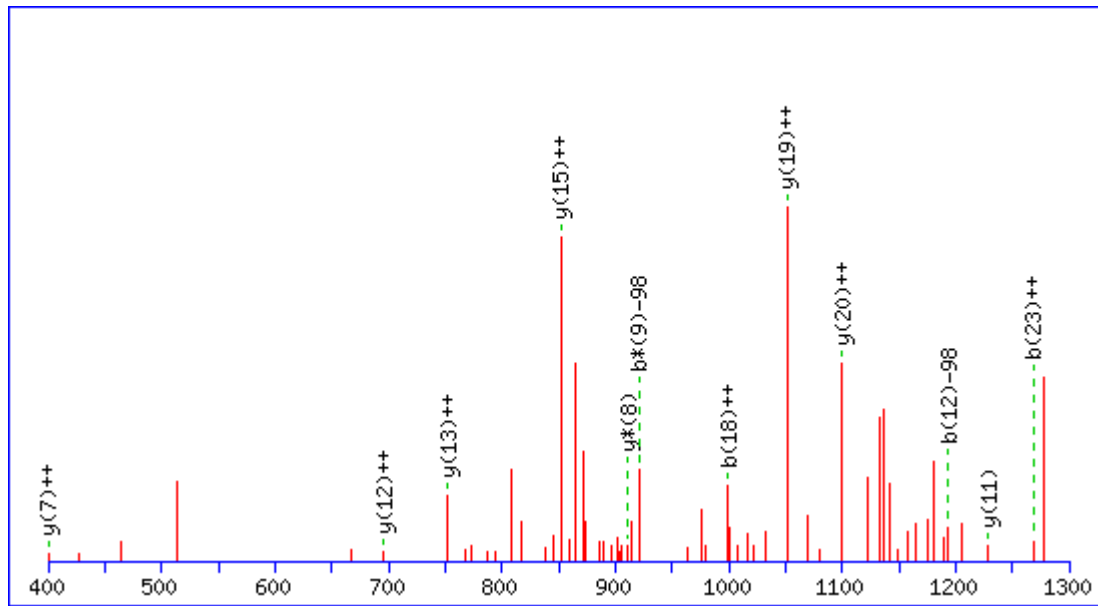

Monoisotopic mass of neutral peptide Mr(calc): 2794.4153

Fixed modifications: Carbamidomethyl (C) (apply to specified residues or termini only)

Variable modifications:

T1 : Phospho (ST), with neutral losses 0.0000(shown in table), 97.9769

Q18 : Deamidated (NQ)

Ions Score: 20 Expect: 0.9 (help)

| #  | b         | b <sup>++</sup> | b <sup>*</sup> | b <sup>+++</sup> | b <sup>0</sup> | b <sup>0++</sup> | Seq. | y         | y <sup>++</sup> | y <sup>*</sup> | y <sup>+++</sup> | y <sup>0</sup> | y <sub>0++</sub> | #  |
|----|-----------|-----------------|----------------|------------------|----------------|------------------|------|-----------|-----------------|----------------|------------------|----------------|------------------|----|
| 1  | 182.0213  | 91.5143         |                |                  | 164.0107       | 82.5090          | T    |           |                 |                |                  |                |                  | 25 |
| 2  | 239.0427  | 120.0250        |                |                  | 221.0322       | 111.0197         | G    | 2614.4087 | 1307.7080       | 2597.3821      | 1299.1947        | 2596.3981      | 1298.7027        | 24 |
| 3  | 354.0697  | 177.5385        |                |                  | 336.0591       | 168.5332         | D    | 2557.3872 | 1279.1972       | 2540.3606      | 1270.6840        | 2539.3766      | 1270.1920        | 23 |
| 4  | 483.1123  | 242.0598        |                |                  | 465.1017       | 233.0545         | E    | 2442.3603 | 1221.6838       | 2425.3337      | 1213.1705        | 2424.3497      | 1212.6785        | 22 |
| 5  | 596.1964  | 298.6018        |                |                  | 578.1858       | 289.5965         | L    | 2313.3177 | 1157.1625       | 2296.2911      | 1148.6492        | 2295.3071      | 1148.1572        | 21 |
| 6  | 695.2648  | 348.1360        |                |                  | 677.2542       | 339.1307         | V    | 2200.2336 | 1100.6204       | 2183.2070      | 1092.1072        | 2182.2230      | 1091.6152        | 20 |
| 7  | 809.3077  | 405.1575        | 792.2811       | 396.6442         | 791.2971       | 396.1522         | N    | 2101.1652 | 1051.0862       | 2084.1386      | 1042.5730        | 2083.1546      | 1042.0809        | 19 |
| 8  | 922.3918  | 461.6995        | 905.3652       | 453.1862         | 904.3812       | 452.6942         | I    | 1987.1223 | 994.0648        | 1970.0957      | 985.5515         | 1969.1117      | 985.0595         | 18 |
| 9  | 1036.4347 | 518.7210        | 1019.4081      | 510.2077         | 1018.4241      | 509.7157         | N    | 1874.0382 | 937.5227        | 1857.0116      | 929.0095         | 1856.0276      | 928.5175         | 17 |
| 10 | 1093.4561 | 547.2317        | 1076.4296      | 538.7184         | 1075.4456      | 538.2264         | G    | 1759.9953 | 880.5013        | 1742.9687      | 871.9880         | 1741.9847      | 871.4960         | 16 |
| 11 | 1194.5038 | 597.7556        | 1177.4773      | 589.2423         | 1176.4933      | 588.7503         | T    | 1702.9738 | 851.9905        | 1685.9473      | 843.4773         | 1684.9632      | 842.9853         | 15 |
| 12 | 1291.5566 | 646.2819        | 1274.5300      | 637.7687         | 1273.5460      | 637.2767         | P    | 1601.9261 | 801.4667        | 1584.8996      | 792.9534         | 1583.9156      | 792.4614         | 14 |
| 13 | 1404.6407 | 702.8240        | 1387.6141      | 694.3107         | 1386.6301      | 693.8187         | L    | 1504.8734 | 752.9403        | 1487.8468      | 744.4270         | 1486.8628      | 743.9350         | 13 |
| 14 | 1567.7040 | 784.3556        | 1550.6774      | 775.8424         | 1549.6934      | 775.3503         | Y    | 1391.7893 | 696.3983        | 1374.7627      | 687.8850         | 1373.7787      | 687.3930         | 12 |
| 15 | 1624.7254 | 812.8664        | 1607.6989      | 804.3531         | 1606.7149      | 803.8611         | G    | 1228.7260 | 614.8666        | 1211.6994      | 606.3533         | 1210.7154      | 605.8613         | 11 |
| 16 | 1711.7575 | 856.3824        | 1694.7309      | 847.8691         | 1693.7469      | 847.3771         | S    | 1171.7045 | 586.3559        | 1154.6780      | 577.8426         | 1153.6939      | 577.3506         | 10 |
| 17 | 1867.8586 | 934.4329        | 1850.8320      | 925.9197         | 1849.8480      | 925.4276         | R    | 1084.6725 | 542.8399        | 1067.6459      | 534.3266         | 1066.6619      | 533.8346         | 9  |
| 18 | 1996.9012 | 998.9542        | 1979.8746      | 990.4410         | 1978.8906      | 989.9489         | Q    | 928.5714  | 464.7893        | 911.5448       | 456.2760         | 910.5608       | 455.7840         | 8  |
| 19 | 2125.9438 | 1063.4755       | 2108.9172      | 1054.9622        | 2107.9332      | 1054.4702        | E    | 799.5288  | 400.2680        | 782.5022       | 391.7547         | 781.5182       | 391.2627         | 7  |
| 20 | 2196.9809 | 1098.9941       | 2179.9543      | 1090.4808        | 2178.9703      | 1089.9888        | A    | 670.4862  | 335.7467        | 653.4596       | 327.2335         |                |                  | 6  |
| 21 | 2310.0649 | 1155.5361       | 2293.0384      | 1147.0228        | 2292.0544      | 1146.5308        | L    | 599.4491  | 300.2282        | 582.4225       | 291.7149         |                |                  | 5  |
| 22 | 2423.1490 | 1212.0781       | 2406.1225      | 1203.5649        | 2405.1384      | 1203.0729        | I    | 486.3650  | 243.6861        | 469.3384       | 235.1729         |                |                  | 4  |
| 23 | 2536.2331 | 1268.6202       | 2519.2065      | 1260.1069        | 2518.2225      | 1259.6149        | L    | 373.2809  | 187.1441        | 356.2544       | 178.6308         |                |                  | 3  |
| 24 | 2649.3171 | 1325.1622       | 2632.2906      | 1316.6489        | 2631.3066      | 1316.1569        | I    | 260.1969  | 130.6021        | 243.1703       | 122.0888         |                |                  | 2  |
| 25 |           |                 |                |                  |                |                  | K    | 147.1128  | 74.0600         | 130.0863       | 65.5468          |                |                  | 1  |

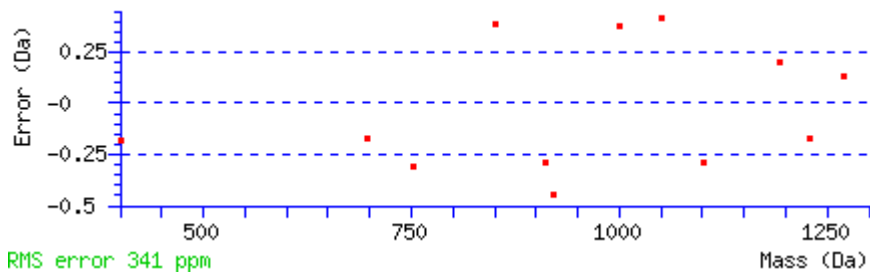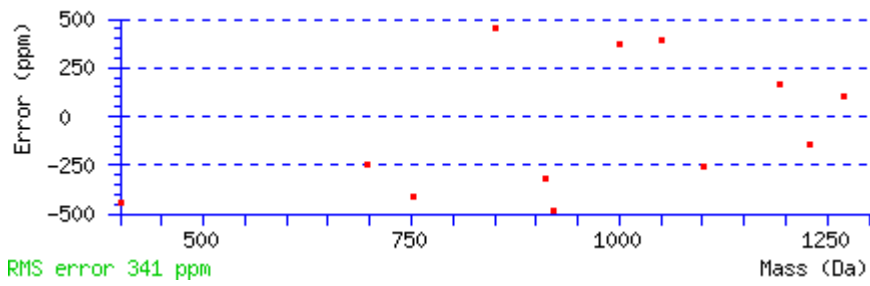

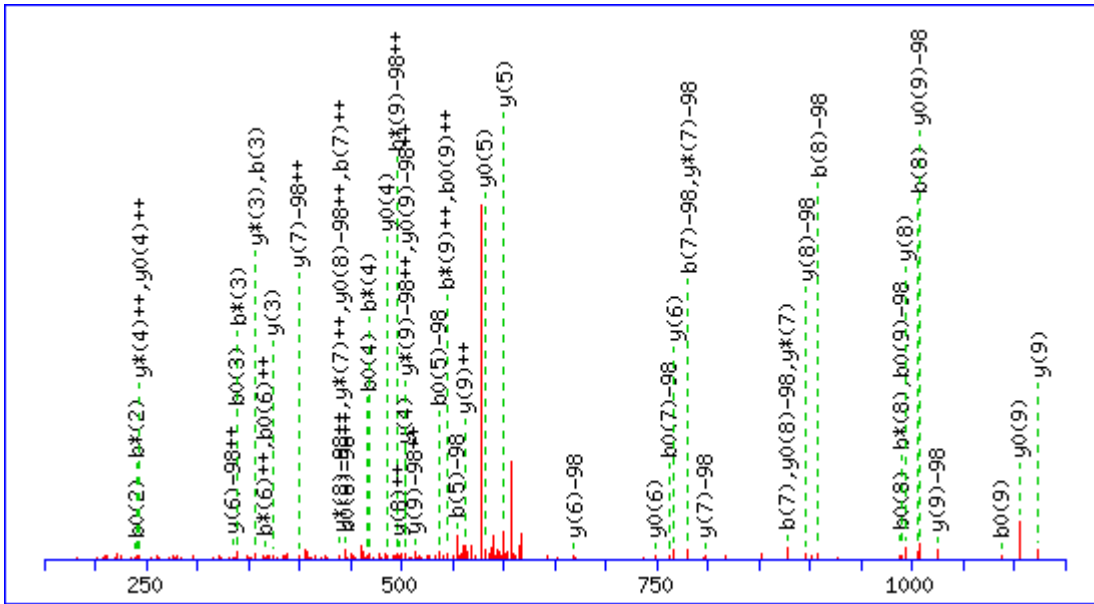

Monoisotopic mass of neutral peptide Mr(calc): 1250.5908 Fixed modifications: Carbamidomethyl (C) (apply to specified residues or termini only) Variable modifications: S5 : Phospho (ST), with neutral losses 97.9769 (shown in table), 0.0000 Ions Score: 26 Expect: 0.26 (help)

| #  | b         | b <sup>++</sup> | b <sup>*</sup> | b <sup>+++</sup> | b <sup>0</sup> | b <sup>0++</sup> | Seq. | y         | y <sup>++</sup> | y <sup>*</sup> | y <sup>+++</sup> | y <sup>0</sup> | y <sup>0++</sup> | #  |
|----|-----------|-----------------|----------------|------------------|----------------|------------------|------|-----------|-----------------|----------------|------------------|----------------|------------------|----|
| 1  | 129.1022  | 65.0548         | 112.0757       | 56.5415          |                |                  | K    |           |                 |                |                  |                |                  | 10 |
| 2  | 258.1448  | 129.5761        | 241.1183       | 121.0628         | 240.1343       | 120.5708         | E    | 1025.5262 | 513.2667        | 1008.4997      | 504.7535         | 1007.5156      | 504.2615         | 9  |
| 3  | 357.2132  | 179.1103        | 340.1867       | 170.5970         | 339.2027       | 170.1050         | V    | 896.4836  | 448.7454        | 879.4571       | 440.2322         | 878.4730       | 439.7402         | 8  |
| 4  | 485.2718  | 243.1396        | 468.2453       | 234.6263         | 467.2613       | 234.1343         | Q    | 797.4152  | 399.2112        | 780.3886       | 390.6980         | 779.4046       | 390.2060         | 7  |
| 5  | 554.2933  | 277.6503        | 537.2667       | 269.1370         | 536.2827       | 268.6450         | S    | 669.3566  | 335.1819        | 652.3301       | 326.6687         | 651.3461       | 326.1767         | 6  |
| 6  | 651.3461  | 326.1767        | 634.3195       | 317.6634         | 633.3355       | 317.1714         | P    | 600.3352  | 300.6712        | 583.3086       | 292.1579         | 582.3246       | 291.6659         | 5  |
| 7  | 780.3886  | 390.6980        | 763.3621       | 382.1847         | 762.3781       | 381.6927         | E    | 503.2824  | 252.1448        | 486.2558       | 243.6316         | 485.2718       | 243.1396         | 4  |
| 8  | 908.4472  | 454.7272        | 891.4207       | 446.2140         | 890.4367       | 445.7220         | Q    | 374.2398  | 187.6235        | 357.2132       | 179.1103         |                |                  | 3  |
| 9  | 1007.5156 | 504.2615        | 990.4891       | 495.7482         | 989.5051       | 495.2562         | V    | 246.1812  | 123.5942        | 229.1547       | 115.0810         |                |                  | 2  |
| 10 |           |                 |                |                  |                |                  | K    | 147.1128  | 74.0600         | 130.0863       | 65.5468          |                |                  | 1  |

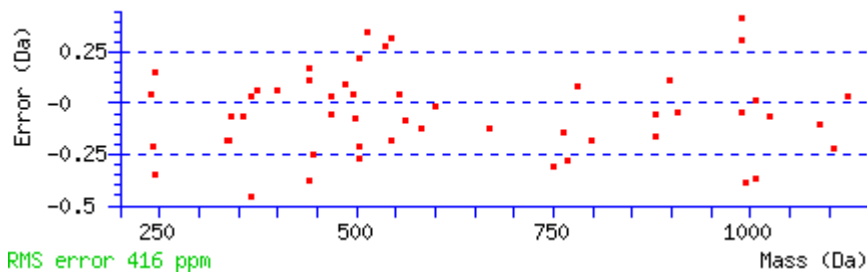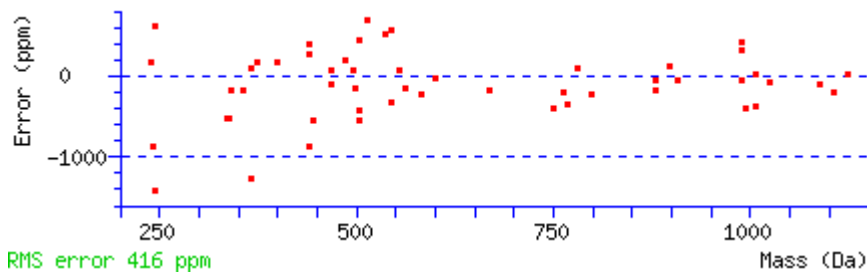

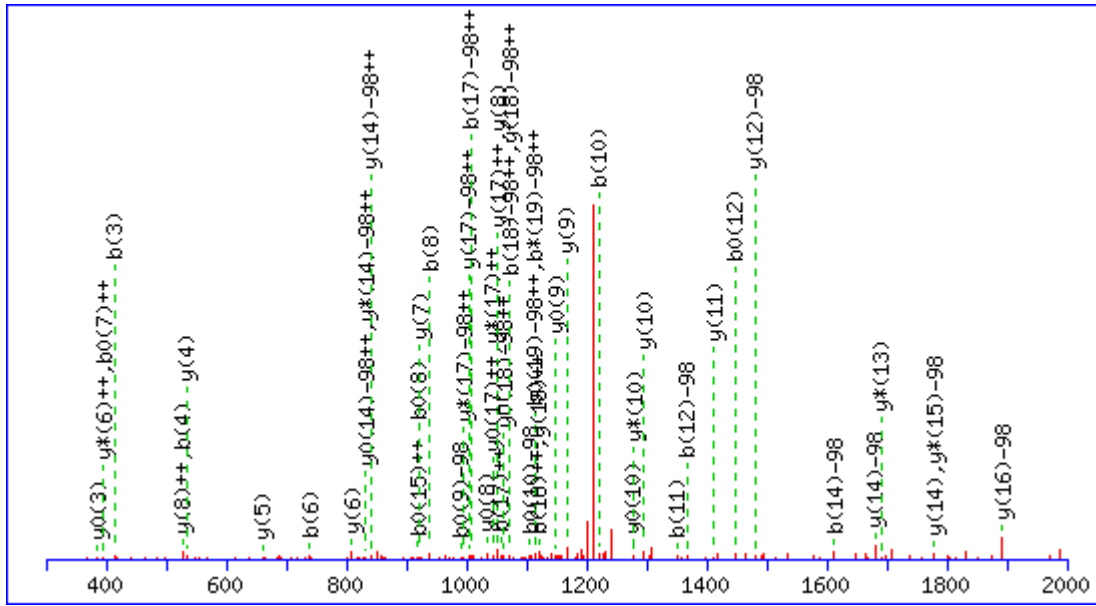

Monoisotopic mass of neutral peptide Mr(calc): 2516.0380 Fixed modifications: Carbamidomethyl (C) (apply to specified residues or termini only) Variable modifications: S9 : Phospho (ST), with neutral losses 97.9769 (shown in table), 0.0000 Ions Score: 39 Expect: 0.026 (help)

| #  | b         | b <sup>++</sup> | b <sup>*</sup> | b <sup>+++</sup> | b <sup>0</sup> | b <sup>0++</sup> | Seq. | y         | y <sup>++</sup> | y <sup>*</sup> | y <sup>+++</sup> | y <sup>0</sup> | y <sup>0++</sup> | #  |
|----|-----------|-----------------|----------------|------------------|----------------|------------------|------|-----------|-----------------|----------------|------------------|----------------|------------------|----|
| 1  | 114.0913  | 57.5493         |                |                  |                |                  | I    |           |                 |                |                  |                |                  | 20 |
| 2  | 277.1547  | 139.0810        |                |                  |                |                  | Y    | 2305.9844 | 1153.4958       | 2288.9578      | 1144.9826        | 2287.9738      | 1144.4905        | 19 |
| 3  | 414.2136  | 207.6104        |                |                  |                |                  | H    | 2142.9210 | 1071.9642       | 2125.8945      | 1063.4509        | 2124.9105      | 1062.9589        | 18 |
| 4  | 527.2976  | 264.1525        |                |                  |                |                  | L    | 2005.8621 | 1003.4347       | 1988.8356      | 994.9214         | 1987.8516      | 994.4294         | 17 |
| 5  | 624.3504  | 312.6788        |                |                  |                |                  | P    | 1892.7781 | 946.8927        | 1875.7515      | 938.3794         | 1874.7675      | 937.8874         | 16 |
| 6  | 739.3774  | 370.1923        |                |                  | 721.3668       | 361.1870         | D    | 1795.7253 | 898.3663        | 1778.6988      | 889.8530         | 1777.7147      | 889.3610         | 15 |
| 7  | 810.4145  | 405.7109        |                |                  | 792.4039       | 396.7056         | A    | 1680.6984 | 840.8528        | 1663.6718      | 832.3395         | 1662.6878      | 831.8475         | 14 |
| 8  | 939.4571  | 470.2322        |                |                  | 921.4465       | 461.2269         | E    | 1609.6613 | 805.3343        | 1592.6347      | 796.8210         | 1591.6507      | 796.3290         | 13 |
| 9  | 1008.4785 | 504.7429        |                |                  | 990.4680       | 495.7376         | S    | 1480.6187 | 740.8130        | 1463.5921      | 732.2997         | 1462.6081      | 731.8077         | 12 |
| 10 | 1123.5055 | 562.2564        |                |                  | 1105.4949      | 553.2511         | D    | 1411.5972 | 706.3022        | 1394.5706      | 697.7890         | 1393.5866      | 697.2970         | 11 |
| 11 | 1252.5481 | 626.7777        |                |                  | 1234.5375      | 617.7724         | E    | 1296.5703 | 648.7888        | 1279.5437      | 640.2755         | 1278.5597      | 639.7835         | 10 |
| 12 | 1367.5750 | 684.2911        |                |                  | 1349.5644      | 675.2859         | D    | 1167.5277 | 584.2675        | 1150.5011      | 575.7542         | 1149.5171      | 575.2622         | 9  |
| 13 | 1496.6176 | 748.8124        |                |                  | 1478.6070      | 739.8072         | E    | 1052.5007 | 526.7540        | 1035.4742      | 518.2407         | 1034.4902      | 517.7487         | 8  |
| 14 | 1611.6445 | 806.3259        |                |                  | 1593.6340      | 797.3206         | D    | 923.4581  | 462.2327        | 906.4316       | 453.7194         | 905.4476       | 453.2274         | 7  |
| 15 | 1758.7130 | 879.8601        |                |                  | 1740.7024      | 870.8548         | F    | 808.4312  | 404.7192        | 791.4046       | 396.2060         | 790.4206       | 395.7139         | 6  |
| 16 | 1886.8079 | 943.9076        | 1869.7814      | 935.3943         | 1868.7973      | 934.9023         | K    | 661.3628  | 331.1850        | 644.3362       | 322.6717         | 643.3522       | 322.1797         | 5  |
| 17 | 2015.8505 | 1008.4289       | 1998.8240      | 999.9156         | 1997.8399      | 999.4236         | E    | 533.2678  | 267.1375        | 516.2413       | 258.6243         | 515.2572       | 258.1323         | 4  |
| 18 | 2143.9091 | 1072.4582       | 2126.8825      | 1063.9449        | 2125.8985      | 1063.4529        | Q    | 404.2252  | 202.6162        | 387.1987       | 194.1030         | 386.2146       | 193.6110         | 3  |
| 19 | 2244.9568 | 1122.9820       | 2227.9302      | 1114.4687        | 2226.9462      | 1113.9767        | T    | 276.1666  | 138.5870        | 259.1401       | 130.0737         | 258.1561       | 129.5817         | 2  |
| 20 |           |                 |                |                  |                |                  | R    | 175.1190  | 88.0631         | 158.0924       | 79.5498          |                |                  | 1  |

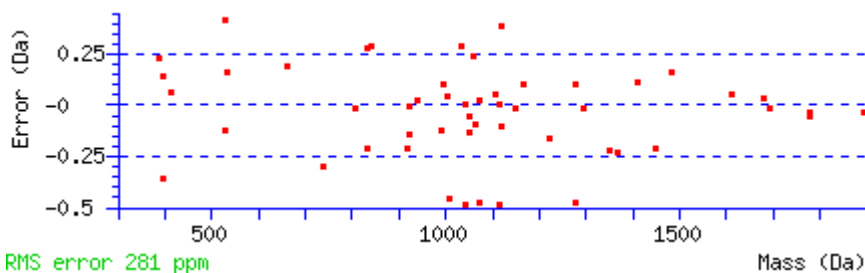

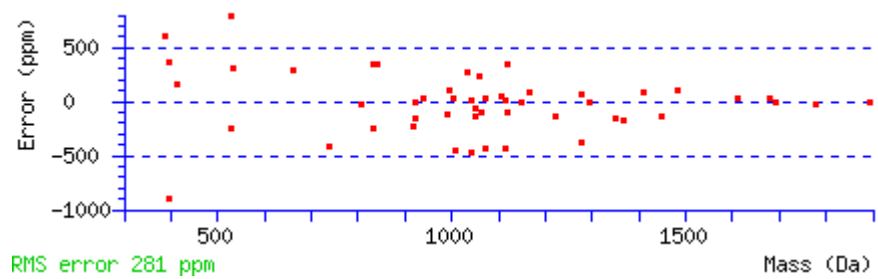

IDENTIFICATION 101

MS/MS Fragmentation of EIITEEPSEEEADMPKPK

Found in IPI00120691

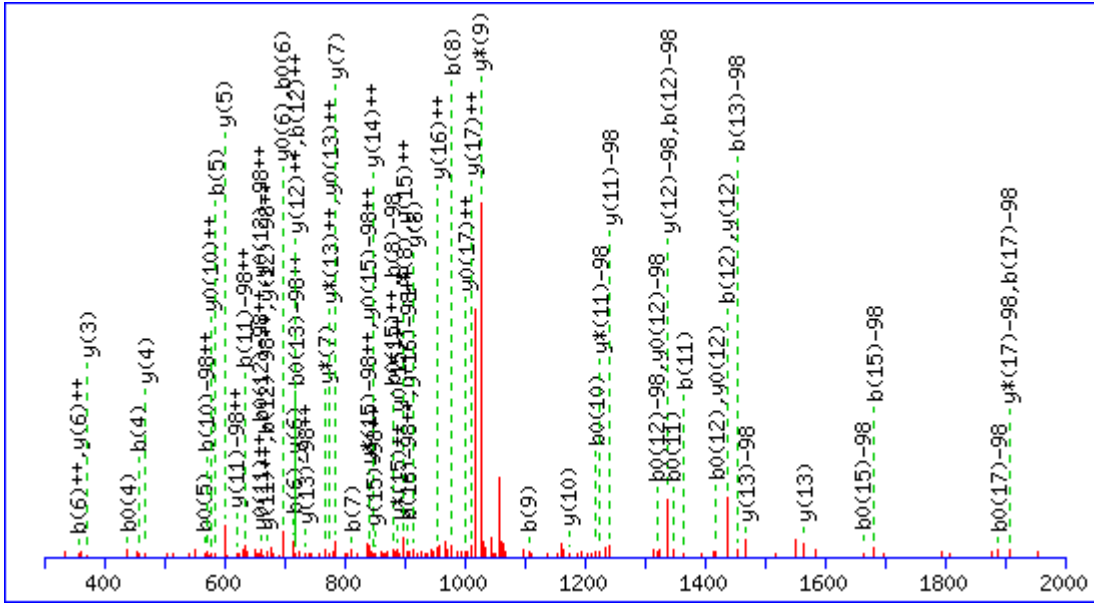

Monoisotopic mass of neutral peptide Mr(calc): 2150.9330 Fixed modifications: Carbamidomethyl (C) (apply to specified residues or termini only) Variable modifications: S8 : Phospho (ST), with neutral losses 97.9769 (shown in table), 0.0000 Ions Score: 40 Expect: 0.019 (help)

| #  | b         | b <sup>++</sup> | b <sup>*</sup> | b <sup>+++</sup> | b <sup>0</sup> | b <sup>0++</sup> | Seq. | y         | y <sup>++</sup> | y <sup>*</sup> | y <sup>*<br/>++</sup> | y <sup>0</sup> | y <sup>0++</sup> | #  |
|----|-----------|-----------------|----------------|------------------|----------------|------------------|------|-----------|-----------------|----------------|-----------------------|----------------|------------------|----|
| 1  | 130.0499  | 65.5286         |                |                  | 112.0393       | 56.5233          | E    |           |                 |                |                       |                |                  | 18 |
| 2  | 243.1339  | 122.0706        |                |                  | 225.1234       | 113.0653         | I    | 1924.9208 | 962.9641        | 1907.8943      | 954.4508              | 1906.9103      | 953.9588         | 17 |
| 3  | 356.2180  | 178.6126        |                |                  | 338.2074       | 169.6074         | I    | 1811.8368 | 906.4220        | 1794.8102      | 897.9087              | 1793.8262      | 897.4167         | 16 |
| 4  | 457.2657  | 229.1365        |                |                  | 439.2551       | 220.1312         | T    | 1698.7527 | 849.8800        | 1681.7262      | 841.3667              | 1680.7421      | 840.8747         | 15 |
| 5  | 586.3083  | 293.6578        |                |                  | 568.2977       | 284.6525         | E    | 1597.7050 | 799.3562        | 1580.6785      | 790.8429              | 1579.6945      | 790.3509         | 14 |
| 6  | 715.3509  | 358.1791        |                |                  | 697.3403       | 349.1738         | E    | 1468.6624 | 734.8349        | 1451.6359      | 726.3216              | 1450.6519      | 725.8296         | 13 |
| 7  | 812.4036  | 406.7055        |                |                  | 794.3931       | 397.7002         | P    | 1339.6198 | 670.3136        | 1322.5933      | 661.8003              | 1321.6093      | 661.3083         | 12 |
| 8  | 881.4251  | 441.2162        |                |                  | 863.4145       | 432.2109         | S    | 1242.5671 | 621.7872        | 1225.5405      | 613.2739              | 1224.5565      | 612.7819         | 11 |
| 9  | 1010.4677 | 505.7375        |                |                  | 992.4571       | 496.7322         | E    | 1173.5456 | 587.2764        | 1156.5191      | 578.7632              | 1155.5351      | 578.2712         | 10 |
| 10 | 1139.5103 | 570.2588        |                |                  | 1121.4997      | 561.2535         | E    | 1044.5030 | 522.7551        | 1027.4765      | 514.2419              | 1026.4925      | 513.7499         | 9  |
| 11 | 1268.5529 | 634.7801        |                |                  | 1250.5423      | 625.7748         | E    | 915.4604  | 458.2339        | 898.4339       | 449.7206              | 897.4499       | 449.2286         | 8  |
| 12 | 1339.5900 | 670.2986        |                |                  | 1321.5794      | 661.2933         | A    | 786.4178  | 393.7126        | 769.3913       | 385.1993              | 768.4073       | 384.7073         | 7  |
| 13 | 1454.6169 | 727.8121        |                |                  | 1436.6064      | 718.8068         | D    | 715.3807  | 358.1940        | 698.3542       | 349.6807              | 697.3702       | 349.1887         | 6  |
| 14 | 1585.6574 | 793.3323        |                |                  | 1567.6468      | 784.3271         | M    | 600.3538  | 300.6805        | 583.3272       | 292.1673              |                |                  | 5  |
| 15 | 1682.7102 | 841.8587        |                |                  | 1664.6996      | 832.8534         | P    | 469.3133  | 235.1603        | 452.2867       | 226.6470              |                |                  | 4  |
| 16 | 1810.8051 | 905.9062        | 1793.7786      | 897.3929         | 1792.7946      | 896.9009         | K    | 372.2605  | 186.6339        | 355.2340       | 178.1206              |                |                  | 3  |
| 17 | 1907.8579 | 954.4326        | 1890.8314      | 945.9193         | 1889.8473      | 945.4273         | P    | 244.1656  | 122.5864        | 227.1390       | 114.0731              |                |                  | 2  |
| 18 |           |                 |                |                  |                |                  | K    | 147.1128  | 74.0600         | 130.0863       | 65.5468               |                |                  | 1  |

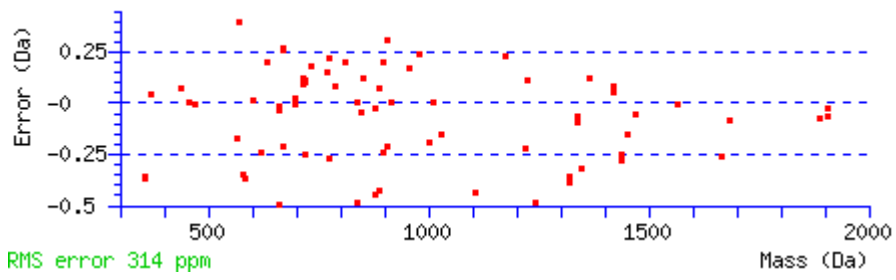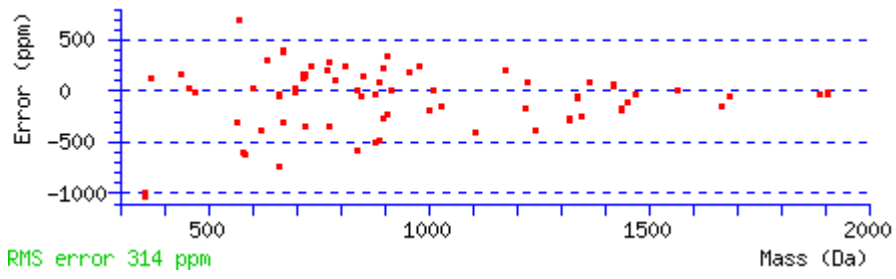

IDENTIFICATION 102

MS/MS Fragmentation of **KLSGDLEAGAPK**

Found in **IPI00115660**

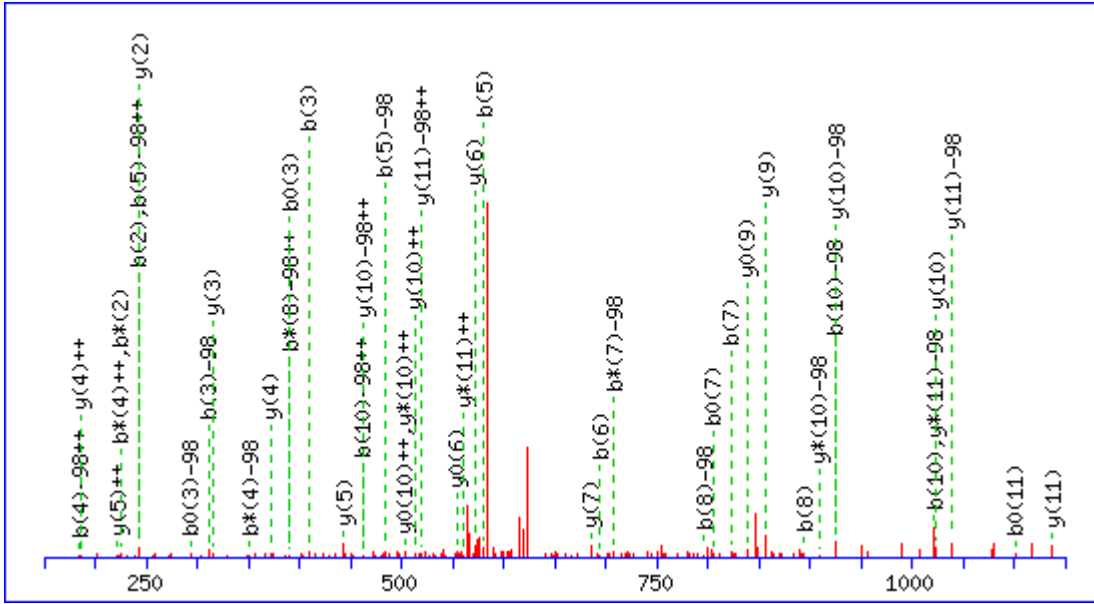

Monoisotopic mass of neutral peptide  $M_r(\text{calc})$ : 1264.6064

Fixed modifications: Carbamidomethyl (C) (apply to specified residues or termini only)

Variable modifications:

S3 : Phospho (ST), with neutral losses 97.9769 (shown in table), 0.0000

Ions Score: 49 Expect: 0.0012 (help)

| #  | b         | b <sup>++</sup> | b <sup>*</sup> | b <sup>+++</sup> | b <sup>0</sup> | b <sup>0++</sup> | Seq. | y         | y <sup>++</sup> | y <sup>*</sup> | y <sup>+++</sup> | y <sup>0</sup> | y <sup>0++</sup> | #  |
|----|-----------|-----------------|----------------|------------------|----------------|------------------|------|-----------|-----------------|----------------|------------------|----------------|------------------|----|
| 1  | 129.1022  | 65.0548         | 112.0757       | 56.5415          |                |                  | K    |           |                 |                |                  |                |                  | 12 |
| 2  | 242.1863  | 121.5968        | 225.1598       | 113.0835         |                |                  | L    | 1039.5419 | 520.2746        | 1022.5153      | 511.7613         | 1021.5313      | 511.2693         | 11 |
| 3  | 311.2078  | 156.1075        | 294.1812       | 147.5942         | 293.1972       | 147.1022         | S    | 926.4578  | 463.7325        | 909.4312       | 455.2193         | 908.4472       | 454.7272         | 10 |
| 4  | 368.2292  | 184.6183        | 351.2027       | 176.1050         | 350.2187       | 175.6130         | G    | 857.4363  | 429.2218        | 840.4098       | 420.7085         | 839.4258       | 420.2165         | 9  |
| 5  | 483.2562  | 242.1317        | 466.2296       | 233.6184         | 465.2456       | 233.1264         | D    | 800.4149  | 400.7111        | 783.3883       | 392.1978         | 782.4043       | 391.7058         | 8  |
| 6  | 596.3402  | 298.6738        | 579.3137       | 290.1605         | 578.3297       | 289.6685         | L    | 685.3879  | 343.1976        | 668.3614       | 334.6843         | 667.3774       | 334.1923         | 7  |
| 7  | 725.3828  | 363.1951        | 708.3563       | 354.6818         | 707.3723       | 354.1898         | E    | 572.3039  | 286.6556        | 555.2773       | 278.1423         | 554.2933       | 277.6503         | 6  |
| 8  | 796.4199  | 398.7136        | 779.3934       | 390.2003         | 778.4094       | 389.7083         | A    | 443.2613  | 222.1343        | 426.2347       | 213.6210         |                |                  | 5  |
| 9  | 853.4414  | 427.2243        | 836.4149       | 418.7111         | 835.4308       | 418.2191         | G    | 372.2241  | 186.6157        | 355.1976       | 178.1024         |                |                  | 4  |
| 10 | 924.4785  | 462.7429        | 907.4520       | 454.2296         | 906.4680       | 453.7376         | A    | 315.2027  | 158.1050        | 298.1761       | 149.5917         |                |                  | 3  |
| 11 | 1021.5313 | 511.2693        | 1004.5047      | 502.7560         | 1003.5207      | 502.2640         | P    | 244.1656  | 122.5864        | 227.1390       | 114.0731         |                |                  | 2  |
| 12 |           |                 |                |                  |                |                  | K    | 147.1128  | 74.0600         | 130.0863       | 65.5468          |                |                  | 1  |

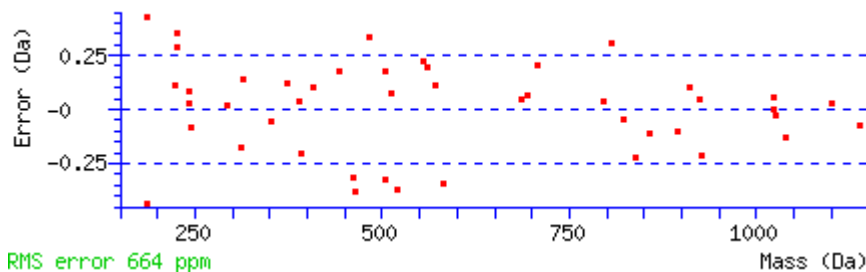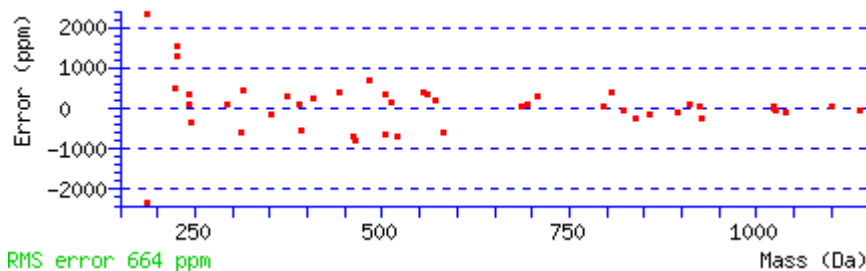



IDENTIFICATION 103

MS/MS Fragmentation of AGDVLEDSPKRPK

Found in IPI00313817

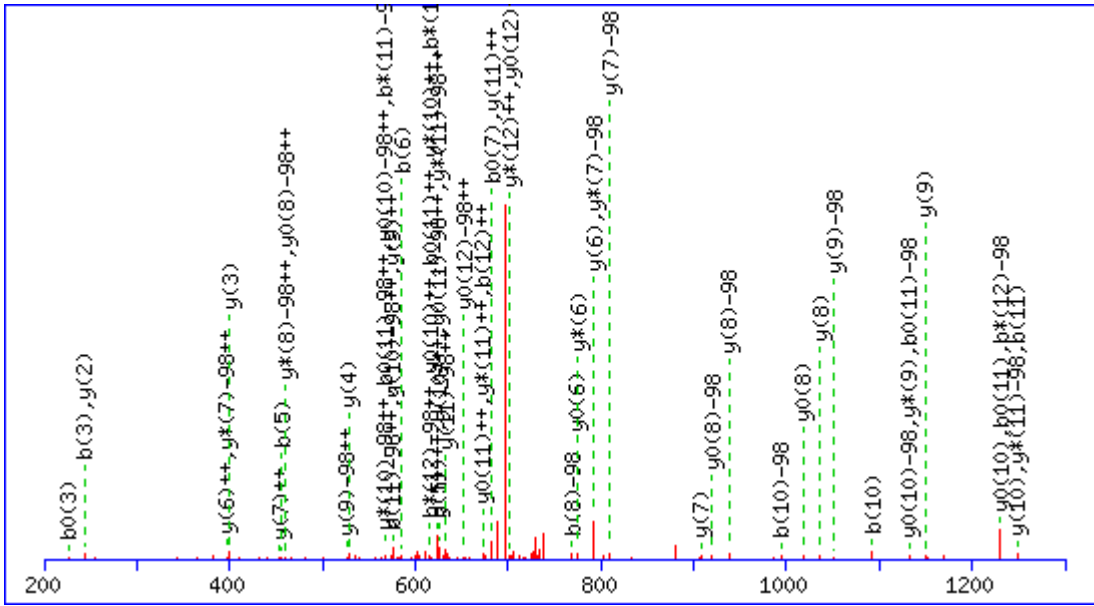

Monoisotopic mass of neutral peptide Mr(calc): 1490.7130

Fixed modifications: Carbamidomethyl (C) (apply to specified residues or termini only)

Variable modifications:

S8 : Phospho (ST), with neutral losses 0.0000 (shown in table), 97.9769

Ions Score: 49 Expect: 0.0014 (help)

| #  | b         | b <sup>++</sup> | b <sup>*</sup> | b <sup>+++</sup> | b <sup>0</sup> | b <sup>0++</sup> | Seq. | y         | y <sup>++</sup> | y <sup>*</sup> | y <sup>+++</sup> | y <sup>0</sup> | y <sup>0++</sup> | #  |
|----|-----------|-----------------|----------------|------------------|----------------|------------------|------|-----------|-----------------|----------------|------------------|----------------|------------------|----|
| 1  | 72.0444   | 36.5258         |                |                  |                |                  | A    |           |                 |                |                  |                |                  | 13 |
| 2  | 129.0659  | 65.0366         |                |                  |                |                  | G    | 1420.6832 | 710.8452        | 1403.6566      | 702.3320         | 1402.6726      | 701.8399         | 12 |
| 3  | 244.0928  | 122.5500        |                |                  | 226.0822       | 113.5448         | D    | 1363.6617 | 682.3345        | 1346.6352      | 673.8212         | 1345.6512      | 673.3292         | 11 |
| 4  | 343.1612  | 172.0842        |                |                  | 325.1506       | 163.0790         | V    | 1248.6348 | 624.8210        | 1231.6082      | 616.3078         | 1230.6242      | 615.8157         | 10 |
| 5  | 456.2453  | 228.6263        |                |                  | 438.2347       | 219.6210         | L    | 1149.5664 | 575.2868        | 1132.5398      | 566.7735         | 1131.5558      | 566.2815         | 9  |
| 6  | 585.2879  | 293.1476        |                |                  | 567.2773       | 284.1423         | E    | 1036.4823 | 518.7448        | 1019.4558      | 510.2315         | 1018.4717      | 509.7395         | 8  |
| 7  | 700.3148  | 350.6610        |                |                  | 682.3042       | 341.6558         | D    | 907.4397  | 454.2235        | 890.4132       | 445.7102         | 889.4291       | 445.2182         | 7  |
| 8  | 867.3132  | 434.1602        |                |                  | 849.3026       | 425.1549         | S    | 792.4128  | 396.7100        | 775.3862       | 388.1967         | 774.4022       | 387.7047         | 6  |
| 9  | 964.3659  | 482.6866        |                |                  | 946.3554       | 473.6813         | P    | 625.4144  | 313.2108        | 608.3879       | 304.6976         |                |                  | 5  |
| 10 | 1092.4609 | 546.7341        | 1075.4343      | 538.2208         | 1074.4503      | 537.7288         | K    | 528.3616  | 264.6845        | 511.3351       | 256.1712         |                |                  | 4  |
| 11 | 1248.5620 | 624.7846        | 1231.5355      | 616.2714         | 1230.5514      | 615.7794         | R    | 400.2667  | 200.6370        | 383.2401       | 192.1237         |                |                  | 3  |
| 12 | 1345.6148 | 673.3110        | 1328.5882      | 664.7977         | 1327.6042      | 664.3057         | P    | 244.1656  | 122.5864        | 227.1390       | 114.0731         |                |                  | 2  |
| 13 |           |                 |                |                  |                |                  | K    | 147.1128  | 74.0600         | 130.0863       | 65.5468          |                |                  | 1  |

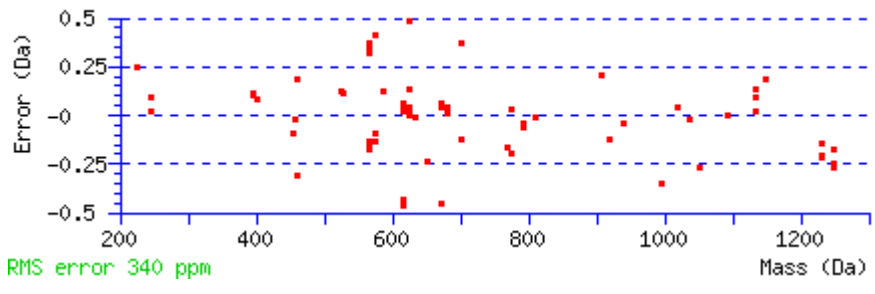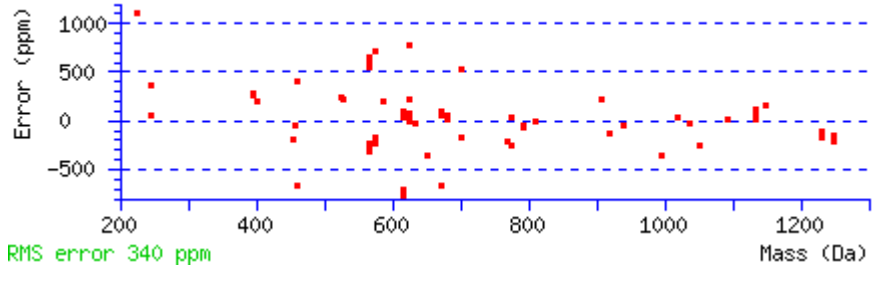

IDENTIFICATION 104

MS/MS Fragmentation of **CGSGPVIHSQQLVAVEEDAEEDEEDVK**

Found in **IPI00127415**

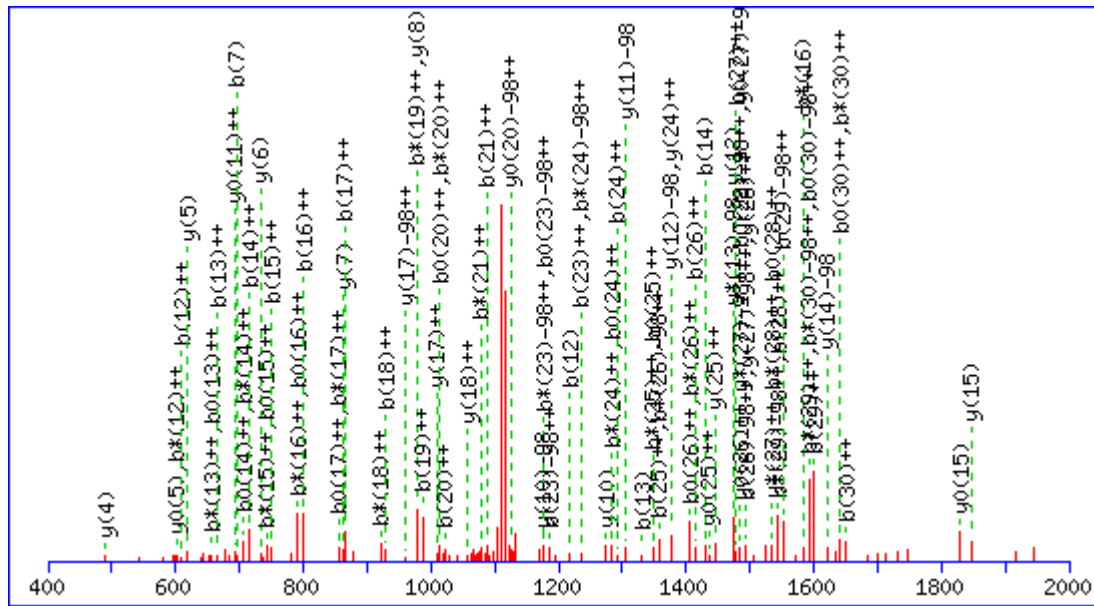

Monoisotopic mass of neutral peptide Mr(calc): 3445.4141

Fixed modifications: Carbamidomethyl (C) (apply to specified residues or termini only)

Variable modifications:

S22 : Phospho (ST), with neutral losses 0.0000(shown in table), 97.9769

Ions Score: 89 Expect: 3.4e-07 (help)

| #  | b         | b++       | b*        | b***      | b <sup>0</sup> | b <sup>0++</sup> | Seq. | y         | y++       | y*        | y***      | y <sup>0</sup> | y <sup>0++</sup> | #  |
|----|-----------|-----------|-----------|-----------|----------------|------------------|------|-----------|-----------|-----------|-----------|----------------|------------------|----|
| 1  | 161.0379  | 81.0226   |           |           |                |                  | C    |           |           |           |           |                |                  | 31 |
| 2  | 218.0594  | 109.5333  |           |           |                |                  | G    | 3286.3907 | 1643.6990 | 3269.3642 | 1635.1857 | 3268.3801      | 1634.6937        | 30 |
| 3  | 305.0914  | 153.0493  |           |           | 287.0809       | 144.0441         | S    | 3229.3692 | 1615.1883 | 3212.3427 | 1606.6750 | 3211.3587      | 1606.1830        | 29 |
| 4  | 362.1129  | 181.5601  |           |           | 344.1023       | 172.5548         | G    | 3142.3372 | 1571.6722 | 3125.3107 | 1563.1590 | 3124.3267      | 1562.6670        | 28 |
| 5  | 459.1656  | 230.0865  |           |           | 441.1551       | 221.0812         | P    | 3085.3158 | 1543.1615 | 3068.2892 | 1534.6482 | 3067.3052      | 1534.1562        | 27 |
| 6  | 558.2341  | 279.6207  |           |           | 540.2235       | 270.6154         | V    | 2988.2630 | 1494.6351 | 2971.2364 | 1486.1219 | 2970.2524      | 1485.6299        | 26 |
| 7  | 695.2930  | 348.1501  |           |           | 677.2824       | 339.1448         | H    | 2889.1946 | 1445.1009 | 2872.1680 | 1436.5877 | 2871.1840      | 1436.0956        | 25 |
| 8  | 808.3770  | 404.6922  |           |           | 790.3665       | 395.6869         | I    | 2752.1357 | 1376.5715 | 2735.1091 | 1368.0582 | 2734.1251      | 1367.5662        | 24 |
| 9  | 895.4091  | 448.2082  |           |           | 877.3985       | 439.2029         | S    | 2639.0516 | 1320.0294 | 2622.0251 | 1311.5162 | 2621.0410      | 1311.0242        | 23 |
| 10 | 952.4305  | 476.7189  |           |           | 934.4200       | 467.7136         | G    | 2552.0196 | 1276.5134 | 2534.9930 | 1268.0002 | 2534.0090      | 1267.5081        | 22 |
| 11 | 1080.4891 | 540.7482  | 1063.4626 | 532.2349  | 1062.4785      | 531.7429         | Q    | 2494.9981 | 1248.0027 | 2477.9716 | 1239.4894 | 2476.9875      | 1238.9974        | 21 |
| 12 | 1217.5480 | 609.2776  | 1200.5215 | 600.7644  | 1199.5375      | 600.2724         | H    | 2366.9395 | 1183.9734 | 2349.9130 | 1175.4601 | 2348.9290      | 1174.9681        | 20 |
| 13 | 1330.6321 | 665.8197  | 1313.6055 | 657.3064  | 1312.6215      | 656.8144         | L    | 2229.8806 | 1115.4439 | 2212.8541 | 1106.9307 | 2211.8701      | 1106.4387        | 19 |
| 14 | 1429.7005 | 715.3539  | 1412.6739 | 706.8406  | 1411.6899      | 706.3486         | V    | 2116.7966 | 1058.9019 | 2099.7700 | 1050.3886 | 2098.7860      | 1049.8966        | 18 |
| 15 | 1500.7376 | 750.8724  | 1483.7111 | 742.3592  | 1482.7270      | 741.8672         | A    | 2017.7281 | 1009.3677 | 2000.7016 | 1000.8544 | 1999.7176      | 1000.3624        | 17 |
| 16 | 1599.8060 | 800.4066  | 1582.7795 | 791.8934  | 1581.7955      | 791.4014         | V    | 1946.6910 | 973.8492  | 1929.6645 | 965.3359  | 1928.6805      | 964.8439         | 16 |
| 17 | 1728.8486 | 864.9279  | 1711.8221 | 856.4147  | 1710.8381      | 855.9227         | E    | 1847.6226 | 924.3149  | 1830.5961 | 915.8017  | 1829.6120      | 915.3097         | 15 |
| 18 | 1857.8912 | 929.4492  | 1840.8647 | 920.9360  | 1839.8806      | 920.4440         | E    | 1718.5800 | 859.7936  | 1701.5535 | 851.2804  | 1700.5695      | 850.7884         | 14 |
| 19 | 1972.9182 | 986.9627  | 1955.8916 | 978.4494  | 1954.9076      | 977.9574         | D    | 1589.5374 | 795.2724  | 1572.5109 | 786.7591  | 1571.5269      | 786.2671         | 13 |
| 20 | 2043.9553 | 1022.4813 | 2026.9287 | 1013.9680 | 2025.9447      | 1013.4760        | A    | 1474.5105 | 737.7589  | 1457.4839 | 729.2456  | 1456.4999      | 728.7536         | 12 |
| 21 | 2172.9979 | 1087.0026 | 2155.9713 | 1078.4893 | 2154.9873      | 1077.9973        | E    | 1403.4734 | 702.2403  | 1386.4468 | 693.7270  | 1385.4628      | 693.2350         | 11 |
| 22 | 2339.9962 | 1170.5017 | 2322.9697 | 1161.9885 | 2321.9857      | 1161.4965        | S    | 1274.4308 | 637.7190  | 1257.4042 | 629.2058  | 1256.4202      | 628.7137         | 10 |
| 23 | 2469.0388 | 1235.0230 | 2452.0123 | 1226.5098 | 2451.0282      | 1226.0178        | E    | 1107.4324 | 554.2198  | 1090.4059 | 545.7066  | 1089.4219      | 545.2146         | 9  |
| 24 | 2584.0658 | 1292.5365 | 2567.0392 | 1284.0232 | 2566.0552      | 1283.5312        | D    | 978.3898  | 489.6986  | 961.3633  | 481.1853  | 960.3793       | 480.6933         | 8  |
| 25 | 2713.1083 | 1357.0578 | 2696.0818 | 1348.5445 | 2695.0978      | 1348.0525        | E    | 863.3629  | 432.1851  | 846.3363  | 423.6718  | 845.3523       | 423.1798         | 7  |
| 26 | 2828.1353 | 1414.5713 | 2811.1087 | 1406.0580 | 2810.1247      | 1405.5660        | D    | 734.3203  | 367.6638  | 717.2937  | 359.1505  | 716.3097       | 358.6585         | 6  |
| 27 | 2957.1779 | 1479.0926 | 2940.1513 | 1470.5793 | 2939.1673      | 1470.0873        | E    | 619.2933  | 310.1503  | 602.2668  | 301.6370  | 601.2828       | 301.1450         | 5  |

|    |           |           |           |           |           |           |   |          |          |          |          |          |          |   |
|----|-----------|-----------|-----------|-----------|-----------|-----------|---|----------|----------|----------|----------|----------|----------|---|
| 28 | 3086.2205 | 1543.6139 | 3069.1939 | 1535.1006 | 3068.2099 | 1534.6086 | E | 490.2508 | 245.6290 | 473.2242 | 237.1157 | 472.2402 | 236.6237 | 4 |
| 29 | 3201.2474 | 1601.1273 | 3184.2209 | 1592.6141 | 3183.2369 | 1592.1221 | D | 361.2082 | 181.1077 | 344.1816 | 172.5944 | 343.1976 | 172.1024 | 3 |
| 30 | 3300.3158 | 1650.6616 | 3283.2893 | 1642.1483 | 3282.3053 | 1641.6563 | V | 246.1812 | 123.5942 | 229.1547 | 115.0810 |          |          | 2 |
| 31 |           |           |           |           |           |           | K | 147.1128 | 74.0600  | 130.0863 | 65.5468  |          |          | 1 |

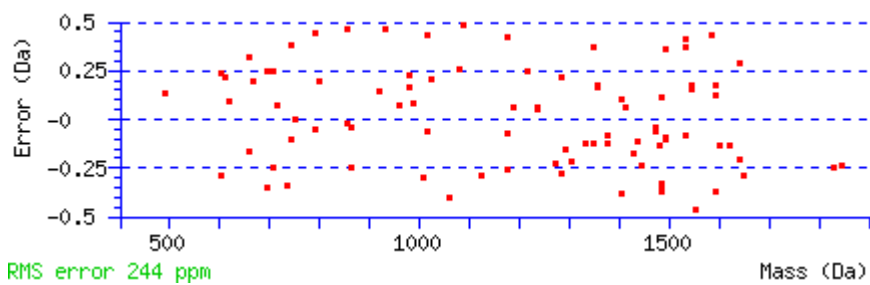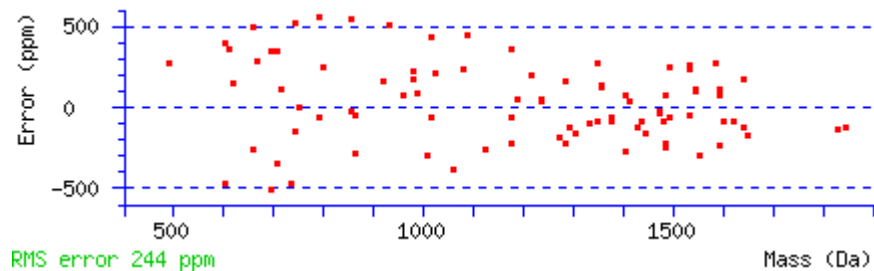



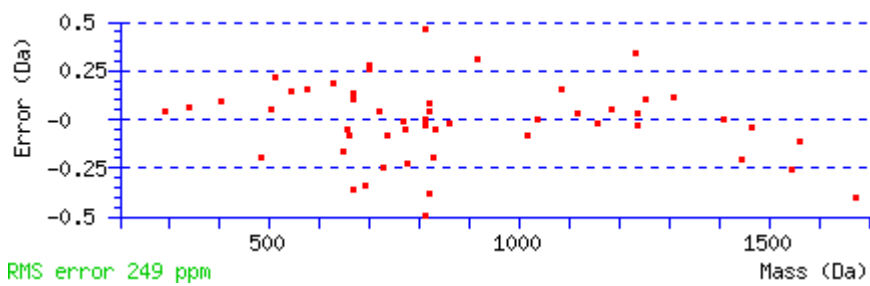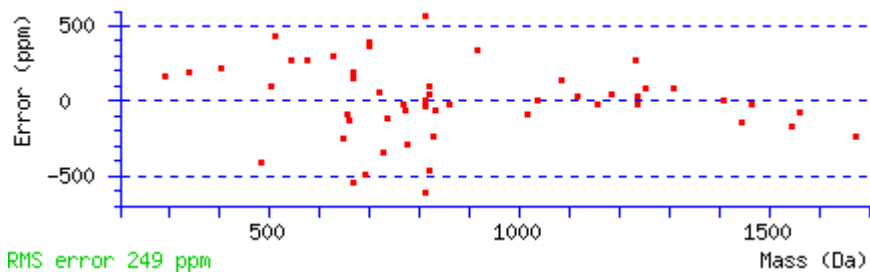

IDENTIFICATION 106

MS/MS Fragmentation of **RVPSPTVPVK**

Found in **IPI00785240**

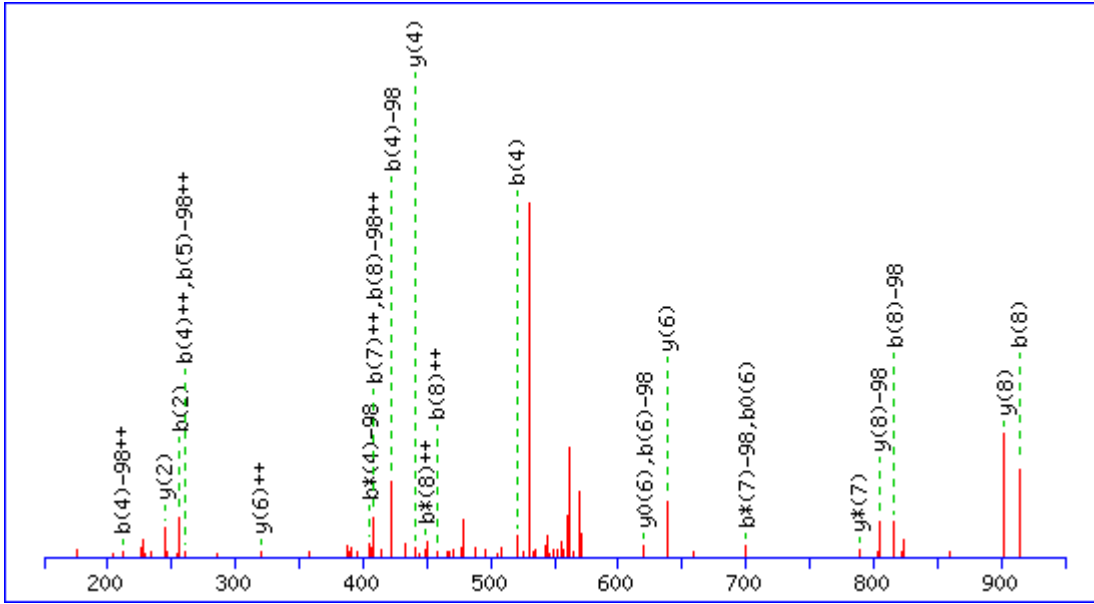

Monoisotopic mass of neutral peptide  $M_r(\text{calc})$ : 1156.6006

Fixed modifications: Carbamidomethyl (C) (apply to specified residues or termini only)

Variable modifications:

S4 : Phospho (ST), with neutral losses 97.9769 (shown in table), 0.0000

Ions Score: 27 Expect: 0.16 (help)

| #  | b        | b <sup>++</sup> | b <sup>*</sup> | b <sup>+++</sup> | b <sup>0</sup> | b <sup>0++</sup> | Seq. | y        | y <sup>++</sup> | y <sup>*</sup> | y <sup>+++</sup> | y <sup>0</sup> | y <sup>0++</sup> | #  |
|----|----------|-----------------|----------------|------------------|----------------|------------------|------|----------|-----------------|----------------|------------------|----------------|------------------|----|
| 1  | 157.1084 | 79.0578         | 140.0818       | 70.5446          |                |                  | R    |          |                 |                |                  |                |                  | 10 |
| 2  | 256.1768 | 128.5920        | 239.1503       | 120.0788         |                |                  | V    | 903.5298 | 452.2686        | 886.5033       | 443.7553         | 885.5193       | 443.2633         | 9  |
| 3  | 353.2296 | 177.1184        | 336.2030       | 168.6051         |                |                  | P    | 804.4614 | 402.7343        | 787.4349       | 394.2211         | 786.4509       | 393.7291         | 8  |
| 4  | 422.2510 | 211.6292        | 405.2245       | 203.1159         | 404.2405       | 202.6239         | S    | 707.4087 | 354.2080        | 690.3821       | 345.6947         | 689.3981       | 345.2027         | 7  |
| 5  | 519.3038 | 260.1555        | 502.2772       | 251.6423         | 501.2932       | 251.1503         | P    | 638.3872 | 319.6972        | 621.3606       | 311.1840         | 620.3766       | 310.6920         | 6  |
| 6  | 620.3515 | 310.6794        | 603.3249       | 302.1661         | 602.3409       | 301.6741         | T    | 541.3344 | 271.1709        | 524.3079       | 262.6576         | 523.3239       | 262.1656         | 5  |
| 7  | 717.4042 | 359.2058        | 700.3777       | 350.6925         | 699.3937       | 350.2005         | P    | 440.2867 | 220.6470        | 423.2602       | 212.1337         |                |                  | 4  |
| 8  | 816.4726 | 408.7400        | 799.4461       | 400.2267         | 798.4621       | 399.7347         | V    | 343.2340 | 172.1206        | 326.2074       | 163.6074         |                |                  | 3  |
| 9  | 913.5254 | 457.2663        | 896.4989       | 448.7531         | 895.5148       | 448.2611         | P    | 244.1656 | 122.5864        | 227.1390       | 114.0731         |                |                  | 2  |
| 10 |          |                 |                |                  |                |                  | K    | 147.1128 | 74.0600         | 130.0863       | 65.5468          |                |                  | 1  |

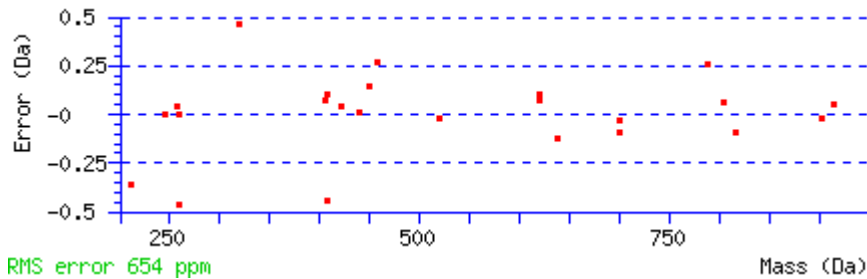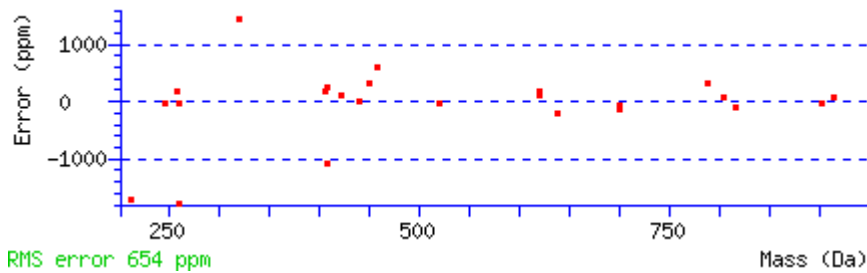

IDENTIFICATION 107

MS/MS Fragmentation of **LRSEDGVEGDLGETQSR**

Found in **IPI00553798**

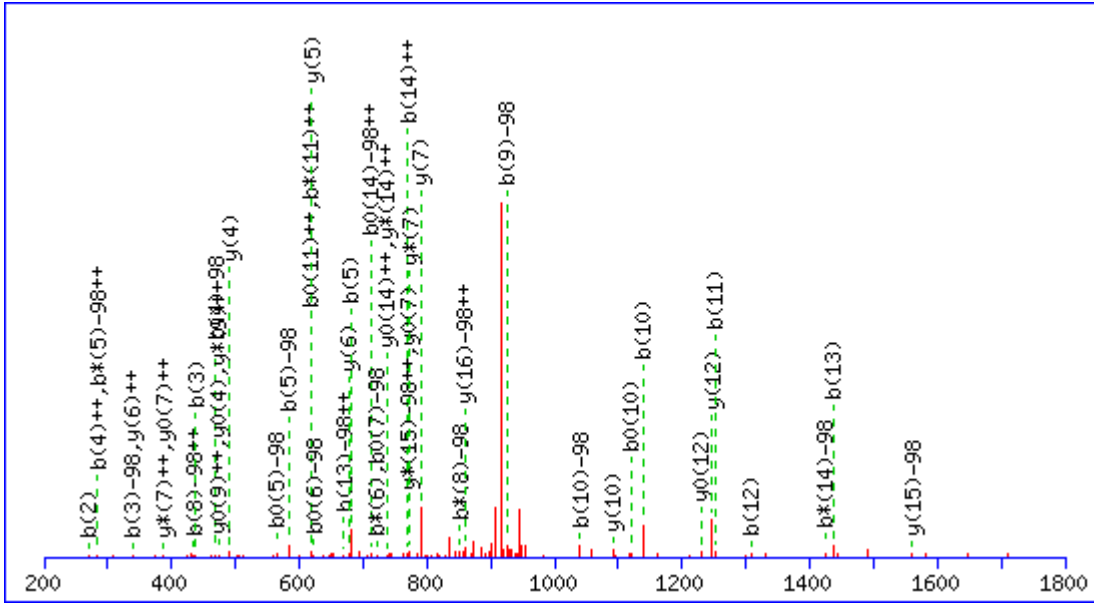

Monoisotopic mass of neutral peptide Mr(calc): 1926.8320 Fixed modifications: Carbamidomethyl (C) (apply to specified residues or termini only) Variable modifications: S3 : Phospho (ST), with neutral losses 97.9769 (shown in table), 0.0000 Ions Score: 32 Expect: 0.11 (help)

| #  | b         | b <sup>++</sup> | b <sup>*</sup> | b <sup>+</sup> | b <sup>0</sup> | b <sup>0++</sup> | Seq. | y         | y <sup>++</sup> | y <sup>*</sup> | y <sup>+++</sup> | y <sup>0</sup> | y <sup>0++</sup> | #  |
|----|-----------|-----------------|----------------|----------------|----------------|------------------|------|-----------|-----------------|----------------|------------------|----------------|------------------|----|
| 1  | 114.0913  | 57.5493         |                |                |                |                  | L    |           |                 |                |                  |                |                  | 17 |
| 2  | 270.1925  | 135.5999        | 253.1659       | 127.0866       |                |                  | R    | 1716.7783 | 858.8928        | 1699.7518      | 850.3795         | 1698.7678      | 849.8875         | 16 |
| 3  | 339.2139  | 170.1106        | 322.1874       | 161.5973       | 321.2033       | 161.1053         | S    | 1560.6772 | 780.8423        | 1543.6507      | 772.3290         | 1542.6667      | 771.8370         | 15 |
| 4  | 468.2565  | 234.6319        | 451.2300       | 226.1186       | 450.2459       | 225.6266         | E    | 1491.6558 | 746.3315        | 1474.6292      | 737.8182         | 1473.6452      | 737.3262         | 14 |
| 5  | 583.2835  | 292.1454        | 566.2569       | 283.6321       | 565.2729       | 283.1401         | D    | 1362.6132 | 681.8102        | 1345.5866      | 673.2970         | 1344.6026      | 672.8049         | 13 |
| 6  | 640.3049  | 320.6561        | 623.2784       | 312.1428       | 622.2943       | 311.6508         | G    | 1247.5862 | 624.2968        | 1230.5597      | 615.7835         | 1229.5757      | 615.2915         | 12 |
| 7  | 739.3733  | 370.1903        | 722.3468       | 361.6770       | 721.3628       | 361.1850         | V    | 1190.5648 | 595.7860        | 1173.5382      | 587.2727         | 1172.5542      | 586.7807         | 11 |
| 8  | 868.4159  | 434.7116        | 851.3894       | 426.1983       | 850.4054       | 425.7063         | E    | 1091.4964 | 546.2518        | 1074.4698      | 537.7385         | 1073.4858      | 537.2465         | 10 |
| 9  | 925.4374  | 463.2223        | 908.4108       | 454.7091       | 907.4268       | 454.2170         | G    | 962.4538  | 481.7305        | 945.4272       | 473.2172         | 944.4432       | 472.7252         | 9  |
| 10 | 1040.4643 | 520.7358        | 1023.4378      | 512.2225       | 1022.4538      | 511.7305         | D    | 905.4323  | 453.2198        | 888.4058       | 444.7065         | 887.4217       | 444.2145         | 8  |
| 11 | 1153.5484 | 577.2778        | 1136.5218      | 568.7646       | 1135.5378      | 568.2726         | L    | 790.4054  | 395.7063        | 773.3788       | 387.1930         | 772.3948       | 386.7010         | 7  |
| 12 | 1210.5699 | 605.7886        | 1193.5433      | 597.2753       | 1192.5593      | 596.7833         | G    | 677.3213  | 339.1643        | 660.2947       | 330.6510         | 659.3107       | 330.1590         | 6  |
| 13 | 1339.6124 | 670.3099        | 1322.5859      | 661.7966       | 1321.6019      | 661.3046         | E    | 620.2998  | 310.6536        | 603.2733       | 302.1403         | 602.2893       | 301.6483         | 5  |
| 14 | 1440.6601 | 720.8337        | 1423.6336      | 712.3204       | 1422.6496      | 711.8284         | T    | 491.2572  | 246.1323        | 474.2307       | 237.6190         | 473.2467       | 237.1270         | 4  |
| 15 | 1568.7187 | 784.8630        | 1551.6922      | 776.3497       | 1550.7081      | 775.8577         | Q    | 390.2096  | 195.6084        | 373.1830       | 187.0951         | 372.1990       | 186.6031         | 3  |
| 16 | 1655.7507 | 828.3790        | 1638.7242      | 819.8657       | 1637.7402      | 819.3737         | S    | 262.1510  | 131.5791        | 245.1244       | 123.0659         | 244.1404       | 122.5738         | 2  |
| 17 |           |                 |                |                |                |                  | R    | 175.1190  | 88.0631         | 158.0924       | 79.5498          |                |                  | 1  |



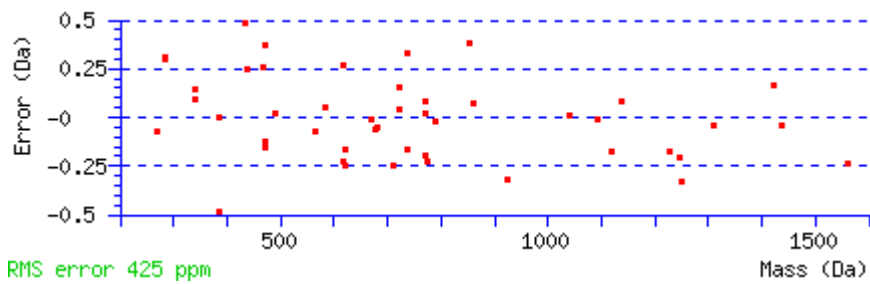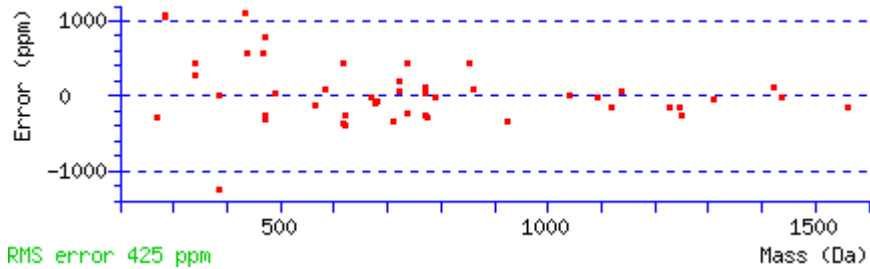

IDENTIFICATION 108

MS/MS Fragmentation of **TNPPTQKPPSPVSGR**

Found in **IPI00454179**

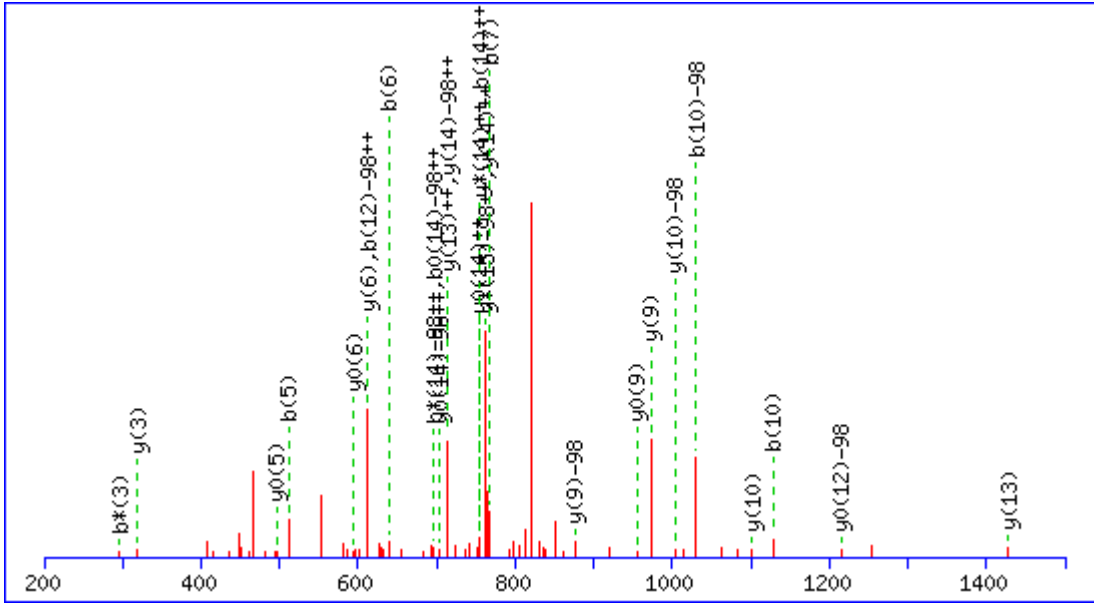

Monoisotopic mass of neutral peptide Mr(calc): 1738.8403

Fixed modifications: Carbamidomethyl (C) (apply to specified residues or termini only)

Variable modifications:

S10 : Phospho (ST), with neutral losses 0.0000(shown in table), 97.9769

Ions Score: 21 Expect: 0.91 (help)

| #  | b                | b <sup>++</sup> | b <sup>*</sup>  | b <sup>+++</sup> | b <sup>0</sup> | b <sup>0++</sup> | Seq. | y                | y <sup>++</sup> | y <sup>*</sup> | y <sup>+++</sup> | y <sup>0</sup>  | y <sup>0++</sup> | #  |
|----|------------------|-----------------|-----------------|------------------|----------------|------------------|------|------------------|-----------------|----------------|------------------|-----------------|------------------|----|
| 1  | 102.0550         | 51.5311         |                 |                  | 84.0444        | 42.5258          | T    |                  |                 |                |                  |                 |                  | 16 |
| 2  | 216.0979         | 108.5526        | 199.0713        | 100.0393         | 198.0873       | 99.5473          | N    | 1638.7999        | 819.9036        | 1621.7734      | 811.3903         | 1620.7894       | 810.8983         | 15 |
| 3  | 313.1506         | 157.0790        | <b>296.1241</b> | 148.5657         | 295.1401       | 148.0737         | P    | 1524.7570        | <b>762.8821</b> | 1507.7305      | <b>754.3689</b>  | 1506.7465       | <b>753.8769</b>  | 14 |
| 4  | 410.2034         | 205.6053        | 393.1769        | 197.0921         | 392.1928       | 196.6001         | P    | <b>1427.7043</b> | <b>714.3558</b> | 1410.6777      | 705.8425         | 1409.6937       | 705.3505         | 13 |
| 5  | <b>511.2511</b>  | 256.1292        | 494.2245        | 247.6159         | 493.2405       | 247.1239         | T    | 1330.6515        | 665.8294        | 1313.6249      | 657.3161         | 1312.6409       | 656.8241         | 12 |
| 6  | <b>639.3097</b>  | 320.1585        | 622.2831        | 311.6452         | 621.2991       | 311.1532         | Q    | 1229.6038        | 615.3055        | 1212.5773      | 606.7923         | 1211.5932       | 606.3003         | 11 |
| 7  | <b>767.4046</b>  | 384.2060        | 750.3781        | 375.6927         | 749.3941       | 375.2007         | K    | <b>1101.5452</b> | 551.2763        | 1084.5187      | 542.7630         | 1083.5347       | 542.2710         | 10 |
| 8  | 864.4574         | 432.7323        | 847.4308        | 424.2191         | 846.4468       | 423.7271         | P    | <b>973.4503</b>  | 487.2288        | 956.4237       | 478.7155         | <b>955.4397</b> | 478.2235         | 9  |
| 9  | 961.5102         | 481.2587        | 944.4836        | 472.7454         | 943.4996       | 472.2534         | P    | 876.3975         | 438.7024        | 859.3710       | 430.1891         | 858.3869        | 429.6971         | 8  |
| 10 | <b>1128.5085</b> | 564.7579        | 1111.4820       | 556.2446         | 1110.4980      | 555.7526         | S    | 779.3447         | 390.1760        | 762.3182       | 381.6627         | 761.3342        | 381.1707         | 7  |
| 11 | 1225.5613        | 613.2843        | 1208.5347       | 604.7710         | 1207.5507      | 604.2790         | P    | <b>612.3464</b>  | 306.6768        | 595.3198       | 298.1636         | <b>594.3358</b> | 297.6715         | 6  |
| 12 | 1322.6140        | 661.8107        | 1305.5875       | 653.2974         | 1304.6035      | 652.8054         | P    | 515.2936         | 258.1504        | 498.2671       | 249.6372         | <b>497.2831</b> | 249.1452         | 5  |
| 13 | 1421.6825        | 711.3449        | 1404.6559       | 702.8316         | 1403.6719      | 702.3396         | V    | 418.2409         | 209.6241        | 401.2143       | 201.1108         | 400.2303        | 200.6188         | 4  |
| 14 | 1508.7145        | <b>754.8609</b> | 1491.6879       | 746.3476         | 1490.7039      | 745.8556         | S    | <b>319.1724</b>  | 160.0899        | 302.1459       | 151.5766         | 301.1619        | 151.0846         | 3  |
| 15 | 1565.7360        | 783.3716        | 1548.7094       | 774.8583         | 1547.7254      | 774.3663         | G    | 232.1404         | 116.5738        | 215.1139       | 108.0606         |                 |                  | 2  |
| 16 |                  |                 |                 |                  |                |                  | R    | 175.1190         | 88.0631         | 158.0924       | 79.5498          |                 |                  | 1  |

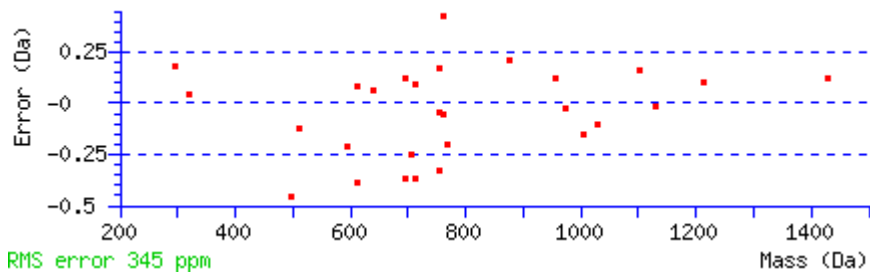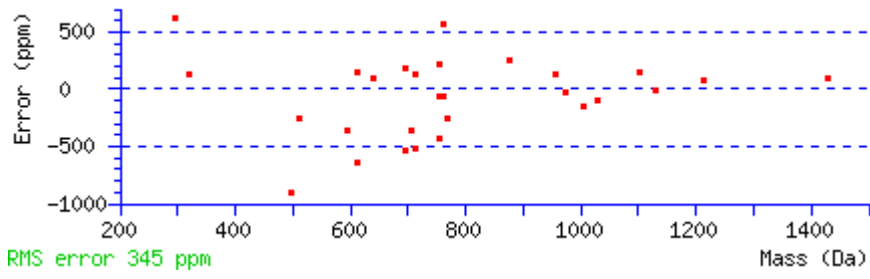

IDENTIFICATION 109

MS/MS Fragmentation of **STSPAPADVAPAQEDLR**

Found in **IPI00130095**

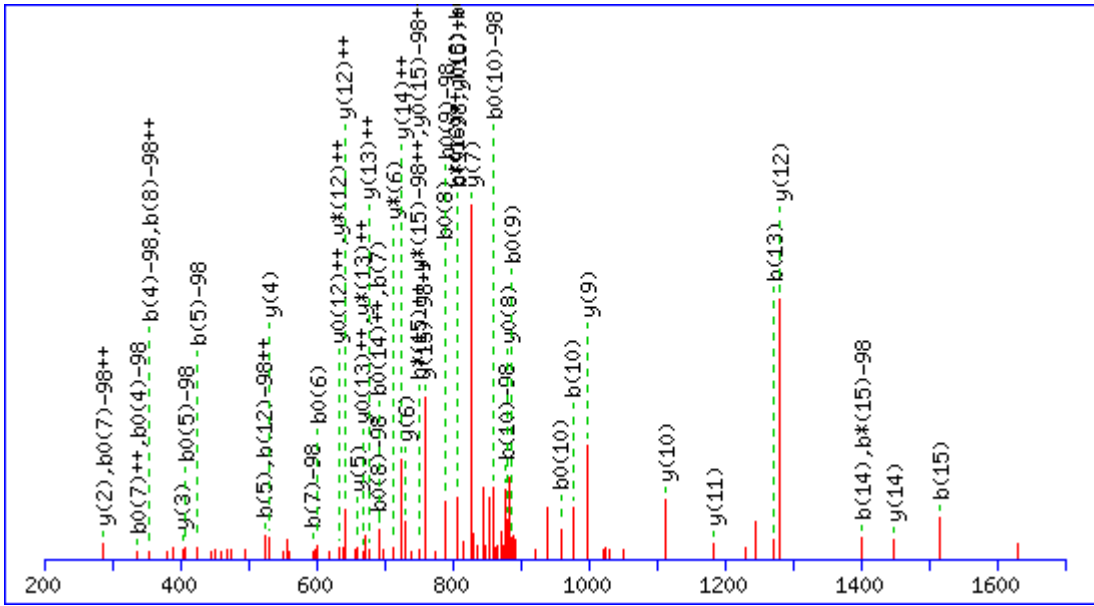

Monoisotopic mass of neutral peptide Mr(calc): 1803.8040 Fixed modifications: Carbamidomethyl (C) (apply to specified residues or termini only) Variable modifications: S3 : Phospho (ST), with neutral losses 97.9769 (shown in table), 0.0000 Ions Score: 70 Expect: 1.7e-05 (help)

| #  | b         | b <sup>++</sup> | b <sup>*</sup> | b <sup>+++</sup> | b <sup>0</sup> | b <sup>0++</sup> | Seq. | y         | y <sup>++</sup> | y <sup>*</sup> | y <sup>+++</sup> | y <sup>0</sup> | y <sup>0++</sup> | #  |
|----|-----------|-----------------|----------------|------------------|----------------|------------------|------|-----------|-----------------|----------------|------------------|----------------|------------------|----|
| 1  | 88.0393   | 44.5233         |                |                  | 70.0287        | 35.5180          | S    |           |                 |                |                  |                |                  | 17 |
| 2  | 189.0870  | 95.0471         |                |                  | 171.0764       | 86.0418          | T    | 1619.8024 | 810.4048        | 1602.7758      | 801.8916         | 1601.7918      | 801.3995         | 16 |
| 3  | 258.1084  | 129.5579        |                |                  | 240.0979       | 120.5526         | S    | 1518.7547 | 759.8810        | 1501.7281      | 751.3677         | 1500.7441      | 750.8757         | 15 |
| 4  | 355.1612  | 178.0842        |                |                  | 337.1506       | 169.0790         | P    | 1449.7332 | 725.3703        | 1432.7067      | 716.8570         | 1431.7227      | 716.3650         | 14 |
| 5  | 426.1983  | 213.6028        |                |                  | 408.1878       | 204.5975         | A    | 1352.6805 | 676.8439        | 1335.6539      | 668.3306         | 1334.6699      | 667.8386         | 13 |
| 6  | 523.2511  | 262.1292        |                |                  | 505.2405       | 253.1239         | P    | 1281.6434 | 641.3253        | 1264.6168      | 632.8120         | 1263.6328      | 632.3200         | 12 |
| 7  | 594.2882  | 297.6477        |                |                  | 576.2776       | 288.6425         | A    | 1184.5906 | 592.7989        | 1167.5640      | 584.2857         | 1166.5800      | 583.7937         | 11 |
| 8  | 709.3151  | 355.1612        |                |                  | 691.3046       | 346.1559         | D    | 1113.5535 | 557.2804        | 1096.5269      | 548.7671         | 1095.5429      | 548.2751         | 10 |
| 9  | 808.3836  | 404.6954        |                |                  | 790.3730       | 395.6901         | V    | 998.5265  | 499.7669        | 981.5000       | 491.2536         | 980.5160       | 490.7616         | 9  |
| 10 | 879.4207  | 440.2140        |                |                  | 861.4101       | 431.2087         | A    | 899.4581  | 450.2327        | 882.4316       | 441.7194         | 881.4476       | 441.2274         | 8  |
| 11 | 976.4734  | 488.7404        |                |                  | 958.4629       | 479.7351         | P    | 828.4210  | 414.7141        | 811.3945       | 406.2009         | 810.4104       | 405.7089         | 7  |
| 12 | 1047.5106 | 524.2589        |                |                  | 1029.5000      | 515.2536         | A    | 731.3682  | 366.1878        | 714.3417       | 357.6745         | 713.3577       | 357.1825         | 6  |
| 13 | 1175.5691 | 588.2882        | 1158.5426      | 579.7749         | 1157.5586      | 579.2829         | Q    | 660.3311  | 330.6692        | 643.3046       | 322.1559         | 642.3206       | 321.6639         | 5  |
| 14 | 1304.6117 | 652.8095        | 1287.5852      | 644.2962         | 1286.6012      | 643.8042         | E    | 532.2726  | 266.6399        | 515.2460       | 258.1266         | 514.2620       | 257.6346         | 4  |
| 15 | 1419.6387 | 710.3230        | 1402.6121      | 701.8097         | 1401.6281      | 701.3177         | D    | 403.2300  | 202.1186        | 386.2034       | 193.6053         | 385.2194       | 193.1133         | 3  |
| 16 | 1532.7227 | 766.8650        | 1515.6962      | 758.3517         | 1514.7122      | 757.8597         | L    | 288.2030  | 144.6051        | 271.1765       | 136.0919         |                |                  | 2  |
| 17 |           |                 |                |                  |                |                  | R    | 175.1190  | 88.0631         | 158.0924       | 79.5498          |                |                  | 1  |

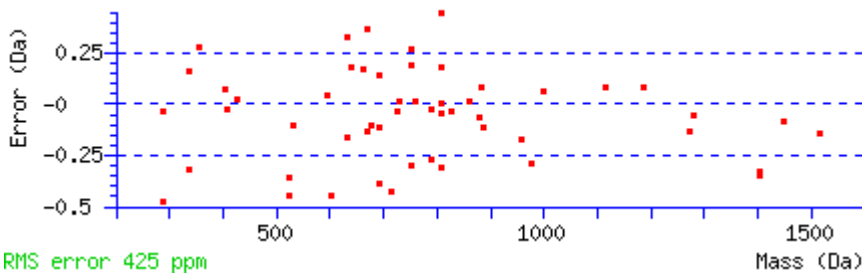

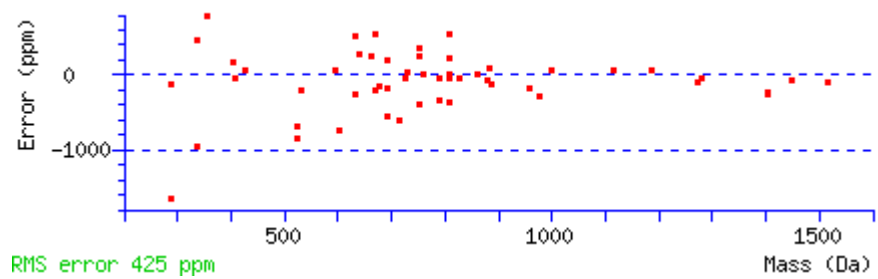

IDENTIFICATION 110

MS/MS Fragmentation of **STSPAPADVAPAQEDLR**

Found in **IPI00130095**

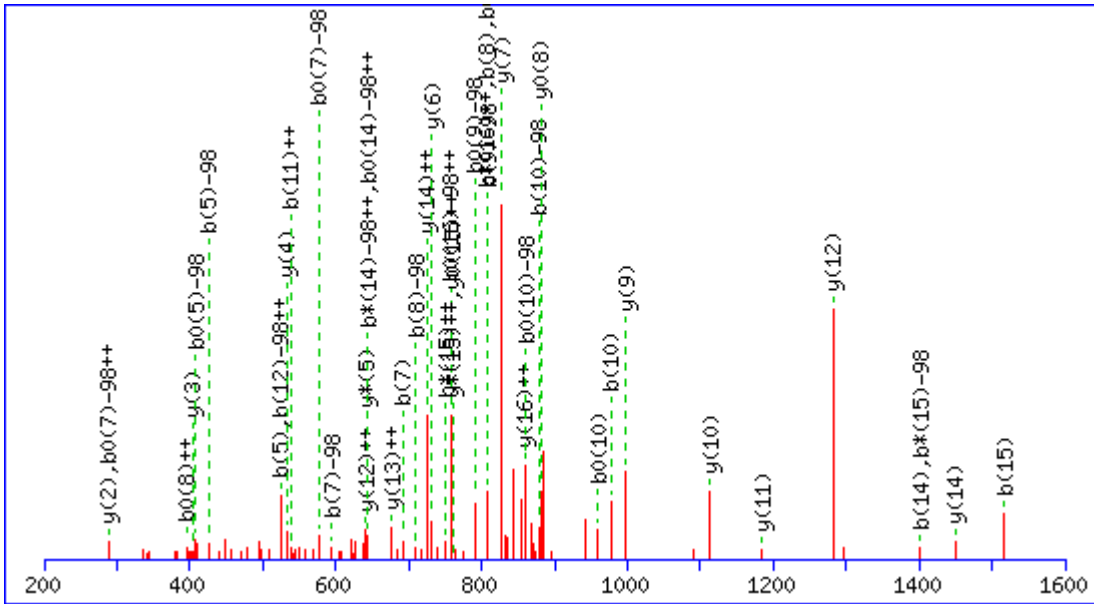

Monoisotopic mass of neutral peptide Mr(calc): 1803.8040

Fixed modifications: Carbamidomethyl (C) (apply to specified residues or termini only)

Variable modifications:

T2 : Phospho (ST), with neutral losses 0.0000(shown in table), 97.9769

Ions Score: 60 Expect: 0.00018 (help)

| #  | b         | b <sup>++</sup> | b <sup>*</sup> | b <sup>+++</sup> | b <sup>0</sup> | b <sup>0++</sup> | Seq. | y         | y <sup>++</sup> | y <sup>*</sup> | y <sup>+++</sup> | y <sup>0</sup> | y <sup>0++</sup> | #  |
|----|-----------|-----------------|----------------|------------------|----------------|------------------|------|-----------|-----------------|----------------|------------------|----------------|------------------|----|
| 1  | 88.0393   | 44.5233         |                |                  | 70.0287        | 35.5180          | S    |           |                 |                |                  |                |                  | 17 |
| 2  | 269.0533  | 135.0303        |                |                  | 251.0427       | 126.0250         | T    | 1717.7793 | 859.3933        | 1700.7527      | 850.8800         | 1699.7687      | 850.3880         | 16 |
| 3  | 356.0853  | 178.5463        |                |                  | 338.0748       | 169.5410         | S    | 1536.7653 | 768.8863        | 1519.7387      | 760.3730         | 1518.7547      | 759.8810         | 15 |
| 4  | 453.1381  | 227.0727        |                |                  | 435.1275       | 218.0674         | P    | 1449.7332 | 725.3703        | 1432.7067      | 716.8570         | 1431.7227      | 716.3650         | 14 |
| 5  | 524.1752  | 262.5912        |                |                  | 506.1647       | 253.5860         | A    | 1352.6805 | 676.8439        | 1335.6539      | 668.3306         | 1334.6699      | 667.8386         | 13 |
| 6  | 621.2280  | 311.1176        |                |                  | 603.2174       | 302.1123         | P    | 1281.6434 | 641.3253        | 1264.6168      | 632.8120         | 1263.6328      | 632.3200         | 12 |
| 7  | 692.2651  | 346.6362        |                |                  | 674.2545       | 337.6309         | A    | 1184.5906 | 592.7989        | 1167.5640      | 584.2857         | 1166.5800      | 583.7937         | 11 |
| 8  | 807.2920  | 404.1497        |                |                  | 789.2815       | 395.1444         | D    | 1113.5535 | 557.2804        | 1096.5269      | 548.7671         | 1095.5429      | 548.2751         | 10 |
| 9  | 906.3605  | 453.6839        |                |                  | 888.3499       | 444.6786         | V    | 998.5265  | 499.7669        | 981.5000       | 491.2536         | 980.5160       | 490.7616         | 9  |
| 10 | 977.3976  | 489.2024        |                |                  | 959.3870       | 480.1971         | A    | 899.4581  | 450.2327        | 882.4316       | 441.7194         | 881.4476       | 441.2274         | 8  |
| 11 | 1074.4503 | 537.7288        |                |                  | 1056.4398      | 528.7235         | P    | 828.4210  | 414.7141        | 811.3945       | 406.2009         | 810.4104       | 405.7089         | 7  |
| 12 | 1145.4874 | 573.2474        |                |                  | 1127.4769      | 564.2421         | A    | 731.3682  | 366.1878        | 714.3417       | 357.6745         | 713.3577       | 357.1825         | 6  |
| 13 | 1273.5460 | 637.2767        | 1256.5195      | 628.7634         | 1255.5355      | 628.2714         | Q    | 660.3311  | 330.6692        | 643.3046       | 322.1559         | 642.3206       | 321.6639         | 5  |
| 14 | 1402.5886 | 701.7979        | 1385.5621      | 693.2847         | 1384.5781      | 692.7927         | E    | 532.2726  | 266.6399        | 515.2460       | 258.1266         | 514.2620       | 257.6346         | 4  |
| 15 | 1517.6156 | 759.3114        | 1500.5890      | 750.7981         | 1499.6050      | 750.3061         | D    | 403.2300  | 202.1186        | 386.2034       | 193.6053         | 385.2194       | 193.1133         | 3  |
| 16 | 1630.6996 | 815.8535        | 1613.6731      | 807.3402         | 1612.6891      | 806.8482         | L    | 288.2030  | 144.6051        | 271.1765       | 136.0919         |                |                  | 2  |
| 17 |           |                 |                |                  |                |                  | R    | 175.1190  | 88.0631         | 158.0924       | 79.5498          |                |                  | 1  |

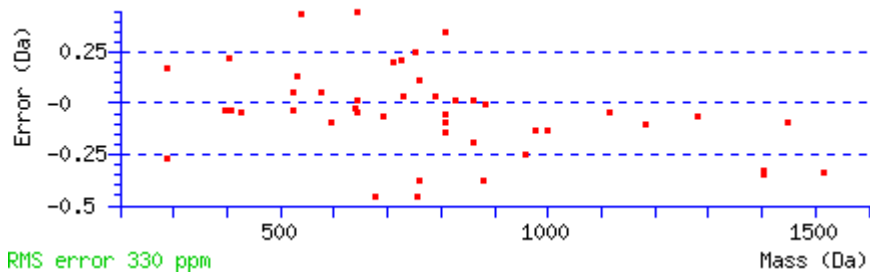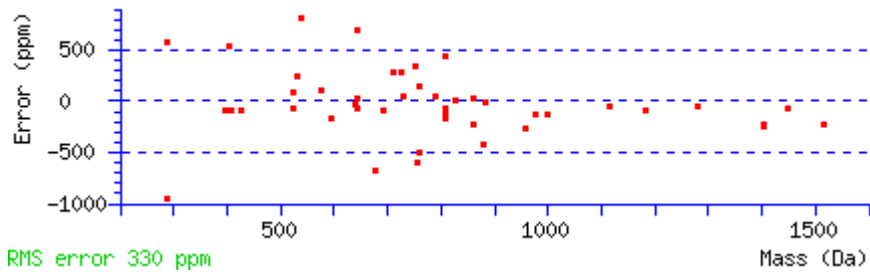

IDENTIFICATION 111

MS/MS Fragmentation of **ESDDKPEIEDVGSDEEEEEKK**

Found in **IPI00330804**

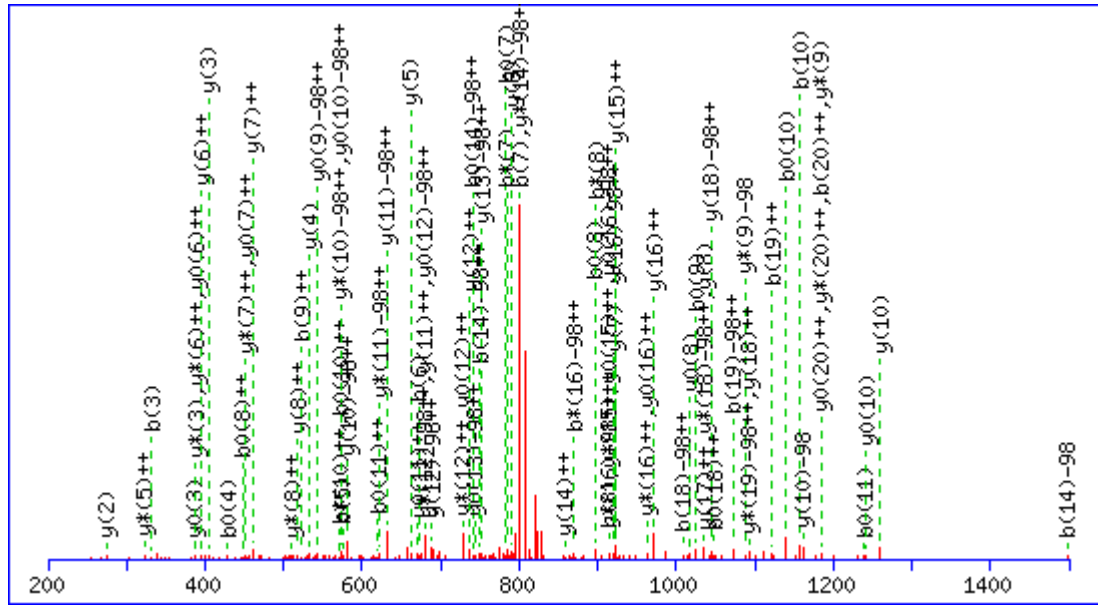

Monoisotopic mass of neutral peptide Mr(calc): 2515.0010 Fixed modifications: Carbamidomethyl (C) (apply to specified residues or termini only) Variable modifications: S13 : Phospho (ST), with neutral losses 97.9769(shown in table), 0.0000 Ions Score: 43 Expect: 0.0086 (help)

| #  | b                | b <sup>++</sup>  | b <sup>*</sup>  | b <sup>+++</sup> | b <sup>0</sup>   | b <sup>0++</sup> | Seq. | y                | y <sup>++</sup>  | y <sup>*</sup>   | y <sup>*++</sup> | y <sup>0</sup>   | y <sup>0++</sup> | #  |
|----|------------------|------------------|-----------------|------------------|------------------|------------------|------|------------------|------------------|------------------|------------------|------------------|------------------|----|
| 1  | 130.0499         | 65.5286          |                 |                  | 112.0393         | 56.5233          | E    |                  |                  |                  |                  |                  |                  | 21 |
| 2  | 217.0819         | 109.0446         |                 |                  | 199.0713         | 100.0393         | S    | 2288.9889        | 1144.9981        | 2271.9623        | 1136.4848        | 2270.9783        | 1135.9928        | 20 |
| 3  | <b>332.1088</b>  | 166.5581         |                 |                  | 314.0983         | 157.5528         | D    | 2201.9568        | 1101.4820        | 2184.9303        | <b>1092.9688</b> | 2183.9463        | 1092.4768        | 19 |
| 4  | 447.1358         | 224.0715         |                 |                  | <b>429.1252</b>  | 215.0662         | D    | 2086.9299        | <b>1043.9686</b> | 2069.9033        | <b>1035.4553</b> | 2068.9193        | 1034.9633        | 18 |
| 5  | <b>575.2307</b>  | 288.1190         | 558.2042        | 279.6057         | 557.2202         | 279.1137         | K    | 1971.9029        | 986.4551         | 1954.8764        | 977.9418         | 1953.8924        | 977.4498         | 17 |
| 6  | <b>672.2835</b>  | 336.6454         | 655.2570        | 328.1321         | 654.2729         | 327.6401         | P    | 1843.8080        | <b>922.4076</b>  | 1826.7814        | <b>913.8944</b>  | 1825.7974        | <b>913.4023</b>  | 16 |
| 7  | <b>801.3261</b>  | 401.1667         | <b>784.2996</b> | 392.6534         | <b>783.3155</b>  | 392.1614         | E    | 1746.7552        | 873.8812         | 1729.7287        | 865.3680         | 1728.7446        | 864.8760         | 15 |
| 8  | <b>914.4102</b>  | 457.7087         | <b>897.3836</b> | 449.1954         | <b>896.3996</b>  | <b>448.7034</b>  | I    | 1617.7126        | 809.3599         | 1600.6861        | <b>800.8467</b>  | 1599.7021        | 800.3547         | 14 |
| 9  | 1043.4528        | <b>522.2300</b>  | 1026.4262       | 513.7167         | <b>1025.4422</b> | 513.2247         | E    | 1504.6286        | <b>752.8179</b>  | 1487.6020        | 744.3046         | 1486.6180        | <b>743.8126</b>  | 13 |
| 10 | <b>1158.4797</b> | 579.7435         | 1141.4532       | <b>571.2302</b>  | <b>1140.4691</b> | <b>570.7382</b>  | D    | 1375.5860        | <b>688.2966</b>  | 1358.5594        | <b>679.7833</b>  | 1357.5754        | <b>679.2913</b>  | 12 |
| 11 | 1257.5481        | 629.2777         | 1240.5216       | 620.7644         | <b>1239.5376</b> | <b>620.2724</b>  | V    | 1260.5590        | <b>630.7831</b>  | 1243.5325        | <b>622.2699</b>  | 1242.5485        | 621.7779         | 11 |
| 12 | 1314.5696        | 657.7884         | 1297.5430       | 649.2752         | 1296.5590        | 648.7831         | G    | <b>1161.4906</b> | <b>581.2489</b>  | 1144.4641        | <b>572.7357</b>  | 1143.4800        | <b>572.2437</b>  | 10 |
| 13 | 1383.5910        | 692.2992         | 1366.5645       | 683.7859         | 1365.5805        | 683.2939         | S    | 1104.4691        | 552.7382         | <b>1087.4426</b> | 544.2249         | 1086.4586        | <b>543.7329</b>  | 9  |
| 14 | <b>1498.6180</b> | <b>749.8126</b>  | 1481.5914       | 741.2994         | 1480.6074        | <b>740.8073</b>  | D    | <b>1035.4477</b> | <b>518.2275</b>  | 1018.4211        | <b>509.7142</b>  | <b>1017.4371</b> | 509.2222         | 8  |
| 15 | 1627.6606        | 814.3339         | 1610.6340       | 805.8207         | 1609.6500        | 805.3286         | E    | <b>920.4207</b>  | <b>460.7140</b>  | 903.3942         | <b>452.2007</b>  | 902.4102         | <b>451.7087</b>  | 7  |
| 16 | 1756.7032        | 878.8552         | 1739.6766       | <b>870.3420</b>  | 1738.6926        | 869.8499         | E    | <b>791.3781</b>  | <b>396.1927</b>  | 774.3516         | <b>387.6794</b>  | 773.3676         | <b>387.1874</b>  | 6  |
| 17 | 1885.7458        | 943.3765         | 1868.7192       | 934.8632         | 1867.7352        | 934.3712         | E    | <b>662.3355</b>  | 331.6714         | 645.3090         | <b>323.1581</b>  | 644.3250         | 322.6661         | 5  |
| 18 | 2014.7884        | <b>1007.8978</b> | 1997.7618       | 999.3845         | 1996.7778        | 998.8925         | E    | <b>533.2930</b>  | 267.1501         | 516.2664         | 258.6368         | 515.2824         | 258.1448         | 4  |
| 19 | 2143.8310        | <b>1072.4191</b> | 2126.8044       | 1063.9058        | 2125.8204        | 1063.4138        | E    | <b>404.2504</b>  | 202.6288         | <b>387.2238</b>  | 194.1155         | <b>386.2398</b>  | 193.6235         | 3  |
| 20 | 2271.9259        | 1136.4666        | 2254.8994       | 1127.9533        | 2253.9154        | 1127.4613        | K    | <b>275.2078</b>  | 138.1075         | 258.1812         | 129.5942         |                  |                  | 2  |
| 21 |                  |                  |                 |                  |                  |                  | K    | 147.1128         | 74.0600          | 130.0863         | 65.5468          |                  |                  | 1  |



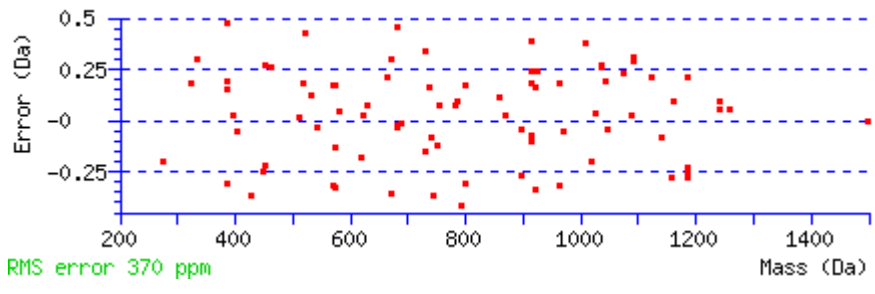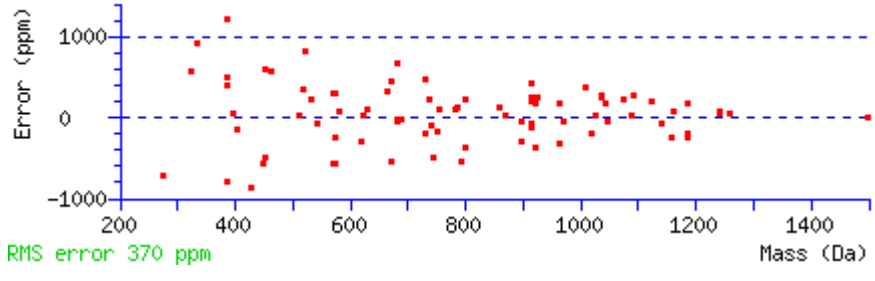

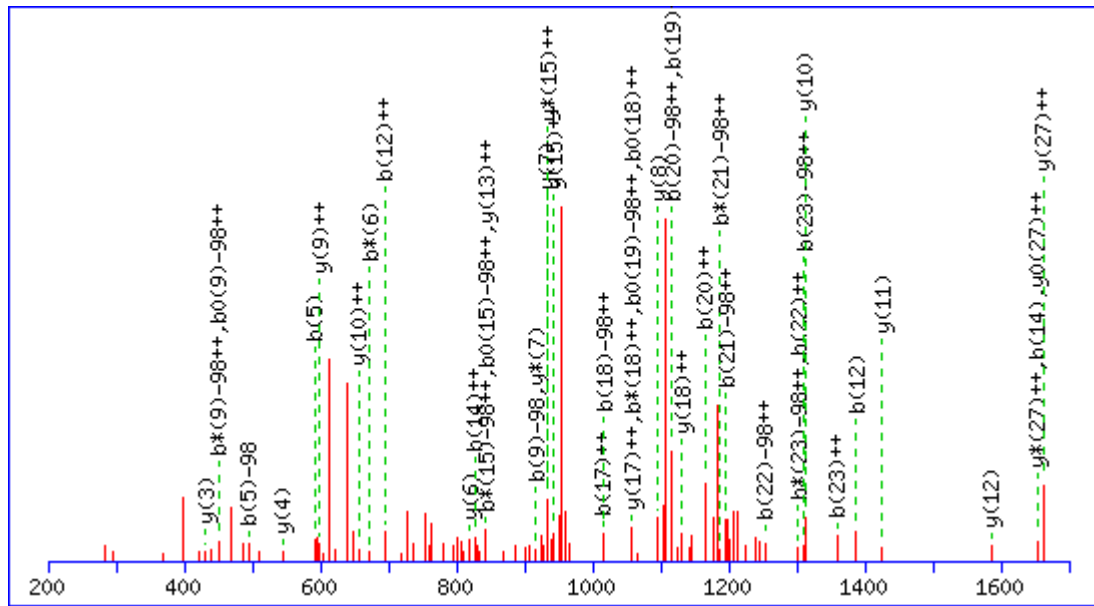

Monoisotopic mass of neutral peptide Mr(calc): 3913.6489 Fixed modifications: Carbamidomethyl (C) (apply to specified residues or termini only) Variable modifications: S3 : Phospho (ST), with neutral losses 0.0000(shown in table), 97.9769 Ions Score: 19 Expect: 4 (help)

| #  | b         | b <sup>++</sup> | b <sup>*</sup> | b <sup>+++</sup> | b <sup>0</sup> | b <sup>0++</sup> | Seq. | y         | y <sup>++</sup> | y <sup>*</sup> | y <sup>+++</sup> | y <sup>0</sup> | y <sup>0++</sup> | #  |
|----|-----------|-----------------|----------------|------------------|----------------|------------------|------|-----------|-----------------|----------------|------------------|----------------|------------------|----|
| 1  | 72.0444   | 36.5258         |                |                  |                |                  | A    |           |                 |                |                  |                |                  | 32 |
| 2  | 200.1394  | 100.5733        | 183.1128       | 92.0600          |                |                  | K    | 3843.6190 | 1922.3131       | 3826.5925      | 1913.7999        | 3825.6085      | 1913.3079        | 31 |
| 3  | 367.1377  | 184.0725        | 350.1112       | 175.5592         | 349.1271       | 175.0672         | S    | 3715.5241 | 1858.2657       | 3698.4975      | 1849.7524        | 3697.5135      | 1849.2604        | 30 |
| 4  | 464.1905  | 232.5989        | 447.1639       | 224.0856         | 446.1799       | 223.5936         | P    | 3548.5257 | 1774.7665       | 3531.4991      | 1766.2532        | 3530.5151      | 1765.7612        | 29 |
| 5  | 592.2491  | 296.6282        | 575.2225       | 288.1149         | 574.2385       | 287.6229         | Q    | 3451.4729 | 1726.2401       | 3434.4464      | 1717.7268        | 3433.4624      | 1717.2348        | 28 |
| 6  | 689.3018  | 345.1545        | 672.2753       | 336.6413         | 671.2913       | 336.1493         | P    | 3323.4144 | 1662.2108       | 3306.3878      | 1653.6975        | 3305.4038      | 1653.2055        | 27 |
| 7  | 786.3546  | 393.6809        | 769.3280       | 385.1677         | 768.3440       | 384.6756         | P    | 3226.3616 | 1613.6844       | 3209.3350      | 1605.1712        | 3208.3510      | 1604.6791        | 26 |
| 8  | 885.4230  | 443.2151        | 868.3964       | 434.7019         | 867.4124       | 434.2099         | V    | 3129.3088 | 1565.1581       | 3112.2823      | 1556.6448        | 3111.2983      | 1556.1528        | 25 |
| 9  | 1014.4656 | 507.7364        | 997.4390       | 499.2232         | 996.4550       | 498.7312         | E    | 3030.2404 | 1515.6238       | 3013.2139      | 1507.1106        | 3012.2298      | 1506.6186        | 24 |
| 10 | 1143.5082 | 572.2577        | 1126.4816      | 563.7445         | 1125.4976      | 563.2524         | E    | 2901.1978 | 1451.1025       | 2884.1713      | 1442.5893        | 2883.1873      | 1442.0973        | 23 |
| 11 | 1272.5508 | 636.7790        | 1255.5242      | 628.2658         | 1254.5402      | 627.7737         | E    | 2772.1552 | 1386.5813       | 2755.1287      | 1378.0680        | 2754.1447      | 1377.5760        | 22 |
| 12 | 1387.5777 | 694.2925        | 1370.5512      | 685.7792         | 1369.5672      | 685.2872         | D    | 2643.1126 | 1322.0600       | 2626.0861      | 1313.5467        | 2625.1021      | 1313.0547        | 21 |
| 13 | 1516.6203 | 758.8138        | 1499.5938      | 750.3005         | 1498.6097      | 749.8085         | E    | 2528.0857 | 1264.5465       | 2511.0591      | 1256.0332        | 2510.0751      | 1255.5412        | 20 |
| 14 | 1653.6792 | 827.3432        | 1636.6527      | 818.8300         | 1635.6687      | 818.3380         | H    | 2399.0431 | 1200.0252       | 2382.0165      | 1191.5119        | 2381.0325      | 1191.0199        | 19 |
| 15 | 1800.7476 | 900.8775        | 1783.7211      | 892.3642         | 1782.7371      | 891.8722         | F    | 2261.9842 | 1131.4957       | 2244.9576      | 1122.9825        | 2243.9736      | 1122.4904        | 18 |
| 16 | 1915.7746 | 958.3909        | 1898.7480      | 949.8777         | 1897.7640      | 949.3856         | D    | 2114.9158 | 1057.9615       | 2097.8892      | 1049.4482        | 2096.9052      | 1048.9562        | 17 |
| 17 | 2030.8015 | 1015.9044       | 2013.7750      | 1007.3911        | 2012.7910      | 1006.8991        | D    | 1999.8888 | 1000.4481       | 1982.8623      | 991.9348         | 1981.8783      | 991.4428         | 16 |
| 18 | 2131.8492 | 1066.4282       | 2114.8227      | 1057.9150        | 2113.8386      | 1057.4230        | T    | 1884.8619 | 942.9346        | 1867.8353      | 934.4213         | 1866.8513      | 933.9293         | 15 |
| 19 | 2230.9176 | 1115.9624       | 2213.8911      | 1107.4492        | 2212.9071      | 1106.9572        | V    | 1783.8142 | 892.4107        | 1766.7877      | 883.8975         | 1765.8036      | 883.4055         | 14 |
| 20 | 2329.9860 | 1165.4967       | 2312.9595      | 1156.9834        | 2311.9755      | 1156.4914        | V    | 1684.7458 | 842.8765        | 1667.7192      | 834.3633         | 1666.7352      | 833.8713         | 13 |
| 21 | 2490.0167 | 1245.5120       | 2472.9901      | 1236.9987        | 2472.0061      | 1236.5067        | C    | 1585.6774 | 793.3423        | 1568.6508      | 784.8291         | 1567.6668      | 784.3370         | 12 |
| 22 | 2603.1007 | 1302.0540       | 2586.0742      | 1293.5407        | 2585.0902      | 1293.0487        | L    | 1425.6467 | 713.3270        | 1408.6202      | 704.8137         | 1407.6362      | 704.3217         | 11 |
| 23 | 2718.1277 | 1359.5675       | 2701.1011      | 1351.0542        | 2700.1171      | 1350.5622        | D    | 1312.5627 | 656.7850        | 1295.5361      | 648.2717         | 1294.5521      | 647.7797         | 10 |
| 24 | 2819.1754 | 1410.0913       | 2802.1488      | 1401.5780        | 2801.1648      | 1401.0860        | T    | 1197.5357 | 599.2715        | 1180.5092      | 590.7582         | 1179.5252      | 590.2662         | 9  |
| 25 | 2982.2387 | 1491.6230       | 2965.2121      | 1483.1097        | 2964.2281      | 1482.6177        | Y    | 1096.4880 | 548.7477        | 1079.4615      | 540.2344         | 1078.4775      | 539.7424         | 8  |
| 26 | 3096.2816 | 1548.6444       | 3079.2551      | 1540.1312        | 3078.2711      | 1539.6392        | N    | 933.4247  | 467.2160        | 916.3982       | 458.7027         | 915.4141       | 458.2107         | 7  |
| 27 | 3256.3123 | 1628.6598       | 3239.2857      | 1620.1465        | 3238.3017      | 1619.6545        | C    | 819.3818  | 410.1945        | 802.3552       | 401.6813         | 801.3712       | 401.1892         | 6  |
| 28 | 3371.3392 | 1686.1732       | 3354.3127      | 1677.6600        | 3353.3286      | 1677.1680        | D    | 659.3511  | 330.1792        | 642.3246       | 321.6659         | 641.3406       | 321.1739         | 5  |
| 29 | 3484.4233 | 1742.7153       | 3467.3967      | 1734.2020        | 3466.4127      | 1733.7100        | L    | 544.3242  | 272.6657        | 527.2976       | 264.1525         |                |                  | 4  |
| 30 | 3621.4822 | 1811.2447       | 3604.4556      | 1802.7315        | 3603.4716      | 1802.2394        | H    | 431.2401  | 216.1237        | 414.2136       | 207.6104         |                |                  | 3  |

|    |           |           |           |           |           |           |   |          |          |          |          |  |  |   |
|----|-----------|-----------|-----------|-----------|-----------|-----------|---|----------|----------|----------|----------|--|--|---|
| 31 | 3768.5506 | 1884.7789 | 3751.5241 | 1876.2657 | 3750.5400 | 1875.7737 | F | 294.1812 | 147.5942 | 277.1547 | 139.0810 |  |  | 2 |
| 32 |           |           |           |           |           |           | K | 147.1128 | 74.0600  | 130.0863 | 65.5468  |  |  | 1 |

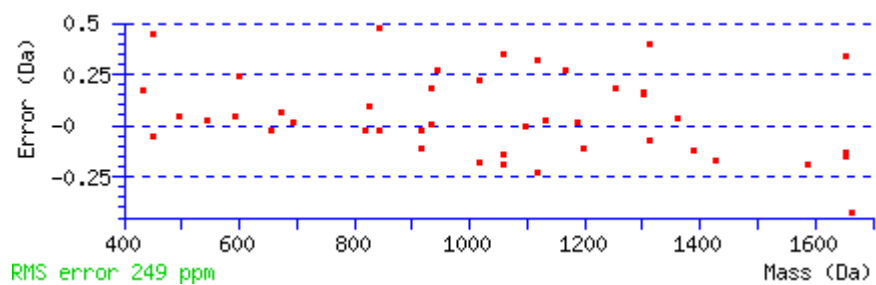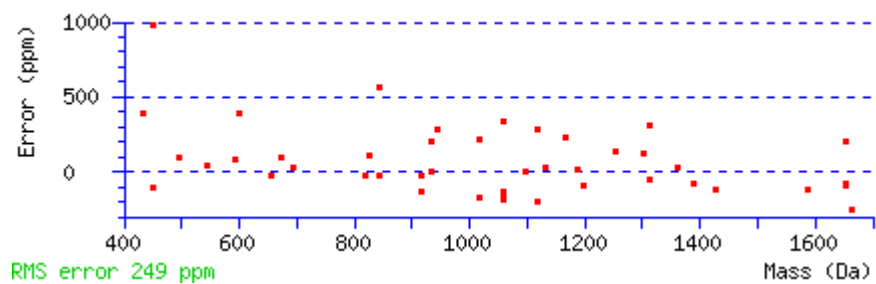

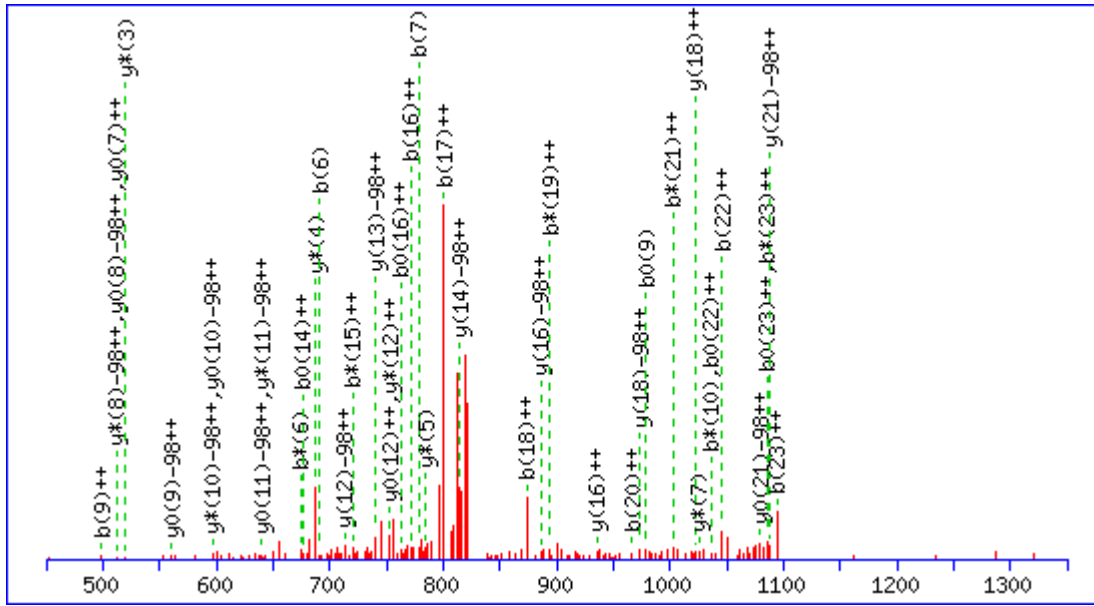

Monoisotopic mass of neutral peptide Mr(calc): 3325.4846

Fixed modifications: Carbamidomethyl (C) (apply to specified residues or termini only)

Variable modifications:

S28 : Phospho (ST), with neutral losses 97.9769 (shown in table), 0.0000

Y30 : Phospho (Y)

Ions Score: 22 Expect: 1.9 (help)

| #  | b         | b <sup>++</sup> | b <sup>*</sup> | b <sup>+++</sup> | b <sup>0</sup> | b <sup>0++</sup> | Seq. | y         | y <sup>++</sup> | y <sup>*</sup> | y <sup>+++</sup> | y <sup>0</sup> | y <sup>0++</sup> | #  |
|----|-----------|-----------------|----------------|------------------|----------------|------------------|------|-----------|-----------------|----------------|------------------|----------------|------------------|----|
| 1  | 114.0913  | 57.5493         |                |                  |                |                  | L    |           |                 |                |                  |                |                  | 31 |
| 2  | 211.1441  | 106.0757        |                |                  |                |                  | P    | 3115.4309 | 1558.2191       | 3098.4044      | 1549.7058        | 3097.4204      | 1549.2138        | 30 |
| 3  | 339.2027  | 170.1050        | 322.1761       | 161.5917         |                |                  | Q    | 3018.3782 | 1509.6927       | 3001.3516      | 1501.1795        | 3000.3676      | 1500.6874        | 29 |
| 4  | 467.2613  | 234.1343        | 450.2347       | 225.6210         |                |                  | Q    | 2890.3196 | 1445.6634       | 2873.2931      | 1437.1502        | 2872.3090      | 1436.6582        | 28 |
| 5  | 554.2933  | 277.6503        | 537.2667       | 269.1370         | 536.2827       | 268.6450         | S    | 2762.2610 | 1381.6341       | 2745.2345      | 1373.1209        | 2744.2505      | 1372.6289        | 27 |
| 6  | 691.3522  | 346.1797        | 674.3257       | 337.6665         | 673.3416       | 337.1745         | H    | 2675.2290 | 1338.1181       | 2658.2024      | 1329.6049        | 2657.2184      | 1329.1129        | 26 |
| 7  | 778.3842  | 389.6958        | 761.3577       | 381.1825         | 760.3737       | 380.6905         | S    | 2538.1701 | 1269.5887       | 2521.1435      | 1261.0754        | 2520.1595      | 1260.5834        | 25 |
| 8  | 849.4213  | 425.2143        | 832.3948       | 416.7010         | 831.4108       | 416.2090         | A    | 2451.1381 | 1226.0727       | 2434.1115      | 1217.5594        | 2433.1275      | 1217.0674        | 24 |
| 9  | 996.4898  | 498.7485        | 979.4632       | 490.2352         | 978.4792       | 489.7432         | F    | 2380.1009 | 1190.5541       | 2363.0744      | 1182.0408        | 2362.0904      | 1181.5488        | 23 |
| 10 | 1053.5112 | 527.2592        | 1036.4847      | 518.7460         | 1035.5007      | 518.2540         | G    | 2233.0325 | 1117.0199       | 2216.0060      | 1108.5066        | 2215.0220      | 1108.0146        | 22 |
| 11 | 1124.5483 | 562.7778        | 1107.5218      | 554.2645         | 1106.5378      | 553.7725         | A    | 2176.0111 | 1088.5092       | 2158.9845      | 1079.9959        | 2158.0005      | 1079.5039        | 21 |
| 12 | 1195.5854 | 598.2964        | 1178.5589      | 589.7831         | 1177.5749      | 589.2911         | A    | 2104.9739 | 1052.9906       | 2087.9474      | 1044.4773        | 2086.9634      | 1043.9853        | 20 |
| 13 | 1282.6175 | 641.8124        | 1265.5909      | 633.2991         | 1264.6069      | 632.8071         | S    | 2033.9368 | 1017.4721       | 2016.9103      | 1008.9588        | 2015.9263      | 1008.4668        | 19 |
| 14 | 1369.6495 | 685.3284        | 1352.6230      | 676.8151         | 1351.6389      | 676.3231         | S    | 1946.9048 | 973.9560        | 1929.8783      | 965.4428         | 1928.8942      | 964.9508         | 18 |
| 15 | 1456.6815 | 728.8444        | 1439.6550      | 720.3311         | 1438.6710      | 719.8391         | S    | 1859.8728 | 930.4400        | 1842.8462      | 921.9268         | 1841.8622      | 921.4347         | 17 |
| 16 | 1543.7136 | 772.3604        | 1526.6870      | 763.8471         | 1525.7030      | 763.3551         | S    | 1772.8408 | 886.9240        | 1755.8142      | 878.4107         | 1754.8302      | 877.9187         | 16 |
| 17 | 1600.7350 | 800.8712        | 1583.7085      | 792.3579         | 1582.7245      | 791.8659         | G    | 1685.8087 | 843.4080        | 1668.7822      | 834.8947         | 1667.7982      | 834.4027         | 15 |
| 18 | 1747.8034 | 874.4054        | 1730.7769      | 865.8921         | 1729.7929      | 865.4001         | F    | 1628.7873 | 814.8973        | 1611.7607      | 806.3840         | 1610.7767      | 805.8920         | 14 |
| 19 | 1804.8249 | 902.9161        | 1787.7984      | 894.4028         | 1786.8143      | 893.9108         | G    | 1481.7188 | 741.3631        | 1464.6923      | 732.8498         | 1463.7083      | 732.3578         | 13 |
| 20 | 1932.9199 | 966.9636        | 1915.8933      | 958.4503         | 1914.9093      | 957.9583         | K    | 1424.6974 | 712.8523        | 1407.6708      | 704.3391         | 1406.6868      | 703.8470         | 12 |
| 21 | 2019.9519 | 1010.4796       | 2002.9253      | 1001.9663        | 2001.9413      | 1001.4743        | S    | 1296.6024 | 648.8048        | 1279.5759      | 640.2916         | 1278.5919      | 639.7996         | 11 |
| 22 | 2090.9890 | 1045.9981       | 2073.9625      | 1037.4849        | 2072.9784      | 1036.9929        | A    | 1209.5704 | 605.2888        | 1192.5438      | 596.7756         | 1191.5598      | 596.2836         | 10 |
| 23 | 2188.0418 | 1094.5245       | 2171.0152      | 1086.0112        | 2170.0312      | 1085.5192        | P    | 1138.5333 | 569.7703        | 1121.5067      | 561.2570         | 1120.5227      | 560.7650         | 9  |
| 24 | 2285.0945 | 1143.0509       | 2268.0680      | 1134.5376        | 2267.0840      | 1134.0456        | P    | 1041.4805 | 521.2439        | 1024.4540      | 512.7306         | 1023.4699      | 512.2386         | 8  |
| 25 | 2413.1531 | 1207.0802       | 2396.1266      | 1198.5669        | 2395.1425      | 1198.0749        | Q    | 944.4277  | 472.7175        | 927.4012       | 464.2042         | 926.4172       | 463.7122         | 7  |
| 26 | 2526.2372 | 1263.6222       | 2509.2106      | 1255.1090        | 2508.2266      | 1254.6169        | L    | 816.3692  | 408.6882        | 799.3426       | 400.1749         | 798.3586       | 399.6829         | 6  |
| 27 | 2623.2899 | 1312.1486       | 2606.2634      | 1303.6353        | 2605.2794      | 1303.1433        | P    | 703.2851  | 352.1462        | 686.2586       | 343.6329         | 685.2745       | 343.1409         | 5  |

|    |           |           |           |           |           |           |   |          |          |          |          |          |          |   |
|----|-----------|-----------|-----------|-----------|-----------|-----------|---|----------|----------|----------|----------|----------|----------|---|
| 28 | 2692.3114 | 1346.6593 | 2675.2849 | 1338.1461 | 2674.3008 | 1337.6541 | S | 606.2323 | 303.6198 | 589.2058 | 295.1065 | 588.2218 | 294.6145 | 4 |
| 29 | 2839.3798 | 1420.1935 | 2822.3533 | 1411.6803 | 2821.3693 | 1411.1883 | F | 537.2109 | 269.1091 | 520.1843 | 260.5958 |          |          | 3 |
| 30 | 3082.4095 | 1541.7084 | 3065.3829 | 1533.1951 | 3064.3989 | 1532.7031 | Y | 390.1425 | 195.5749 | 373.1159 | 187.0616 |          |          | 2 |
| 31 |           |           |           |           |           |           | K | 147.1128 | 74.0600  | 130.0863 | 65.5468  |          |          | 1 |

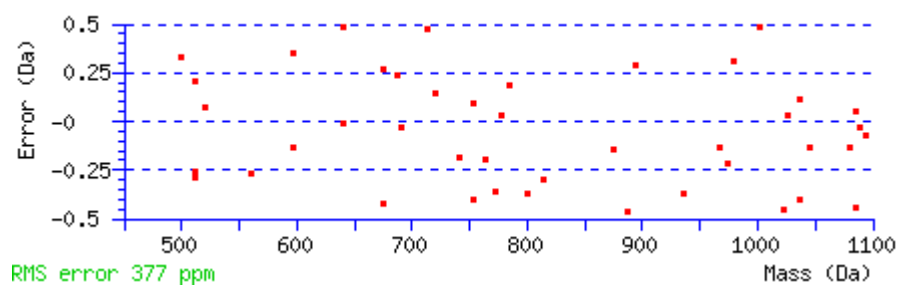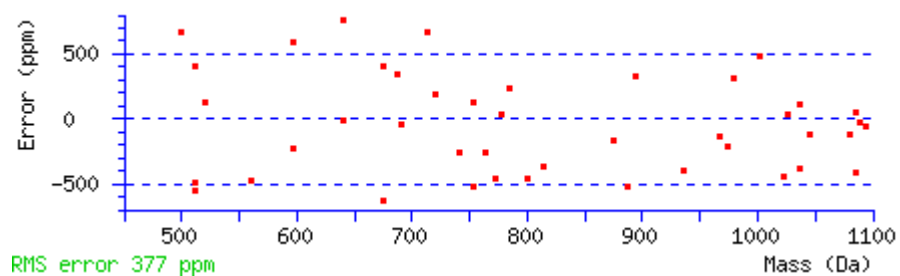

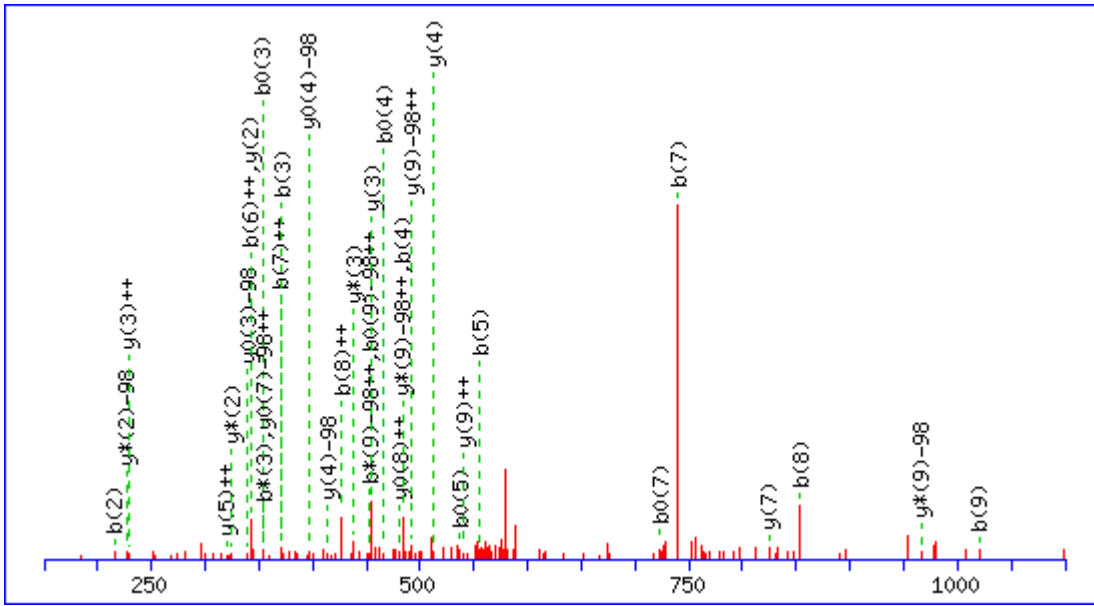

Monoisotopic mass of neutral peptide  $M_r(\text{calc})$ : 1193.6281

Fixed modifications: Carbamidomethyl (C) (apply to specified residues or termini only)

Variable modifications:

S9 : Phospho (ST), with neutral losses 0.0000 (shown in table), 97.9769

Ions Score: 26 Expect: 0.14 (help)

| #  | b         | b <sup>++</sup> | b <sup>*</sup> | b <sup>+++</sup> | b <sup>0</sup> | b <sup>0++</sup> | Seq. | y         | y <sup>++</sup> | y <sup>*</sup> | y <sup>+++</sup> | y <sup>0</sup> | y <sup>0++</sup> | #  |
|----|-----------|-----------------|----------------|------------------|----------------|------------------|------|-----------|-----------------|----------------|------------------|----------------|------------------|----|
| 1  | 114.0913  | 57.5493         |                |                  |                |                  | L    |           |                 |                |                  |                |                  | 10 |
| 2  | 215.1390  | 108.0731        |                |                  | 197.1285       | 99.0679          | T    | 1081.5514 | 541.2793        | 1064.5248      | 532.7661         | 1063.5408      | 532.2740         | 9  |
| 3  | 371.2401  | 186.1237        | 354.2136       | 177.6104         | 353.2296       | 177.1184         | R    | 980.5037  | 490.7555        | 963.4772       | 482.2422         | 962.4931       | 481.7502         | 8  |
| 4  | 484.3242  | 242.6657        | 467.2976       | 234.1525         | 466.3136       | 233.6605         | L    | 824.4026  | 412.7049        | 807.3760       | 404.1917         | 806.3920       | 403.6997         | 7  |
| 5  | 555.3613  | 278.1843        | 538.3348       | 269.6710         | 537.3507       | 269.1790         | A    | 711.3185  | 356.1629        | 694.2920       | 347.6496         | 693.3080       | 347.1576         | 6  |
| 6  | 683.4199  | 342.2136        | 666.3933       | 333.7003         | 665.4093       | 333.2083         | Q    | 640.2814  | 320.6443        | 623.2549       | 312.1311         | 622.2709       | 311.6391         | 5  |
| 7  | 740.4414  | 370.7243        | 723.4148       | 362.2110         | 722.4308       | 361.7190         | G    | 512.2228  | 256.6151        | 495.1963       | 248.1018         | 494.2123       | 247.6098         | 4  |
| 8  | 853.5254  | 427.2663        | 836.4989       | 418.7531         | 835.5148       | 418.2611         | L    | 455.2014  | 228.1043        | 438.1748       | 219.5911         | 437.1908       | 219.0990         | 3  |
| 9  | 1020.5238 | 510.7655        | 1003.4972      | 502.2523         | 1002.5132      | 501.7602         | S    | 342.1173  | 171.5623        | 325.0908       | 163.0490         | 324.1067       | 162.5570         | 2  |
| 10 |           |                 |                |                  |                |                  | R    | 175.1190  | 88.0631         | 158.0924       | 79.5498          |                |                  | 1  |

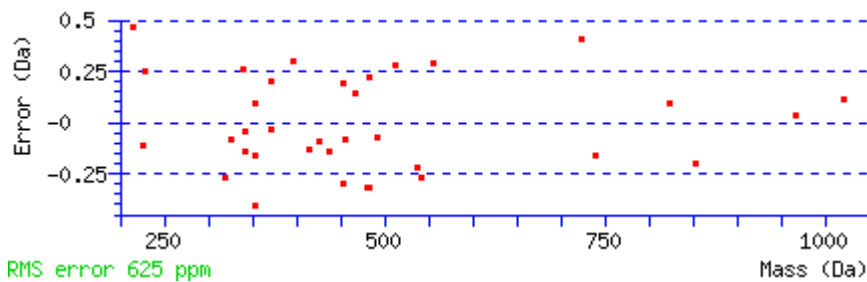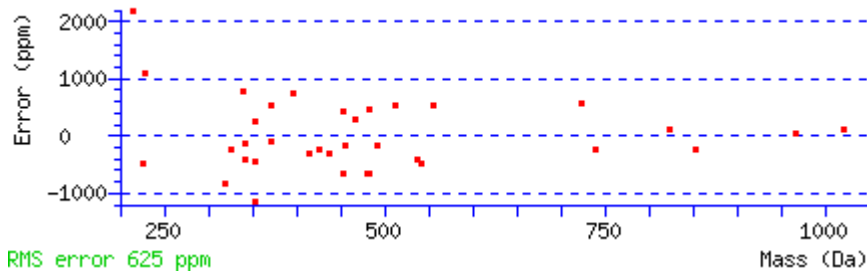

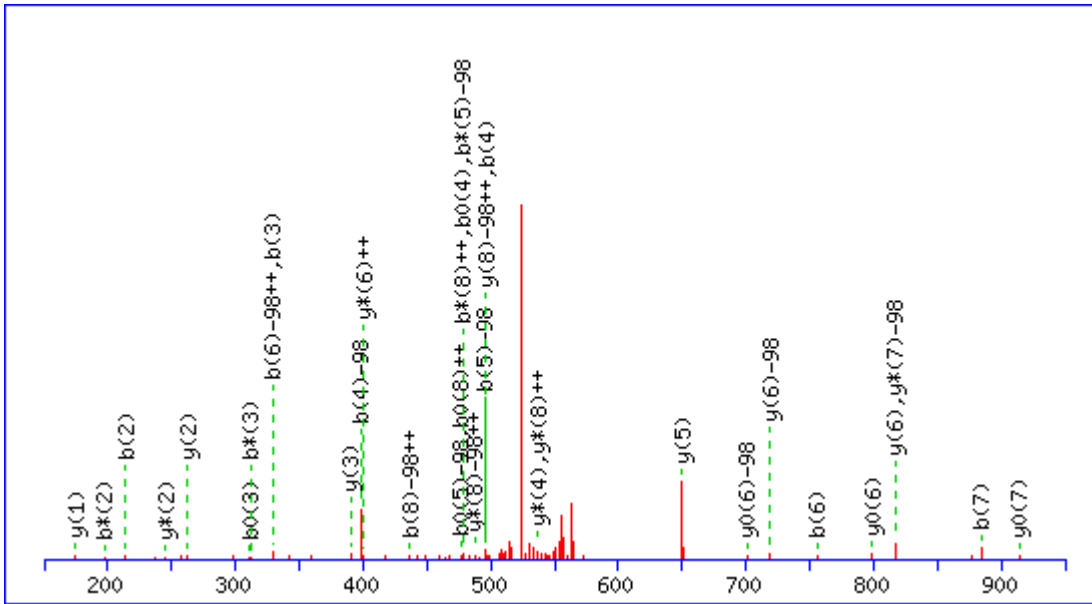

Monoisotopic mass of neutral peptide  $M_r(\text{calc})$ : 1144.4662

Fixed modifications: Carbamidomethyl (C) (apply to specified residues or termini only)

Variable modifications:

S4 : Phospho (ST), with neutral losses 97.9769 (shown in table), 0.0000

Ions Score: 35 Expect: 0.023 (help)

| # | b        | b <sup>++</sup> | b <sup>*</sup> | b <sup>+++</sup> | b <sup>0</sup> | b <sub>0++</sub> | Seq. | y        | y <sub>++</sub> | y <sup>*</sup> | y <sup>+++</sup> | y <sup>0</sup> | y <sup>0++</sup> | # |
|---|----------|-----------------|----------------|------------------|----------------|------------------|------|----------|-----------------|----------------|------------------|----------------|------------------|---|
| 1 | 58.0287  | 29.5180         |                |                  |                |                  | G    |          |                 |                |                  |                |                  | 9 |
| 2 | 214.1299 | 107.5686        | 197.1033       | 99.0553          |                |                  | R    | 990.4752 | 495.7412        | 973.4486       | 487.2279         | 972.4646       | 486.7359         | 8 |
| 3 | 329.1568 | 165.0820        | 312.1302       | 156.5688         | 311.1462       | 156.0768         | D    | 834.3741 | 417.6907        | 817.3475       | 409.1774         | 816.3635       | 408.6854         | 7 |
| 4 | 398.1783 | 199.5928        | 381.1517       | 191.0795         | 380.1677       | 190.5875         | S    | 719.3471 | 360.1772        | 702.3206       | 351.6639         | 701.3365       | 351.1719         | 6 |
| 5 | 495.2310 | 248.1191        | 478.2045       | 239.6059         | 477.2205       | 239.1139         | P    | 650.3257 | 325.6665        | 633.2991       | 317.1532         | 632.3151       | 316.6612         | 5 |
| 6 | 658.2944 | 329.6508        | 641.2678       | 321.1375         | 640.2838       | 320.6455         | Y    | 553.2729 | 277.1401        | 536.2463       | 268.6268         | 535.2623       | 268.1348         | 4 |
| 7 | 786.3529 | 393.6801        | 769.3264       | 385.1668         | 768.3424       | 384.6748         | Q    | 390.2096 | 195.6084        | 373.1830       | 187.0951         | 372.1990       | 186.6031         | 3 |
| 8 | 873.3850 | 437.1961        | 856.3584       | 428.6828         | 855.3744       | 428.1908         | S    | 262.1510 | 131.5791        | 245.1244       | 123.0659         | 244.1404       | 122.5738         | 2 |
| 9 |          |                 |                |                  |                |                  | R    | 175.1190 | 88.0631         | 158.0924       | 79.5498          |                |                  | 1 |

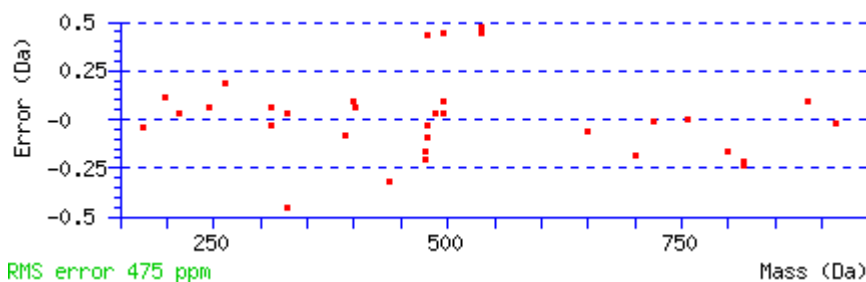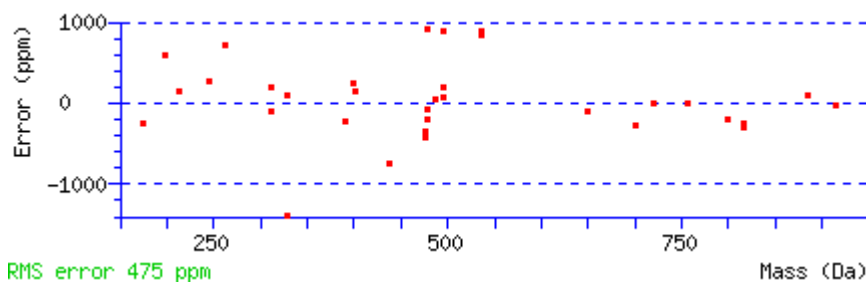

IDENTIFICATION 116

MS/MS Fragmentation of **LRSEDGVEGDLGETQSR**

Found in **IPI00553798**

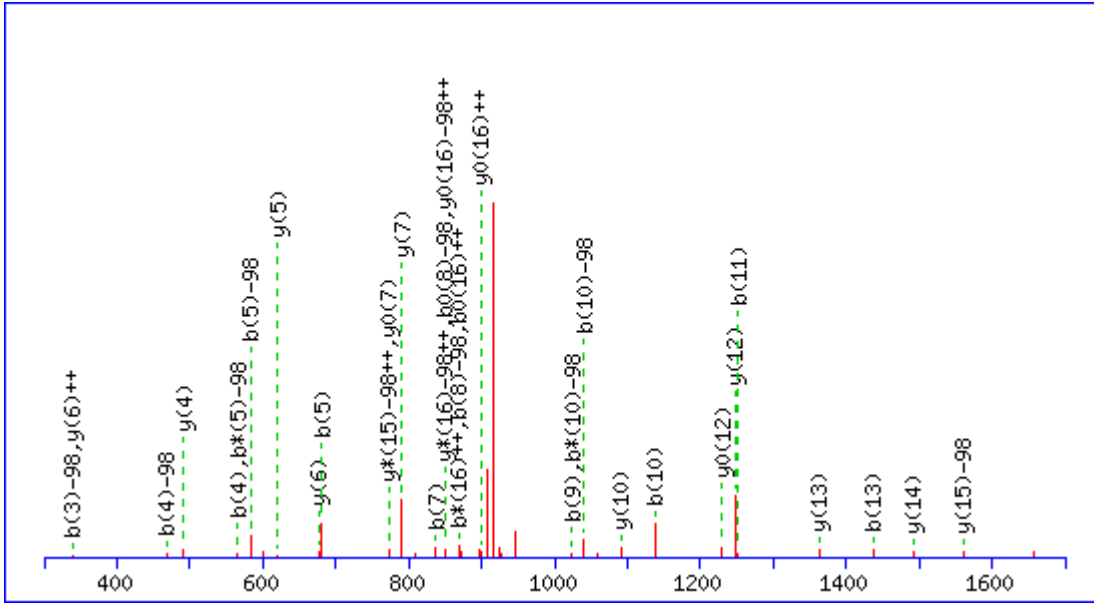

Monoisotopic mass of neutral peptide  $M_r(\text{calc})$ : 1926.8320

Fixed modifications: Carbamidomethyl (C) (apply to specified residues or termini only)

Variable modifications:

S3 : Phospho (ST), with neutral losses 97.9769 (shown in table), 0.0000

Ions Score: 70 Expect: 1.9e-05 (help)

| #  | b         | b <sup>++</sup> | b <sup>*</sup> | b <sup>+++</sup> | b <sup>0</sup> | b <sup>0++</sup> | Seq. | y         | y <sup>++</sup> | y <sup>*</sup> | y <sup>+++</sup> | y <sup>0</sup> | y <sup>0++</sup> | #  |
|----|-----------|-----------------|----------------|------------------|----------------|------------------|------|-----------|-----------------|----------------|------------------|----------------|------------------|----|
| 1  | 114.0913  | 57.5493         |                |                  |                |                  | L    |           |                 |                |                  |                |                  | 17 |
| 2  | 270.1925  | 135.5999        | 253.1659       | 127.0866         |                |                  | R    | 1716.7783 | 858.8928        | 1699.7518      | 850.3795         | 1698.7678      | 849.8875         | 16 |
| 3  | 339.2139  | 170.1106        | 322.1874       | 161.5973         | 321.2033       | 161.1053         | S    | 1560.6772 | 780.8423        | 1543.6507      | 772.3290         | 1542.6667      | 771.8370         | 15 |
| 4  | 468.2565  | 234.6319        | 451.2300       | 226.1186         | 450.2459       | 225.6266         | E    | 1491.6558 | 746.3315        | 1474.6292      | 737.8182         | 1473.6452      | 737.3262         | 14 |
| 5  | 583.2835  | 292.1454        | 566.2569       | 283.6321         | 565.2729       | 283.1401         | D    | 1362.6132 | 681.8102        | 1345.5866      | 673.2970         | 1344.6026      | 672.8049         | 13 |
| 6  | 640.3049  | 320.6561        | 623.2784       | 312.1428         | 622.2943       | 311.6508         | G    | 1247.5862 | 624.2968        | 1230.5597      | 615.7835         | 1229.5757      | 615.2915         | 12 |
| 7  | 739.3733  | 370.1903        | 722.3468       | 361.6770         | 721.3628       | 361.1850         | V    | 1190.5648 | 595.7860        | 1173.5382      | 587.2727         | 1172.5542      | 586.7807         | 11 |
| 8  | 868.4159  | 434.7116        | 851.3894       | 426.1983         | 850.4054       | 425.7063         | E    | 1091.4964 | 546.2518        | 1074.4698      | 537.7385         | 1073.4858      | 537.2465         | 10 |
| 9  | 925.4374  | 463.2223        | 908.4108       | 454.7091         | 907.4268       | 454.2170         | G    | 962.4538  | 481.7305        | 945.4272       | 473.2172         | 944.4432       | 472.7252         | 9  |
| 10 | 1040.4643 | 520.7358        | 1023.4378      | 512.2225         | 1022.4538      | 511.7305         | D    | 905.4323  | 453.2198        | 888.4058       | 444.7065         | 887.4217       | 444.2145         | 8  |
| 11 | 1153.5484 | 577.2778        | 1136.5218      | 568.7646         | 1135.5378      | 568.2726         | L    | 790.4054  | 395.7063        | 773.3788       | 387.1930         | 772.3948       | 386.7010         | 7  |
| 12 | 1210.5699 | 605.7886        | 1193.5433      | 597.2753         | 1192.5593      | 596.7833         | G    | 677.3213  | 339.1643        | 660.2947       | 330.6510         | 659.3107       | 330.1590         | 6  |
| 13 | 1339.6124 | 670.3099        | 1322.5859      | 661.7966         | 1321.6019      | 661.3046         | E    | 620.2998  | 310.6536        | 603.2733       | 302.1403         | 602.2893       | 301.6483         | 5  |
| 14 | 1440.6601 | 720.8337        | 1423.6336      | 712.3204         | 1422.6496      | 711.8284         | T    | 491.2572  | 246.1323        | 474.2307       | 237.6190         | 473.2467       | 237.1270         | 4  |
| 15 | 1568.7187 | 784.8630        | 1551.6922      | 776.3497         | 1550.7081      | 775.8577         | Q    | 390.2096  | 195.6084        | 373.1830       | 187.0951         | 372.1990       | 186.6031         | 3  |
| 16 | 1655.7507 | 828.3790        | 1638.7242      | 819.8657         | 1637.7402      | 819.3737         | S    | 262.1510  | 131.5791        | 245.1244       | 123.0659         | 244.1404       | 122.5738         | 2  |
| 17 |           |                 |                |                  |                |                  | R    | 175.1190  | 88.0631         | 158.0924       | 79.5498          |                |                  | 1  |



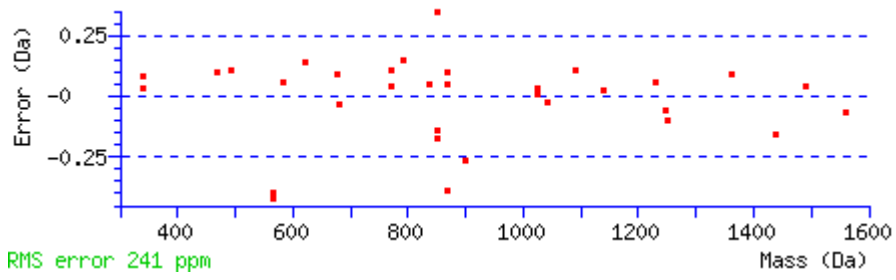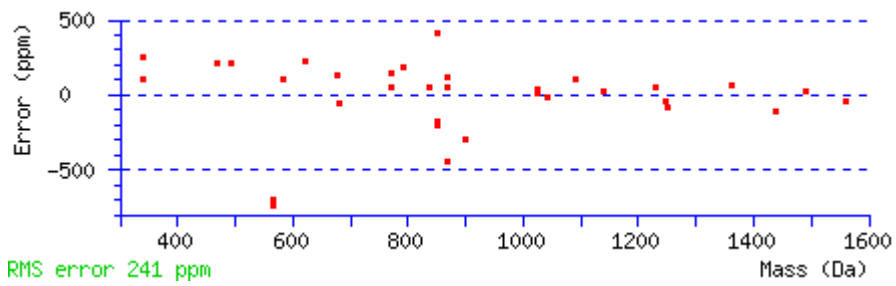

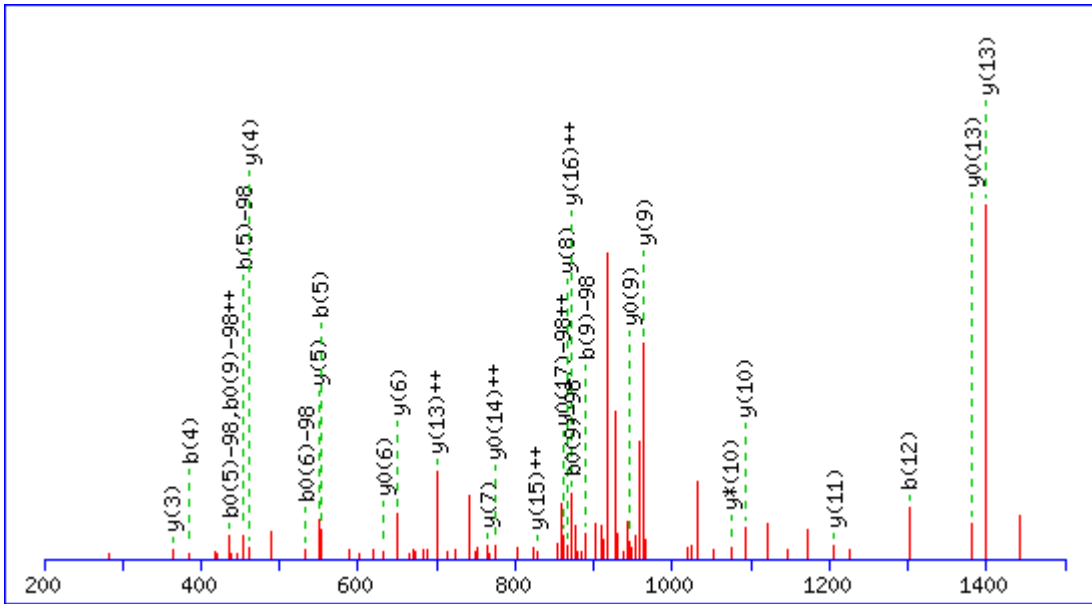

Monoisotopic mass of neutral peptide  $M_r(\text{calc})$ : 1949.8983 Fixed modifications: Carbamidomethyl (C) (apply to specified residues or termini only) Variable modifications: S5 : Phospho (ST), with neutral losses 97.9769 (shown in table), 0.0000 Ions Score: 39 Expect: 0.024 (help)

| #  | b         | b <sup>++</sup> | b <sup>0</sup> | b <sup>0++</sup> | Seq. | y         | y <sup>++</sup> | y <sup>*</sup> | y <sup>+++</sup> | y <sup>0</sup> | y <sup>0++</sup> | #  |
|----|-----------|-----------------|----------------|------------------|------|-----------|-----------------|----------------|------------------|----------------|------------------|----|
| 1  | 114.0913  | 57.5493         |                |                  | L    |           |                 |                |                  |                |                  | 18 |
| 2  | 211.1441  | 106.0757        |                |                  | P    | 1739.8446 | 870.4260        | 1722.8181      | 861.9127         | 1721.8341      | 861.4207         | 17 |
| 3  | 298.1761  | 149.5917        | 280.1656       | 140.5864         | S    | 1642.7919 | 821.8996        | 1625.7653      | 813.3863         | 1624.7813      | 812.8943         | 16 |
| 4  | 385.2082  | 193.1077        | 367.1976       | 184.1024         | S    | 1555.7598 | 778.3836        | 1538.7333      | 769.8703         | 1537.7493      | 769.3783         | 15 |
| 5  | 454.2296  | 227.6184        | 436.2191       | 218.6132         | S    | 1468.7278 | 734.8675        | 1451.7013      | 726.3543         | 1450.7172      | 725.8623         | 14 |
| 6  | 551.2824  | 276.1448        | 533.2718       | 267.1395         | P    | 1399.7064 | 700.3568        | 1382.6798      | 691.8435         | 1381.6958      | 691.3515         | 13 |
| 7  | 648.3352  | 324.6712        | 630.3246       | 315.6659         | P    | 1302.6536 | 651.8304        | 1285.6270      | 643.3172         | 1284.6430      | 642.8251         | 12 |
| 8  | 761.4192  | 381.2132        | 743.4086       | 372.2080         | L    | 1205.6008 | 603.3040        | 1188.5743      | 594.7908         | 1187.5903      | 594.2988         | 11 |
| 9  | 890.4618  | 445.7345        | 872.4512       | 436.7293         | E    | 1092.5168 | 546.7620        | 1075.4902      | 538.2487         | 1074.5062      | 537.7567         | 10 |
| 10 | 987.5146  | 494.2609        | 969.5040       | 485.2556         | P    | 963.4742  | 482.2407        | 946.4476       | 473.7274         | 945.4636       | 473.2354         | 9  |
| 11 | 1088.5623 | 544.7848        | 1070.5517      | 535.7795         | T    | 866.4214  | 433.7143        | 849.3949       | 425.2011         | 848.4108       | 424.7091         | 8  |
| 12 | 1203.5892 | 602.2982        | 1185.5786      | 593.2930         | D    | 765.3737  | 383.1905        | 748.3472       | 374.6772         | 747.3632       | 374.1852         | 7  |
| 13 | 1304.6369 | 652.8221        | 1286.6263      | 643.8168         | T    | 650.3468  | 325.6770        | 633.3202       | 317.1638         | 632.3362       | 316.6717         | 6  |
| 14 | 1391.6689 | 696.3381        | 1373.6583      | 687.3328         | S    | 549.2991  | 275.1532        | 532.2726       | 266.6399         | 531.2885       | 266.1479         | 5  |
| 15 | 1490.7373 | 745.8723        | 1472.7268      | 736.8670         | V    | 462.2671  | 231.6372        | 445.2405       | 223.1239         | 444.2565       | 222.6319         | 4  |
| 16 | 1591.7850 | 796.3961        | 1573.7744      | 787.3909         | T    | 363.1987  | 182.1030        | 346.1721       | 173.5897         | 345.1881       | 173.0977         | 3  |
| 17 | 1678.8170 | 839.9121        | 1660.8065      | 830.9069         | S    | 262.1510  | 131.5791        | 245.1244       | 123.0659         | 244.1404       | 122.5738         | 2  |
| 18 |           |                 |                |                  | R    | 175.1190  | 88.0631         | 158.0924       | 79.5498          |                |                  | 1  |

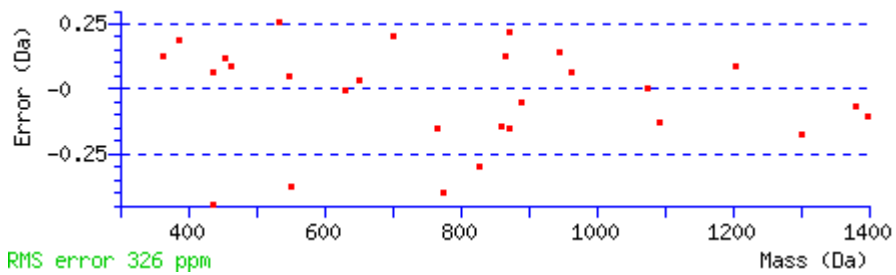

RMS error 326 ppm

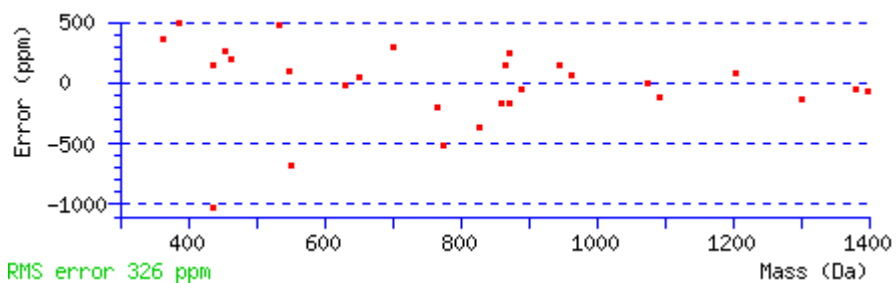

RMS error 326 ppm

IDENTIFICATION 118

MS/MS Fragmentation of **SDAEEDGVTGSQDEEDSKPK**

Found in **IPI00119618**

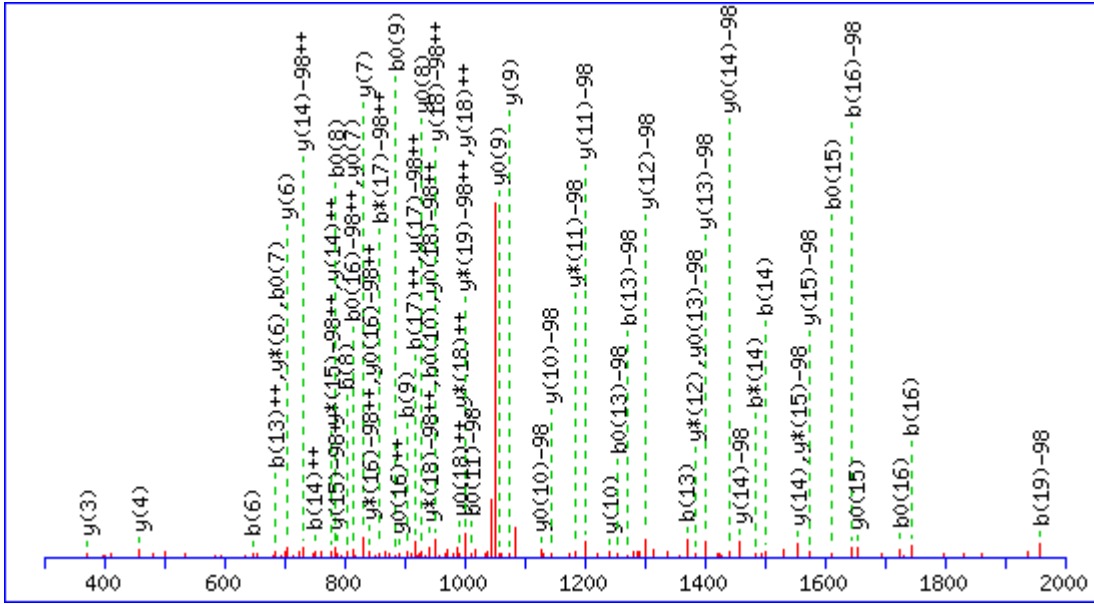

Monoisotopic mass of neutral peptide Mr(calc): 2201.8485

Fixed modifications: Carbamidomethyl (C) (apply to specified residues or termini only)

Variable modifications:

S11 : Phospho (ST), with neutral losses 97.9769 (shown in table), 0.0000

Ions Score: 57 Expect: 0.00034 (help)

| #  | b         | b <sup>++</sup> | b <sup>*</sup> | b <sup>+++</sup> | b <sub>0</sub> | b <sup>0++</sup> | Seq. | y         | y <sup>++</sup> | y <sup>*</sup> | y <sup>+++</sup> | y <sup>0</sup> | y <sup>0++</sup> | #  |
|----|-----------|-----------------|----------------|------------------|----------------|------------------|------|-----------|-----------------|----------------|------------------|----------------|------------------|----|
| 1  | 88.0393   | 44.5233         |                |                  | 70.0287        | 35.5180          | S    |           |                 |                |                  |                |                  | 20 |
| 2  | 203.0662  | 102.0368        |                |                  | 185.0557       | 93.0315          | D    | 2017.8469 | 1009.4271       | 2000.8203      | 1000.9138        | 1999.8363      | 1000.4218        | 19 |
| 3  | 274.1034  | 137.5553        |                |                  | 256.0928       | 128.5500         | A    | 1902.8199 | 951.9136        | 1885.7934      | 943.4003         | 1884.8094      | 942.9083         | 18 |
| 4  | 403.1460  | 202.0766        |                |                  | 385.1354       | 193.0713         | E    | 1831.7828 | 916.3950        | 1814.7563      | 907.8818         | 1813.7723      | 907.3898         | 17 |
| 5  | 532.1885  | 266.5979        |                |                  | 514.1780       | 257.5926         | E    | 1702.7402 | 851.8738        | 1685.7137      | 843.3605         | 1684.7297      | 842.8685         | 16 |
| 6  | 647.2155  | 324.1114        |                |                  | 629.2049       | 315.1061         | D    | 1573.6976 | 787.3525        | 1556.6711      | 778.8392         | 1555.6871      | 778.3472         | 15 |
| 7  | 704.2370  | 352.6221        |                |                  | 686.2264       | 343.6168         | G    | 1458.6707 | 729.8390        | 1441.6441      | 721.3257         | 1440.6601      | 720.8337         | 14 |
| 8  | 803.3054  | 402.1563        |                |                  | 785.2948       | 393.1510         | V    | 1401.6492 | 701.3283        | 1384.6227      | 692.8150         | 1383.6387      | 692.3230         | 13 |
| 9  | 904.3530  | 452.6802        |                |                  | 886.3425       | 443.6749         | T    | 1302.5808 | 651.7940        | 1285.5543      | 643.2808         | 1284.5703      | 642.7888         | 12 |
| 10 | 961.3745  | 481.1909        |                |                  | 943.3639       | 472.1856         | G    | 1201.5331 | 601.2702        | 1184.5066      | 592.7569         | 1183.5226      | 592.2649         | 11 |
| 11 | 1030.3960 | 515.7016        |                |                  | 1012.3854      | 506.6963         | S    | 1144.5117 | 572.7595        | 1127.4851      | 564.2462         | 1126.5011      | 563.7542         | 10 |
| 12 | 1158.4546 | 579.7309        | 1141.4280      | 571.2176         | 1140.4440      | 570.7256         | Q    | 1075.4902 | 538.2487        | 1058.4637      | 529.7355         | 1057.4796      | 529.2435         | 9  |
| 13 | 1273.4815 | 637.2444        | 1256.4549      | 628.7311         | 1255.4709      | 628.2391         | D    | 947.4316  | 474.2195        | 930.4051       | 465.7062         | 929.4211       | 465.2142         | 8  |
| 14 | 1402.5241 | 701.7657        | 1385.4975      | 693.2524         | 1384.5135      | 692.7604         | E    | 832.4047  | 416.7060        | 815.3781       | 408.1927         | 814.3941       | 407.7007         | 7  |
| 15 | 1531.5667 | 766.2870        | 1514.5401      | 757.7737         | 1513.5561      | 757.2817         | E    | 703.3621  | 352.1847        | 686.3355       | 343.6714         | 685.3515       | 343.1794         | 6  |
| 16 | 1646.5936 | 823.8005        | 1629.5671      | 815.2872         | 1628.5831      | 814.7952         | D    | 574.3195  | 287.6634        | 557.2930       | 279.1501         | 556.3089       | 278.6581         | 5  |
| 17 | 1733.6257 | 867.3165        | 1716.5991      | 858.8032         | 1715.6151      | 858.3112         | S    | 459.2926  | 230.1499        | 442.2660       | 221.6366         | 441.2820       | 221.1446         | 4  |
| 18 | 1861.7206 | 931.3639        | 1844.6941      | 922.8507         | 1843.7101      | 922.3587         | K    | 372.2605  | 186.6339        | 355.2340       | 178.1206         |                |                  | 3  |
| 19 | 1958.7734 | 979.8903        | 1941.7468      | 971.3771         | 1940.7628      | 970.8850         | P    | 244.1656  | 122.5864        | 227.1390       | 114.0731         |                |                  | 2  |
| 20 |           |                 |                |                  |                |                  | K    | 147.1128  | 74.0600         | 130.0863       | 65.5468          |                |                  | 1  |

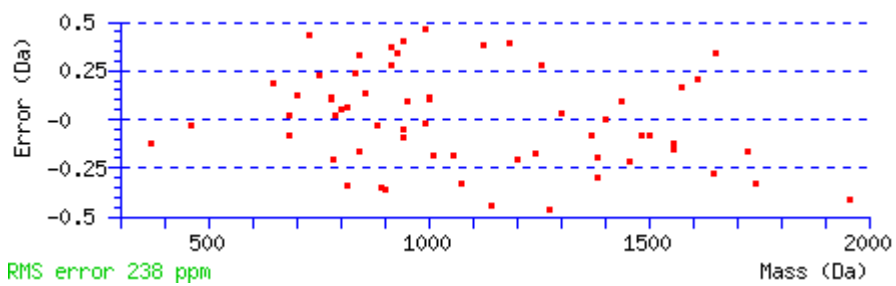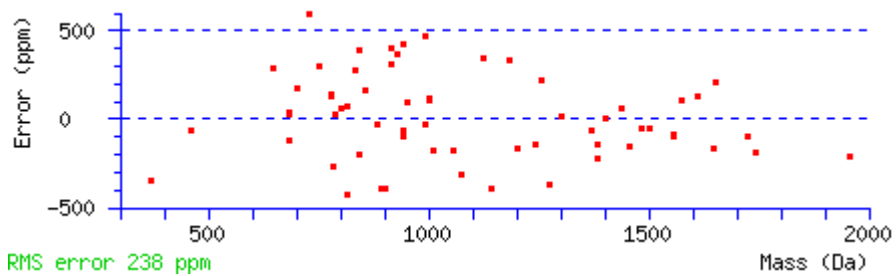

IDENTIFICATION 119

MS/MS Fragmentation of **NEKSEEEQSSASVK**

Found in **IPI00130343**

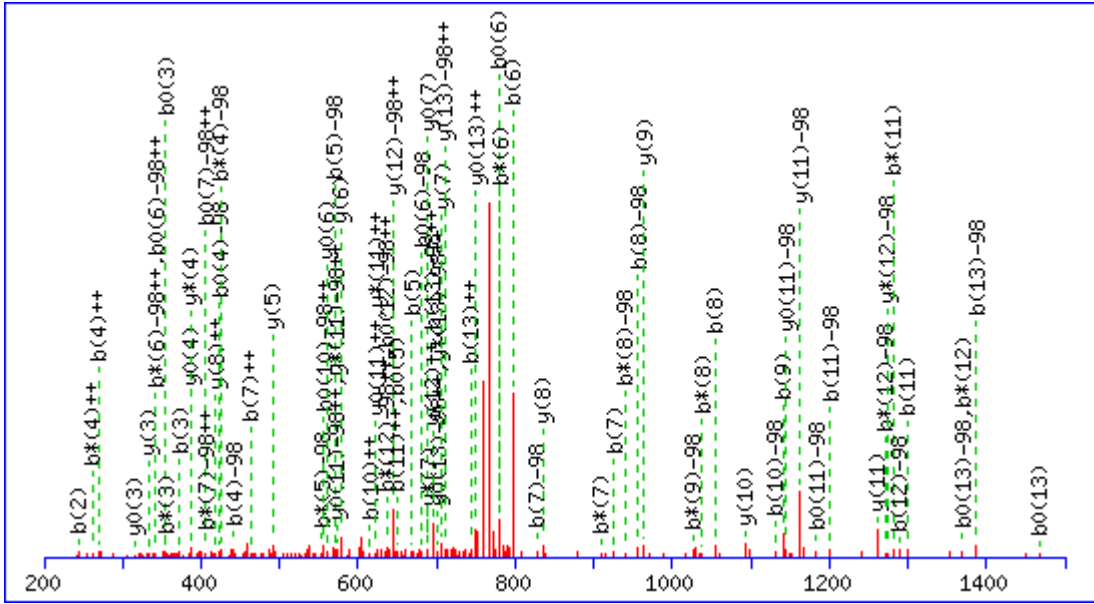

Monoisotopic mass of neutral peptide  $M_r(\text{calc})$ : 1630.6723 Fixed modifications: Carbamidomethyl (C) (apply to specified residues or termini only) Variable modifications: S4 : Phospho (ST), with neutral losses 97.9769 (shown in table), 0.0000 Ions Score: 46 Expect: 0.0033 (help)

| #  | b         | b <sup>++</sup> | b <sup>*</sup> | b <sup>+++</sup> | b <sup>0</sup> | b <sup>0++</sup> | Seq. | y         | y <sup>++</sup> | y <sup>*</sup> | y <sup>+++</sup> | y <sub>0</sub> | y <sup>0++</sup> | #  |
|----|-----------|-----------------|----------------|------------------|----------------|------------------|------|-----------|-----------------|----------------|------------------|----------------|------------------|----|
| 1  | 115.0502  | 58.0287         | 98.0237        | 49.5155          |                |                  | N    |           |                 |                |                  |                |                  | 14 |
| 2  | 244.0928  | 122.5500        | 227.0662       | 114.0368         | 226.0822       | 113.5448         | E    | 1419.6598 | 710.3335        | 1402.6332      | 701.8203         | 1401.6492      | 701.3283         | 13 |
| 3  | 372.1878  | 186.5975        | 355.1612       | 178.0842         | 354.1772       | 177.5922         | K    | 1290.6172 | 645.8122        | 1273.5907      | 637.2990         | 1272.6066      | 636.8070         | 12 |
| 4  | 441.2092  | 221.1082        | 424.1827       | 212.5950         | 423.1987       | 212.1030         | S    | 1162.5222 | 581.7648        | 1145.4957      | 573.2515         | 1144.5117      | 572.7595         | 11 |
| 5  | 570.2518  | 285.6295        | 553.2253       | 277.1163         | 552.2413       | 276.6243         | E    | 1093.5008 | 547.2540        | 1076.4742      | 538.7408         | 1075.4902      | 538.2487         | 10 |
| 6  | 699.2944  | 350.1508        | 682.2679       | 341.6376         | 681.2838       | 341.1456         | E    | 964.4582  | 482.7327        | 947.4316       | 474.2195         | 946.4476       | 473.7274         | 9  |
| 7  | 828.3370  | 414.6721        | 811.3105       | 406.1589         | 810.3264       | 405.6669         | E    | 835.4156  | 418.2114        | 818.3890       | 409.6982         | 817.4050       | 409.2061         | 8  |
| 8  | 956.3956  | 478.7014        | 939.3690       | 470.1882         | 938.3850       | 469.6961         | Q    | 706.3730  | 353.6901        | 689.3464       | 345.1769         | 688.3624       | 344.6849         | 7  |
| 9  | 1043.4276 | 522.2174        | 1026.4011      | 513.7042         | 1025.4170      | 513.2122         | S    | 578.3144  | 289.6608        | 561.2879       | 281.1476         | 560.3039       | 280.6556         | 6  |
| 10 | 1130.4596 | 565.7335        | 1113.4331      | 557.2202         | 1112.4491      | 556.7282         | S    | 491.2824  | 246.1448        | 474.2558       | 237.6316         | 473.2718       | 237.1395         | 5  |
| 11 | 1201.4967 | 601.2520        | 1184.4702      | 592.7387         | 1183.4862      | 592.2467         | A    | 404.2504  | 202.6288        | 387.2238       | 194.1155         | 386.2398       | 193.6235         | 4  |
| 12 | 1288.5288 | 644.7680        | 1271.5022      | 636.2548         | 1270.5182      | 635.7627         | S    | 333.2132  | 167.1103        | 316.1867       | 158.5970         | 315.2027       | 158.1050         | 3  |
| 13 | 1387.5972 | 694.3022        | 1370.5706      | 685.7890         | 1369.5866      | 685.2970         | V    | 246.1812  | 123.5942        | 229.1547       | 115.0810         |                |                  | 2  |
| 14 |           |                 |                |                  |                |                  | K    | 147.1128  | 74.0600         | 130.0863       | 65.5468          |                |                  | 1  |

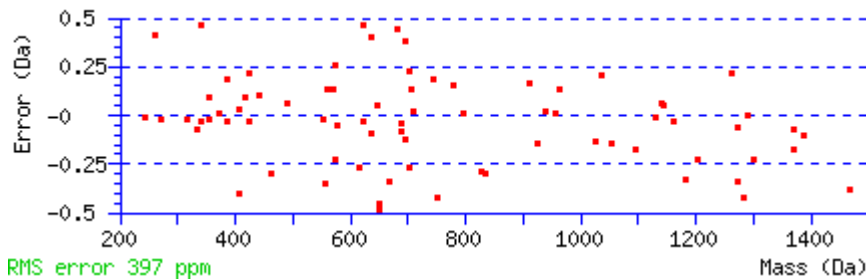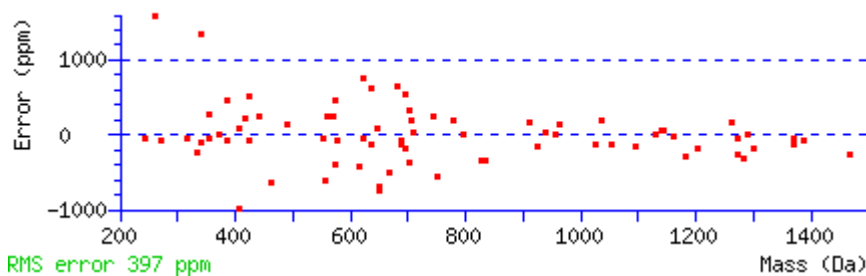

IDENTIFICATION 120

MS/MS Fragmentation of **SKSEEHAEDSVMDHFR**  
 Found in **IPI00471475**

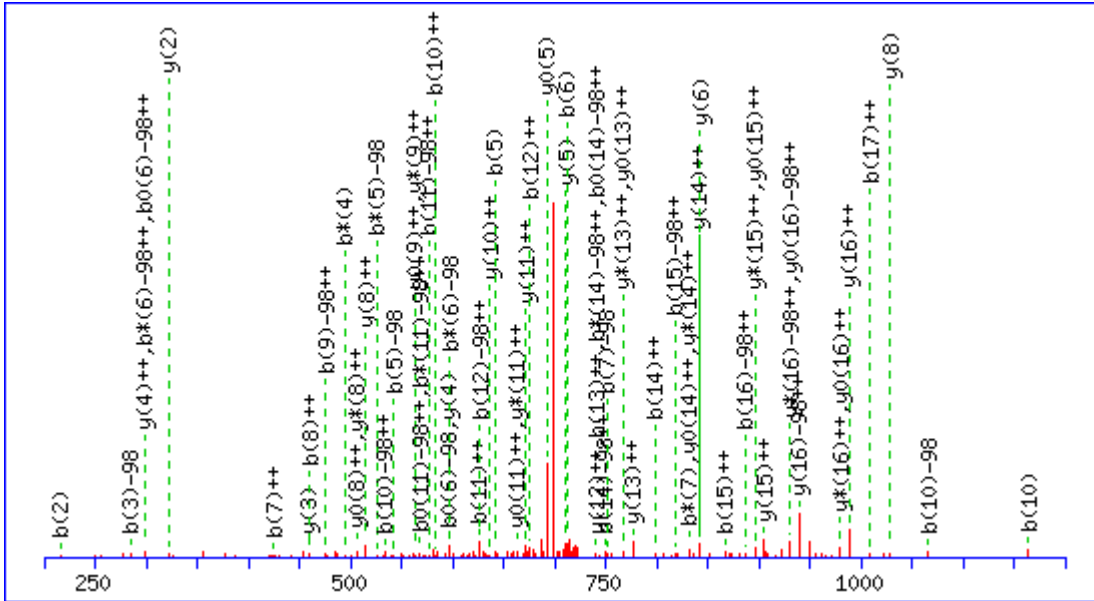

Monoisotopic mass of neutral peptide Mr(calc): 2190.8790 Fixed modifications: Carbamidomethyl (C) (apply to specified residues or termini only) Variable modifications: S3 : Phospho (ST), with neutral losses 97.9769 (shown in table), 0.0000 Ions Score: 32 Expect: 0.12 (help)

| #  | b         | b <sup>++</sup> | b <sup>*</sup> | b <sup>+++</sup> | b <sup>0</sup> | b <sup>0++</sup> | Seq. | y         | y <sup>++</sup> | y <sup>*</sup> | y <sup>+++</sup> | y <sup>0</sup> | y <sup>0++</sup> | #  |
|----|-----------|-----------------|----------------|------------------|----------------|------------------|------|-----------|-----------------|----------------|------------------|----------------|------------------|----|
| 1  | 88.0393   | 44.5233         |                |                  | 70.0287        | 35.5180          | S    |           |                 |                |                  |                |                  | 18 |
| 2  | 216.1343  | 108.5708        | 199.1077       | 100.0575         | 198.1237       | 99.5655          | K    | 2006.8773 | 1003.9423       | 1989.8508      | 995.4290         | 1988.8668      | 994.9370         | 17 |
| 3  | 285.1557  | 143.0815        | 268.1292       | 134.5682         | 267.1452       | 134.0762         | S    | 1878.7824 | 939.8948        | 1861.7558      | 931.3816         | 1860.7718      | 930.8895         | 16 |
| 4  | 414.1983  | 207.6028        | 397.1718       | 199.0895         | 396.1878       | 198.5975         | E    | 1809.7609 | 905.3841        | 1792.7344      | 896.8708         | 1791.7504      | 896.3788         | 15 |
| 5  | 543.2409  | 272.1241        | 526.2144       | 263.6108         | 525.2304       | 263.1188         | E    | 1680.7183 | 840.8628        | 1663.6918      | 832.3495         | 1662.7078      | 831.8575         | 14 |
| 6  | 614.2780  | 307.6427        | 597.2515       | 299.1294         | 596.2675       | 298.6374         | A    | 1551.6757 | 776.3415        | 1534.6492      | 767.8282         | 1533.6652      | 767.3362         | 13 |
| 7  | 751.3369  | 376.1721        | 734.3104       | 367.6588         | 733.3264       | 367.1668         | H    | 1480.6386 | 740.8229        | 1463.6121      | 732.3097         | 1462.6281      | 731.8177         | 12 |
| 8  | 822.3741  | 411.6907        | 805.3475       | 403.1774         | 804.3635       | 402.6854         | A    | 1343.5797 | 672.2935        | 1326.5532      | 663.7802         | 1325.5691      | 663.2882         | 11 |
| 9  | 951.4166  | 476.2120        | 934.3901       | 467.6987         | 933.4061       | 467.2067         | E    | 1272.5426 | 636.7749        | 1255.5160      | 628.2617         | 1254.5320      | 627.7697         | 10 |
| 10 | 1066.4436 | 533.7254        | 1049.4170      | 525.2122         | 1048.4330      | 524.7202         | D    | 1143.5000 | 572.2536        | 1126.4735      | 563.7404         | 1125.4894      | 563.2484         | 9  |
| 11 | 1153.4756 | 577.2414        | 1136.4491      | 568.7282         | 1135.4651      | 568.2362         | S    | 1028.4731 | 514.7402        | 1011.4465      | 506.2269         | 1010.4625      | 505.7349         | 8  |
| 12 | 1252.5440 | 626.7757        | 1235.5175      | 618.2624         | 1234.5335      | 617.7704         | V    | 941.4410  | 471.2242        | 924.4145       | 462.7109         | 923.4305       | 462.2189         | 7  |
| 13 | 1383.5845 | 692.2959        | 1366.5580      | 683.7826         | 1365.5740      | 683.2906         | M    | 842.3726  | 421.6899        | 825.3461       | 413.1767         | 824.3621       | 412.6847         | 6  |
| 14 | 1498.6115 | 749.8094        | 1481.5849      | 741.2961         | 1480.6009      | 740.8041         | D    | 711.3321  | 356.1697        | 694.3056       | 347.6564         | 693.3216       | 347.1644         | 5  |
| 15 | 1635.6704 | 818.3388        | 1618.6438      | 809.8256         | 1617.6598      | 809.3335         | H    | 596.3052  | 298.6562        | 579.2786       | 290.1430         |                |                  | 4  |
| 16 | 1772.7293 | 886.8683        | 1755.7027      | 878.3550         | 1754.7187      | 877.8630         | H    | 459.2463  | 230.1268        | 442.2197       | 221.6135         |                |                  | 3  |
| 17 | 1919.7977 | 960.4025        | 1902.7712      | 951.8892         | 1901.7871      | 951.3972         | F    | 322.1874  | 161.5973        | 305.1608       | 153.0840         |                |                  | 2  |
| 18 |           |                 |                |                  |                |                  | R    | 175.1190  | 88.0631         | 158.0924       | 79.5498          |                |                  | 1  |

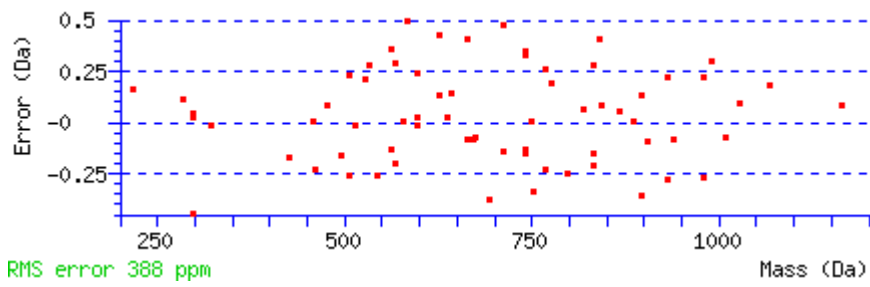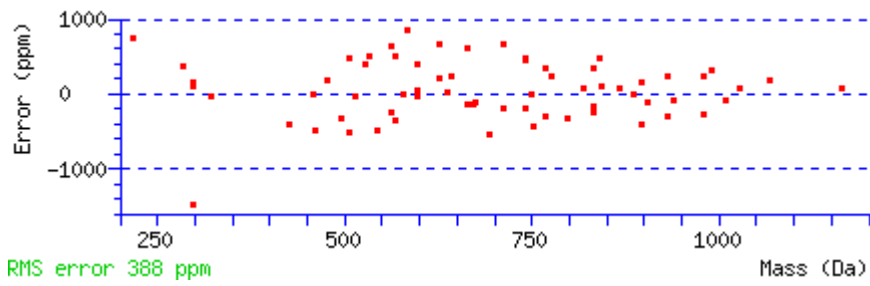



IDENTIFICATION 121

MS/MS Fragmentation of **DSVPASPGVPAADFFPAETEQSKPSK**

Found in **IPI00122223**

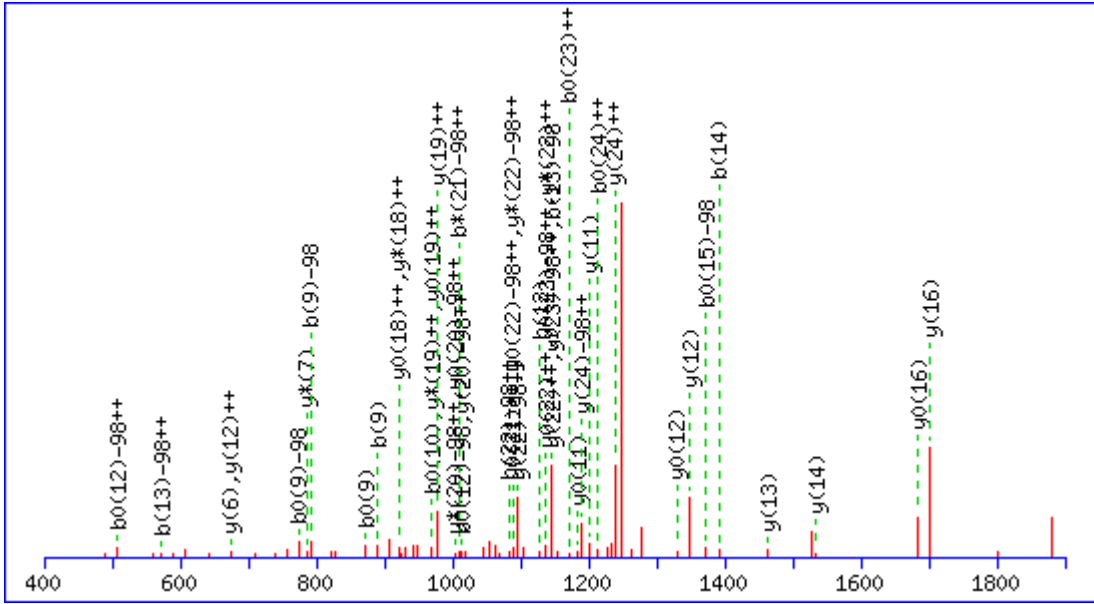

Monoisotopic mass of neutral peptide Mr(calc): 2591.1792

Fixed modifications: Carbamidomethyl (C) (apply to specified residues or termini only)

Variable modifications:

S6 : Phospho (ST), with neutral losses 97.9769 (shown in table), 0.0000

Ions Score: 27 Expect: 0.38 (help)

| #  | b         | b <sup>++</sup> | b <sup>*</sup> | b <sup>+++</sup> | b <sup>0</sup> | b <sup>0++</sup> | Seq. | y         | y <sup>++</sup> | y <sup>*</sup> | y <sup>+++</sup> | y <sup>0</sup> | y <sup>0++</sup> | #  |
|----|-----------|-----------------|----------------|------------------|----------------|------------------|------|-----------|-----------------|----------------|------------------|----------------|------------------|----|
| 1  | 116.0342  | 58.5207         |                |                  | 98.0237        | 49.5155          | D    |           |                 |                |                  |                |                  | 25 |
| 2  | 203.0662  | 102.0368        |                |                  | 185.0557       | 93.0315          | S    | 2379.1827 | 1190.0950       | 2362.1561      | 1181.5817        | 2361.1721      | 1181.0897        | 24 |
| 3  | 302.1347  | 151.5710        |                |                  | 284.1241       | 142.5657         | V    | 2292.1507 | 1146.5790       | 2275.1241      | 1138.0657        | 2274.1401      | 1137.5737        | 23 |
| 4  | 399.1874  | 200.0974        |                |                  | 381.1769       | 191.0921         | P    | 2193.0822 | 1097.0448       | 2176.0557      | 1088.5315        | 2175.0717      | 1088.0395        | 22 |
| 5  | 470.2245  | 235.6159        |                |                  | 452.2140       | 226.6106         | A    | 2096.0295 | 1048.5184       | 2079.0029      | 1040.0051        | 2078.0189      | 1039.5131        | 21 |
| 6  | 539.2460  | 270.1266        |                |                  | 521.2354       | 261.1214         | S    | 2024.9924 | 1012.9998       | 2007.9658      | 1004.4865        | 2006.9818      | 1003.9945        | 20 |
| 7  | 636.2988  | 318.6530        |                |                  | 618.2882       | 309.6477         | P    | 1955.9709 | 978.4891        | 1938.9444      | 969.9758         | 1937.9603      | 969.4838         | 19 |
| 8  | 693.3202  | 347.1638        |                |                  | 675.3097       | 338.1585         | G    | 1858.9181 | 929.9627        | 1841.8916      | 921.4494         | 1840.9076      | 920.9574         | 18 |
| 9  | 792.3886  | 396.6980        |                |                  | 774.3781       | 387.6927         | V    | 1801.8967 | 901.4520        | 1784.8701      | 892.9387         | 1783.8861      | 892.4467         | 17 |
| 10 | 889.4414  | 445.2243        |                |                  | 871.4308       | 436.2191         | P    | 1702.8283 | 851.9178        | 1685.8017      | 843.4045         | 1684.8177      | 842.9125         | 16 |
| 11 | 960.4785  | 480.7429        |                |                  | 942.4680       | 471.7376         | A    | 1605.7755 | 803.3914        | 1588.7489      | 794.8781         | 1587.7649      | 794.3861         | 15 |
| 12 | 1031.5156 | 516.2615        |                |                  | 1013.5051      | 507.2562         | A    | 1534.7384 | 767.8728        | 1517.7118      | 759.3596         | 1516.7278      | 758.8675         | 14 |
| 13 | 1146.5426 | 573.7749        |                |                  | 1128.5320      | 564.7696         | D    | 1463.7013 | 732.3543        | 1446.6747      | 723.8410         | 1445.6907      | 723.3490         | 13 |
| 14 | 1293.6110 | 647.3091        |                |                  | 1275.6004      | 638.3039         | F    | 1348.6743 | 674.8408        | 1331.6478      | 666.3275         | 1330.6638      | 665.8355         | 12 |
| 15 | 1390.6638 | 695.8355        |                |                  | 1372.6532      | 686.8302         | P    | 1201.6059 | 601.3066        | 1184.5794      | 592.7933         | 1183.5953      | 592.3013         | 11 |
| 16 | 1461.7009 | 731.3541        |                |                  | 1443.6903      | 722.3488         | A    | 1104.5531 | 552.7802        | 1087.5266      | 544.2669         | 1086.5426      | 543.7749         | 10 |
| 17 | 1590.7435 | 795.8754        |                |                  | 1572.7329      | 786.8701         | E    | 1033.5160 | 517.2617        | 1016.4895      | 508.7484         | 1015.5055      | 508.2564         | 9  |
| 18 | 1691.7911 | 846.3992        |                |                  | 1673.7806      | 837.3939         | T    | 904.4734  | 452.7404        | 887.4469       | 444.2271         | 886.4629       | 443.7351         | 8  |
| 19 | 1820.8337 | 910.9205        |                |                  | 1802.8232      | 901.9152         | E    | 803.4258  | 402.2165        | 786.3992       | 393.7032         | 785.4152       | 393.2112         | 7  |
| 20 | 1948.8923 | 974.9498        | 1931.8658      | 966.4365         | 1930.8817      | 965.9445         | Q    | 674.3832  | 337.6952        | 657.3566       | 329.1819         | 656.3726       | 328.6899         | 6  |
| 21 | 2035.9243 | 1018.4658       | 2018.8978      | 1009.9525        | 2017.9138      | 1009.4605        | S    | 546.3246  | 273.6659        | 529.2980       | 265.1527         | 528.3140       | 264.6606         | 5  |
| 22 | 2164.0193 | 1082.5133       | 2146.9928      | 1074.0000        | 2146.0087      | 1073.5080        | K    | 459.2926  | 230.1499        | 442.2660       | 221.6366         | 441.2820       | 221.1446         | 4  |
| 23 | 2261.0721 | 1131.0397       | 2244.0455      | 1122.5264        | 2243.0615      | 1122.0344        | P    | 331.1976  | 166.1024        | 314.1710       | 157.5892         | 313.1870       | 157.0972         | 3  |
| 24 | 2348.1041 | 1174.5557       | 2331.0775      | 1166.0424        | 2330.0935      | 1165.5504        | S    | 234.1448  | 117.5761        | 217.1183       | 109.0628         | 216.1343       | 108.5708         | 2  |
| 25 |           |                 |                |                  |                |                  | K    | 147.1128  | 74.0600         | 130.0863       | 65.5468          |                |                  | 1  |

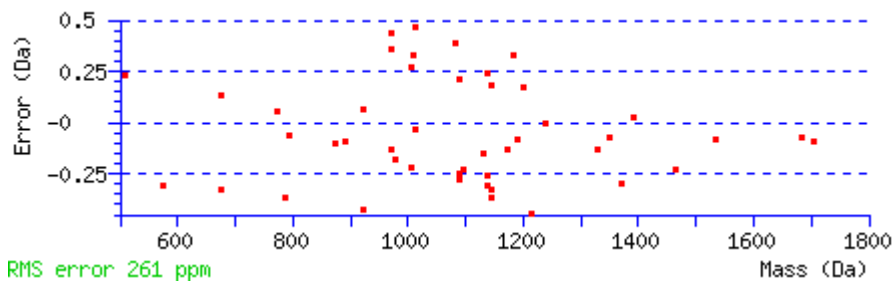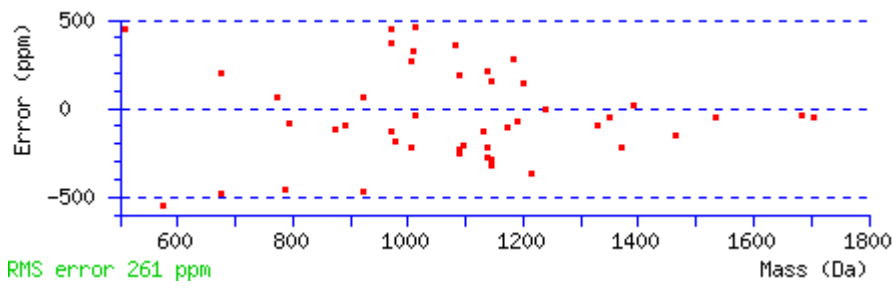

IDENTIFICATION 122

MS/MS Fragmentation of LTKQMNAIIDTVINYK

Found in IPI00460549

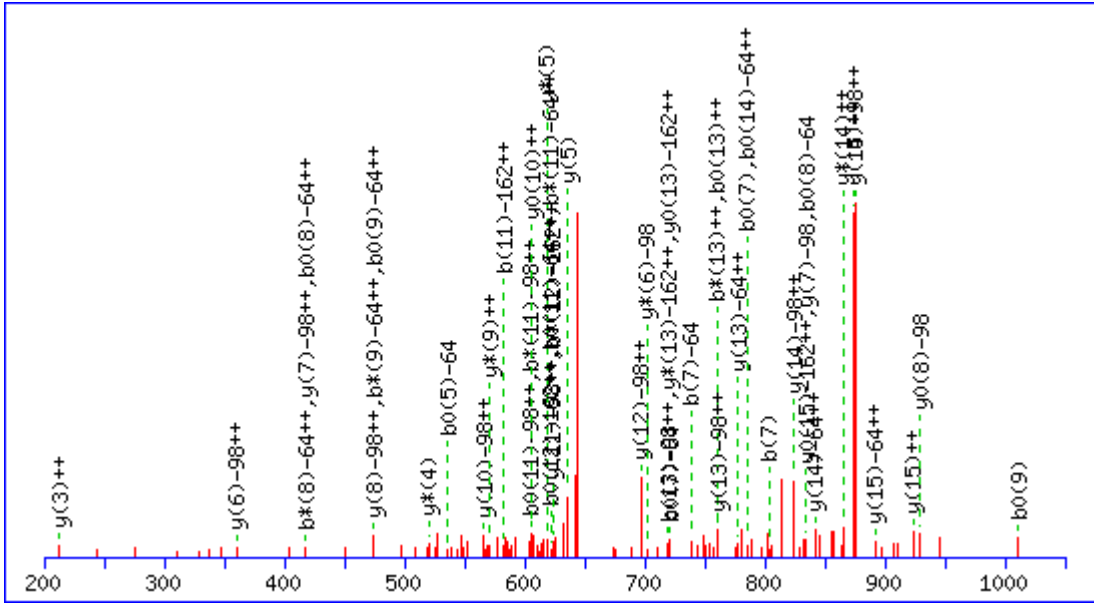

Monoisotopic mass of neutral peptide Mr(calc): 1959.9740 Fixed modifications: Carbamidomethyl (C) (apply to specified residues or termini only) Variable modifications: M5 : Oxidation (M), with neutral losses 0.0000(shown in table), 63.9983 T11 : Phospho (ST), with neutral losses 97.9769(shown in table), 0.0000 Ions Score: 27 Expect: 0.28 (help)

| #  | b         | b <sup>++</sup> | b <sup>*</sup> | b <sup>+++</sup> | b <sup>0</sup> | b <sup>0++</sup> | Seq. | y         | y <sup>++</sup> | y <sup>*</sup> | y <sup>+++</sup> | y <sup>0</sup> | y <sup>0++</sup> | #  |
|----|-----------|-----------------|----------------|------------------|----------------|------------------|------|-----------|-----------------|----------------|------------------|----------------|------------------|----|
| 1  | 114.0913  | 57.5493         |                |                  |                |                  | L    |           |                 |                |                  |                |                  | 16 |
| 2  | 215.1390  | 108.0731        |                |                  | 197.1285       | 99.0679          | T    | 1749.9204 | 875.4638        | 1732.8938      | 866.9506         | 1731.9098      | 866.4585         | 15 |
| 3  | 343.2340  | 172.1206        | 326.2074       | 163.6074         | 325.2234       | 163.1153         | K    | 1648.8727 | 824.9400        | 1631.8462      | 816.4267         | 1630.8621      | 815.9347         | 14 |
| 4  | 471.2926  | 236.1499        | 454.2660       | 227.6366         | 453.2820       | 227.1446         | Q    | 1520.7777 | 760.8925        | 1503.7512      | 752.3792         | 1502.7672      | 751.8872         | 13 |
| 5  | 618.3280  | 309.6676        | 601.3014       | 301.1543         | 600.3174       | 300.6623         | M    | 1392.7192 | 696.8632        | 1375.6926      | 688.3499         | 1374.7086      | 687.8579         | 12 |
| 6  | 732.3709  | 366.6891        | 715.3443       | 358.1758         | 714.3603       | 357.6838         | N    | 1245.6838 | 623.3455        | 1228.6572      | 614.8322         | 1227.6732      | 614.3402         | 11 |
| 7  | 803.4080  | 402.2076        | 786.3815       | 393.6944         | 785.3974       | 393.2024         | A    | 1131.6408 | 566.3241        | 1114.6143      | 557.8108         | 1113.6303      | 557.3188         | 10 |
| 8  | 916.4921  | 458.7497        | 899.4655       | 450.2364         | 898.4815       | 449.7444         | I    | 1060.6037 | 530.8055        | 1043.5772      | 522.2922         | 1042.5932      | 521.8002         | 9  |
| 9  | 1029.5761 | 515.2917        | 1012.5496      | 506.7784         | 1011.5656      | 506.2864         | I    | 947.5197  | 474.2635        | 930.4931       | 465.7502         | 929.5091       | 465.2582         | 8  |
| 10 | 1144.6031 | 572.8052        | 1127.5765      | 564.2919         | 1126.5925      | 563.7999         | D    | 834.4356  | 417.7214        | 817.4090       | 409.2082         | 816.4250       | 408.7162         | 7  |
| 11 | 1227.6402 | 614.3237        | 1210.6136      | 605.8105         | 1209.6296      | 605.3184         | T    | 719.4087  | 360.2080        | 702.3821       | 351.6947         | 701.3981       | 351.2027         | 6  |
| 12 | 1326.7086 | 663.8579        | 1309.6821      | 655.3447         | 1308.6980      | 654.8527         | V    | 636.3715  | 318.6894        | 619.3450       | 310.1761         |                |                  | 5  |
| 13 | 1439.7927 | 720.4000        | 1422.7661      | 711.8867         | 1421.7821      | 711.3947         | I    | 537.3031  | 269.1552        | 520.2766       | 260.6419         |                |                  | 4  |
| 14 | 1553.8356 | 777.4214        | 1536.8090      | 768.9082         | 1535.8250      | 768.4162         | N    | 424.2191  | 212.6132        | 407.1925       | 204.0999         |                |                  | 3  |
| 15 | 1716.8989 | 858.9531        | 1699.8724      | 850.4398         | 1698.8884      | 849.9478         | Y    | 310.1761  | 155.5917        | 293.1496       | 147.0784         |                |                  | 2  |
| 16 |           |                 |                |                  |                |                  | K    | 147.1128  | 74.0600         | 130.0863       | 65.5468          |                |                  | 1  |

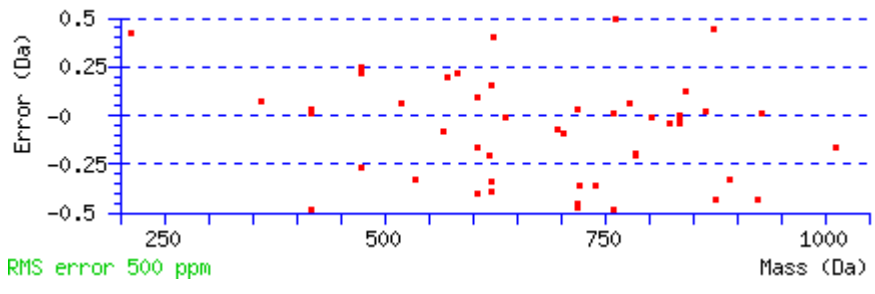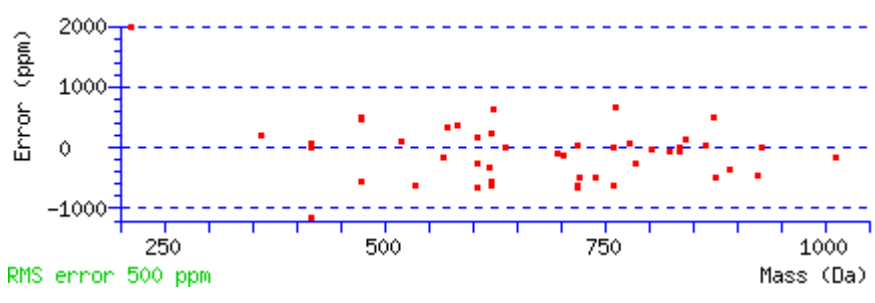

IDENTIFICATION 123

MS/MS Fragmentation of **IYHLPDAESDEDEDFKEQTR**

Found in **IPI00114945**

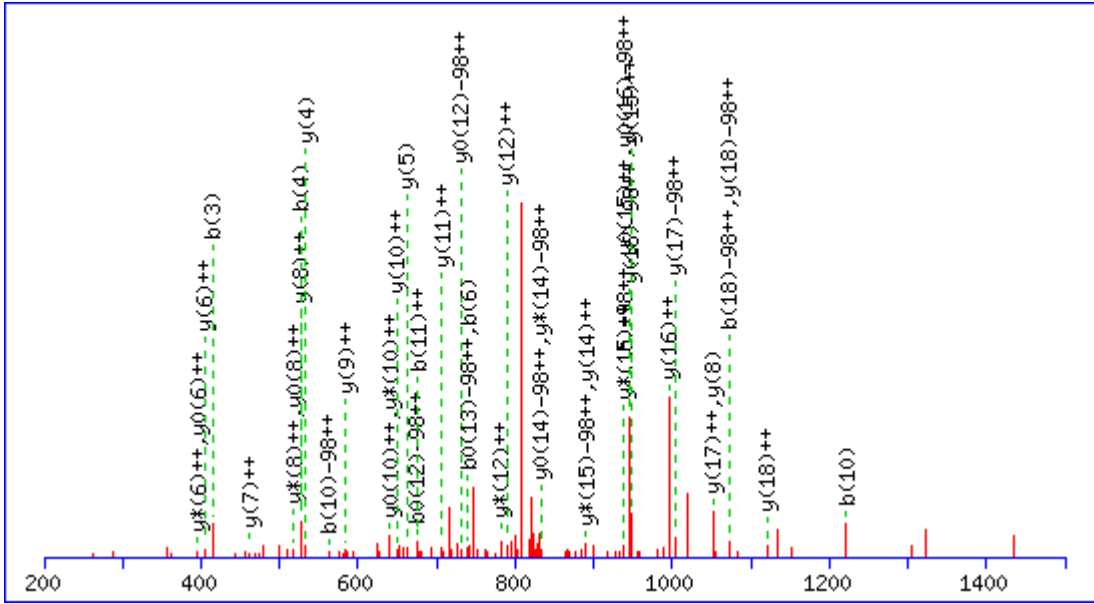

Monoisotopic mass of neutral peptide Mr(calc): 2516.0380

Fixed modifications: Carbamidomethyl (C) (apply to specified residues or termini only)

Variable modifications:

S9 : Phospho (ST), with neutral losses 0.0000(shown in table), 97.9769

Ions Score: 38 Expect: 0.038 (help)

| #  | b         | b <sup>++</sup> | b <sup>*</sup> | b <sup>+++</sup> | b <sup>0</sup> | b <sup>0++</sup> | Seq. | y         | y <sup>++</sup> | y <sup>*</sup> | y <sup>+++</sup> | y <sup>0</sup> | y <sup>0++</sup> | #  |
|----|-----------|-----------------|----------------|------------------|----------------|------------------|------|-----------|-----------------|----------------|------------------|----------------|------------------|----|
| 1  | 114.0913  | 57.5493         |                |                  |                |                  | I    |           |                 |                |                  |                |                  | 20 |
| 2  | 277.1547  | 139.0810        |                |                  |                |                  | Y    | 2403.9613 | 1202.4843       | 2386.9347      | 1193.9710        | 2385.9507      | 1193.4790        | 19 |
| 3  | 414.2136  | 207.6104        |                |                  |                |                  | H    | 2240.8979 | 1120.9526       | 2223.8714      | 1112.4393        | 2222.8874      | 1111.9473        | 18 |
| 4  | 527.2976  | 264.1525        |                |                  |                |                  | L    | 2103.8390 | 1052.4232       | 2086.8125      | 1043.9099        | 2085.8285      | 1043.4179        | 17 |
| 5  | 624.3504  | 312.6788        |                |                  |                |                  | P    | 1990.7550 | 995.8811        | 1973.7284      | 987.3678         | 1972.7444      | 986.8758         | 16 |
| 6  | 739.3774  | 370.1923        |                |                  | 721.3668       | 361.1870         | D    | 1893.7022 | 947.3547        | 1876.6757      | 938.8415         | 1875.6916      | 938.3495         | 15 |
| 7  | 810.4145  | 405.7109        |                |                  | 792.4039       | 396.7056         | A    | 1778.6753 | 889.8413        | 1761.6487      | 881.3280         | 1760.6647      | 880.8360         | 14 |
| 8  | 939.4571  | 470.2322        |                |                  | 921.4465       | 461.2269         | E    | 1707.6381 | 854.3227        | 1690.6116      | 845.8094         | 1689.6276      | 845.3174         | 13 |
| 9  | 1106.4554 | 553.7313        |                |                  | 1088.4449      | 544.7261         | S    | 1578.5956 | 789.8014        | 1561.5690      | 781.2881         | 1560.5850      | 780.7961         | 12 |
| 10 | 1221.4824 | 611.2448        |                |                  | 1203.4718      | 602.2395         | D    | 1411.5972 | 706.3022        | 1394.5706      | 697.7890         | 1393.5866      | 697.2970         | 11 |
| 11 | 1350.5250 | 675.7661        |                |                  | 1332.5144      | 666.7608         | E    | 1296.5703 | 648.7888        | 1279.5437      | 640.2755         | 1278.5597      | 639.7835         | 10 |
| 12 | 1465.5519 | 733.2796        |                |                  | 1447.5413      | 724.2743         | D    | 1167.5277 | 584.2675        | 1150.5011      | 575.7542         | 1149.5171      | 575.2622         | 9  |
| 13 | 1594.5945 | 797.8009        |                |                  | 1576.5839      | 788.7956         | E    | 1052.5007 | 526.7540        | 1035.4742      | 518.2407         | 1034.4902      | 517.7487         | 8  |
| 14 | 1709.6214 | 855.3144        |                |                  | 1691.6109      | 846.3091         | D    | 923.4581  | 462.2327        | 906.4316       | 453.7194         | 905.4476       | 453.2274         | 7  |
| 15 | 1856.6898 | 928.8486        |                |                  | 1838.6793      | 919.8433         | F    | 808.4312  | 404.7192        | 791.4046       | 396.2060         | 790.4206       | 395.7139         | 6  |
| 16 | 1984.7848 | 992.8960        | 1967.7583      | 984.3828         | 1966.7742      | 983.8908         | K    | 661.3628  | 331.1850        | 644.3362       | 322.6717         | 643.3522       | 322.1797         | 5  |
| 17 | 2113.8274 | 1057.4173       | 2096.8009      | 1048.9041        | 2095.8168      | 1048.4121        | E    | 533.2678  | 267.1375        | 516.2413       | 258.6243         | 515.2572       | 258.1323         | 4  |
| 18 | 2241.8860 | 1121.4466       | 2224.8594      | 1112.9334        | 2223.8754      | 1112.4413        | Q    | 404.2252  | 202.6162        | 387.1987       | 194.1030         | 386.2146       | 193.6110         | 3  |
| 19 | 2342.9337 | 1171.9705       | 2325.9071      | 1163.4572        | 2324.9231      | 1162.9652        | T    | 276.1666  | 138.5870        | 259.1401       | 130.0737         | 258.1561       | 129.5817         | 2  |
| 20 |           |                 |                |                  |                |                  | R    | 175.1190  | 88.0631         | 158.0924       | 79.5498          |                |                  | 1  |

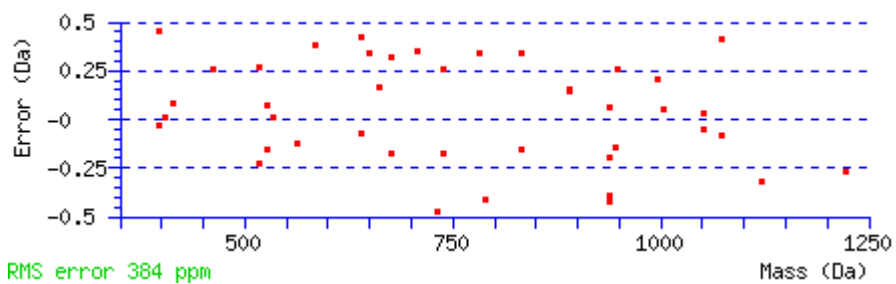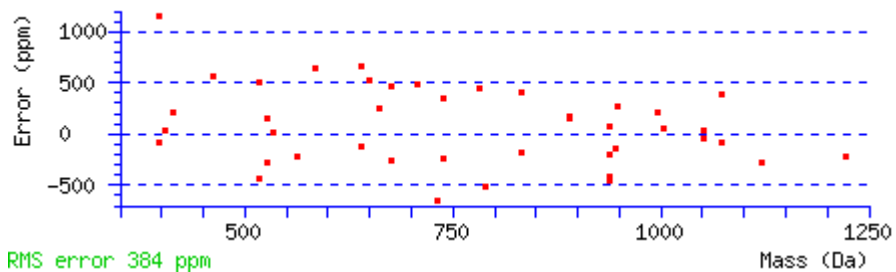

IDENTIFICATION 124

MS/MS Fragmentation of **ESIPAK**

Found in **IPI00274795**

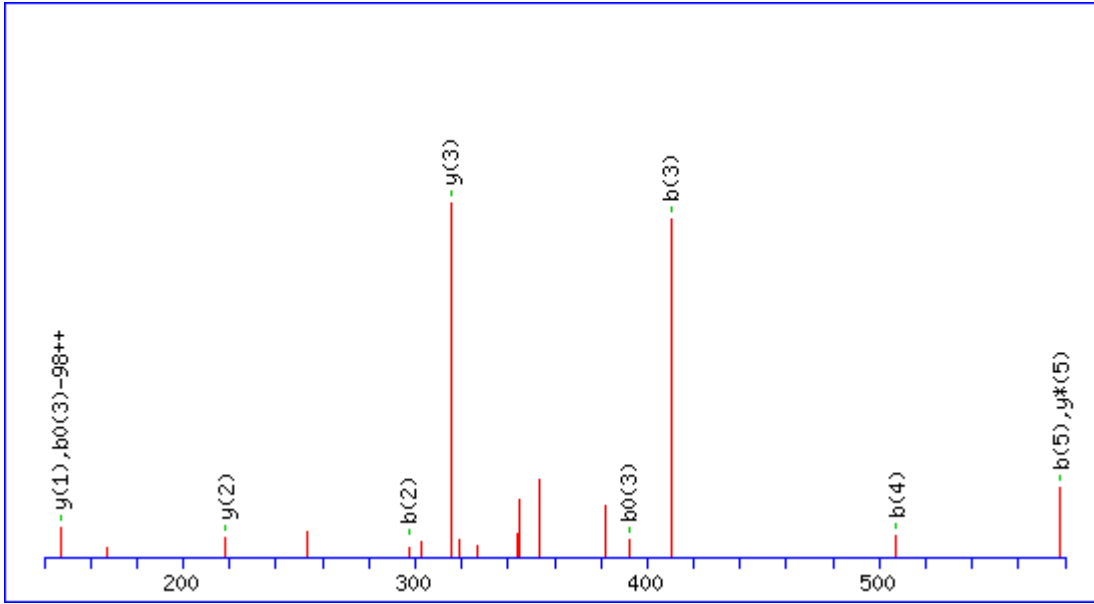

Monoisotopic mass of neutral peptide  $M_r(\text{calc})$ : 723.3204

Fixed modifications: Carbamidomethyl (C) (apply to specified residues or termini only)

Variable modifications:

S2 : Phospho (ST), with neutral losses 0.0000 (shown in table), 97.9769

Ions Score: 33 Expect: 0.028 (help)

| # | b        | b <sup>++</sup> | b <sup>0</sup> | b <sup>0++</sup> | Seq. | y        | y <sup>++</sup> | y <sup>*</sup> | y <sup>+++</sup> | y <sup>0</sup> | y <sup>0++</sup> | # |
|---|----------|-----------------|----------------|------------------|------|----------|-----------------|----------------|------------------|----------------|------------------|---|
| 1 | 130.0499 | 65.5286         | 112.0393       | 56.5233          | E    |          |                 |                |                  |                |                  | 6 |
| 2 | 297.0482 | 149.0278        | 279.0377       | 140.0225         | S    | 595.2851 | 298.1462        | 578.2586       | 289.6329         | 577.2745       | 289.1409         | 5 |
| 3 | 410.1323 | 205.5698        | 392.1217       | 196.5645         | I    | 428.2867 | 214.6470        | 411.2602       | 206.1337         |                |                  | 4 |
| 4 | 507.1851 | 254.0962        | 489.1745       | 245.0909         | P    | 315.2027 | 158.1050        | 298.1761       | 149.5917         |                |                  | 3 |
| 5 | 578.2222 | 289.6147        | 560.2116       | 280.6094         | A    | 218.1499 | 109.5786        | 201.1234       | 101.0653         |                |                  | 2 |
| 6 |          |                 |                |                  | K    | 147.1128 | 74.0600         | 130.0863       | 65.5468          |                |                  | 1 |

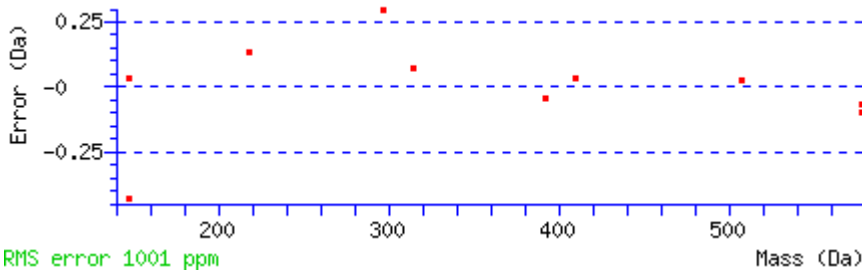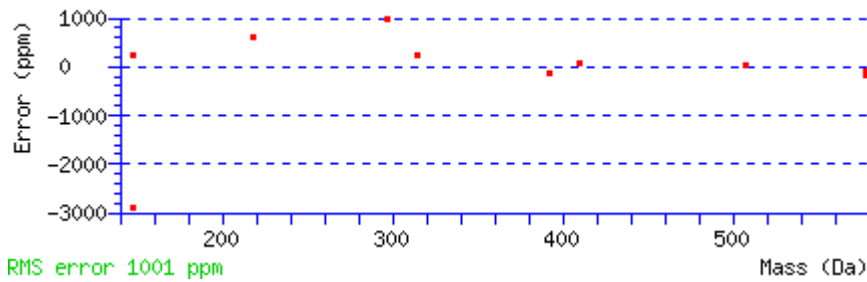

IDENTIFICATION 125  
MS/MS Fragmentation of  
LPSGSGPASPTTGSVDIR

Found in IPI00553798

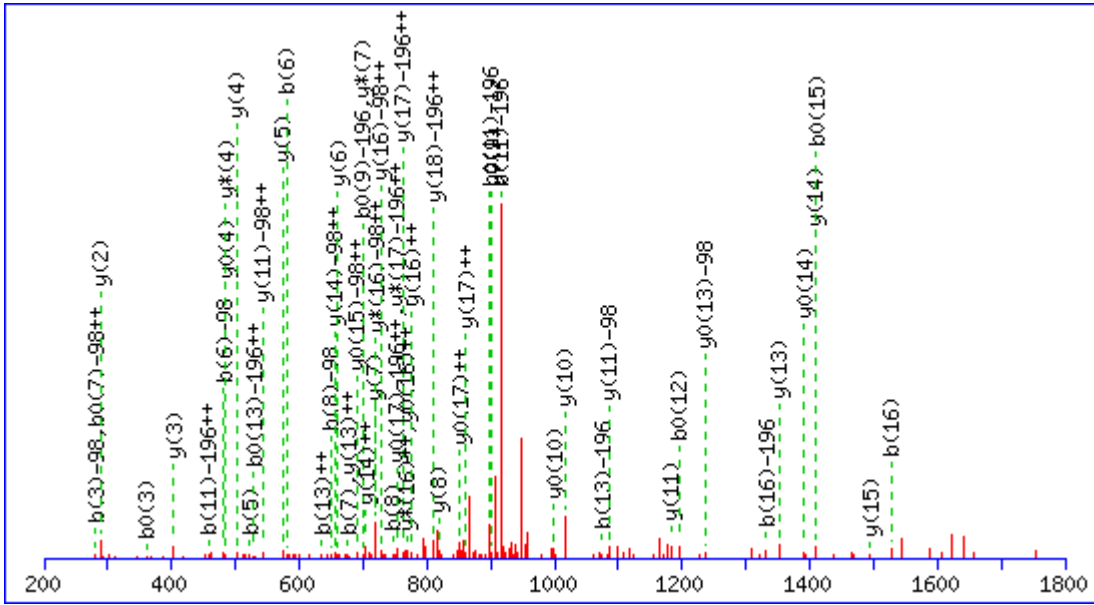

Monoisotopic mass of neutral peptide Mr(calc): 1928.8282 Fixed modifications: Carbamidomethyl (C) (apply to specified residues or termini only) Variable modifications: S3 : Phospho (ST), with neutral losses 0.0000(shown in table), 97.9769 S9 : Phospho (ST), with neutral losses 0.0000(shown in table), 97.9769 Ions Score: 33 Expect: 0.098 (help)

| #  | b         | b <sup>++</sup> | b <sup>0</sup> | b <sup>0++</sup> | Seq. | y         | y <sup>++</sup> | y <sup>*</sup> | y <sup>+++</sup> | y <sup>0</sup> | y <sup>0++</sup> | #  |
|----|-----------|-----------------|----------------|------------------|------|-----------|-----------------|----------------|------------------|----------------|------------------|----|
| 1  | 114.0913  | 57.5493         |                |                  | L    |           |                 |                |                  |                |                  | 19 |
| 2  | 211.1441  | 106.0757        |                |                  | P    | 1816.7514 | 908.8793        | 1799.7249      | 900.3661         | 1798.7409      | 899.8741         | 18 |
| 3  | 378.1425  | 189.5749        | 360.1319       | 180.5696         | S    | 1719.6987 | 860.3530        | 1702.6721      | 851.8397         | 1701.6881      | 851.3477         | 17 |
| 4  | 435.1639  | 218.0856        | 417.1534       | 209.0803         | G    | 1552.7003 | 776.8538        | 1535.6737      | 768.3405         | 1534.6897      | 767.8485         | 16 |
| 5  | 522.1960  | 261.6016        | 504.1854       | 252.5963         | S    | 1495.6788 | 748.3431        | 1478.6523      | 739.8298         | 1477.6683      | 739.3378         | 15 |
| 6  | 579.2174  | 290.1123        | 561.2069       | 281.1071         | G    | 1408.6468 | 704.8270        | 1391.6203      | 696.3138         | 1390.6362      | 695.8218         | 14 |
| 7  | 676.2702  | 338.6387        | 658.2596       | 329.6334         | P    | 1351.6253 | 676.3163        | 1334.5988      | 667.8030         | 1333.6148      | 667.3110         | 13 |
| 8  | 747.3073  | 374.1573        | 729.2967       | 365.1520         | A    | 1254.5726 | 627.7899        | 1237.5460      | 619.2767         | 1236.5620      | 618.7846         | 12 |
| 9  | 914.3057  | 457.6565        | 896.2951       | 448.6512         | S    | 1183.5355 | 592.2714        | 1166.5089      | 583.7581         | 1165.5249      | 583.2661         | 11 |
| 10 | 1011.3584 | 506.1828        | 993.3479       | 497.1776         | P    | 1016.5371 | 508.7722        | 999.5106       | 500.2589         | 998.5265       | 499.7669         | 10 |
| 11 | 1112.4061 | 556.7067        | 1094.3955      | 547.7014         | T    | 919.4843  | 460.2458        | 902.4578       | 451.7325         | 901.4738       | 451.2405         | 9  |
| 12 | 1213.4538 | 607.2305        | 1195.4432      | 598.2252         | T    | 818.4367  | 409.7220        | 801.4101       | 401.2087         | 800.4261       | 400.7167         | 8  |
| 13 | 1270.4752 | 635.7413        | 1252.4647      | 626.7360         | G    | 717.3890  | 359.1981        | 700.3624       | 350.6849         | 699.3784       | 350.1928         | 7  |
| 14 | 1357.5073 | 679.2573        | 1339.4967      | 670.2520         | S    | 660.3675  | 330.6874        | 643.3410       | 322.1741         | 642.3570       | 321.6821         | 6  |
| 15 | 1428.5444 | 714.7758        | 1410.5338      | 705.7705         | A    | 573.3355  | 287.1714        | 556.3089       | 278.6581         | 555.3249       | 278.1661         | 5  |
| 16 | 1527.6128 | 764.3100        | 1509.6022      | 755.3048         | V    | 502.2984  | 251.6528        | 485.2718       | 243.1395         | 484.2878       | 242.6475         | 4  |
| 17 | 1642.6397 | 821.8235        | 1624.6292      | 812.8182         | D    | 403.2300  | 202.1186        | 386.2034       | 193.6053         | 385.2194       | 193.1133         | 3  |
| 18 | 1755.7238 | 878.3655        | 1737.7132      | 869.3603         | I    | 288.2030  | 144.6051        | 271.1765       | 136.0919         |                |                  | 2  |
| 19 |           |                 |                |                  | R    | 175.1190  | 88.0631         | 158.0924       | 79.5498          |                |                  | 1  |



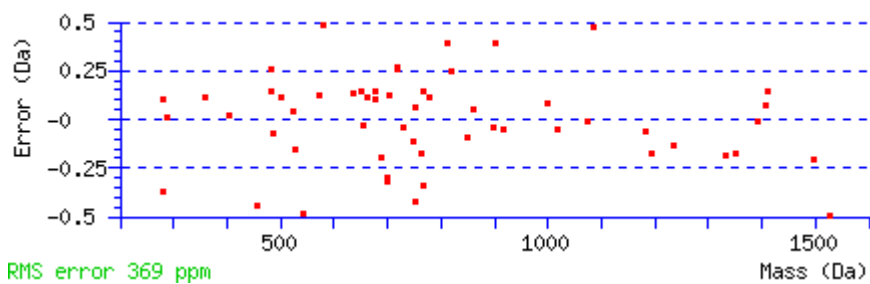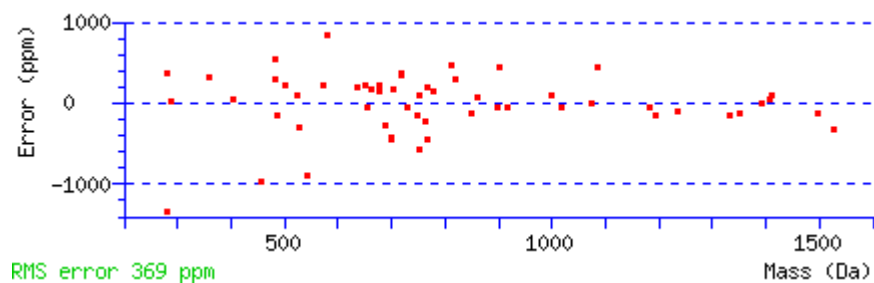

IDENTIFICATION 126

MS/MS Fragmentation of **KIDSHPSPHSSTVK**

Found in **IPI00664886**

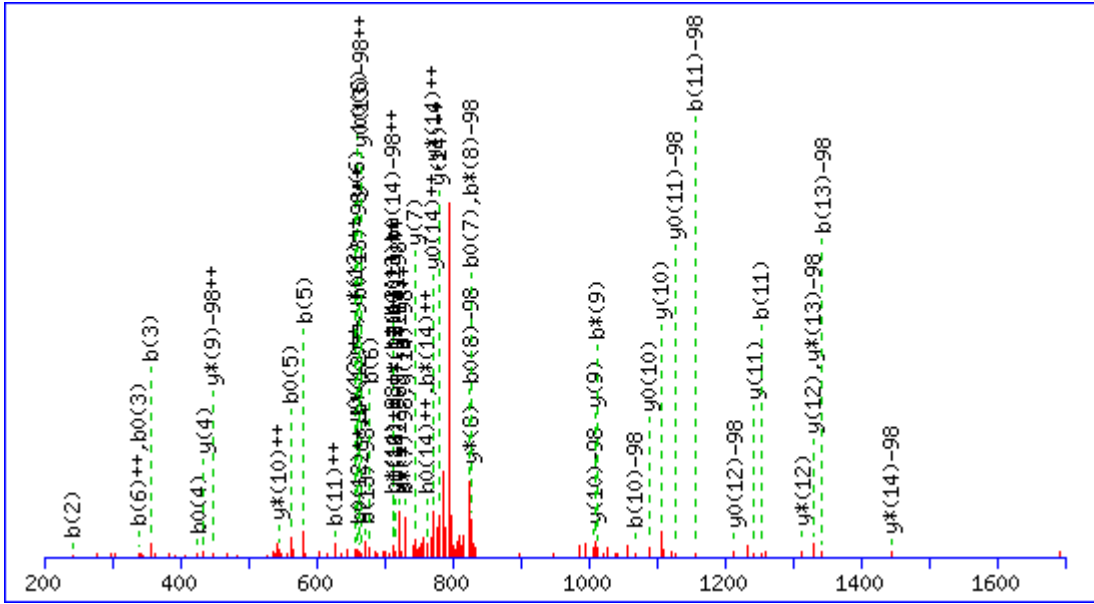

Monoisotopic mass of neutral peptide  $M_r(\text{calc})$ : 1685.7774

Fixed modifications: Carbamidomethyl (C) (apply to specified residues or termini only)

Variable modifications:

S7 : Phospho (ST), with neutral losses 97.9769 (shown in table), 0.0000

Ions Score: 27 Expect: 0.33 (help)

| #  | b         | b <sup>++</sup> | b <sup>*</sup> | b <sup>+++</sup> | b <sup>0</sup> | b <sup>0++</sup> | Seq. | y         | y <sup>++</sup> | y <sup>*</sup> | y <sup>+++</sup> | y <sup>0</sup> | y <sup>0++</sup> | #  |
|----|-----------|-----------------|----------------|------------------|----------------|------------------|------|-----------|-----------------|----------------|------------------|----------------|------------------|----|
| 1  | 129.1022  | 65.0548         | 112.0757       | 56.5415          |                |                  | K    |           |                 |                |                  |                |                  | 15 |
| 2  | 242.1863  | 121.5968        | 225.1598       | 113.0835         |                |                  | I    | 1460.7128 | 730.8601        | 1443.6863      | 722.3468         | 1442.7023      | 721.8548         | 14 |
| 3  | 357.2132  | 179.1103        | 340.1867       | 170.5970         | 339.2027       | 170.1050         | D    | 1347.6288 | 674.3180        | 1330.6022      | 665.8047         | 1329.6182      | 665.3127         | 13 |
| 4  | 444.2453  | 222.6263        | 427.2187       | 214.1130         | 426.2347       | 213.6210         | S    | 1232.6018 | 616.8046        | 1215.5753      | 608.2913         | 1214.5913      | 607.7993         | 12 |
| 5  | 581.3042  | 291.1557        | 564.2776       | 282.6425         | 563.2936       | 282.1504         | H    | 1145.5698 | 573.2885        | 1128.5432      | 564.7753         | 1127.5592      | 564.2833         | 11 |
| 6  | 678.3570  | 339.6821        | 661.3304       | 331.1688         | 660.3464       | 330.6768         | P    | 1008.5109 | 504.7591        | 991.4843       | 496.2458         | 990.5003       | 495.7538         | 10 |
| 7  | 747.3784  | 374.1928        | 730.3519       | 365.6796         | 729.3678       | 365.1876         | S    | 911.4581  | 456.2327        | 894.4316       | 447.7194         | 893.4476       | 447.2274         | 9  |
| 8  | 844.4312  | 422.7192        | 827.4046       | 414.2060         | 826.4206       | 413.7139         | P    | 842.4367  | 421.7220        | 825.4101       | 413.2087         | 824.4261       | 412.7167         | 8  |
| 9  | 931.4632  | 466.2352        | 914.4367       | 457.7220         | 913.4526       | 457.2300         | S    | 745.3839  | 373.1956        | 728.3573       | 364.6823         | 727.3733       | 364.1903         | 7  |
| 10 | 1068.5221 | 534.7647        | 1051.4956      | 526.2514         | 1050.5116      | 525.7594         | H    | 658.3519  | 329.6796        | 641.3253       | 321.1663         | 640.3413       | 320.6743         | 6  |
| 11 | 1155.5541 | 578.2807        | 1138.5276      | 569.7674         | 1137.5436      | 569.2754         | S    | 521.2930  | 261.1501        | 504.2664       | 252.6368         | 503.2824       | 252.1448         | 5  |
| 12 | 1242.5862 | 621.7967        | 1225.5596      | 613.2835         | 1224.5756      | 612.7914         | S    | 434.2609  | 217.6341        | 417.2344       | 209.1208         | 416.2504       | 208.6288         | 4  |
| 13 | 1343.6339 | 672.3206        | 1326.6073      | 663.8073         | 1325.6233      | 663.3153         | T    | 347.2289  | 174.1181        | 330.2023       | 165.6048         | 329.2183       | 165.1128         | 3  |
| 14 | 1442.7023 | 721.8548        | 1425.6757      | 713.3415         | 1424.6917      | 712.8495         | V    | 246.1812  | 123.5942        | 229.1547       | 115.0810         |                |                  | 2  |
| 15 |           |                 |                |                  |                |                  | K    | 147.1128  | 74.0600         | 130.0863       | 65.5468          |                |                  | 1  |

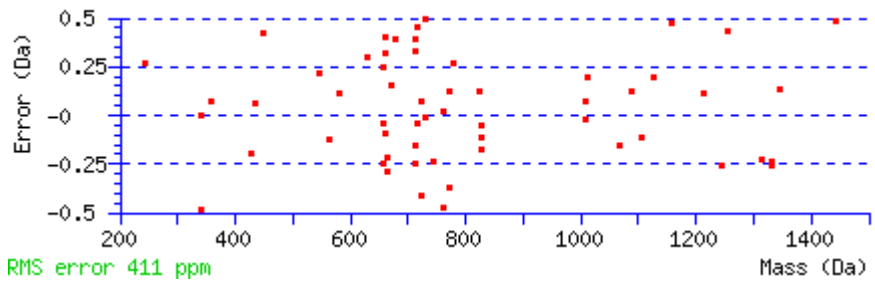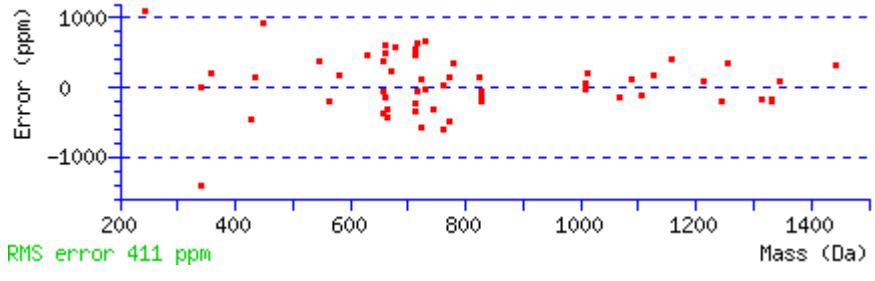



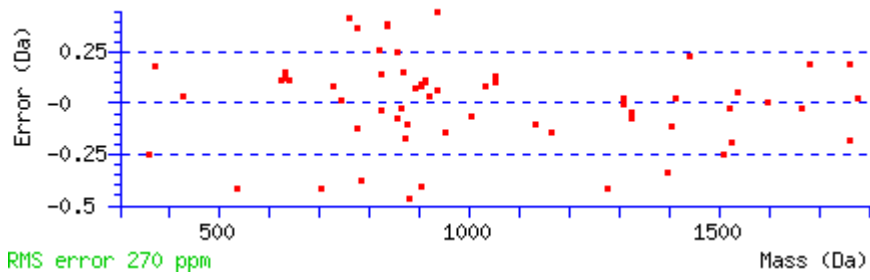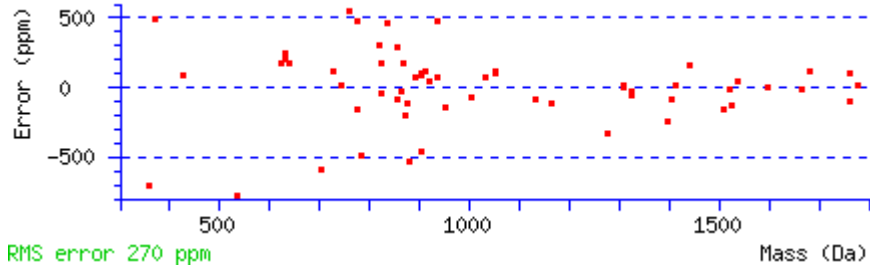



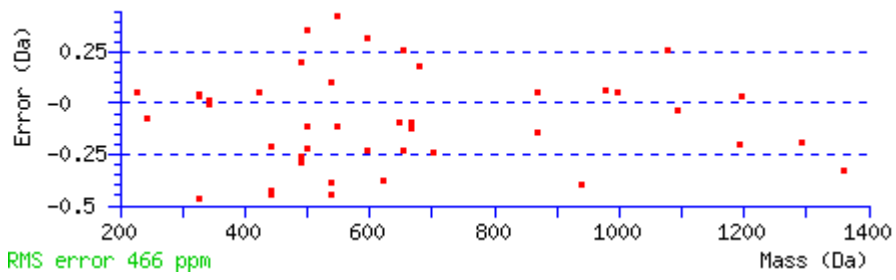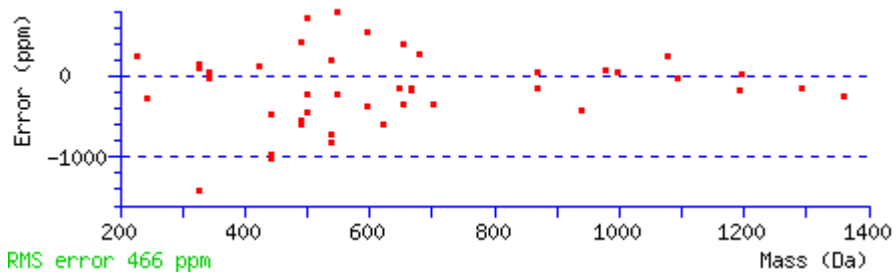

IDENTIFICATION 129

MS/MS Fragmentation of **SSEAETQPPAAPAAALSAADTKPGSTGSGAGSGGPGGLTSAAPAGGDKK**

Found in **IPI00120886**

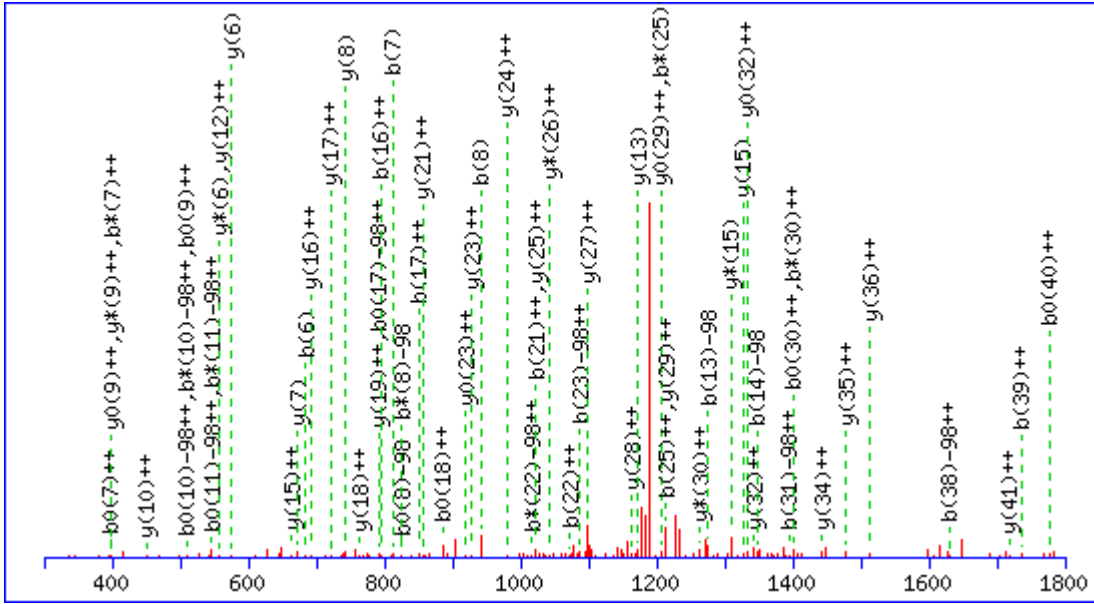

Monoisotopic mass of neutral peptide Mr(calc): 4471.0776

Fixed modifications: Carbamidomethyl (C) (apply to specified residues or termini only)

Variable modifications:

T6 : Phospho (ST), with neutral losses 0.0000(shown in table), 97.9769

Ions Score: 26 Expect: 0.49 (help)

| #  | b         | b <sup>++</sup> | b <sup>*</sup> | b <sup>+++</sup> | b <sup>0</sup> | b <sup>0++</sup> | Seq. | y         | y <sup>++</sup> | y <sup>*</sup> | y <sup>+++</sup> | y <sup>0</sup> | y <sup>0++</sup> | #  |
|----|-----------|-----------------|----------------|------------------|----------------|------------------|------|-----------|-----------------|----------------|------------------|----------------|------------------|----|
| 1  | 88.0393   | 44.5233         |                |                  | 70.0287        | 35.5180          | S    |           |                 |                |                  |                |                  | 50 |
| 2  | 175.0713  | 88.0393         |                |                  | 157.0608       | 79.0340          | S    | 4385.0529 | 2193.0301       | 4368.0263      | 2184.5168        | 4367.0423      | 2184.0248        | 49 |
| 3  | 304.1139  | 152.5606        |                |                  | 286.1034       | 143.5553         | E    | 4298.0209 | 2149.5141       | 4280.9943      | 2141.0008        | 4280.0103      | 2140.5088        | 48 |
| 4  | 375.1510  | 188.0792        |                |                  | 357.1405       | 179.0739         | A    | 4168.9783 | 2084.9928       | 4151.9517      | 2076.4795        | 4150.9677      | 2075.9875        | 47 |
| 5  | 504.1936  | 252.6005        |                |                  | 486.1831       | 243.5952         | E    | 4097.9412 | 2049.4742       | 4080.9146      | 2040.9609        | 4079.9306      | 2040.4689        | 46 |
| 6  | 685.2076  | 343.1075        |                |                  | 667.1971       | 334.1022         | T    | 3968.8986 | 1984.9529       | 3951.8720      | 1976.4396        | 3950.8880      | 1975.9476        | 45 |
| 7  | 813.2662  | 407.1367        | 796.2397       | 398.6235         | 795.2557       | 398.1315         | Q    | 3787.8846 | 1894.4459       | 3770.8580      | 1885.9326        | 3769.8740      | 1885.4406        | 44 |
| 8  | 941.3248  | 471.1660        | 924.2982       | 462.6528         | 923.3142       | 462.1608         | Q    | 3659.8260 | 1830.4166       | 3642.7994      | 1821.9034        | 3641.8154      | 1821.4113        | 43 |
| 9  | 1038.3776 | 519.6924        | 1021.3510      | 511.1791         | 1020.3670      | 510.6871         | P    | 3531.7674 | 1766.3873       | 3514.7408      | 1757.8741        | 3513.7568      | 1757.3821        | 42 |
| 10 | 1135.4303 | 568.2188        | 1118.4038      | 559.7055         | 1117.4198      | 559.2135         | P    | 3434.7146 | 1717.8610       | 3417.6881      | 1709.3477        | 3416.7041      | 1708.8557        | 41 |
| 11 | 1206.4674 | 603.7374        | 1189.4409      | 595.2241         | 1188.4569      | 594.7321         | A    | 3337.6619 | 1669.3346       | 3320.6353      | 1660.8213        | 3319.6513      | 1660.3293        | 40 |
| 12 | 1277.5046 | 639.2559        | 1260.4780      | 630.7426         | 1259.4940      | 630.2506         | A    | 3266.6248 | 1633.8160       | 3249.5982      | 1625.3027        | 3248.6142      | 1624.8107        | 39 |
| 13 | 1374.5573 | 687.7823        | 1357.5308      | 679.2690         | 1356.5468      | 678.7770         | P    | 3195.5876 | 1598.2975       | 3178.5611      | 1589.7842        | 3177.5771      | 1589.2922        | 38 |
| 14 | 1445.5944 | 723.3009        | 1428.5679      | 714.7876         | 1427.5839      | 714.2956         | A    | 3098.5349 | 1549.7711       | 3081.5083      | 1541.2578        | 3080.5243      | 1540.7658        | 37 |
| 15 | 1516.6315 | 758.8194        | 1499.6050      | 750.3061         | 1498.6210      | 749.8141         | A    | 3027.4978 | 1514.2525       | 3010.4712      | 1505.7392        | 3009.4872      | 1505.2472        | 36 |
| 16 | 1587.6687 | 794.3380        | 1570.6421      | 785.8247         | 1569.6581      | 785.3327         | A    | 2956.4607 | 1478.7340       | 2939.4341      | 1470.2207        | 2938.4501      | 1469.7287        | 35 |
| 17 | 1700.7527 | 850.8800        | 1683.7262      | 842.3667         | 1682.7422      | 841.8747         | L    | 2885.4235 | 1443.2154       | 2868.3970      | 1434.7021        | 2867.4130      | 1434.2101        | 34 |
| 18 | 1787.7848 | 894.3960        | 1770.7582      | 885.8827         | 1769.7742      | 885.3907         | S    | 2772.3395 | 1386.6734       | 2755.3129      | 1378.1601        | 2754.3289      | 1377.6681        | 33 |
| 19 | 1858.8219 | 929.9146        | 1841.7953      | 921.4013         | 1840.8113      | 920.9093         | A    | 2685.3074 | 1343.1574       | 2668.2809      | 1334.6441        | 2667.2969      | 1334.1521        | 32 |
| 20 | 1929.8590 | 965.4331        | 1912.8324      | 956.9199         | 1911.8484      | 956.4278         | A    | 2614.2703 | 1307.6388       | 2597.2438      | 1299.1255        | 2596.2598      | 1298.6335        | 31 |
| 21 | 2044.8859 | 1022.9466       | 2027.8594      | 1014.4333        | 2026.8754      | 1013.9413        | D    | 2543.2332 | 1272.1202       | 2526.2067      | 1263.6070        | 2525.2227      | 1263.1150        | 30 |
| 22 | 2145.9336 | 1073.4704       | 2128.9071      | 1064.9572        | 2127.9230      | 1064.4652        | T    | 2428.2063 | 1214.6068       | 2411.1797      | 1206.0935        | 2410.1957      | 1205.6015        | 29 |
| 23 | 2274.0286 | 1137.5179       | 2257.0020      | 1129.0046        | 2256.0180      | 1128.5126        | K    | 2327.1586 | 1164.0829       | 2310.1320      | 1155.5697        | 2309.1480      | 1155.0777        | 28 |
| 24 | 2371.0813 | 1186.0443       | 2354.0548      | 1177.5310        | 2353.0708      | 1177.0390        | P    | 2199.0636 | 1100.0355       | 2182.0371      | 1091.5222        | 2181.0531      | 1091.0302        | 27 |
| 25 | 2428.1028 | 1214.5550       | 2411.0762      | 1206.0418        | 2410.0922      | 1205.5498        | G    | 2102.0109 | 1051.5091       | 2084.9843      | 1042.9958        | 2084.0003      | 1042.5038        | 26 |
| 26 | 2515.1348 | 1258.0710       | 2498.1083      | 1249.5578        | 2497.1243      | 1249.0658        | S    | 2044.9894 | 1022.9983       | 2027.9629      | 1014.4851        | 2026.9788      | 1013.9931        | 25 |
| 27 | 2616.1825 | 1308.5949       | 2599.1560      | 1300.0816        | 2598.1719      | 1299.5896        | T    | 1957.9574 | 979.4823        | 1940.9308      | 970.9691         | 1939.9468      | 970.4770         | 24 |



|    |           |           |           |           |           |           |   |           |          |           |          |           |          |    |
|----|-----------|-----------|-----------|-----------|-----------|-----------|---|-----------|----------|-----------|----------|-----------|----------|----|
| 28 | 2673.2040 | 1337.1056 | 2656.1774 | 1328.5923 | 2655.1934 | 1328.1003 | G | 1856.9097 | 928.9585 | 1839.8831 | 920.4452 | 1838.8991 | 919.9532 | 23 |
| 29 | 2760.2360 | 1380.6216 | 2743.2094 | 1372.1084 | 2742.2254 | 1371.6164 | S | 1799.8882 | 900.4478 | 1782.8617 | 891.9345 | 1781.8777 | 891.4425 | 22 |
| 30 | 2817.2575 | 1409.1324 | 2800.2309 | 1400.6191 | 2799.2469 | 1400.1271 | G | 1712.8562 | 856.9317 | 1695.8297 | 848.4185 | 1694.8456 | 847.9265 | 21 |
| 31 | 2888.2946 | 1444.6509 | 2871.2680 | 1436.1376 | 2870.2840 | 1435.6456 | A | 1655.8347 | 828.4210 | 1638.8082 | 819.9077 | 1637.8242 | 819.4157 | 20 |
| 32 | 2945.3160 | 1473.1617 | 2928.2895 | 1464.6484 | 2927.3055 | 1464.1564 | G | 1584.7976 | 792.9025 | 1567.7711 | 784.3892 | 1566.7871 | 783.8972 | 19 |
| 33 | 3032.3481 | 1516.6777 | 3015.3215 | 1508.1644 | 3014.3375 | 1507.6724 | S | 1527.7762 | 764.3917 | 1510.7496 | 755.8784 | 1509.7656 | 755.3864 | 18 |
| 34 | 3089.3695 | 1545.1884 | 3072.3430 | 1536.6751 | 3071.3590 | 1536.1831 | G | 1440.7441 | 720.8757 | 1423.7176 | 712.3624 | 1422.7336 | 711.8704 | 17 |
| 35 | 3146.3910 | 1573.6991 | 3129.3644 | 1565.1859 | 3128.3804 | 1564.6939 | G | 1383.7227 | 692.3650 | 1366.6961 | 683.8517 | 1365.7121 | 683.3597 | 16 |
| 36 | 3243.4438 | 1622.2255 | 3226.4172 | 1613.7122 | 3225.4332 | 1613.2202 | P | 1326.7012 | 663.8542 | 1309.6747 | 655.3410 | 1308.6906 | 654.8490 | 15 |
| 37 | 3300.4652 | 1650.7362 | 3283.4387 | 1642.2230 | 3282.4547 | 1641.7310 | G | 1229.6484 | 615.3279 | 1212.6219 | 606.8146 | 1211.6379 | 606.3226 | 14 |
| 38 | 3357.4867 | 1679.2470 | 3340.4601 | 1670.7337 | 3339.4761 | 1670.2417 | G | 1172.6270 | 586.8171 | 1155.6004 | 578.3039 | 1154.6164 | 577.8118 | 13 |
| 39 | 3470.5707 | 1735.7890 | 3453.5442 | 1727.2757 | 3452.5602 | 1726.7837 | L | 1115.6055 | 558.3064 | 1098.5790 | 549.7931 | 1097.5949 | 549.3011 | 12 |
| 40 | 3571.6184 | 1786.3129 | 3554.5919 | 1777.7996 | 3553.6079 | 1777.3076 | T | 1002.5215 | 501.7644 | 985.4949  | 493.2511 | 984.5109  | 492.7591 | 11 |
| 41 | 3658.6505 | 1829.8289 | 3641.6239 | 1821.3156 | 3640.6399 | 1820.8236 | S | 901.4738  | 451.2405 | 884.4472  | 442.7272 | 883.4632  | 442.2352 | 10 |
| 42 | 3729.6876 | 1865.3474 | 3712.6610 | 1856.8341 | 3711.6770 | 1856.3421 | A | 814.4417  | 407.7245 | 797.4152  | 399.2112 | 796.4312  | 398.7192 | 9  |
| 43 | 3800.7247 | 1900.8660 | 3783.6981 | 1892.3527 | 3782.7141 | 1891.8607 | A | 743.4046  | 372.2060 | 726.3781  | 363.6927 | 725.3941  | 363.2007 | 8  |
| 44 | 3897.7774 | 1949.3924 | 3880.7509 | 1940.8791 | 3879.7669 | 1940.3871 | P | 672.3675  | 336.6874 | 655.3410  | 328.1741 | 654.3570  | 327.6821 | 7  |
| 45 | 3968.8146 | 1984.9109 | 3951.7880 | 1976.3976 | 3950.8040 | 1975.9056 | A | 575.3148  | 288.1610 | 558.2882  | 279.6477 | 557.3042  | 279.1557 | 6  |
| 46 | 4025.8360 | 2013.4216 | 4008.8095 | 2004.9084 | 4007.8255 | 2004.4164 | G | 504.2776  | 252.6425 | 487.2511  | 244.1292 | 486.2671  | 243.6372 | 5  |
| 47 | 4082.8575 | 2041.9324 | 4065.8309 | 2033.4191 | 4064.8469 | 2032.9271 | G | 447.2562  | 224.1317 | 430.2296  | 215.6185 | 429.2456  | 215.1264 | 4  |
| 48 | 4197.8844 | 2099.4459 | 4180.8579 | 2090.9326 | 4179.8739 | 2090.4406 | D | 390.2347  | 195.6210 | 373.2082  | 187.1077 | 372.2241  | 186.6157 | 3  |
| 49 | 4325.9794 | 2163.4933 | 4308.9528 | 2154.9801 | 4307.9688 | 2154.4881 | K | 275.2078  | 138.1075 | 258.1812  | 129.5942 |           |          | 2  |
| 50 |           |           |           |           |           |           | K | 147.1128  | 74.0600  | 130.0863  | 65.5468  |           |          | 1  |

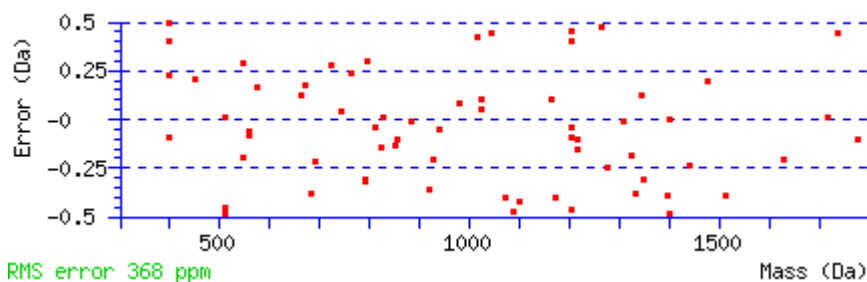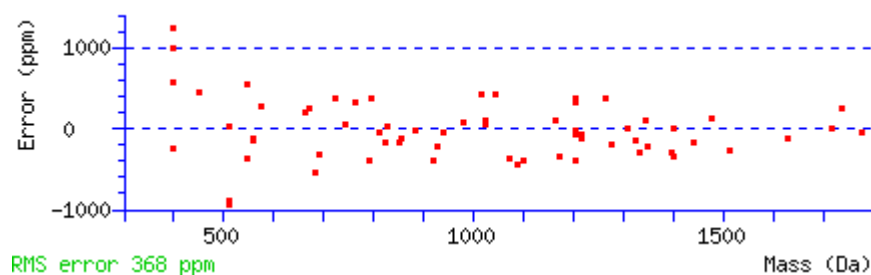

IDENTIFICATION 130

MS/MS Fragmentation of **SSEVVLSGDDDEDYQR**

Found in **IPI00553798**

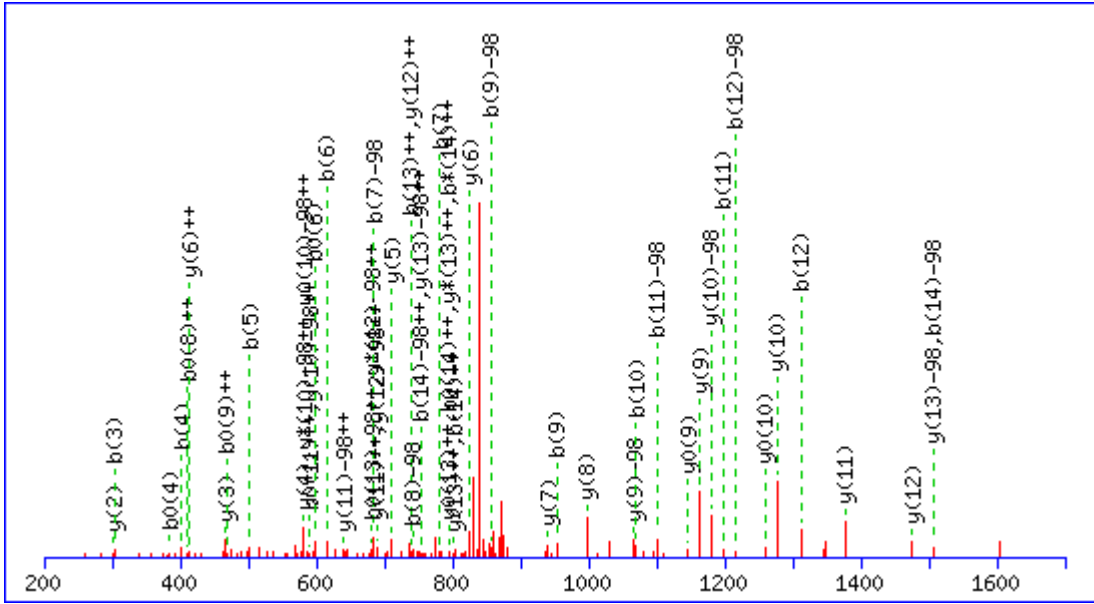

Monoisotopic mass of neutral peptide Mr(calc): 1777.7044 Fixed modifications: Carbamidomethyl (C) (apply to specified residues or termini only) Variable modifications: S7 : Phospho (ST), with neutral losses 97.9769 (shown in table), 0.0000 Ions Score: 58 Expect: 0.00025 (help)

| #  | b         | b <sup>++</sup> | b <sup>*</sup> | b <sup>+++</sup> | b <sup>0</sup> | b <sup>0++</sup> | Seq. | y         | y <sup>++</sup> | y <sup>*</sup> | y <sup>**</sup> | y <sup>0</sup> | y <sup>0++</sup> | #  |
|----|-----------|-----------------|----------------|------------------|----------------|------------------|------|-----------|-----------------|----------------|-----------------|----------------|------------------|----|
| 1  | 88.0393   | 44.5233         |                |                  | 70.0287        | 35.5180          | S    |           |                 |                |                 |                |                  | 15 |
| 2  | 175.0713  | 88.0393         |                |                  | 157.0608       | 79.0340          | S    | 1593.7027 | 797.3550        | 1576.6762      | 788.8417        | 1575.6922      | 788.3497         | 14 |
| 3  | 304.1139  | 152.5606        |                |                  | 286.1034       | 143.5553         | E    | 1506.6707 | 753.8390        | 1489.6441      | 745.3257        | 1488.6601      | 744.8337         | 13 |
| 4  | 403.1823  | 202.0948        |                |                  | 385.1718       | 193.0895         | V    | 1377.6281 | 689.3177        | 1360.6016      | 680.8044        | 1359.6175      | 680.3124         | 12 |
| 5  | 502.2508  | 251.6290        |                |                  | 484.2402       | 242.6237         | V    | 1278.5597 | 639.7835        | 1261.5331      | 631.2702        | 1260.5491      | 630.7782         | 11 |
| 6  | 615.3348  | 308.1710        |                |                  | 597.3243       | 299.1658         | L    | 1179.4913 | 590.2493        | 1162.4647      | 581.7360        | 1161.4807      | 581.2440         | 10 |
| 7  | 684.3563  | 342.6818        |                |                  | 666.3457       | 333.6765         | S    | 1066.4072 | 533.7072        | 1049.3807      | 525.1940        | 1048.3966      | 524.7020         | 9  |
| 8  | 741.3777  | 371.1925        |                |                  | 723.3672       | 362.1872         | G    | 997.3857  | 499.1965        | 980.3592       | 490.6832        | 979.3752       | 490.1912         | 8  |
| 9  | 856.4047  | 428.7060        |                |                  | 838.3941       | 419.7007         | D    | 940.3643  | 470.6858        | 923.3377       | 462.1725        | 922.3537       | 461.6805         | 7  |
| 10 | 971.4316  | 486.2195        |                |                  | 953.4211       | 477.2142         | D    | 825.3373  | 413.1723        | 808.3108       | 404.6590        | 807.3268       | 404.1670         | 6  |
| 11 | 1100.4742 | 550.7407        |                |                  | 1082.4637      | 541.7355         | E    | 710.3104  | 355.6588        | 693.2838       | 347.1456        | 692.2998       | 346.6536         | 5  |
| 12 | 1215.5012 | 608.2542        |                |                  | 1197.4906      | 599.2489         | D    | 581.2678  | 291.1375        | 564.2413       | 282.6243        | 563.2572       | 282.1323         | 4  |
| 13 | 1378.5645 | 689.7859        |                |                  | 1360.5539      | 680.7806         | Y    | 466.2409  | 233.6241        | 449.2143       | 225.1108        |                |                  | 3  |
| 14 | 1506.6231 | 753.8152        | 1489.5965      | 745.3019         | 1488.6125      | 744.8099         | Q    | 303.1775  | 152.0924        | 286.1510       | 143.5791        |                |                  | 2  |
| 15 |           |                 |                |                  |                |                  | R    | 175.1190  | 88.0631         | 158.0924       | 79.5498         |                |                  | 1  |

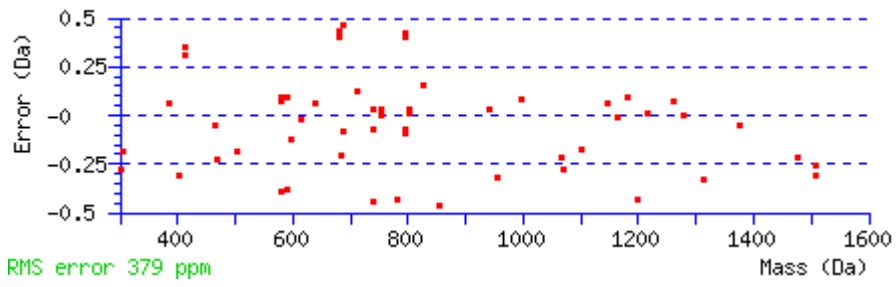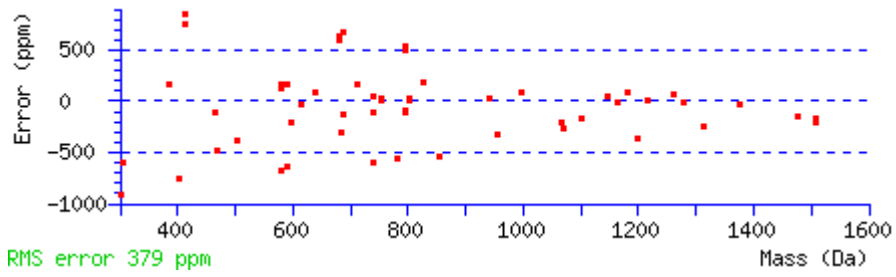

IDENTIFICATION 131

MS/MS Fragmentation of  
LPTLPK

Found in  
IPI00127493

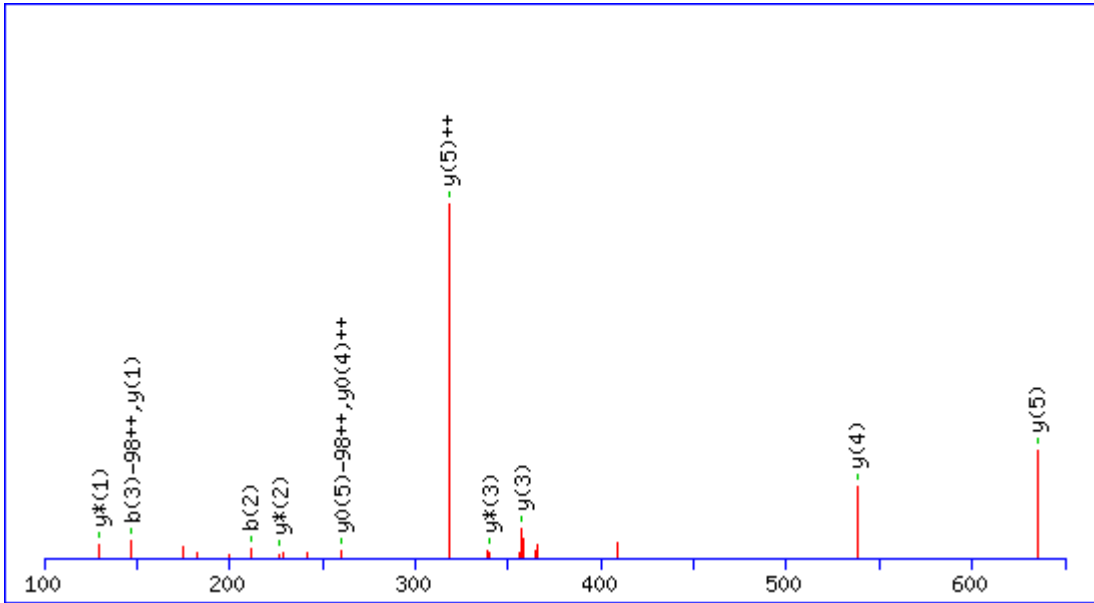

Monoisotopic mass of neutral peptide Mr(calc): 747.3932 Fixed modifications: Carbamidomethyl (C) (apply to specified residues or termini only) Variable modifications: T3 : Phospho (ST), with neutral losses 0.0000(shown in table), 97.9769 Ions Score: 43 Expect: 0.0032 (help)

| # | b        | b <sup>++</sup> | b <sup>0</sup> | b <sup>0++</sup> | Seq. | y        | y <sup>++</sup> | y <sup>*</sup> | y <sup>+++</sup> | y <sup>0</sup> | y <sup>0++</sup> | # |
|---|----------|-----------------|----------------|------------------|------|----------|-----------------|----------------|------------------|----------------|------------------|---|
| 1 | 114.0913 | 57.5493         |                |                  | L    |          |                 |                |                  |                |                  | 6 |
| 2 | 211.1441 | 106.0757        |                |                  | P    | 635.3164 | 318.1618        | 618.2899       | 309.6486         | 617.3058       | 309.1566         | 5 |
| 3 | 392.1581 | 196.5827        | 374.1475       | 187.5774         | T    | 538.2636 | 269.6355        | 521.2371       | 261.1222         | 520.2531       | 260.6302         | 4 |
| 4 | 505.2422 | 253.1247        | 487.2316       | 244.1194         | L    | 357.2496 | 179.1285        | 340.2231       | 170.6152         |                |                  | 3 |
| 5 | 602.2949 | 301.6511        | 584.2844       | 292.6458         | P    | 244.1656 | 122.5864        | 227.1390       | 114.0731         |                |                  | 2 |
| 6 |          |                 |                |                  | K    | 147.1128 | 74.0600         | 130.0863       | 65.5468          |                |                  | 1 |

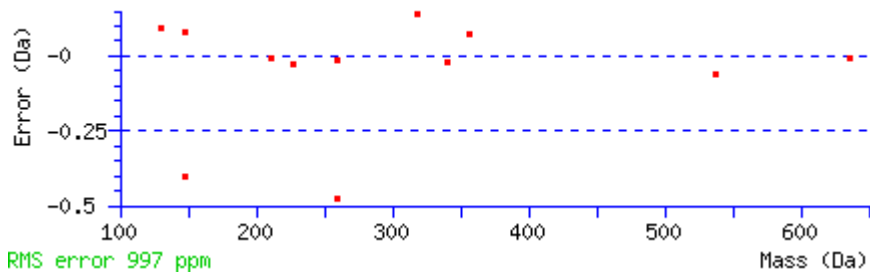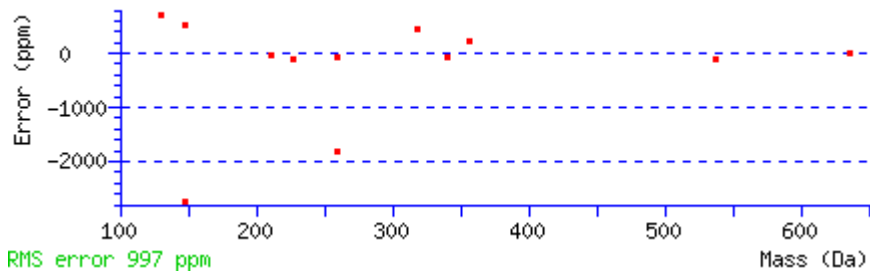

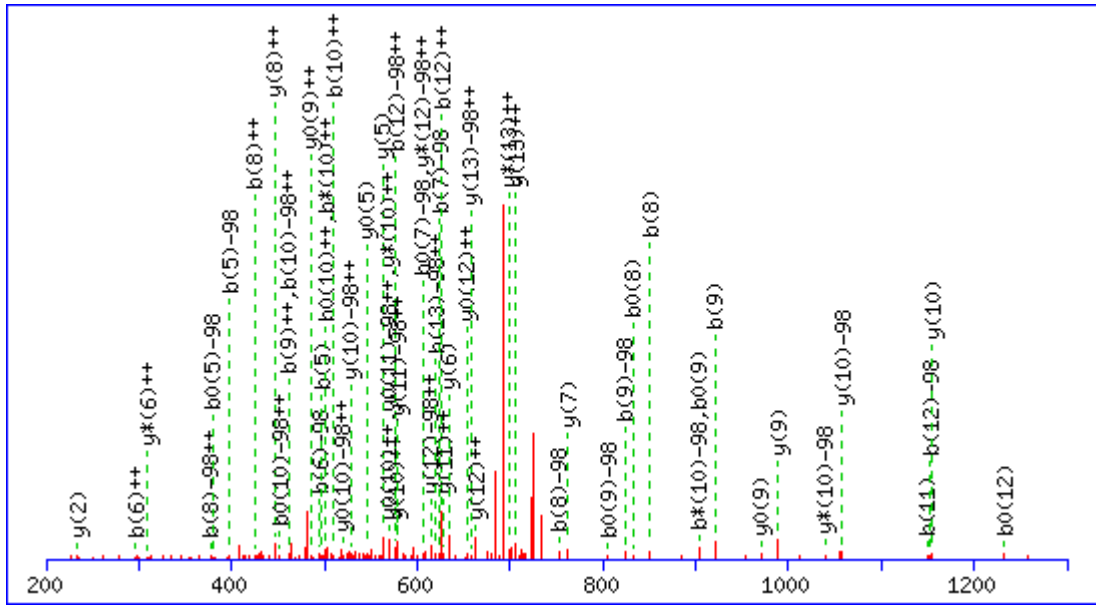

Monoisotopic mass of neutral peptide Mr(calc): 1482.6789 Fixed modifications: Carbamidomethyl (C) (apply to specified residues or termini only) Variable modifications: S5 : Phospho (ST), with neutral losses 97.9769 (shown in table), 0.0000 Ions Score: 28 Expect: 0.24 (help)

| #  | b         | b <sup>++</sup> | b <sup>*</sup> | b <sup>+++</sup> | b <sup>0</sup> | b <sup>0++</sup> | Seq. | y         | y <sup>++</sup> | y <sup>*</sup> | y <sup>+++</sup> | y <sup>0</sup> | y <sup>0++</sup> | #  |
|----|-----------|-----------------|----------------|------------------|----------------|------------------|------|-----------|-----------------|----------------|------------------|----------------|------------------|----|
| 1  | 72.0444   | 36.5258         |                |                  |                |                  | A    |           |                 |                |                  |                |                  | 14 |
| 2  | 159.0764  | 80.0418         |                |                  | 141.0659       | 71.0366          | S    | 1314.6722 | 657.8397        | 1297.6457      | 649.3265         | 1296.6616      | 648.8345         | 13 |
| 3  | 230.1135  | 115.5604        |                |                  | 212.1030       | 106.5551         | A    | 1227.6402 | 614.3237        | 1210.6136      | 605.8105         | 1209.6296      | 605.3184         | 12 |
| 4  | 329.1819  | 165.0946        |                |                  | 311.1714       | 156.0893         | V    | 1156.6031 | 578.8052        | 1139.5765      | 570.2919         | 1138.5925      | 569.7999         | 11 |
| 5  | 398.2034  | 199.6053        |                |                  | 380.1928       | 190.6001         | S    | 1057.5347 | 529.2710        | 1040.5081      | 520.7577         | 1039.5241      | 520.2657         | 10 |
| 6  | 495.2562  | 248.1317        |                |                  | 477.2456       | 239.1264         | P    | 988.5132  | 494.7602        | 971.4866       | 486.2470         | 970.5026       | 485.7550         | 9  |
| 7  | 624.2988  | 312.6530        |                |                  | 606.2882       | 303.6477         | E    | 891.4604  | 446.2339        | 874.4339       | 437.7206         | 873.4499       | 437.2286         | 8  |
| 8  | 752.3937  | 376.7005        | 735.3672       | 368.1872         | 734.3832       | 367.6952         | K    | 762.4178  | 381.7126        | 745.3913       | 373.1993         | 744.4073       | 372.7073         | 7  |
| 9  | 823.4308  | 412.2191        | 806.4043       | 403.7058         | 805.4203       | 403.2138         | A    | 634.3229  | 317.6651        | 617.2963       | 309.1518         | 616.3123       | 308.6598         | 6  |
| 10 | 920.4836  | 460.7454        | 903.4571       | 452.2322         | 902.4730       | 451.7402         | P    | 563.2858  | 282.1465        | 546.2592       | 273.6332         | 545.2752       | 273.1412         | 5  |
| 11 | 1051.5241 | 526.2657        | 1034.4975      | 517.7524         | 1033.5135      | 517.2604         | M    | 466.2330  | 233.6201        | 449.2064       | 225.1069         | 448.2224       | 224.6149         | 4  |
| 12 | 1152.5718 | 576.7895        | 1135.5452      | 568.2762         | 1134.5612      | 567.7842         | T    | 335.1925  | 168.0999        | 318.1660       | 159.5866         | 317.1819       | 159.0946         | 3  |
| 13 | 1239.6038 | 620.3055        | 1222.5773      | 611.7923         | 1221.5932      | 611.3003         | S    | 234.1448  | 117.5761        | 217.1183       | 109.0628         | 216.1343       | 108.5708         | 2  |
| 14 |           |                 |                |                  |                |                  | K    | 147.1128  | 74.0600         | 130.0863       | 65.5468          |                |                  | 1  |

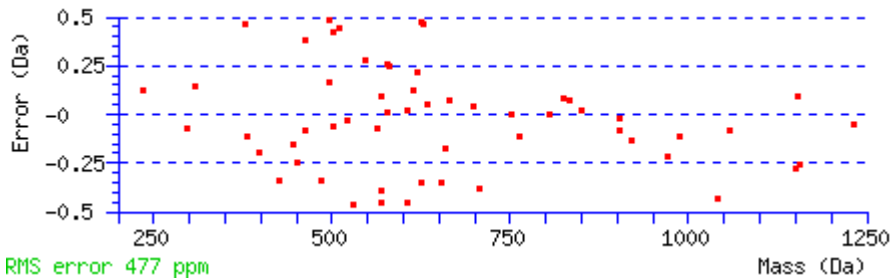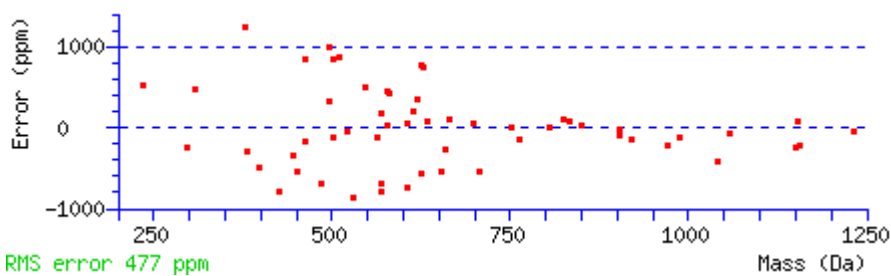

IDENTIFICATION 133

MS/MS Fragmentation of **KPLTSWILFAER**

Found in **IPI00756871**

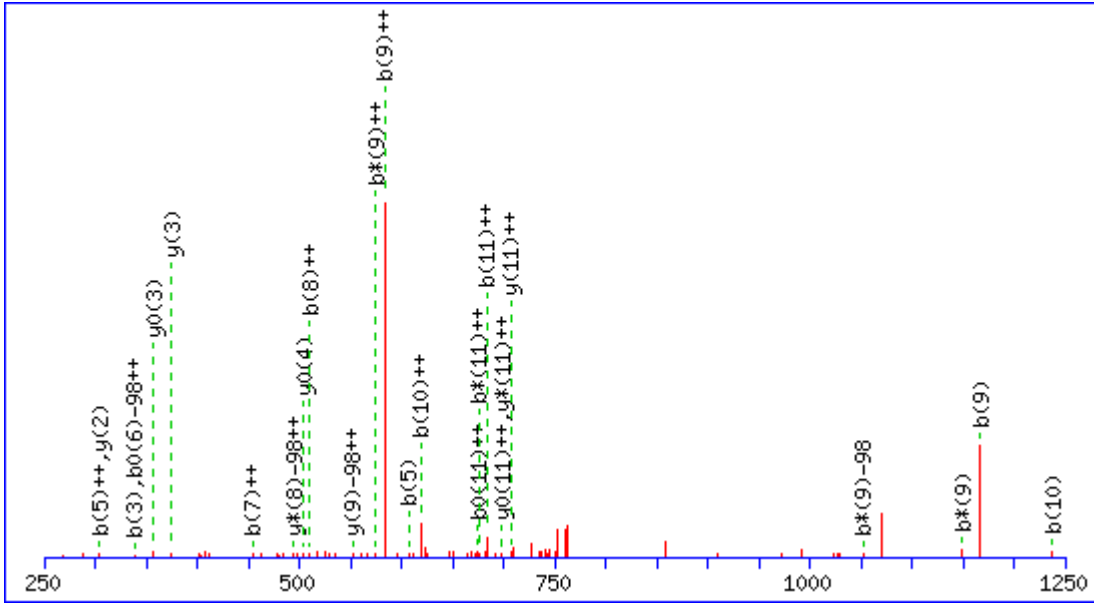

Monoisotopic mass of neutral peptide Mr(calc): 1539.7850 Fixed modifications: Carbamidomethyl (C) (apply to specified residues or termini only) Variable modifications: S5 : Phospho (ST), with neutral losses 0.0000(shown in table), 97.9769 Ions Score: 23 Expect: 0.37 (help)

| #  | b                | b <sup>++</sup> | b <sup>*</sup>   | b <sup>+++</sup> | b <sup>0</sup> | b <sup>0++</sup> | Seq. | y               | y <sup>++</sup> | y <sup>*</sup> | y <sup>+++</sup> | y <sup>0</sup>  | y <sup>0++</sup> | #  |
|----|------------------|-----------------|------------------|------------------|----------------|------------------|------|-----------------|-----------------|----------------|------------------|-----------------|------------------|----|
| 1  | 129.1022         | 65.0548         | 112.0757         | 56.5415          |                |                  | K    |                 |                 |                |                  |                 |                  | 12 |
| 2  | 226.1550         | 113.5811        | 209.1285         | 105.0679         |                |                  | P    | 1412.6974       | <b>706.8523</b> | 1395.6708      | <b>698.3391</b>  | 1394.6868       | <b>697.8470</b>  | 11 |
| 3  | <b>339.2391</b>  | 170.1232        | 322.2125         | 161.6099         |                |                  | L    | 1315.6446       | 658.3259        | 1298.6181      | 649.8127         | 1297.6341       | 649.3207         | 10 |
| 4  | 440.2867         | 220.6470        | 423.2602         | 212.1337         | 422.2762       | 211.6417         | T    | 1202.5606       | 601.7839        | 1185.5340      | 593.2706         | 1184.5500       | 592.7786         | 9  |
| 5  | <b>607.2851</b>  | <b>304.1462</b> | 590.2586         | 295.6329         | 589.2745       | 295.1409         | S    | 1101.5129       | 551.2601        | 1084.4863      | 542.7468         | 1083.5023       | 542.2548         | 8  |
| 6  | 793.3644         | 397.1858        | 776.3379         | 388.6726         | 775.3539       | 388.1806         | W    | 934.5145        | 467.7609        | 917.4880       | 459.2476         | 916.5039        | 458.7556         | 7  |
| 7  | 906.4485         | <b>453.7279</b> | 889.4219         | 445.2146         | 888.4379       | 444.7226         | I    | 748.4352        | 374.7212        | 731.4087       | 366.2080         | 730.4246        | 365.7160         | 6  |
| 8  | 1019.5325        | <b>510.2699</b> | 1002.5060        | 501.7566         | 1001.5220      | 501.2646         | L    | 635.3511        | 318.1792        | 618.3246       | 309.6659         | 617.3406        | 309.1739         | 5  |
| 9  | <b>1166.6010</b> | <b>583.8041</b> | <b>1149.5744</b> | <b>575.2908</b>  | 1148.5904      | 574.7988         | F    | 522.2671        | 261.6372        | 505.2405       | 253.1239         | <b>504.2565</b> | 252.6319         | 4  |
| 10 | <b>1237.6381</b> | <b>619.3227</b> | 1220.6115        | 610.8094         | 1219.6275      | 610.3174         | A    | <b>375.1987</b> | 188.1030        | 358.1721       | 179.5897         | <b>357.1881</b> | 179.0977         | 3  |
| 11 | 1366.6807        | <b>683.8440</b> | 1349.6541        | <b>675.3307</b>  | 1348.6701      | <b>674.8387</b>  | E    | <b>304.1615</b> | 152.5844        | 287.1350       | 144.0711         | 286.1510        | 143.5791         | 2  |
| 12 |                  |                 |                  |                  |                |                  | R    | 175.1190        | 88.0631         | 158.0924       | 79.5498          |                 |                  | 1  |

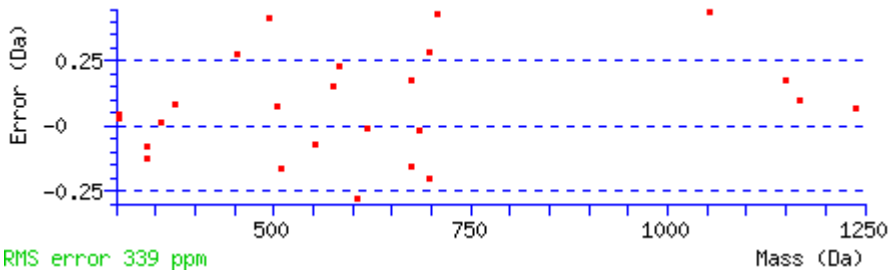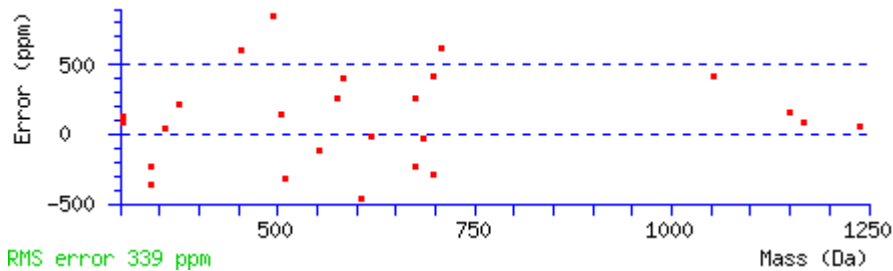

IDENTIFICATION 134

MS/MS Fragmentation of TSEDTS<sup>SG</sup>SPPKK

Found in IPI00399961

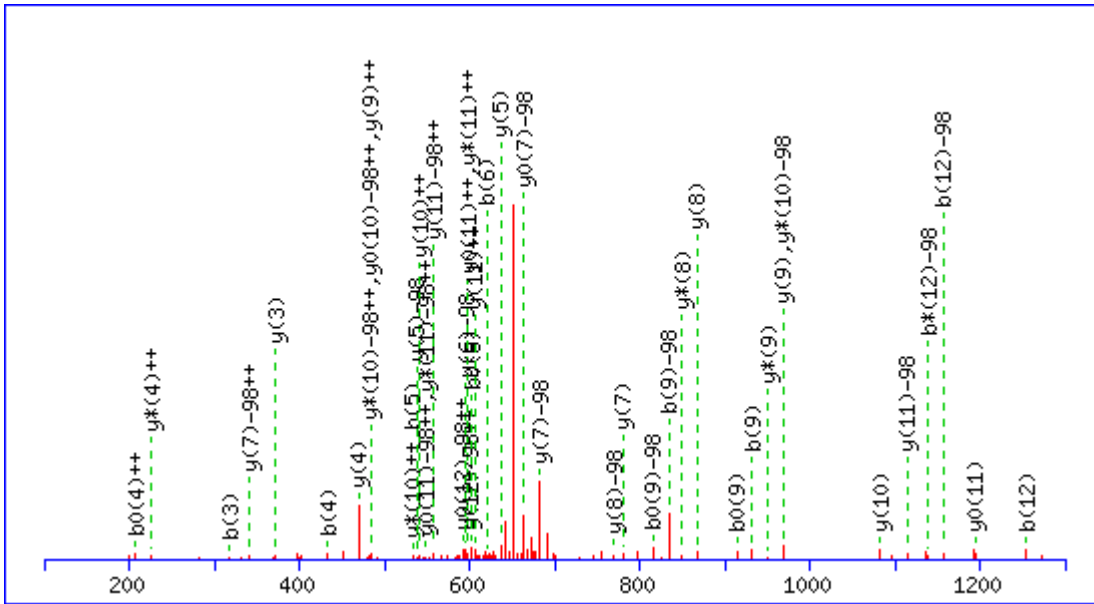

Monoisotopic mass of neutral peptide Mr(calc): 1399.5868 Fixed modifications: Carbamidomethyl (C) (apply to specified residues or termini only) Variable modifications: S9 : Phospho (ST), with neutral losses 97.9769 (shown in table), 0.0000 Ions Score: 31 Expect: 0.078 (help)

| #  | b         | b <sup>++</sup> | b <sup>*</sup> | b <sup>+++</sup> | b <sup>0</sup> | b <sup>0++</sup> | Seq. | y         | y <sup>++</sup> | y <sup>*</sup> | y <sup>+++</sup> | y <sub>0</sub> | y <sup>0++</sup> | #  |
|----|-----------|-----------------|----------------|------------------|----------------|------------------|------|-----------|-----------------|----------------|------------------|----------------|------------------|----|
| 1  | 102.0550  | 51.5311         |                |                  | 84.0444        | 42.5258          | T    |           |                 |                |                  |                |                  | 13 |
| 2  | 189.0870  | 95.0471         |                |                  | 171.0764       | 86.0418          | S    | 1201.5695 | 601.2884        | 1184.5430      | 592.7751         | 1183.5590      | 592.2831         | 12 |
| 3  | 318.1296  | 159.5684        |                |                  | 300.1190       | 150.5631         | E    | 1114.5375 | 557.7724        | 1097.5109      | 549.2591         | 1096.5269      | 548.7671         | 11 |
| 4  | 433.1565  | 217.0819        |                |                  | 415.1460       | 208.0766         | D    | 985.4949  | 493.2511        | 968.4684       | 484.7378         | 967.4843       | 484.2458         | 10 |
| 5  | 534.2042  | 267.6057        |                |                  | 516.1936       | 258.6005         | T    | 870.4680  | 435.7376        | 853.4414       | 427.2243         | 852.4574       | 426.7323         | 9  |
| 6  | 621.2362  | 311.1218        |                |                  | 603.2257       | 302.1165         | S    | 769.4203  | 385.2138        | 752.3937       | 376.7005         | 751.4097       | 376.2085         | 8  |
| 7  | 708.2683  | 354.6378        |                |                  | 690.2577       | 345.6325         | S    | 682.3883  | 341.6978        | 665.3617       | 333.1845         | 664.3777       | 332.6925         | 7  |
| 8  | 765.2897  | 383.1485        |                |                  | 747.2792       | 374.1432         | G    | 595.3562  | 298.1817        | 578.3297       | 289.6685         | 577.3457       | 289.1765         | 6  |
| 9  | 834.3112  | 417.6592        |                |                  | 816.3006       | 408.6539         | S    | 538.3348  | 269.6710        | 521.3082       | 261.1577         | 520.3242       | 260.6657         | 5  |
| 10 | 931.3639  | 466.1856        |                |                  | 913.3534       | 457.1803         | P    | 469.3133  | 235.1603        | 452.2867       | 226.6470         |                |                  | 4  |
| 11 | 1028.4167 | 514.7120        |                |                  | 1010.4061      | 505.7067         | P    | 372.2605  | 186.6339        | 355.2340       | 178.1206         |                |                  | 3  |
| 12 | 1156.5117 | 578.7595        | 1139.4851      | 570.2462         | 1138.5011      | 569.7542         | K    | 275.2078  | 138.1075        | 258.1812       | 129.5942         |                |                  | 2  |
| 13 |           |                 |                |                  |                |                  | K    | 147.1128  | 74.0600         | 130.0863       | 65.5468          |                |                  | 1  |

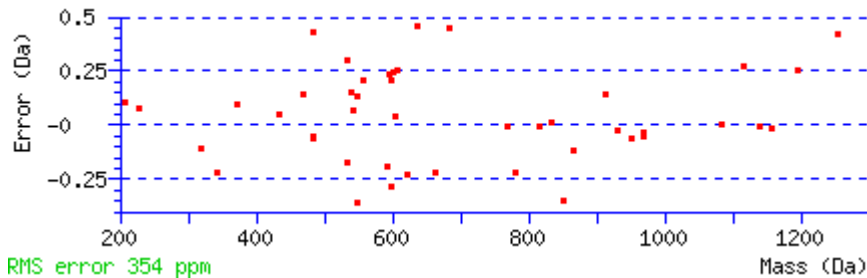

RMS error 354 ppm

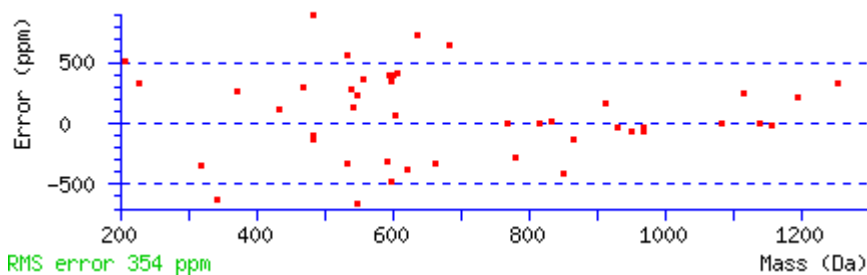

RMS error 354 ppm



IDENTIFICATION 135

MS/MS Fragmentation of SEAAPAAPAAPPAEK

Found in IPI00223713

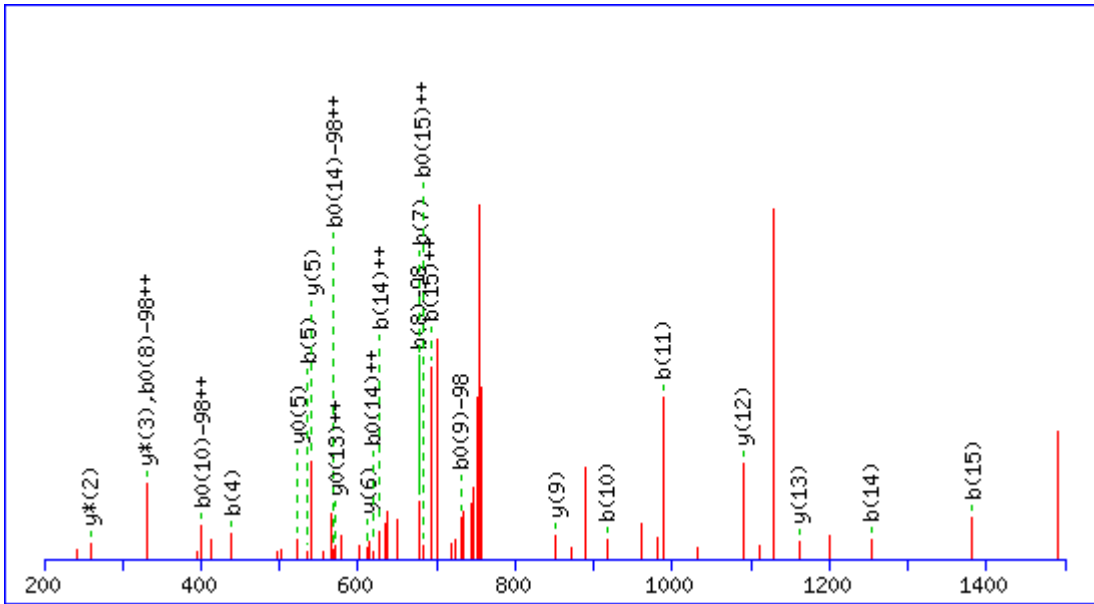

Monoisotopic mass of neutral peptide Mr(calc): 1527.6970 Fixed modifications: Carbamidomethyl (C) (apply to specified residues or termini only) Variable modifications: S1 : Phospho (ST), with neutral losses 0.0000 (shown in table), 97.9769 Ions Score: 27 Expect: 0.27 (help)

| #  | b         | b <sup>++</sup> | b <sup>0</sup> | b <sup>0++</sup> | Seq. | y         | y <sup>++</sup> | y <sup>*</sup> | y <sup>+++</sup> | y <sup>0</sup> | y <sup>0++</sup> | #  |
|----|-----------|-----------------|----------------|------------------|------|-----------|-----------------|----------------|------------------|----------------|------------------|----|
| 1  | 168.0056  | 84.5065         | 149.9951       | 75.5012          | S    |           |                 |                |                  |                |                  | 16 |
| 2  | 297.0482  | 149.0278        | 279.0377       | 140.0225         | E    | 1361.7060 | 681.3566        | 1344.6794      | 672.8433         | 1343.6954      | 672.3513         | 15 |
| 3  | 368.0853  | 184.5463        | 350.0748       | 175.5410         | A    | 1232.6634 | 616.8353        | 1215.6368      | 608.3220         | 1214.6528      | 607.8300         | 14 |
| 4  | 439.1225  | 220.0649        | 421.1119       | 211.0596         | A    | 1161.6263 | 581.3168        | 1144.5997      | 572.8035         | 1143.6157      | 572.3115         | 13 |
| 5  | 536.1752  | 268.5912        | 518.1647       | 259.5860         | P    | 1090.5891 | 545.7982        | 1073.5626      | 537.2849         | 1072.5786      | 536.7929         | 12 |
| 6  | 607.2123  | 304.1098        | 589.2018       | 295.1045         | A    | 993.5364  | 497.2718        | 976.5098       | 488.7585         | 975.5258       | 488.2665         | 11 |
| 7  | 678.2494  | 339.6284        | 660.2389       | 330.6231         | A    | 922.4993  | 461.7533        | 905.4727       | 453.2400         | 904.4887       | 452.7480         | 10 |
| 8  | 775.3022  | 388.1547        | 757.2916       | 379.1495         | P    | 851.4621  | 426.2347        | 834.4356       | 417.7214         | 833.4516       | 417.2294         | 9  |
| 9  | 846.3393  | 423.6733        | 828.3288       | 414.6680         | A    | 754.4094  | 377.7083        | 737.3828       | 369.1951         | 736.3988       | 368.7030         | 8  |
| 10 | 917.3764  | 459.1919        | 899.3659       | 450.1866         | A    | 683.3723  | 342.1898        | 666.3457       | 333.6765         | 665.3617       | 333.1845         | 7  |
| 11 | 988.4136  | 494.7104        | 970.4030       | 485.7051         | A    | 612.3352  | 306.6712        | 595.3086       | 298.1579         | 594.3246       | 297.6659         | 6  |
| 12 | 1085.4663 | 543.2368        | 1067.4558      | 534.2315         | P    | 541.2980  | 271.1527        | 524.2715       | 262.6394         | 523.2875       | 262.1474         | 5  |
| 13 | 1182.5191 | 591.7632        | 1164.5085      | 582.7579         | P    | 444.2453  | 222.6263        | 427.2187       | 214.1130         | 426.2347       | 213.6210         | 4  |
| 14 | 1253.5562 | 627.2817        | 1235.5456      | 618.2765         | A    | 347.1925  | 174.0999        | 330.1660       | 165.5866         | 329.1819       | 165.0946         | 3  |
| 15 | 1382.5988 | 691.8030        | 1364.5882      | 682.7977         | E    | 276.1554  | 138.5813        | 259.1288       | 130.0681         | 258.1448       | 129.5761         | 2  |
| 16 |           |                 |                |                  | K    | 147.1128  | 74.0600         | 130.0863       | 65.5468          |                |                  | 1  |

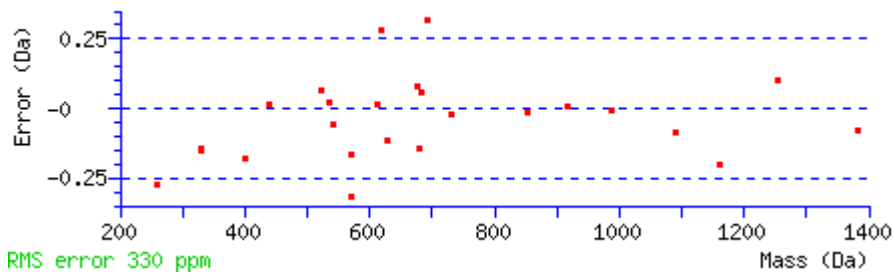

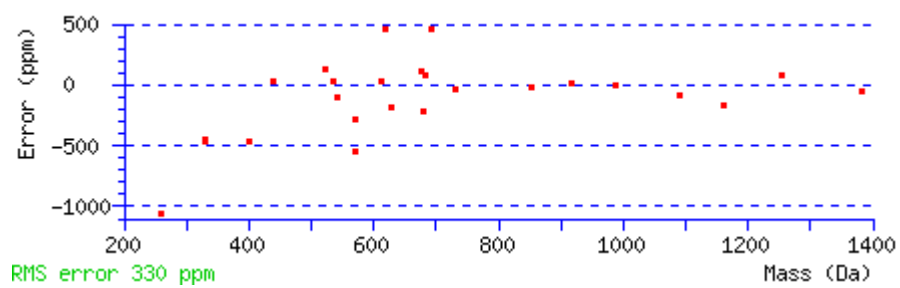

IDENTIFICATION 136  
MS/MS Fragmentation of  
AEDEILNRSR

Found in IPI00119618

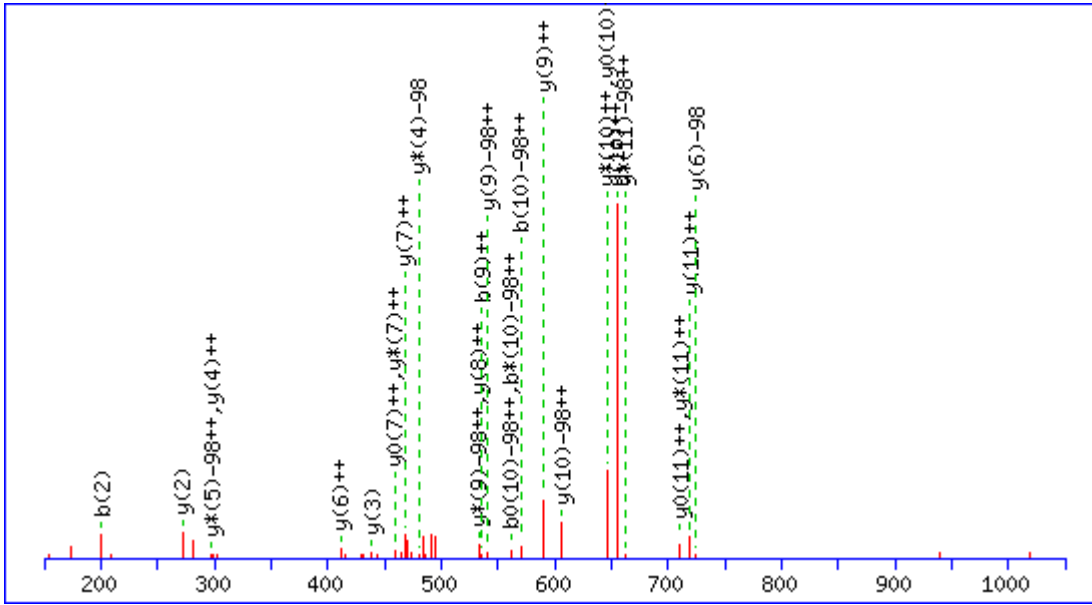

Monoisotopic mass of neutral peptide Mr(calc):

1507.6667

Fixed modifications:

Carbamidomethyl (C) (apply to specified residues or termini only)

Variable modifications:

S10 :

Phospho (ST), with neutral losses 0.0000 (shown in table), 97.9769

Ions Score:

29

Expect:

0.17 (

help

)

| #  | b         | b <sup>++</sup> | b <sup>*</sup> | b <sup>+++</sup> | b <sup>0</sup> | b <sup>0++</sup> | Seq. | y         | y <sup>++</sup> | y <sup>*</sup> | y <sup>+++</sup> | y <sup>0</sup> | y <sup>0++</sup> | #  |
|----|-----------|-----------------|----------------|------------------|----------------|------------------|------|-----------|-----------------|----------------|------------------|----------------|------------------|----|
| 1  | 72.0444   | 36.5258         |                |                  |                |                  | A    |           |                 |                |                  |                |                  | 12 |
| 2  | 201.0870  | 101.0471        |                |                  | 183.0764       | 92.0418          | E    | 1437.6370 | 719.3221        | 1420.6104      | 710.8088         | 1419.6264      | 710.3168         | 11 |
| 3  | 330.1296  | 165.5684        |                |                  | 312.1190       | 156.5631         | E    | 1308.5944 | 654.8008        | 1291.5678      | 646.2875         | 1290.5838      | 645.7955         | 10 |
| 4  | 445.1565  | 223.0819        |                |                  | 427.1460       | 214.0766         | D    | 1179.5518 | 590.2795        | 1162.5252      | 581.7663         | 1161.5412      | 581.2742         | 9  |
| 5  | 574.1991  | 287.6032        |                |                  | 556.1885       | 278.5979         | E    | 1064.5248 | 532.7661        | 1047.4983      | 524.2528         | 1046.5143      | 523.7608         | 8  |
| 6  | 687.2832  | 344.1452        |                |                  | 669.2726       | 335.1399         | I    | 935.4822  | 468.2448        | 918.4557       | 459.7315         | 917.4717       | 459.2395         | 7  |
| 7  | 800.3672  | 400.6873        |                |                  | 782.3567       | 391.6820         | L    | 822.3982  | 411.7027        | 805.3716       | 403.1895         | 804.3876       | 402.6974         | 6  |
| 8  | 914.4102  | 457.7087        | 897.3836       | 449.1954         | 896.3996       | 448.7034         | N    | 709.3141  | 355.1607        | 692.2876       | 346.6474         | 691.3035       | 346.1554         | 5  |
| 9  | 1070.5113 | 535.7593        | 1053.4847      | 527.2460         | 1052.5007      | 526.7540         | R    | 595.2712  | 298.1392        | 578.2446       | 289.6260         | 577.2606       | 289.1339         | 4  |
| 10 | 1237.5096 | 619.2585        | 1220.4831      | 610.7452         | 1219.4991      | 610.2532         | S    | 439.1701  | 220.0887        | 422.1435       | 211.5754         | 421.1595       | 211.0834         | 3  |
| 11 | 1334.5624 | 667.7848        | 1317.5359      | 659.2716         | 1316.5518      | 658.7796         | P    | 272.1717  | 136.5895        | 255.1452       | 128.0762         |                |                  | 2  |
| 12 |           |                 |                |                  |                |                  | R    | 175.1190  | 88.0631         | 158.0924       | 79.5498          |                |                  | 1  |

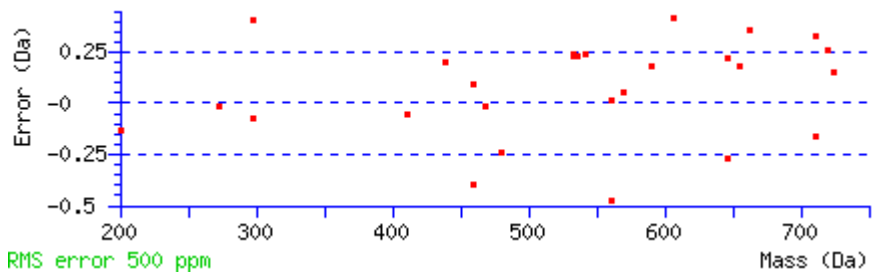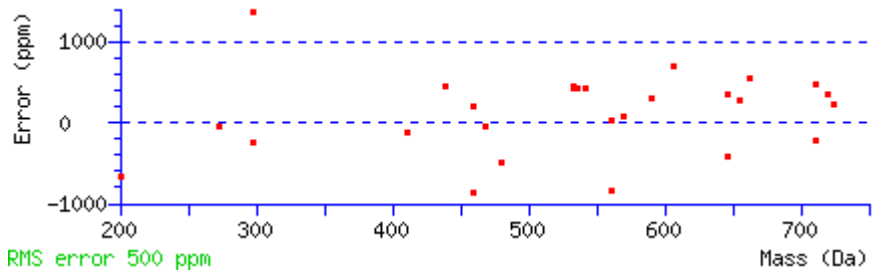

IDENTIFICATION 137  
MS/MS Fragmentation of  
SGAQASSTPLSPTR

Found in IPI00400300

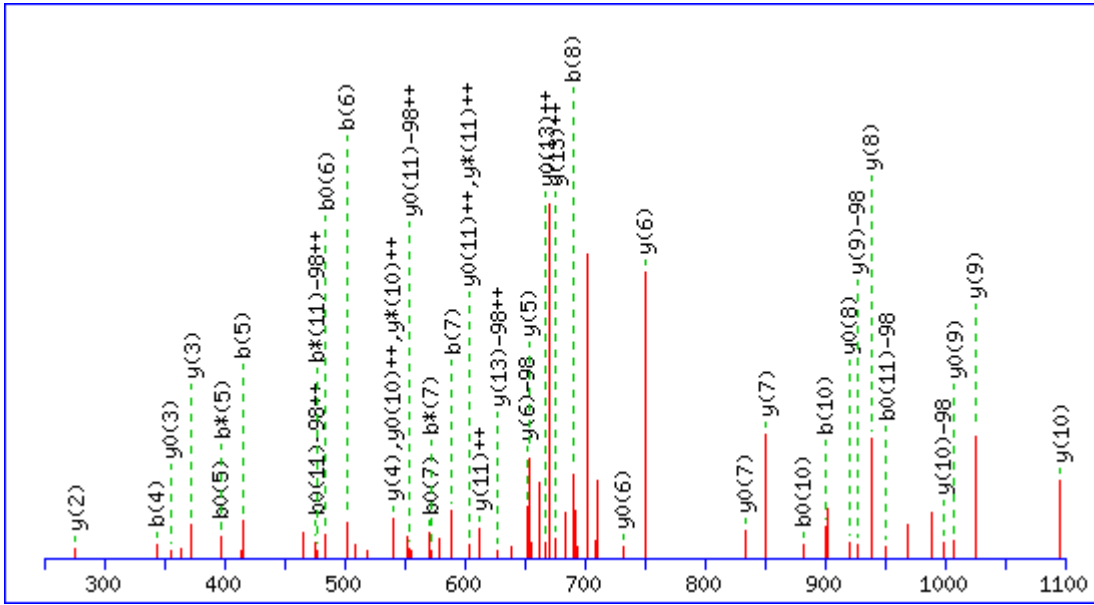

Monoisotopic mass of neutral peptide Mr(calc): 1438.6453

Fixed modifications: Carbamidomethyl (C) (apply to specified residues or termini only)

Variable modifications:

S11 : Phospho (ST), with neutral losses 0.0000(shown in table), 97.9769

Ions Score: 69 Expect: 1.7e-05 (help)

| #  | b         | b <sup>++</sup> | b <sup>*</sup> | b <sup>+++</sup> | b <sup>0</sup> | b <sup>0++</sup> | Seq. | y         | y <sup>++</sup> | y <sup>*</sup> | y <sup>+++</sup> | y <sup>0</sup> | y <sup>0++</sup> | #  |
|----|-----------|-----------------|----------------|------------------|----------------|------------------|------|-----------|-----------------|----------------|------------------|----------------|------------------|----|
| 1  | 88.0393   | 44.5233         |                |                  | 70.0287        | 35.5180          | S    |           |                 |                |                  |                |                  | 14 |
| 2  | 145.0608  | 73.0340         |                |                  | 127.0502       | 64.0287          | G    | 1352.6206 | 676.8139        | 1335.5940      | 668.3007         | 1334.6100      | 667.8086         | 13 |
| 3  | 216.0979  | 108.5526        |                |                  | 198.0873       | 99.5473          | A    | 1295.5991 | 648.3032        | 1278.5726      | 639.7899         | 1277.5886      | 639.2979         | 12 |
| 4  | 344.1565  | 172.5819        | 327.1299       | 164.0686         | 326.1459       | 163.5766         | Q    | 1224.5620 | 612.7846        | 1207.5355      | 604.2714         | 1206.5514      | 603.7794         | 11 |
| 5  | 415.1936  | 208.1004        | 398.1670       | 199.5872         | 397.1830       | 199.0951         | A    | 1096.5034 | 548.7554        | 1079.4769      | 540.2421         | 1078.4929      | 539.7501         | 10 |
| 6  | 502.2256  | 251.6164        | 485.1991       | 243.1032         | 484.2150       | 242.6112         | S    | 1025.4663 | 513.2368        | 1008.4398      | 504.7235         | 1007.4558      | 504.2315         | 9  |
| 7  | 589.2576  | 295.1325        | 572.2311       | 286.6192         | 571.2471       | 286.1272         | S    | 938.4343  | 469.7208        | 921.4077       | 461.2075         | 920.4237       | 460.7155         | 8  |
| 8  | 690.3053  | 345.6563        | 673.2788       | 337.1430         | 672.2947       | 336.6510         | T    | 851.4023  | 426.2048        | 834.3757       | 417.6915         | 833.3917       | 417.1995         | 7  |
| 9  | 787.3581  | 394.1827        | 770.3315       | 385.6694         | 769.3475       | 385.1774         | P    | 750.3546  | 375.6809        | 733.3280       | 367.1677         | 732.3440       | 366.6756         | 6  |
| 10 | 900.4421  | 450.7247        | 883.4156       | 442.2114         | 882.4316       | 441.7194         | L    | 653.3018  | 327.1545        | 636.2753       | 318.6413         | 635.2913       | 318.1493         | 5  |
| 11 | 1067.4405 | 534.2239        | 1050.4139      | 525.7106         | 1049.4299      | 525.2186         | S    | 540.2178  | 270.6125        | 523.1912       | 262.0992         | 522.2072       | 261.6072         | 4  |
| 12 | 1164.4933 | 582.7503        | 1147.4667      | 574.2370         | 1146.4827      | 573.7450         | P    | 373.2194  | 187.1133        | 356.1928       | 178.6001         | 355.2088       | 178.1081         | 3  |
| 13 | 1265.5409 | 633.2741        | 1248.5144      | 624.7608         | 1247.5304      | 624.2688         | T    | 276.1666  | 138.5870        | 259.1401       | 130.0737         | 258.1561       | 129.5817         | 2  |
| 14 |           |                 |                |                  |                |                  | R    | 175.1190  | 88.0631         | 158.0924       | 79.5498          |                |                  | 1  |

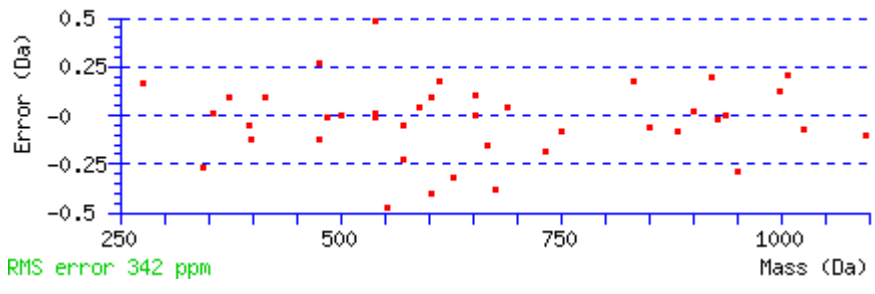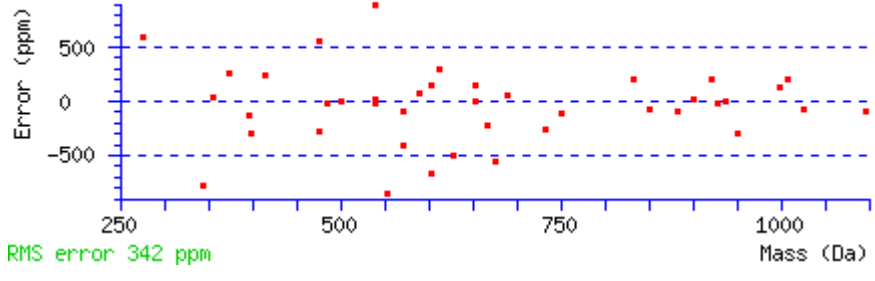

IDENTIFICATION 138

MS/MS Fragmentation of **SETAPAAPAPAEK**

Found in **IPI00223714**

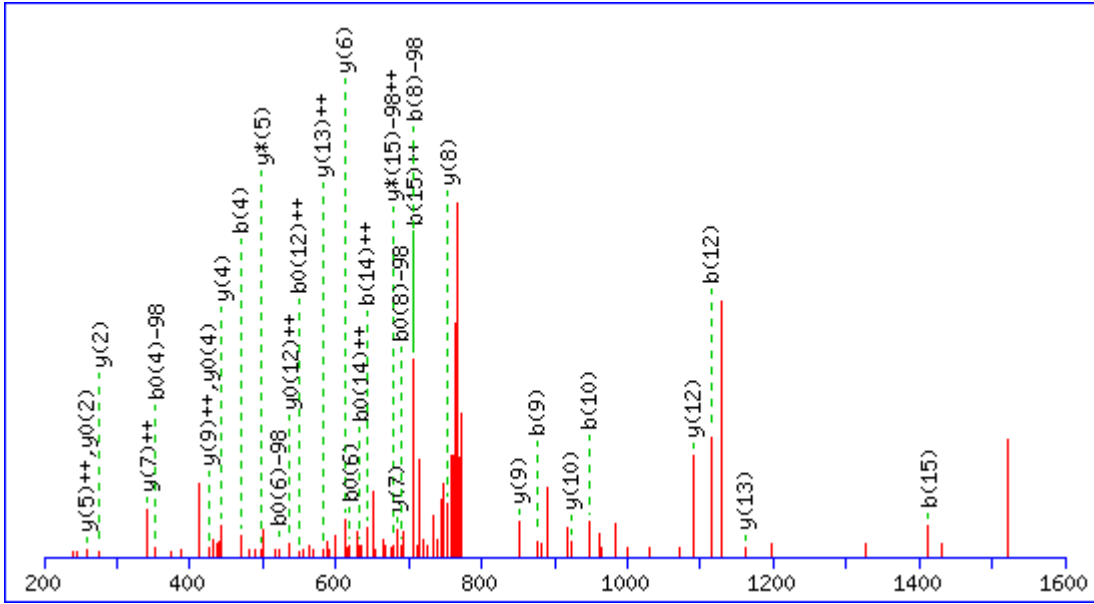

Monoisotopic mass of neutral peptide Mr(calc): 1557.7076

Fixed modifications: Carbamidomethyl (C) (apply to specified residues or termini only)

Variable modifications:

T3 : Phospho (ST), with neutral losses 0.0000(shown in table), 97.9769

Ions Score: 33 Expect: 0.072 (help)

| #  | b                | b <sup>++</sup> | b <sup>0</sup>  | b <sup>0++</sup> | Seq. | y                | y <sup>++</sup> | y <sup>*</sup>  | y <sup>+++</sup> | y <sup>0</sup>  | y <sup>0++</sup> | #  |
|----|------------------|-----------------|-----------------|------------------|------|------------------|-----------------|-----------------|------------------|-----------------|------------------|----|
| 1  | 88.0393          | 44.5233         | 70.0287         | 35.5180          | S    |                  |                 |                 |                  |                 |                  | 16 |
| 2  | 217.0819         | 109.0446        | 199.0713        | 100.0393         | E    | 1471.6829        | 736.3451        | 1454.6563       | 727.8318         | 1453.6723       | 727.3398         | 15 |
| 3  | 398.0959         | 199.5516        | 380.0853        | 190.5463         | T    | 1342.6403        | 671.8238        | 1325.6137       | 663.3105         | 1324.6297       | 662.8185         | 14 |
| 4  | <b>469.1330</b>  | 235.0701        | 451.1225        | 226.0649         | A    | <b>1161.6263</b> | <b>581.3168</b> | 1144.5997       | 572.8035         | 1143.6157       | 572.3115         | 13 |
| 5  | 566.1858         | 283.5965        | 548.1752        | 274.5912         | P    | <b>1090.5891</b> | 545.7982        | 1073.5626       | 537.2849         | 1072.5786       | <b>536.7929</b>  | 12 |
| 6  | 637.2229         | 319.1151        | <b>619.2123</b> | 310.1098         | A    | 993.5364         | 497.2718        | 976.5098        | 488.7586         | 975.5258        | 488.2665         | 11 |
| 7  | 708.2600         | 354.6336        | 690.2494        | 345.6284         | A    | <b>922.4993</b>  | 461.7533        | 905.4727        | 453.2400         | 904.4887        | 452.7480         | 10 |
| 8  | 805.3128         | 403.1600        | 787.3022        | 394.1547         | P    | <b>851.4621</b>  | <b>426.2347</b> | 834.4356        | 417.7214         | 833.4516        | 417.2294         | 9  |
| 9  | <b>876.3499</b>  | 438.6786        | 858.3393        | 429.6733         | A    | <b>754.4094</b>  | 377.7083        | 737.3828        | 369.1951         | 736.3988        | 368.7030         | 8  |
| 10 | <b>947.3870</b>  | 474.1971        | 929.3764        | 465.1919         | A    | <b>683.3723</b>  | <b>342.1898</b> | 666.3457        | 333.6765         | 665.3617        | 333.1845         | 7  |
| 11 | 1044.4398        | 522.7235        | 1026.4292       | 513.7182         | P    | <b>612.3352</b>  | 306.6712        | 595.3086        | 298.1579         | 594.3246        | 297.6659         | 6  |
| 12 | <b>1115.4769</b> | 558.2421        | 1097.4663       | <b>549.2368</b>  | A    | 515.2824         | <b>258.1448</b> | <b>498.2558</b> | 249.6316         | 497.2718        | 249.1396         | 5  |
| 13 | 1212.5296        | 606.7685        | 1194.5191       | 597.7632         | P    | <b>444.2453</b>  | 222.6263        | 427.2187        | 214.1130         | <b>426.2347</b> | 213.6210         | 4  |
| 14 | 1283.5668        | <b>642.2870</b> | 1265.5562       | <b>633.2817</b>  | A    | 347.1925         | 174.0999        | 330.1660        | 165.5866         | 329.1819        | 165.0946         | 3  |
| 15 | <b>1412.6094</b> | <b>706.8083</b> | 1394.5988       | 697.8030         | E    | <b>276.1554</b>  | 138.5813        | 259.1288        | 130.0681         | <b>258.1448</b> | 129.5761         | 2  |
| 16 |                  |                 |                 |                  | K    | 147.1128         | 74.0600         | 130.0863        | 65.5468          |                 |                  | 1  |

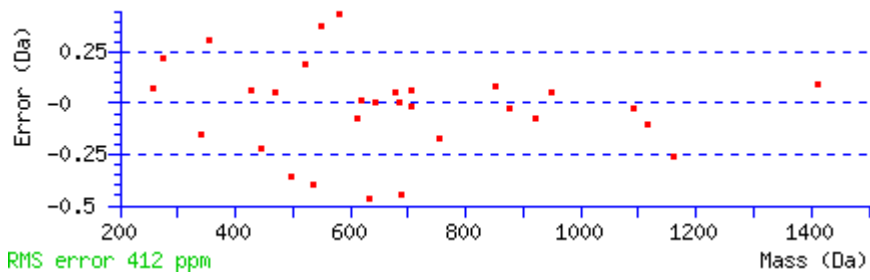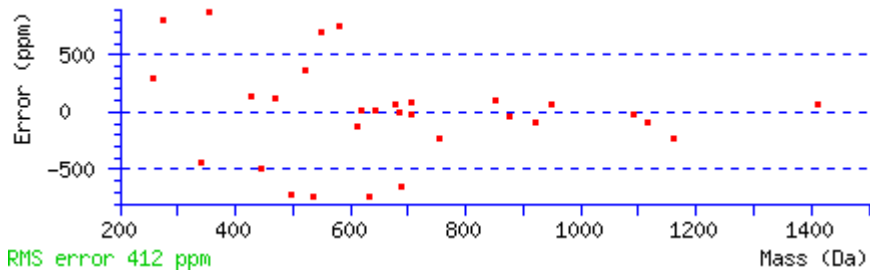



MS/MS Fragmentation of  
**RLSSLR**

Found in

**IPI00108454**

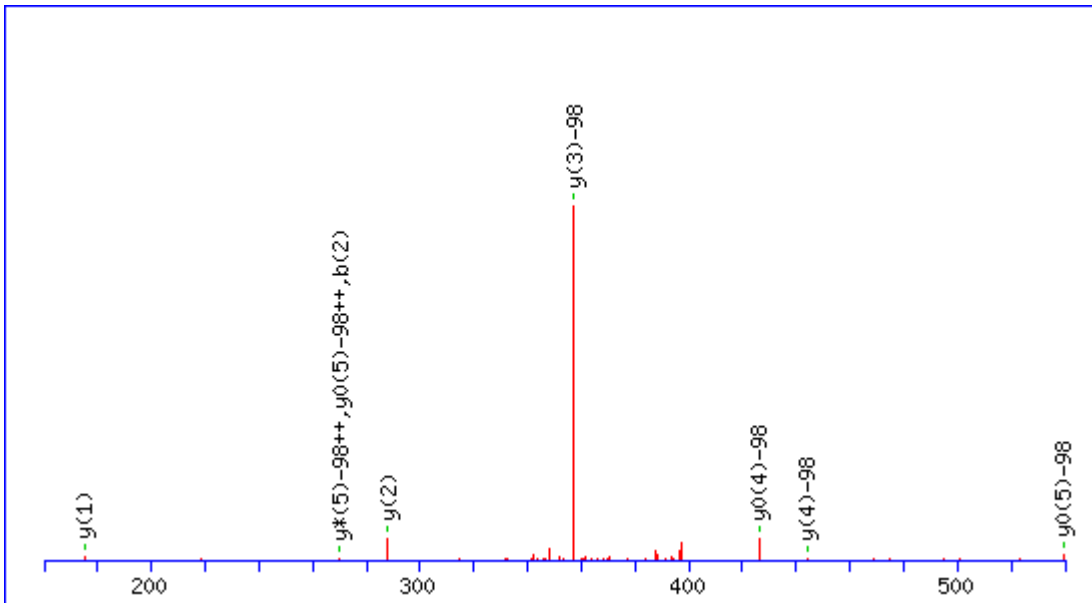

Monoisotopic mass of neutral peptide  $M_r(\text{calc})$ : 810.4113 Fixed modifications: Carbamidomethyl (C) (apply to specified residues or termini only) Variable modifications: S4 : Phospho (ST), with neutral losses 97.9769 (shown in table), 0.0000 Ions Score: 38 Expect: 0.0065 (help)

| # | b        | b <sup>++</sup> | b <sup>*</sup> | b <sup>+++</sup> | b <sup>0</sup> | b <sup>0++</sup> | Seq. | y        | y <sup>++</sup> | y <sup>*</sup> | y <sup>+++</sup> | y <sup>0</sup> | y <sup>0++</sup> | # |
|---|----------|-----------------|----------------|------------------|----------------|------------------|------|----------|-----------------|----------------|------------------|----------------|------------------|---|
| 1 | 157.1084 | 79.0578         | 140.0818       | 70.5446          |                |                  | R    |          |                 |                |                  |                |                  | 6 |
| 2 | 270.1925 | 135.5999        | 253.1659       | 127.0866         |                |                  | L    | 557.3406 | 279.1739        | 540.3140       | 270.6606         | 539.3300       | 270.1686         | 5 |
| 3 | 357.2245 | 179.1159        | 340.1979       | 170.6026         | 339.2139       | 170.1106         | S    | 444.2565 | 222.6319        | 427.2300       | 214.1186         | 426.2459       | 213.6266         | 4 |
| 4 | 426.2459 | 213.6266        | 409.2194       | 205.1133         | 408.2354       | 204.6213         | S    | 357.2245 | 179.1159        | 340.1979       | 170.6026         | 339.2139       | 170.1106         | 3 |
| 5 | 539.3300 | 270.1686        | 522.3035       | 261.6554         | 521.3194       | 261.1634         | L    | 288.2030 | 144.6051        | 271.1765       | 136.0919         |                |                  | 2 |
| 6 |          |                 |                |                  |                |                  | R    | 175.1190 | 88.0631         | 158.0924       | 79.5498          |                |                  | 1 |

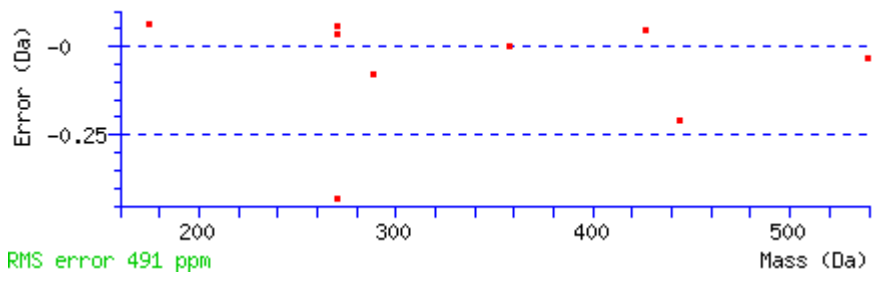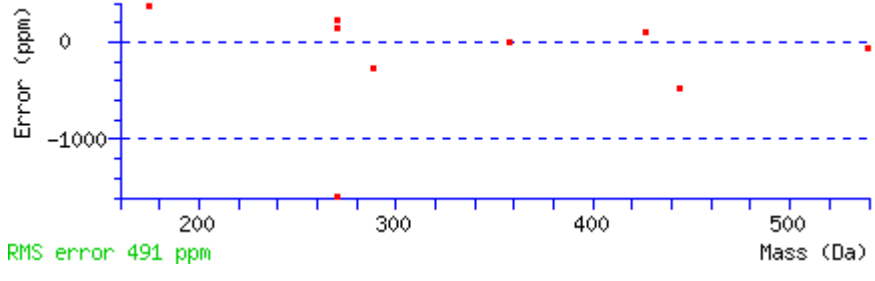

IDENTIFICATION 140

MS/MS Fragmentation of **LRSEDDGVEGDLGETQSR**

Found in **IPI00553798**

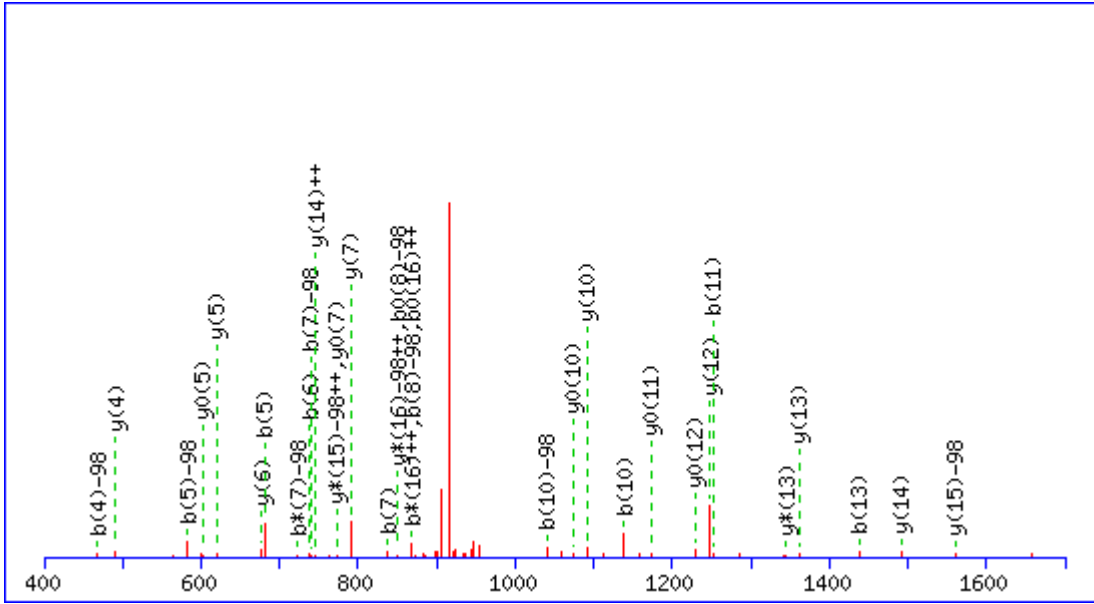

Monoisotopic mass of neutral peptide Mr(calc): 1926.8320 Fixed modifications: Carbamidomethyl (C) (apply to specified residues or termini only) Variable modifications: S3 : Phospho (ST), with neutral losses 97.9769 (shown in table), 0.0000 Ions Score: 67 Expect: 3.8e-05 (help)

| #  | b         | b <sup>++</sup> | b <sup>*</sup> | b <sup>+++</sup> | b <sup>0</sup> | b <sup>0++</sup> | Seq. | y         | y <sup>++</sup> | y <sup>*</sup> | y <sup>+++</sup> | y <sup>0</sup> | y <sup>0++</sup> | #  |
|----|-----------|-----------------|----------------|------------------|----------------|------------------|------|-----------|-----------------|----------------|------------------|----------------|------------------|----|
| 1  | 114.0913  | 57.5493         |                |                  |                |                  | L    |           |                 |                |                  |                |                  | 17 |
| 2  | 270.1925  | 135.5999        | 253.1659       | 127.0866         |                |                  | R    | 1716.7783 | 858.8928        | 1699.7518      | 850.3795         | 1698.7678      | 849.8875         | 16 |
| 3  | 339.2139  | 170.1106        | 322.1874       | 161.5973         | 321.2033       | 161.1053         | S    | 1560.6772 | 780.8423        | 1543.6507      | 772.3290         | 1542.6667      | 771.8370         | 15 |
| 4  | 468.2565  | 234.6319        | 451.2300       | 226.1186         | 450.2459       | 225.6266         | E    | 1491.6558 | 746.3315        | 1474.6292      | 737.8182         | 1473.6452      | 737.3262         | 14 |
| 5  | 583.2835  | 292.1454        | 566.2569       | 283.6321         | 565.2729       | 283.1401         | D    | 1362.6132 | 681.8102        | 1345.5866      | 673.2970         | 1344.6026      | 672.8049         | 13 |
| 6  | 640.3049  | 320.6561        | 623.2784       | 312.1428         | 622.2943       | 311.6508         | G    | 1247.5862 | 624.2968        | 1230.5597      | 615.7835         | 1229.5757      | 615.2915         | 12 |
| 7  | 739.3733  | 370.1903        | 722.3468       | 361.6770         | 721.3628       | 361.1850         | V    | 1190.5648 | 595.7860        | 1173.5382      | 587.2727         | 1172.5542      | 586.7807         | 11 |
| 8  | 868.4159  | 434.7116        | 851.3894       | 426.1983         | 850.4054       | 425.7063         | E    | 1091.4964 | 546.2518        | 1074.4698      | 537.7385         | 1073.4858      | 537.2465         | 10 |
| 9  | 925.4374  | 463.2223        | 908.4108       | 454.7091         | 907.4268       | 454.2170         | G    | 962.4538  | 481.7305        | 945.4272       | 473.2172         | 944.4432       | 472.7252         | 9  |
| 10 | 1040.4643 | 520.7358        | 1023.4378      | 512.2225         | 1022.4538      | 511.7305         | D    | 905.4323  | 453.2198        | 888.4058       | 444.7065         | 887.4217       | 444.2145         | 8  |
| 11 | 1153.5484 | 577.2778        | 1136.5218      | 568.7646         | 1135.5378      | 568.2726         | L    | 790.4054  | 395.7063        | 773.3788       | 387.1930         | 772.3948       | 386.7010         | 7  |
| 12 | 1210.5699 | 605.7886        | 1193.5433      | 597.2753         | 1192.5593      | 596.7833         | G    | 677.3213  | 339.1643        | 660.2947       | 330.6510         | 659.3107       | 330.1590         | 6  |
| 13 | 1339.6124 | 670.3099        | 1322.5859      | 661.7966         | 1321.6019      | 661.3046         | E    | 620.2998  | 310.6536        | 603.2733       | 302.1403         | 602.2893       | 301.6483         | 5  |
| 14 | 1440.6601 | 720.8337        | 1423.6336      | 712.3204         | 1422.6496      | 711.8284         | T    | 491.2572  | 246.1323        | 474.2307       | 237.6190         | 473.2467       | 237.1270         | 4  |
| 15 | 1568.7187 | 784.8630        | 1551.6922      | 776.3497         | 1550.7081      | 775.8577         | Q    | 390.2096  | 195.6084        | 373.1830       | 187.0951         | 372.1990       | 186.6031         | 3  |
| 16 | 1655.7507 | 828.3790        | 1638.7242      | 819.8657         | 1637.7402      | 819.3737         | S    | 262.1510  | 131.5791        | 245.1244       | 123.0659         | 244.1404       | 122.5738         | 2  |
| 17 |           |                 |                |                  |                |                  | R    | 175.1190  | 88.0631         | 158.0924       | 79.5498          |                |                  | 1  |

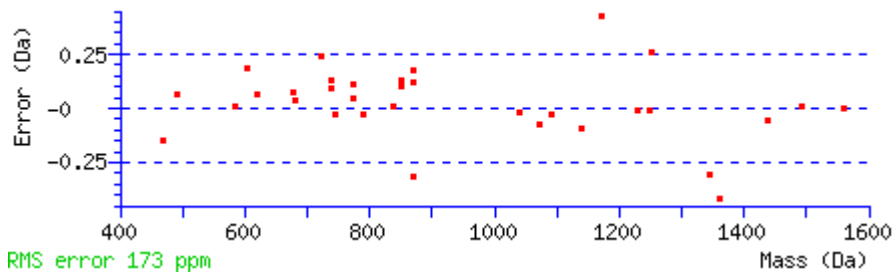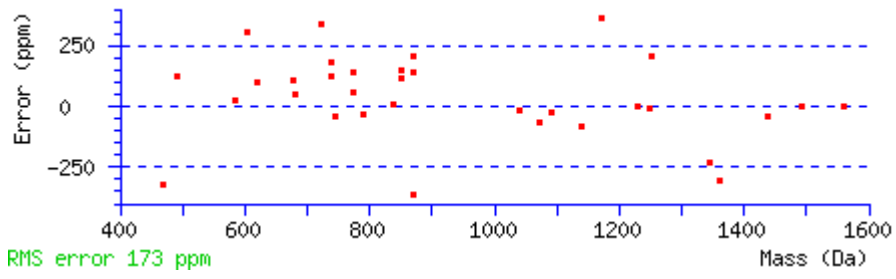

IDENTIFICATION 141

MS/MS Fragmentation of SRMGPSGG

Found in IPI00649088

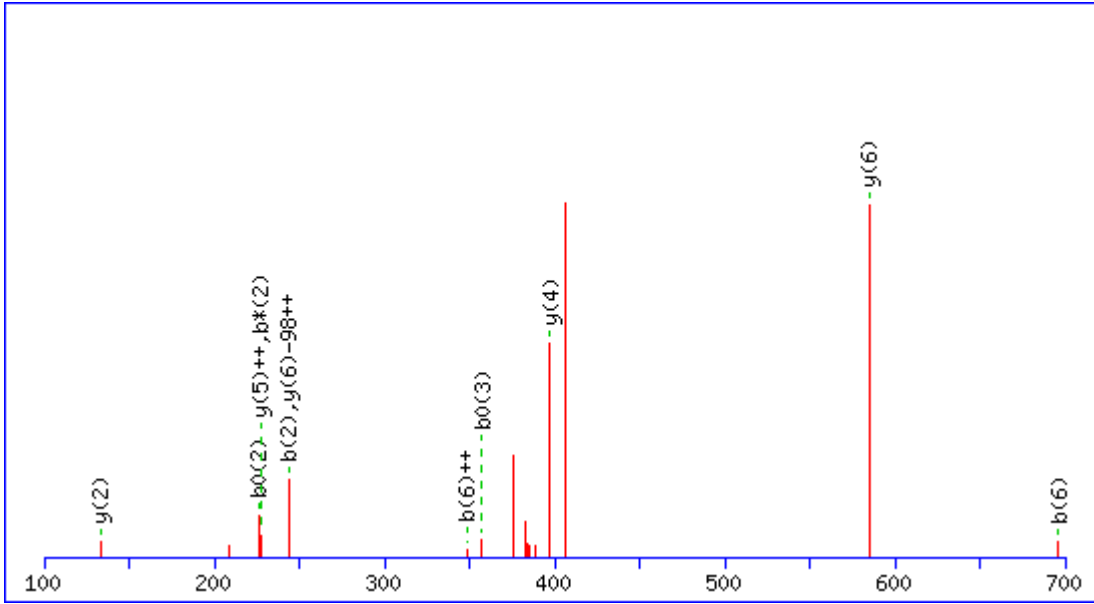

Monoisotopic mass of neutral peptide  $M_r(\text{calc})$ : 827.2997 Fixed modifications: Carbamidomethyl (C) (apply to specified residues or termini only) Variable modifications: S6 : Phospho (ST), with neutral losses 0.0000 (shown in table), 97.9769 Ions Score: 26 Expect: 0.083 (help)

| # | b        | b <sup>++</sup> | b <sup>*</sup> | b <sup>+++</sup> | b <sup>0</sup> | b <sup>0++</sup> | Seq. | y        | y <sup>++</sup> | y <sup>*</sup> | y <sup>+++</sup> | y <sup>0</sup> | y <sup>0++</sup> | # |
|---|----------|-----------------|----------------|------------------|----------------|------------------|------|----------|-----------------|----------------|------------------|----------------|------------------|---|
| 1 | 88.0393  | 44.5233         |                |                  | 70.0287        | 35.5180          | S    |          |                 |                |                  |                |                  | 8 |
| 2 | 244.1404 | 122.5738        | 227.1139       | 114.0606         | 226.1298       | 113.5686         | R    | 741.2750 | 371.1411        | 724.2484       | 362.6278         | 723.2644       | 362.1358         | 7 |
| 3 | 375.1809 | 188.0941        | 358.1544       | 179.5808         | 357.1703       | 179.0888         | M    | 585.1738 | 293.0906        |                |                  | 567.1633       | 284.0853         | 6 |
| 4 | 432.2024 | 216.6048        | 415.1758       | 208.0915         | 414.1918       | 207.5995         | G    | 454.1334 | 227.5703        |                |                  | 436.1228       | 218.5650         | 5 |
| 5 | 529.2551 | 265.1312        | 512.2286       | 256.6179         | 511.2446       | 256.1259         | P    | 397.1119 | 199.0596        |                |                  | 379.1013       | 190.0543         | 4 |
| 6 | 696.2535 | 348.6304        | 679.2269       | 340.1171         | 678.2429       | 339.6251         | S    | 300.0591 | 150.5332        |                |                  | 282.0486       | 141.5279         | 3 |
| 7 | 753.2750 | 377.1411        | 736.2484       | 368.6278         | 735.2644       | 368.1358         | G    | 133.0608 | 67.0340         |                |                  |                |                  | 2 |
| 8 |          |                 |                |                  |                |                  | G    | 76.0393  | 38.5233         |                |                  |                |                  | 1 |

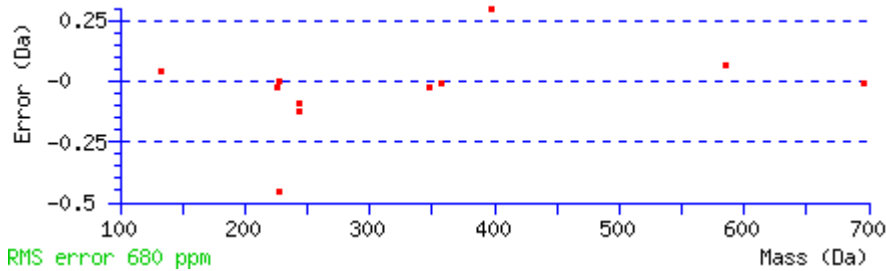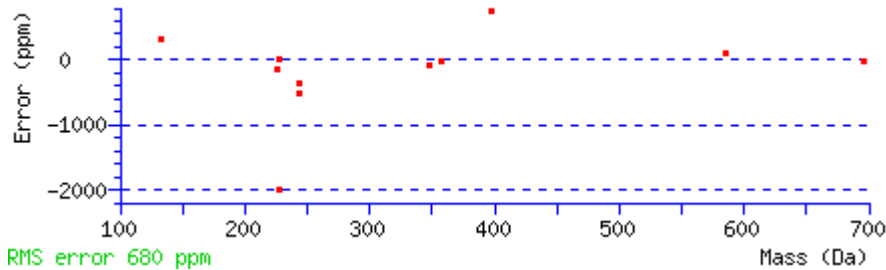

IDENTIFICATION 142

MS/MS Fragmentation of **IQKSFQNGSELHR**

Found in **IPI00855179**

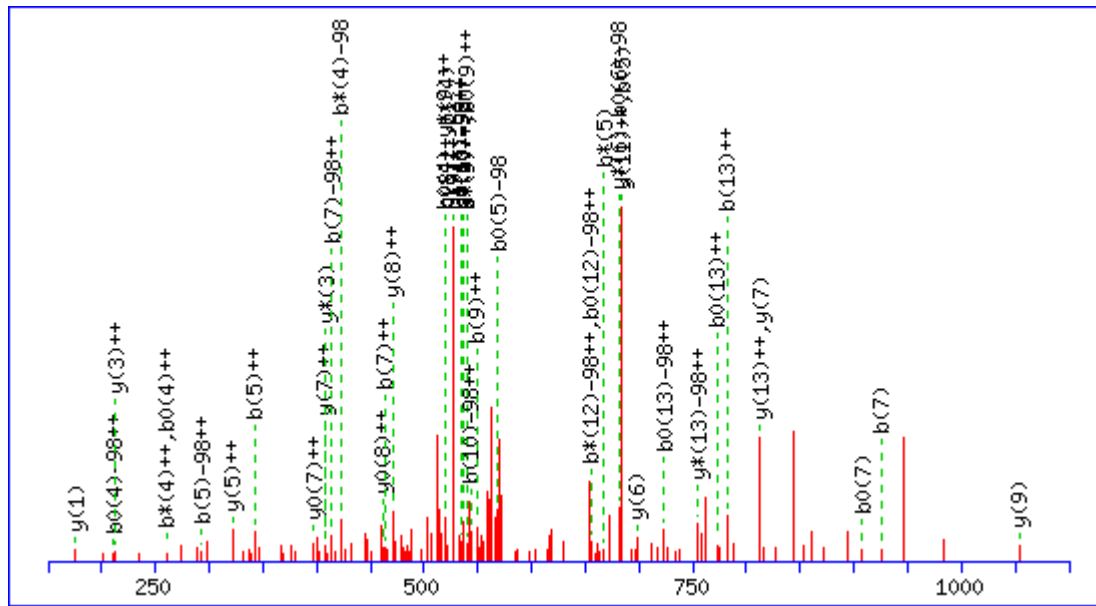

Monoisotopic mass of neutral peptide Mr(calc):

1735.8407

Fixed modifications:

Carbamidomethyl (C) (apply to specified residues or termini only)

Variable modifications:

S4 :

Phospho (ST), with neutral losses 0.0000(shown in table), 97.9769

Ions Score:

23

Expect:

0.59 (

help

)

| #  | b         | b <sup>++</sup> | b <sup>*</sup> | b <sup>+++</sup> | b <sup>0</sup> | b <sup>0++</sup> | Seq. | y         | y <sup>++</sup> | y <sup>*</sup> | y <sup>+++</sup> | y <sup>0</sup> | y <sup>0++</sup> | #  |
|----|-----------|-----------------|----------------|------------------|----------------|------------------|------|-----------|-----------------|----------------|------------------|----------------|------------------|----|
| 1  | 114.0913  | 57.5493         |                |                  |                |                  | I    |           |                 |                |                  |                |                  | 14 |
| 2  | 242.1499  | 121.5786        | 225.1234       | 113.0653         |                |                  | Q    | 1623.7639 | 812.3856        | 1606.7373      | 803.8723         | 1605.7533      | 803.3803         | 13 |
| 3  | 370.2449  | 185.6261        | 353.2183       | 177.1128         |                |                  | K    | 1495.7053 | 748.3563        | 1478.6788      | 739.8430         | 1477.6948      | 739.3510         | 12 |
| 4  | 537.2432  | 269.1253        | 520.2167       | 260.6120         | 519.2327       | 260.1200         | S    | 1367.6104 | 684.3088        | 1350.5838      | 675.7955         | 1349.5998      | 675.3035         | 11 |
| 5  | 684.3117  | 342.6595        | 667.2851       | 334.1462         | 666.3011       | 333.6542         | F    | 1200.6120 | 600.8096        | 1183.5854      | 592.2964         | 1182.6014      | 591.8044         | 10 |
| 6  | 797.3957  | 399.2015        | 780.3692       | 390.6882         | 779.3852       | 390.1962         | I    | 1053.5436 | 527.2754        | 1036.5170      | 518.7622         | 1035.5330      | 518.2701         | 9  |
| 7  | 925.4543  | 463.2308        | 908.4277       | 454.7175         | 907.4437       | 454.2255         | Q    | 940.4595  | 470.7334        | 923.4330       | 462.2201         | 922.4490       | 461.7281         | 8  |
| 8  | 1039.4972 | 520.2522        | 1022.4707      | 511.7390         | 1021.4867      | 511.2470         | N    | 812.4009  | 406.7041        | 795.3744       | 398.1908         | 794.3904       | 397.6988         | 7  |
| 9  | 1096.5187 | 548.7630        | 1079.4921      | 540.2497         | 1078.5081      | 539.7577         | G    | 698.3580  | 349.6826        | 681.3315       | 341.1694         | 680.3474       | 340.6774         | 6  |
| 10 | 1183.5507 | 592.2790        | 1166.5242      | 583.7657         | 1165.5402      | 583.2737         | S    | 641.3365  | 321.1719        | 624.3100       | 312.6586         | 623.3260       | 312.1666         | 5  |
| 11 | 1312.5933 | 656.8003        | 1295.5668      | 648.2870         | 1294.5827      | 647.7950         | E    | 554.3045  | 277.6559        | 537.2780       | 269.1426         | 536.2940       | 268.6506         | 4  |
| 12 | 1425.6774 | 713.3423        | 1408.6508      | 704.8290         | 1407.6668      | 704.3370         | L    | 425.2619  | 213.1346        | 408.2354       | 204.6213         |                |                  | 3  |
| 13 | 1562.7363 | 781.8718        | 1545.7097      | 773.3585         | 1544.7257      | 772.8665         | H    | 312.1779  | 156.5926        | 295.1513       | 148.0793         |                |                  | 2  |
| 14 |           |                 |                |                  |                |                  | R    | 175.1190  | 88.0631         | 158.0924       | 79.5498          |                |                  | 1  |

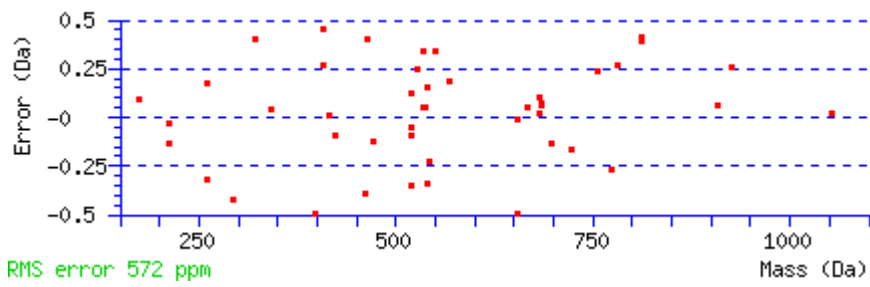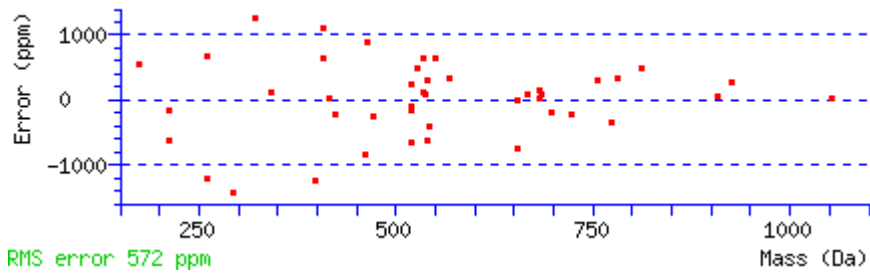

IDENTIFICATION 143

MS/MS Fragmentation of **QLQYLK**

Found in **IPI00129298**

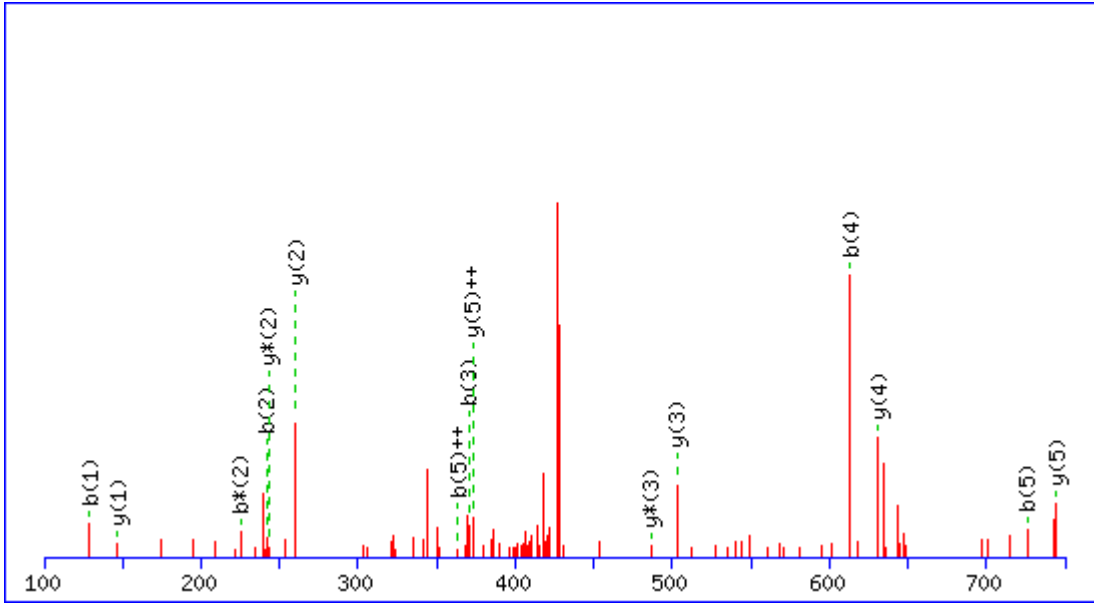

Monoisotopic mass of neutral peptide Mr(calc): 871.4204 Fixed modifications: Carbamidomethyl (C) (apply to specified residues or termini only) Variable modifications: Y4 : Phospho (Y) Ions Score: 33 Expect: 0.027 (help)

| # | b        | b <sup>++</sup> | b <sup>*</sup> | b <sup>+++</sup> | Seq. | y        | y <sup>++</sup> | y <sup>*</sup> | y <sup>+++</sup> | # |
|---|----------|-----------------|----------------|------------------|------|----------|-----------------|----------------|------------------|---|
| 1 | 129.0659 | 65.0366         | 112.0393       | 56.5233          | Q    |          |                 |                |                  | 6 |
| 2 | 242.1499 | 121.5786        | 225.1234       | 113.0653         | L    | 744.3692 | 372.6882        | 727.3426       | 364.1749         | 5 |
| 3 | 370.2085 | 185.6079        | 353.1819       | 177.0946         | Q    | 631.2851 | 316.1462        | 614.2586       | 307.6329         | 4 |
| 4 | 613.2382 | 307.1227        | 596.2116       | 298.6094         | Y    | 503.2265 | 252.1169        | 486.2000       | 243.6036         | 3 |
| 5 | 726.3222 | 363.6647        | 709.2957       | 355.1515         | L    | 260.1969 | 130.6021        | 243.1703       | 122.0888         | 2 |
| 6 |          |                 |                |                  | K    | 147.1128 | 74.0600         | 130.0863       | 65.5468          | 1 |

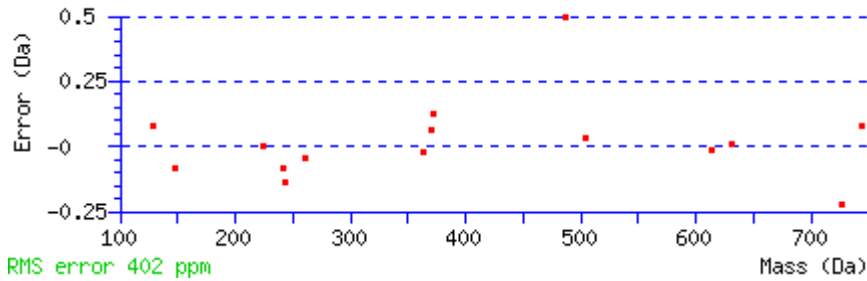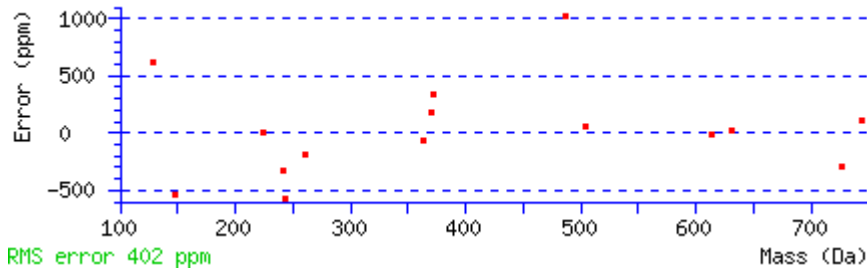



IDENTIFICATION 144

MS/MS Fragmentation of **FHDSEGGDTEETEDYR**

Found in

**IPI00169477**

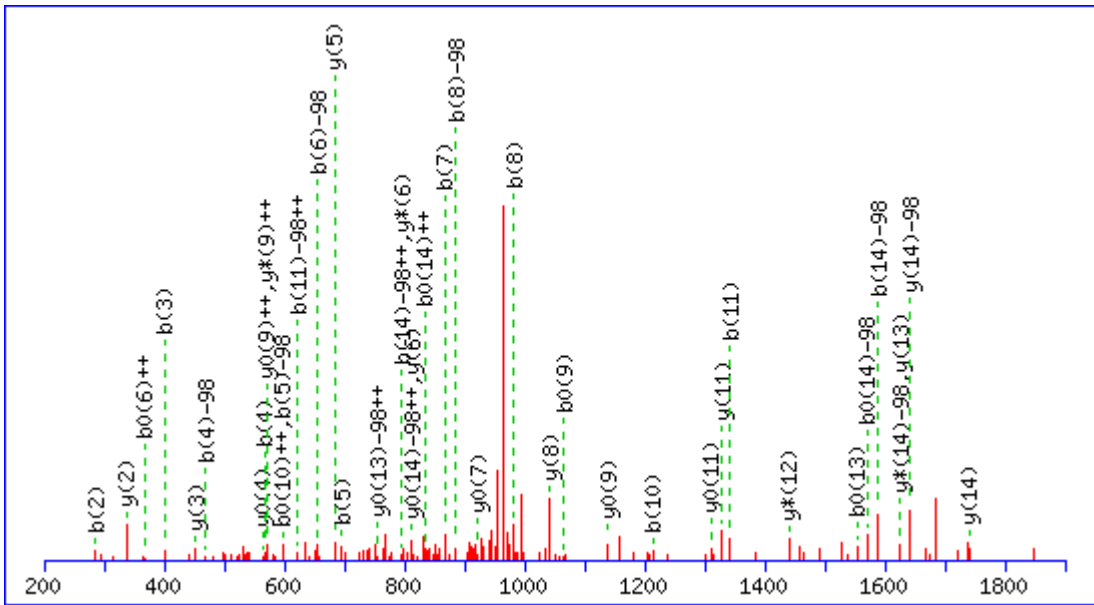

Monoisotopic mass of neutral peptide  $M_r(\text{calc})$ : 2023.6956

Fixed modifications: Carbamidomethyl (C) (apply to specified residues or termini only)

Variable modifications:

S4 : Phospho (ST), with neutral losses 0.0000(shown in table), 97.9769

Ions Score: 33 Expect: 0.035 (help)

| #  | b         | b <sup>++</sup> | b <sup>0</sup> | b <sup>0++</sup> | Seq. | y         | y <sup>++</sup> | y <sup>*</sup> | y <sup>+++</sup> | y <sup>0</sup> | y <sup>0++</sup> | #  |
|----|-----------|-----------------|----------------|------------------|------|-----------|-----------------|----------------|------------------|----------------|------------------|----|
| 1  | 148.0757  | 74.5415         |                |                  | F    |           |                 |                |                  |                |                  | 16 |
| 2  | 285.1346  | 143.0709        |                |                  | H    | 1877.6345 | 939.3209        | 1860.6080      | 930.8076         | 1859.6240      | 930.3156         | 15 |
| 3  | 400.1615  | 200.5844        | 382.1510       | 191.5791         | D    | 1740.5756 | 870.7914        | 1723.5491      | 862.2782         | 1722.5650      | 861.7862         | 14 |
| 4  | 567.1599  | 284.0836        | 549.1493       | 275.0783         | S    | 1625.5487 | 813.2780        | 1608.5221      | 804.7647         | 1607.5381      | 804.2727         | 13 |
| 5  | 696.2025  | 348.6049        | 678.1919       | 339.5996         | E    | 1458.5503 | 729.7788        | 1441.5238      | 721.2655         | 1440.5397      | 720.7735         | 12 |
| 6  | 753.2240  | 377.1156        | 735.2134       | 368.1103         | G    | 1329.5077 | 665.2575        | 1312.4812      | 656.7442         | 1311.4971      | 656.2522         | 11 |
| 7  | 868.2509  | 434.6291        | 850.2403       | 425.6238         | D    | 1272.4862 | 636.7468        | 1255.4597      | 628.2335         | 1254.4757      | 627.7415         | 10 |
| 8  | 983.2778  | 492.1426        | 965.2673       | 483.1373         | D    | 1157.4593 | 579.2333        | 1140.4328      | 570.7200         | 1139.4487      | 570.2280         | 9  |
| 9  | 1084.3255 | 542.6664        | 1066.3150      | 533.6611         | T    | 1042.4324 | 521.7198        | 1025.4058      | 513.2065         | 1024.4218      | 512.7145         | 8  |
| 10 | 1213.3681 | 607.1877        | 1195.3576      | 598.1824         | E    | 941.3847  | 471.1960        | 924.3581       | 462.6827         | 923.3741       | 462.1907         | 7  |
| 11 | 1342.4107 | 671.7090        | 1324.4001      | 662.7037         | E    | 812.3421  | 406.6747        | 795.3155       | 398.1614         | 794.3315       | 397.6694         | 6  |
| 12 | 1443.4584 | 722.2328        | 1425.4478      | 713.2276         | T    | 683.2995  | 342.1534        | 666.2729       | 333.6401         | 665.2889       | 333.1481         | 5  |
| 13 | 1572.5010 | 786.7541        | 1554.4904      | 777.7488         | E    | 582.2518  | 291.6295        | 565.2253       | 283.1163         | 564.2413       | 282.6243         | 4  |
| 14 | 1687.5279 | 844.2676        | 1669.5174      | 835.2623         | D    | 453.2092  | 227.1083        | 436.1827       | 218.5950         | 435.1987       | 218.1030         | 3  |
| 15 | 1850.5913 | 925.7993        | 1832.5807      | 916.7940         | Y    | 338.1823  | 169.5948        | 321.1557       | 161.0815         |                |                  | 2  |
| 16 |           |                 |                |                  | R    | 175.1190  | 88.0631         | 158.0924       | 79.5498          |                |                  | 1  |

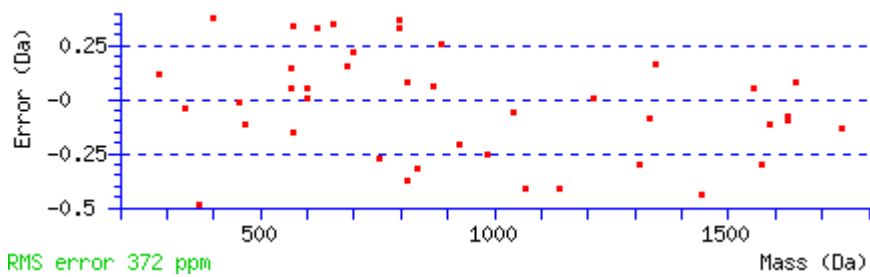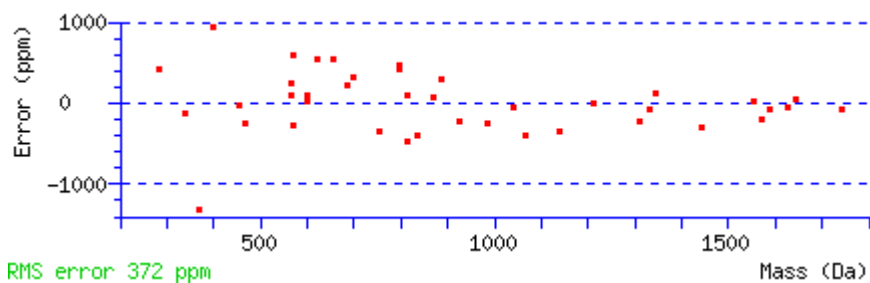

IDENTIFICATION 145

MS/MS Fragmentation of SETAPAAPAPVEK

Found in IPI00331597

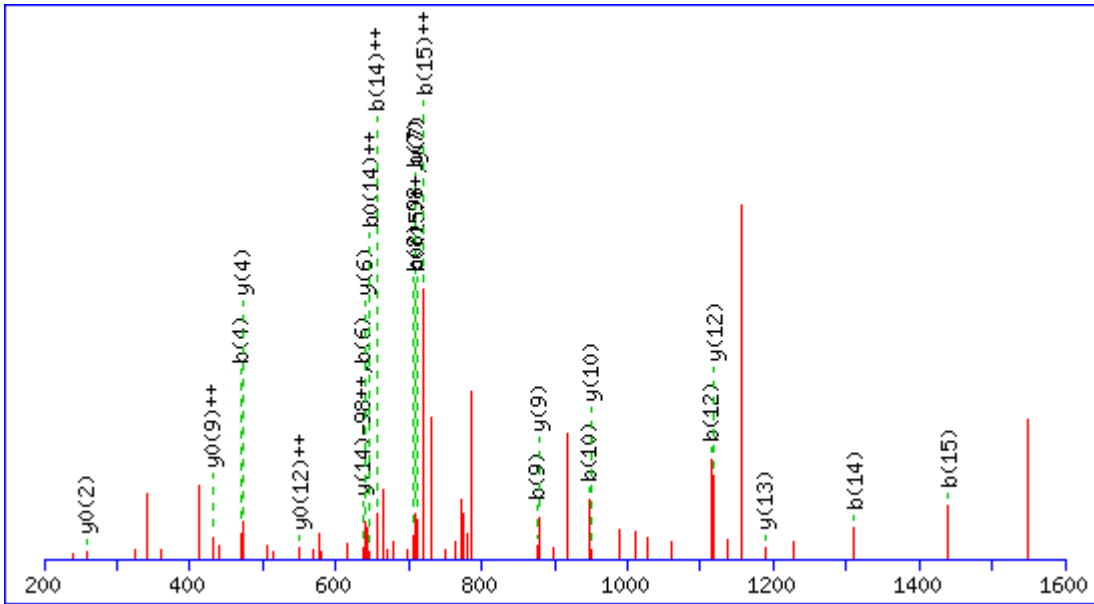

Monoisotopic mass of neutral peptide Mr(calc): 1585.7389

Fixed modifications: Carbamidomethyl (C) (apply to specified residues or termini only)

Variable modifications:

T3 : Phospho (ST), with neutral losses 0.0000(shown in table), 97.9769

Ions Score: 33 Expect: 0.072 (help)

| #  | b         | b <sup>++</sup> | b <sup>0</sup> | b <sup>0++</sup> | Seq. | y         | y <sup>++</sup> | y <sup>*</sup> | y <sup>+++</sup> | y <sup>0</sup> | y <sup>0++</sup> | #  |
|----|-----------|-----------------|----------------|------------------|------|-----------|-----------------|----------------|------------------|----------------|------------------|----|
| 1  | 88.0393   | 44.5233         | 70.0287        | 35.5180          | S    |           |                 |                |                  |                |                  | 16 |
| 2  | 217.0819  | 109.0446        | 199.0713       | 100.0393         | E    | 1499.7142 | 750.3607        | 1482.6876      | 741.8474         | 1481.7036      | 741.3554         | 15 |
| 3  | 398.0959  | 199.5516        | 380.0853       | 190.5463         | T    | 1370.6716 | 685.8394        | 1353.6450      | 677.3261         | 1352.6610      | 676.8341         | 14 |
| 4  | 469.1330  | 235.0701        | 451.1225       | 226.0649         | A    | 1189.6576 | 595.3324        | 1172.6310      | 586.8191         | 1171.6470      | 586.3271         | 13 |
| 5  | 566.1858  | 283.5965        | 548.1752       | 274.5912         | P    | 1118.6204 | 559.8139        | 1101.5939      | 551.3006         | 1100.6099      | 550.8086         | 12 |
| 6  | 637.2229  | 319.1151        | 619.2123       | 310.1098         | A    | 1021.5677 | 511.2875        | 1004.5411      | 502.7742         | 1003.5571      | 502.2822         | 11 |
| 7  | 708.2600  | 354.6336        | 690.2494       | 345.6284         | A    | 950.5306  | 475.7689        | 933.5040       | 467.2556         | 932.5200       | 466.7636         | 10 |
| 8  | 805.3128  | 403.1600        | 787.3022       | 394.1547         | P    | 879.4934  | 440.2504        | 862.4669       | 431.7371         | 861.4829       | 431.2451         | 9  |
| 9  | 876.3499  | 438.6786        | 858.3393       | 429.6733         | A    | 782.4407  | 391.7240        | 765.4141       | 383.2107         | 764.4301       | 382.7187         | 8  |
| 10 | 947.3870  | 474.1971        | 929.3764       | 465.1919         | A    | 711.4036  | 356.2054        | 694.3770       | 347.6921         | 693.3930       | 347.2001         | 7  |
| 11 | 1044.4398 | 522.7235        | 1026.4292      | 513.7182         | P    | 640.3665  | 320.6869        | 623.3399       | 312.1736         | 622.3559       | 311.6816         | 6  |
| 12 | 1115.4769 | 558.2421        | 1097.4663      | 549.2368         | A    | 543.3137  | 272.1605        | 526.2871       | 263.6472         | 525.3031       | 263.1552         | 5  |
| 13 | 1212.5296 | 606.7685        | 1194.5191      | 597.7632         | P    | 472.2766  | 236.6419        | 455.2500       | 228.1287         | 454.2660       | 227.6366         | 4  |
| 14 | 1311.5981 | 656.3027        | 1293.5875      | 647.2974         | V    | 375.2238  | 188.1155        | 358.1973       | 179.6023         | 357.2132       | 179.1103         | 3  |
| 15 | 1440.6407 | 720.8240        | 1422.6301      | 711.8187         | E    | 276.1554  | 138.5813        | 259.1288       | 130.0681         | 258.1448       | 129.5761         | 2  |
| 16 |           |                 |                |                  | K    | 147.1128  | 74.0600         | 130.0863       | 65.5468          |                |                  | 1  |

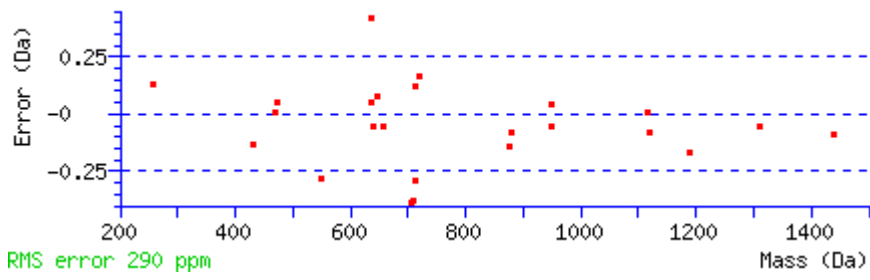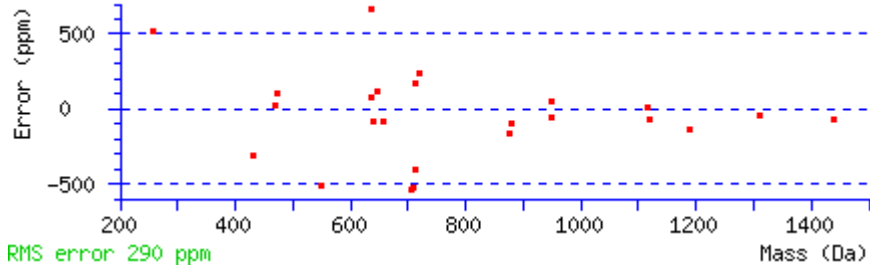

IDENTIFICATION 146

MS/MS Fragmentation of EDALDDSVSSSSVHASPLASSPVRK

Found in IPI00337844

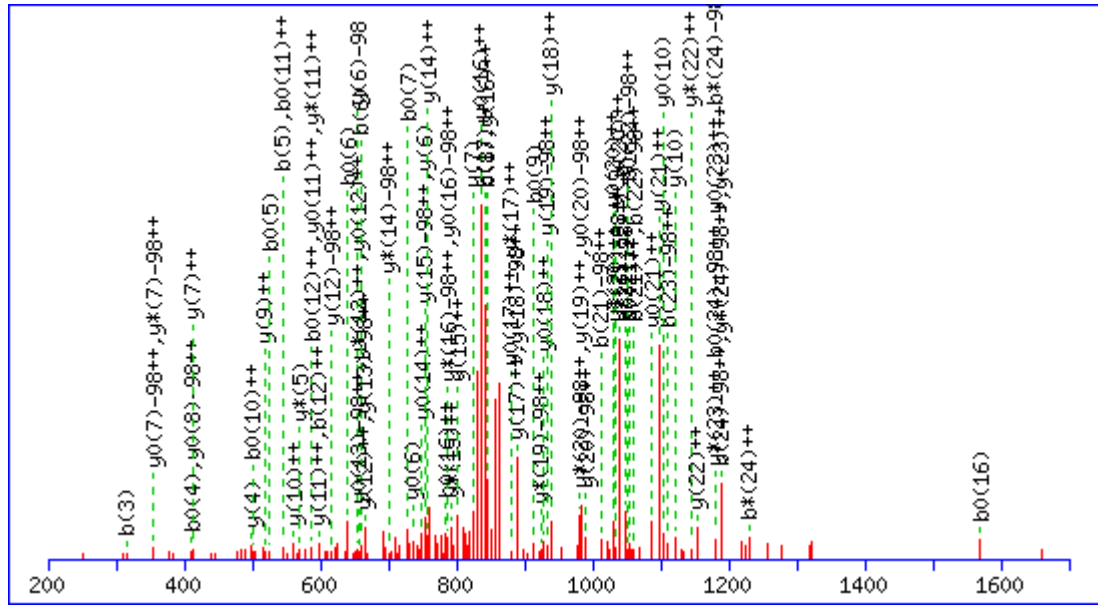

Monoisotopic mass of neutral peptide Mr(calc):

2620.2018

Fixed modifications:

Carbamidomethyl (C) (apply to specified residues or termini only)

Variable modifications:

S20 :

Phospho (ST), with neutral losses 0.0000(shown in table), 97.9769

Ions Score:

59

Expect:

0.00024 (

help

)

| #  | b         | b <sup>++</sup> | b <sup>*</sup> | b <sup>+++</sup> | b <sup>0</sup> | b <sup>0++</sup> | Seq. | y         | y <sup>++</sup> | y <sup>*</sup> | y <sup>+++</sup> | y <sup>0</sup> | y <sup>0++</sup> | #  |
|----|-----------|-----------------|----------------|------------------|----------------|------------------|------|-----------|-----------------|----------------|------------------|----------------|------------------|----|
| 1  | 130.0499  | 65.5286         |                |                  | 112.0393       | 56.5233          | E    |           |                 |                |                  |                |                  | 25 |
| 2  | 245.0768  | 123.0420        |                |                  | 227.0662       | 114.0368         | D    | 2492.1665 | 1246.5869       | 2475.1399      | 1238.0736        | 2474.1559      | 1237.5816        | 24 |
| 3  | 316.1139  | 158.5606        |                |                  | 298.1034       | 149.5553         | A    | 2377.1395 | 1189.0734       | 2360.1130      | 1180.5601        | 2359.1289      | 1180.0681        | 23 |
| 4  | 429.1980  | 215.1026        |                |                  | 411.1874       | 206.0974         | L    | 2306.1024 | 1153.5548       | 2289.0758      | 1145.0416        | 2288.0918      | 1144.5496        | 22 |
| 5  | 544.2249  | 272.6161        |                |                  | 526.2144       | 263.6108         | D    | 2193.0183 | 1097.0128       | 2175.9918      | 1088.4995        | 2175.0078      | 1088.0075        | 21 |
| 6  | 659.2519  | 330.1296        |                |                  | 641.2413       | 321.1243         | D    | 2077.9914 | 1039.4993       | 2060.9648      | 1030.9861        | 2059.9808      | 1030.4940        | 20 |
| 7  | 746.2839  | 373.6456        |                |                  | 728.2733       | 364.6403         | S    | 1962.9644 | 981.9859        | 1945.9379      | 973.4726         | 1944.9539      | 972.9806         | 19 |
| 8  | 845.3523  | 423.1798        |                |                  | 827.3418       | 414.1745         | V    | 1875.9324 | 938.4698        | 1858.9059      | 929.9566         | 1857.9219      | 929.4646         | 18 |
| 9  | 932.3843  | 466.6958        |                |                  | 914.3738       | 457.6905         | S    | 1776.8640 | 888.9356        | 1759.8375      | 880.4224         | 1758.8534      | 879.9304         | 17 |
| 10 | 1019.4164 | 510.2118        |                |                  | 1001.4058      | 501.2065         | S    | 1689.8320 | 845.4196        | 1672.8054      | 836.9064         | 1671.8214      | 836.4143         | 16 |
| 11 | 1106.4484 | 553.7278        |                |                  | 1088.4378      | 544.7226         | S    | 1602.7999 | 801.9036        | 1585.7734      | 793.3903         | 1584.7894      | 792.8983         | 15 |
| 12 | 1193.4804 | 597.2439        |                |                  | 1175.4699      | 588.2386         | S    | 1515.7679 | 758.3876        | 1498.7414      | 749.8743         | 1497.7574      | 749.3823         | 14 |
| 13 | 1292.5488 | 646.7781        |                |                  | 1274.5383      | 637.7728         | V    | 1428.7359 | 714.8716        | 1411.7093      | 706.3583         | 1410.7253      | 705.8663         | 13 |
| 14 | 1429.6078 | 715.3075        |                |                  | 1411.5972      | 706.3022         | H    | 1329.6675 | 665.3374        | 1312.6409      | 656.8241         | 1311.6569      | 656.3321         | 12 |

|    |           |           |           |           |           |           |   |           |          |           |          |           |          |    |
|----|-----------|-----------|-----------|-----------|-----------|-----------|---|-----------|----------|-----------|----------|-----------|----------|----|
| 15 | 1500.6449 | 750.8261  |           |           | 1482.6343 | 741.8208  | A | 1192.6086 | 596.8079 | 1175.5820 | 588.2946 | 1174.5980 | 587.8026 | 11 |
| 16 | 1587.6769 | 794.3421  |           |           | 1569.6663 | 785.3368  | S | 1121.5714 | 561.2894 | 1104.5449 | 552.7761 | 1103.5609 | 552.2841 | 10 |
| 17 | 1684.7297 | 842.8685  |           |           | 1666.7191 | 833.8632  | P | 1034.5394 | 517.7733 | 1017.5129 | 509.2601 | 1016.5289 | 508.7681 | 9  |
| 18 | 1797.8137 | 899.4105  |           |           | 1779.8032 | 890.4052  | L | 937.4867  | 469.2470 | 920.4601  | 460.7337 | 919.4761  | 460.2417 | 8  |
| 19 | 1868.8508 | 934.9291  |           |           | 1850.8403 | 925.9238  | A | 824.4026  | 412.7049 | 807.3760  | 404.1917 | 806.3920  | 403.6997 | 7  |
| 20 | 2035.8492 | 1018.4282 |           |           | 2017.8386 | 1009.4230 | S | 753.3655  | 377.1864 | 736.3389  | 368.6731 | 735.3549  | 368.1811 | 6  |
| 21 | 2122.8812 | 1061.9443 |           |           | 2104.8707 | 1052.9390 | S | 586.3671  | 293.6872 | 569.3406  | 285.1739 | 568.3566  | 284.6819 | 5  |
| 22 | 2219.9340 | 1110.4706 |           |           | 2201.9234 | 1101.4654 | P | 499.3351  | 250.1712 | 482.3085  | 241.6579 |           |          | 4  |
| 23 | 2319.0024 | 1160.0048 |           |           | 2300.9918 | 1150.9996 | V | 402.2823  | 201.6448 | 385.2558  | 193.1315 |           |          | 3  |
| 24 | 2475.1035 | 1238.0554 | 2458.0770 | 1229.5421 | 2457.0930 | 1229.0501 | R | 303.2139  | 152.1106 | 286.1874  | 143.5973 |           |          | 2  |
| 25 |           |           |           |           |           |           | K | 147.1128  | 74.0600  | 130.0863  | 65.5468  |           |          | 1  |

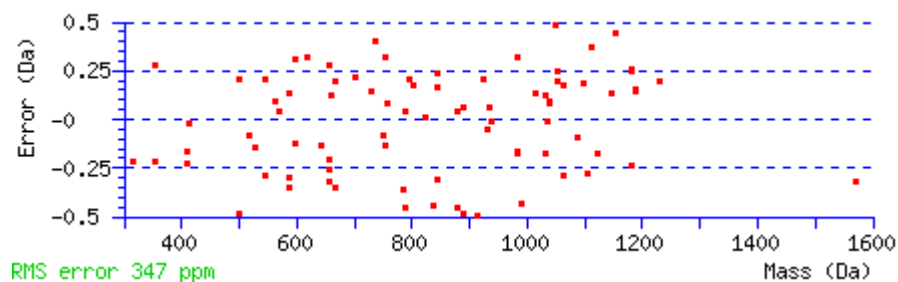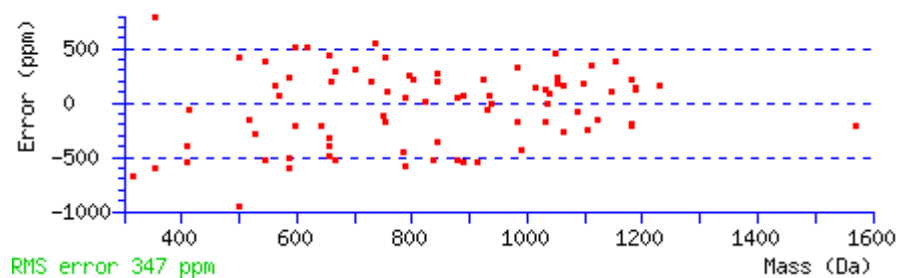



|    |           |           |           |           |           |           |   |          |          |          |          |  |  |   |
|----|-----------|-----------|-----------|-----------|-----------|-----------|---|----------|----------|----------|----------|--|--|---|
| 31 | 3397.6484 | 1699.3279 | 3380.6219 | 1690.8146 | 3379.6379 | 1690.3226 | N | 852.3999 | 426.7036 | 835.3733 | 418.1903 |  |  | 6 |
| 32 | 3560.7118 | 1780.8595 | 3543.6852 | 1772.3463 | 3542.7012 | 1771.8542 | Y | 738.3570 | 369.6821 | 721.3304 | 361.1688 |  |  | 5 |
| 33 | 3688.7704 | 1844.8888 | 3671.7438 | 1836.3755 | 3670.7598 | 1835.8835 | Q | 575.2936 | 288.1504 | 558.2671 | 279.6372 |  |  | 4 |
| 34 | 3825.8293 | 1913.4183 | 3808.8027 | 1904.9050 | 3807.8187 | 1904.4130 | H | 447.2350 | 224.1212 | 430.2085 | 215.6079 |  |  | 3 |
| 35 | 3988.8926 | 1994.9499 | 3971.8660 | 1986.4367 | 3970.8820 | 1985.9447 | Y | 310.1761 | 155.5917 | 293.1496 | 147.0784 |  |  | 2 |
| 36 |           |           |           |           |           |           | K | 147.1128 | 74.0600  | 130.0863 | 65.5468  |  |  | 1 |

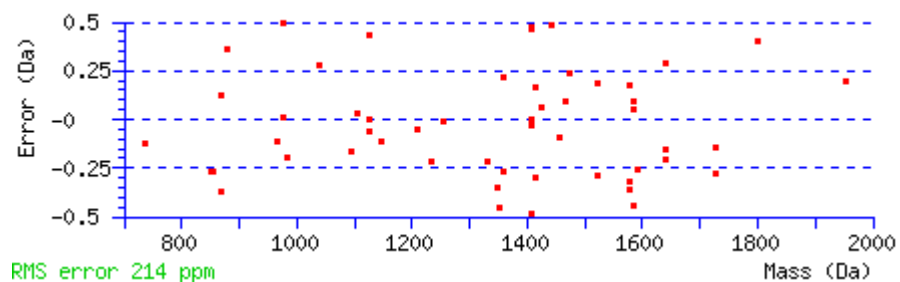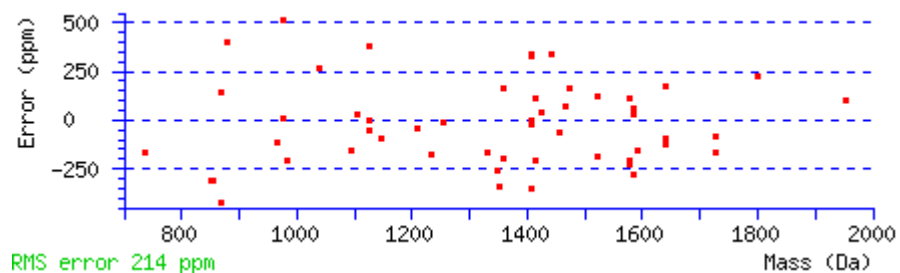



IDENTIFICATION 148

MS/MS Fragmentation of **SSGSPYGGGYGSGGGSGGYGSR**

Found in **IPI00269661**

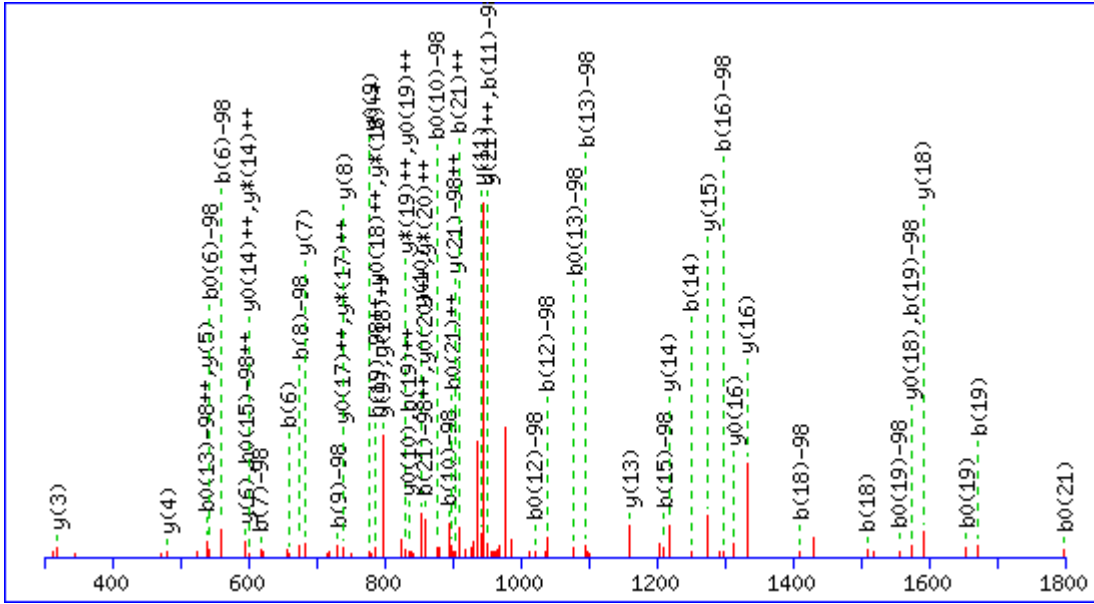

Monoisotopic mass of neutral peptide Mr(calc): 1989.7491 Fixed modifications: Carbamidomethyl (C) (apply to specified residues or termini only) Variable modifications: S2 : Phospho (ST), with neutral losses 97.9769 (shown in table), 0.0000 Ions Score: 111 Expect: 1e-09 (help)

| #  | b         | b <sup>++</sup> | b <sup>0</sup> | b <sup>0++</sup> | Seq. | y         | y <sup>++</sup> | y <sup>*</sup> | y <sup>+++</sup> | y <sup>0</sup> | y <sup>0++</sup> | #  |
|----|-----------|-----------------|----------------|------------------|------|-----------|-----------------|----------------|------------------|----------------|------------------|----|
| 1  | 88.0393   | 44.5233         | 70.0287        | 35.5180          | S    |           |                 |                |                  |                |                  | 22 |
| 2  | 157.0608  | 79.0340         | 139.0502       | 70.0287          | S    | 1805.7474 | 903.3773        | 1788.7208      | 894.8641         | 1787.7368      | 894.3720         | 21 |
| 3  | 214.0822  | 107.5448        | 196.0717       | 98.5395          | G    | 1736.7259 | 868.8666        | 1719.6994      | 860.3533         | 1718.7154      | 859.8613         | 20 |
| 4  | 301.1143  | 151.0608        | 283.1037       | 142.0555         | S    | 1679.7045 | 840.3559        | 1662.6779      | 831.8426         | 1661.6939      | 831.3506         | 19 |
| 5  | 398.1670  | 199.5871        | 380.1565       | 190.5819         | P    | 1592.6724 | 796.8399        | 1575.6459      | 788.3266         | 1574.6619      | 787.8346         | 18 |
| 6  | 561.2304  | 281.1188        | 543.2198       | 272.1135         | Y    | 1495.6197 | 748.3135        | 1478.5931      | 739.8002         | 1477.6091      | 739.3082         | 17 |
| 7  | 618.2518  | 309.6295        | 600.2413       | 300.6243         | G    | 1332.5563 | 666.7818        | 1315.5298      | 658.2685         | 1314.5458      | 657.7765         | 16 |
| 8  | 675.2733  | 338.1403        | 657.2627       | 329.1350         | G    | 1275.5349 | 638.2711        | 1258.5083      | 629.7578         | 1257.5243      | 629.2658         | 15 |
| 9  | 732.2947  | 366.6510        | 714.2842       | 357.6457         | G    | 1218.5134 | 609.7603        | 1201.4869      | 601.2471         | 1200.5028      | 600.7551         | 14 |
| 10 | 895.3581  | 448.1827        | 877.3475       | 439.1774         | Y    | 1161.4919 | 581.2496        | 1144.4654      | 572.7363         | 1143.4814      | 572.2443         | 13 |
| 11 | 952.3795  | 476.6934        | 934.3690       | 467.6881         | G    | 998.4286  | 499.7179        | 981.4021       | 491.2047         | 980.4180       | 490.7127         | 12 |
| 12 | 1039.4116 | 520.2094        | 1021.4010      | 511.2041         | S    | 941.4071  | 471.2072        | 924.3806       | 462.6939         | 923.3966       | 462.2019         | 11 |
| 13 | 1096.4330 | 548.7202        | 1078.4225      | 539.7149         | G    | 854.3751  | 427.6912        | 837.3486       | 419.1779         | 836.3646       | 418.6859         | 10 |
| 14 | 1153.4545 | 577.2309        | 1135.4439      | 568.2256         | G    | 797.3537  | 399.1805        | 780.3271       | 390.6672         | 779.3431       | 390.1752         | 9  |
| 15 | 1210.4760 | 605.7416        | 1192.4654      | 596.7363         | G    | 740.3322  | 370.6697        | 723.3056       | 362.1565         | 722.3216       | 361.6645         | 8  |
| 16 | 1297.5080 | 649.2576        | 1279.4974      | 640.2523         | S    | 683.3107  | 342.1590        | 666.2842       | 333.6457         | 665.3002       | 333.1537         | 7  |
| 17 | 1354.5294 | 677.7684        | 1336.5189      | 668.7631         | G    | 596.2787  | 298.6430        | 579.2522       | 290.1297         | 578.2681       | 289.6377         | 6  |
| 18 | 1411.5509 | 706.2791        | 1393.5403      | 697.2738         | G    | 539.2572  | 270.1323        | 522.2307       | 261.6190         | 521.2467       | 261.1270         | 5  |
| 19 | 1574.6142 | 787.8108        | 1556.6037      | 778.8055         | Y    | 482.2358  | 241.6215        | 465.2092       | 233.1082         | 464.2252       | 232.6162         | 4  |
| 20 | 1631.6357 | 816.3215        | 1613.6251      | 807.3162         | G    | 319.1724  | 160.0899        | 302.1459       | 151.5766         | 301.1619       | 151.0846         | 3  |
| 21 | 1718.6677 | 859.8375        | 1700.6572      | 850.8322         | S    | 262.1510  | 131.5791        | 245.1244       | 123.0659         | 244.1404       | 122.5738         | 2  |
| 22 |           |                 |                |                  | R    | 175.1190  | 88.0631         | 158.0924       | 79.5498          |                |                  | 1  |

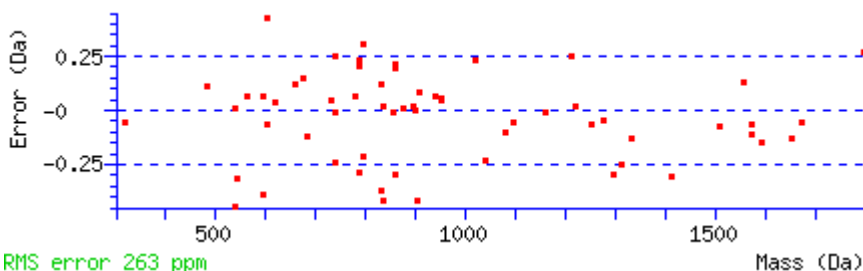

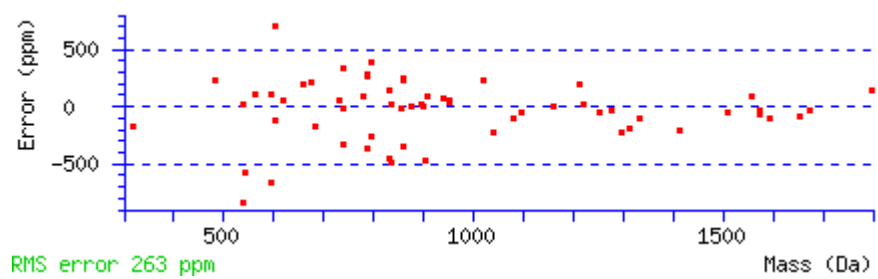

IDENTIFICATION 149

MS/MS Fragmentation of **SSQQQTQPQKQR**

Found in

**IPI00135207**

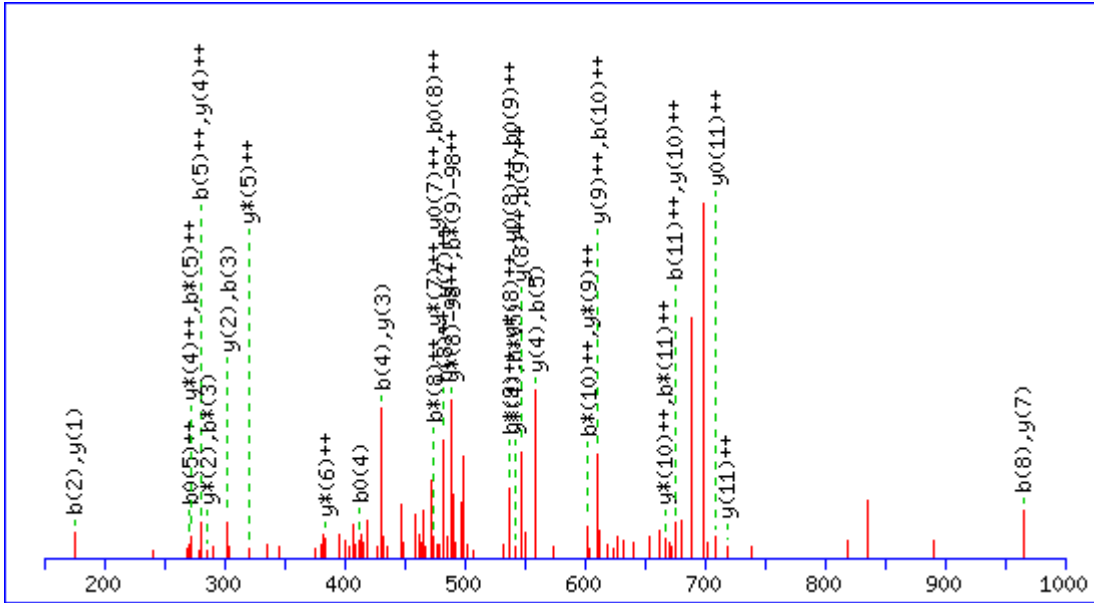

Monoisotopic mass of neutral peptide  $M_r(\text{calc})$ : 1522.6889 Fixed modifications: Carbamidomethyl (C) (apply to specified residues or termini only) Variable modifications: T6 : Phospho (ST), with neutral losses 0.0000 (shown in table), 97.9769 Ions Score: 37 Expect: 0.029 (help)

| #  | b         | b <sup>++</sup> | b <sup>*</sup> | b <sup>+++</sup> | b <sup>0</sup> | b <sup>0++</sup> | Seq. | y         | y <sup>++</sup> | y <sup>*</sup> | y <sup>+++</sup> | y <sup>0</sup> | y <sup>0++</sup> | #  |
|----|-----------|-----------------|----------------|------------------|----------------|------------------|------|-----------|-----------------|----------------|------------------|----------------|------------------|----|
| 1  | 88.0393   | 44.5233         |                |                  | 70.0287        | 35.5180          | S    |           |                 |                |                  |                |                  | 12 |
| 2  | 175.0713  | 88.0393         |                |                  | 157.0608       | 79.0340          | S    | 1436.6642 | 718.8357        | 1419.6376      | 710.3225         | 1418.6536      | 709.8304         | 11 |
| 3  | 303.1299  | 152.0686        | 286.1034       | 143.5553         | 285.1193       | 143.0633         | Q    | 1349.6322 | 675.3197        | 1332.6056      | 666.8064         | 1331.6216      | 666.3144         | 10 |
| 4  | 431.1885  | 216.0979        | 414.1619       | 207.5846         | 413.1779       | 207.0926         | Q    | 1221.5736 | 611.2904        | 1204.5470      | 602.7772         | 1203.5630      | 602.2851         | 9  |
| 5  | 559.2471  | 280.1272        | 542.2205       | 271.6139         | 541.2365       | 271.1219         | Q    | 1093.5150 | 547.2611        | 1076.4885      | 538.7479         | 1075.5044      | 538.2559         | 8  |
| 6  | 740.2611  | 370.6342        | 723.2345       | 362.1209         | 722.2505       | 361.6289         | T    | 965.4564  | 483.2318        | 948.4299       | 474.7186         | 947.4459       | 474.2266         | 7  |
| 7  | 868.3197  | 434.6635        | 851.2931       | 426.1502         | 850.3091       | 425.6582         | Q    | 784.4424  | 392.7248        | 767.4159       | 384.2116         |                |                  | 6  |
| 8  | 965.3724  | 483.1898        | 948.3459       | 474.6766         | 947.3619       | 474.1846         | P    | 656.3838  | 328.6956        | 639.3573       | 320.1823         |                |                  | 5  |
| 9  | 1093.4310 | 547.2191        | 1076.4044      | 538.7059         | 1075.4204      | 538.2139         | Q    | 559.3311  | 280.1692        | 542.3045       | 271.6559         |                |                  | 4  |
| 10 | 1221.5260 | 611.2666        | 1204.4994      | 602.7533         | 1203.5154      | 602.2613         | K    | 431.2725  | 216.1399        | 414.2459       | 207.6266         |                |                  | 3  |
| 11 | 1349.5845 | 675.2959        | 1332.5580      | 666.7826         | 1331.5740      | 666.2906         | Q    | 303.1775  | 152.0924        | 286.1510       | 143.5791         |                |                  | 2  |
| 12 |           |                 |                |                  |                |                  | R    | 175.1190  | 88.0631         | 158.0924       | 79.5498          |                |                  | 1  |

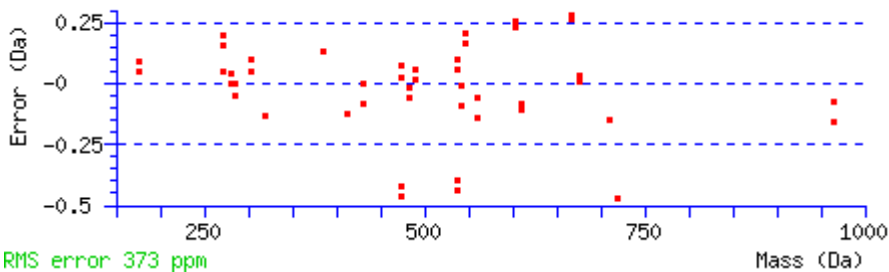

RMS error 373 ppm

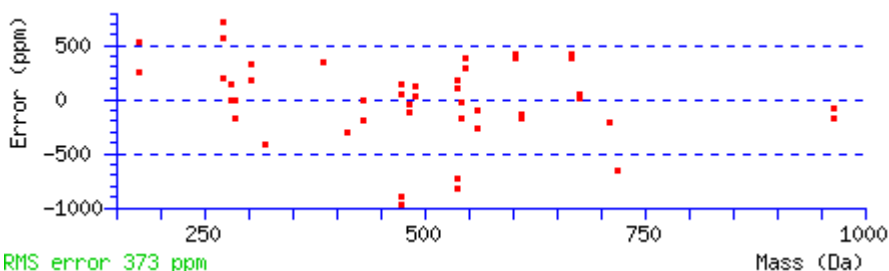

RMS error 373 ppm

IDENTIFICATION 150

MS/MS Fragmentation of  
**KPLTSWILFAER**

Found in  
**IPI00756871**

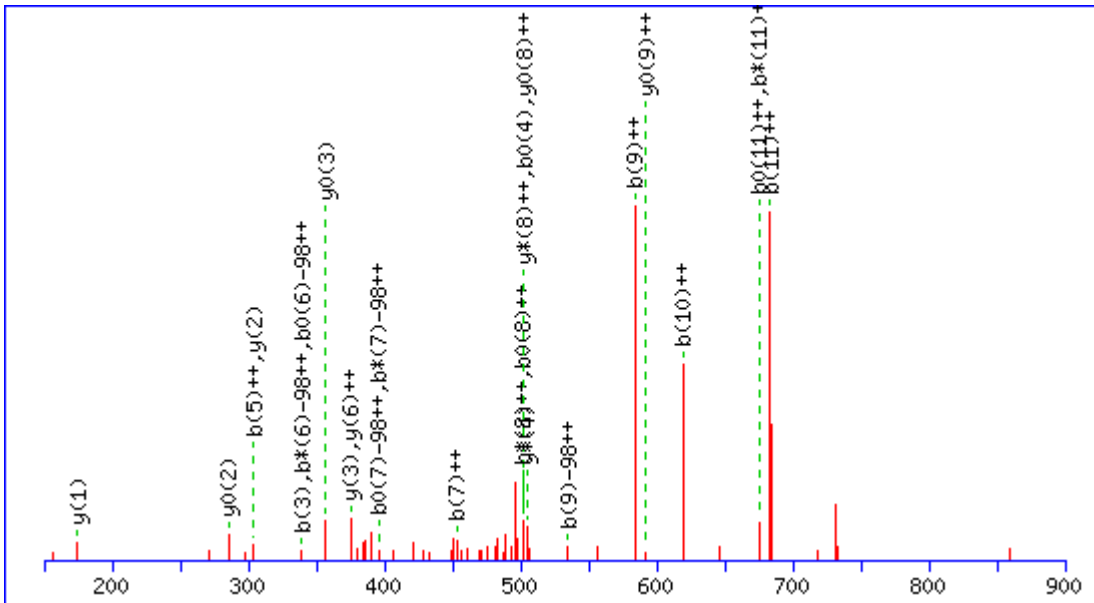

Monoisotopic mass of neutral peptide Mr(calc): 1539.7850 Fixed modifications: Carbamidomethyl (C) (apply to specified residues or termini only) Variable modifications: T4 : Phospho (ST), with neutral losses 0.0000(shown in table), 97.9769 Ions Score: 24 Expect: 0.33 (help)

| #  | b               | b <sup>++</sup> | b <sup>*</sup> | b <sup>+++</sup> | b <sup>0</sup>  | b <sup>0++</sup> | Seq. | y               | y <sup>++</sup> | y <sup>*</sup>  | y <sup>++</sup> * | y <sup>0</sup>  | y <sup>0++</sup> | #  |
|----|-----------------|-----------------|----------------|------------------|-----------------|------------------|------|-----------------|-----------------|-----------------|-------------------|-----------------|------------------|----|
| 1  | 129.1022        | 65.0548         | 112.0757       | 56.5415          |                 |                  | K    |                 |                 |                 |                   |                 |                  | 12 |
| 2  | 226.1550        | 113.5811        | 209.1285       | 105.0679         |                 |                  | P    | 1412.6974       | 706.8523        | 1395.6708       | 698.3391          | 1394.6868       | 697.8470         | 11 |
| 3  | <b>339.2391</b> | 170.1232        | 322.2125       | 161.6099         |                 |                  | L    | 1315.6446       | 658.3259        | 1298.6181       | 649.8127          | 1297.6341       | 649.3207         | 10 |
| 4  | 520.2531        | 260.6302        | 503.2265       | 252.1169         | <b>502.2425</b> | 251.6249         | T    | 1202.5606       | 601.7839        | 1185.5340       | 593.2706          | 1184.5500       | <b>592.7786</b>  | 9  |
| 5  | 607.2851        | <b>304.1462</b> | 590.2586       | 295.6329         | 589.2745        | 295.1409         | S    | 1021.5465       | 511.2769        | 1004.5200       | <b>502.7636</b>   | 1003.5360       | <b>502.2716</b>  | 8  |
| 6  | 793.3644        | 397.1858        | 776.3379       | 388.6726         | 775.3539        | 388.1806         | W    | 934.5145        | 467.7609        | 917.4880        | 459.2476          | 916.5039        | 458.7556         | 7  |
| 7  | 906.4485        | <b>453.7279</b> | 889.4219       | 445.2146         | 888.4379        | 444.7226         | I    | 748.4352        | <b>374.7212</b> | 731.4087        | 366.2080          | 730.4246        | 365.7160         | 6  |
| 8  | 1019.5325       | 510.2699        | 1002.5060      | <b>501.7566</b>  | 1001.5220       | <b>501.2646</b>  | L    | 635.3511        | 318.1792        | 618.3246        | 309.6659          | 617.3406        | 309.1739         | 5  |
| 9  | 1166.6010       | <b>583.8041</b> | 1149.5744      | 575.2908         | 1148.5904       | 574.7988         | F    | 522.2671        | 261.6372        | <b>505.2405</b> | 253.1239          | 504.2565        | 252.6319         | 4  |
| 10 | 1237.6381       | <b>619.3227</b> | 1220.6115      | 610.8094         | 1219.6275       | 610.3174         | A    | <b>375.1987</b> | 188.1030        | 358.1721        | 179.5897          | <b>357.1881</b> | 179.0977         | 3  |
| 11 | 1366.6807       | <b>683.8440</b> | 1349.6541      | <b>675.3307</b>  | 1348.6701       | <b>674.8387</b>  | E    | <b>304.1615</b> | 152.5844        | 287.1350        | 144.0711          | <b>286.1510</b> | 143.5791         | 2  |
| 12 |                 |                 |                |                  |                 |                  | R    | <b>175.1190</b> | 88.0631         | 158.0924        | 79.5498           |                 |                  | 1  |

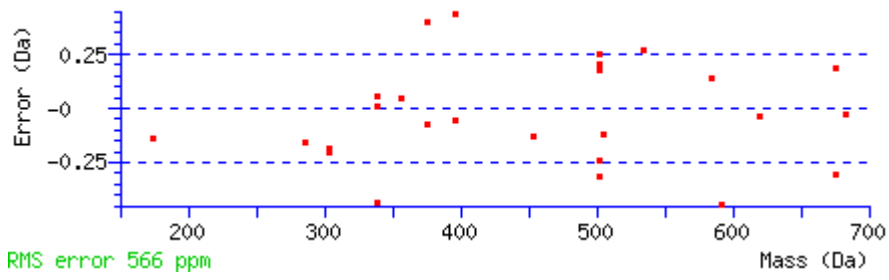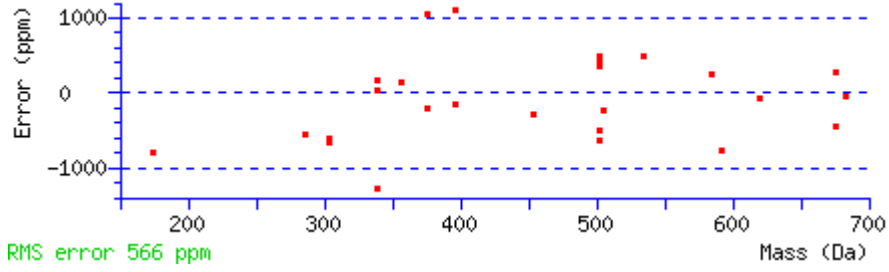

IDENTIFICATION 151

MS/MS Fragmentation of **DDSHSAEDSEDEKDDHK**

Found in **IPI00341869**

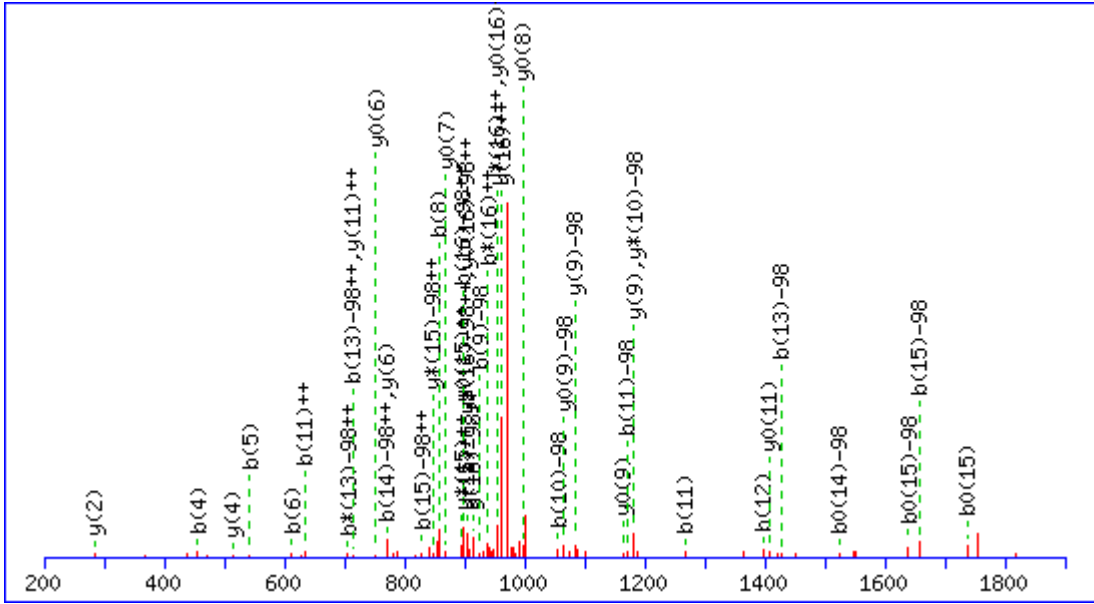

Monoisotopic mass of neutral peptide Mr(calc): 2037.7073

Fixed modifications: Carbamidomethyl (C) (apply to specified residues or termini only)

Variable modifications:

S9 : Phospho (ST), with neutral losses 97.9769 (shown in table), 0.0000

Ions Score: 35 Expect: 0.026 (help)

| #  | b         | b <sup>++</sup> | b <sup>*</sup> | b <sup>+++</sup> | b <sup>0</sup> | b <sup>0++</sup> | Seq. | y         | y <sup>++</sup> | y <sup>*</sup> | y <sup>+++</sup> | y <sup>0</sup> | y <sup>0++</sup> | #  |
|----|-----------|-----------------|----------------|------------------|----------------|------------------|------|-----------|-----------------|----------------|------------------|----------------|------------------|----|
| 1  | 116.0342  | 58.5207         |                |                  | 98.0237        | 49.5155          | D    |           |                 |                |                  |                |                  | 17 |
| 2  | 231.0612  | 116.0342        |                |                  | 213.0506       | 107.0289         | D    | 1825.7107 | 913.3590        | 1808.6842      | 904.8457         | 1807.7002      | 904.3537         | 16 |
| 3  | 318.0932  | 159.5502        |                |                  | 300.0826       | 150.5450         | S    | 1710.6838 | 855.8455        | 1693.6572      | 847.3323         | 1692.6732      | 846.8402         | 15 |
| 4  | 455.1521  | 228.0797        |                |                  | 437.1415       | 219.0744         | H    | 1623.6517 | 812.3295        | 1606.6252      | 803.8162         | 1605.6412      | 803.3242         | 14 |
| 5  | 542.1841  | 271.5957        |                |                  | 524.1736       | 262.5904         | S    | 1486.5928 | 743.8001        | 1469.5663      | 735.2868         | 1468.5823      | 734.7948         | 13 |
| 6  | 613.2212  | 307.1143        |                |                  | 595.2107       | 298.1090         | A    | 1399.5608 | 700.2840        | 1382.5343      | 691.7708         | 1381.5502      | 691.2788         | 12 |
| 7  | 742.2638  | 371.6356        |                |                  | 724.2533       | 362.6303         | E    | 1328.5237 | 664.7655        | 1311.4971      | 656.2522         | 1310.5131      | 655.7602         | 11 |
| 8  | 857.2908  | 429.1490        |                |                  | 839.2802       | 420.1437         | D    | 1199.4811 | 600.2442        | 1182.4546      | 591.7309         | 1181.4705      | 591.2389         | 10 |
| 9  | 926.3122  | 463.6598        |                |                  | 908.3017       | 454.6545         | S    | 1084.4542 | 542.7307        | 1067.4276      | 534.2174         | 1066.4436      | 533.7254         | 9  |
| 10 | 1055.3548 | 528.1811        |                |                  | 1037.3443      | 519.1758         | E    | 1015.4327 | 508.2200        | 998.4061       | 499.7067         | 997.4221       | 499.2147         | 8  |
| 11 | 1170.3818 | 585.6945        |                |                  | 1152.3712      | 576.6892         | D    | 886.3901  | 443.6987        | 869.3636       | 435.1854         | 868.3795       | 434.6934         | 7  |
| 12 | 1299.4244 | 650.2158        |                |                  | 1281.4138      | 641.2105         | E    | 771.3632  | 386.1852        | 754.3366       | 377.6719         | 753.3526       | 377.1799         | 6  |
| 13 | 1427.5193 | 714.2633        | 1410.4928      | 705.7500         | 1409.5088      | 705.2580         | K    | 642.3206  | 321.6639        | 625.2940       | 313.1506         | 624.3100       | 312.6586         | 5  |
| 14 | 1542.5463 | 771.7768        | 1525.5197      | 763.2635         | 1524.5357      | 762.7715         | D    | 514.2256  | 257.6164        | 497.1991       | 249.1032         | 496.2150       | 248.6112         | 4  |
| 15 | 1657.5732 | 829.2902        | 1640.5467      | 820.7770         | 1639.5627      | 820.2850         | D    | 399.1987  | 200.1030        | 382.1721       | 191.5897         | 381.1881       | 191.0977         | 3  |
| 16 | 1794.6321 | 897.8197        | 1777.6056      | 889.3064         | 1776.6216      | 888.8144         | H    | 284.1717  | 142.5895        | 267.1452       | 134.0762         |                |                  | 2  |
| 17 |           |                 |                |                  |                |                  | K    | 147.1128  | 74.0600         | 130.0863       | 65.5468          |                |                  | 1  |

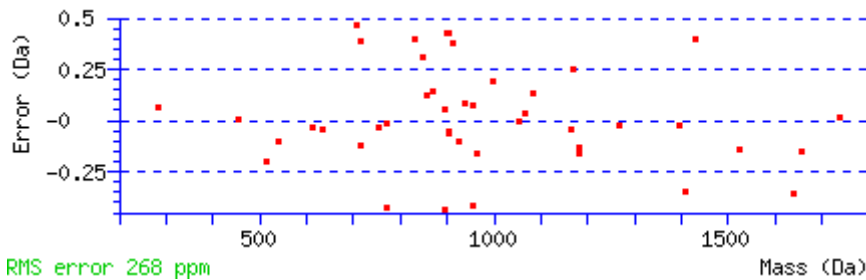

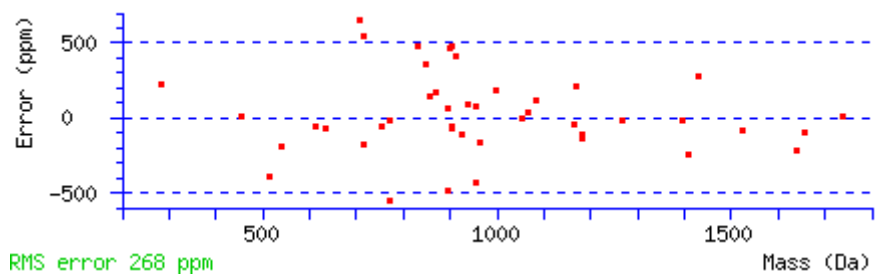

IDENTIFICATION 152

MS/MS Fragmentation of HIVSNDSSDSDDEAQQPK

Found in IPI00111169

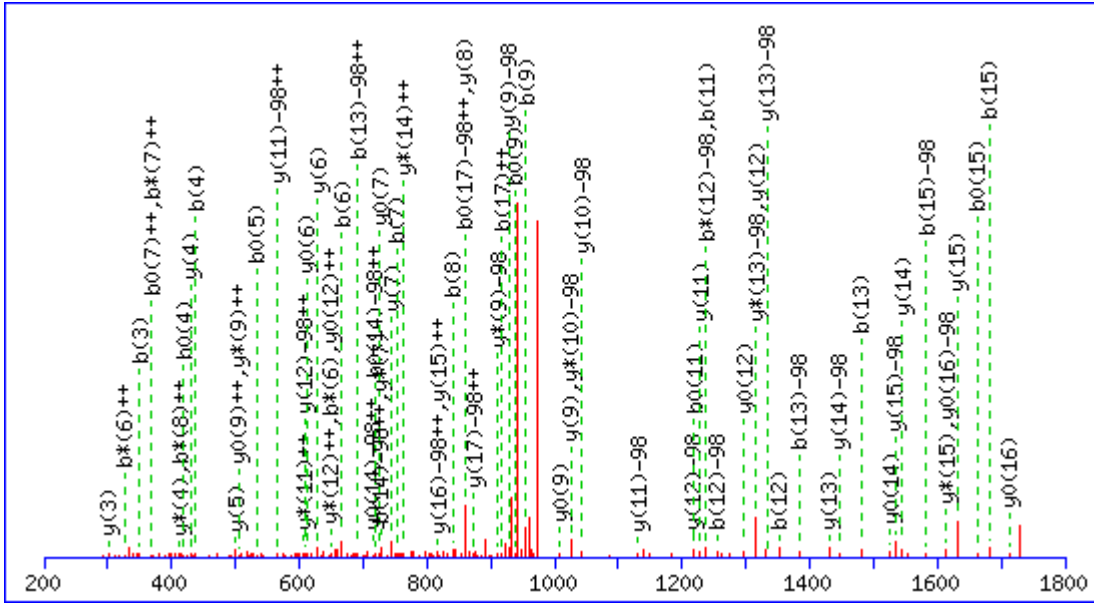

Monoisotopic mass of neutral peptide Mr(calc): 1979.7746

Fixed modifications: Carbamidomethyl (C) (apply to specified residues or termini only)

Variable modifications:

S10 : Phospho (ST), with neutral losses 0.0000(shown in table), 97.9769

Ions Score: 65 Expect: 5.2e-05 (help)

| #  | b         | b <sup>++</sup> | b <sup>*</sup> | b <sup>+++</sup> | b <sup>0</sup> | b <sup>0++</sup> | Seq. | y         | y <sup>++</sup> | y <sup>*</sup> | y <sup>+++</sup> | y <sup>0</sup> | y <sup>0++</sup> | #  |
|----|-----------|-----------------|----------------|------------------|----------------|------------------|------|-----------|-----------------|----------------|------------------|----------------|------------------|----|
| 1  | 138.0662  | 69.5367         |                |                  |                |                  | H    |           |                 |                |                  |                |                  | 18 |
| 2  | 251.1503  | 126.0788        |                |                  |                |                  | I    | 1843.7229 | 922.3651        | 1826.6964      | 913.8518         | 1825.7124      | 913.3598         | 17 |
| 3  | 350.2187  | 175.6130        |                |                  |                |                  | V    | 1730.6389 | 865.8231        | 1713.6123      | 857.3098         | 1712.6283      | 856.8178         | 16 |
| 4  | 437.2507  | 219.1290        |                |                  | 419.2401       | 210.1237         | S    | 1631.5705 | 816.2889        | 1614.5439      | 807.7756         | 1613.5599      | 807.2836         | 15 |
| 5  | 551.2936  | 276.1504        | 534.2671       | 267.6372         | 533.2831       | 267.1452         | N    | 1544.5384 | 772.7729        | 1527.5119      | 764.2596         | 1526.5279      | 763.7676         | 14 |
| 6  | 666.3206  | 333.6639        | 649.2940       | 325.1506         | 648.3100       | 324.6586         | D    | 1430.4955 | 715.7514        | 1413.4690      | 707.2381         | 1412.4849      | 706.7461         | 13 |
| 7  | 753.3526  | 377.1799        | 736.3260       | 368.6667         | 735.3420       | 368.1747         | S    | 1315.4686 | 658.2379        | 1298.4420      | 649.7246         | 1297.4580      | 649.2326         | 12 |
| 8  | 840.3846  | 420.6959        | 823.3581       | 412.1827         | 822.3741       | 411.6907         | S    | 1228.4365 | 614.7219        | 1211.4100      | 606.2086         | 1210.4260      | 605.7166         | 11 |
| 9  | 955.4116  | 478.2094        | 938.3850       | 469.6961         | 937.4010       | 469.2041         | D    | 1141.4045 | 571.2059        | 1124.3780      | 562.6926         | 1123.3939      | 562.2006         | 10 |
| 10 | 1122.4099 | 561.7086        | 1105.3834      | 553.1953         | 1104.3994      | 552.7033         | S    | 1026.3776 | 513.6924        | 1009.3510      | 505.1791         | 1008.3670      | 504.6871         | 9  |
| 11 | 1237.4369 | 619.2221        | 1220.4103      | 610.7088         | 1219.4263      | 610.2168         | D    | 859.3792  | 430.1932        | 842.3527       | 421.6800         | 841.3686       | 421.1880         | 8  |
| 12 | 1352.4638 | 676.7355        | 1335.4373      | 668.2223         | 1334.4532      | 667.7303         | D    | 744.3523  | 372.6798        | 727.3257       | 364.1665         | 726.3417       | 363.6745         | 7  |
| 13 | 1481.5064 | 741.2568        | 1464.4799      | 732.7436         | 1463.4958      | 732.2516         | E    | 629.3253  | 315.1663        | 612.2988       | 306.6530         | 611.3148       | 306.1610         | 6  |
| 14 | 1552.5435 | 776.7754        | 1535.5170      | 768.2621         | 1534.5330      | 767.7701         | A    | 500.2827  | 250.6450        | 483.2562       | 242.1317         |                |                  | 5  |
| 15 | 1680.6021 | 840.8047        | 1663.5755      | 832.2914         | 1662.5915      | 831.7994         | Q    | 429.2456  | 215.1264        | 412.2191       | 206.6132         |                |                  | 4  |
| 16 | 1737.6236 | 869.3154        | 1720.5970      | 860.8021         | 1719.6130      | 860.3101         | G    | 301.1870  | 151.0972        | 284.1605       | 142.5839         |                |                  | 3  |
| 17 | 1834.6763 | 917.8418        | 1817.6498      | 909.3285         | 1816.6658      | 908.8365         | P    | 244.1656  | 122.5864        | 227.1390       | 114.0731         |                |                  | 2  |
| 18 |           |                 |                |                  |                |                  | K    | 147.1128  | 74.0600         | 130.0863       | 65.5468          |                |                  | 1  |



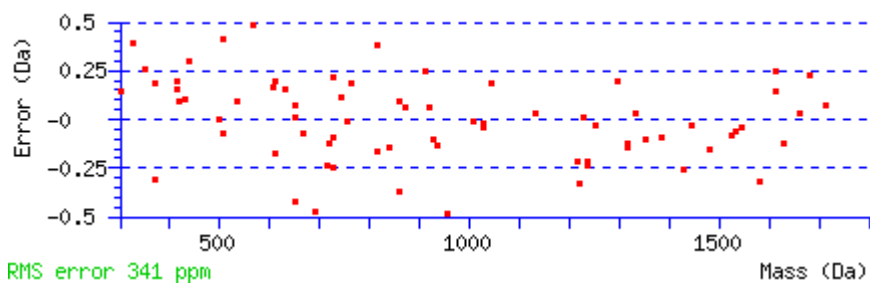

RMS error 341 ppm

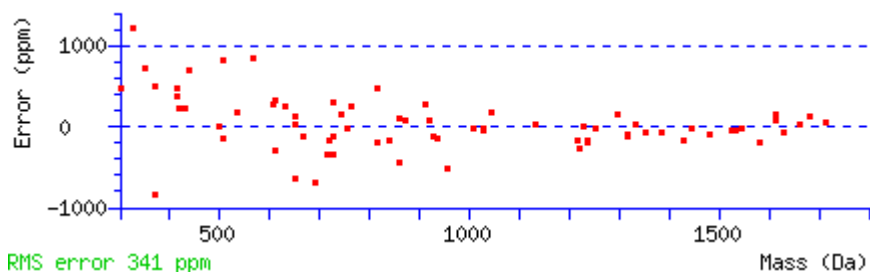

RMS error 341 ppm
